# Supplementary material
Source: HighWire-hosted journal article supplement (doi:10.1101/rna.080485.125)
Supplement: Supplemental_Additional_Data.docx [file Supplemental_Additional_Data.docx]

Description of additional data (provided via Zenodo)

Data accessible via link (https://doi.org/10.5281/zenodo.11478467) provided in the “Data Deposition” section.

**CPEB1_motif.meme**—CPE1 motif sequence represented as position-dependent letter-probability matrices required by FIMO to make predictions.

**CPEB2_4_motif.meme**—CPE2,4 motif sequence represented as position-dependent letter-probability matrices required by FIMO to make predictions.

**mRatBN7.2_TAPAS_ref_flat.txt**—mRatBN7.2 reference annotation in format required by TAPAS.

**mRatBN7.2_LAPA.gtf**—mRatBN7.2 reference annotation in format required by LAPA.

**FIMO_output.zip**—Compressed folder with motif predictions provided by FIMO software.

**LAPA_output_dentate_gyrus.zip**—Compressed folder with poly(A) clusters predicted by LAPA software. Each time point is represented by separate output.

**TAPAS_output_dentate_gyrus.zip**—Compressed folder with raw outputs produced by TAPAS software. Each time point is represented by separate output.

**Ninetails_output_dentate_gyrus.zip**—Compressed folder with raw outputs produced by Ninetails software for samples from DG. Subfolders are named according to the sample identifiers provided in Supplemental Table 1. For each sequencing run, 2 TSV files are produced: read classification and nonadenosine residue classification.

**Ninetails_output_synaptoneurosomes.zip**—Compressed folder with raw outputs produced by Ninetails software for samples from synaptoneurosomes. Subfolders are named according to the sample identifiers provided in Supplemental Table 1. For each sequencing run, 2 TSV files are produced: read classification and nonadenosine residue classification.

**PolyA_clusters_high_confident.bed**—High-confidence poly(A) clusters annotation in bed format.
