# Supplementary material
Source: HighWire-hosted journal article supplement (doi:10.1101/rna.080485.125)
Supplement: Supplemental_Legends.docx [file Supplemental_Legends.docx]

# Description of provided supplementary data

**Supplementary Table 1. Key resource table. (A)**Characteristics of analyzed material (e.g. sample identifiers, number of animals used, reads produced, accession numbers). **(B)** Key resources (antibodies, reagents, software).

**Supplementary Table 2. Summary of dentate gyri DRS data per gene. (A)** Differential expression and differential adenylation data for 10 min timepoint. **(B)** Differential expression and differential adenylation data for 60 min timepoint. **(C)** GO-terms for genes with significantly elongated poly(A) tails in 10 min timepoint. **(D)** GO-terms for genes with significantly elongated poly(A) tails in 60 min timepoint. **(E)** GO-terms for upregulated genes in 10 min timepoint. **(F)** GO-terms for upregulated genes in 60 min timepoint. **(G)** GO-terms for upregulated genes with CPEB-binding motifs in 10 min timepoint. **(H)** GO-terms for upregulated genes with CPEB-binding motifs in 60 min timepoint.

**Supplementary Table 3. Summary of dentate gyri cDNA data per gene. (A)** Differential expression and differential adenylation data for 10 min timepoint. **(B)** Differential expression and differential adenylation data for 60 min timepoint. **(C)** GO-terms for genes with significantly elongated poly(A) tails in 10 min timepoint. **(D)** GO-terms for genes with significantly elongated poly(A) tails in 60 min timepoint. **(E)** GO-terms for upregulated genes in 10 min timepoint. **(F)** GO-terms for upregulated genes in 60 min timepoint. **(G)** GO-terms for upregulated genes with CPEB-binding motifs in 10 min timepoint. **(H)** GO-terms for upregulated genes with CPEB-binding motifs in 60 min timepoint.

**Supplementary Table 4.** **High-confidence PASs.** **(A)** PASs predicted for datasets obtained 10 min after LTP induction by TAPAS. **(B)** High confidence poly(A) clusters predicted by LAPA for datasets obtained 10 min after LTP induction. **(C)** PASs predicted for datasets obtained 60 min after LTP induction. **(D)** High confidence poly(A) clusters predicted by LAPA for datasets obtained 60 min after LTP induction.

**Supplementary Table 5.** **Nonadenosine profiling upon LTP induction. (A)** Summary of Ninetails pipeline for dentate gyrus. **(B)** List of genes containing semi-templated poly(A) tails with their adjacent nucleotide contexts.

**Supplementary Table 6. Summary of synaptoneurosomal DRS/cDNA data per gene.** **(A)** Differential expression and differential adenylation data for unfractionated synaptoneurosomes DRS sequencing. (B) Summary of Ninetails pipeline for unfractionated synaptoneurosomes DRS sequencing. (C) Differential expression and differential adenylation data for monoribosome-bound mRNA synaptoneurosomes cDNA sequencing. (D) Differential expression and differential adenylation data for polyribosome-bound mRNA synaptoneurosomes cDNA sequencing. (E) Differential expression and differential adenylation data for unfractionated synaptoneurosomes cDNA sequencing.

**Supplementary Information** – PDF file with Supplementary Figures.
