# Supplementary material
Source: HighWire-hosted journal article supplement (doi:10.1101/rna.080485.125)
Supplement: Supplementary_Table_1.xlsx [file Supplementary_Table_1.xlsx]

## Sheet: sequenced_samples
sample_name	scientific name	taxid	reference	platform	kit	guppy	dorado	nanopolish	ninetails	total reads	accession number	project_accession	secondary_accession	source	comments
Rat1_LDG_DRS	Rattus norvegicus	10116	mRatBN7.2	ONT DRS	SQK-RNA002	6.0.0	NA	0.13.2	1.0.2	518621	ERS16372238	PRJEB75356	ERP159930	https://doi.org/10.1038/s44318-024-00258-3	Sample from rat #1 (one individual)
Rat2_LDG_DRS	Rattus norvegicus	10116	mRatBN7.2	ONT DRS	SQK-RNA002	6.0.0	NA	0.13.2	1.0.2	571338	ERS16372281	PRJEB75356	ERP159930	https://doi.org/10.1038/s44318-024-00258-3	Sample from rat #2 (one individual)
Rat3_LDG_DRS	Rattus norvegicus	10116	mRatBN7.2	ONT DRS	SQK-RNA002	6.0.0	NA	0.13.2	1.0.2	598407	ERS19295864	PRJEB75352	ERP159926	this work	Sample from rat #3 (one individual)
Rat4_LDG_DRS	Rattus norvegicus	10116	mRatBN7.2	ONT DRS	SQK-RNA002	6.0.0	NA	0.13.2	1.0.2	365148	ERS19295865	PRJEB75352	ERP159926	this work	Sample from rat #4 (one individual)
Rat5_LDG_DRS	Rattus norvegicus	10116	mRatBN7.2	ONT DRS	SQK-RNA002	6.0.0	NA	0.13.2	1.0.2	600867	ERS19295866	PRJEB75352	ERP159926	this work	Sample from rat #5 (one individual)
Rat6_LDG_DRS	Rattus norvegicus	10116	mRatBN7.2	ONT DRS	SQK-RNA002	6.0.0	NA	0.13.2	1.0.2	337434	ERS19295867	PRJEB75352	ERP159926	this work	Sample from rat #6 (one individual)
Rat7_LDG_DRS	Rattus norvegicus	10116	mRatBN7.2	ONT DRS	SQK-RNA002	6.0.0	NA	0.13.2	1.0.2	311584	ERS19295868	PRJEB75352	ERP159926	this work	Sample from rat #7 (one individual)
Rat8_LDG_DRS	Rattus norvegicus	10116	mRatBN7.2	ONT DRS	SQK-RNA002	6.0.0	NA	0.13.2	1.0.2	510996	ERS19295869	PRJEB75352	ERP159926	this work	Sample from rat #8 (one individual)
Rat1_RDG_DRS	Rattus norvegicus	10116	mRatBN7.2	ONT DRS	SQK-RNA002	6.0.0	NA	0.13.2	1.0.2	167600	ERS16372232	PRJEB75356	ERP159930	https://doi.org/10.1038/s44318-024-00258-3	Sample from rat #1 (one individual)
Rat2_RDG_DRS	Rattus norvegicus	10116	mRatBN7.2	ONT DRS	SQK-RNA002	6.0.0	NA	0.13.2	1.0.2	503099	ERS16372283	PRJEB75356	ERP159930	https://doi.org/10.1038/s44318-024-00258-3	Sample from rat #2 (one individual)
Rat3_RDG_DRS	Rattus norvegicus	10116	mRatBN7.2	ONT DRS	SQK-RNA002	6.0.0	NA	0.13.2	1.0.2	639687	ERS19295870	PRJEB75352	ERP159926	this work	Sample from rat #3 (one individual)
Rat4_RDG_DRS_a	Rattus norvegicus	10116	mRatBN7.2	ONT DRS	SQK-RNA002	6.0.0	NA	0.13.2	1.0.2	29502	ERS19295871	PRJEB75352	ERP159926	this work	Sample from rat #4 (one individual)
Rat4_RDG_DRS_b	Rattus norvegicus	10116	mRatBN7.2	ONT DRS	SQK-RNA002	6.0.0	NA	0.13.2	1.0.2	265822	ERS19295872	PRJEB75352	ERP159926	this work	Sample from rat #4 (one individual)
Rat5_RDG_DRS	Rattus norvegicus	10116	mRatBN7.2	ONT DRS	SQK-RNA002	6.0.0	NA	0.13.2	1.0.2	740048	ERS19295873	PRJEB75352	ERP159926	this work	Sample from rat #5 (one individual)
Rat6_RDG_DRS	Rattus norvegicus	10116	mRatBN7.2	ONT DRS	SQK-RNA002	6.0.0	NA	0.13.2	1.0.2	567942	ERS19295874	PRJEB75352	ERP159926	this work	Sample from rat #6 (one individual)
Rat7_RDG_DRS	Rattus norvegicus	10116	mRatBN7.2	ONT DRS	SQK-RNA002	6.0.0	NA	0.13.2	1.0.2	472566	ERS19295875	PRJEB75352	ERP159926	this work	Sample from rat #7 (one individual)
Rat8_RDG_DRS	Rattus norvegicus	10116	mRatBN7.2	ONT DRS	SQK-RNA002	6.0.0	NA	0.13.2	1.0.2	606447	ERS19295876	PRJEB75352	ERP159926	this work	Sample from rat #8 (one individual)
Rat3_LDG_cDNA	Rattus norvegicus	10116	mRatBN7.2	ONT cDNA	SQK-PCS111	NA	0.5.3	NA	NA	13341575	ERS19295877	PRJEB75352	ERP159926	this work	Sample from rat #3 (one individual)
Rat4_LDG_cDNA	Rattus norvegicus	10116	mRatBN7.2	ONT cDNA	SQK-PCS111	NA	0.5.3	NA	NA	18532583	ERS19295878	PRJEB75352	ERP159926	this work	Sample from rat #4 (one individual)
Rat6_LDG_cDNA	Rattus norvegicus	10116	mRatBN7.2	ONT cDNA	SQK-PCS111	NA	0.5.3	NA	NA	16049817	ERS19295879	PRJEB75352	ERP159926	this work	Sample from rat #6 (one individual)
Rat7_LDG_cDNA	Rattus norvegicus	10116	mRatBN7.2	ONT cDNA	SQK-PCS111	NA	0.5.3	NA	NA	17714198	ERS19295880	PRJEB75352	ERP159926	this work	Sample from rat #7 (one individual)
Rat8_LDG_cDNA	Rattus norvegicus	10116	mRatBN7.2	ONT cDNA	SQK-PCS111	NA	0.5.3	NA	NA	15082021	ERS19295881	PRJEB75352	ERP159926	this work	Sample from rat #8 (one individual)
Rat3_RDG_cDNA	Rattus norvegicus	10116	mRatBN7.2	ONT cDNA	SQK-PCS111	NA	0.5.3	NA	NA	12408112	ERS19295882	PRJEB75352	ERP159926	this work	Sample from rat #3 (one individual)
Rat4_RDG_cDNA	Rattus norvegicus	10116	mRatBN7.2	ONT cDNA	SQK-PCS111	NA	0.5.3	NA	NA	8042800	ERS19295883	PRJEB75352	ERP159926	this work	Sample from rat #4 (one individual)
Rat6_RDG_cDNA	Rattus norvegicus	10116	mRatBN7.2	ONT cDNA	SQK-PCS111	NA	0.5.3	NA	NA	13538831	ERS19295884	PRJEB75352	ERP159926	this work	Sample from rat #6 (one individual)
Rat7_RDG_cDNA	Rattus norvegicus	10116	mRatBN7.2	ONT cDNA	SQK-PCS111	NA	0.5.3	NA	NA	14896116	ERS19295885	PRJEB75352	ERP159926	this work	Sample from rat #7 (one individual)
Rat8_RDG_cDNA	Rattus norvegicus	10116	mRatBN7.2	ONT cDNA	SQK-PCS111	NA	0.5.3	NA	NA	18092989	ERS19295886	PRJEB75352	ERP159926	this work	Sample from rat #8 (one individual)
SN1_NMDAR_DRS	Rattus norvegicus	10116	mRatBN7.2	ONT DRS	SQK-RNA002	6.0.0	NA	0.13.2	1.0.2	405669	ERS19295887	PRJEB75352	ERP159926	this work	Sample from 5 individuals (the same as in SN1_CTRL_DRS)
SN2_NMDAR_DRS	Rattus norvegicus	10116	mRatBN7.2	ONT DRS	SQK-RNA002	6.0.0	NA	0.13.2	1.0.2	413821	ERS19295888	PRJEB75352	ERP159926	this work	Sample from 5 individuals (the same as in SN2_CTRL_DRS)
SN3_NMDAR_DRS	Rattus norvegicus	10116	mRatBN7.2	ONT DRS	SQK-RNA002	6.0.0	NA	0.13.2	1.0.2	435208	ERS19295889	PRJEB75352	ERP159926	this work	Sample from 5 individuals (the same as in SN3_CTRL_DRS)
SN4_NMDAR_DRS	Rattus norvegicus	10116	mRatBN7.2	ONT DRS	SQK-RNA002	6.0.0	NA	0.13.2	1.0.2	500128	ERS19295890	PRJEB75352	ERP159926	this work	Sample from 5 individuals (the same as in SN4_CTRL_DRS)
SN1_CTRL_DRS	Rattus norvegicus	10116	mRatBN7.2	ONT DRS	SQK-RNA002	6.0.0	NA	0.13.2	1.0.2	440804	ERS19295891	PRJEB75352	ERP159926	this work	Sample from 5 individuals (the same as in SN1_NMDAR_DRS)
SN2_CTRL_DRS	Rattus norvegicus	10116	mRatBN7.2	ONT DRS	SQK-RNA002	6.0.0	NA	0.13.2	1.0.2	197726	ERS19295892	PRJEB75352	ERP159926	this work	Sample from 5 individuals (the same as in SN2_NMDAR_DRS)
SN3_CTRL_DRS	Rattus norvegicus	10116	mRatBN7.2	ONT DRS	SQK-RNA002	6.0.0	NA	0.13.2	1.0.2	516536	ERS19295893	PRJEB75352	ERP159926	this work	Sample from 5 individuals (the same as in SN3_NMDAR_DRS)
SN4_CTRL_DRS	Rattus norvegicus	10116	mRatBN7.2	ONT DRS	SQK-RNA002	6.0.0	NA	0.13.2	1.0.2	543085	ERS19295894	PRJEB75352	ERP159926	this work	Sample from 5 individuals (the same as in SN4_NMDAR_DRS)
SP1_cDNA	Rattus norvegicus	10116	mRatBN7.2	ONT cDNA	SQK-PCB111-24	NA	0.8.2	NA	NA	861713	ERS23301758	PRJEB75352	ERP159926	this work	Sample from 6 individuals (the same for rows 37-54)
SP2_cDNA	Rattus norvegicus	10116	mRatBN7.2	ONT cDNA	SQK-PCB111-24	NA	0.8.2	NA	NA	1057316	ERS23301759	PRJEB75352	ERP159926	this work	Sample from 6 individuals (the same for rows 37-54)
SP3_cDNA	Rattus norvegicus	10116	mRatBN7.2	ONT cDNA	SQK-PCB111-24	NA	0.8.2	NA	NA	1008057	ERS23301760	PRJEB75352	ERP159926	this work	Sample from 6 individuals (the same for rows 37-54)
KP1_cDNA	Rattus norvegicus	10116	mRatBN7.2	ONT cDNA	SQK-PCB111-24	NA	0.8.2	NA	NA	715163	ERS23301761	PRJEB75352	ERP159926	this work	Sample from 6 individuals (the same for rows 37-54)
KP2_cDNA	Rattus norvegicus	10116	mRatBN7.2	ONT cDNA	SQK-PCB111-24	NA	0.8.2	NA	NA	1073658	ERS23301762	PRJEB75352	ERP159926	this work	Sample from 6 individuals (the same for rows 37-54)
KP3_cDNA	Rattus norvegicus	10116	mRatBN7.2	ONT cDNA	SQK-PCB111-24	NA	0.8.2	NA	NA	886519	ERS23301763	PRJEB75352	ERP159926	this work	Sample from 6 individuals (the same for rows 37-54)
SM1_cDNA	Rattus norvegicus	10116	mRatBN7.2	ONT cDNA	SQK-PCB111-24	NA	0.8.2	NA	NA	631538	ERS23301764	PRJEB75352	ERP159926	this work	Sample from 6 individuals (the same for rows 37-54)
SM2_cDNA	Rattus norvegicus	10116	mRatBN7.2	ONT cDNA	SQK-PCB111-24	NA	0.8.2	NA	NA	813570	ERS23301765	PRJEB75352	ERP159926	this work	Sample from 6 individuals (the same for rows 37-54)
SM3_cDNA	Rattus norvegicus	10116	mRatBN7.2	ONT cDNA	SQK-PCB111-24	NA	0.8.2	NA	NA	860473	ERS23301766	PRJEB75352	ERP159926	this work	Sample from 6 individuals (the same for rows 37-54)
KM1_cDNA	Rattus norvegicus	10116	mRatBN7.2	ONT cDNA	SQK-PCB111-24	NA	0.8.2	NA	NA	1103092	ERS23301767	PRJEB75352	ERP159926	this work	Sample from 6 individuals (the same for rows 37-54)
KM2_cDNA	Rattus norvegicus	10116	mRatBN7.2	ONT cDNA	SQK-PCB111-24	NA	0.8.2	NA	NA	1005716	ERS23301768	PRJEB75352	ERP159926	this work	Sample from 6 individuals (the same for rows 37-54)
KM3_cDNA	Rattus norvegicus	10116	mRatBN7.2	ONT cDNA	SQK-PCB111-24	NA	0.8.2	NA	NA	655879	ERS23301769	PRJEB75352	ERP159926	this work	Sample from 6 individuals (the same for rows 37-54)
ST1_cDNA	Rattus norvegicus	10116	mRatBN7.2	ONT cDNA	SQK-PCB111-24	NA	0.8.2	NA	NA	848603	ERS23301770	PRJEB75352	ERP159926	this work	Sample from 6 individuals (the same for rows 37-54)
ST2_cDNA	Rattus norvegicus	10116	mRatBN7.2	ONT cDNA	SQK-PCB111-24	NA	0.8.2	NA	NA	1038698	ERS23301771	PRJEB75352	ERP159926	this work	Sample from 6 individuals (the same for rows 37-54)
ST3_cDNA	Rattus norvegicus	10116	mRatBN7.2	ONT cDNA	SQK-PCB111-24	NA	0.8.2	NA	NA	908053	ERS23301772	PRJEB75352	ERP159926	this work	Sample from 6 individuals (the same for rows 37-54)
KT1_cDNA	Rattus norvegicus	10116	mRatBN7.2	ONT cDNA	SQK-PCB111-24	NA	0.8.2	NA	NA	631340	ERS23301773	PRJEB75352	ERP159926	this work	Sample from 6 individuals (the same for rows 37-54)
KT2_cDNA	Rattus norvegicus	10116	mRatBN7.2	ONT cDNA	SQK-PCB111-24	NA	0.8.2	NA	NA	934405	ERS23301774	PRJEB75352	ERP159926	this work	Sample from 6 individuals (the same for rows 37-54)
KT3_cDNA	Rattus norvegicus	10116	mRatBN7.2	ONT cDNA	SQK-PCB111-24	NA	0.8.2	NA	NA	898003	ERS23301775	PRJEB75352	ERP159926	this work	Sample from 6 individuals (the same for rows 37-54)

## Sheet: resources
reagent/resource	source	ID
Antibodies
c-Jun	Cell Signaling	Cat#9165
Gfap	Proteintech	Cat#16825-1-AP
GluA2	Cell Signaling	Cat#13607
Hsp90	Abcam	Cat#ab13495
Kdm1	Abcam	Cat#ab129195
Psd95	Merck Millipore	Cat#MAB1598
synaptophysin	Merck Millipore	Cat#MAB329
tubulin	Santa Cruz Biotechnology	Cat#sc-134239
Chemicals, peptides, and recombinant proteins
Agilent RNA 6000 Nano Kit	Agilent	Cat#5067-1511
cOmplete™, EDTA-free Protease Inhibitor Cocktail	Roche	Cat#05056489001
GlycoBlue™ Coprecipitant	Invitrogen	Cat#AM9515
KAPA Pure Beads	Roche	Cat#07983298001
N-Methyl-D-aspartic acid (NMDA)	Sigma-Aldrich	Cat#M3262
PowerUp SYBR Green Master Mix	Thermo Fisher Scientific	Cat#A25742
RiboLock RNase Inhibitor	Thermo Fisher Scientific	Cat#EO0381
Critical commercial assays
TGX Stain-Free FastCast Acrylamide Kit, 10%	BioRad	Cat#161-0183
Amersham ECL Prime Western Blotting Detection Reagent	GE Healthcare	Cat#RPN2236
Phospho-MAPK Family Antibody Sampler Kit	Cell Signaling	Cat#9910
MAPK Family Antibody Sampler Kit	Cell Signaling	Cat#9926
Direct RNA Sequencing Kit	Oxford Nanopore Technologies	SQK-RNA002
cDNA-PCR Sequencing Kit	Oxford Nanopore Technologies	SQK-PCS111
Experimental models: Organisms/strains
Rat: Sprague Dawley	IMDiK, Warsaw	Tac:Cmd:SD
Oligonucleotides
random primers	GeneON	Cat#S300
Fos Fwd: 5’-CCCATCCTTACGGACTCCC-3’	this paper	N/A
Fos Rev: 5’-GAGATAGCTGCTCTACTTTGCC-3’	this paper	N/A
Arc Fwd: 5’-AAGTGCCGAGCTGAGATGC-3’	this paper	N/A
Arc Rev: 5’-CGACCTGTGCAACCCTTTC-3’	this paper	N/A
GAPDH Fwd: 5′-ATCAAGAAGGTGGTGAAGCA-3′	this paper	N/A
GAPDH Rev: 5′-CATACCAGGAAATGAGCTTC-3′	this paper	N/A
Software and algorithms
AGAT 1.4.1	Dainat et al. 2024	https://zenodo.org/records/13799920
clusterProfiler 4.0	Wu et al. 2021	https://guangchuangyu.github.io/software/clusterProfiler/
ComplexHeatmap 7d95ca5	Gu 2022	https://github.com/jokergoo/ComplexHeatmap
DESeq2 1.34.0	Love et al. 2014	https://bioconductor.org/packages/release/bioc/html/DESeq2.html
Dorado 0.5.3/0.8.2	Oxford Nanopore Technologies	https://github.com/nanoporetech/dorado
GraphPad Prism 7.0	GraphPad	https://www.graphpad.com/scientific-software/prism/
Guppy 6.0.0	Oxford Nanopore Technologies	https://community.nanoporetech.com/posts/guppy-v6-0-0-release
LAPA eb16fee	Çelik et al. 2022	https://github.com/mortazavilab/lapa
MEME 5.4.1	Grant et al. 2011	https://meme-suite.org/meme/doc/download.html
minimap2 2.17	Li 2018	https://github.com/lh3/minimap2
nanopolish 0.13.2	Workman et al. 2019	https://github.com/jts/nanopolish
pychopper 2.7.2	Oxford Nanopore Technologies	https://github.com/epi2me-labs/pychopper
python 3.8.15	Python Software Foundation	https://www.python.org/downloads/release/python-3815/
samtools 1.9	Danecek et al. 2021	https://github.com/samtools/samtools/releases
subread 2.0.6	Liao et al. 2014	https://github.com/ShiLab-Bioinformatics/subread
TAPAS d231ad5	Arefeen et al. 2018	https://github.com/arefeen/TAPAS
UCSCtools	UCSC Genome Browser Group	http://hgdownload.soe.ucsc.edu/admin/exe/linux.x86_64
R 4.1.2	R Core Team	https://cran.r-project.org/src/base/R-4/R-4.1.2.tar.gz
Biostrings 2.74.1	Pagès et al. 2024	https://bioconductor.org/packages/release/bioc/html/Biostrings.html
ComplexHeatmap 2.22.0	Gu, 2022	https://bioconductor.org/packages/release/bioc/html/ComplexHeatmap.html
dplyr 1.1.4	Wickham et al. 2022	https://dplyr.tidyverse.org
g:Profiler2 0.2.1	Raudvere et al. 2019	https://cran.r-project.org/web/packages/gprofiler2/index.html
GenomicRanges 1.58.0	Lawrence et al. 2013	https://bioconductor.org/packages/release/bioc/html/GenomicRanges.html
ggcoverage	Song & Wang 2023	https://github.com/showteeth/ggcoverage
ggplot2 3.4.1	Wickham 2016	https://github.com/tidyverse/ggplot2/releases
IRanges 2.40.1	Lawrence et al. 2013	https://bioconductor.org/packages/release/bioc/html/IRanges.html
NanoTail 0.1.0	Krawczyk et al. 2024	https://github.com/smaegol/nanotail
Ninetails 1.0.2	Gumińska et al. 2024	https://github.com/LRB-IIMCB/ninetails
stringr 1.5.1	Wickham 2023	https://stringr.tidyverse.org/
Other
Nylon Net Filters; 100 µm, 60 µm, 30 µm, 10 µm	Merck Millipore	Cat#NY1H02500, Cat#NY6002500, Cat#NY3002500, Cat#NY1002500
