# Supplementary material
Source: HighWire-hosted journal article supplement (doi:10.1101/rna.080485.125)
Supplement: Supplementary_Table_2.xlsx [file Supplementary_Table_2.xlsx]

## Sheet: DRS_10min
gene_name	chrom	Ipsi_10min_counts	Contra_10min_counts	Ipsi_10min_polya_gm_mean	Contra_10min_polya_gm_mean	polya_length_diff	polya_fold_change	polya_pvalue	polya_padj	polya_sig	polya_cohen_d	polya_effect_size	diffexp_baseMean	diffexp_baseMean_1	diffexp_baseMean_2	diffexp_lfcSE	diffexp_stat	diffexp_fold_change	diffexp_pvalue	diffexp_padj	diffexp_sig	diffexp_effect	cpeb1	cpeb2	gene_description
COX3	chrM	36378	29850	66.8351	68.2337	-1.39857	0.979503	1.81532e-61	1.78483e-57	FDR<0.05	-0.066039	negligible	8830.73	8835.48	8825.99	0.129907	-0.0168854	0.998925	0.986528	0.999837	Not Sig	nonsignificant	.	.	mitochondrially encoded cytochrome c oxidase III [Source:RGD Symbol;Acc:621873]
Actb	chr12	7524	4656	100.613	89.0226	11.5902	1.13019	4.28632e-36	2.10716e-32	FDR<0.05	0.246529	small	1508.57	1256.86	1760.28	0.283324	1.70617	1.40054	0.0879763	0.999837	Not Sig	nonsignificant	Y	.	actin, beta [Source:RGD Symbol;Acc:628837]
ATP6	chrM	38833	32382	59.4382	60.3169	-0.87863	0.985433	2.00295e-35	6.56434e-32	FDR<0.05	-0.0480089	negligible	10219	10338.3	10099.7	0.131969	-0.259319	0.976918	0.795389	0.999837	Not Sig	nonsignificant	.	.	mitochondrially encoded ATP synthase membrane subunit 6 [Source:RGD Symbol;Acc:621239]
Hspa8	chr8	3262	2518	82.4687	66.1955	16.2732	1.24584	1.78936e-34	3.51861e-31	FDR<0.05	0.334546	small	394.362	360.949	427.775	0.13728	1.76722	1.18514	0.0771914	0.999837	Not Sig	nonsignificant	.	.	heat shock protein family A (Hsp70) member 8 [Source:RGD Symbol;Acc:621725]
COX1	chrM	27818	23807	61.2984	62.4456	-1.14717	0.981629	1.61195e-34	3.51861e-31	FDR<0.05	-0.051693	negligible	5133.31	5060	5206.62	0.676893	0.0607348	1.02898	0.95157	0.999837	Not Sig	nonsignificant	.	.	mitochondrially encoded cytochrome c oxidase I [Source:RGD Symbol;Acc:621871]
Tpt1	chr15	2619	1434	74.0771	58.0516	16.0256	1.27606	3.99405e-23	6.54492e-20	FDR<0.05	0.352742	small	485.484	392.458	578.51	0.168675	3.26005	1.47407	0.00111392	0.0918849	Not Sig	nonsignificant	.	.	tumor protein, translationally-controlled 1 [Source:RGD Symbol;Acc:621623]
CYTB	chrM	20343	16270	61.7158	62.692	-0.976217	0.984428	1.23206e-22	1.73051e-19	FDR<0.05	-0.0493537	negligible	4509.17	4481.25	4537.09	0.184849	0.0934204	1.01246	0.92557	0.999837	Not Sig	nonsignificant	.	.	mitochondrially encoded cytochrome b [Source:RGD Symbol;Acc:620081]
COX2	chrM	31128	25697	53.3276	54.0828	-0.755194	0.986036	2.17301e-22	2.67063e-19	FDR<0.05	-0.0462232	negligible	7703.42	7736.4	7670.43	0.129321	-0.100096	0.991472	0.920268	0.999837	Not Sig	nonsignificant	.	.	mitochondrially encoded cytochrome c oxidase II [Source:RGD Symbol;Acc:621872]
Nrn1	chr17	1273	438	104.777	71.1301	33.647	1.47303	1.41595e-21	1.54684e-18	FDR<0.05	0.518468	medium	183.891	107.348	260.433	0.355796	3.56675	2.42605	0.000361433	0.0355984	FDR<0.05	upregulated	Y	.	neuritin 1 [Source:RGD Symbol;Acc:621586]
Ncdn	chr5	3167	1900	154.049	169.351	-15.3025	0.909641	6.70462e-21	6.59198e-18	FDR<0.05	-0.255514	small	461.399	411.565	511.234	0.130234	2.46485	1.24217	0.0137069	0.690474	Not Sig	nonsignificant	.	.	neurochondrin [Source:RGD Symbol;Acc:621734]
Nefl	chr15	1411	709	108.57	82.0446	26.5251	1.3233	2.52797e-18	2.25955e-15	FDR<0.05	0.393502	small	194.192	118.09	270.293	0.202184	5.85131	2.28888	4.8772e-09	2.68206e-06	FDR<0.05	upregulated	.	.	neurofilament light chain [Source:RGD Symbol;Acc:621458]
Actg1	chr10	3588	2064	110.903	97.7777	13.1258	1.13424	7.99538e-17	6.55088e-14	FDR<0.05	0.223573	small	612.154	522.115	702.192	0.124895	3.38797	1.3449	0.000704108	0.0627893	Not Sig	nonsignificant	.	Y	actin, gamma 1 [Source:RGD Symbol;Acc:1304556]
Cx3cl1	chr19	1166	350	112.001	85.8878	26.1128	1.30403	1.88169e-14	1.42314e-11	FDR<0.05	0.462489	small	94.1794	47.0375	141.321	0.284241	5.69575	3.00444	1.22831e-08	5.78971e-06	FDR<0.05	upregulated	.	Y	C-X3-C motif chemokine ligand 1 [Source:RGD Symbol;Acc:620458]
Ptma	chr9	983	462	96.7032	71.9744	24.7288	1.34358	2.15143e-13	1.51092e-10	FDR<0.05	0.429777	small	194.726	145.209	244.243	0.180317	4.07405	1.68201	4.62028e-05	0.00692937	FDR<0.05	nonsignificant	.	Y
Ftl1	chr1	776	316	116.572	87.3456	29.2263	1.33461	1.29838e-11	8.51045e-09	FDR<0.05	0.443315	small	145.42	107.721	183.119	0.231229	3.31925	1.69993	0.00090259	0.0777602	Not Sig	nonsignificant	.	.	ferritin light chain 1 [Source:RGD Symbol;Acc:61813]
LOC680121	chr11	790	626	69.3066	54.2824	15.0242	1.27678	3.07104e-11	1.88716e-08	FDR<0.05	0.351022	small	186.063	196.378	175.748	0.491155	-0.300946	0.894945	0.763456	0.999837	Not Sig	nonsignificant	.	.	similar to heat shock protein 8 [Source:RGD Symbol;Acc:1595502]
LOC100360413	chrX	1194	969	68.6785	57.265	11.4135	1.19931	4.94662e-11	2.86089e-08	FDR<0.05	0.255489	small	315.726	393.749	237.704	0.604204	-1.19566	0.603694	0.231827	0.999837	Not Sig	nonsignificant	.	.	eukaryotic translation elongation factor 1 alpha 1-like [Source:RGD Symbol;Acc:2322143]
ND1	chrM	16474	14278	52.5691	53.3814	-0.812308	0.984783	4.81751e-10	2.63143e-07	FDR<0.05	-0.0443807	negligible	4208.36	4305.77	4110.96	0.164744	-0.412537	0.954757	0.679946	0.999837	Not Sig	nonsignificant	.	.	mitochondrially encoded NADH:ubiquinone oxidoreductase core subunit 1 [Source:RGD Symbol;Acc:620555]
ND2	chrM	15448	14087	54.3884	54.9157	-0.527285	0.990398	5.61062e-10	2.90335e-07	FDR<0.05	-0.0309243	negligible	3670.82	3812.36	3529.29	0.146315	-0.770377	0.925748	0.441076	0.999837	Not Sig	nonsignificant	.	.	mitochondrially encoded NADH:ubiquinone oxidoreductase core subunit 2 [Source:RGD Symbol;Acc:620556]
Tuba1a	chr7	3615	2144	85.9559	78.4669	7.48897	1.09544	6.2297e-10	3.06252e-07	FDR<0.05	0.175203	negligible	679.201	580.078	778.324	0.131538	3.23985	1.34176	0.00119594	0.0960195	Not Sig	nonsignificant	.	.	tubulin, alpha 1A [Source:RGD Symbol;Acc:619717]
Ubc	chr12	1633	849	98.0188	82.757	15.2618	1.18442	9.07128e-10	4.24709e-07	FDR<0.05	0.270833	small	158.886	116.551	201.22	0.169422	4.74391	1.72645	2.09632e-06	0.000446245	FDR<0.05	nonsignificant	.	.	ubiquitin C [Source:RGD Symbol;Acc:621244]
Dnaja1	chr5	637	298	113.316	87.286	26.0296	1.29821	2.50137e-09	1.11789e-06	FDR<0.05	0.435839	small	106.631	82.46	130.803	0.204077	3.20857	1.58626	0.00133398	0.100033	Not Sig	nonsignificant	.	.	DnaJ heat shock protein family (Hsp40) member A1 [Source:RGD Symbol;Acc:620942]
Atp2a2	chr12	935	586	112.133	91.3691	20.7637	1.22725	3.3282e-09	1.42273e-06	FDR<0.05	0.280647	small	172.017	150.171	193.863	0.178415	1.95897	1.29095	0.0501158	0.999837	Not Sig	nonsignificant	.	Y	ATPase sarcoplasmic/endoplasmic reticulum Ca2+ transporting 2 [Source:RGD Symbol;Acc:2174]
Egr3	chr15	1415	82	130.446	82.9762	47.4696	1.57209	7.53392e-09	3.0864e-06	FDR<0.05	0.679184	medium	84.1374	12.9155	155.359	0.283727	12.4455	12.0289	1.47876e-35	4.87918e-32	FDR<0.05	upregulated	Y	Y	early growth response 3 [Source:RGD Symbol;Acc:2545]
Rpl41	chr7	1720	1092	81.2547	71.1935	10.0612	1.14132	8.65836e-09	3.40516e-06	FDR<0.05	0.240591	small	151.618	144.879	158.357	0.21033	0.573388	1.09302	0.566382	0.999837	Not Sig	nonsignificant	.	.
Sat1	chrX	533	180	165.965	119.219	46.7453	1.39209	1.0857e-08	4.10563e-06	FDR<0.05	0.513423	medium	94.3573	55.2835	133.431	0.284749	4.3816	2.41358	1.17814e-05	0.00204592	FDR<0.05	upregulated	.	.	spermidine/spermine N1-acetyl transferase 1 [Source:RGD Symbol;Acc:1586174]
Vgf	chr12	696	109	118.175	80.7254	37.45	1.46392	3.70456e-08	1.34901e-05	FDR<0.05	0.56849	medium	9.88854	2.50478	17.2723	0.680005	4.44944	6.89573	8.60956e-06	0.00153553	FDR<0.05	upregulated	.	.	VGF nerve growth factor inducible [Source:RGD Symbol;Acc:69399]
Zfand5	chr1	628	262	118.835	90.568	28.2669	1.31211	1.03444e-07	3.63236e-05	FDR<0.05	0.363222	small	100.435	67.1804	133.69	0.236358	3.98041	1.99001	6.87963e-05	0.00907974	FDR<0.05	nonsignificant	.	Y	zinc finger AN1-type containing 5 [Source:RGD Symbol;Acc:1310776]
Ckb	chr6	3122	1974	106.675	98.8729	7.80232	1.07891	2.4557e-07	8.32567e-05	FDR<0.05	0.157666	negligible	676.238	601.87	750.606	0.15408	2.05515	1.24712	0.0398647	0.999837	Not Sig	nonsignificant	.	.	creatine kinase B [Source:RGD Symbol;Acc:2357]
ND4	chrM	15651	13712	54.9598	55.8997	-0.939917	0.983186	2.90407e-07	9.51759e-05	FDR<0.05	-0.0448656	negligible	3597.44	3716.78	3478.1	0.167616	-0.578501	0.935785	0.562926	0.999837	Not Sig	nonsignificant	.	.	mitochondrially encoded NADH:ubiquinone oxidoreductase core subunit 4 [Source:RGD Symbol;Acc:620559]
Eif4a1	chr10	829	427	106.92	86.2564	20.6631	1.23955	6.72333e-07	0.000213238	FDR<0.05	0.29207	small	151.416	117.918	184.913	0.181095	3.43498	1.56815	0.000592605	0.0543139	Not Sig	nonsignificant	.	Y	eukaryotic translation initiation factor 4A1 [Source:RGD Symbol;Acc:735141]
Dstnl1	chr20	316	122	125.359	85.9124	39.4465	1.45915	9.81471e-07	0.000301557	FDR<0.05	0.535514	medium	14.0432	8.60481	19.4816	0.504563	2.87195	2.26404	0.0040795	0.258852	Not Sig	nonsignificant	.	.
Nptx1	chr10	1307	797	108.909	93.458	15.4507	1.16532	1.57045e-06	0.000467899	FDR<0.05	0.233637	small	123.813	107.982	139.643	0.193489	1.92982	1.2932	0.0536291	0.999837	Not Sig	nonsignificant	.	Y	neuronal pentraxin 1 [Source:RGD Symbol;Acc:628894]
Rhob	chr6	1398	576	106.754	88.4914	18.2631	1.20638	3.6006e-06	0.00104121	FDR<0.05	0.220762	small	162.313	106.023	218.602	0.238753	4.26497	2.06183	1.99925e-05	0.00321782	FDR<0.05	upregulated	.	Y	ras homolog family member B [Source:RGD Symbol;Acc:621309]
Arf4	chr16	373	173	115.036	82.6453	32.3912	1.39193	3.94656e-06	0.00110864	FDR<0.05	0.382331	small	70.9029	48.8854	92.9203	0.245328	3.60936	1.90078	0.000306959	0.0326713	FDR<0.05	nonsignificant	.	.	ADP-ribosylation factor 4 [Source:RGD Symbol;Acc:621275]
Pcdh8	chr15	1413	128	113.374	83.6582	29.716	1.35521	5.56815e-06	0.00152072	FDR<0.05	0.41248	small	178.575	36.7677	320.382	0.2525	12.4004	8.71368	2.60016e-35	5.71948e-32	FDR<0.05	upregulated	Y	.	protocadherin 8 [Source:RGD Symbol;Acc:69350]
LOC100360087	chr5	424	189	78.0259	60.4986	17.5273	1.28971	5.91326e-06	0.00157133	FDR<0.05	0.443748	small	67.1103	44.9177	89.303	0.236409	4.17643	1.98815	2.96114e-05	0.00454432	FDR<0.05	nonsignificant	.	.	ferritin light chain 1-like [Source:RGD Symbol;Acc:2322860]
Hspa5	chr3	682	316	90.6054	74.9409	15.6645	1.20902	8.32811e-06	0.00215479	FDR<0.05	0.290016	small	121.126	81.3632	160.888	0.23655	3.93031	1.97741	8.48356e-05	0.0109771	FDR<0.05	nonsignificant	.	.	heat shock protein family A (Hsp70) member 5 [Source:RGD Symbol;Acc:2843]
Dclk1	chr2	486	298	127.875	104.463	23.4116	1.22411	1.32095e-05	0.0032469	FDR<0.05	0.342374	small	35.3167	28.9313	41.7021	0.276971	1.87128	1.44142	0.0613057	0.999837	Not Sig	nonsignificant	.	Y	doublecortin-like kinase 1 [Source:RGD Symbol;Acc:68437]
Thra	chr10	682	552	109.973	125.846	-15.8731	0.873869	1.45833e-05	0.00349715	FDR<0.05	-0.254134	small	133.968	130.462	137.474	0.192288	0.213489	1.05375	0.830946	0.999837	Not Sig	nonsignificant	.	.	thyroid hormone receptor alpha [Source:RGD Symbol;Acc:3857]
Arpp21	chr8	305	106	104.145	70.8942	33.2512	1.46903	2.35672e-05	0.00551697	FDR<0.05	0.507407	medium	44.5998	29.7884	59.4111	0.302203	3.13288	1.99444	0.00173101	0.125527	Not Sig	nonsignificant	.	Y	cAMP regulated phosphoprotein 21 [Source:RGD Symbol;Acc:1593239]
Egr1	chr18	672	36	115.078	70.9722	44.106	1.62145	4.09693e-05	0.00906682	FDR<0.05	0.708122	medium	7.96154	1.12169	14.8014	0.927758	4.17956	13.1956	2.92072e-05	0.00454432	FDR<0.05	upregulated	.	.	early growth response 1 [Source:RGD Symbol;Acc:2544]
Fosl2	chr6	241	32	119.608	63.7442	55.8638	1.87638	4.14979e-05	0.00906682	FDR<0.05	0.780657	medium	6.5384	1.42637	11.6504	0.79807	3.72033	8.16788	0.000198965	0.0234459	FDR<0.05	upregulated	.	Y	FOS like 2, AP-1 transcription factor subunit [Source:RGD Symbol;Acc:2628]
Ddit3	chr7	234	37	118.979	80.7518	38.2272	1.47339	4.26414e-05	0.00911414	FDR<0.05	0.717234	medium	32.6015	10.8823	54.3207	0.355247	6.54514	4.99164	5.94394e-11	4.35823e-08	FDR<0.05	upregulated	.	.	DNA-damage inducible transcript 3 [Source:RGD Symbol;Acc:62391]
Plk2	chr2	587	86	96.9239	67.8425	29.0814	1.42866	5.57565e-05	0.0116638	FDR<0.05	0.446687	small	83.0778	21.7588	144.397	0.306016	8.64623	6.63624	5.32307e-18	7.02539e-15	FDR<0.05	upregulated	.	.	polo-like kinase 2 [Source:RGD Symbol;Acc:620760]
Nefm	chr15	350	176	100.492	79.7369	20.755	1.26029	6.08573e-05	0.0124656	FDR<0.05	0.379304	small	27.8035	21.2252	34.3817	0.358339	1.91837	1.61985	0.0550646	0.999837	Not Sig	nonsignificant	.	.	neurofilament medium chain [Source:RGD Symbol;Acc:3160]
Lingo1	chr8	426	230	99.963	83.7219	16.241	1.19399	0.000153397	0.0307796	FDR<0.05	0.301971	small	46.3707	39.1253	53.6161	0.65208	0.716706	1.37037	0.473556	0.999837	Not Sig	nonsignificant	.	.	leucine rich repeat and Ig domain containing 1 [Source:RGD Symbol;Acc:1308668]
Enc1	chr2	1484	802	95.3288	88.2628	7.06595	1.08006	0.000194145	0.0381766	FDR<0.05	0.184065	negligible	205.425	168.151	242.698	0.156524	3.26534	1.44333	0.00109333	0.0913279	Not Sig	nonsignificant	.	Y	ectodermal-neural cortex 1 [Source:RGD Symbol;Acc:1303152]
Tubb4b	chr3	816	526	90.3351	79.7819	10.5532	1.13228	0.000201078	0.0387646	FDR<0.05	0.217402	small	175.129	162.068	188.19	0.150969	1.54852	1.16118	0.121496	0.999837	Not Sig	nonsignificant	.	.	tubulin, beta 4B class IVb [Source:RGD Symbol;Acc:735101]
Spns2	chr10	117	58	137.585	90.7366	46.848	1.51631	0.000217559	0.0411354	FDR<0.05	0.628539	medium	17.3193	15.6478	18.9908	0.386828	0.848172	1.21364	0.396342	0.999837	Not Sig	nonsignificant	.	.	SPNS lysolipid transporter 2, sphingosine-1-phosphate [Source:RGD Symbol;Acc:2303312]
Hsp90aa1	chr6	1661	1131	104.939	96.9561	7.98309	1.08234	0.000242817	0.0450448	FDR<0.05	0.15235	negligible	404.9	365.759	444.041	0.13375	1.96308	1.21403	0.0496374	0.999837	Not Sig	nonsignificant	.	.	heat shock protein 90 alpha family class A member 1 [Source:RGD Symbol;Acc:631409]
Zfp106	chr3	204	143	65.5559	89.0419	-23.486	0.736237	0.000254082	0.0462617	FDR<0.05	-0.357144	small	19.7189	19.5188	19.919	0.358218	0.105869	1.0205	0.915686	0.999837	Not Sig	nonsignificant	.	.	zinc finger protein 106 [Source:RGD Symbol;Acc:1593644]
ND3	chrM	4123	5118	47.0417	47.9465	-0.904881	0.981127	0.000312012	0.0547805	NotSig	-0.0200586	negligible	1542.46	1825.04	1259.89	0.184778	-2.90334	0.690336	0.00369207	0.248612	Not Sig	nonsignificant	.	.	mitochondrially encoded NADH:ubiquinone oxidoreductase core subunit 3 [Source:RGD Symbol;Acc:620557]
Fscn1	chr12	455	222	114.706	95.1891	19.5167	1.20503	0.000362681	0.0614807	NotSig	0.294763	small	75.3977	57.7229	93.0724	0.214649	3.22195	1.6124	0.0012732	0.0976957	Not Sig	nonsignificant	.	Y	fascin actin-bundling protein 1 [Source:RGD Symbol;Acc:1583309]
Casd1	chr4	75	67	85.0592	121.773	-36.7138	0.698506	0.00035732	0.0614807	NotSig	-0.56702	medium	16.9565	15.7867	18.1263	0.397545	0.291276	1.1482	0.77084	0.999837	Not Sig	nonsignificant	.	Y	CAS1 domain containing 1 [Source:RGD Symbol;Acc:1596912]
Lrrc57	chr3	42	44	63.6954	113.49	-49.7949	0.561241	0.000389748	0.0649493	NotSig	-0.797472	medium	11.2361	13.2487	9.22353	0.441827	-1.12293	0.696185	0.261466	0.999837	Not Sig	nonsignificant	Y	Y	leucine rich repeat containing 57 [Source:RGD Symbol;Acc:1307128]
Hnrnpu	chr13	418	282	109.665	87.9777	21.6873	1.24651	0.00040664	0.0666347	NotSig	0.267285	small	77.2567	73.4526	81.0609	0.201801	0.66514	1.10358	0.505961	0.999837	Not Sig	nonsignificant	.	Y	heterogeneous nuclear ribonucleoprotein U [Source:RGD Symbol;Acc:620372]
Slc17a7	chr1	3134	2434	93.283	99.1086	-5.82558	0.94122	0.000424505	0.0684219	NotSig	-0.103238	negligible	573.576	563.511	583.642	0.124639	0.303354	1.03572	0.76162	0.999837	Not Sig	nonsignificant	.	.	solute carrier family 17 member 7 [Source:RGD Symbol;Acc:620101]
Mapk4	chr18	157	29	109.356	66.4262	42.9302	1.64628	0.000434968	0.0689776	NotSig	0.654712	medium	11.4272	4.06284	18.7916	1.06839	1.94916	4.62523	0.0512757	0.999837	Not Sig	nonsignificant	.	.	mitogen-activated protein kinase 4 [Source:RGD Symbol;Acc:3047]
Caly	chr1	867	692	80.6352	89.5058	-8.8706	0.900894	0.000564814	0.0867696	NotSig	-0.147818	negligible	204.297	201.748	206.845	0.14993	0.242307	1.02527	0.808543	0.999837	Not Sig	nonsignificant	.	.	calcyon neuron-specific vesicular protein [Source:RGD Symbol;Acc:621719]
Btbd1	chr1	234	222	76.6685	98.4922	-21.8237	0.778422	0.000616056	0.0917736	NotSig	-0.333345	small	46.647	48.7921	44.5019	0.246901	-0.636058	0.912073	0.524739	0.999837	Not Sig	nonsignificant	.	Y	BTB domain containing 1 [Source:RGD Symbol;Acc:1310962]
LOC100125362	chr8	269	141	93.0753	75.035	18.0404	1.24043	0.000612999	0.0917736	NotSig	0.371437	small	11.3692	10.9734	11.765	0.488444	0.117745	1.07214	0.906269	0.999837	Not Sig	nonsignificant	Y	Y	expressed sequence AI593442 [Source:MGI Symbol;Acc:MGI:2143099]
Jund	chr16	742	250	99.9907	87.8769	12.1138	1.13785	0.000641401	0.0941232	NotSig	0.237998	small	56.5903	29.03	84.1506	0.739876	2.0414	2.89874	0.0412108	0.999837	Not Sig	nonsignificant	.	.	JunD proto-oncogene, AP-1 transcription factor subunit [Source:RGD Symbol;Acc:2945]
Ap3s1	chr18	125	114	121.14	87.6241	33.5158	1.38249	0.000724187	0.102879	NotSig	0.516794	medium	31.8612	34.3105	29.4119	0.270233	-0.873851	0.857225	0.382199	0.999837	Not Sig	nonsignificant	.	Y	adaptor related protein complex 3 subunit sigma 1 [Source:RGD Symbol;Acc:1311115]
Klf10	chr7	92	40	111.526	70.7207	40.8049	1.57699	0.000732461	0.102879	NotSig	0.65606	medium	15.4329	11.7434	19.1224	0.491868	1.39001	1.62835	0.164525	0.999837	Not Sig	nonsignificant	.	.	KLF transcription factor 10 [Source:RGD Symbol;Acc:621652]
Ywhaz	chr7	2507	1870	105.712	99.5172	6.19472	1.06225	0.000755293	0.104592	NotSig	0.107337	negligible	429.135	404.919	453.352	0.140269	1.02444	1.11961	0.305627	0.999837	Not Sig	nonsignificant	.	.	tyrosine 3-monooxygenase/tryptophan 5-monooxygenase activation protein, zeta [Source:RGD Symbol;Acc:3980]
Ndufa3	chr1	546	399	71.6464	83.3783	-11.7319	0.859293	0.000806765	0.108659	NotSig	-0.214971	small	115.038	119.801	110.275	0.174584	-0.498476	0.920486	0.618148	0.999837	Not Sig	nonsignificant	.	.	NADH:ubiquinone oxidoreductase subunit A3 [Source:RGD Symbol;Acc:1588687]
Nptx2	chr12	470	69	125.671	101.001	24.6703	1.24426	0.000867624	0.11374	NotSig	0.406748	small	40.0969	11.2294	68.9643	0.73647	3.58018	6.14143	0.000343358	0.0348588	FDR<0.05	upregulated	.	.	neuronal pentraxin 2 [Source:RGD Symbol;Acc:1309447]
Zc3h18	chr19	41	32	61.9203	119.003	-57.0825	0.520327	0.000903772	0.11692	NotSig	-0.831861	large	9.97976	11.1236	8.83591	0.592269	-0.206528	0.794338	0.836379	0.999837	Not Sig	nonsignificant	.	.	zinc finger CCCH-type containing 18 [Source:RGD Symbol;Acc:1303257]
Selenoo	chr7	31	37	102.197	176.433	-74.2361	0.57924	0.000924206	0.11801	NotSig	-0.843789	large	9.07628	11.1949	6.95761	0.526714	-1.25555	0.621496	0.209281	0.999837	Not Sig	nonsignificant	.	.	selenoprotein O [Source:RGD Symbol;Acc:1311907]
Baiap2	chr10	717	256	108.443	93.1316	15.3111	1.1644	0.000954238	0.120283	NotSig	0.221813	small	87.6303	50.0734	125.187	0.492689	2.68502	2.50007	0.00725247	0.405585	Not Sig	nonsignificant	.	.	BAR/IMD domain containing adaptor protein 2 [Source:RGD Symbol;Acc:619814]
Hapln4	chr16	473	367	124.622	135.556	-10.9335	0.919343	0.000977729	0.121684	NotSig	-0.188446	negligible	39.2033	38.045	40.3616	0.304158	0.20238	1.06089	0.83962	0.999837	Not Sig	nonsignificant	.	.	hyaluronan and proteoglycan link protein 4 [Source:RGD Symbol;Acc:1308408]
Dynll2	chr10	629	478	90.7543	80.3404	10.4139	1.12962	0.00104793	0.12879	NotSig	0.185533	negligible	42.9357	41.4359	44.4356	0.259378	0.414321	1.07239	0.678639	0.999837	Not Sig	nonsignificant	.	.	dynein light chain LC8-type 2 [Source:RGD Symbol;Acc:619860]
Cry2	chr3	165	88	115.623	84.1395	31.4833	1.37418	0.00108082	0.129998	NotSig	0.439987	small	29.237	23.2177	35.2563	0.34483	1.68431	1.51851	0.0921216	0.999837	Not Sig	nonsignificant	.	.	cryptochrome circadian regulator 2 [Source:RGD Symbol;Acc:620935]
Pfdn4	chr3	62	68	104.881	69.7554	35.1255	1.50355	0.0010842	0.129998	NotSig	0.603302	medium	17.2219	20.6498	13.794	0.388425	-1.52656	0.667996	0.12687	0.999837	Not Sig	nonsignificant	.	.	prefoldin subunit 4 [Source:RGD Symbol;Acc:2324021]
Ipo4	chr15	92	62	77.4232	116.304	-38.8803	0.6657	0.00113323	0.133402	NotSig	-0.49398	small	21.0572	20.5952	21.5193	0.353215	0.381051	1.04487	0.703166	0.999837	Not Sig	nonsignificant	.	.	importin 4 [Source:RGD Symbol;Acc:1305206]
Tmsb4x	chrX	6087	3912	88.6381	84.9651	3.67295	1.04323	0.00113972	0.133402	NotSig	0.0779521	negligible	1347.88	1201.09	1494.66	0.109672	2.8839	1.24442	0.00392786	0.25176	Not Sig	nonsignificant	.	.	thymosin beta 4, X-linked [Source:RGD Symbol;Acc:621622]
Lztfl1	chr8	27	25	45.7725	127.824	-82.0519	0.358089	0.00122601	0.141813	NotSig	-0.94626	large	8.42995	10.8277	6.03223	0.535437	-1.31483	0.557112	0.188566	0.999837	Not Sig	nonsignificant	.	Y	leucine zipper transcription factor-like 1 [Source:RGD Symbol;Acc:1306628]
Bax	chr1	72	61	94.3226	128.234	-33.9115	0.73555	0.00129324	0.147851	NotSig	-0.511755	medium	17.5875	17.8101	17.3648	0.361966	-0.0836114	0.975001	0.933365	0.999837	Not Sig	nonsignificant	.	Y	BCL2 associated X, apoptosis regulator [Source:RGD Symbol;Acc:2192]
Snap47	chr10	93	53	74.8755	114.687	-39.8117	0.652867	0.00138966	0.151277	NotSig	-0.562068	medium	18.7223	14.1342	23.3104	0.360117	1.87502	1.64922	0.0607906	0.999837	Not Sig	nonsignificant	.	.	synaptosome associated protein 47 [Source:RGD Symbol;Acc:735194]
Ttc39c	chr18	41	34	138.037	71.9798	66.0569	1.91771	0.00138221	0.151277	NotSig	0.739219	medium	8.63171	10.0071	7.25632	0.537921	-0.751299	0.725118	0.452473	0.999837	Not Sig	nonsignificant	.	.	tetratricopeptide repeat domain 39C [Source:RGD Symbol;Acc:1585423]
Atat1	chr20	91	76	85.5739	110.13	-24.5561	0.777026	0.00139971	0.151277	NotSig	-0.550684	medium	22.1721	24.2149	20.1292	0.349406	-0.485369	0.831274	0.627415	0.999837	Not Sig	nonsignificant	.	.	alpha tubulin acetyltransferase 1 [Source:RGD Symbol;Acc:1303066]
Brd2	chr20	310	137	107.8	82.257	25.5432	1.31053	0.00140031	0.151277	NotSig	0.319855	small	53.9283	39.2979	68.5587	0.233601	3.21429	1.74459	0.00130769	0.099189	Not Sig	nonsignificant	.	.	bromodomain containing 2 [Source:RGD Symbol;Acc:1303324]
Ifrd1	chr6	394	75	144.209	113.875	30.3341	1.26638	0.00143092	0.151277	NotSig	0.389901	small	61.8194	21.365	102.274	0.49291	4.47993	4.78699	7.46691e-06	0.00136873	FDR<0.05	upregulated	.	.	interferon-related developmental regulator 1 [Source:RGD Symbol;Acc:2867]
Uqcrb	chr7	637	426	72.9415	83.4594	-10.5179	0.873976	0.00142183	0.151277	NotSig	-0.237216	small	7.17247	7.26274	7.08219	0.583722	-0.164651	0.97514	0.869219	0.999837	Not Sig	nonsignificant	.	.	ubiquinol-cytochrome c reductase binding protein [Source:RGD Symbol;Acc:1311971]
Armc8	chr8	79	63	78.0107	124.932	-46.9215	0.624424	0.00135996	0.151277	NotSig	-0.45691	small	8.42371	8.96348	7.88395	0.576144	-0.400811	0.879563	0.688559	0.999837	Not Sig	nonsignificant	.	Y	armadillo repeat containing 8 [Source:RGD Symbol;Acc:1310477]
Pdlim7	chr17	149	123	93.381	116.996	-23.615	0.798155	0.00147107	0.153868	NotSig	-0.415519	small	36.7158	39.7312	33.7004	0.312128	-0.596692	0.848209	0.550713	0.999837	Not Sig	nonsignificant	.	.	PDZ and LIM domain 7 [Source:RGD Symbol;Acc:628769]
Timm10	chr3	94	71	69.2011	96.5088	-27.3077	0.717045	0.00150122	0.155369	NotSig	-0.438127	small	21.1139	21.8424	20.3855	0.334664	-0.0784452	0.9333	0.937474	0.999837	Not Sig	nonsignificant	.	.	translocase of inner mitochondrial membrane 10 [Source:RGD Symbol;Acc:621741]
Rpl21	chr12	1403	1055	61.2083	66.5967	-5.38844	0.919088	0.00155863	0.157984	NotSig	-0.134622	negligible	71.5252	73.0161	70.0344	0.226957	-0.33514	0.959164	0.73752	0.999837	Not Sig	nonsignificant	.	Y	ribosomal protein L21 [Source:RGD Symbol;Acc:68390]
Slc30a9	chr14	198	144	120.128	92.8547	27.2731	1.29372	0.00155757	0.157984	NotSig	0.305496	small	39.1662	39.1645	39.168	0.25606	-0.114003	1.00009	0.909236	0.999837	Not Sig	nonsignificant	Y	Y	solute carrier family 30 member 9 [Source:RGD Symbol;Acc:1593180]
Prdx5	chr1	493	295	96.5573	84.0421	12.5152	1.14892	0.00158913	0.158511	NotSig	0.25306	small	105.734	92.6155	118.852	0.18519	1.8156	1.28329	0.0694325	0.999837	Not Sig	nonsignificant	.	.	peroxiredoxin 5 [Source:RGD Symbol;Acc:71007]
Hdlbp	chr9	170	135	82.0999	105.721	-23.6216	0.776568	0.0016122	0.158511	NotSig	-0.35307	small	28.8492	28.1072	29.5912	0.298192	0.250911	1.0528	0.801883	0.999837	Not Sig	nonsignificant	.	.	high density lipoprotein binding protein [Source:RGD Symbol;Acc:620962]
Rev1	chr9	26	24	188.757	85.7031	103.054	2.20246	0.00160022	0.158511	NotSig	0.963265	large	6.83312	7.60885	6.05739	0.58368	-0.574077	0.796098	0.565916	0.999837	Not Sig	nonsignificant	.	Y	REV1, DNA directed polymerase [Source:RGD Symbol;Acc:1306715]
Aarsd1	chr10	118	77	64.9238	90.474	-25.5502	0.717596	0.00168306	0.162977	NotSig	-0.433757	small	23.7679	21.5041	26.0318	0.311392	0.870661	1.21055	0.383939	0.999837	Not Sig	nonsignificant	.	Y	alanyl-tRNA synthetase domain containing 1 [Source:RGD Symbol;Acc:1561650]
Cc2d1a	chr19	61	41	82.4679	135.319	-52.8511	0.609433	0.00169077	0.162977	NotSig	-0.604272	medium	13.6795	14.5703	12.7886	0.441553	-0.339769	0.877717	0.73403	0.999837	Not Sig	nonsignificant	.	.	coiled-coil and C2 domain containing 1A [Source:RGD Symbol;Acc:1306108]
Hspa4	chr10	265	184	119.774	90.4763	29.2972	1.32381	0.00171478	0.163686	NotSig	0.319656	small	49.0513	44.8744	53.2281	0.237564	0.820054	1.18616	0.412185	0.999837	Not Sig	nonsignificant	.	.	heat shock protein family A (Hsp70) member 4 [Source:RGD Symbol;Acc:628878]
Crym	chr1	547	516	76.4644	87.6499	-11.1855	0.872384	0.00178573	0.165635	NotSig	-0.205355	small	142.04	152.347	131.733	0.15866	-1.35054	0.864689	0.176843	0.999837	Not Sig	nonsignificant	.	.	crystallin, mu [Source:RGD Symbol;Acc:620943]
LOC103693430	chr10	52	38	58.7458	86.818	-28.0721	0.676656	0.0017531	0.165635	NotSig	-0.554372	medium	18.4541	19.6761	17.2321	0.360008	-0.459634	0.875788	0.645779	0.999837	Not Sig	nonsignificant	.	.
C2cd5	chr4	45	41	153.981	80.2898	73.6909	1.91781	0.00177374	0.165635	NotSig	0.696624	medium	8.9035	9.51499	8.29201	0.578799	-0.470371	0.871468	0.63809	0.999837	Not Sig	nonsignificant	.	.	C2 calcium-dependent domain containing 5 [Source:RGD Symbol;Acc:1304592]
Homer1	chr2	203	52	140.757	106.011	34.7467	1.32777	0.00184193	0.169251	NotSig	0.500774	medium	13.4783	11.87	15.0867	0.443355	0.650785	1.271	0.515186	0.999837	Not Sig	nonsignificant	Y	Y	homer scaffold protein 1 [Source:RGD Symbol;Acc:628725]
Ap2s1	chr1	485	374	93.8774	103.996	-10.119	0.902699	0.0018713	0.170079	NotSig	-0.224584	small	111.103	107.071	115.135	0.188313	0.401521	1.07531	0.688037	0.999837	Not Sig	nonsignificant	.	.	adaptor related protein complex 2 subunit sigma 1 [Source:RGD Symbol;Acc:620188]
Arl5b	chr17	123	21	146.891	80.3219	66.5689	1.82878	0.00188554	0.170079	NotSig	0.751857	medium	6.26627	1.23168	11.3009	0.926813	3.1558	9.17518	0.00160057	0.117357	Not Sig	nonsignificant	.	Y	ADP-ribosylation factor like GTPase 5B [Source:RGD Symbol;Acc:1305569]
Sh3bgrl3	chr5	342	305	91.4571	102.491	-11.0334	0.892347	0.00195367	0.174622	NotSig	-0.264538	small	89.6564	94.3325	84.9802	0.177902	-0.769319	0.900858	0.441704	0.999837	Not Sig	nonsignificant	.	.	SH3 domain binding glutamate-rich protein like 3 [Source:RGD Symbol;Acc:1308118]
Pcyox1l	chr18	35	33	75.0651	115.908	-40.8434	0.647624	0.00202505	0.17777	NotSig	-0.611019	medium	8.34468	8.25195	8.4374	0.515566	-0.0942585	1.02247	0.924904	0.999837	Not Sig	nonsignificant	.	.	prenylcysteine oxidase 1 like [Source:RGD Symbol;Acc:1563290]
Dctn3	chr5	299	201	89.3859	103.368	-13.982	0.864736	0.00226753	0.195565	NotSig	-0.260487	small	62.3714	57.6845	67.0584	0.218657	0.941948	1.1625	0.346219	0.999837	Not Sig	nonsignificant	.	.	dynactin subunit 3 [Source:RGD Symbol;Acc:1309547]
Nrgn	chr8	4282	3050	118.992	123.202	-4.20986	0.96583	0.00230258	0.196829	NotSig	-0.0754987	negligible	386.611	373.265	399.956	0.138757	0.787693	1.07151	0.430876	0.999837	Not Sig	nonsignificant	.	.	neurogranin [Source:RGD Symbol;Acc:61833]
Apoc1	chr1	75	52	68.6768	87.9502	-19.2734	0.78086	0.00236396	0.197498	NotSig	-0.547834	medium	16.036	15.8877	16.1843	0.378964	0.0544739	1.01867	0.956558	0.999837	Not Sig	nonsignificant	.	.	apolipoprotein C1 [Source:RGD Symbol;Acc:2134]
Bgn	chrX	31	20	76.1498	106.827	-30.6767	0.712836	0.00237029	0.197498	NotSig	-0.934177	large	6.30655	8.35546	4.25764	0.756984	-0.916777	0.509563	0.35926	0.999837	Not Sig	nonsignificant	.	.	biglycan [Source:RGD Symbol;Acc:2207]
Mrps35	chr4	53	42	78.387	107.699	-29.3123	0.727832	0.00240429	0.198647	NotSig	-0.743475	medium	13.6651	13.486	13.8443	0.427439	-0.0971331	1.02657	0.922621	0.999837	Not Sig	nonsignificant	.	.	mitochondrial ribosomal protein S35 [Source:RGD Symbol;Acc:1306720]
Ypel3	chr1	529	414	104.243	117.411	-13.1678	0.887849	0.00253669	0.203049	NotSig	-0.216418	small	123.34	121.077	125.603	0.16093	0.214393	1.03739	0.830241	0.999837	Not Sig	nonsignificant	.	.	yippee-like 3 [Source:RGD Symbol;Acc:1564579]
Ppp4c	chr1	60	45	80.1347	114.707	-34.5724	0.698603	0.00260213	0.203049	NotSig	-0.660199	medium	14.5494	14.816	14.2828	0.430576	0.125876	0.964009	0.89983	0.999837	Not Sig	nonsignificant	.	.	protein phosphatase 4, catalytic subunit [Source:RGD Symbol;Acc:621225]
Nek7	chr13	115	87	104.177	78.2405	25.9367	1.3315	0.0025868	0.203049	NotSig	0.416686	small	16.8704	16.383	17.3577	0.384303	0.0462473	1.05949	0.963113	0.999837	Not Sig	nonsignificant	Y	Y	NIMA-related kinase 7 [Source:RGD Symbol;Acc:1311160]
Lrrc4	chr4	102	81	87.3192	56.8508	30.4684	1.53594	0.00251241	0.203049	NotSig	0.451006	small	9.00411	6.92167	11.0865	0.504946	1.17194	1.60172	0.241221	0.999837	Not Sig	nonsignificant	Y	Y	leucine rich repeat containing 4 [Source:RGD Symbol;Acc:1560026]
Hnrnpa2b1	chr4	644	441	107.226	94.5425	12.6833	1.13415	0.00248194	0.203049	NotSig	0.200346	small	143.32	133.978	152.662	0.173301	0.975492	1.13946	0.329316	0.999837	Not Sig	nonsignificant	.	Y	heterogeneous nuclear ribonucleoprotein A2/B1 [Source:RGD Symbol;Acc:1310403]
Tle5	chr7	1558	1228	77.3685	82.9745	-5.60606	0.932436	0.00259368	0.203049	NotSig	-0.110496	negligible	326.06	319.36	332.76	0.124472	0.420965	1.04196	0.673781	0.999837	Not Sig	nonsignificant	.	.	TLE family member 5, transcriptional modulator [Source:RGD Symbol;Acc:2731]
Kdm5d	chrY	25	23	172.447	81.6343	90.8126	2.11243	0.00267394	0.207009	NotSig	0.932548	large	6.86557	8.09273	5.63841	0.581579	-0.805253	0.696726	0.420673	0.999837	Not Sig	nonsignificant	.	Y	lysine demethylase 5D [Source:RGD Symbol;Acc:2314436]
Myl6	chr7	950	593	92.5215	83.9704	8.55107	1.10183	0.00273311	0.209937	NotSig	0.157697	negligible	198.712	179.29	218.135	0.147278	2.01953	1.21666	0.0434322	0.999837	Not Sig	nonsignificant	.	.	myosin light chain 6 [Source:RGD Symbol;Acc:1589019]
Hsph1	chr12	443	293	94.501	82.0198	12.4812	1.15217	0.00278786	0.212482	NotSig	0.254355	small	90.3847	78.486	102.283	0.227295	1.46229	1.30321	0.143661	0.999837	Not Sig	nonsignificant	.	.	heat shock protein family H (Hsp110) member 1 [Source:RGD Symbol;Acc:1311609]
Dock3	chr8	62	90	140.227	102.791	37.4365	1.3642	0.00296545	0.224279	NotSig	0.543107	medium	11.3714	14.5676	8.17516	0.465718	-1.59803	0.561189	0.110037	0.999837	Not Sig	nonsignificant	Y	.	dedicator of cyto-kinesis 3 [Source:RGD Symbol;Acc:1306677]
Bdnf	chr3	298	45	104.829	70.4645	34.3643	1.48768	0.00303963	0.228135	NotSig	0.471642	small	12.6965	1.21871	24.1744	1.1944	3.31779	19.836	0.00090734	0.0777602	Not Sig	nonsignificant	Y	.	brain-derived neurotrophic factor [Source:RGD Symbol;Acc:2202]
Rtraf	chr15	170	143	90.9493	116.402	-25.4526	0.781339	0.00307301	0.228893	NotSig	-0.289346	small	42.7502	42.7686	42.7319	0.253319	0.0217571	0.999143	0.982642	0.999837	Not Sig	nonsignificant	.	.	RNA transcription, translation and transport factor [Source:RGD Symbol;Acc:1304704]
Kras	chr4	61	36	130	74.3761	55.6243	1.74788	0.00310387	0.229453	NotSig	0.615607	medium	7.20157	5.69355	8.70958	0.605212	1.02514	1.52973	0.305295	0.999837	Not Sig	nonsignificant	.	Y
Strn4	chr1	291	236	78.412	96.8791	-18.467	0.80938	0.00329753	0.237059	NotSig	-0.253004	small	72.61	70.0511	75.1688	0.201813	0.301692	1.07306	0.762887	0.999837	Not Sig	nonsignificant	.	.	striatin 4 [Source:RGD Symbol;Acc:1307030]
Cadm3	chr13	313	254	88.5177	103.641	-15.1234	0.854079	0.00323095	0.237059	NotSig	-0.266527	small	62.5623	66.3324	58.7921	0.204412	-0.842049	0.886325	0.39976	0.999837	Not Sig	nonsignificant	.	Y	cell adhesion molecule 3 [Source:RGD Symbol;Acc:1307035]
Pip4k2a	chr17	79	54	98.9309	68.2783	30.6526	1.44894	0.0032646	0.237059	NotSig	0.484243	small	12.0639	10.3664	13.7614	0.456182	0.809446	1.3275	0.418259	0.999837	Not Sig	nonsignificant	.	.	phosphatidylinositol-5-phosphate 4-kinase type 2 alpha [Source:RGD Symbol;Acc:621708]
Pltp	chr3	138	119	82.5681	99.0554	-16.4873	0.833555	0.00335142	0.237059	NotSig	-0.348103	small	38.476	40.0209	36.9311	0.307086	-0.237958	0.922795	0.811914	0.999837	Not Sig	nonsignificant	.	.	phospholipid transfer protein [Source:RGD Symbol;Acc:1306695]
Arf3	chr7	1812	1526	94.7818	100.822	-6.04	0.940092	0.00333874	0.237059	NotSig	-0.104037	negligible	200.575	199.109	202.04	0.199809	-0.0556018	1.01472	0.955659	0.999837	Not Sig	nonsignificant	.	.	ADP-ribosylation factor 3 [Source:RGD Symbol;Acc:621273]
Baz1b	chr12	57	55	136.496	86.0469	50.4494	1.5863	0.00332033	0.237059	NotSig	0.604307	medium	7.30595	8.3283	6.28361	0.584643	-0.68802	0.754488	0.49144	0.999837	Not Sig	nonsignificant	.	Y	bromodomain adjacent to zinc finger domain, 1B [Source:RGD Symbol;Acc:1597089]
Naa30	chr15	67	42	77.0283	112.238	-35.21	0.686292	0.0034269	0.237588	NotSig	-0.619919	medium	7.21034	6.61103	7.80965	0.575674	0.301568	1.18131	0.762981	0.999837	Not Sig	nonsignificant	.	.	N(alpha)-acetyltransferase 30, NatC catalytic subunit [Source:RGD Symbol;Acc:1559923]
Snrpf	chr7	133	99	61.3935	86.822	-25.4285	0.70712	0.00343139	0.237588	NotSig	-0.354756	small	16.9568	19.5859	14.3278	0.418669	-0.967368	0.731535	0.33336	0.999837	Not Sig	nonsignificant	.	Y	small nuclear ribonucleoprotein polypeptide F [Source:RGD Symbol;Acc:1588229]
Sac3d1	chr1	23	23	70.7589	120.753	-49.9942	0.58598	0.00346997	0.238579	NotSig	-0.916839	large	6.86638	8.88896	4.8438	0.58256	-1.28317	0.544923	0.199431	0.999837	Not Sig	nonsignificant	.	.	SAC3 domain containing 1 [Source:RGD Symbol;Acc:1308049]
Pik3c3	chr18	42	37	69.3951	113.313	-43.9179	0.61242	0.00374948	0.25196	NotSig	-0.711363	medium	8.65584	9.4803	7.83137	0.540996	-0.459138	0.826068	0.646135	0.999837	Not Sig	nonsignificant	Y	Y	phosphatidylinositol 3-kinase, catalytic subunit type 3 [Source:RGD Symbol;Acc:620899]
Ppp1r1a	chr7	378	276	88.5884	75.799	12.7894	1.16873	0.00379272	0.25196	NotSig	0.277301	small	82.2948	77.4269	87.1626	0.209962	0.77371	1.12574	0.439102	0.999837	Not Sig	nonsignificant	Y	.	protein phosphatase 1, regulatory (inhibitor) subunit 1A [Source:RGD Symbol;Acc:62018]
Scg2	chr9	676	441	91.1122	80.9294	10.1828	1.12582	0.00377635	0.25196	NotSig	0.221039	small	133.786	115.946	151.626	0.208041	1.77203	1.30773	0.0763897	0.999837	Not Sig	nonsignificant	.	.	secretogranin II [Source:RGD Symbol;Acc:3626]
Susd4	chr13	133	111	76.8832	102.478	-25.5945	0.750243	0.00392195	0.258796	NotSig	-0.338258	small	27.7686	27.5187	28.0185	0.294231	0.102071	1.01816	0.9187	0.999837	Not Sig	nonsignificant	.	.	sushi domain containing 4 [Source:RGD Symbol;Acc:1564043]
Mtch1	chr20	1040	733	86.8423	93.1662	-6.32394	0.932122	0.00408682	0.267878	NotSig	-0.111834	negligible	228.016	218.544	237.487	0.13635	0.872911	1.08668	0.382711	0.999837	Not Sig	nonsignificant	.	.	mitochondrial carrier 1 [Source:RGD Symbol;Acc:1309262]
Prdx4	chrX	47	34	59.0285	90.0052	-30.9768	0.655834	0.00427422	0.276475	NotSig	-0.593963	medium	10.6218	10.7474	10.4962	0.496087	-0.016432	0.976619	0.98689	0.999837	Not Sig	nonsignificant	.	.	peroxiredoxin 4 [Source:RGD Symbol;Acc:620043]
Kctd3	chr13	80	61	85.8501	129.863	-44.013	0.661082	0.00442006	0.284039	NotSig	-0.480528	small	12.8405	10.9567	14.7242	0.440977	0.720093	1.34385	0.471468	0.999837	Not Sig	nonsignificant	.	.	potassium channel tetramerization domain containing 3 [Source:RGD Symbol;Acc:1310658]
Apmap	chr3	55	42	82.0262	119.811	-37.7847	0.68463	0.00446583	0.284299	NotSig	-0.631907	medium	11.9915	12.712	11.271	0.442035	-0.265972	0.886641	0.790261	0.999837	Not Sig	nonsignificant	.	.	adipocyte plasma membrane associated protein [Source:RGD Symbol;Acc:1308874]
Rab7a	chr4	473	373	72.1399	84.7171	-12.5773	0.851538	0.00450444	0.284299	NotSig	-0.22022	small	113.082	112.649	113.515	0.176357	-0.0926613	1.00769	0.926173	0.999837	Not Sig	nonsignificant	.	Y	RAB7A, member RAS oncogene family [Source:RGD Symbol;Acc:61908]
Osbpl1a	chr18	157	135	115.215	92.2254	22.9899	1.24928	0.00457059	0.28541	NotSig	0.347913	small	37.0407	38.5813	35.5001	0.257535	-0.56652	0.920137	0.57104	0.999837	Not Sig	nonsignificant	.	Y	oxysterol binding protein-like 1A [Source:RGD Symbol;Acc:628888]
Slc25a4	chr16	1634	1177	84.8164	79.0134	5.80303	1.07344	0.00466324	0.287834	NotSig	0.117358	negligible	375.71	361.486	389.933	0.122054	0.940371	1.0787	0.347027	0.999837	Not Sig	nonsignificant	.	Y	solute carrier family 25 member 4 [Source:RGD Symbol;Acc:620352]
Pianp	chr4	107	102	68.2884	96.7996	-28.5112	0.705462	0.00471331	0.287834	NotSig	-0.443593	small	27.2879	30.4865	24.0892	0.305253	-0.934351	0.790162	0.350123	0.999837	Not Sig	nonsignificant	.	Y	PILR alpha associated neural protein [Source:RGD Symbol;Acc:1304952]
Zbtb11	chr11	57	39	106.838	70.1715	36.6664	1.52253	0.0046919	0.287834	NotSig	0.552141	medium	9.07674	7.4176	10.7359	0.513363	0.981739	1.44735	0.326229	0.999837	Not Sig	nonsignificant	.	.	zinc finger and BTB domain containing 11 [Source:RGD Symbol;Acc:1308275]
Numbl	chr1	172	83	110.704	82.6854	28.019	1.33886	0.00482181	0.292642	NotSig	0.371764	small	24.4751	18.7092	30.2411	0.357047	2.00529	1.61638	0.044932	0.999837	Not Sig	nonsignificant	.	Y	NUMB-like, endocytic adaptor protein [Source:RGD Symbol;Acc:1307579]
Ttc17	chr3	43	31	90.4844	144.285	-53.8004	0.627124	0.00503293	0.30173	NotSig	-0.631392	medium	9.19337	9.84442	8.54232	0.539897	-0.0459896	0.867732	0.963319	0.999837	Not Sig	nonsignificant	.	.	tetratricopeptide repeat domain 17 [Source:RGD Symbol;Acc:1305410]
Mapk3	chr1	311	280	83.403	97.2503	-13.8473	0.857612	0.00511242	0.303642	NotSig	-0.274828	small	81.5258	88.6669	74.3848	0.194123	-1.19268	0.838924	0.232994	0.999837	Not Sig	nonsignificant	.	.	mitogen activated protein kinase 3 [Source:RGD Symbol;Acc:3046]
Wdr11	chr1	50	42	78.9998	119.232	-40.2322	0.662572	0.00519368	0.303642	NotSig	-0.654979	medium	12.421	13.5331	11.3088	0.465423	-0.209134	0.835639	0.834344	0.999837	Not Sig	nonsignificant	.	Y	WD repeat domain 11 [Source:RGD Symbol;Acc:1587347]
Klf9	chr1	283	156	106.029	81.6217	24.407	1.29903	0.00513362	0.303642	NotSig	0.265363	small	18.2894	13.3526	23.2262	0.373116	1.99463	1.73946	0.0460835	0.999837	Not Sig	nonsignificant	.	Y	KLF transcription factor 9 [Source:RGD Symbol;Acc:70934]
Jun	chr5	950	140	98.955	80.6309	18.3241	1.22726	0.00525511	0.303931	NotSig	0.233738	small	58.9487	16.3014	101.596	0.310019	8.44633	6.23235	3.00602e-17	3.30612e-14	FDR<0.05	upregulated	.	Y	Jun proto-oncogene, AP-1 transcription factor subunit [Source:RGD Symbol;Acc:2943]
Btbd3	chr3	355	191	95.0834	80.0114	15.072	1.18837	0.00536791	0.308639	NotSig	0.291091	small	36.5553	28.2019	44.9086	0.288741	2.17185	1.5924	0.0298671	0.999837	Not Sig	nonsignificant	.	Y	BTB domain containing 3 [Source:RGD Symbol;Acc:1311623]
Paqr4	chr10	94	86	81.2323	105.558	-24.3255	0.769553	0.00554116	0.312072	NotSig	-0.405778	small	19.7772	19.1888	20.3656	0.361343	0.323365	1.06132	0.746419	0.999837	Not Sig	nonsignificant	.	.	progestin and adipoQ receptor family member 4 [Source:RGD Symbol;Acc:1309533]
Zcchc12	chrX	436	286	122.265	112.01	10.2554	1.09156	0.00550212	0.312072	NotSig	0.212792	small	67.604	58.9683	76.2397	0.254154	1.35421	1.29289	0.175671	0.999837	Not Sig	nonsignificant	.	.	zinc finger CCHC-type containing 12 [Source:RGD Symbol;Acc:1359439]
Rac1	chr12	368	298	92.303	79.5222	12.7808	1.16072	0.00561046	0.31342	NotSig	0.181808	negligible	12.1107	14.1853	10.036	0.477385	-1.01146	0.707495	0.311797	0.999837	Not Sig	nonsignificant	.	.	Rac family small GTPase 1 [Source:RGD Symbol;Acc:619755]
Clstn1	chr5	993	783	100.627	109.656	-9.02911	0.91766	0.00565341	0.314036	NotSig	-0.150348	negligible	175.098	174.176	176.02	0.196191	0.13871	1.01059	0.889679	0.999837	Not Sig	nonsignificant	.	Y	calsyntenin 1 [Source:RGD Symbol;Acc:1306458]
Cfl1	chr1	2559	1789	103.088	99.4951	3.59287	1.03611	0.0057286	0.314657	NotSig	0.101517	negligible	595.506	560.513	630.499	0.116819	1.45861	1.12486	0.144673	0.999837	Not Sig	nonsignificant	.	.	cofilin 1 [Source:RGD Symbol;Acc:69285]
Srf	chr9	145	63	93.3007	59.4722	33.8285	1.56881	0.0057073	0.314657	NotSig	0.385536	small	11.653	8.81021	14.4957	0.495926	1.47896	1.64533	0.139151	0.999837	Not Sig	nonsignificant	.	Y	serum response factor [Source:RGD Symbol;Acc:1559787]
Tamalin	chr7	253	47	121.857	94.6636	27.1932	1.28726	0.00595418	0.323434	NotSig	0.418953	small	10.7214	5.32469	16.1181	0.608115	2.81831	3.02704	0.00482767	0.300545	Not Sig	nonsignificant	.	Y	trafficking regulator and scaffold protein tamalin [Source:RGD Symbol;Acc:70554]
Tmem126a	chr1	37	49	46.2538	76.1773	-29.9235	0.607186	0.00623993	0.326351	NotSig	-0.649165	medium	10.7959	13.1277	8.4641	0.488517	-1.25261	0.644752	0.210348	0.999837	Not Sig	nonsignificant	.	Y	transmembrane protein 126A [Source:RGD Symbol;Acc:1305677]
Samd8	chr15	145	127	108.86	87.3677	21.4925	1.246	0.00624341	0.326351	NotSig	0.337572	small	13.8282	12.8119	14.8445	0.428425	0.285907	1.15865	0.77495	0.999837	Not Sig	nonsignificant	Y	Y	sterile alpha motif domain containing 8 [Source:RGD Symbol;Acc:1306447]
Rraga	chr5	318	192	113.114	96.3723	16.7412	1.17371	0.0061497	0.326351	NotSig	0.235243	small	54.8729	49.1121	60.6336	0.21564	1.38254	1.2346	0.166807	0.999837	Not Sig	nonsignificant	Y	.	Ras-related GTP binding A [Source:RGD Symbol;Acc:619804]
Ski	chr5	247	166	100.364	81.7922	18.5722	1.22707	0.00613246	0.326351	NotSig	0.268204	small	27.903	27.5167	28.2893	0.331937	0.193988	1.02808	0.846186	0.999837	Not Sig	nonsignificant	Y	Y	Ski proto-oncogene [Source:RGD Symbol;Acc:1565591]
Rock2	chr6	184	118	116.558	94.805	21.7527	1.22945	0.00612391	0.326351	NotSig	0.312841	small	22.3433	20.1619	24.5248	0.322967	0.766897	1.2164	0.443142	0.999837	Not Sig	nonsignificant	.	.	Rho-associated coiled-coil containing protein kinase 2 [Source:RGD Symbol;Acc:3590]
Sybu	chr7	92	90	101.409	76.921	24.488	1.31835	0.00630847	0.326351	NotSig	0.412938	small	20.1286	22.5221	17.7351	0.367111	-0.775999	0.787452	0.437749	0.999837	Not Sig	nonsignificant	.	.	syntabulin [Source:RGD Symbol;Acc:1564335]
Rpl4	chr8	1093	764	74.3562	80.757	-6.40073	0.920741	0.00623247	0.326351	NotSig	-0.121433	negligible	247.049	232.113	261.985	0.161808	1.00669	1.12869	0.314085	0.999837	Not Sig	nonsignificant	.	.	ribosomal protein L4 [Source:RGD Symbol;Acc:619824]
Fip1l1	chr14	64	49	77.1047	109.576	-32.4716	0.703662	0.00613378	0.326351	NotSig	-0.534761	medium	8.41641	7.87817	8.95465	0.557623	0.195532	1.13664	0.844976	0.999837	Not Sig	nonsignificant	.	Y	factor interacting with PAPOLA and CPSF1 [Source:RGD Symbol;Acc:1309336]
Fastk	chr4	141	115	77.5067	102.123	-24.6162	0.758955	0.00642332	0.327223	NotSig	-0.391222	small	33.7277	35.8591	31.5963	0.279257	-0.590827	0.881124	0.554636	0.999837	Not Sig	nonsignificant	.	.	Fas-activated serine/threonine kinase [Source:RGD Symbol;Acc:1311601]
Yipf6	chrX	57	41	68.8861	109.239	-40.3525	0.630602	0.00640729	0.327223	NotSig	-0.486398	small	7.63006	8.00617	7.25395	0.559137	-0.19716	0.906045	0.843702	0.999837	Not Sig	nonsignificant	Y	Y	Yip1 domain family, member 6 [Source:RGD Symbol;Acc:1566154]
RGD1563072	chr5	86	88	76.3183	107.52	-31.2014	0.709807	0.00653328	0.331109	NotSig	-0.386421	small	13.4494	14.9806	11.9182	0.409927	-0.827899	0.795572	0.407728	0.999837	Not Sig	nonsignificant	.	.	RIKEN cDNA 5730409E04Rik gene [Source:MGI Symbol;Acc:MGI:3609248]
Clptm1l	chr1	161	129	76.6549	97.0233	-20.3684	0.790067	0.00659115	0.331697	NotSig	-0.262461	small	40.5955	40.0066	41.1844	0.251161	0.0584798	1.02944	0.953366	0.999837	Not Sig	nonsignificant	.	.	CLPTM1-like [Source:RGD Symbol;Acc:1307896]
Slc25a25	chr3	111	36	128.465	89.0686	39.3968	1.44232	0.00664608	0.331697	NotSig	0.535139	medium	11.4758	4.16846	18.7832	0.51715	3.75079	4.50604	0.000176276	0.02115	FDR<0.05	upregulated	.	Y	solute carrier family 25 member 25 [Source:RGD Symbol;Acc:628666]
Vrk1	chr6	22	25	83.7996	131.732	-47.9323	0.636137	0.00676658	0.334916	NotSig	-0.892598	large	6.91863	7.54651	6.29075	0.578773	-0.519865	0.833597	0.603157	0.999837	Not Sig	nonsignificant	.	.	VRK serine/threonine kinase 1 [Source:RGD Symbol;Acc:1306069]
LOC120096423	chr13	73	54	24.3543	15.3595	8.99481	1.58562	0.00677871	0.334916	NotSig	0.311955	small	91.4843	97.6628	85.3058	1.10762	-0.181792	0.873473	0.855746	0.999837	Not Sig	nonsignificant	.	.	U4atac minor spliceosomal RNA [Source:RGD Symbol;Acc:41059766]
Romo1	chr3	279	207	65.622	79.1665	-13.5445	0.828911	0.00695342	0.34183	NotSig	-0.215808	small	60.0787	58.8406	61.3168	0.213621	0.187416	1.04208	0.851335	0.999837	Not Sig	nonsignificant	.	.	reactive oxygen species modulator 1 [Source:RGD Symbol;Acc:1587111]
Trnt1	chr4	31	29	58.449	102.964	-44.5152	0.567663	0.00708976	0.346391	NotSig	-0.676075	medium	7.82363	7.47741	8.16986	0.540509	0.187945	1.09261	0.85092	0.999837	Not Sig	nonsignificant	.	.	tRNA nucleotidyl transferase 1 [Source:RGD Symbol;Acc:1308857]
Fam120a	chr17	128	105	90.7151	116.612	-25.8971	0.777921	0.00721111	0.348225	NotSig	-0.385414	small	20.5038	21.3353	19.6724	0.338552	-0.317512	0.922056	0.750855	0.999837	Not Sig	nonsignificant	.	.	family with sequence similarity 120A [Source:RGD Symbol;Acc:1306643]
Senp6	chr8	87	62	77.7624	125.071	-47.3081	0.621749	0.00722517	0.348225	NotSig	-0.400211	small	12.8402	12.1254	13.555	0.477426	0.294528	1.1179	0.768354	0.999837	Not Sig	nonsignificant	Y	Y	SUMO specific peptidase 6 [Source:RGD Symbol;Acc:1304565]
Pitpnm1	chr1	173	157	84.0297	68.8345	15.1952	1.22075	0.00736454	0.349798	NotSig	0.235087	small	45.7747	50.2293	41.3202	0.280526	-1.01554	0.822631	0.309847	0.999837	Not Sig	nonsignificant	.	.	phosphatidylinositol transfer protein, membrane-associated 1 [Source:RGD Symbol;Acc:1306710]
Get3	chr19	257	148	77.7697	95.3431	-17.5735	0.815682	0.00730657	0.349798	NotSig	-0.282211	small	53.7099	48.0215	59.3983	0.227945	1.25825	1.23691	0.208302	0.999837	Not Sig	nonsignificant	.	.	guided entry of tail-anchored proteins factor 3, ATPase [Source:RGD Symbol;Acc:1307906]
Bmyc	chr3	139	107	77.2307	102.181	-24.9504	0.755822	0.00735283	0.349798	NotSig	-0.372381	small	27.9336	26.1274	29.7398	0.333415	0.441235	1.13826	0.659043	0.999837	Not Sig	nonsignificant	.	.	brain expressed myelocytomatosis oncogene [Source:RGD Symbol;Acc:1584970]
Fam185a	chr4	41	28	84.3543	146.236	-61.8812	0.576838	0.00744348	0.350164	NotSig	-0.648896	medium	8.78181	7.00731	10.5563	0.516522	0.972782	1.50647	0.330662	0.999837	Not Sig	nonsignificant	Y	.	family with sequence similarity 185, member A [Source:RGD Symbol;Acc:1562135]
Ppib	chr8	403	283	67.884	79.9105	-12.0265	0.8495	0.00754837	0.353407	NotSig	-0.214456	small	91.383	87.6815	95.0845	0.177624	0.72328	1.08443	0.469508	0.999837	Not Sig	nonsignificant	.	.	peptidylprolyl isomerase B [Source:RGD Symbol;Acc:620312]
Alg2	chr5	271	213	96.0652	82.4076	13.6576	1.16573	0.00771235	0.359374	NotSig	0.207704	small	42.5537	43.7406	41.3668	0.245782	-0.303826	0.945732	0.761261	0.999837	Not Sig	nonsignificant	.	.	ALG2, alpha-1,3/1,6-mannosyltransferase [Source:RGD Symbol;Acc:1309940]
Timm50	chr1	83	62	74.9573	101.975	-27.0176	0.735057	0.00795606	0.362148	NotSig	-0.422101	small	18.1484	19.6354	16.6614	0.363436	-0.450702	0.848543	0.652204	0.999837	Not Sig	nonsignificant	.	.	translocase of inner mitochondrial membrane 50 [Source:RGD Symbol;Acc:1587684]
Synpr	chr15	336	231	92.7277	107.669	-14.9413	0.861229	0.00786109	0.362148	NotSig	-0.249062	small	71.731	69.2036	74.2585	0.202751	0.512455	1.07304	0.608333	0.999837	Not Sig	nonsignificant	.	Y	synaptoporin [Source:RGD Symbol;Acc:708366]
Akap9	chr4	45	39	129.793	88.4218	41.3713	1.46789	0.00782563	0.362148	NotSig	0.560413	medium	11.4359	11.7237	11.1481	0.439673	-0.164699	0.950907	0.869181	0.999837	Not Sig	nonsignificant	.	Y	A-kinase anchoring protein 9 [Source:RGD Symbol;Acc:620833]
Rnf220	chr5	190	161	72.4824	90.2423	-17.7599	0.803198	0.00791624	0.362148	NotSig	-0.224473	small	41.1613	40.7354	41.5872	0.257197	-0.0356668	1.02091	0.971548	0.999837	Not Sig	nonsignificant	.	.	ring finger protein 220 [Source:RGD Symbol;Acc:1598210]
Gng12	chr4	51	35	117.773	87.8672	29.9058	1.34035	0.0079327	0.362148	NotSig	0.602717	medium	6.39915	6.4239	6.37441	0.637493	-0.061217	0.992296	0.951186	0.999837	Not Sig	nonsignificant	Y	Y	G protein subunit gamma 12 [Source:RGD Symbol;Acc:621516]
Osbp2	chr14	158	77	109.296	81.1878	28.1077	1.34621	0.00805889	0.362783	NotSig	0.368706	small	21.8811	15.8497	27.9125	0.433548	1.75498	1.76108	0.0792635	0.999837	Not Sig	nonsignificant	.	.	oxysterol binding protein 2 [Source:RGD Symbol;Acc:1310505]
Golph3	chr2	128	97	111.819	86.6655	25.1532	1.29023	0.00809372	0.362783	NotSig	0.33514	small	23.1162	21.6966	24.5358	0.3504	0.237372	1.13086	0.812368	0.999837	Not Sig	nonsignificant	.	Y	golgi phosphoprotein 3 [Source:RGD Symbol;Acc:621226]
C1qtnf5	chr8	39	29	70.7158	104.435	-33.7194	0.677126	0.00810033	0.362783	NotSig	-0.697863	medium	8.9123	9.37984	8.44475	0.564671	-0.177181	0.900308	0.859366	0.999837	Not Sig	nonsignificant	.	.	C1q and TNF related 5 [Source:RGD Symbol;Acc:1308802]
Prr12	chr1	38	47	94.1097	52.7234	41.3863	1.78497	0.00821497	0.365473	NotSig	0.517667	medium	9.2747	11.3333	7.21613	0.498637	-1.31876	0.636722	0.187248	0.999837	Not Sig	nonsignificant	.	.	proline rich 12 [Source:RGD Symbol;Acc:1309896]
Bola2	chr1	301	265	60.0717	68.1273	-8.05555	0.881757	0.00842879	0.366057	NotSig	-0.245561	small	20.2744	20.5651	19.9837	0.366956	-0.200513	0.971725	0.841079	0.999837	Not Sig	nonsignificant	.	.	bolA family member 2 [Source:RGD Symbol;Acc:1565363]
Atp1a1	chr2	930	517	118.725	108.905	9.8201	1.09017	0.00842468	0.366057	NotSig	0.14835	negligible	191.904	156.417	227.39	0.159729	3.25145	1.45374	0.00114817	0.0935406	Not Sig	nonsignificant	.	Y	ATPase Na+/K+ transporting subunit alpha 1 [Source:RGD Symbol;Acc:2167]
Olfm1	chr3	4210	3108	89.5826	94.3079	-4.72536	0.949894	0.00839967	0.366057	NotSig	-0.061363	negligible	881.9	816.366	947.434	0.125735	1.63802	1.16055	0.101419	0.999837	Not Sig	nonsignificant	.	.	olfactomedin 1 [Source:RGD Symbol;Acc:620320]
Ptges2	chr3	89	70	79.6452	106.745	-27.0995	0.746128	0.00840544	0.366057	NotSig	-0.450163	small	20.4331	20.9421	19.924	0.369852	-0.138425	0.951386	0.889904	0.999837	Not Sig	nonsignificant	.	.	prostaglandin E synthase 2 [Source:RGD Symbol;Acc:1310836]
Zfp277	chr6	25	21	57.7963	126.305	-68.5087	0.457593	0.00839424	0.366057	NotSig	-0.827573	large	6.27783	6.43102	6.12463	0.620067	-0.025834	0.952358	0.97939	0.999837	Not Sig	nonsignificant	.	.	zinc finger protein 277 [Source:RGD Symbol;Acc:1583856]
Ripor1	chr19	76	70	66.0171	90.0824	-24.0653	0.732852	0.00852527	0.367634	NotSig	-0.514881	medium	18.3611	19.169	17.5532	0.351704	-0.499152	0.915711	0.617672	0.999837	Not Sig	nonsignificant	.	Y	RHO family interacting cell polarization regulator 1 [Source:RGD Symbol;Acc:1307772]
Nsg1	chr14	425	339	90.9655	103.771	-12.8052	0.876601	0.00857937	0.367708	NotSig	-0.180357	negligible	78.4167	74.4134	82.4201	0.196646	0.632084	1.1076	0.527332	0.999837	Not Sig	nonsignificant	.	Y	neuronal vesicle trafficking associated 1 [Source:RGD Symbol;Acc:2222]
Exd2	chr6	87	54	62.1332	92.0254	-29.8922	0.675174	0.00881608	0.374854	NotSig	-0.328277	small	18.0905	18.3509	17.8302	0.366111	0.00924652	0.971627	0.992622	0.999837	Not Sig	nonsignificant	.	.	exonuclease 3'-5' domain containing 2 [Source:RGD Symbol;Acc:1311087]
Ncoa5	chr3	44	38	58.9093	91.2338	-32.3245	0.645696	0.00884522	0.374854	NotSig	-0.679133	medium	8.27819	8.87691	7.67946	0.54841	-0.339071	0.865105	0.734556	0.999837	Not Sig	nonsignificant	.	.	nuclear receptor coactivator 5 [Source:RGD Symbol;Acc:1307702]
LOC103690742	chr9	371	302	93.4848	108.161	-14.6763	0.864311	0.00926516	0.389295	NotSig	-0.200215	small	58.5709	54.7842	62.3576	0.228414	0.758315	1.13824	0.448263	0.999837	Not Sig	nonsignificant	.	Y	uncharacterized LOC103690742 [Source:RGD Symbol;Acc:9281506]
Cacnb3	chr7	234	210	87.3044	102.436	-15.1316	0.852283	0.00937628	0.392288	NotSig	-0.204241	small	52.6649	57.0765	48.2534	0.224956	-1.0467	0.845417	0.295239	0.999837	Not Sig	nonsignificant	.	.	calcium voltage-gated channel auxiliary subunit beta 3 [Source:RGD Symbol;Acc:2248]
Sdhaf1	chr1	111	118	71.7126	94.1511	-22.4385	0.761676	0.00952188	0.393358	NotSig	-0.337053	small	25.9149	30.7924	21.0373	0.322358	-1.63277	0.683197	0.102518	0.999837	Not Sig	nonsignificant	Y	.	succinate dehydrogenase complex assembly factor 1 [Source:RGD Symbol;Acc:1562079]
Tomm20	chr19	506	311	92.9545	80.9318	12.0227	1.14855	0.00945537	0.393358	NotSig	0.205649	small	106.886	92.6831	121.089	0.177977	2.0891	1.30649	0.0366989	0.999837	Not Sig	nonsignificant	.	.	translocase of outer mitochondrial membrane 20 [Source:RGD Symbol;Acc:708467]
Ppp1cb	chr6	442	358	86.715	98.2415	-11.5265	0.882672	0.00951437	0.393358	NotSig	-0.180862	negligible	84.6487	83.967	85.3303	0.215968	-0.112952	1.01624	0.910068	0.999837	Not Sig	nonsignificant	Y	.	protein phosphatase 1 catalytic subunit beta [Source:RGD Symbol;Acc:3376]
Supt6h	chr10	138	106	86.04	109.94	-23.9002	0.782607	0.0096157	0.395572	NotSig	-0.318573	small	29.6331	29.7117	29.5545	0.303299	-0.0143254	0.994709	0.98857	0.999837	Not Sig	nonsignificant	.	.	SPT6 homolog, histone chaperone and transcription elongation factor [Source:RGD Symbol;Acc:1309290]
Fam162a	chr11	158	131	63.5306	79.6291	-16.0985	0.797832	0.00976375	0.398328	NotSig	-0.293352	small	37.3439	35.2862	39.4016	0.267866	0.363524	1.11663	0.716213	0.999837	Not Sig	nonsignificant	.	.	family with sequence similarity 162, member A [Source:RGD Symbol;Acc:1590883]
Lamtor3	chr2	66	49	93.218	59.9282	33.2898	1.55549	0.00974244	0.398328	NotSig	0.535301	medium	14.8991	14.6854	15.1129	0.388236	0.0894798	1.02911	0.928701	0.999837	Not Sig	nonsignificant	.	.	late endosomal/lysosomal adaptor, MAPK and MTOR activator 3 [Source:RGD Symbol;Acc:1307133]
Taf6	chr12	39	34	109.104	68.033	41.0707	1.60369	0.0101288	0.404825	NotSig	0.647464	medium	9.87236	10.0359	9.7088	0.47402	-0.0651803	0.967404	0.94803	0.999837	Not Sig	nonsignificant	.	.	TATA-box binding protein associated factor 6 [Source:RGD Symbol;Acc:1311608]
Tspan17	chr17	227	162	80.4737	93.6304	-13.1567	0.859483	0.0100494	0.404825	NotSig	-0.251078	small	49.4393	47.3239	51.5547	0.240565	0.466149	1.0894	0.641109	0.999837	Not Sig	nonsignificant	.	.	tetraspanin 17 [Source:RGD Symbol;Acc:1311167]
C1qtnf4	chr3	612	459	81.5465	92.1807	-10.6342	0.884638	0.0100499	0.404825	NotSig	-0.160647	negligible	122.188	116.61	127.765	0.160683	0.82451	1.09566	0.40965	0.999837	Not Sig	nonsignificant	.	.	C1q and TNF related 4 [Source:RGD Symbol;Acc:1311006]
U2af1l4	chr1	99	69	73.7759	100.105	-26.3296	0.736982	0.0100834	0.404825	NotSig	-0.351398	small	21.4409	21.0427	21.8391	0.333165	0.312036	1.03785	0.755013	0.999837	Not Sig	nonsignificant	.	.	U2 small nuclear RNA auxiliary factor 1-like 4 [Source:RGD Symbol;Acc:1305600]
Dusp6	chr7	71	15	118.542	53.371	65.1706	2.22109	0.0100972	0.404825	NotSig	0.760509	medium	9.30799	2.84771	15.7683	0.697529	3.10805	5.53718	0.00188326	0.130817	Not Sig	nonsignificant	.	Y	dual specificity phosphatase 6 [Source:RGD Symbol;Acc:70978]
Fbl	chr1	171	65	100.524	80.0816	20.4424	1.25527	0.0102067	0.406284	NotSig	0.37184	small	30.376	20.6488	40.1032	0.4346	2.22409	1.94216	0.0261427	0.999837	Not Sig	nonsignificant	.	.	fibrillarin [Source:RGD Symbol;Acc:1305542]
Ip6k2	chr8	221	174	90.1481	76.5438	13.6043	1.17773	0.0104737	0.410268	NotSig	0.259804	small	50.0307	50.5124	49.549	0.235633	-0.0951457	0.980928	0.924199	0.999837	Not Sig	nonsignificant	.	.	inositol hexakisphosphate kinase 2 [Source:RGD Symbol;Acc:620529]
Fech	chr18	51	44	83.8428	131.771	-47.9283	0.636276	0.0105748	0.412549	NotSig	-0.562184	medium	12.3936	12.4331	12.354	0.461948	0.126327	0.993636	0.899473	0.999837	Not Sig	nonsignificant	.	.	ferrochelatase [Source:RGD Symbol;Acc:1307556]
Serf2	chr3	394	289	89.2017	79.7505	9.45122	1.11851	0.0107932	0.416153	NotSig	0.160609	negligible	89.245	83.3759	95.1141	0.178949	0.972353	1.14079	0.330875	0.999837	Not Sig	nonsignificant	.	.	small EDRK-rich factor 2 [Source:RGD Symbol;Acc:1588368]
Anln	chr8	55	56	82.4754	107.377	-24.9015	0.768093	0.0109218	0.419465	NotSig	-0.432352	small	9.11559	10.1726	8.05853	0.499522	-0.798291	0.792176	0.424702	0.999837	Not Sig	nonsignificant	.	.	anillin, actin binding protein [Source:RGD Symbol;Acc:1561367]
Fth1	chr1	6148	4100	82.499	80.3621	2.13684	1.02659	0.0112078	0.423828	NotSig	0.0697503	negligible	1395.88	1281.22	1510.54	0.117069	2.0165	1.17899	0.0437474	0.999837	Not Sig	nonsignificant	.	.	ferritin heavy chain 1 [Source:RGD Symbol;Acc:2635]
Cbx4	chr10	163	103	96.2421	78.9751	17.267	1.21864	0.0113933	0.426244	NotSig	0.281377	small	20.489	15.0671	25.911	0.419882	1.73813	1.71971	0.0821879	0.999837	Not Sig	nonsignificant	.	.	chromobox 4 [Source:RGD Symbol;Acc:1587243]
Enpp5	chr9	297	257	99.3099	113.406	-14.0959	0.875704	0.0113538	0.426244	NotSig	-0.201041	small	53.1782	55.497	50.8594	0.222311	-0.445134	0.916436	0.656223	0.999837	Not Sig	nonsignificant	.	.	ectonucleotide pyrophosphatase/phosphodiesterase family member 5 [Source:RGD Symbol;Acc:1359199]
Ctnnd1	chr3	38	28	143.824	90.9839	52.8398	1.58076	0.0114018	0.426244	NotSig	0.601737	medium	6.68286	4.84519	8.52053	0.632796	1.20323	1.75856	0.228888	0.999837	Not Sig	nonsignificant	Y	.	catenin delta 1 [Source:RGD Symbol;Acc:1305643]
Sgk1	chr1	412	204	110.194	91.9656	18.2283	1.19821	0.0115288	0.427741	NotSig	0.196438	negligible	72.8164	52.91	92.7227	0.213951	3.59307	1.75246	0.000326799	0.0336961	FDR<0.05	nonsignificant	.	Y	serum/glucocorticoid regulated kinase 1 [Source:RGD Symbol;Acc:3668]
Mtor	chr5	104	60	65.9991	93.512	-27.513	0.705782	0.0116337	0.43001	NotSig	-0.356032	small	16.9738	15.9914	17.9561	0.38682	0.571535	1.12286	0.567637	0.999837	Not Sig	nonsignificant	.	Y	mechanistic target of rapamycin kinase [Source:RGD Symbol;Acc:68371]
Blcap	chr3	153	158	80.3675	102.241	-21.8735	0.78606	0.0117476	0.430979	NotSig	-0.302252	small	32.1255	37.6003	26.6508	0.284931	-1.61355	0.708791	0.106626	0.999837	Not Sig	nonsignificant	.	.	BLCAP, apoptosis inducing factor [Source:RGD Symbol;Acc:621666]
Lypla1	chr5	54	43	88.4174	135.096	-46.6787	0.654478	0.0117355	0.430979	NotSig	-0.472604	small	11.5042	13.3413	9.66706	0.491696	-0.955492	0.724596	0.339329	0.999837	Not Sig	nonsignificant	.	Y	lysophospholipase 1 [Source:RGD Symbol;Acc:3025]
Rnf13	chr2	150	124	87.2904	101.803	-14.5127	0.857444	0.0117974	0.431197	NotSig	-0.297136	small	33.0047	31.9098	34.0997	0.301219	0.368294	1.06863	0.712654	0.999837	Not Sig	nonsignificant	.	.	ring finger protein 13 [Source:RGD Symbol;Acc:1594062]
Ubr5	chr7	101	89	124.951	86.9466	38.0041	1.4371	0.0118831	0.432721	NotSig	0.362449	small	26.4491	27.4036	25.4947	0.313961	-0.198232	0.930342	0.842864	0.999837	Not Sig	nonsignificant	.	Y	ubiquitin protein ligase E3 component n-recognin 5 [Source:RGD Symbol;Acc:621236]
Ak1	chr3	236	200	81.8828	99.1315	-17.2487	0.826002	0.0119604	0.433928	NotSig	-0.25568	small	31.096	32.4826	29.7094	0.335547	-0.437531	0.914624	0.661727	0.999837	Not Sig	nonsignificant	.	.
Atxn2l	chr1	138	76	95.8087	132.445	-36.6359	0.723387	0.0121139	0.436277	NotSig	-0.40017	small	28.5008	27.3142	29.6874	0.295269	0.528292	1.08689	0.597297	0.999837	Not Sig	nonsignificant	.	.	ataxin 2-like [Source:RGD Symbol;Acc:1565868]
LOC499331	chr1	35	23	125.095	81.2268	43.8686	1.54008	0.0125572	0.441363	NotSig	0.623072	medium	6.93898	6.67429	7.20367	0.597391	0.0920456	1.07932	0.926662	0.999837	Not Sig	nonsignificant	.	.
H3f3b	chr10	1470	474	96.0048	81.9382	14.0666	1.17167	0.0124874	0.441363	NotSig	0.136051	negligible	163.278	89.1628	237.394	0.245254	5.69705	2.66248	1.21901e-08	5.78971e-06	FDR<0.05	upregulated	Y	Y	H3.3 histone B [Source:RGD Symbol;Acc:621095]
Irs2	chr16	365	65	117.587	89.2714	28.3155	1.31718	0.0123516	0.441363	NotSig	0.354725	small	39.4604	15.0982	63.8227	0.374398	5.58827	4.22718	2.29337e-08	8.90234e-06	FDR<0.05	upregulated	.	.	insulin receptor substrate 2 [Source:RGD Symbol;Acc:69316]
Srsf3	chr20	290	196	108.498	89.2924	19.2055	1.21509	0.0125453	0.441363	NotSig	0.226004	small	20.5962	18.3313	22.8612	0.370938	0.503797	1.24711	0.614404	0.999837	Not Sig	nonsignificant	.	Y	serine and arginine rich splicing factor 3 [Source:RGD Symbol;Acc:1309233]
Ddx3x	chrX	318	133	133.629	118.094	15.5347	1.13155	0.0125693	0.441363	NotSig	0.249334	small	41.3741	28.7826	53.9657	0.265309	3.10827	1.87495	0.00188184	0.130817	Not Sig	nonsignificant	.	Y	DEAD-box helicase 3, X-linked [Source:RGD Symbol;Acc:1564771]
Ppil4	chr1	73	54	103.748	73.82	29.9283	1.40542	0.0124374	0.441363	NotSig	0.507809	medium	13.4657	12.8576	14.0738	0.426156	0.0857062	1.09459	0.9317	0.999837	Not Sig	nonsignificant	.	Y	peptidylprolyl isomerase like 4 [Source:RGD Symbol;Acc:1311051]
Psmg2	chr18	33	33	78.2879	134.245	-55.9568	0.583173	0.0123869	0.441363	NotSig	-0.66553	medium	7.54888	8.53585	6.56192	0.533547	-0.719455	0.768748	0.47186	0.999837	Not Sig	nonsignificant	.	.	proteasome assembly chaperone 2 [Source:RGD Symbol;Acc:1304867]
Cops4	chr14	131	94	107.398	89.1165	18.281	1.20514	0.0126307	0.441545	NotSig	0.338102	small	27.8405	26.4547	29.2263	0.305292	0.412037	1.10477	0.680313	0.999837	Not Sig	nonsignificant	.	.	COP9 signalosome subunit 4 [Source:RGD Symbol;Acc:1302952]
Atcay	chr7	142	94	87.1881	106.277	-19.0886	0.820388	0.0127339	0.441545	NotSig	-0.335093	small	19.9607	18.9596	20.9618	0.349583	0.385197	1.10561	0.700092	0.999837	Not Sig	nonsignificant	.	.	ATCAY kinesin light chain interacting caytaxin [Source:RGD Symbol;Acc:1309312]
Ddx21	chr20	63	29	125.565	64.7781	60.7867	1.93838	0.0127064	0.441545	NotSig	0.595412	medium	9.44394	7.25996	11.6279	0.545909	1.48956	1.60165	0.136341	0.999837	Not Sig	nonsignificant	.	.	DExD-box helicase 21 [Source:RGD Symbol;Acc:1307306]
Lsm14b	chr3	106	82	94.6794	127.519	-32.8392	0.742475	0.0127997	0.441568	NotSig	-0.427824	small	11.4226	11.7546	11.0907	0.461138	-0.011059	0.943526	0.991176	0.999837	Not Sig	nonsignificant	.	Y	LSM family member 14B [Source:RGD Symbol;Acc:1563798]
LOC691807	chr2	183	126	111.451	94.4625	16.9887	1.17985	0.012901	0.44196	NotSig	0.262164	small	39.8735	36.6048	43.1423	0.259565	1.00534	1.1786	0.314732	0.999837	Not Sig	nonsignificant	.	.
Man1b1	chr3	147	91	136.317	111.393	24.9234	1.22374	0.012859	0.44196	NotSig	0.316539	small	20.093	19.6857	20.5004	0.353592	0.385615	1.04139	0.699782	0.999837	Not Sig	nonsignificant	.	.	mannosidase, alpha, class 1B, member 1 [Source:RGD Symbol;Acc:1563595]
Rpl3	chr7	1076	796	58.7448	64.1059	-5.36112	0.916371	0.0131471	0.448827	NotSig	-0.0620978	negligible	249.212	241.49	256.934	0.144033	0.586426	1.06395	0.557589	0.999837	Not Sig	nonsignificant	.	.	ribosomal protein L3 [Source:RGD Symbol;Acc:735105]
Cib2	chr8	124	68	89.0118	69.0001	20.0117	1.29002	0.013362	0.454585	NotSig	0.29024	small	22.574	18.4411	26.7069	0.335862	1.34986	1.44822	0.177061	0.999837	Not Sig	nonsignificant	.	.
Abr	chr10	675	486	89.9905	79.4558	10.5347	1.13259	0.0136599	0.461528	NotSig	0.141999	negligible	92.4236	93.906	90.9413	0.226721	-0.112242	0.968429	0.910631	0.999837	Not Sig	nonsignificant	.	.	ABR activator of RhoGEF and GTPase [Source:RGD Symbol;Acc:1306279]
Hnrnpr	chr5	100	81	107.767	80.7844	26.9822	1.334	0.0136413	0.461528	NotSig	0.349467	small	10.6753	9.93984	11.4108	0.475469	0.400025	1.14799	0.689138	0.999837	Not Sig	nonsignificant	Y	Y	heterogeneous nuclear ribonucleoprotein R [Source:RGD Symbol;Acc:631348]
Spata2	chr3	71	66	69.1738	98.5382	-29.3644	0.702	0.0137317	0.462365	NotSig	-0.42504	small	7.39205	7.70838	7.07572	0.556803	-0.204422	0.917926	0.838024	0.999837	Not Sig	nonsignificant	.	.	spermatogenesis associated 2 [Source:RGD Symbol;Acc:620754]
Lonp2	chr19	81	73	87.4209	63.0559	24.365	1.3864	0.014076	0.470732	NotSig	0.312402	small	19.8541	22.3298	17.3784	0.349436	-0.86461	0.77826	0.387253	0.999837	Not Sig	nonsignificant	.	.	lon peptidase 2, peroxisomal [Source:RGD Symbol;Acc:1305466]
Mrps5	chr3	64	48	77.9015	101.077	-23.1758	0.770712	0.0142108	0.47363	NotSig	-0.404664	small	7.0384	6.40945	7.66735	0.589319	0.255913	1.19626	0.798018	0.999837	Not Sig	nonsignificant	.	.	mitochondrial ribosomal protein S5 [Source:RGD Symbol;Acc:1308318]
Tef	chr7	294	298	97.404	109.17	-11.7662	0.892221	0.0142803	0.474339	NotSig	-0.176928	negligible	38.3815	44.8128	31.9501	0.259002	-1.8854	0.71297	0.0593765	0.999837	Not Sig	nonsignificant	.	Y	TEF transcription factor, PAR bZIP family member [Source:RGD Symbol;Acc:3841]
Hnrnpd	chr14	334	212	76.8015	61.7195	15.0819	1.24436	0.0145636	0.476416	NotSig	0.198498	negligible	65.6289	57.4151	73.8427	0.262753	1.27345	1.28612	0.20286	0.999837	Not Sig	nonsignificant	.	Y	heterogeneous nuclear ribonucleoprotein D [Source:RGD Symbol;Acc:620365]
Stxbp1	chr3	822	650	111.851	102.12	9.73096	1.09529	0.014535	0.476416	NotSig	0.132016	negligible	156.995	159.677	154.313	0.155873	-0.178031	0.96641	0.858698	0.999837	Not Sig	nonsignificant	.	.	syntaxin binding protein 1 [Source:RGD Symbol;Acc:3785]
Calm1	chr6	2810	1992	90.3813	86.9872	3.39411	1.03902	0.0144396	0.476416	NotSig	0.0839311	negligible	377.411	355.829	398.993	0.143791	1.07346	1.12131	0.283064	0.999837	Not Sig	nonsignificant	.	Y	calmodulin 1 [Source:RGD Symbol;Acc:2257]
Cox6b1	chr1	926	716	84.021	88.9795	-4.95846	0.944274	0.0147028	0.478668	NotSig	-0.127194	negligible	101.666	113.373	89.9596	0.193286	-1.7207	0.793487	0.0853058	0.999837	Not Sig	nonsignificant	.	.	cytochrome c oxidase subunit 6B1 [Source:RGD Symbol;Acc:1584097]
Smc3	chr1	46	41	60.5965	98.5546	-37.9581	0.614852	0.0148388	0.479601	NotSig	-0.621579	medium	11.0127	10.2464	11.7791	0.463595	0.242604	1.14959	0.808312	0.999837	Not Sig	nonsignificant	.	Y	structural maintenance of chromosomes 3 [Source:RGD Symbol;Acc:62006]
Golgb1	chr11	31	26	74.8978	137.673	-62.7752	0.544027	0.0148778	0.479601	NotSig	-0.656043	medium	6.85483	5.67702	8.03263	0.590462	0.605904	1.41494	0.544578	0.999837	Not Sig	nonsignificant	.	.	golgin B1 [Source:RGD Symbol;Acc:708429]
Tbcc	chr9	79	77	74.235	96.8578	-22.6229	0.766432	0.0148042	0.479601	NotSig	-0.384056	small	17.3884	18.4038	16.3729	0.385781	-0.624385	0.889647	0.532375	0.999837	Not Sig	nonsignificant	.	.	tubulin folding cofactor C [Source:RGD Symbol;Acc:1306756]
Eif5a	chr10	1070	704	80.2216	75.5244	4.69722	1.06219	0.014992	0.481702	NotSig	0.164446	negligible	231.111	207.432	254.79	0.153179	1.84191	1.2283	0.0654888	0.999837	Not Sig	nonsignificant	.	.	eukaryotic translation initiation factor 5A [Source:RGD Symbol;Acc:1308029]
Marcks	chr20	332	264	87.8132	104.469	-16.6558	0.840567	0.0152923	0.487806	NotSig	-0.190757	negligible	19.5312	18.0909	20.9716	0.436927	0.209732	1.15923	0.833877	0.999837	Not Sig	nonsignificant	Y	Y	myristoylated alanine rich protein kinase C substrate [Source:RGD Symbol;Acc:3028]
Zc3h14	chr6	84	49	94.3181	65.8805	28.4376	1.43165	0.0153804	0.487806	NotSig	0.410716	small	15.1935	13.84	16.547	0.409532	0.603043	1.19559	0.54648	0.999837	Not Sig	nonsignificant	.	Y	zinc finger CCCH type containing 14 [Source:RGD Symbol;Acc:621850]
Ss18l2	chr8	133	93	97.4977	111.392	-13.894	0.875269	0.01548	0.489387	NotSig	-0.32994	small	27.5192	25.9458	29.0925	0.309492	0.681945	1.12128	0.495274	0.999837	Not Sig	nonsignificant	.	.	SS18 like 2 [Source:RGD Symbol;Acc:1590139]
Rgcc	chr15	185	149	102.112	85.69	16.4217	1.19164	0.0157563	0.49392	NotSig	0.278899	small	45.0084	46.9425	43.0742	0.268601	-0.604868	0.917593	0.545267	0.999837	Not Sig	nonsignificant	.	Y	regulator of cell cycle [Source:RGD Symbol;Acc:619721]
Plat	chr16	103	78	103.691	89.1168	14.5743	1.16354	0.0158556	0.49392	NotSig	0.351633	small	24.5183	24.1319	24.9047	0.348225	0.114118	1.03202	0.909144	0.999837	Not Sig	nonsignificant	.	Y	plasminogen activator, tissue type [Source:RGD Symbol;Acc:3342]
Tbc1d20	chr3	58	70	75.9696	109.122	-33.1523	0.69619	0.01584	0.49392	NotSig	-0.457871	small	10.1581	11.7634	8.55289	0.498856	-0.924243	0.727076	0.35536	0.999837	Not Sig	nonsignificant	.	Y	TBC1 domain family, member 20 [Source:RGD Symbol;Acc:1303293]
Timm13	chr7	359	257	100.838	113.121	-12.2828	0.891419	0.0161726	0.500027	NotSig	-0.197127	negligible	74.0156	70.3583	77.6728	0.197856	0.719061	1.10396	0.472103	0.999837	Not Sig	nonsignificant	.	.	translocase of inner mitochondrial membrane 13 [Source:RGD Symbol;Acc:628845]
Larp4b	chr17	65	54	116.84	82.6735	34.1662	1.41327	0.016304	0.500358	NotSig	0.390473	small	7.17118	7.9932	6.34916	0.608395	-0.554237	0.79432	0.579417	0.999837	Not Sig	nonsignificant	.	Y	La ribonucleoprotein 4B [Source:RGD Symbol;Acc:1310713]
Fbxo9	chr8	148	133	100.631	124.78	-24.1488	0.806468	0.0163804	0.500358	NotSig	-0.290381	small	36.2254	38.329	34.1217	0.262316	-0.474792	0.890231	0.634935	0.999837	Not Sig	nonsignificant	.	.	f-box protein 9 [Source:RGD Symbol;Acc:1310374]
Sdr39u1	chr15	75	59	105.282	80.4027	24.8791	1.30943	0.0165872	0.501803	NotSig	0.391072	small	20.7128	22.3862	19.0395	0.379362	-0.551652	0.850501	0.581187	0.999837	Not Sig	nonsignificant	.	.	short chain dehydrogenase/reductase family 39U, member 1 [Source:RGD Symbol;Acc:1309307]
RT1-DMb	chr20	28	19	115.03	74.4493	40.5806	1.54508	0.016587	0.501803	NotSig	0.782334	medium	7.38682	7.30773	7.46591	0.563178	0.154932	1.02165	0.876875	0.999837	Not Sig	nonsignificant	.	.	RT1 class II, locus DMb [Source:RGD Symbol;Acc:735096]
Cyp46a1	chr6	309	214	101.802	118.412	-16.6101	0.859726	0.0166905	0.503376	NotSig	-0.225187	small	65.3173	62.7724	67.8622	0.217324	0.431517	1.08108	0.666093	0.999837	Not Sig	nonsignificant	.	.	cytochrome P450, family 46, subfamily a, polypeptide 1 [Source:RGD Symbol;Acc:1306605]
Gtf3c2	chr6	36	25	79.4799	131.815	-52.3354	0.602964	0.0168194	0.504171	NotSig	-0.619089	medium	6.37074	6.12026	6.62122	0.625991	0.196075	1.08185	0.844551	0.999837	Not Sig	nonsignificant	Y	.	general transcription factor IIIC subunit 2 [Source:RGD Symbol;Acc:1560392]
Kcnn2	chr18	56	55	112.159	71.5137	40.6451	1.56835	0.0169005	0.505062	NotSig	0.371841	small	13.9188	14.5729	13.2648	0.412143	-0.294113	0.910237	0.768672	0.999837	Not Sig	nonsignificant	.	.	potassium calcium-activated channel subfamily N member 2 [Source:RGD Symbol;Acc:2963]
Drap1	chr1	144	127	75.0688	91.6414	-16.5726	0.819158	0.0172228	0.5071	NotSig	-0.22193	small	36.4376	38.8594	34.0159	0.266485	-0.49954	0.875357	0.617399	0.999837	Not Sig	nonsignificant	.	.	Dr1 associated protein 1 [Source:RGD Symbol;Acc:1308477]
Stambpl1	chr1	44	31	75.2684	112.749	-37.4801	0.667578	0.0179245	0.5071	NotSig	-0.526888	medium	9.93322	10.1847	9.68175	0.466443	-0.237405	0.950617	0.812343	0.999837	Not Sig	nonsignificant	.	.	STAM binding protein-like 1 [Source:RGD Symbol;Acc:1583011]
Ezh1	chr10	71	74	86.0835	119.063	-32.9797	0.723007	0.0183046	0.5071	NotSig	-0.317374	small	13.8114	15.7058	11.917	0.460797	-0.671225	0.758761	0.502077	0.999837	Not Sig	nonsignificant	.	.	enhancer of zeste 1 polycomb repressive complex 2 subunit [Source:RGD Symbol;Acc:1305028]
Grb2	chr10	437	295	101.145	89.0907	12.0547	1.13531	0.0183002	0.5071	NotSig	0.178746	negligible	52.0834	42.9683	61.1985	0.246991	2.01799	1.42427	0.0435918	0.999837	Not Sig	nonsignificant	.	.	growth factor receptor bound protein 2 [Source:RGD Symbol;Acc:619758]
Tfrc	chr11	160	78	179.717	150.545	29.1721	1.19378	0.0188828	0.5071	NotSig	0.328175	small	24.6601	20.7226	28.5975	0.370652	1.23733	1.38001	0.215963	0.999837	Not Sig	nonsignificant	.	Y	transferrin receptor [Source:RGD Symbol;Acc:70488]
Dynll1	chr12	1812	1229	98.3067	94.1886	4.1181	1.04372	0.0176349	0.5071	NotSig	0.0874144	negligible	394.08	363.116	425.043	0.129525	1.70281	1.17054	0.0886042	0.999837	Not Sig	nonsignificant	.	Y	dynein light chain LC8-type 1 [Source:RGD Symbol;Acc:619866]
Iscu	chr12	288	239	88.5119	98.9547	-10.4428	0.894469	0.0185585	0.5071	NotSig	-0.220146	small	69.0202	69.2913	68.7492	0.196096	-0.173617	0.992176	0.862166	0.999837	Not Sig	nonsignificant	.	.	iron-sulfur cluster assembly enzyme [Source:RGD Symbol;Acc:1309562]
Acox3	chr14	34	26	142.2	93.9551	48.2448	1.51349	0.0176842	0.5071	NotSig	0.660075	medium	5.96737	5.88892	6.04582	0.721921	0.357003	1.02664	0.721089	0.999837	Not Sig	nonsignificant	.	Y	acyl-CoA oxidase 3, pristanoyl [Source:RGD Symbol;Acc:69245]
Grk6	chr17	47	32	109.196	67.2267	41.9695	1.6243	0.0174517	0.5071	NotSig	0.466394	small	9.1255	7.84074	10.4103	0.514933	0.729164	1.32772	0.465901	0.999837	Not Sig	nonsignificant	.	.	G protein-coupled receptor kinase 6 [Source:RGD Symbol;Acc:61986]
Pitrm1	chr17	43	25	126.423	95.8611	30.5624	1.31882	0.017669	0.5071	NotSig	0.622472	medium	9.20359	8.02695	10.3802	0.510435	0.642304	1.29317	0.520676	0.999837	Not Sig	nonsignificant	.	.	pitrilysin metallopeptidase 1 [Source:RGD Symbol;Acc:1310998]
LOC361985	chr2	119	99	64.8528	84.4758	-19.623	0.767709	0.0179844	0.5071	NotSig	-0.289896	small	27.2207	29.4038	25.0376	0.297214	-0.763696	0.851509	0.445048	0.999837	Not Sig	nonsignificant	.	Y
RGD1561113	chr3	304	201	82.7038	96.4186	-13.7148	0.857758	0.018447	0.5071	NotSig	-0.202119	small	66.1266	62.6857	69.5676	0.207501	0.92041	1.10978	0.357358	0.999837	Not Sig	nonsignificant	.	.
RGD1309540	chr3	195	146	88.7448	108.688	-19.9433	0.816509	0.0189286	0.5071	NotSig	-0.222733	small	43.0347	41.6254	44.4441	0.253766	0.321279	1.06771	0.747999	0.999837	Not Sig	nonsignificant	.	.
Rheb	chr4	530	186	105.849	90.6653	15.1841	1.16747	0.0181646	0.5071	NotSig	0.217636	small	91.4323	53.7409	129.124	0.251581	4.89734	2.40271	9.71437e-07	0.000229033	FDR<0.05	upregulated	.	.	Ras homolog, mTORC1 binding [Source:RGD Symbol;Acc:621840]
Calu	chr4	89	71	109.047	83.9734	25.0739	1.29859	0.0177109	0.5071	NotSig	0.308115	small	14.0007	12.5088	15.4925	0.416816	0.635425	1.23853	0.525152	0.999837	Not Sig	nonsignificant	.	Y	calumenin [Source:RGD Symbol;Acc:620383]
Cirbp	chr7	139	87	112.234	140.179	-27.9457	0.800643	0.018142	0.5071	NotSig	-0.369076	small	22.8958	18.9794	26.8122	0.327111	1.41179	1.4127	0.158013	0.999837	Not Sig	nonsignificant	Y	Y	cold inducible RNA binding protein [Source:RGD Symbol;Acc:620756]
Zfp385a	chr7	78	55	80.4539	106.905	-26.4513	0.752572	0.0179431	0.5071	NotSig	-0.450639	small	13.0837	10.7344	15.433	0.421604	1.10973	1.43772	0.267115	0.999837	Not Sig	nonsignificant	.	.	zinc finger protein 385A [Source:RGD Symbol;Acc:1593784]
Birc2	chr8	28	36	120.771	59.0523	61.7191	2.04516	0.0185276	0.5071	NotSig	0.609099	medium	7.50952	9.16955	5.84949	0.539365	-1.30466	0.637926	0.192007	0.999837	Not Sig	nonsignificant	.	.	baculoviral IAP repeat-containing 2 [Source:RGD Symbol;Acc:620690]
Raver1	chr8	60	45	118.22	80.4344	37.7859	1.46977	0.0189027	0.5071	NotSig	0.406275	small	11.0013	11.0407	10.9619	0.483807	0.146108	0.992857	0.883836	0.999837	Not Sig	nonsignificant	.	.	ribonucleoprotein, PTB-binding 1 [Source:RGD Symbol;Acc:1359190]
Uqcrc1	chr8	432	304	82.5033	92.1265	-9.62314	0.895544	0.0181417	0.5071	NotSig	-0.148392	negligible	95.131	93.3266	96.9354	0.189069	0.332179	1.03867	0.739754	0.999837	Not Sig	nonsignificant	.	.	ubiquinol-cytochrome c reductase core protein 1 [Source:RGD Symbol;Acc:1303314]
Coa5	chr9	157	134	87.9399	105.874	-17.934	0.83061	0.0183091	0.5071	NotSig	-0.260828	small	12.4383	8.07128	16.8054	0.494318	1.91244	2.08212	0.0558192	0.999837	Not Sig	nonsignificant	.	.
Tceal8	chrX	177	94	106.151	88.2284	17.9226	1.20314	0.0170488	0.5071	NotSig	0.303609	small	34.9508	27.6296	42.2721	0.281996	1.94688	1.52995	0.0515486	0.999837	Not Sig	nonsignificant	.	.	transcription elongation factor A like 8 [Source:RGD Symbol;Acc:1359631]
Mrpl16	chr1	45	36	69.6197	102.675	-33.0554	0.678058	0.017476	0.5071	NotSig	-0.636765	medium	9.20321	10.0297	8.3767	0.561896	-0.253515	0.835188	0.79987	0.999837	Not Sig	nonsignificant	.	.	mitochondrial ribosomal protein L16 [Source:RGD Symbol;Acc:735195]
Tp53	chr10	32	25	83.2485	118.253	-35.0048	0.703985	0.0176769	0.5071	NotSig	-0.662688	medium	7.2265	7.62274	6.83026	0.547705	-0.308849	0.896037	0.757436	0.999837	Not Sig	nonsignificant	.	.	tumor protein p53 [Source:RGD Symbol;Acc:3889]
Ifi30	chr16	23	25	56.9186	92.1538	-35.2352	0.617648	0.0186193	0.5071	NotSig	-0.730971	medium	6.38661	8.36273	4.41049	0.62004	-1.34387	0.527399	0.178991	0.999837	Not Sig	nonsignificant	.	.	IFI30, lysosomal thiol reductase [Source:RGD Symbol;Acc:1310758]
Nup153	chr17	40	29	66.4479	116.324	-49.8761	0.571231	0.0186467	0.5071	NotSig	-0.611093	medium	7.01236	6.65246	7.37226	0.601625	0.370295	1.1082	0.711163	0.999837	Not Sig	nonsignificant	.	.	nucleoporin 153 [Source:RGD Symbol;Acc:3216]
Ik	chr18	141	86	81.3727	59.6851	21.6876	1.36337	0.0180443	0.5071	NotSig	0.311173	small	29.9072	26.8262	32.9883	0.28853	0.986712	1.2297	0.323784	0.999837	Not Sig	nonsignificant	.	.
Armc10	chr4	53	48	108.981	77.4351	31.5461	1.40739	0.0187856	0.5071	NotSig	0.436437	small	14.5597	14.5831	14.5364	0.477747	0.0877132	0.996799	0.930105	0.999837	Not Sig	nonsignificant	.	.	armadillo repeat containing 10 [Source:RGD Symbol;Acc:1305915]
Wwp1	chr5	48	33	108.777	72.2773	36.5002	1.505	0.0173536	0.5071	NotSig	0.579025	medium	6.37847	6.8273	5.92965	0.617335	-0.149262	0.86852	0.881347	0.999837	Not Sig	nonsignificant	.	Y	WW domain containing E3 ubiquitin protein ligase 1 [Source:RGD Symbol;Acc:1311734]
Tbk1	chr7	37	23	123.711	67.3113	56.4002	1.8379	0.0184299	0.5071	NotSig	0.549405	medium	8.1515	8.33574	7.96727	0.553451	0.0576421	0.955797	0.954034	0.999837	Not Sig	nonsignificant	.	.	TANK-binding kinase 1 [Source:RGD Symbol;Acc:1588588]
Gpt	chr7	26	40	142.821	89.9859	52.8356	1.58715	0.0188172	0.5071	NotSig	0.643256	medium	9.27119	11.2745	7.2679	0.503694	-1.43064	0.644632	0.152534	0.999837	Not Sig	nonsignificant	.	.	glutamic--pyruvic transaminase [Source:RGD Symbol;Acc:621720]
Twsg1	chr9	45	47	79.8777	117.283	-37.4051	0.681069	0.0175696	0.5071	NotSig	-0.509937	medium	6.86659	7.97586	5.75733	0.606187	-0.63751	0.721845	0.523793	0.999837	Not Sig	nonsignificant	.	.	twisted gastrulation BMP signaling modulator 1 [Source:RGD Symbol;Acc:1311215]
Ino80e	chr1	66	63	57.1277	80.6655	-23.5379	0.708204	0.0191877	0.508742	NotSig	-0.279623	small	14.0098	15.8862	12.1334	0.470041	-0.885926	0.763773	0.375657	0.999837	Not Sig	nonsignificant	.	.	INO80 complex subunit E [Source:RGD Symbol;Acc:1359572]
Spg7	chr19	72	38	86.245	115.671	-29.4256	0.745609	0.0191968	0.508742	NotSig	-0.491646	small	11.4002	10.1614	12.6391	0.47809	0.665386	1.24383	0.505804	0.999837	Not Sig	nonsignificant	.	.	SPG7 matrix AAA peptidase subunit, paraplegin [Source:RGD Symbol;Acc:727940]
Chchd10	chr20	1201	884	69.5097	74.052	-4.54228	0.938661	0.0190623	0.508742	NotSig	-0.104857	negligible	274.523	267.368	281.678	0.135165	0.599557	1.05352	0.548801	0.999837	Not Sig	nonsignificant	.	.	coiled-coil-helix-coiled-coil-helix domain containing 10 [Source:RGD Symbol;Acc:1359417]
St3gal5	chr4	286	217	86.9602	97.6561	-10.6959	0.890474	0.0194385	0.512152	NotSig	-0.21739	small	51.8286	52.4072	51.2501	0.234282	-0.177774	0.977921	0.858901	0.999837	Not Sig	nonsignificant	Y	Y	ST3 beta-galactoside alpha-2,3-sialyltransferase 5 [Source:RGD Symbol;Acc:620875]
Armcx5	chrX	68	35	126.364	93.5725	32.791	1.35043	0.0194818	0.512152	NotSig	0.517132	medium	8.68431	6.97196	10.3967	0.519084	0.88964	1.49121	0.373659	0.999837	Not Sig	nonsignificant	.	.	armadillo repeat containing, X-linked 5 [Source:RGD Symbol;Acc:7586448]
Rchy1	chr14	95	62	102.588	78.7536	23.8342	1.30264	0.0200595	0.516277	NotSig	0.311069	small	18.9679	17.8662	20.0695	0.35883	0.53485	1.12332	0.592754	0.999837	Not Sig	nonsignificant	.	.	ring finger and CHY zinc finger domain containing 1 [Source:RGD Symbol;Acc:1359180]
Tmed9	chr17	187	154	79.8279	94.7363	-14.9084	0.842633	0.0201755	0.516277	NotSig	-0.258792	small	38.2192	39.2918	37.1466	0.248467	-0.329732	0.945403	0.741603	0.999837	Not Sig	nonsignificant	.	.	transmembrane p24 trafficking protein 9 [Source:RGD Symbol;Acc:1307627]
Hars1	chr18	134	106	92.8238	74.1252	18.6986	1.25226	0.020045	0.516277	NotSig	0.291627	small	30.6293	29.4317	31.8269	0.309809	0.173305	1.08138	0.862411	0.999837	Not Sig	nonsignificant	.	.	histidyl-tRNA synthetase 1 [Source:RGD Symbol;Acc:1310695]
Abcg1	chr20	69	45	93.7754	115.205	-21.4295	0.813988	0.0197717	0.516277	NotSig	-0.373174	small	10.4765	9.29052	11.6625	0.501941	0.637323	1.25532	0.523915	0.999837	Not Sig	nonsignificant	.	Y	ATP binding cassette subfamily G member 1 [Source:RGD Symbol;Acc:620294]
Spock2	chr20	618	492	81.6681	89.7074	-8.03935	0.910383	0.0197819	0.516277	NotSig	-0.147522	negligible	23.5854	24.5919	22.579	0.364595	-0.185624	0.918147	0.85274	0.999837	Not Sig	nonsignificant	.	Y	SPARC/osteonectin, cwcv and kazal like domains proteoglycan 2 [Source:RGD Symbol;Acc:1308568]
Ube2j1	chr5	156	130	87.5944	106.485	-18.8902	0.822602	0.0199706	0.516277	NotSig	-0.26102	small	24.3889	26.7415	22.0362	0.320288	-0.876331	0.824044	0.38085	0.999837	Not Sig	nonsignificant	.	Y	ubiquitin-conjugating enzyme E2, J1 [Source:RGD Symbol;Acc:1305067]
Hnrnpll	chr6	70	40	102.74	127.903	-25.1633	0.803263	0.019957	0.516277	NotSig	-0.500951	medium	14.9321	12.4715	17.3928	0.393955	1.26495	1.3946	0.20589	0.999837	Not Sig	nonsignificant	.	Y	heterogeneous nuclear ribonucleoprotein L-like [Source:RGD Symbol;Acc:1305861]
Ly6h	chr7	940	720	86.2254	93.2633	-7.0379	0.924537	0.0200549	0.516277	NotSig	-0.114671	negligible	219.127	223.843	214.41	0.15331	-0.280797	0.957857	0.778866	0.999837	Not Sig	nonsignificant	.	.	lymphocyte antigen 6 family member H [Source:RGD Symbol;Acc:1311896]
Mrpl22	chr10	37	27	96.2102	56.8911	39.3191	1.69113	0.0200879	0.516277	NotSig	0.518291	medium	9.0689	9.09399	9.04382	0.505594	0.155457	0.994483	0.876461	0.999837	Not Sig	nonsignificant	.	.	mitochondrial ribosomal protein L22 [Source:RGD Symbol;Acc:1309277]
Ankrd34a	chr2	49	54	53.877	86.818	-32.9411	0.620574	0.0202688	0.516277	NotSig	-0.393778	small	6.05005	6.2865	5.81361	0.61454	-0.324826	0.924777	0.745313	0.999837	Not Sig	nonsignificant	.	.	ankyrin repeat domain 34A [Source:RGD Symbol;Acc:1308412]
Prxl2b	chr5	77	64	72.91	92.1909	-19.281	0.790858	0.0206111	0.519565	NotSig	-0.433993	small	17.49	17.8767	17.1033	0.359915	-0.249588	0.956739	0.802906	0.999837	Not Sig	nonsignificant	.	.
Baalc	chr7	228	161	92.4723	80.8187	11.6536	1.14419	0.0206621	0.519565	NotSig	0.253607	small	37.0138	31.4397	42.588	0.27774	1.40156	1.35459	0.161046	0.999837	Not Sig	nonsignificant	.	.	BAALC binder of MAP3K1 and KLF4 [Source:RGD Symbol;Acc:628703]
C1qb	chr5	118	78	98.6223	83.4857	15.1366	1.18131	0.0211576	0.530667	NotSig	0.275029	small	23.8044	21.3483	26.2606	0.326663	0.884102	1.2301	0.376641	0.999837	Not Sig	nonsignificant	.	.	complement C1q B chain [Source:RGD Symbol;Acc:2229]
Arid1b	chr1	107	75	83.2046	66.6372	16.5674	1.24862	0.0214576	0.534804	NotSig	0.381756	small	15.1931	15.4193	14.967	0.398803	0.0346008	0.970669	0.972398	0.999837	Not Sig	nonsignificant	.	Y	AT-rich interaction domain 1B [Source:RGD Symbol;Acc:708504]
Ier5	chr13	316	86	100.837	78.8654	21.9719	1.2786	0.02191	0.534804	NotSig	0.270188	small	35.6059	15.6003	55.6114	0.388029	4.56333	3.56476	5.03476e-06	0.0010068	FDR<0.05	upregulated	.	Y	immediate early response 5 [Source:RGD Symbol;Acc:69252]
Trim35	chr15	372	238	103.248	88.5699	14.6781	1.16572	0.0216696	0.534804	NotSig	0.184805	negligible	45.0821	41.6161	48.5482	0.255212	1.12425	1.16657	0.260907	0.999837	Not Sig	nonsignificant	.	.	tripartite motif-containing 35 [Source:RGD Symbol;Acc:1564642]
Gpm6a	chr16	1685	1318	94.1754	100.349	-6.17382	0.938477	0.0216363	0.534804	NotSig	-0.0837753	negligible	323.742	331.866	315.618	0.144997	-0.609355	0.951042	0.542289	0.999837	Not Sig	nonsignificant	.	Y	glycoprotein m6a [Source:RGD Symbol;Acc:631368]
Uqcrfs1	chr17	285	203	86.5958	99.3942	-12.7984	0.871236	0.0215198	0.534804	NotSig	-0.193818	negligible	58.4425	58.0035	58.8815	0.21091	0.210735	1.01514	0.833094	0.999837	Not Sig	nonsignificant	.	.	ubiquinol-cytochrome c reductase, Rieske iron-sulfur polypeptide 1 [Source:RGD Symbol;Acc:628838]
Csnk2a2	chr19	61	47	71.426	95.8976	-24.4717	0.744815	0.0220253	0.534804	NotSig	-0.470825	small	11.8392	11.9662	11.7122	0.43874	-0.111161	0.97878	0.911488	0.999837	Not Sig	nonsignificant	.	.	casein kinase 2 alpha 2 [Source:RGD Symbol;Acc:1306882]
Fto	chr19	151	141	81.7696	100.794	-19.0239	0.811258	0.0220256	0.534804	NotSig	-0.263846	small	24.9333	27.1741	22.6926	0.311452	-0.930591	0.835082	0.352065	0.999837	Not Sig	nonsignificant	.	Y	FTO, alpha-ketoglutarate dependent dioxygenase [Source:RGD Symbol;Acc:1305121]
Tomm34	chr3	139	130	137.525	164.285	-26.7605	0.83711	0.0217619	0.534804	NotSig	-0.266437	small	34.1042	37.107	31.1014	0.273004	-0.934114	0.838154	0.350245	0.999837	Not Sig	nonsignificant	.	.	translocase of outer mitochondrial membrane 34 [Source:RGD Symbol;Acc:1309029]
Lmo3	chr4	143	116	66.3161	82.4223	-16.1061	0.80459	0.0218577	0.534804	NotSig	-0.291305	small	27.8058	27.789	27.8226	0.313523	-0.16567	1.00121	0.868417	0.999837	Not Sig	nonsignificant	.	Y	LIM domain only 3 [Source:RGD Symbol;Acc:1561357]
Arhgap39	chr7	85	62	111.436	83.2164	28.2199	1.33911	0.0218631	0.534804	NotSig	0.370669	small	15.0229	14.6078	15.4379	0.407758	0.176223	1.05683	0.860119	0.999837	Not Sig	nonsignificant	Y	.	Rho GTPase activating protein 39 [Source:RGD Symbol;Acc:1593158]
Mfsd6	chr9	81	56	93.5551	118.465	-24.9097	0.789729	0.0217686	0.534804	NotSig	-0.407702	small	14.8485	15.2757	14.4213	0.437555	-0.0181797	0.944069	0.985496	0.999837	Not Sig	nonsignificant	.	Y	major facilitator superfamily domain containing 6 [Source:RGD Symbol;Acc:1562317]
Ubqln2	chrX	375	330	91.6976	78.5015	13.1961	1.1681	0.0220297	0.534804	NotSig	0.152955	negligible	48.8674	54.1957	43.5391	0.261519	-1.15217	0.803369	0.249253	0.999837	Not Sig	nonsignificant	.	Y	ubiquilin 2 [Source:RGD Symbol;Acc:1563566]
Gla	chrX	72	29	127.485	96.1948	31.2903	1.32528	0.0218331	0.534804	NotSig	0.487281	small	11.4571	8.28742	14.6267	0.459925	1.7975	1.76493	0.0722562	0.999837	Not Sig	nonsignificant	.	.	galactosidase, alpha [Source:RGD Symbol;Acc:1589721]
Emc10	chr1	238	173	97.5671	112.25	-14.6828	0.869196	0.0222496	0.534996	NotSig	-0.23192	small	45.855	43.4461	48.2639	0.234237	0.812516	1.11089	0.416495	0.999837	Not Sig	nonsignificant	.	.	ER membrane protein complex subunit 10 [Source:RGD Symbol;Acc:1303214]
Tbca	chr2	120	77	71.5734	95.7889	-24.2155	0.747199	0.0221147	0.534996	NotSig	-0.36653	small	30.1863	28.9509	31.4216	0.325662	0.453013	1.08534	0.650539	0.999837	Not Sig	nonsignificant	.	.	tubulin folding cofactor A [Source:RGD Symbol;Acc:1311538]
Snd1	chr4	127	96	79.8645	97.3942	-17.5296	0.820013	0.0222552	0.534996	NotSig	-0.264684	small	31.2104	29.8608	32.56	0.29733	0.49312	1.09039	0.621928	0.999837	Not Sig	nonsignificant	.	Y	staphylococcal nuclease and tudor domain containing 1 [Source:RGD Symbol;Acc:631340]
Nedd4	chr8	463	292	66.5428	80.2976	-13.7548	0.828702	0.0221629	0.534996	NotSig	-0.166764	negligible	70.5519	62.1539	78.9499	0.219232	1.44695	1.27023	0.147911	0.999837	Not Sig	nonsignificant	Y	Y	NEDD4 E3 ubiquitin protein ligase [Source:RGD Symbol;Acc:3157]
Rps12	chr1	474	432	71.9375	66.2948	5.64268	1.08512	0.0226819	0.536191	NotSig	0.136154	negligible	34.5712	36.7524	32.39	0.307642	-0.766521	0.881302	0.443366	0.999837	Not Sig	nonsignificant	.	.	ribosomal protein S12 [Source:RGD Symbol;Acc:62024]
Dyrk1b	chr1	39	34	106.381	62.8609	43.52	1.69232	0.0223755	0.536191	NotSig	0.423198	small	6.01365	6.51057	5.51672	0.62381	-0.342821	0.847348	0.731733	0.999837	Not Sig	nonsignificant	.	Y	dual specificity tyrosine phosphorylation regulated kinase 1B [Source:RGD Symbol;Acc:1307223]
P4hb	chr10	201	131	91.2062	76.2957	14.9105	1.19543	0.0227392	0.536191	NotSig	0.21518	small	38.2137	33.9261	42.5014	0.269136	1.33491	1.25277	0.181904	0.999837	Not Sig	nonsignificant	.	Y	prolyl 4-hydroxylase subunit beta [Source:RGD Symbol;Acc:3244]
Shisa4	chr13	297	266	89.7348	97.9154	-8.18064	0.916452	0.0226938	0.536191	NotSig	-0.182073	negligible	6.80619	7.80354	5.80884	0.59362	-0.659317	0.744385	0.509692	0.999837	Not Sig	nonsignificant	.	.	shisa family member 4 [Source:RGD Symbol;Acc:1312041]
Insig1	chr4	438	150	118.29	102.539	15.7516	1.15362	0.0226171	0.536191	NotSig	0.215631	small	62.6127	31.1318	94.0936	0.29962	4.9998	3.02243	5.73884e-07	0.000157794	FDR<0.05	upregulated	.	.	insulin induced gene 1 [Source:RGD Symbol;Acc:708457]
Dcaf13	chr7	32	23	122.272	72.8691	49.4033	1.67797	0.0227238	0.536191	NotSig	0.544115	medium	6.74602	6.78839	6.70366	0.579035	0.0472621	0.987519	0.962304	0.999837	Not Sig	nonsignificant	.	.	DDB1 and CUL4 associated factor 13 [Source:RGD Symbol;Acc:1308458]
Mettl9	chr1	116	105	71.4703	90.436	-18.9657	0.790286	0.0239841	0.536896	NotSig	-0.285097	small	30.6147	33.6682	27.5612	0.288343	-0.854556	0.818612	0.392797	0.999837	Not Sig	nonsignificant	Y	.	methyltransferase like 9 [Source:RGD Symbol;Acc:2311609]
Ptpre	chr1	76	59	70.2441	98.5368	-28.2928	0.712871	0.0240825	0.536896	NotSig	-0.371215	small	12.4394	13.1855	11.6933	0.429015	-0.250343	0.886829	0.802322	0.999837	Not Sig	nonsignificant	Y	Y	protein tyrosine phosphatase, receptor type, E [Source:RGD Symbol;Acc:620771]
Mgat1	chr10	42	47	117.423	93.2257	24.1973	1.25956	0.0240565	0.536896	NotSig	0.44612	small	6.57074	6.29842	6.84306	0.584484	0.152903	1.08647	0.878475	0.999837	Not Sig	nonsignificant	.	.	alpha-1,3-mannosyl-glycoprotein 2-beta-N-acetylglucosaminyltransferase [Source:RGD Symbol;Acc:620097]
Pitpna	chr10	409	306	108.961	98.2386	10.7222	1.10914	0.0234767	0.536896	NotSig	0.181235	negligible	73.4568	72.3403	74.5733	0.202505	0.238103	1.03087	0.811801	0.999837	Not Sig	nonsignificant	.	.	phosphatidylinositol transfer protein, alpha [Source:RGD Symbol;Acc:61885]
Srsf2	chr10	302	137	149.05	126.996	22.0536	1.17366	0.023474	0.536896	NotSig	0.209303	small	61.094	40.952	81.236	0.244308	3.68007	1.98369	0.00023317	0.0265615	FDR<0.05	nonsignificant	.	Y	serine and arginine rich splicing factor 2 [Source:RGD Symbol;Acc:1359422]
Fkbp8	chr16	665	530	78.4414	86.5093	-8.06788	0.90674	0.0233876	0.536896	NotSig	-0.125381	negligible	162.358	164.651	160.065	0.159462	-0.231214	0.972146	0.817149	0.999837	Not Sig	nonsignificant	.	.	FKBP prolyl isomerase 8 [Source:RGD Symbol;Acc:1308670]
Dctn6	chr16	216	175	70.5776	83.5517	-12.974	0.844719	0.0239757	0.536896	NotSig	-0.196935	negligible	52.0875	52.2267	51.9484	0.244597	-0.0372793	0.994672	0.970262	0.999837	Not Sig	nonsignificant	.	.	dynactin subunit 6 [Source:RGD Symbol;Acc:1307549]
Fam155a	chr16	107	65	61.0547	86.9521	-25.8974	0.702165	0.0241363	0.536896	NotSig	-0.324054	small	23.6084	24.323	22.8937	0.367571	0.0750445	0.941237	0.940179	0.999837	Not Sig	nonsignificant	.	Y
Rapgef4	chr3	186	152	108.975	120.503	-11.5274	0.904339	0.0233868	0.536896	NotSig	-0.234537	small	28.996	31.8502	26.1418	0.35646	-0.854998	0.820773	0.392552	0.999837	Not Sig	nonsignificant	.	.	Rap guanine nucleotide exchange factor 4 [Source:RGD Symbol;Acc:621886]
Pip4p2	chr5	91	63	79.4808	105.863	-26.3826	0.750787	0.0238097	0.536896	NotSig	-0.341233	small	17.9866	16.8095	19.1638	0.367605	0.600825	1.14006	0.547956	0.999837	Not Sig	nonsignificant	.	Y	phosphatidylinositol-4,5-bisphosphate 4-phosphatase 2 [Source:RGD Symbol;Acc:1306225]
Zfyve9	chr5	47	22	79.2553	123.935	-44.6796	0.639492	0.023822	0.536896	NotSig	-0.623584	medium	8.0401	5.18547	10.8947	0.60158	1.3273	2.10102	0.184409	0.999837	Not Sig	nonsignificant	.	.	zinc finger FYVE-type containing 9 [Source:RGD Symbol;Acc:1310856]
Maco1	chr5	73	68	68.3869	90.9653	-22.5784	0.751791	0.0232377	0.536896	NotSig	-0.353033	small	13.8428	16.8322	10.8534	0.426649	-1.50531	0.644799	0.132244	0.999837	Not Sig	nonsignificant	.	.	macoilin 1 [Source:RGD Symbol;Acc:1561685]
Togaram1	chr6	47	52	66.3099	103.934	-37.6241	0.638	0.0229692	0.536896	NotSig	-0.482068	small	9.58883	10.8608	8.3169	0.5051	-0.771018	0.765776	0.440696	0.999837	Not Sig	nonsignificant	.	.	TOG array regulator of axonemal microtubules 1 [Source:RGD Symbol;Acc:1310474]
Sqle	chr7	164	89	100.818	85.8455	14.9724	1.17441	0.0236674	0.536896	NotSig	0.319601	small	35.2346	30.921	39.5481	0.294379	1.30043	1.27901	0.193454	0.999837	Not Sig	nonsignificant	.	.	squalene epoxidase [Source:RGD Symbol;Acc:3755]
Atf4	chr7	470	160	139.489	120.785	18.7043	1.15486	0.0236031	0.536896	NotSig	0.233009	small	77.3362	47.5255	107.147	0.253392	4.60641	2.25452	4.09676e-06	0.000844828	FDR<0.05	upregulated	.	Y	activating transcription factor 4 [Source:RGD Symbol;Acc:621863]
Gprasp2	chrX	157	152	91.7838	110.534	-18.7499	0.830369	0.0231142	0.536896	NotSig	-0.294058	small	20.0211	22.3275	17.7146	0.345637	-1.0901	0.793396	0.275671	0.999837	Not Sig	nonsignificant	.	.	G protein-coupled receptor associated sorting protein 2 [Source:RGD Symbol;Acc:1561019]
Psmd11	chr10	106	72	82.0723	102.396	-20.3233	0.801522	0.0241013	0.536896	NotSig	-0.419956	small	17.7002	15.352	20.0483	0.365956	0.939123	1.30591	0.347668	0.999837	Not Sig	nonsignificant	.	Y	proteasome 26S subunit, non-ATPase 11 [Source:RGD Symbol;Acc:1306450]
Ccdc97	chr1	90	69	97.1189	75.3771	21.7418	1.28844	0.0252083	0.543687	NotSig	0.258416	small	12.0617	10.4589	13.6645	0.457289	0.78372	1.30649	0.433205	0.999837	Not Sig	nonsignificant	.	.	coiled-coil domain containing 97 [Source:RGD Symbol;Acc:1309393]
Tm2d3	chr1	97	79	67.5192	82.5274	-15.0082	0.818143	0.0254864	0.543687	NotSig	-0.294483	small	22.9176	22.5053	23.3298	0.325639	0.220365	1.03664	0.825587	0.999837	Not Sig	nonsignificant	Y	.	TM2 domain containing 3 [Source:RGD Symbol;Acc:1564929]
Furin	chr1	60	32	123.584	90.3618	33.2218	1.36765	0.025479	0.543687	NotSig	0.480557	small	8.43655	6.44215	10.4309	0.582536	1.02659	1.61917	0.304614	0.999837	Not Sig	nonsignificant	.	Y	furin (paired basic amino acid cleaving enzyme) [Source:RGD Symbol;Acc:3274]
Gabrg2	chr10	136	126	83.8212	102.404	-18.5831	0.818532	0.025432	0.543687	NotSig	-0.310199	small	6.17976	7.94992	4.4096	0.662665	-1.26026	0.554673	0.207574	0.999837	Not Sig	nonsignificant	.	.	gamma-aminobutyric acid type A receptor subunit gamma 2 [Source:RGD Symbol;Acc:61966]
Usp32	chr10	124	75	100.131	83.9189	16.2122	1.19319	0.0249847	0.543687	NotSig	0.316451	small	19.5217	17.214	21.8294	0.359213	0.798306	1.26812	0.424693	0.999837	Not Sig	nonsignificant	.	.	ubiquitin specific peptidase 32 [Source:RGD Symbol;Acc:1306657]
Cct8	chr11	268	187	84.5105	96.8307	-12.3202	0.872766	0.0251197	0.543687	NotSig	-0.240609	small	55.2832	50.847	59.7195	0.227981	0.817458	1.17449	0.413667	0.999837	Not Sig	nonsignificant	.	Y	chaperonin containing TCP1 subunit 8 [Source:RGD Symbol;Acc:1305452]
LOC100360508	chr13	835	561	59.759	65.1423	-5.38335	0.91736	0.0255475	0.543687	NotSig	-0.121466	negligible	207.296	188.978	225.614	0.154822	1.73796	1.19386	0.0822171	0.999837	Not Sig	nonsignificant	.	.
Dmtn	chr15	237	232	99.0212	113.59	-14.5684	0.871746	0.0253851	0.543687	NotSig	-0.232662	small	57.146	65.5128	48.7793	0.234525	-1.82558	0.744577	0.0679134	0.999837	Not Sig	nonsignificant	.	.	dematin actin binding protein [Source:RGD Symbol;Acc:1311419]
Mvb12a	chr16	29	27	76.3558	121.032	-44.6767	0.63087	0.0246667	0.543687	NotSig	-0.565451	medium	8.3083	9.62022	6.99637	0.535071	-0.754801	0.727257	0.450369	0.999837	Not Sig	nonsignificant	.	.	multivesicular body subunit 12A [Source:RGD Symbol;Acc:735220]
Srsf5	chr6	535	296	134.753	123.418	11.3346	1.09184	0.0246396	0.543687	NotSig	0.141056	negligible	103.308	84.1818	122.434	0.180266	2.77425	1.4544	0.00553288	0.331922	Not Sig	nonsignificant	.	Y	serine and arginine rich splicing factor 5 [Source:RGD Symbol;Acc:3664]
Ccdc59	chr7	32	25	102.806	65.5915	37.2141	1.56736	0.0248596	0.543687	NotSig	0.596885	medium	7.12605	6.87746	7.37464	0.584704	0.274809	1.07229	0.783463	0.999837	Not Sig	nonsignificant	.	Y	coiled-coil domain containing 59 [Source:RGD Symbol;Acc:1311912]
Vrk3	chr1	56	39	84.2456	60.4776	23.768	1.393	0.025373	0.543687	NotSig	0.540944	medium	11.266	10.312	12.22	0.461117	0.369337	1.18503	0.711876	0.999837	Not Sig	nonsignificant	.	.	VRK serine/threonine kinase 3 [Source:RGD Symbol;Acc:1549692]
Phkg2	chr1	57	67	110.169	133.601	-23.4324	0.82461	0.0253366	0.543687	NotSig	-0.353169	small	16.4345	19.124	13.745	0.386101	-1.2249	0.718733	0.220613	0.999837	Not Sig	nonsignificant	.	.	phosphorylase kinase catalytic subunit gamma 2 [Source:RGD Symbol;Acc:620024]
Scn1a	chr3	41	33	86.8835	121.218	-34.3347	0.716753	0.0250646	0.543687	NotSig	-0.564317	medium	7.928	7.8054	8.0506	0.575547	-0.0292851	1.03141	0.976637	0.999837	Not Sig	nonsignificant	.	Y	sodium voltage-gated channel alpha subunit 1 [Source:RGD Symbol;Acc:69364]
Ptbp1	chr7	74	25	152.103	97.1729	54.93	1.56528	0.0251475	0.543687	NotSig	0.575523	medium	9.01848	5.72202	12.3149	0.55733	2.20165	2.1522	0.0276901	0.999837	Not Sig	nonsignificant	Y	Y	polypyrimidine tract binding protein 1 [Source:RGD Symbol;Acc:62047]
Arx	chrX	26	27	45.3277	76.2008	-30.8731	0.594845	0.0249396	0.543687	NotSig	-0.690739	medium	6.0801	6.27857	5.88164	0.629264	-0.0959934	0.936781	0.923526	0.999837	Not Sig	nonsignificant	.	.	aristaless related homeobox [Source:RGD Symbol;Acc:1562672]
Ddx5	chr10	1213	655	120.836	113.497	7.3395	1.06467	0.0257956	0.546488	NotSig	0.0968865	negligible	225.228	176.361	274.095	0.169105	3.64637	1.55417	0.000265974	0.0291625	FDR<0.05	nonsignificant	.	Y	DEAD-box helicase 5 [Source:RGD Symbol;Acc:619906]
Pex14	chr5	73	62	85.7351	110.699	-24.9637	0.77449	0.0259007	0.546488	NotSig	-0.442212	small	16.3608	17.2108	15.5108	0.394921	-0.0756676	0.901227	0.939684	0.999837	Not Sig	nonsignificant	.	.	peroxisomal biogenesis factor 14 [Source:RGD Symbol;Acc:68336]
Scaf8	chr1	47	52	110.036	73.418	36.6176	1.49875	0.0263232	0.553011	NotSig	0.32628	small	11.0209	13.3974	8.64436	0.461806	-1.29451	0.645225	0.195489	0.999837	Not Sig	nonsignificant	.	Y	SR-related CTD-associated factor 8 [Source:RGD Symbol;Acc:708362]
Kat2a	chr10	77	68	67.6119	91.327	-23.7151	0.740328	0.0264953	0.554625	NotSig	-0.426728	small	17.7989	18.0274	17.5705	0.389286	-0.287089	0.974652	0.774044	0.999837	Not Sig	nonsignificant	.	.	lysine acetyltransferase 2A [Source:RGD Symbol;Acc:1307242]
Cygb	chr10	70	47	116.315	135.68	-19.3659	0.857268	0.0267115	0.554625	NotSig	-0.439779	small	10.2626	8.44769	12.0775	0.472596	1.00277	1.42968	0.315974	0.999837	Not Sig	nonsignificant	.	Y	cytoglobin [Source:RGD Symbol;Acc:69415]
Lsm4	chr16	108	76	65.3825	85.0002	-19.6177	0.769204	0.0267384	0.554625	NotSig	-0.316182	small	24.6419	24.6676	24.6162	0.31198	0.0714421	0.997916	0.943046	0.999837	Not Sig	nonsignificant	.	.	LSM4 homolog, U6 small nuclear RNA and mRNA degradation associated [Source:RGD Symbol;Acc:1306808]
Egr4	chr4	1170	16	106.131	63.1135	43.0176	1.68159	0.0265873	0.554625	NotSig	0.59346	medium	103.164	3.21723	203.111	0.865906	6.9337	63.1323	4.09966e-12	3.86481e-09	FDR<0.05	upregulated	.	Y	early growth response 4 [Source:RGD Symbol;Acc:2546]
Scn3b	chr8	437	344	100.056	114.281	-14.2247	0.875529	0.0265997	0.554625	NotSig	-0.14571	negligible	60.6439	66.5595	54.7282	0.226353	-1.13728	0.822244	0.255422	0.999837	Not Sig	nonsignificant	.	.	sodium voltage-gated channel beta subunit 3 [Source:RGD Symbol;Acc:621657]
Txndc11	chr10	37	26	115.577	70.2612	45.3162	1.64497	0.0273873	0.554638	NotSig	0.591816	medium	8.27847	8.8605	7.69644	0.53455	-0.360206	0.868624	0.718693	0.999837	Not Sig	nonsignificant	.	Y	thioredoxin domain containing 11 [Source:RGD Symbol;Acc:1307538]
Tmem254	chr16	57	48	73.9172	97.8486	-23.9314	0.755424	0.0271252	0.554638	NotSig	-0.360791	small	12.8173	12.0879	13.5467	0.419608	0.293792	1.12068	0.768917	0.999837	Not Sig	nonsignificant	.	.	transmembrane protein 254 [Source:RGD Symbol;Acc:1305689]
Bin1	chr18	406	274	90.4957	80.7442	9.75153	1.12077	0.0273189	0.554638	NotSig	0.179043	negligible	82.5674	74.6818	90.453	0.200682	1.34837	1.21118	0.177539	0.999837	Not Sig	nonsignificant	.	.	bridging integrator 1 [Source:RGD Symbol;Acc:621786]
Terf2ip	chr19	143	79	104.182	79.9865	24.1952	1.30249	0.0272646	0.554638	NotSig	0.333882	small	24.9791	22.3229	27.6354	0.390598	0.739165	1.23798	0.459807	0.999837	Not Sig	nonsignificant	.	Y	TERF2 interacting protein [Source:RGD Symbol;Acc:1309684]
Mrps18b	chr20	70	62	81.4802	105.427	-23.9472	0.772856	0.0268434	0.554638	NotSig	-0.399792	small	17.4523	18.2377	16.6669	0.388795	-0.330421	0.91387	0.741082	0.999837	Not Sig	nonsignificant	.	.	mitochondrial ribosomal protein S18B [Source:RGD Symbol;Acc:1302998]
Ctps1	chr5	79	81	82.7634	111.137	-28.3731	0.7447	0.0273472	0.554638	NotSig	-0.392504	small	21.5267	25.5919	17.4615	0.342834	-1.42808	0.682306	0.153269	0.999837	Not Sig	nonsignificant	.	.	CTP synthase 1 [Source:RGD Symbol;Acc:1311060]
St3gal3	chr5	48	66	86.4538	118.702	-32.2484	0.728325	0.0273249	0.554638	NotSig	-0.440235	small	13.6632	17.5606	9.76587	0.423707	-1.87747	0.556123	0.0604537	0.999837	Not Sig	nonsignificant	.	.	ST3 beta-galactoside alpha-2,3-sialyltransferase 3 [Source:RGD Symbol;Acc:68414]
Rsph9	chr9	25	25	70.5971	97.6151	-27.018	0.723219	0.0269205	0.554638	NotSig	-0.491372	small	6.07714	6.38246	5.77182	0.618837	-0.374868	0.904326	0.707758	0.999837	Not Sig	nonsignificant	.	.	radial spoke head component 9 [Source:RGD Symbol;Acc:1310693]
Bcas2	chr2	101	73	98.05	75.5239	22.5261	1.29826	0.0275608	0.555282	NotSig	0.321877	small	24.2418	24.1544	24.3292	0.329997	0.0252683	1.00724	0.979841	0.999837	Not Sig	nonsignificant	.	Y	BCAS2, pre-mRNA processing factor [Source:RGD Symbol;Acc:1306485]
Ncoa6	chr3	44	29	64.3524	108.096	-43.7433	0.595328	0.0275095	0.555282	NotSig	-0.44512	small	7.21886	6.71308	7.72464	0.561089	0.227388	1.15068	0.820122	0.999837	Not Sig	nonsignificant	.	.	nuclear receptor coactivator 6 [Source:RGD Symbol;Acc:620111]
RGD1564664	chr3	1400	84	103.309	86.4151	16.8935	1.19549	0.0278351	0.559114	NotSig	0.227092	small	161.759	18.7458	304.772	0.718578	5.57106	16.2581	2.53197e-08	9.28249e-06	FDR<0.05	upregulated	.	.	similar to LOC387763 protein [Source:RGD Symbol;Acc:1564664]
Ptpn4	chr13	67	52	93.2257	132.396	-39.1702	0.704143	0.0280443	0.561001	NotSig	-0.431132	small	7.18121	7.37431	6.9881	0.623893	-0.0964466	0.947627	0.923166	0.999837	Not Sig	nonsignificant	Y	Y	protein tyrosine phosphatase, non-receptor type 4 [Source:RGD Symbol;Acc:620712]
Aagab	chr8	56	62	80.852	110.783	-29.9307	0.729825	0.0280729	0.561001	NotSig	-0.35946	small	12.7966	16.1639	9.42934	0.473288	-1.43166	0.583359	0.152241	0.999837	Not Sig	nonsignificant	.	.	alpha- and gamma-adaptin binding protein [Source:RGD Symbol;Acc:621601]
Hdhd2	chr18	146	128	95.3413	81.4208	13.9205	1.17097	0.0282078	0.562553	NotSig	0.216388	small	12.582	13.8865	11.2774	0.433113	-0.530375	0.812116	0.595852	0.999837	Not Sig	nonsignificant	.	.
Nsd2	chr14	100	51	71.9895	100.973	-28.9831	0.712961	0.0285538	0.56601	NotSig	-0.333574	small	6.27242	5.74028	6.80455	0.582703	0.279618	1.1854	0.779771	0.999837	Not Sig	nonsignificant	.	Y	nuclear receptor binding SET domain protein 2 [Source:RGD Symbol;Acc:1307955]
Lysmd4	chr1	37	31	73.4214	107.162	-33.7411	0.685141	0.0288236	0.566788	NotSig	-0.444999	small	8.28089	9.9683	6.59348	0.531462	-0.899984	0.661445	0.368129	0.999837	Not Sig	nonsignificant	.	.	LysM domain containing 4 [Source:RGD Symbol;Acc:1592887]
Tspan31	chr7	122	68	79.137	57.4953	21.6416	1.37641	0.0286766	0.566788	NotSig	0.326028	small	24.0127	21.7505	26.2749	0.350307	1.11813	1.20802	0.263512	0.999837	Not Sig	nonsignificant	.	.	tetraspanin 31 [Source:RGD Symbol;Acc:1309876]
Septin6	chrX	35	27	89.3037	119.688	-30.3847	0.746135	0.0287739	0.566788	NotSig	-0.521083	medium	7.24805	7.71194	6.78415	0.567048	-0.212713	0.879695	0.831551	0.999837	Not Sig	nonsignificant	Y	Y	septin 6 [Source:RGD Symbol;Acc:1585082]
LOC100365289	chr14	55	31	89.8236	126.196	-36.3727	0.711777	0.0291612	0.568876	NotSig	-0.618021	medium	10.0588	9.02158	11.096	0.503885	0.40988	1.22994	0.681894	0.999837	Not Sig	nonsignificant	.	.
Zc4h2	chrX	35	16	73.354	117.874	-44.5204	0.622307	0.0290769	0.568876	NotSig	-0.908102	large	6.91806	6.76852	7.06759	0.615996	0.185631	1.04418	0.852734	0.999837	Not Sig	nonsignificant	.	.	zinc finger C4H2-type containing [Source:RGD Symbol;Acc:1561708]
Hcfc1	chrX	92	83	105.85	77.0459	28.8036	1.37385	0.0293706	0.571824	NotSig	0.294221	small	16.0145	16.7255	15.3036	0.400098	-0.438669	0.914986	0.660901	0.999837	Not Sig	nonsignificant	.	Y	host cell factor C1 [Source:RGD Symbol;Acc:1563804]
Fgfr1	chr16	340	183	109.192	94.667	14.5255	1.15344	0.0296986	0.574797	NotSig	0.161858	negligible	57.7749	44.8893	70.6605	0.283445	2.42929	1.57411	0.0151283	0.745318	Not Sig	nonsignificant	Y	.	Fibroblast growth factor receptor 1 [Source:RGD Symbol;Acc:620713]
Acp2	chr3	35	50	107.231	75.5732	31.6574	1.4189	0.0296668	0.574797	NotSig	0.496947	small	9.16311	12.0542	6.27203	0.519734	-1.6901	0.52032	0.091009	0.999837	Not Sig	nonsignificant	.	Y	acid phosphatase 2, lysosomal [Source:RGD Symbol;Acc:2021]
Lzts3	chr3	228	203	78.1039	97.0747	-18.9708	0.804575	0.02995	0.575133	NotSig	-0.202464	small	27.7448	28.411	27.0786	0.297993	-0.136998	0.953102	0.891032	0.999837	Not Sig	nonsignificant	.	Y	leucine zipper tumor suppressor family member 3 [Source:RGD Symbol;Acc:631327]
RGD1597339	chr1	29	24	75.2628	45.9655	29.2973	1.63737	0.0298927	0.575133	NotSig	0.454418	small	5.96303	6.25514	5.67092	0.613117	-0.110554	0.906603	0.91197	0.999837	Not Sig	nonsignificant	.	Y
Wdr45b	chr10	111	62	129.01	104.798	24.2123	1.23104	0.0301191	0.577055	NotSig	0.29824	small	7.3607	5.78264	8.93876	0.551577	1.05872	1.54579	0.289727	0.999837	Not Sig	nonsignificant	.	Y	WD repeat domain 45B [Source:RGD Symbol;Acc:1305141]
Chrm3	chr17	72	63	80.3462	52.0833	28.2629	1.54265	0.0301674	0.577055	NotSig	0.420114	small	9.27222	9.06301	9.48144	0.490385	0.0535546	1.04617	0.95729	0.999837	Not Sig	nonsignificant	.	Y	cholinergic receptor, muscarinic 3 [Source:RGD Symbol;Acc:2343]
Tm2d2	chr16	161	120	77.995	93.5022	-15.5072	0.834151	0.0303575	0.579564	NotSig	-0.239774	small	35.4059	33.5465	37.2654	0.262663	0.481582	1.11086	0.630103	0.999837	Not Sig	nonsignificant	.	Y	TM2 domain containing 2 [Source:RGD Symbol;Acc:1306769]
Dusp3	chr10	233	182	90.2834	107.986	-17.7024	0.836067	0.0306369	0.580785	NotSig	-0.251609	small	36.5965	40.1294	33.0636	0.284251	-0.863947	0.823925	0.387617	0.999837	Not Sig	nonsignificant	.	.	dual specificity phosphatase 3 [Source:RGD Symbol;Acc:1560049]
Slc2a6	chr3	40	33	94.0295	128.459	-34.4299	0.731978	0.0306578	0.580785	NotSig	-0.541874	medium	10.3785	10.9627	9.7944	0.509569	-0.0185644	0.893432	0.985189	0.999837	Not Sig	nonsignificant	.	.	solute carrier family 2 member 6 [Source:RGD Symbol;Acc:1309317]
Wdr20	chr6	38	30	61.6515	109.31	-47.6589	0.564004	0.030647	0.580785	NotSig	-0.450109	small	6.72898	6.44824	7.00971	0.5847	0.0802056	1.08707	0.936074	0.999837	Not Sig	nonsignificant	.	Y	WD repeat domain 20 [Source:RGD Symbol;Acc:1306499]
Unc50	chr9	58	58	71.8811	107.843	-35.9621	0.666533	0.0308394	0.583101	NotSig	-0.357665	small	16.9642	19.9591	13.9693	0.382472	-1.08487	0.699894	0.27798	0.999837	Not Sig	nonsignificant	.	.	unc-50 inner nuclear membrane RNA binding protein [Source:RGD Symbol;Acc:621749]
Palm	chr7	254	213	73.2041	86.4397	-13.2357	0.84688	0.0309308	0.583708	NotSig	-0.195332	negligible	37.3841	40.3473	34.4209	0.290242	-0.815536	0.853115	0.414766	0.999837	Not Sig	nonsignificant	.	.	paralemmin [Source:RGD Symbol;Acc:620341]
Sema4d	chr17	60	42	90.2998	122.079	-31.7791	0.739684	0.0311141	0.584921	NotSig	-0.478824	small	11.7383	9.72609	13.7505	0.474124	0.779405	1.41378	0.435741	0.999837	Not Sig	nonsignificant	.	.	semaphorin 4D [Source:RGD Symbol;Acc:1310554]
Becn1	chr10	189	169	80.1144	94.4924	-14.3781	0.847839	0.031284	0.585875	NotSig	-0.251072	small	51.3104	54.8575	47.7633	0.225527	-0.926387	0.870679	0.354245	0.999837	Not Sig	nonsignificant	.	Y	beclin 1 [Source:RGD Symbol;Acc:620190]
Camta2	chr10	463	376	86.5917	98.9599	-12.3683	0.875017	0.0328402	0.590384	NotSig	-0.155484	negligible	106.441	108.813	104.068	0.178785	-0.418722	0.956388	0.675419	0.999837	Not Sig	nonsignificant	.	.	calmodulin binding transcription activator 2 [Source:RGD Symbol;Acc:1311296]
Dnajb11	chr11	94	61	97.8073	76.0951	21.7122	1.28533	0.0322816	0.590384	NotSig	0.442193	small	18.9841	16.7403	21.2278	0.407358	0.565454	1.26807	0.571765	0.999837	Not Sig	nonsignificant	Y	.	DnaJ heat shock protein family (Hsp40) member B11 [Source:RGD Symbol;Acc:1307373]
Zcchc24	chr16	97	79	105.446	81.382	24.0643	1.2957	0.0325784	0.590384	NotSig	0.276204	small	7.07754	8.95051	5.20457	0.58682	-1.44579	0.581483	0.148237	0.999837	Not Sig	nonsignificant	.	.	zinc finger CCHC-type containing 24 [Source:RGD Symbol;Acc:1306164]
Nr2f6	chr16	80	58	61.9533	81.9198	-19.9665	0.756268	0.0323857	0.590384	NotSig	-0.389606	small	19.3028	17.7963	20.8093	0.351689	0.37836	1.1693	0.705164	0.999837	Not Sig	nonsignificant	.	.	nuclear receptor subfamily 2, group F, member 6 [Source:RGD Symbol;Acc:621685]
Etf1	chr18	183	89	97.3108	76.2367	21.0742	1.27643	0.0321031	0.590384	NotSig	0.312827	small	23.914	19.2314	28.5965	0.346022	1.53669	1.48697	0.12437	0.999837	Not Sig	nonsignificant	.	Y	eukaryotic translation termination factor 1 [Source:RGD Symbol;Acc:1305712]
Zfp131	chr2	54	41	103.769	62.3815	41.3879	1.66346	0.0319237	0.590384	NotSig	0.440357	small	10.8288	10.8191	10.8385	0.470755	0.0541477	1.00179	0.956817	0.999837	Not Sig	nonsignificant	Y	.	zinc finger protein 131 [Source:RGD Symbol;Acc:1307638]
LOC100361008	chr3	11	14	91.2378	155.793	-64.5549	0.585636	0.0327233	0.590384	NotSig	-1.0364	large	19.0637	14.4542	23.6733	0.460948	1.78769	1.63782	0.0738257	0.999837	Not Sig	nonsignificant	.	.	Cytochrome c oxidase subunit 5A, mitochondrial-like [Source:RGD Symbol;Acc:2320952]
Gabarapl1	chr4	854	645	75.1722	79.3771	-4.20492	0.947026	0.0327604	0.590384	NotSig	-0.132584	negligible	147.752	148.694	146.809	0.197666	-0.191723	0.987322	0.847959	0.999837	Not Sig	nonsignificant	.	.	GABA type A receptor associated protein like 1 [Source:RGD Symbol;Acc:1596143]
Gpr19	chr4	41	13	80.7875	37.3395	43.4479	2.16359	0.031973	0.590384	NotSig	0.533045	medium	5.9907	2.71178	9.26963	0.682387	2.18188	3.41828	0.0291184	0.999837	Not Sig	nonsignificant	.	Y	G protein-coupled receptor 19 [Source:RGD Symbol;Acc:71045]
Cptp	chr5	52	34	74.3123	106.529	-32.2172	0.697575	0.0329058	0.590384	NotSig	-0.536294	medium	9.88257	9.96474	9.80041	0.479436	0.00994194	0.983509	0.992068	0.999837	Not Sig	nonsignificant	.	.	ceramide-1-phosphate transfer protein [Source:RGD Symbol;Acc:1359656]
Lrrn3	chr6	134	49	112.776	89.6492	23.1269	1.25797	0.0327375	0.590384	NotSig	0.370192	small	14.38	7.82285	20.9372	0.465572	2.79069	2.67641	0.00525961	0.318985	Not Sig	nonsignificant	.	.	leucine rich repeat neuronal 3 [Source:RGD Symbol;Acc:71066]
Spryd3	chr7	276	223	84.6604	96.5341	-11.8737	0.877	0.0322001	0.590384	NotSig	-0.152617	negligible	52.6773	53.0817	52.273	0.229961	0.0775833	0.984766	0.93816	0.999837	Not Sig	nonsignificant	.	.	SPRY domain containing 3 [Source:RGD Symbol;Acc:1561500]
Myrip	chr8	39	41	84.2635	112.228	-27.965	0.750821	0.0325877	0.590384	NotSig	-0.495782	small	7.8037	9.79359	5.81381	0.573036	-1.16359	0.593634	0.244589	0.999837	Not Sig	nonsignificant	Y	.	myosin VIIA and Rab interacting protein [Source:RGD Symbol;Acc:727731]
Bex4	chrX	36	17	60.6126	105.593	-44.98	0.574023	0.0328014	0.590384	NotSig	-0.733675	medium	6.8546	4.85908	8.85011	0.582012	1.33339	1.82136	0.182404	0.999837	Not Sig	nonsignificant	.	.	brain expressed, X-linked 4 [Source:RGD Symbol;Acc:1564749]
Poll	chr1	43	49	55.7654	82.8443	-27.0789	0.673135	0.0320034	0.590384	NotSig	-0.429462	small	12.601	15.1839	10.0181	0.423767	-1.23623	0.659785	0.216374	0.999837	Not Sig	nonsignificant	.	.	DNA polymerase lambda [Source:RGD Symbol;Acc:1308053]
L1cam	chrX	104	80	132.633	108.994	23.6392	1.21688	0.0330153	0.590817	NotSig	0.28061	small	19.9684	20.9188	19.0179	0.356171	-0.194288	0.909131	0.845951	0.999837	Not Sig	nonsignificant	.	Y	L1 cell adhesion molecule [Source:RGD Symbol;Acc:619777]
Frrs1l	chr5	232	216	87.4819	99.6627	-12.1808	0.87778	0.0332968	0.590928	NotSig	-0.233197	small	16.7232	16.1761	17.2704	0.400776	0.172001	1.06765	0.863436	0.999837	Not Sig	nonsignificant	Y	Y	ferric-chelate reductase 1-like [Source:RGD Symbol;Acc:1309978]
Ndel1	chr10	152	71	102.437	77.9129	24.5236	1.31476	0.03363	0.591929	NotSig	0.314868	small	23.2672	16.286	30.2483	0.341792	2.47095	1.85732	0.0134755	0.684037	Not Sig	nonsignificant	.	Y	nudE neurodevelopment protein 1-like 1 [Source:RGD Symbol;Acc:621235]
Ufc1	chr13	192	159	86.1394	76.0492	10.0901	1.13268	0.0334364	0.591929	NotSig	0.208212	small	44.6541	44.4248	44.8833	0.252667	-0.168249	1.01032	0.866388	0.999837	Not Sig	nonsignificant	.	.	ubiquitin-fold modifier conjugating enzyme 1 [Source:RGD Symbol;Acc:1303313]
Gabbr2	chr5	291	244	97.6054	83.2176	14.3878	1.17289	0.0338348	0.591929	NotSig	0.174788	negligible	45.7204	43.8783	47.5624	0.245074	0.405965	1.08396	0.684768	0.999837	Not Sig	nonsignificant	.	.	gamma-aminobutyric acid type B receptor subunit 2 [Source:RGD Symbol;Acc:619864]
Rab21	chr7	131	87	106.272	86.8118	19.4607	1.22417	0.0336976	0.591929	NotSig	0.308382	small	19.0352	17.3011	20.7694	0.370237	0.649058	1.20047	0.516301	0.999837	Not Sig	nonsignificant	.	.	RAB21, member RAS oncogene family [Source:RGD Symbol;Acc:1303150]
Btbd8	chr14	185	63	119.403	95.9264	23.4763	1.24473	0.0339271	0.59249	NotSig	0.317195	small	17.3837	10.6641	24.1033	0.43672	2.57704	2.26023	0.00996494	0.547989	Not Sig	nonsignificant	.	Y	BTB domain containing 8 [Source:RGD Symbol;Acc:2321418]
Cyfip1	chr1	115	90	111.976	91.6381	20.3379	1.22194	0.0344238	0.598932	NotSig	0.315849	small	25.1324	26.9947	23.2701	0.320421	-0.538954	0.862022	0.589918	0.999837	Not Sig	nonsignificant	.	.	cytoplasmic FMR1 interacting protein 1 [Source:RGD Symbol;Acc:1310332]
Septin5	chr11	1390	1039	95.4829	101.723	-6.23999	0.938657	0.034527	0.598932	NotSig	-0.0954737	negligible	91.9638	88.8012	95.1264	0.262942	0.364042	1.07123	0.715827	0.999837	Not Sig	nonsignificant	.	.	septin 5 [Source:RGD Symbol;Acc:621763]
Csnk1a1	chr18	501	298	102.833	92.8738	9.95923	1.10723	0.0348217	0.598932	NotSig	0.187379	negligible	79.5548	65.5943	93.5153	0.204845	2.33446	1.42566	0.0195716	0.922522	Not Sig	nonsignificant	Y	Y	casein kinase 1, alpha 1 [Source:RGD Symbol;Acc:71098]
Chn1	chr3	1291	980	85.856	91.4143	-5.55828	0.939197	0.0349514	0.598932	NotSig	-0.0847055	negligible	283.629	269.285	297.973	0.160939	0.741799	1.10653	0.458209	0.999837	Not Sig	nonsignificant	.	.	chimerin 1 [Source:RGD Symbol;Acc:620139]
Cops7a	chr4	206	170	89.3391	99.5917	-10.2525	0.897054	0.034461	0.598932	NotSig	-0.236874	small	46.543	47.6413	45.4448	0.240675	-0.277516	0.953895	0.781384	0.999837	Not Sig	nonsignificant	.	Y	COP9 signalosome subunit 7A [Source:RGD Symbol;Acc:1310070]
Fxyd6	chr8	54	49	91.3345	109.014	-17.6798	0.837821	0.0345766	0.598932	NotSig	-0.444742	small	11.1504	12.9085	9.39222	0.468929	-0.990276	0.727598	0.322039	0.999837	Not Sig	nonsignificant	.	.	FXYD domain-containing ion transport regulator 6 [Source:RGD Symbol;Acc:69315]
Snrpb2	chr3	39	39	67.4832	98.1437	-30.6605	0.687596	0.0349662	0.598932	NotSig	-0.557952	medium	10.5071	10.8762	10.1379	0.469039	-0.239796	0.932119	0.810488	0.999837	Not Sig	nonsignificant	.	Y	small nuclear ribonucleoprotein polypeptide B2 [Source:RGD Symbol;Acc:1310194]
Hmg20b	chr7	26	22	75.5993	119.803	-44.2037	0.63103	0.034772	0.598932	NotSig	-0.384342	small	6.37421	6.2198	6.52862	0.638171	0.0279249	1.04965	0.977722	0.999837	Not Sig	nonsignificant	.	.	high mobility group 20 B [Source:RGD Symbol;Acc:1309235]
Cd47	chr11	207	156	89.2804	103.21	-13.93	0.865033	0.0352289	0.602024	NotSig	-0.188192	negligible	27.7543	24.4517	31.0569	0.35882	0.858498	1.27013	0.390617	0.999837	Not Sig	nonsignificant	.	Y	Cd47 molecule [Source:RGD Symbol;Acc:2308]
Snx7	chr2	41	42	90.3066	55.2858	35.0208	1.63345	0.0353685	0.602024	NotSig	0.50654	medium	12.5204	15.7352	9.30571	0.447467	-1.40168	0.591395	0.161012	0.999837	Not Sig	nonsignificant	.	.	sorting nexin 7 [Source:RGD Symbol;Acc:1305480]
Tra2a	chr4	49	46	119.668	169.505	-49.8367	0.705986	0.0353915	0.602024	NotSig	-0.425748	small	11.9281	13.1839	10.6724	0.440322	-0.686426	0.809497	0.492444	0.999837	Not Sig	nonsignificant	Y	.	transformer 2 alpha [Source:RGD Symbol;Acc:1562563]
Tmod1	chr5	31	25	115.533	78.3677	37.1654	1.47424	0.0355822	0.60318	NotSig	0.646948	medium	6.46139	6.49164	6.43114	0.593929	-0.133111	0.99068	0.894106	0.999837	Not Sig	nonsignificant	.	.	tropomodulin 1 [Source:RGD Symbol;Acc:3874]
Rtcb	chr7	117	100	104.659	89.1756	15.4836	1.17363	0.0355614	0.60318	NotSig	0.272101	small	27.9291	29.3934	26.4649	0.310391	-0.36252	0.900369	0.716964	0.999837	Not Sig	nonsignificant	.	.	RNA 2',3'-cyclic phosphate and 5'-OH ligase [Source:RGD Symbol;Acc:1303261]
Chgb	chr3	782	526	91.0648	84.265	6.79975	1.08069	0.0358282	0.603457	NotSig	0.13021	negligible	113.544	102.077	125.01	0.186438	1.45551	1.22467	0.145527	0.999837	Not Sig	nonsignificant	.	.	chromogranin B [Source:RGD Symbol;Acc:2339]
Slc2a13	chr7	159	134	102.869	82.2549	20.6136	1.25061	0.0358118	0.603457	NotSig	0.204542	small	18.0179	19.6605	16.3752	0.381854	-0.759179	0.8329	0.447745	0.999837	Not Sig	nonsignificant	.	Y	solute carrier family 2 member 13 [Source:RGD Symbol;Acc:621814]
Ppp1r16a	chr7	62	49	90.9195	69.1785	21.741	1.31427	0.0360301	0.60364	NotSig	0.352894	small	13.6726	12.8013	14.5439	0.437172	0.222737	1.13613	0.82374	0.999837	Not Sig	nonsignificant	.	.	protein phosphatase 1, regulatory subunit 16A [Source:RGD Symbol;Acc:1307962]
Cept1	chr2	72	52	76.5605	100.315	-23.7544	0.763202	0.0360391	0.60364	NotSig	-0.44522	small	14.9222	13.7083	16.136	0.401723	0.34714	1.17709	0.728486	0.999837	Not Sig	nonsignificant	.	Y	choline/ethanolamine phosphotransferase 1 [Source:RGD Symbol;Acc:1359727]
Fus	chr1	175	117	108.267	83.6478	24.6194	1.29432	0.0364546	0.6042	NotSig	0.215887	small	46.0322	41.5604	50.5039	0.267324	0.851138	1.21519	0.394693	0.999837	Not Sig	nonsignificant	.	Y	Fus RNA binding protein [Source:RGD Symbol;Acc:1308864]
Sprn	chr1	219	205	83.8792	98.3276	-14.4484	0.853059	0.0368568	0.6042	NotSig	-0.195091	negligible	30.8516	34.8594	26.8438	0.300217	-1.18637	0.770058	0.235478	0.999837	Not Sig	nonsignificant	.	.	shadow of prion protein [Source:RGD Symbol;Acc:1561845]
Ubb	chr10	5311	3590	92.5717	90.5697	2.00208	1.02211	0.0363853	0.6042	NotSig	0.0566972	negligible	1031.21	953.877	1108.55	0.102896	2.13345	1.16215	0.032888	0.999837	Not Sig	nonsignificant	.	.	ubiquitin B [Source:RGD Symbol;Acc:621562]
Vps37b	chr12	70	41	84.4489	54.6524	29.7964	1.5452	0.0366419	0.6042	NotSig	0.427821	small	8.50431	6.2664	10.7422	0.542854	1.18525	1.71426	0.235917	0.999837	Not Sig	nonsignificant	.	.	VPS37B subunit of ESCRT-I [Source:RGD Symbol;Acc:1304576]
Uqcr10	chr14	675	501	88.5141	94.8223	-6.30822	0.933473	0.0369329	0.6042	NotSig	-0.134144	negligible	156.933	158.638	155.228	0.16116	-0.133599	0.978502	0.893719	0.999837	Not Sig	nonsignificant	.	.	ubiquinol-cytochrome c reductase, complex III subunit X [Source:RGD Symbol;Acc:1595126]
LOC100362814	chr3	104	84	80.3305	107.303	-26.9728	0.74863	0.0369118	0.6042	NotSig	-0.272125	small	6.85167	7.01498	6.68836	0.684526	0.157275	0.95344	0.875028	0.999837	Not Sig	nonsignificant	.	Y	RIKEN cDNA D430041D05 gene [Source:MGI Symbol;Acc:MGI:2181743]
Zhx3	chr3	129	99	90.0912	71.9214	18.1698	1.25263	0.0367521	0.6042	NotSig	0.288838	small	13.0977	13.5393	12.6561	0.45686	-0.102935	0.934763	0.918015	0.999837	Not Sig	nonsignificant	.	Y	zinc fingers and homeoboxes 3 [Source:RGD Symbol;Acc:631431]
Gdap1	chr5	90	82	82.0821	104.032	-21.9503	0.789005	0.0363942	0.6042	NotSig	-0.31651	small	14.3617	15.8317	12.8918	0.427342	-0.663025	0.814307	0.507315	0.999837	Not Sig	nonsignificant	.	.	ganglioside-induced differentiation-associated-protein 1 [Source:RGD Symbol;Acc:1309005]
Nr4a3	chr5	233	42	100.181	80.1935	19.9873	1.24924	0.0369062	0.6042	NotSig	0.35608	small	23.0591	6.93279	39.1855	0.787062	3.22288	5.65219	0.00126908	0.0976957	Not Sig	nonsignificant	.	.	nuclear receptor subfamily 4, group A, member 3 [Source:RGD Symbol;Acc:61882]
Nptxr	chr7	1614	1205	116.395	110.55	5.84522	1.05287	0.0363958	0.6042	NotSig	0.0773115	negligible	142.48	140.831	144.128	0.432961	0.106792	1.02341	0.914954	0.999837	Not Sig	nonsignificant	.	Y	neuronal pentraxin receptor [Source:RGD Symbol;Acc:628898]
Mrpl23	chr1	74	79	59.2655	75.2507	-15.9852	0.787574	0.0369192	0.6042	NotSig	-0.374096	small	22.8041	24.779	20.8291	0.351685	-0.440493	0.840595	0.65958	0.999837	Not Sig	nonsignificant	.	.	mitochondrial ribosomal protein L23 [Source:RGD Symbol;Acc:68343]
Zfp280d	chr8	47	47	94.9533	131.03	-36.0764	0.72467	0.0361937	0.6042	NotSig	-0.386809	small	9.34625	10.7872	7.90534	0.501103	-0.866802	0.732846	0.386051	0.999837	Not Sig	nonsignificant	.	Y	zinc finger protein 280D [Source:RGD Symbol;Acc:1560796]
Fgfr2	chr1	59	50	97.6504	66.2323	31.4181	1.47436	0.0375404	0.60551	NotSig	0.434708	small	9.63391	10.3632	8.90457	0.5614	-0.65143	0.859245	0.514769	0.999837	Not Sig	nonsignificant	.	Y	fibroblast growth factor receptor 2 [Source:RGD Symbol;Acc:2611]
Kdm2a	chr1	51	39	62.9268	104.447	-41.5201	0.602477	0.0374809	0.60551	NotSig	-0.446877	small	6.14838	5.22953	7.06724	0.624589	0.751643	1.35141	0.452266	0.999837	Not Sig	nonsignificant	Y	.	lysine demethylase 2A [Source:RGD Symbol;Acc:1309419]
Flii	chr10	56	28	116.264	69.648	46.6162	1.66931	0.0372418	0.60551	NotSig	0.449624	small	11.0005	8.80161	13.1994	0.460869	1.06092	1.49965	0.288727	0.999837	Not Sig	nonsignificant	.	.	FLII, actin remodeling protein [Source:RGD Symbol;Acc:1307590]
Stard3nl	chr17	96	102	76.1038	108.931	-32.8268	0.698645	0.0375592	0.60551	NotSig	-0.19241	negligible	30.786	37.025	24.5469	0.327977	-1.60636	0.662982	0.108194	0.999837	Not Sig	nonsignificant	Y	Y	STARD3 N-terminal like [Source:RGD Symbol;Acc:1308633]
Maoa	chrX	69	49	97.9288	74.243	23.6857	1.31903	0.0371937	0.60551	NotSig	0.369147	small	11.1693	10.6954	11.6431	0.453624	0.087079	1.0886	0.930609	0.999837	Not Sig	nonsignificant	.	.	monoamine oxidase A [Source:RGD Symbol;Acc:61898]
Atic	chr9	50	31	67.5006	101.99	-34.4893	0.661836	0.0375673	0.60551	NotSig	-0.502827	medium	11.0733	10.6236	11.523	0.467123	0.405744	1.08467	0.684931	0.999837	Not Sig	nonsignificant	.	.	5-aminoimidazole-4-carboxamide ribonucleotide formyltransferase/IMP cyclohydrolase [Source:RGD Symbol;Acc:70879]
Polr3e	chr1	29	16	126.352	81.6127	44.7392	1.54819	0.0379929	0.608382	NotSig	0.546023	medium	6.03706	6.62375	5.45037	0.653752	-0.130008	0.822853	0.89656	0.999837	Not Sig	nonsignificant	.	.	RNA polymerase III subunit E [Source:RGD Symbol;Acc:1308086]
Snn	chr10	270	249	96.7344	110.868	-14.134	0.872515	0.0382928	0.611192	NotSig	-0.19025	negligible	38.7715	40.3013	37.2417	0.282341	-0.538796	0.924082	0.590027	0.999837	Not Sig	nonsignificant	.	Y	stannin [Source:RGD Symbol;Acc:3730]
Dtna	chr18	124	82	93.4267	74.3271	19.0996	1.25697	0.038431	0.612405	NotSig	0.26293	small	22.7684	19.3299	26.2068	0.332925	1.16549	1.35577	0.243822	0.999837	Not Sig	nonsignificant	.	Y	dystrobrevin, alpha [Source:RGD Symbol;Acc:1561985]
Rtn4rl2	chr3	301	97	81.8148	64.485	17.3297	1.26874	0.0385003	0.612516	NotSig	0.253577	small	39.0874	21.5058	56.669	0.671145	2.1041	2.63506	0.0353699	0.999837	Not Sig	nonsignificant	.	.	reticulon 4 receptor-like 2 [Source:RGD Symbol;Acc:727797]
Ctr9	chr1	62	58	114.516	79.0745	35.4415	1.4482	0.0387743	0.614763	NotSig	0.352525	small	13.3242	13.7697	12.8786	0.408883	-0.307357	0.93528	0.758572	0.999837	Not Sig	nonsignificant	.	.	CTR9 homolog, Paf1/RNA polymerase II complex component [Source:RGD Symbol;Acc:1311097]
Dcaf7	chr10	114	109	107.731	90.1261	17.6053	1.19534	0.0395173	0.614763	NotSig	0.252523	small	11.3801	12.818	9.94227	0.544701	-0.673693	0.775651	0.500506	0.999837	Not Sig	nonsignificant	.	Y	DDB1 and CUL4 associated factor 7 [Source:RGD Symbol;Acc:1305140]
Snx25	chr16	38	21	83.5966	129.223	-45.6259	0.64692	0.0395733	0.614763	NotSig	-0.547694	medium	7.05889	5.74028	8.37751	0.57805	0.750756	1.45942	0.4528	0.999837	Not Sig	nonsignificant	.	Y	sorting nexin 25 [Source:RGD Symbol;Acc:1310150]
Mtmr7	chr16	45	44	95.3701	128.968	-33.5976	0.739488	0.0390176	0.614763	NotSig	-0.439417	small	11.0531	12.1668	9.93932	0.445864	-0.576078	0.816921	0.564562	0.999837	Not Sig	nonsignificant	.	.	myotubularin related protein 7 [Source:RGD Symbol;Acc:1306608]
M6pr	chr4	141	123	79.8536	64.3151	15.5386	1.2416	0.0393666	0.614763	NotSig	0.184183	negligible	32.5075	33.7586	31.2564	0.302688	-0.58443	0.925878	0.558931	0.999837	Not Sig	nonsignificant	Y	Y	mannose-6-phosphate receptor, cation dependent [Source:RGD Symbol;Acc:1359355]
Ankrd46	chr7	304	211	101.598	91.0236	10.5741	1.11617	0.0395794	0.614763	NotSig	0.166068	negligible	58.0693	53.7746	62.3639	0.217686	0.778121	1.15973	0.436498	0.999837	Not Sig	nonsignificant	.	.	ankyrin repeat domain 46 [Source:RGD Symbol;Acc:1309382]
Coro2b	chr8	215	174	83.6896	99.3065	-15.6169	0.84274	0.0394317	0.614763	NotSig	-0.203012	small	37.9125	38.9641	36.861	0.27595	-0.110301	0.946024	0.912171	0.999837	Not Sig	nonsignificant	.	.	coronin 2B [Source:RGD Symbol;Acc:1561953]
Eola2	chrX	33	31	76.243	107.585	-31.3424	0.708674	0.0391893	0.614763	NotSig	-0.548782	medium	8.15185	8.25896	8.04474	0.522554	-0.221033	0.974062	0.825067	0.999837	Not Sig	nonsignificant	.	.	endothelium and lymphocyte associated ASCH domain 2 [Source:RGD Symbol;Acc:1562747]
Vstm2b	chr1	29	23	70.0204	107.265	-37.2443	0.652782	0.0390344	0.614763	NotSig	-0.576269	medium	8.10639	8.38363	7.82915	0.544263	-0.100364	0.933862	0.920055	0.999837	Not Sig	nonsignificant	.	.	V-set and transmembrane domain containing 2B [Source:RGD Symbol;Acc:1306235]
Suds3	chr12	147	98	93.0438	110.521	-17.4774	0.841864	0.0397412	0.615331	NotSig	-0.247736	small	25.687	22.7426	28.6313	0.313274	0.963034	1.25893	0.33553	0.999837	Not Sig	nonsignificant	Y	.	SDS3 homolog, SIN3A corepressor complex component [Source:RGD Symbol;Acc:1305986]
Ap3s2	chr1	75	69	79.3949	105.728	-26.3331	0.750936	0.0404006	0.61624	NotSig	-0.360674	small	18.9148	18.8496	18.9799	0.362584	-0.0741594	1.00691	0.940884	0.999837	Not Sig	nonsignificant	.	.	adaptor related protein complex 3 subunit sigma 2 [Source:RGD Symbol;Acc:1586888]
Cttn	chr1	149	109	101.698	117.659	-15.9613	0.864343	0.0408915	0.61624	NotSig	-0.259154	small	29.1517	27.9222	30.3811	0.291071	0.464132	1.08806	0.642553	0.999837	Not Sig	nonsignificant	.	.	cortactin [Source:RGD Symbol;Acc:619839]
Rin1	chr1	115	84	90.4096	69.7606	20.649	1.296	0.0409804	0.61624	NotSig	0.307818	small	10.12	8.39488	11.845	0.479914	0.907569	1.41098	0.364106	0.999837	Not Sig	nonsignificant	.	.	Ras and Rab interactor 1 [Source:RGD Symbol;Acc:620006]
Masp1	chr11	34	20	93.4426	68.9477	24.4949	1.35527	0.0411265	0.61624	NotSig	0.361139	small	6.42671	6.03358	6.81983	0.586326	0.332169	1.13031	0.739762	0.999837	Not Sig	nonsignificant	.	Y	MBL associated serine protease 1 [Source:RGD Symbol;Acc:620213]
Mbp	chr18	4865	3123	90.166	87.0865	3.07954	1.03536	0.0406797	0.61624	NotSig	0.0362682	negligible	842.143	766.883	917.403	0.161349	1.61208	1.19627	0.106946	0.999837	Not Sig	nonsignificant	.	.	myelin basic protein [Source:RGD Symbol;Acc:3054]
Tspan5	chr2	200	118	104.817	89.4841	15.3326	1.17134	0.0406326	0.61624	NotSig	0.193956	negligible	25.9268	22.8369	29.0167	0.325606	1.13469	1.27061	0.256505	0.999837	Not Sig	nonsignificant	.	Y	tetraspanin 5 [Source:RGD Symbol;Acc:1303176]
Osbpl2	chr3	62	51	73.0545	102.103	-29.0488	0.715496	0.0399631	0.61624	NotSig	-0.362755	small	12.8753	14.7883	10.9622	0.469754	-0.661227	0.741275	0.508466	0.999837	Not Sig	nonsignificant	.	Y	oxysterol binding protein-like 2 [Source:RGD Symbol;Acc:1311312]
Atp6v1f	chr4	446	390	69.4074	76.9052	-7.49782	0.902506	0.0410766	0.61624	NotSig	-0.124698	negligible	108.024	112.099	103.949	0.163895	-0.737013	0.927294	0.461114	0.999837	Not Sig	nonsignificant	.	.
Mlf2	chr4	1000	717	85.5937	81.0504	4.54337	1.05606	0.0402918	0.61624	NotSig	0.114865	negligible	225.685	214.273	237.097	0.153863	0.928264	1.10652	0.353271	0.999837	Not Sig	nonsignificant	.	.	myeloid leukemia factor 2 [Source:RGD Symbol;Acc:1306294]
Extl1	chr5	42	26	88.8352	137.959	-49.124	0.643924	0.0402629	0.61624	NotSig	-0.59909	medium	7.33932	7.06171	7.61693	0.580388	0.422343	1.07863	0.672775	0.999837	Not Sig	nonsignificant	.	.	exostosin-like glycosyltransferase 1 [Source:RGD Symbol;Acc:1309572]
Kif1b	chr5	495	364	101.463	90.9811	10.4815	1.11521	0.040554	0.61624	NotSig	0.14035	negligible	40.5925	43.05	38.1349	0.265027	-0.725376	0.885828	0.468221	0.999837	Not Sig	nonsignificant	.	Y	kinesin family member 1B [Source:RGD Symbol;Acc:621520]
Fkbp1b	chr6	73	53	89.2508	112.388	-23.1368	0.794134	0.0407465	0.61624	NotSig	-0.403728	small	16.0989	16.3672	15.8306	0.37121	-0.128732	0.967216	0.89757	0.999837	Not Sig	nonsignificant	Y	.	FKBP prolyl isomerase 1B [Source:RGD Symbol;Acc:61835]
Thyn1	chr8	83	48	84.8079	106.368	-21.5604	0.797304	0.0411258	0.61624	NotSig	-0.380889	small	17.3665	16.1403	18.5928	0.395106	0.718782	1.15195	0.472276	0.999837	Not Sig	nonsignificant	.	.	thymocyte nuclear protein 1 [Source:RGD Symbol;Acc:1359525]
Hspd1	chr9	271	197	90.4238	77.75	12.6738	1.16301	0.0407116	0.61624	NotSig	0.131188	negligible	56.4079	57.0723	55.7434	0.209718	-0.172512	0.976715	0.863035	0.999837	Not Sig	nonsignificant	.	Y	heat shock protein family D (Hsp60) member 1 [Source:RGD Symbol;Acc:621314]
Tle4	chr1	74	69	103.696	81.5661	22.13	1.27131	0.0411245	0.61624	NotSig	0.305063	small	15.8061	15.1323	16.4799	0.435593	-0.0115263	1.08905	0.990804	0.999837	Not Sig	nonsignificant	Y	.	TLE family member 4, transcriptional corepressor [Source:RGD Symbol;Acc:3868]
Kdm5b	chr13	39	45	103.594	74.9796	28.6145	1.38163	0.040849	0.61624	NotSig	0.430371	small	6.84302	9.09848	4.58757	0.590254	-1.55848	0.504213	0.11912	0.999837	Not Sig	nonsignificant	.	Y	lysine demethylase 5B [Source:RGD Symbol;Acc:1565602]
Plcl1	chr9	48	33	102.857	74.3578	28.4993	1.38327	0.0410903	0.61624	NotSig	0.394138	small	9.86477	10.0678	9.6617	0.479247	-0.0518647	0.959661	0.958636	0.999837	Not Sig	nonsignificant	.	.	phospholipase C-like 1 [Source:RGD Symbol;Acc:708420]
Cdc42se2	chr10	250	190	93.2657	81.3012	11.9645	1.14716	0.0412919	0.616938	NotSig	0.200333	small	39.9513	38.2184	41.6841	0.251466	0.464744	1.09068	0.642115	0.999837	Not Sig	nonsignificant	.	Y	CDC42 small effector 2 [Source:RGD Symbol;Acc:1563924]
Tlk1	chr3	93	85	88.1863	111.754	-23.5674	0.789113	0.0417827	0.616938	NotSig	-0.203167	small	16.7635	16.0447	17.4822	0.432893	0.0190927	1.08959	0.984767	0.999837	Not Sig	nonsignificant	Y	.	tousled-like kinase 1 [Source:RGD Symbol;Acc:1310370]
Sel1l	chr6	150	103	91.4362	109.803	-18.3665	0.832732	0.0416233	0.616938	NotSig	-0.252612	small	12.2501	12.4923	12.008	0.435395	-0.170924	0.961231	0.864284	0.999837	Not Sig	nonsignificant	Y	Y	SEL1L adaptor subunit of ERAD E3 ubiquitin ligase [Source:RGD Symbol;Acc:620147]
Gga1	chr7	100	84	106.14	84.2923	21.8473	1.25919	0.0417902	0.616938	NotSig	0.230304	small	22.6449	22.49	22.7999	0.326174	0.108817	1.01378	0.913347	0.999837	Not Sig	nonsignificant	.	.	golgi associated, gamma adaptin ear containing, ARF binding protein 1 [Source:RGD Symbol;Acc:1307770]
Rnf25	chr9	41	37	108.166	64.7812	43.3845	1.66971	0.0417002	0.616938	NotSig	0.435125	small	9.50165	9.35575	9.64755	0.539751	-0.0429656	1.03119	0.965729	0.999837	Not Sig	nonsignificant	.	.	ring finger protein 25 [Source:RGD Symbol;Acc:1311557]
Ncoa2	chr5	42	53	76.1093	115.466	-39.3567	0.659149	0.0418847	0.61724	NotSig	-0.42797	small	7.50069	9.40168	5.59971	0.595761	-1.27668	0.595607	0.201716	0.999837	Not Sig	nonsignificant	Y	Y	nuclear receptor coactivator 2 [Source:RGD Symbol;Acc:620108]
Arpc5	chr13	496	323	105.695	96.0636	9.63139	1.10026	0.0420833	0.617556	NotSig	0.139891	negligible	92.5513	83.4203	101.682	0.191995	1.41157	1.21892	0.158076	0.999837	Not Sig	nonsignificant	.	Y	actin related protein 2/3 complex, subunit 5 [Source:RGD Symbol;Acc:1311791]
Rpl27-l1	chrX	25	20	75.194	51.3183	23.8757	1.46525	0.0420217	0.617556	NotSig	0.526018	medium	23.1453	20.0682	26.2224	0.33403	1.08618	1.30667	0.2774	0.999837	Not Sig	nonsignificant	.	.	ribosomal protein L27-like 1 [Source:RGD Symbol;Acc:1585224]
Serp1	chr2	237	125	113.218	97.1543	16.0639	1.16534	0.0421607	0.617771	NotSig	0.201377	small	38.1738	30.6226	45.7249	0.268631	2.13207	1.49317	0.0330012	0.999837	Not Sig	nonsignificant	Y	Y	stress-associated endoplasmic reticulum protein 1 [Source:RGD Symbol;Acc:620790]
Tmem219	chr1	30	28	85.8741	114.094	-28.2197	0.752663	0.0422491	0.618145	NotSig	-0.6231	medium	6.59114	6.77118	6.4111	0.625607	-0.437754	0.946821	0.661565	0.999837	Not Sig	nonsignificant	.	.	transmembrane protein 219 [Source:RGD Symbol;Acc:1560566]
Rabgap1	chr3	82	65	84.1364	110.362	-26.2258	0.762366	0.0423349	0.61848	NotSig	-0.343315	small	14.8385	14.4466	15.2305	0.409537	0.32737	1.05426	0.743388	0.999837	Not Sig	nonsignificant	.	.	RAB GTPase activating protein 1 [Source:RGD Symbol;Acc:1304691]
Arhgef1	chr1	32	17	164.048	99.1949	64.8536	1.6538	0.0426615	0.618656	NotSig	0.619224	medium	6.61488	5.53421	7.69555	0.582036	0.766072	1.39054	0.443633	0.999837	Not Sig	nonsignificant	.	.	Rho guanine nucleotide exchange factor 1 [Source:RGD Symbol;Acc:620951]
Ywhae	chr10	1887	1413	83.4063	88.8962	-5.48996	0.938243	0.0425114	0.618656	NotSig	-0.0879969	negligible	386.558	376.486	396.629	0.122409	0.517067	1.0535	0.605109	0.999837	Not Sig	nonsignificant	.	.	tyrosine 3-monooxygenase/tryptophan 5-monooxygenase activation protein, epsilon [Source:RGD Symbol;Acc:62000]
Pcp4	chr11	701	451	95.8127	104.575	-8.76213	0.916212	0.0428785	0.618656	NotSig	-0.140404	negligible	147.276	134.086	160.466	0.177705	1.45428	1.19674	0.145869	0.999837	Not Sig	nonsignificant	.	.	Purkinje cell protein 4 [Source:RGD Symbol;Acc:3271]
Tsen15	chr13	25	23	81.2052	118.479	-37.2735	0.685399	0.0431152	0.618656	NotSig	-0.621994	medium	7.19876	8.55423	5.84329	0.606004	-1.08141	0.683088	0.279513	0.999837	Not Sig	nonsignificant	.	.	tRNA splicing endonuclease subunit 15 [Source:RGD Symbol;Acc:1308584]
Egln1	chr19	110	106	69.8686	83.2038	-13.3352	0.839728	0.0424901	0.618656	NotSig	-0.317556	small	18.5133	19.4269	17.5997	0.356041	-0.588013	0.905944	0.556524	0.999837	Not Sig	nonsignificant	.	Y	egl-9 family hypoxia-inducible factor 1 [Source:RGD Symbol;Acc:631375]
Ndufa8	chr3	552	450	76.164	81.8896	-5.72564	0.930081	0.0432688	0.618656	NotSig	-0.1304	negligible	134.936	142.357	127.515	0.155108	-0.915386	0.895737	0.359989	0.999837	Not Sig	nonsignificant	.	.	NADH:ubiquinone oxidoreductase subunit A8 [Source:RGD Symbol;Acc:1306283]
Mpped2	chr3	84	85	89.3741	68.4647	20.9094	1.3054	0.0430285	0.618656	NotSig	0.259763	small	19.8463	22.8605	16.8321	0.355451	-1.44883	0.736295	0.147385	0.999837	Not Sig	nonsignificant	.	Y	metallophosphoesterase domain containing 2 [Source:RGD Symbol;Acc:735060]
Bloc1s1	chr7	198	144	71.007	80.168	-9.16104	0.885727	0.0428107	0.618656	NotSig	-0.2177	small	45.4495	43.4422	47.4568	0.254797	0.495166	1.09241	0.620483	0.999837	Not Sig	nonsignificant	.	.	biogenesis of lysosomal organelles complex-1, subunit 1 [Source:RGD Symbol;Acc:1307564]
Polr2e	chr7	154	118	86.9934	104.754	-17.7603	0.830457	0.0430234	0.618656	NotSig	-0.243335	small	37.0584	37.4807	36.6361	0.283075	-0.00611367	0.977465	0.995122	0.999837	Not Sig	nonsignificant	.	.	RNA polymerase II, I and III subunit E [Source:RGD Symbol;Acc:1589817]
Eps8	chr4	66	38	69.1822	93.7221	-24.5399	0.738163	0.0428371	0.618656	NotSig	-0.454775	small	9.70466	7.92742	11.4819	0.491789	1.08299	1.44838	0.278813	0.999837	Not Sig	nonsignificant	.	.	epidermal growth factor receptor pathway substrate 8 [Source:RGD Symbol;Acc:1310590]
Hapln2	chr2	37	39	163.99	109.902	54.0881	1.49215	0.0432311	0.618656	NotSig	0.395156	small	8.11322	8.93661	7.28983	0.530478	-0.511747	0.815726	0.608828	0.999837	Not Sig	nonsignificant	.	Y	hyaluronan and proteoglycan link protein 2 [Source:RGD Symbol;Acc:621854]
Lrrc4b	chr1	378	344	66.2889	74.4711	-8.18225	0.890128	0.044501	0.618837	NotSig	-0.191819	negligible	42.6161	42.4703	42.7619	0.322553	0.071794	1.00687	0.942766	0.999837	Not Sig	nonsignificant	.	.	leucine rich repeat containing 4B [Source:RGD Symbol;Acc:1307121]
Pak1	chr1	158	122	89.2247	106.761	-17.5361	0.835744	0.0452043	0.618837	NotSig	-0.270278	small	31.8617	34.6989	29.0245	0.299032	-0.760302	0.836466	0.447074	0.999837	Not Sig	nonsignificant	.	.	p21 (RAC1) activated kinase 1 [Source:RGD Symbol;Acc:3250]
Taldo1	chr1	270	196	70.5038	80.5274	-10.0236	0.875526	0.044685	0.618837	NotSig	-0.233301	small	64.9405	64.0249	65.8561	0.209212	0.321084	1.0286	0.748147	0.999837	Not Sig	nonsignificant	.	.	transaldolase 1 [Source:RGD Symbol;Acc:620674]
Ndufv1	chr1	342	254	81.8261	90.4182	-8.59205	0.904974	0.0434689	0.618837	NotSig	-0.171906	negligible	76.5295	73.2197	79.8394	0.202634	0.413808	1.09041	0.679015	0.999837	Not Sig	nonsignificant	.	.	NADH:ubiquinone oxidoreductase core subunit V1 [Source:RGD Symbol;Acc:1359247]
Shisa9	chr10	101	81	81.5385	99.4917	-17.9531	0.819551	0.0447081	0.618837	NotSig	-0.351992	small	17.2927	16.0842	18.5013	0.375768	0.332155	1.15028	0.739772	0.999837	Not Sig	nonsignificant	Y	.	shisa family member 9 [Source:RGD Symbol;Acc:2320726]
Igsf11	chr11	42	48	78.8164	53.5022	25.3142	1.47314	0.0452971	0.618837	NotSig	0.453898	small	7.47332	8.20534	6.74129	0.650577	-0.437236	0.821573	0.661941	0.999837	Not Sig	nonsignificant	Y	Y	immunoglobulin superfamily, member 11 [Source:RGD Symbol;Acc:1308758]
Ube2v2	chr11	220	187	66.3176	78.4132	-12.0956	0.845745	0.0457582	0.618837	NotSig	-0.184499	negligible	50.6813	55.4827	45.8799	0.231076	-1.14161	0.826922	0.253615	0.999837	Not Sig	nonsignificant	.	Y	ubiquitin conjugating enzyme E2 V2 [Source:RGD Symbol;Acc:727838]
Pnpla6	chr12	44	41	63.097	92.8377	-29.7407	0.679649	0.0435298	0.618837	NotSig	-0.478609	small	10.6382	12.1166	9.15979	0.510758	-0.761172	0.755968	0.446554	0.999837	Not Sig	nonsignificant	.	.	patatin-like phospholipase domain containing 6 [Source:RGD Symbol;Acc:1564611]
Arpc1a	chr12	480	349	92.3617	102.764	-10.4027	0.898771	0.0439753	0.618837	NotSig	-0.154644	negligible	114.374	110.77	117.978	0.173203	0.451518	1.06507	0.651616	0.999837	Not Sig	nonsignificant	.	.	actin related protein 2/3 complex, subunit 1A [Source:RGD Symbol;Acc:620834]
Bcl7b	chr12	61	45	76.9634	97.87	-20.9066	0.786384	0.0454151	0.618837	NotSig	-0.432382	small	14.4542	15.1077	13.8007	0.412476	-0.126115	0.913486	0.899641	0.999837	Not Sig	nonsignificant	.	.	BAF chromatin remodeling complex subunit BCL7B [Source:RGD Symbol;Acc:1597090]
Ewsr1	chr14	182	102	118.334	95.2897	23.044	1.24183	0.0452509	0.618837	NotSig	0.239873	small	40.0701	32.8037	47.3364	0.262247	1.83233	1.44302	0.0669026	0.999837	Not Sig	nonsignificant	.	.	EWS RNA-binding protein 1 [Source:RGD Symbol;Acc:1307258]
Sncb	chr17	1144	918	87.7491	93.1848	-5.43564	0.941668	0.0438417	0.618837	NotSig	-0.121802	negligible	258.532	259.348	257.715	0.124138	-0.031455	0.993702	0.974907	0.999837	Not Sig	nonsignificant	.	.	synuclein, beta [Source:RGD Symbol;Acc:70992]
Bola1	chr2	61	42	60.1191	83.1818	-23.0627	0.722744	0.0440577	0.618837	NotSig	-0.518104	medium	11.9102	10.0481	13.7722	0.46744	0.606372	1.37063	0.544268	0.999837	Not Sig	nonsignificant	.	.	bolA family member 1 [Source:RGD Symbol;Acc:1310586]
S1pr1	chr2	169	158	80.2146	65.6624	14.5522	1.22162	0.0451307	0.618837	NotSig	0.191665	negligible	28.0636	30.1978	25.9294	0.31522	-0.696004	0.858651	0.486426	0.999837	Not Sig	nonsignificant	.	.	sphingosine-1-phosphate receptor 1 [Source:RGD Symbol;Acc:61958]
Commd9	chr3	85	78	81.9999	97.414	-15.4141	0.841767	0.0447841	0.618837	NotSig	-0.270351	small	20.8575	22.7357	18.9793	0.330585	-0.867698	0.834779	0.38556	0.999837	Not Sig	nonsignificant	.	.	COMM domain containing 9 [Source:RGD Symbol;Acc:1307706]
Aar2	chr3	50	45	95.3264	118.81	-23.4838	0.802342	0.045347	0.618837	NotSig	-0.41986	small	7.86418	8.32289	7.40546	0.539202	-0.173035	0.889771	0.862624	0.999837	Not Sig	nonsignificant	.	.	AAR2 splicing factor [Source:RGD Symbol;Acc:1311066]
Ralgapb	chr3	105	76	84.5774	102.555	-17.9779	0.8247	0.0443486	0.618837	NotSig	-0.364084	small	10.0106	8.27101	11.7502	0.508185	0.961112	1.42065	0.336496	0.999837	Not Sig	nonsignificant	.	.	Ral GTPase activating protein non-catalytic subunit beta [Source:RGD Symbol;Acc:1306861]
RGD1564804	chr5	30	27	70.3397	103.082	-32.7421	0.682368	0.0448443	0.618837	NotSig	-0.598267	medium	6.19926	6.54937	5.84915	0.611696	-0.16079	0.893087	0.872259	0.999837	Not Sig	nonsignificant	.	.	similar to chromosome 1 open reading frame 50 [Source:RGD Symbol;Acc:1564804]
Dync1h1	chr6	337	242	108.994	119.045	-10.0511	0.915569	0.0457023	0.618837	NotSig	-0.174931	negligible	81.9275	82.1961	81.6589	0.254596	0.0653466	0.993464	0.947898	0.999837	Not Sig	nonsignificant	.	.	dynein cytoplasmic 1 heavy chain 1 [Source:RGD Symbol;Acc:2511]
Oaz1	chr7	1093	765	90.9837	86.7221	4.26159	1.04914	0.0452316	0.618837	NotSig	0.10315	negligible	249.061	235.631	262.49	0.131461	1.11	1.11399	0.267001	0.999837	Not Sig	nonsignificant	.	.	ornithine decarboxylase antizyme 1 [Source:RGD Symbol;Acc:3219]
Tpgs1	chr7	146	119	90.0914	78.6837	11.4078	1.14498	0.0440583	0.618837	NotSig	0.239106	small	31.1411	31.8102	30.472	0.277725	-0.326216	0.95793	0.744261	0.999837	Not Sig	nonsignificant	.	.	tubulin polyglutamylase complex subunit 1 [Source:RGD Symbol;Acc:1588613]
Tmem106c	chr7	53	25	91.3669	114.422	-23.0556	0.798505	0.0441094	0.618837	NotSig	-0.447769	small	9.62394	6.8854	12.3625	0.519705	1.48462	1.79546	0.137645	0.999837	Not Sig	nonsignificant	.	.	transmembrane protein 106C [Source:RGD Symbol;Acc:1311532]
Rnf214	chr8	30	21	70.5789	113.337	-42.758	0.622736	0.0444455	0.618837	NotSig	-0.434835	small	7.11576	8.65603	5.57549	0.596527	-0.844883	0.644116	0.398176	0.999837	Not Sig	nonsignificant	.	.	ring finger protein 214 [Source:RGD Symbol;Acc:1307500]
Hspe1	chr9	378	324	71.7881	80.2709	-8.48283	0.894323	0.0452201	0.618837	NotSig	-0.135898	negligible	91.5422	92.5908	90.4937	0.176792	-0.0505182	0.977351	0.959709	0.999837	Not Sig	nonsignificant	.	.	heat shock protein family E (Hsp10) member 1 [Source:RGD Symbol;Acc:2844]
Ppp1r7	chr9	89	92	75.9953	93.689	-17.6937	0.811144	0.0457346	0.618837	NotSig	-0.254522	small	16.7761	18.6687	14.8835	0.382905	-0.973864	0.797243	0.330124	0.999837	Not Sig	nonsignificant	.	.
Id4	chr17	71	77	97.2234	70.3154	26.908	1.38268	0.0438843	0.618837	NotSig	0.304215	small	13.0154	14.2363	11.7944	0.436121	-0.656963	0.828476	0.511205	0.999837	Not Sig	nonsignificant	.	Y	inhibitor of DNA binding 4 [Source:RGD Symbol;Acc:631428]
Pigu	chr3	27	28	56.0049	88.3593	-32.3545	0.633831	0.0450921	0.618837	NotSig	-0.588724	medium	7.42521	8.3422	6.50822	0.599277	-0.601813	0.780156	0.547299	0.999837	Not Sig	nonsignificant	.	.	phosphatidylinositol glycan anchor biosynthesis, class U [Source:RGD Symbol;Acc:727825]
Uxt	chrX	25	26	98.8751	63.57	35.3051	1.55537	0.0447239	0.618837	NotSig	0.475977	small	6.70369	7.42712	5.98026	0.567248	-0.478611	0.805193	0.632215	0.999837	Not Sig	nonsignificant	.	.	ubiquitously-expressed, prefoldin-like chaperone [Source:RGD Symbol;Acc:1359326]
Dgkb	chr6	160	116	90.0074	109.151	-19.1434	0.824615	0.0458395	0.619085	NotSig	-0.225263	small	20.4278	21.3918	19.4637	0.356192	-0.383966	0.909868	0.701004	0.999837	Not Sig	nonsignificant	Y	Y	diacylglycerol kinase, beta [Source:RGD Symbol;Acc:2488]
Derl1	chr7	138	123	80.5438	96.1227	-15.5788	0.837928	0.0460344	0.620864	NotSig	-0.265317	small	25.1759	25.9809	24.3708	0.335507	-0.574043	0.938029	0.565938	0.999837	Not Sig	nonsignificant	.	Y	derlin 1 [Source:RGD Symbol;Acc:1311835]
Elof1	chr8	73	75	83.5985	102.636	-19.037	0.814518	0.0461002	0.620901	NotSig	-0.310001	small	19.6544	23.0069	16.3019	0.360279	-1.37881	0.708565	0.167953	0.999837	Not Sig	nonsignificant	.	.	elongation factor 1 [Source:RGD Symbol;Acc:1587399]
Dlg1	chr11	39	51	70.0678	104.808	-34.7401	0.668535	0.0464902	0.62359	NotSig	-0.404733	small	9.26671	11.6026	6.93082	0.521936	-1.56035	0.597351	0.118678	0.999837	Not Sig	nonsignificant	Y	.	discs large MAGUK scaffold protein 1 [Source:RGD Symbol;Acc:2505]
Napa	chr1	829	541	92.7569	98.858	-6.10114	0.938284	0.0472652	0.627562	NotSig	-0.0906834	negligible	173.127	160.824	185.43	0.171479	1.15868	1.153	0.246589	0.999837	Not Sig	nonsignificant	.	.	NSF attachment protein alpha [Source:RGD Symbol;Acc:620855]
Akt2	chr1	83	61	69.5677	94.9333	-25.3656	0.732806	0.047799	0.627562	NotSig	-0.282537	small	14.6976	14.3383	15.0569	0.396681	0.110903	1.05012	0.911693	0.999837	Not Sig	nonsignificant	.	.	AKT serine/threonine kinase 2 [Source:RGD Symbol;Acc:2082]
LOC108352650	chr13	559	464	58.6972	63.3914	-4.69411	0.92595	0.0481267	0.627562	NotSig	-0.116171	negligible	146.747	146.367	147.127	0.159314	0.0315661	1.0052	0.974818	0.999837	Not Sig	nonsignificant	.	.
Tsc22d1	chr15	939	597	95.3665	89.4043	5.96228	1.06669	0.0472336	0.627562	NotSig	0.105163	negligible	172.878	145.464	200.292	0.156156	2.79012	1.37692	0.00526888	0.318985	Not Sig	nonsignificant	.	Y	TSC22 domain family, member 1 [Source:RGD Symbol;Acc:3850]
Commd6	chr15	58	52	69.8123	96.5582	-26.746	0.723007	0.0474985	0.627562	NotSig	-0.366129	small	13.4815	14.0338	12.9292	0.418002	-0.291069	0.92129	0.770999	0.999837	Not Sig	nonsignificant	.	.	COMM domain containing 6 [Source:RGD Symbol;Acc:1560745]
Smim13	chr17	183	137	77.307	91.4121	-14.105	0.845698	0.047625	0.627562	NotSig	-0.226792	small	18.4675	16.8123	20.1227	0.379167	0.556255	1.19691	0.578037	0.999837	Not Sig	nonsignificant	Y	Y
H2az1	chr2	471	333	94.3729	87.3007	7.07217	1.08101	0.0481174	0.627562	NotSig	0.135342	negligible	93.6375	89.001	98.2739	0.178601	0.804554	1.10419	0.421077	0.999837	Not Sig	nonsignificant	Y	Y	H2A.Z variant histone 1 [Source:RGD Symbol;Acc:621464]
Amd1	chr20	304	152	116.515	101.153	15.3621	1.15187	0.047706	0.627562	NotSig	0.205207	small	38.7281	32.6282	44.8281	0.268411	1.49806	1.37391	0.134117	0.999837	Not Sig	nonsignificant	.	.	adenosylmethionine decarboxylase 1 [Source:RGD Symbol;Acc:2104]
Dctn1	chr4	464	395	84.4599	93.2457	-8.78573	0.905779	0.047978	0.627562	NotSig	-0.0987636	negligible	119.862	124.246	115.478	0.174955	-0.563204	0.929436	0.573296	0.999837	Not Sig	nonsignificant	.	.
Tprg1l	chr5	322	248	91.8591	101.513	-9.654	0.904899	0.0478221	0.627562	NotSig	-0.1346	negligible	67.2479	68.2828	66.213	0.207844	-0.287972	0.969689	0.773368	0.999837	Not Sig	nonsignificant	.	.	tumor protein p63 regulated 1-like [Source:RGD Symbol;Acc:1590079]
Clpp	chr9	97	82	73.1939	92.9733	-19.7794	0.787257	0.0471756	0.627562	NotSig	-0.356867	small	23.3049	24.6746	21.9353	0.319682	-0.539912	0.888985	0.589258	0.999837	Not Sig	nonsignificant	.	.	caseinolytic mitochondrial matrix peptidase proteolytic subunit [Source:RGD Symbol;Acc:1588583]
Syap1	chrX	39	38	89.8568	112.591	-22.7342	0.798082	0.0474919	0.627562	NotSig	-0.482923	small	9.97889	9.48007	10.4777	0.517751	0.177172	1.10524	0.859373	0.999837	Not Sig	nonsignificant	.	Y	synapse associated protein 1 [Source:RGD Symbol;Acc:1303113]
Rbfox2	chr7	158	126	97.6183	108.922	-11.3038	0.896221	0.0479395	0.627562	NotSig	-0.276869	small	9.44372	8.9521	9.93535	0.501503	0.477912	1.10983	0.632713	0.999837	Not Sig	nonsignificant	Y	Y	RNA binding fox-1 homolog 2 [Source:RGD Symbol;Acc:1311838]
Acad8	chr8	45	37	101.175	149.239	-48.0641	0.677939	0.0487281	0.629823	NotSig	-0.454562	small	9.47373	9.13924	9.80821	0.494752	0.149811	1.0732	0.880914	0.999837	Not Sig	nonsignificant	.	Y	acyl-CoA dehydrogenase family, member 8 [Source:RGD Symbol;Acc:1564209]
Samd1	chr19	47	50	96.4485	70.9478	25.5007	1.35943	0.0487485	0.629823	NotSig	0.437882	small	11.943	12.0595	11.8266	0.441403	-0.217225	0.980688	0.828033	0.999837	Not Sig	nonsignificant	.	.	sterile alpha motif domain containing 1 [Source:RGD Symbol;Acc:7529921]
Pon2	chr4	110	71	114.893	98.8869	16.0062	1.16186	0.0488273	0.630014	NotSig	0.301017	small	24.5492	21.519	27.5794	0.31681	1.03192	1.28163	0.30211	0.999837	Not Sig	nonsignificant	.	Y	paraoxonase 2 [Source:RGD Symbol;Acc:1309954]
Opa1	chr11	165	143	105.829	88.6911	17.1374	1.19323	0.0489874	0.6306	NotSig	0.172227	negligible	26.9631	26.9943	26.9319	0.311706	-0.242187	0.997687	0.808636	0.999837	Not Sig	nonsignificant	.	Y	OPA1, mitochondrial dynamin like GTPase [Source:RGD Symbol;Acc:708423]
Scnm1	chr2	38	35	76.5455	113.401	-36.8554	0.674999	0.0493305	0.633182	NotSig	-0.431668	small	9.20463	9.98908	8.42017	0.498246	-0.493986	0.842938	0.621316	0.999837	Not Sig	nonsignificant	.	.	sodium channel modifier 1 [Source:RGD Symbol;Acc:1308968]
Tada3	chr4	58	53	87.5823	117.047	-29.4648	0.748265	0.0496331	0.634581	NotSig	-0.378336	small	14.6746	16.1162	13.2331	0.392143	-0.709153	0.821102	0.478229	0.999837	Not Sig	nonsignificant	.	Y	transcriptional adaptor 3 [Source:RGD Symbol;Acc:1564009]
Id3	chr5	52	55	52.9829	71.0091	-18.0262	0.746142	0.0499449	0.637738	NotSig	-0.45786	small	16.0681	18.1837	13.9524	0.401232	-0.727462	0.767304	0.466943	0.999837	Not Sig	nonsignificant	.	Y	inhibitor of DNA binding 3 [Source:RGD Symbol;Acc:2860]
Mzt2b	chr11	69	68	74.9588	94.6879	-19.7292	0.79164	0.0501258	0.638712	NotSig	-0.326348	small	15.3487	18.101	12.5964	0.399769	-1.20003	0.695897	0.230127	0.999837	Not Sig	nonsignificant	.	.	mitotic spindle organizing protein 2B [Source:RGD Symbol;Acc:1308126]
Atp6v1g1	chr5	464	372	69.4083	76.3327	-6.92439	0.909287	0.0501678	0.638712	NotSig	-0.141525	negligible	71.056	70.5235	71.5884	0.189638	0.0871809	1.0151	0.930528	0.999837	Not Sig	nonsignificant	.	Y	ATPase H+ transporting V1 subunit G1 [Source:RGD Symbol;Acc:1310088]
Evl	chr6	164	146	87.1534	77.2967	9.85669	1.12752	0.050281	0.638712	NotSig	0.21	small	39.5652	43.5786	35.5518	0.250046	-1.27032	0.815809	0.203971	0.999837	Not Sig	nonsignificant	.	Y	Enah/Vasp-like [Source:RGD Symbol;Acc:621150]
LOC108351885	chr9	69	58	95.0061	111.525	-16.5184	0.851885	0.0502438	0.638712	NotSig	-0.431168	small	12.3938	14.384	10.4036	0.515573	-0.614865	0.723278	0.538644	0.999837	Not Sig	nonsignificant	.	.	uncharacterized LOC108351885 [Source:RGD Symbol;Acc:11396250]
Cdkl2	chr14	81	73	91.8584	114.189	-22.3306	0.804442	0.0504833	0.638805	NotSig	-0.308147	small	17.2078	15.6075	18.8082	0.374525	0.554675	1.20507	0.579117	0.999837	Not Sig	nonsignificant	.	.	cyclin dependent kinase like 2 [Source:RGD Symbol;Acc:1309625]
Sorbs2	chr16	66	64	115.606	83.6797	31.926	1.38153	0.0504707	0.638805	NotSig	0.220853	small	15.4594	16.5517	14.367	0.399963	-0.371105	0.868013	0.710559	0.999837	Not Sig	nonsignificant	.	Y	sorbin and SH3 domain containing 2 [Source:RGD Symbol;Acc:620061]
Wls	chr2	54	47	79.4145	105.839	-26.4245	0.750333	0.0506853	0.640537	NotSig	-0.311086	small	12.2085	13.0757	11.3413	0.4328	-0.635573	0.867359	0.525055	0.999837	Not Sig	nonsignificant	.	.	Wnt ligand secretion mediator [Source:RGD Symbol;Acc:735139]
Tbc1d15	chr7	34	34	104.797	62.653	42.1442	1.67266	0.0511252	0.645266	NotSig	0.36508	small	9.064	9.75878	8.36922	0.522343	-0.122815	0.857609	0.902254	0.999837	Not Sig	nonsignificant	Y	Y	TBC1 domain family, member 15 [Source:RGD Symbol;Acc:1307920]
Dscaml1	chr8	51	44	96.8448	67.9586	28.8862	1.42506	0.0514053	0.647971	NotSig	0.405761	small	12.5583	13.8214	11.2952	0.475174	-0.281358	0.817226	0.778436	0.999837	Not Sig	nonsignificant	.	Y	DS cell adhesion molecule-like 1 [Source:RGD Symbol;Acc:1304887]
Ubald1	chr10	352	193	100.485	91.213	9.27153	1.10165	0.0516394	0.64812	NotSig	0.218604	small	58.3965	45.1695	71.6235	0.223311	2.73513	1.58566	0.00623552	0.357811	Not Sig	nonsignificant	.	.	UBA-like domain containing 1 [Source:RGD Symbol;Acc:1359443]
Rnasek	chr10	1039	768	87.8392	93.8731	-6.03398	0.935722	0.0516808	0.64812	NotSig	-0.0825081	negligible	245.982	243.688	248.275	0.144013	0.216593	1.01882	0.828525	0.999837	Not Sig	nonsignificant	.	.
Hectd4	chr12	173	146	88.2484	108.072	-19.8239	0.816568	0.0518082	0.64889	NotSig	-0.238771	small	26.7942	28.0831	25.5053	0.306678	-0.636472	0.908211	0.524469	0.999837	Not Sig	nonsignificant	.	.	HECT domain E3 ubiquitin protein ligase 4 [Source:RGD Symbol;Acc:1309762]
Cep20	chr10	51	54	72.1424	96.0053	-23.863	0.751441	0.0520406	0.650014	NotSig	-0.362642	small	11.8171	12.3815	11.2527	0.455586	-0.595261	0.908829	0.551669	0.999837	Not Sig	nonsignificant	.	Y	centrosomal protein 20 [Source:RGD Symbol;Acc:1305823]
Spout1	chr3	30	27	69.7938	94.1283	-24.3344	0.741476	0.0520705	0.650014	NotSig	-0.489907	small	7.9647	9.8333	6.0961	0.528051	-1.25783	0.619944	0.208454	0.999837	Not Sig	nonsignificant	.	.	SPOUT domain containing methyltransferase 1 [Source:RGD Symbol;Acc:1563514]
Asb8	chr7	107	84	72.0348	92.2352	-20.2005	0.78099	0.0522696	0.65135	NotSig	-0.27016	small	18.8173	18.9535	18.6812	0.351032	-0.161269	0.985634	0.871881	0.999837	Not Sig	nonsignificant	.	Y	ankyrin repeat and SOCS box-containing 8 [Source:RGD Symbol;Acc:1309246]
Rpl10a	chr20	591	469	76.8855	83.773	-6.88747	0.917784	0.0523838	0.651947	NotSig	-0.0912676	negligible	95.0355	103.045	87.0259	0.19583	-1.24695	0.844541	0.212417	0.999837	Not Sig	nonsignificant	.	.	ribosomal protein L10A [Source:RGD Symbol;Acc:620497]
Dnajc4	chr1	29	26	86.6441	63.7947	22.8495	1.35817	0.0535398	0.654269	NotSig	0.565494	medium	7.26585	7.32654	7.20515	0.586352	0.0942661	0.983431	0.924898	0.999837	Not Sig	nonsignificant	.	.	DnaJ heat shock protein family (Hsp40) member C4 [Source:RGD Symbol;Acc:1308693]
Vldlr	chr1	65	41	110.673	76.8316	33.8416	1.44047	0.0536065	0.654269	NotSig	0.412742	small	10.8619	12.614	9.10973	0.483037	-0.731761	0.722189	0.464314	0.999837	Not Sig	nonsignificant	Y	Y	very low density lipoprotein receptor [Source:RGD Symbol;Acc:3963]
Hip1r	chr12	56	31	93.7174	65.7371	27.9803	1.42564	0.0533247	0.654269	NotSig	0.377143	small	7.54337	5.69011	9.39663	0.582194	1.31361	1.6514	0.188977	0.999837	Not Sig	nonsignificant	.	.	huntingtin interacting protein 1 related [Source:RGD Symbol;Acc:621615]
Usp38	chr19	74	20	128.069	63.1052	64.9636	2.02945	0.0534893	0.654269	NotSig	0.52427	medium	12.0164	4.44891	19.5839	0.638435	3.22922	4.40195	0.00124127	0.0975133	Not Sig	nonsignificant	Y	Y	ubiquitin specific peptidase 38 [Source:RGD Symbol;Acc:1311974]
Galnt2	chr19	73	55	71.1217	98.7351	-27.6134	0.720328	0.0526821	0.654269	NotSig	-0.449417	small	8.55347	8.60851	8.49843	0.552984	-0.0413725	0.987213	0.966999	0.999837	Not Sig	nonsignificant	Y	Y	polypeptide N-acetylgalactosaminyltransferase 2 [Source:RGD Symbol;Acc:1310692]
Rab33b	chr2	49	63	61.8746	85.3623	-23.4876	0.724848	0.0536352	0.654269	NotSig	-0.401311	small	9.60501	10.9733	8.23676	0.483386	-0.953855	0.750621	0.340157	0.999837	Not Sig	nonsignificant	Y	Y	RAB33B, member RAS oncogene family [Source:RGD Symbol;Acc:1308353]
Rps27	chr2	909	700	61.1325	66.5101	-5.37754	0.919147	0.0528178	0.654269	NotSig	-0.113794	negligible	157.913	165.11	150.716	0.156943	-0.872224	0.912823	0.383086	0.999837	Not Sig	nonsignificant	.	.	ribosomal protein S27 [Source:RGD Symbol;Acc:621045]
Rnf181	chr4	127	83	100.074	82.5649	17.5093	1.21207	0.053142	0.654269	NotSig	0.279173	small	22.1373	21.8209	22.4537	0.343679	0.245232	1.029	0.806277	0.999837	Not Sig	nonsignificant	.	.	ring finger protein 181 [Source:RGD Symbol;Acc:1359698]
Slc4a1ap	chr6	53	31	98.3522	75.9878	22.3643	1.29431	0.0532457	0.654269	NotSig	0.468891	small	12.248	11.4026	13.0935	0.465065	0.486822	1.14829	0.626384	0.999837	Not Sig	nonsignificant	.	.	solute carrier family 4 member 1 adaptor protein [Source:RGD Symbol;Acc:1307080]
Cap1	chr5	547	369	90.8717	101.565	-10.6929	0.894719	0.0537859	0.655294	NotSig	-0.117014	negligible	109.165	98.8783	119.451	0.170915	1.52796	1.20806	0.126523	0.999837	Not Sig	nonsignificant	.	.	cyclase associated actin cytoskeleton regulatory protein 1 [Source:RGD Symbol;Acc:620309]
Larp7	chr2	37	31	96.63	65.406	31.224	1.47739	0.0539038	0.655918	NotSig	0.437526	small	8.62696	7.69277	9.56114	0.55972	0.409738	1.24287	0.681998	0.999837	Not Sig	nonsignificant	.	Y	La ribonucleoprotein 7, transcriptional regulator [Source:RGD Symbol;Acc:1592474]
Apbb1	chr1	566	408	83.3686	90.236	-6.86743	0.923895	0.0540323	0.656594	NotSig	-0.134909	negligible	128.948	123.774	134.122	0.162754	0.688939	1.0836	0.490862	0.999837	Not Sig	nonsignificant	.	.	amyloid beta precursor protein binding family B member 1 [Source:RGD Symbol;Acc:2122]
Padi2	chr5	55	41	85.9064	63.1905	22.7159	1.35948	0.0540929	0.656594	NotSig	0.371893	small	6.82013	7.43149	6.20877	0.597091	-0.537392	0.835467	0.590997	0.999837	Not Sig	nonsignificant	.	Y	peptidyl arginine deiminase 2 [Source:RGD Symbol;Acc:3288]
Anapc15	chr1	31	17	82.7608	113.521	-30.7603	0.729035	0.0550126	0.658531	NotSig	-0.714237	medium	6.05089	5.78171	6.32007	0.662566	0.274903	1.09311	0.783391	0.999837	Not Sig	nonsignificant	.	.	anaphase promoting complex subunit 15 [Source:RGD Symbol;Acc:1311634]
Sox2	chr2	69	60	90.367	65.0329	25.3341	1.38956	0.0546068	0.658531	NotSig	0.321209	small	14.5774	15.415	13.7397	0.448446	-0.267482	0.891319	0.789098	0.999837	Not Sig	nonsignificant	.	Y	SRY-box transcription factor 2 [Source:RGD Symbol;Acc:1565646]
Cdc42se1	chr2	89	58	89.66	69.8285	19.8315	1.284	0.0553241	0.658531	NotSig	0.291927	small	9.60022	9.0769	10.1235	0.480035	0.176041	1.11531	0.860261	0.999837	Not Sig	nonsignificant	.	Y	CDC42 small effector 1 [Source:RGD Symbol;Acc:1561700]
Grin1	chr3	552	370	117.711	108.161	9.55077	1.0883	0.0551716	0.658531	NotSig	0.120696	negligible	102.786	97.7881	107.785	0.216592	0.759036	1.10223	0.447831	0.999837	Not Sig	nonsignificant	.	.	glutamate ionotropic receptor NMDA type subunit 1 [Source:RGD Symbol;Acc:2736]
Tmx2	chr3	239	178	83.5958	93.288	-9.69216	0.896105	0.0548768	0.658531	NotSig	-0.176967	negligible	35.6181	36.5785	34.6577	0.309723	-0.152984	0.947487	0.878411	0.999837	Not Sig	nonsignificant	.	.	thioredoxin-related transmembrane protein 2 [Source:RGD Symbol;Acc:1359456]
Fam131b	chr4	187	144	88.8131	104.451	-15.6376	0.850287	0.0547376	0.658531	NotSig	-0.258147	small	16.4042	15.5492	17.2592	0.374654	0.455641	1.10997	0.648648	0.999837	Not Sig	nonsignificant	.	Y	family with sequence similarity 131, member B [Source:RGD Symbol;Acc:1560653]
RGD1564053	chr5	91	72	86.6276	115.607	-28.9793	0.749329	0.0550767	0.658531	NotSig	-0.319817	small	5.95468	5.74372	6.16563	0.616022	-0.0676228	1.07346	0.946086	0.999837	Not Sig	nonsignificant	Y	Y	RIKEN cDNA A830018L16 gene [Source:MGI Symbol;Acc:MGI:2444149]
Rnf139	chr7	45	31	93.5053	58.1434	35.3618	1.60818	0.0550378	0.658531	NotSig	0.425574	small	7.29846	7.21946	7.37747	0.548841	0.00318076	1.02189	0.997462	0.999837	Not Sig	nonsignificant	.	.
Cenpx	chr10	97	68	100.395	83.2351	17.1601	1.20616	0.0548274	0.658531	NotSig	0.292426	small	20.5482	19.1447	21.9516	0.329751	0.549862	1.14661	0.582414	0.999837	Not Sig	nonsignificant	.	.
Kcnj4	chr7	95	73	78.4882	67.3313	11.1569	1.1657	0.0554692	0.65946	NotSig	0.302757	small	11.9126	11.9625	11.8628	0.453363	-0.0627919	0.991668	0.949932	0.999837	Not Sig	nonsignificant	.	Y	potassium inwardly-rectifying channel, subfamily J, member 4 [Source:RGD Symbol;Acc:621436]
Iffo1	chr4	57	50	97.9568	126.471	-28.5144	0.774538	0.055641	0.659839	NotSig	-0.359863	small	15.009	15.524	14.494	0.401929	-0.116566	0.933652	0.907204	0.999837	Not Sig	nonsignificant	.	Y	intermediate filament family orphan 1 [Source:RGD Symbol;Acc:1308257]
Ncbp1	chr5	60	48	73.964	102.143	-28.1785	0.724125	0.0556579	0.659839	NotSig	-0.411898	small	13.3567	11.2261	15.4874	0.420148	0.790063	1.3796	0.429491	0.999837	Not Sig	nonsignificant	.	Y	nuclear cap binding protein subunit 1 [Source:RGD Symbol;Acc:1308973]
Mpzl1	chr13	56	42	66.4191	91.9494	-25.5302	0.722345	0.0557024	0.659839	NotSig	-0.421381	small	8.79239	7.67647	9.90831	0.515689	0.560542	1.29074	0.57511	0.999837	Not Sig	nonsignificant	.	.	myelin protein zero-like 1 [Source:RGD Symbol;Acc:1359140]
Tmem258	chr1	91	97	85.985	109.415	-23.43	0.785861	0.0560076	0.660272	NotSig	-0.287201	small	17.8531	20.488	15.2182	0.370691	-1.22201	0.742786	0.221702	0.999837	Not Sig	nonsignificant	.	Y
Brinp1	chr5	310	129	97.171	81.585	15.586	1.19104	0.0559509	0.660272	NotSig	0.178448	negligible	36.3268	26.3962	46.2574	0.371143	2.20596	1.75242	0.0273866	0.999837	Not Sig	nonsignificant	.	.	BMP/retinoic acid inducible neural specific 1 [Source:RGD Symbol;Acc:708519]
Psmc4	chr1	134	93	72.5571	87.0182	-14.4611	0.833815	0.0566292	0.666801	NotSig	-0.131268	negligible	30.2967	27.4106	33.1829	0.289571	0.745039	1.21059	0.456248	0.999837	Not Sig	nonsignificant	.	.	proteasome 26S subunit, ATPase 4 [Source:RGD Symbol;Acc:621102]
Smim7	chr16	133	98	94.3724	111.357	-16.9841	0.84748	0.0567118	0.666974	NotSig	-0.27586	small	27.9372	25.0072	30.8673	0.296124	0.956908	1.23434	0.338614	0.999837	Not Sig	nonsignificant	.	.	small integral membrane protein 7 [Source:RGD Symbol;Acc:1588793]
Smg7	chr13	78	68	131.326	102.16	29.166	1.28549	0.0573241	0.669009	NotSig	0.317553	small	10.9006	11.4656	10.3356	0.495969	-0.310354	0.901446	0.756292	0.999837	Not Sig	nonsignificant	.	Y	SMG7 nonsense mediated mRNA decay factor [Source:RGD Symbol;Acc:1310761]
Smpd3	chr19	105	82	115.768	97.9191	17.8489	1.18228	0.0573611	0.669009	NotSig	0.272636	small	13.0905	12.0298	14.1512	0.432718	0.644629	1.17635	0.519168	0.999837	Not Sig	nonsignificant	.	Y	sphingomyelin phosphodiesterase 3 [Source:RGD Symbol;Acc:619754]
Hibadh	chr4	93	76	101.23	78.2329	22.9973	1.29396	0.0573043	0.669009	NotSig	0.194771	negligible	21.7111	22.901	20.5212	0.332449	-0.425653	0.896082	0.67036	0.999837	Not Sig	nonsignificant	.	.	3-hydroxyisobutyrate dehydrogenase [Source:RGD Symbol;Acc:708399]
Tex264	chr8	130	136	75.0292	84.508	-9.47873	0.887836	0.0572501	0.669009	NotSig	-0.243061	small	34.6824	37.8343	31.5306	0.263762	-1.18848	0.833386	0.234643	0.999837	Not Sig	nonsignificant	.	.	testis expressed 264 [Source:RGD Symbol;Acc:1359353]
Fam169a	chr2	44	32	114.52	78.9441	35.5756	1.45064	0.057553	0.670452	NotSig	0.384038	small	6.8214	7.95693	5.68586	0.598697	-0.707281	0.71458	0.479392	0.999837	Not Sig	nonsignificant	Y	.	family with sequence similarity 169, member A [Source:RGD Symbol;Acc:1590893]
Idh2	chr1	77	66	85.9068	106.828	-20.9215	0.804158	0.0577922	0.670649	NotSig	-0.348488	small	20.0108	22.1194	17.9022	0.379632	-0.766101	0.809343	0.443616	0.999837	Not Sig	nonsignificant	.	.	isocitrate dehydrogenase (NADP(+)) 2 [Source:RGD Symbol;Acc:1597139]
Sh3gl3	chr1	134	115	86.1918	73.6047	12.5871	1.17101	0.0580144	0.670649	NotSig	0.231652	small	32.558	33.6444	31.4716	0.282522	-0.482789	0.935418	0.629246	0.999837	Not Sig	nonsignificant	.	Y	SH3 domain containing GRB2 like 3, endophilin A3 [Source:RGD Symbol;Acc:620578]
Tlcd3b	chr1	109	77	64.4668	77.4408	-12.974	0.832466	0.0580142	0.670649	NotSig	-0.363327	small	20.9325	20.5269	21.3381	0.363011	0.154879	1.03952	0.876917	0.999837	Not Sig	nonsignificant	.	.	TLC domain containing 3B [Source:RGD Symbol;Acc:1308215]
Cdc42ep4	chr10	125	110	67.3317	81.1419	-13.8102	0.829802	0.0579351	0.670649	NotSig	-0.26246	small	10.9525	10.4367	11.4682	0.45639	0.187967	1.09884	0.850902	0.999837	Not Sig	nonsignificant	.	.	CDC42 effector protein 4 [Source:RGD Symbol;Acc:1311567]
LOC100365839	chr11	163	100	56.2118	48.3696	7.84216	1.16213	0.0581157	0.670649	NotSig	0.254205	small	50.5555	44.3254	56.7856	0.25539	1.36922	1.28111	0.17093	0.999837	Not Sig	nonsignificant	.	.	40S ribosomal protein S3a-like [Source:RGD Symbol;Acc:2318248]
LOC120093525	chr7	65	65	103.3	82.8119	20.4881	1.2474	0.0577439	0.670649	NotSig	0.303539	small	17.2945	20.3208	14.2682	0.373136	-1.1943	0.702145	0.232359	0.999837	Not Sig	nonsignificant	.	.	myosin light chain 6B [Source:RGD Symbol;Acc:41207417]
Ywhag	chr12	1729	1273	118.618	115.711	2.90695	1.02512	0.0585972	0.672532	NotSig	0.0802213	negligible	340.582	323.101	358.062	0.157183	0.839361	1.1082	0.401267	0.999837	Not Sig	nonsignificant	.	.	tyrosine 3-monooxygenase/tryptophan 5-monooxygenase activation protein, gamma [Source:RGD Symbol;Acc:62002]
Bloc1s4	chr14	37	30	94.99	60.6457	34.3443	1.56631	0.0585584	0.672532	NotSig	0.544645	medium	6.85249	6.15494	7.55003	0.57536	0.266261	1.22666	0.790038	0.999837	Not Sig	nonsignificant	.	.	biogenesis of lysosomal organelles complex 1 subunit 4 [Source:RGD Symbol;Acc:1306037]
Ndrg4	chr19	1848	1359	107.718	114.034	-6.31533	0.944619	0.0584597	0.672532	NotSig	-0.0708231	negligible	320.407	313.255	327.56	0.152682	0.422032	1.04567	0.673001	0.999837	Not Sig	nonsignificant	.	Y	NDRG family member 4 [Source:RGD Symbol;Acc:621593]
Alg5	chr2	38	29	115.632	80.9952	34.637	1.42764	0.0584658	0.672532	NotSig	0.505844	medium	9.87073	11.0286	8.71289	0.497218	-0.780394	0.790028	0.435159	0.999837	Not Sig	nonsignificant	.	.	ALG5, dolichyl-phosphate beta-glucosyltransferase [Source:RGD Symbol;Acc:1308900]
Pkig	chr3	190	133	78.508	90.3367	-11.8287	0.86906	0.0590972	0.676418	NotSig	-0.204873	small	40.331	37.7487	42.9133	0.268132	0.556423	1.13682	0.577922	0.999837	Not Sig	nonsignificant	Y	.	cAMP-dependent protein kinase inhibitor gamma [Source:RGD Symbol;Acc:628775]
Ociad1	chr14	527	400	101.169	110.015	-8.84613	0.919592	0.0591848	0.676541	NotSig	-0.138825	negligible	110.757	103.255	118.259	0.183727	0.850745	1.14531	0.394911	0.999837	Not Sig	nonsignificant	.	.	OCIA domain containing 1 [Source:RGD Symbol;Acc:1359549]
Hccs	chrX	36	21	112.963	81.1223	31.8403	1.3925	0.0592455	0.676541	NotSig	0.338945	small	6.94026	6.0361	7.84443	0.573517	0.784458	1.29959	0.432772	0.999837	Not Sig	nonsignificant	.	Y	holocytochrome c synthase [Source:RGD Symbol;Acc:1563855]
Ctsb	chr15	697	521	98.7044	108.117	-9.41306	0.912937	0.0593297	0.676716	NotSig	-0.147256	negligible	153.944	155.004	152.884	0.158976	-0.0251907	0.986324	0.979903	0.999837	Not Sig	nonsignificant	.	.	cathepsin B [Source:RGD Symbol;Acc:621509]
Tmem218	chr8	47	31	70.4953	101.267	-30.7716	0.696133	0.0595675	0.67676	NotSig	-0.393995	small	10.7201	9.26366	12.1765	0.505273	0.70253	1.31444	0.482349	0.999837	Not Sig	nonsignificant	.	.	transmembrane protein 218 [Source:RGD Symbol;Acc:1311364]
Bfar	chr10	25	20	123.406	70.6659	52.7402	1.74633	0.0594981	0.67676	NotSig	0.592184	medium	5.98379	6.00419	5.96338	0.663046	-0.0146892	0.993203	0.98828	0.999837	Not Sig	nonsignificant	.	Y	bifunctional apoptosis regulator [Source:RGD Symbol;Acc:1304791]
Stat3	chr10	76	32	118.262	89.0711	29.191	1.32773	0.0595707	0.67676	NotSig	0.376589	small	7.54519	5.40013	9.69024	0.56551	1.14938	1.79444	0.250401	0.999837	Not Sig	nonsignificant	.	Y	signal transducer and activator of transcription 3 [Source:RGD Symbol;Acc:3772]
Srm	chr5	111	69	68.3257	87.7213	-19.3956	0.778896	0.0600932	0.679903	NotSig	-0.278306	small	25.0542	21.8806	28.2278	0.308966	1.21167	1.29008	0.225639	0.999837	Not Sig	nonsignificant	.	.	spermidine synthase [Source:RGD Symbol;Acc:620796]
Camkk2	chr12	125	102	124.053	106.912	17.1409	1.16033	0.0606026	0.684221	NotSig	0.207264	small	15.0566	13.5111	16.6021	0.408877	0.378521	1.22878	0.705044	0.999837	Not Sig	nonsignificant	Y	Y	calcium/calmodulin-dependent protein kinase kinase 2 [Source:RGD Symbol;Acc:620092]
Uqcr11	chr7	1362	1042	103.641	106.366	-2.72514	0.97438	0.0607017	0.684221	NotSig	-0.0673418	negligible	298.471	295.568	301.373	0.125291	0.215538	1.01964	0.829348	0.999837	Not Sig	nonsignificant	.	.	ubiquinol-cytochrome c reductase, complex III subunit XI [Source:RGD Symbol;Acc:1590985]
Rbx1	chr7	295	216	74.7207	85.4339	-10.7132	0.874602	0.0606275	0.684221	NotSig	-0.158589	negligible	57.1649	57.5865	56.7432	0.212531	-0.160777	0.985355	0.872269	0.999837	Not Sig	nonsignificant	.	.	ring-box 1 [Source:RGD Symbol;Acc:1308453]
Tagln3	chr11	776	651	87.7241	93.5781	-5.85405	0.937442	0.0611558	0.685614	NotSig	-0.113556	negligible	195.077	197.867	192.286	0.149219	-0.365287	0.971792	0.714897	0.999837	Not Sig	nonsignificant	.	.	transgelin 3 [Source:RGD Symbol;Acc:69301]
Ndufa7	chr7	348	241	74.9486	83.0291	-8.08049	0.902679	0.0611218	0.685614	NotSig	-0.143415	negligible	63.702	55.5622	71.8417	0.208933	1.58771	1.293	0.112351	0.999837	Not Sig	nonsignificant	.	.
Usp2	chr8	157	69	98.5622	83.0972	15.4649	1.18611	0.0610209	0.685614	NotSig	0.273334	small	19.0713	12.4646	25.678	0.482546	1.96669	2.06008	0.0492191	0.999837	Not Sig	nonsignificant	.	.	ubiquitin specific peptidase 2 [Source:RGD Symbol;Acc:621073]
Rfng	chr10	82	83	80.0648	98.112	-18.0472	0.816055	0.0613755	0.686255	NotSig	-0.292316	small	21.721	25.3533	18.0886	0.350844	-1.23933	0.713464	0.215224	0.999837	Not Sig	nonsignificant	.	.	RFNG O-fucosylpeptide 3-beta-N-acetylglucosaminyltransferase [Source:RGD Symbol;Acc:621322]
Atp1b1	chr13	3153	2240	105.36	103.237	2.12288	1.02056	0.0614223	0.686255	NotSig	0.0487427	negligible	452.966	439.004	466.929	0.141361	0.634627	1.06361	0.525672	0.999837	Not Sig	nonsignificant	.	.	ATPase Na+/K+ transporting subunit beta 1 [Source:RGD Symbol;Acc:2170]
Adora1	chr13	275	188	95.8031	104.588	-8.78499	0.916004	0.0615703	0.687127	NotSig	-0.139701	negligible	16.5048	16.0068	17.0027	0.436607	0.33912	1.06222	0.734519	0.999837	Not Sig	nonsignificant	.	Y	adenosine A1 receptor [Source:RGD Symbol;Acc:2048]
Tpm3	chr2	244	188	98.6286	87.9384	10.6902	1.12156	0.0616774	0.687542	NotSig	0.161106	negligible	46.361	44.8928	47.8292	0.247407	0.136653	1.06541	0.891305	0.999837	Not Sig	nonsignificant	.	.	tropomyosin 3 [Source:RGD Symbol;Acc:621546]
Lcmt1	chr1	117	113	72.3601	87.939	-15.5789	0.822844	0.0619921	0.688707	NotSig	-0.282428	small	29.7068	31.7173	27.6962	0.288306	-0.713469	0.873219	0.475556	0.999837	Not Sig	nonsignificant	.	.	leucine carboxyl methyltransferase 1 [Source:RGD Symbol;Acc:735118]
Kif2a	chr2	96	74	101.839	82.5338	19.3053	1.23391	0.0619032	0.688707	NotSig	0.279699	small	14.9517	14.5313	15.3722	0.41837	0.345108	1.05787	0.730013	0.999837	Not Sig	nonsignificant	.	Y	kinesin family member 2A [Source:RGD Symbol;Acc:70974]
Vps16	chr3	56	27	80.4481	117.012	-36.5635	0.687523	0.0619861	0.688707	NotSig	-0.342702	small	10.429	8.02006	12.8379	0.47275	1.39033	1.60073	0.164429	0.999837	Not Sig	nonsignificant	.	.	VPS16 core subunit of CORVET and HOPS complexes [Source:RGD Symbol;Acc:1359414]
Nr1d1	chr10	126	103	79.3446	68.5773	10.7673	1.15701	0.0620717	0.688813	NotSig	0.23782	small	30.0134	29.9769	30.0499	0.31478	-0.0964905	1.00243	0.923131	0.999837	Not Sig	nonsignificant	.	.	nuclear receptor subfamily 1, group D, member 1 [Source:RGD Symbol;Acc:628827]
Eif4g2	chr1	735	540	117.228	107.185	10.0432	1.0937	0.0624016	0.690915	NotSig	0.121336	negligible	103.367	100.353	106.381	0.173185	0.373313	1.06007	0.708916	0.999837	Not Sig	nonsignificant	.	Y	eukaryotic translation initiation factor 4, gamma 2 [Source:RGD Symbol;Acc:1305294]
Zfp717	chr8	79	53	99.0627	126.799	-27.7364	0.781257	0.062334	0.690915	NotSig	-0.386451	small	10.7394	11.6693	9.80956	0.485412	-0.57902	0.84063	0.562576	0.999837	Not Sig	nonsignificant	.	.	zinc finger protein 717 [Source:RGD Symbol;Acc:2319964]
Spint2	chr1	99	87	73.2834	92.1343	-18.8509	0.795398	0.06304	0.69201	NotSig	-0.260395	small	23.826	26.9525	20.6995	0.338767	-0.900279	0.768	0.367972	0.999837	Not Sig	nonsignificant	.	.	serine peptidase inhibitor, Kunitz type, 2 [Source:RGD Symbol;Acc:735123]
Vmp1	chr10	163	116	85.4345	99.9666	-14.5322	0.85463	0.0629721	0.69201	NotSig	-0.257886	small	36.6059	34.6749	38.537	0.255828	0.536427	1.11138	0.591663	0.999837	Not Sig	nonsignificant	.	.	vacuole membrane protein 1 [Source:RGD Symbol;Acc:70367]
Basp1	chr2	1235	956	77.768	82.3104	-4.54237	0.944814	0.0628882	0.69201	NotSig	-0.0770637	negligible	219.712	210.235	229.19	0.163399	0.636735	1.09016	0.524297	0.999837	Not Sig	nonsignificant	.	.	brain abundant, membrane attached signal protein 1 [Source:RGD Symbol;Acc:621491]
Nrbp2	chr7	76	52	136.455	101.999	34.4564	1.33781	0.0631339	0.69201	NotSig	0.301093	small	15.1035	15.6488	14.5582	0.40791	-0.228599	0.930308	0.819181	0.999837	Not Sig	nonsignificant	.	.	nuclear receptor binding protein 2 [Source:RGD Symbol;Acc:1591749]
Map3k11	chr1	32	16	74.3145	41.3403	32.9742	1.79763	0.0629645	0.69201	NotSig	0.347945	small	5.94475	4.46176	7.42774	0.622409	1.10076	1.66476	0.271002	0.999837	Not Sig	nonsignificant	.	.	mitogen-activated protein kinase kinase kinase 11 [Source:RGD Symbol;Acc:1359261]
Gas7	chr10	239	189	86.9474	101.105	-14.1571	0.859975	0.0633395	0.692719	NotSig	-0.151527	negligible	14.1335	15.6498	12.6172	0.41235	-0.694905	0.806222	0.487115	0.999837	Not Sig	nonsignificant	.	.	growth arrest specific 7 [Source:RGD Symbol;Acc:621550]
Dcun1d5	chr8	88	62	100.685	84.9493	15.736	1.18524	0.0633307	0.692719	NotSig	0.310367	small	20.257	18.8252	21.6887	0.346143	0.657099	1.15211	0.511117	0.999837	Not Sig	nonsignificant	Y	.	defective in cullin neddylation 1 domain containing 5 [Source:RGD Symbol;Acc:1307008]
Usp34	chr14	46	52	130.9	91.5808	39.3191	1.42934	0.063673	0.69415	NotSig	0.351746	small	11.0207	11.9609	10.0805	0.462792	-0.723678	0.842792	0.469264	0.999837	Not Sig	nonsignificant	.	Y	ubiquitin specific peptidase 34 [Source:RGD Symbol;Acc:1565181]
Col1a2	chr4	11	30	64.8334	85.7997	-20.9664	0.755636	0.0637528	0.69415	NotSig	-0.520852	medium	8.87102	15.3036	2.43843	1.26766	-2.01811	0.159337	0.0435799	0.999837	Not Sig	nonsignificant	.	.	collagen type I alpha 2 chain [Source:RGD Symbol;Acc:621351]
Pwwp2b	chr1	39	48	56.4797	80.3039	-23.8242	0.703324	0.063996	0.696027	NotSig	-0.420439	small	10.1316	12.8618	7.40149	0.484065	-1.60998	0.575463	0.107402	0.999837	Not Sig	nonsignificant	.	.	PWWP domain containing 2B [Source:RGD Symbol;Acc:1307108]
Naa60	chr10	98	106	78.6304	97.0132	-18.3827	0.810513	0.0640713	0.696054	NotSig	-0.287991	small	23.4124	23.5796	23.2452	0.326195	-0.190061	0.985815	0.849261	0.999837	Not Sig	nonsignificant	Y	.	N(alpha)-acetyltransferase 60, NatF catalytic subunit [Source:RGD Symbol;Acc:1308915]
Lmo1	chr1	86	77	78.1491	96.7321	-18.583	0.807892	0.0647971	0.698707	NotSig	-0.322431	small	21.1574	22.94	19.3748	0.332609	-0.721748	0.844588	0.470449	0.999837	Not Sig	nonsignificant	.	.	LIM domain only 1 [Source:RGD Symbol;Acc:621166]
Zfp777	chr4	41	32	55.0495	80.9346	-25.8851	0.680172	0.064943	0.698707	NotSig	-0.454523	small	6.81469	6.93636	6.69303	0.585291	0.0707402	0.96492	0.943605	0.999837	Not Sig	nonsignificant	.	.	zinc finger protein 777 [Source:RGD Symbol;Acc:1566056]
Emc1	chr5	94	82	87.3638	105.216	-17.8525	0.830326	0.064858	0.698707	NotSig	-0.353731	small	13.7245	14.3427	13.1063	0.406714	-0.437894	0.913793	0.661463	0.999837	Not Sig	nonsignificant	.	.	ER membrane protein complex subunit 1 [Source:RGD Symbol;Acc:1310427]
LOC108351058	chr5	122	85	60.9288	71.7003	-10.7715	0.84977	0.0650951	0.698707	NotSig	-0.214807	small	39.7569	40.2965	39.2174	0.264509	-0.18578	0.973222	0.852617	0.999837	Not Sig	nonsignificant	.	.
Dhrs7	chr6	92	46	69.1377	96.3603	-27.2226	0.717491	0.0650068	0.698707	NotSig	-0.24462	small	19.644	14.8388	24.4492	0.350782	1.92945	1.64766	0.0536745	0.999837	Not Sig	nonsignificant	.	.	dehydrogenase/reductase 7 [Source:RGD Symbol;Acc:1565002]
Grina	chr7	1465	1102	83.9029	87.3508	-3.44781	0.960529	0.0650684	0.698707	NotSig	-0.0685432	negligible	334.135	329.196	339.073	0.146802	0.324417	1.03	0.745623	0.999837	Not Sig	nonsignificant	.	.	glutamate ionotropic receptor NMDA type subunit associated protein 1 [Source:RGD Symbol;Acc:628873]
Hif1a	chr6	111	76	106.87	90.0606	16.8093	1.18664	0.0649228	0.698707	NotSig	0.247482	small	22.7575	23.9179	21.5971	0.344095	-0.349389	0.902969	0.726797	0.999837	Not Sig	nonsignificant	.	.	hypoxia inducible factor 1 subunit alpha [Source:RGD Symbol;Acc:61928]
Usp36	chr10	49	31	151.735	106.441	45.2934	1.42552	0.0654646	0.701142	NotSig	0.416306	small	7.19659	5.20611	9.18706	0.594572	1.34719	1.76467	0.177918	0.999837	Not Sig	nonsignificant	.	.	ubiquitin specific peptidase 36 [Source:RGD Symbol;Acc:1309937]
Aacs	chr12	40	41	125.93	97.7055	28.225	1.28888	0.0654527	0.701142	NotSig	0.423439	small	9.12731	10.3967	7.85789	0.500655	-0.815662	0.755803	0.414694	0.999837	Not Sig	nonsignificant	.	Y	acetoacetyl-CoA synthetase [Source:RGD Symbol;Acc:708522]
Ehbp1	chr14	45	33	100.113	64.1794	35.9337	1.55989	0.0656403	0.702258	NotSig	0.34172	small	9.3877	8.51427	10.2611	0.492689	0.327138	1.20517	0.743564	0.999837	Not Sig	nonsignificant	.	.	EH domain binding protein 1 [Source:RGD Symbol;Acc:1310604]
Rpp14	chr15	42	34	84.3187	105.144	-20.8249	0.801938	0.0659478	0.704781	NotSig	-0.502991	medium	9.66629	10.3466	8.98601	0.511924	-0.486536	0.868502	0.626587	0.999837	Not Sig	nonsignificant	.	.	ribonuclease P/MRP subunit p14 [Source:RGD Symbol;Acc:1305436]
Serf1	chr2	58	54	79.9925	107.753	-27.7603	0.74237	0.0661797	0.704961	NotSig	-0.325902	small	13.5425	14.0744	13.0105	0.417746	-0.343779	0.924405	0.731013	0.999837	Not Sig	nonsignificant	.	.	small EDRK-rich factor 1 [Source:RGD Symbol;Acc:1565105]
Wdtc1	chr5	125	80	73.1495	93.3073	-20.1578	0.783964	0.066063	0.704961	NotSig	-0.250974	small	21.5693	18.7189	24.4196	0.338764	1.05414	1.30454	0.29182	0.999837	Not Sig	nonsignificant	.	.	WD and tetratricopeptide repeats 1 [Source:RGD Symbol;Acc:1310362]
Acy1	chr8	49	37	122.222	96.6632	25.5584	1.26441	0.0663274	0.705769	NotSig	0.335686	small	12.1595	13.3593	10.9596	0.470303	-0.3273	0.820372	0.743441	0.999837	Not Sig	nonsignificant	.	.	aminoacylase 1 [Source:RGD Symbol;Acc:2030]
Add1	chr14	399	311	74.6918	83.0464	-8.35465	0.899398	0.0664507	0.706239	NotSig	-0.153723	negligible	65.1619	65.7044	64.6195	0.227909	-0.262637	0.983488	0.79283	0.999837	Not Sig	nonsignificant	.	Y	adducin 1 [Source:RGD Symbol;Acc:2041]
Wtap	chr1	87	75	96.9947	74.5642	22.4305	1.30082	0.0668918	0.706269	NotSig	0.26913	small	19.2542	20.6726	17.8357	0.349873	-0.744606	0.862771	0.45651	0.999837	Not Sig	nonsignificant	.	Y	WT1 associated protein [Source:RGD Symbol;Acc:1563824]
Tmem160	chr1	247	203	60.9142	68.7038	-7.7896	0.886621	0.0679064	0.706269	NotSig	-0.217094	small	54.1022	54.6107	53.5937	0.221959	-0.162324	0.981376	0.87105	0.999837	Not Sig	nonsignificant	.	.	transmembrane protein 160 [Source:RGD Symbol;Acc:1564549]
Rnf130	chr10	139	89	96.797	112.759	-15.9617	0.858444	0.0701087	0.706269	NotSig	-0.243765	small	15.2297	14.6067	15.8527	0.39212	0.229245	1.0853	0.818678	0.999837	Not Sig	nonsignificant	.	Y	ring finger protein 130 [Source:RGD Symbol;Acc:1562041]
Hist3h2ba	chr10	184	122	97.9025	84.3865	13.5159	1.16017	0.0685961	0.706269	NotSig	0.228415	small	39.1688	33.0002	45.3373	0.271571	1.5508	1.37385	0.120949	0.999837	Not Sig	nonsignificant	.	.	histone cluster 3, H2ba [Source:RGD Symbol;Acc:1307520]
Mrpl55	chr10	86	73	75.2647	61.2698	13.9949	1.22841	0.0706325	0.706269	NotSig	0.156578	negligible	21.1958	19.652	22.7396	0.351551	0.442382	1.15711	0.658213	0.999837	Not Sig	nonsignificant	.	.	mitochondrial ribosomal protein L55 [Source:RGD Symbol;Acc:1308161]
LOC120095139	chr10	126	49	137.721	110.711	27.0091	1.24396	0.0706284	0.706269	NotSig	0.312876	small	20.6122	13.144	28.0804	0.363404	2.83199	2.13637	0.0046259	0.290727	Not Sig	nonsignificant	.	.
Atp6v1a	chr11	692	531	96.8289	107.481	-10.6526	0.900889	0.0707107	0.706269	NotSig	-0.102213	negligible	116.765	110.119	123.411	0.192891	0.627514	1.12071	0.530323	0.999837	Not Sig	nonsignificant	.	.	ATPase H+ transporting V1 subunit A [Source:RGD Symbol;Acc:1596464]
Timmdc1	chr11	66	51	62.3294	78.1657	-15.8364	0.7974	0.0688298	0.706269	NotSig	-0.375567	small	13.4551	12.0406	14.8697	0.433122	0.383298	1.23497	0.701499	0.999837	Not Sig	nonsignificant	.	.	translocase of inner mitochondrial membrane domain containing 1 [Source:RGD Symbol;Acc:1359380]
Gltp	chr12	66	40	66.9371	86.1965	-19.2594	0.776564	0.0709717	0.706269	NotSig	-0.381837	small	13.6355	12.0717	15.1994	0.422431	0.72588	1.2591	0.467912	0.999837	Not Sig	nonsignificant	.	.	glycolipid transfer protein [Source:RGD Symbol;Acc:1564442]
Brinp2	chr13	115	90	71.8994	92.304	-20.4046	0.778941	0.0700775	0.706269	NotSig	-0.221143	small	19.4773	18.7334	20.2212	0.410989	0.249061	1.07942	0.803313	0.999837	Not Sig	nonsignificant	.	Y	BMP/retinoic acid inducible neural specific 2 [Source:RGD Symbol;Acc:708419]
Ccdc25	chr15	50	29	113.038	79.7645	33.2733	1.41714	0.0678875	0.706269	NotSig	0.370759	small	10.021	10.4487	9.59332	0.493524	-0.138405	0.918132	0.889921	0.999837	Not Sig	nonsignificant	Y	.	coiled-coil domain containing 25 [Source:RGD Symbol;Acc:1307689]
Cbr4	chr16	31	26	86.5437	116.204	-29.6599	0.744759	0.0677474	0.706269	NotSig	-0.356052	small	6.02747	5.337	6.71794	0.64653	0.275885	1.25875	0.782636	0.999837	Not Sig	nonsignificant	.	.	carbonyl reductase 4 [Source:RGD Symbol;Acc:727826]
Smim3	chr18	36	28	82.4417	117.808	-35.366	0.699799	0.0666613	0.706269	NotSig	-0.547596	medium	6.43722	6.72605	6.1484	0.608987	-0.259822	0.914118	0.795001	0.999837	Not Sig	nonsignificant	.	.	small integral membrane protein 3 [Source:RGD Symbol;Acc:628864]
Necab2	chr19	261	175	100.207	113.123	-12.9164	0.88582	0.0705099	0.706269	NotSig	-0.195044	negligible	58.0209	55.4942	60.5476	0.219542	0.600141	1.09106	0.548412	0.999837	Not Sig	nonsignificant	.	.	N-terminal EF-hand calcium binding protein 2 [Source:RGD Symbol;Acc:621844]
RGD1304884	chr19	180	145	98.9572	85.5057	13.4515	1.15732	0.0671463	0.706269	NotSig	0.19287	negligible	11.6341	12.8952	10.373	0.526754	-0.403233	0.804407	0.686777	0.999837	Not Sig	nonsignificant	.	Y	similar to RIKEN cDNA 6430548M08 [Source:RGD Symbol;Acc:1304884]
Gpx8	chr2	35	23	89.3953	61.4412	27.9541	1.45497	0.0699345	0.706269	NotSig	0.456339	small	7.65062	7.80962	7.49162	0.549184	0.117166	0.95928	0.906729	0.999837	Not Sig	nonsignificant	.	Y	glutathione peroxidase 8 [Source:RGD Symbol;Acc:1307506]
LOC120093056	chr2	1101	887	59.4125	62.1024	-2.68987	0.956686	0.0696962	0.706269	NotSig	-0.0488844	negligible	20.3718	21.8938	18.8497	0.364674	-0.776853	0.86096	0.437246	0.999837	Not Sig	nonsignificant	.	.
Syngap1	chr20	328	283	78.3434	88.9449	-10.6014	0.880809	0.0686435	0.706269	NotSig	-0.107926	negligible	49.3993	52.2592	46.5394	0.234582	-0.770123	0.89055	0.441227	0.999837	Not Sig	nonsignificant	.	Y	synaptic Ras GTPase activating protein 1 [Source:RGD Symbol;Acc:621090]
Sumo3	chr20	132	109	91.5975	79.5819	12.0156	1.15098	0.070425	0.706269	NotSig	0.208973	small	20.7864	20.3444	21.2284	0.359546	-0.0641606	1.04345	0.948842	0.999837	Not Sig	nonsignificant	.	.	small ubiquitin-like modifier 3 [Source:RGD Symbol;Acc:1561022]
Snx3	chr20	602	425	89.7137	81.4984	8.21534	1.1008	0.0698209	0.706269	NotSig	0.0878405	negligible	138.227	133.982	142.473	0.157835	0.61843	1.06337	0.536292	0.999837	Not Sig	nonsignificant	.	.	sorting nexin 3 [Source:RGD Symbol;Acc:1595151]
Ptpa	chr3	221	201	77.3526	89.1369	-11.7844	0.867795	0.0687411	0.706269	NotSig	-0.147122	negligible	44.3039	45.8269	42.781	0.243173	-0.27531	0.933535	0.783078	0.999837	Not Sig	nonsignificant	.	.	protein phosphatase 2 phosphatase activator [Source:RGD Symbol;Acc:1308354]
Gtdc1	chr3	55	42	70.1242	101.354	-31.2299	0.691873	0.0687151	0.706269	NotSig	-0.368955	small	12.7023	12.8055	12.599	0.437493	-0.0647478	0.983874	0.948375	0.999837	Not Sig	nonsignificant	.	Y	glycosyltransferase-like domain containing 1 [Source:RGD Symbol;Acc:1563393]
Lnpk	chr3	89	63	97.1804	123.947	-26.7662	0.78405	0.0702564	0.706269	NotSig	-0.282929	small	11.6532	12.6168	10.6896	0.451717	-0.495693	0.847247	0.620111	0.999837	Not Sig	nonsignificant	.	Y	lunapark, ER junction formation factor [Source:RGD Symbol;Acc:1312042]
Smox	chr3	79	57	111.728	88.9954	22.7325	1.25543	0.0698705	0.706269	NotSig	0.307955	small	17.4061	17.9434	16.8689	0.380747	-0.302671	0.940119	0.762141	0.999837	Not Sig	nonsignificant	.	.	spermine oxidase [Source:RGD Symbol;Acc:1306049]
Tomm7	chr4	371	222	81.3248	73.2763	8.04857	1.10984	0.067353	0.706269	NotSig	0.145706	negligible	74.7902	64.2929	85.2876	0.202995	1.87718	1.32655	0.0604933	0.999837	Not Sig	nonsignificant	.	.	translocase of outer mitochondrial membrane 7 [Source:RGD Symbol;Acc:1591393]
Ddx47	chr4	42	20	104.513	58.7664	45.7464	1.77845	0.067292	0.706269	NotSig	0.449043	small	6.99367	6.23079	7.75654	0.611806	0.75011	1.24487	0.453189	0.999837	Not Sig	nonsignificant	.	.	DEAD-box helicase 47 [Source:RGD Symbol;Acc:1310437]
LOC100362298	chr5	37	15	43.852	29.1726	14.6794	1.50319	0.0705913	0.706269	NotSig	0.30429	small	6.76763	3.84989	9.68537	0.606477	2.01789	2.51575	0.0436025	0.999837	Not Sig	nonsignificant	.	.
Mcfd2	chr6	78	51	77.1524	104.472	-27.3193	0.7385	0.0689824	0.706269	NotSig	-0.312778	small	15.1985	15.3989	14.9982	0.386811	-0.206178	0.973979	0.836652	0.999837	Not Sig	nonsignificant	Y	.	multiple coagulation factor deficiency 2 [Source:RGD Symbol;Acc:628690]
Ap3d1	chr7	230	190	71.5191	82.955	-11.4359	0.862143	0.0709343	0.706269	NotSig	-0.198742	negligible	50.5414	51.6095	49.4734	0.241419	-0.272881	0.95861	0.784945	0.999837	Not Sig	nonsignificant	.	.	adaptor related protein complex 3 subunit delta 1 [Source:RGD Symbol;Acc:1308659]
Mknk2	chr7	99	57	115.999	94.3059	21.6934	1.23003	0.0704566	0.706269	NotSig	0.308924	small	12.0281	8.65272	15.4035	0.453151	1.62265	1.7802	0.104665	0.999837	Not Sig	nonsignificant	.	Y	MAPK interacting serine/threonine kinase 2 [Source:RGD Symbol;Acc:1305728]
Cct2	chr7	232	177	89.0504	76.1162	12.9343	1.16993	0.0685937	0.706269	NotSig	0.196853	negligible	55.6679	55.4256	55.9102	0.229868	0.0276095	1.00874	0.977974	0.999837	Not Sig	nonsignificant	.	.	chaperonin containing TCP1 subunit 2 [Source:RGD Symbol;Acc:1359143]
Tsfm	chr7	73	51	73.2208	97.3137	-24.0929	0.75242	0.0667633	0.706269	NotSig	-0.427634	small	14.2435	13.0513	15.4356	0.413635	0.544419	1.18269	0.586153	0.999837	Not Sig	nonsignificant	.	.	Ts translation elongation factor, mitochondrial [Source:RGD Symbol;Acc:1593058]
Mal2	chr7	188	167	75.0785	87.2562	-12.1776	0.860438	0.0684325	0.706269	NotSig	-0.21943	small	36.08	39.0329	33.1271	0.25598	-0.912484	0.848698	0.361514	0.999837	Not Sig	nonsignificant	.	Y	mal, T-cell differentiation protein 2 [Source:RGD Symbol;Acc:735066]
Ly6e	chr7	467	373	80.1214	87.5158	-7.39442	0.915508	0.0702927	0.706269	NotSig	-0.117464	negligible	110.325	113.478	107.172	0.166851	-0.489247	0.944431	0.624667	0.999837	Not Sig	nonsignificant	.	.	lymphocyte antigen 6 family member E [Source:RGD Symbol;Acc:1565342]
Yaf2	chr7	187	165	95.3128	107.277	-11.9646	0.888471	0.0705982	0.706269	NotSig	-0.18216	negligible	44.0359	46.5155	41.5563	0.258023	-0.687575	0.893386	0.49172	0.999837	Not Sig	nonsignificant	.	.	YY1 associated factor 2 [Source:RGD Symbol;Acc:1582851]
Oaf	chr8	78	56	61.9176	45.4075	16.5101	1.3636	0.067335	0.706269	NotSig	0.254354	small	15.4892	12.4507	18.5277	0.421821	0.987341	1.48808	0.323476	0.999837	Not Sig	nonsignificant	.	Y	out at first homolog [Source:RGD Symbol;Acc:1305890]
Nectin1	chr8	175	114	89.9812	78.0622	11.919	1.15269	0.0684702	0.706269	NotSig	0.253532	small	10.6222	10.2323	11.012	0.559343	0.108676	1.07619	0.913459	0.999837	Not Sig	nonsignificant	.	.	nectin cell adhesion molecule 1 [Source:RGD Symbol;Acc:620791]
Rps27l	chr8	37	28	62.8081	89.6894	-26.8814	0.700284	0.0674603	0.706269	NotSig	-0.445999	small	8.51286	9.40118	7.62453	0.559362	-0.327087	0.811018	0.743602	0.999837	Not Sig	nonsignificant	.	.	ribosomal protein S27-like [Source:RGD Symbol;Acc:1595396]
Scg3	chr8	503	437	97.4814	92.1143	5.36717	1.05827	0.067809	0.706269	NotSig	0.139129	negligible	120.131	125.121	115.14	0.166907	-0.919463	0.920231	0.357854	0.999837	Not Sig	nonsignificant	.	.	secretogranin III [Source:RGD Symbol;Acc:621209]
Uba5	chr8	89	74	80.4112	99.7484	-19.3371	0.806141	0.0692675	0.706269	NotSig	-0.257685	small	20.2807	21.0375	19.524	0.33696	-0.420599	0.928054	0.674048	0.999837	Not Sig	nonsignificant	.	.	ubiquitin-like modifier activating enzyme 5 [Source:RGD Symbol;Acc:1311702]
Tmem108	chr8	40	33	117.359	72.8071	44.552	1.61192	0.0699298	0.706269	NotSig	0.331268	small	6.65635	6.94576	6.36693	0.599697	0.0369349	0.916664	0.970537	0.999837	Not Sig	nonsignificant	.	Y	transmembrane protein 108 [Source:RGD Symbol;Acc:1311530]
Pam	chr9	243	180	106.724	97.6808	9.04309	1.09258	0.0699331	0.706269	NotSig	0.183003	negligible	50.5925	47.2967	53.8884	0.25445	0.751642	1.13937	0.452266	0.999837	Not Sig	nonsignificant	.	.	peptidylglycine alpha-amidating monooxygenase [Source:RGD Symbol;Acc:3252]
Gpc3	chrX	42	29	84.1192	101.079	-16.9597	0.832213	0.0706619	0.706269	NotSig	-0.532718	medium	9.63678	9.26471	10.0089	0.472227	0.197451	1.08032	0.843475	0.999837	Not Sig	nonsignificant	.	.	glypican 3 [Source:RGD Symbol;Acc:2725]
Tab2	chr1	58	40	112.986	81.9188	31.0667	1.37924	0.0707364	0.706269	NotSig	0.363386	small	8.09769	6.53652	9.65887	0.536755	1.15785	1.47768	0.246923	0.999837	Not Sig	nonsignificant	Y	Y	TGF-beta activated kinase 1/MAP3K7 binding protein 2 [Source:RGD Symbol;Acc:1309527]
Hmbs	chr8	28	28	69.7673	97.1216	-27.3542	0.718351	0.0701563	0.706269	NotSig	-0.357392	small	7.56733	9.86717	5.26749	0.571286	-1.49974	0.53384	0.133682	0.999837	Not Sig	nonsignificant	.	.	hydroxymethylbilane synthase [Source:RGD Symbol;Acc:2801]
Ift27	chr7	26	21	59.5717	84.0237	-24.4521	0.708986	0.0705614	0.706269	NotSig	-0.526036	medium	6.25157	6.27592	6.22721	0.619112	-0.115596	0.992239	0.907973	0.999837	Not Sig	nonsignificant	.	.	intraflagellar transport 27 [Source:RGD Symbol;Acc:1308703]
Sap130	chr18	48	35	76.6568	104.672	-28.0153	0.732352	0.0706834	0.706269	NotSig	-0.403741	small	8.30384	7.24117	9.36651	0.604506	0.348754	1.29351	0.727274	0.999837	Not Sig	nonsignificant	.	Y	Sin3A associated protein 130 [Source:RGD Symbol;Acc:1311657]
Ndufaf6	chr5	25	27	88.7018	68.6155	20.0862	1.29274	0.0683479	0.706269	NotSig	0.582771	medium	7.11552	7.38569	6.84535	0.59452	-0.447205	0.92684	0.654727	0.999837	Not Sig	nonsignificant	.	.	NADH:ubiquinone oxidoreductase complex assembly factor 6 [Source:RGD Symbol;Acc:1309085]
Lxn	chr2	38	26	89.6772	67.9265	21.7507	1.32021	0.0711126	0.706956	NotSig	0.551481	medium	8.11076	8.14805	8.07347	0.534575	0.142438	0.990847	0.886734	0.999837	Not Sig	nonsignificant	.	.	latexin [Source:RGD Symbol;Acc:68361]
Tpst1	chr12	46	33	78.5462	99.4455	-20.8993	0.789842	0.0711868	0.706979	NotSig	-0.398198	small	10.6204	10.2808	10.9599	0.454173	0.15058	1.06606	0.880307	0.999837	Not Sig	nonsignificant	.	Y	tyrosylprotein sulfotransferase 1 [Source:RGD Symbol;Acc:1308473]
Tmem60	chr4	45	51	61.7482	89.2367	-27.4886	0.691959	0.0714457	0.707406	NotSig	-0.394703	small	10.7067	11.374	10.0393	0.474592	-0.530587	0.882654	0.595705	0.999837	Not Sig	nonsignificant	.	.	transmembrane protein 60 [Source:RGD Symbol;Acc:1308939]
Ilf3	chr8	50	40	83.142	106.537	-23.3949	0.780406	0.0714175	0.707406	NotSig	-0.354087	small	10.4909	9.32785	11.654	0.462468	0.625711	1.24938	0.531505	0.999837	Not Sig	nonsignificant	.	Y	interleukin enhancer binding factor 3 [Source:RGD Symbol;Acc:619734]
Otud7a	chr1	83	57	98.9691	73.2533	25.7158	1.35105	0.0717758	0.707735	NotSig	0.268782	small	7.97493	9.39589	6.55397	0.631667	-0.467209	0.697536	0.640351	0.999837	Not Sig	nonsignificant	Y	.	OTU deubiquitinase 7A [Source:RGD Symbol;Acc:1563721]
Ndufs4	chr2	250	196	83.7129	93.6171	-9.90422	0.894205	0.0718914	0.707735	NotSig	-0.169479	negligible	52.1583	49.3816	54.935	0.237243	0.595449	1.11246	0.551543	0.999837	Not Sig	nonsignificant	.	.	NADH:ubiquinone oxidoreductase subunit S4 [Source:RGD Symbol;Acc:1594380]
Serpini1	chr2	310	227	111.516	104.847	6.66854	1.0636	0.072094	0.707735	NotSig	0.178384	negligible	62.9363	59.985	65.8877	0.221383	0.542516	1.0984	0.587463	0.999837	Not Sig	nonsignificant	.	.	serpin family I member 1 [Source:RGD Symbol;Acc:619896]
Snapin	chr2	112	84	88.7809	109.993	-21.2123	0.807149	0.0720023	0.707735	NotSig	-0.310034	small	17.3071	16.5776	18.0366	0.374435	0.0917425	1.08801	0.926903	0.999837	Not Sig	nonsignificant	.	.	SNAP-associated protein [Source:RGD Symbol;Acc:1560377]
Raver2	chr5	68	45	92.0527	121.854	-29.8014	0.755434	0.0722164	0.707735	NotSig	-0.318979	small	12.8707	12.9378	12.8035	0.469076	0.25241	0.989624	0.800724	0.999837	Not Sig	nonsignificant	.	Y	ribonucleoprotein, PTB-binding 2 [Source:RGD Symbol;Acc:1307610]
Fkbp3	chr6	344	260	83.8164	93.6712	-9.85484	0.894793	0.072212	0.707735	NotSig	-0.140154	negligible	76.4008	70.1681	82.6335	0.197546	0.996908	1.17765	0.318809	0.999837	Not Sig	nonsignificant	.	.	FKBP prolyl isomerase 3 [Source:RGD Symbol;Acc:1304992]
Nup88	chr10	41	20	78.8393	44.095	34.7443	1.78794	0.0722041	0.707735	NotSig	0.369014	small	7.68607	5.79297	9.57917	0.558771	1.06722	1.65359	0.28587	0.999837	Not Sig	nonsignificant	.	.	nucleoporin 88 [Source:RGD Symbol;Acc:620182]
Sipa1l2	chr19	51	45	56.0061	83.9041	-27.898	0.667502	0.0720274	0.707735	NotSig	-0.187124	negligible	9.32183	9.84363	8.80003	0.494922	-0.313392	0.893983	0.753983	0.999837	Not Sig	nonsignificant	.	.	signal-induced proliferation-associated 1 like 2 [Source:RGD Symbol;Acc:1306269]
Il11ra1	chr5	28	26	67.9781	97.6272	-29.6491	0.696303	0.071749	0.707735	NotSig	-0.471101	small	7.09993	7.65914	6.54073	0.572547	-0.383694	0.853977	0.701206	0.999837	Not Sig	nonsignificant	.	.	interleukin 11 receptor subunit alpha 1 [Source:RGD Symbol;Acc:621332]
Sumo1	chr9	269	211	75.6725	85.949	-10.2765	0.880435	0.0724315	0.707899	NotSig	-0.185437	negligible	60.3791	60.011	60.7472	0.214073	-0.0129604	1.01227	0.989659	0.999837	Not Sig	nonsignificant	.	Y	small ubiquitin-like modifier 1 [Source:RGD Symbol;Acc:1306919]
Jpt1	chr10	433	315	90.4386	82.9107	7.52789	1.0908	0.072505	0.707914	NotSig	0.105747	negligible	50.2263	49.7885	50.6641	0.229507	0.268948	1.01759	0.78797	0.999837	Not Sig	nonsignificant	.	.
Sv2b	chr1	312	234	107.036	115.637	-8.60156	0.925616	0.0726082	0.708115	NotSig	-0.141653	negligible	39.1059	40.2589	37.9529	0.290998	-0.0704119	0.942721	0.943866	0.999837	Not Sig	nonsignificant	Y	.	synaptic vesicle glycoprotein 2b [Source:RGD Symbol;Acc:619716]
Ica1	chr4	87	62	73.5782	92.4653	-18.8872	0.795738	0.072697	0.708115	NotSig	-0.285905	small	19.6728	18.5727	20.7728	0.340775	0.363767	1.11846	0.716032	0.999837	Not Sig	nonsignificant	Y	Y	islet cell autoantigen 1 [Source:RGD Symbol;Acc:621465]
Mycl	chr5	34	47	81.5507	107.983	-26.4323	0.755218	0.0727417	0.708115	NotSig	-0.499804	small	7.09666	9.43849	4.75482	0.601103	-1.50631	0.503769	0.131987	0.999837	Not Sig	nonsignificant	.	Y	MYCL proto-oncogene, bHLH transcription factor [Source:RGD Symbol;Acc:1588591]
Psmd13	chr1	195	150	84.9498	97.8083	-12.8585	0.868534	0.0745654	0.711914	NotSig	-0.202777	small	43.5776	40.2595	46.8956	0.254248	0.727353	1.16483	0.46701	0.999837	Not Sig	nonsignificant	.	Y	proteasome 26S subunit, non-ATPase 13 [Source:RGD Symbol;Acc:1305236]
Rps6ka4	chr1	49	47	78.9628	102.871	-23.9082	0.76759	0.0737042	0.711914	NotSig	-0.460657	small	11.9357	12.9527	10.9187	0.446329	-0.706777	0.842969	0.479705	0.999837	Not Sig	nonsignificant	.	.	ribosomal protein S6 kinase A4 [Source:RGD Symbol;Acc:1307277]
Scd2	chr1	2115	1710	102.317	105.226	-2.90873	0.972357	0.0735455	0.711914	NotSig	-0.0528441	negligible	172.448	177.283	167.613	0.190552	-0.527703	0.945455	0.597706	0.999837	Not Sig	nonsignificant	.	.	stearoyl-Coenzyme A desaturase 2 [Source:RGD Symbol;Acc:621177]
Nolc1	chr1	133	119	85.7802	101.797	-16.0172	0.842656	0.0740024	0.711914	NotSig	-0.212556	small	23.8859	25.2741	22.4977	0.323263	-0.358618	0.890148	0.719881	0.999837	Not Sig	nonsignificant	.	Y	nucleolar and coiled-body phosphoprotein 1 [Source:RGD Symbol;Acc:621578]
Nme2	chr10	663	481	84.5215	90.4653	-5.94386	0.934297	0.0740462	0.711914	NotSig	-0.0841212	negligible	146.109	139.595	152.623	0.151136	0.818549	1.09333	0.413044	0.999837	Not Sig	nonsignificant	.	.	NME/NM23 nucleoside diphosphate kinase 2 [Source:RGD Symbol;Acc:619877]
Socs7	chr10	99	62	105.422	85.7488	19.6727	1.22942	0.0738734	0.711914	NotSig	0.256908	small	6.29615	5.46314	7.12917	0.614256	0.89642	1.30496	0.370028	0.999837	Not Sig	nonsignificant	.	Y	suppressor of cytokine signaling 7 [Source:RGD Symbol;Acc:1307720]
Mpp3	chr10	148	119	95.4101	114.924	-19.5135	0.830205	0.0743799	0.711914	NotSig	-0.229618	small	29.8305	30.9153	28.7457	0.292099	-0.41862	0.92982	0.675494	0.999837	Not Sig	nonsignificant	.	.	MAGUK p55 scaffold protein 3 [Source:RGD Symbol;Acc:620015]
Mbnl2	chr15	206	130	115.364	101.085	14.2788	1.14126	0.0737875	0.711914	NotSig	0.176461	negligible	29.1328	26.7356	31.53	0.307113	0.712119	1.17933	0.476391	0.999837	Not Sig	nonsignificant	Y	Y	muscleblind-like splicing regulator 2 [Source:RGD Symbol;Acc:1591755]
H1f2	chr17	268	177	117.416	127.194	-9.77833	0.923123	0.0746346	0.711914	NotSig	-0.15156	negligible	46.8394	44.8692	48.8095	0.260394	0.55984	1.08782	0.575588	0.999837	Not Sig	nonsignificant	.	.	H1.2 linker histone, cluster member [Source:RGD Symbol;Acc:1587893]
Slc12a5	chr3	413	290	104.638	98.0697	6.56875	1.06698	0.0742936	0.711914	NotSig	0.106692	negligible	80.1397	82.5681	77.7112	0.214394	-0.243398	0.941177	0.807697	0.999837	Not Sig	nonsignificant	.	.	solute carrier family 12 member 5 [Source:RGD Symbol;Acc:620811]
Sf3a3	chr5	60	37	110.087	87.0584	23.0287	1.26452	0.0746573	0.711914	NotSig	0.332146	small	12.7495	13.0894	12.4096	0.447224	0.0485758	0.948059	0.961257	0.999837	Not Sig	nonsignificant	.	.	splicing factor 3a, subunit 3 [Source:RGD Symbol;Acc:1308726]
Rere	chr5	112	83	110.376	92.3317	18.0439	1.19543	0.0742686	0.711914	NotSig	0.275001	small	17.6815	18.1424	17.2205	0.359446	-0.339661	0.949183	0.734112	0.999837	Not Sig	nonsignificant	.	Y	arginine-glutamic acid dipeptide repeats [Source:RGD Symbol;Acc:629475]
Rapgef5	chr6	94	77	103.99	78.0332	25.9565	1.33263	0.0747249	0.711914	NotSig	0.290342	small	12.725	14.8613	10.5887	0.44591	-1.04805	0.712503	0.294614	0.999837	Not Sig	nonsignificant	.	Y	Rap guanine nucleotide exchange factor 5 [Source:RGD Symbol;Acc:1561668]
Rap1b	chr7	206	124	87.9289	75.9209	12.008	1.15816	0.0748975	0.712191	NotSig	0.179545	negligible	37.7761	34.2519	41.3004	0.258051	1.01115	1.20578	0.311943	0.999837	Not Sig	nonsignificant	.	Y	RAP1B, member of RAS oncogene family [Source:RGD Symbol;Acc:620577]
Lgals8	chr17	44	41	76.7755	107.946	-31.1702	0.711242	0.0748988	0.712191	NotSig	-0.322476	small	10.1689	10.286	10.0518	0.518754	-0.0278098	0.977235	0.977814	0.999837	Not Sig	nonsignificant	.	Y	galectin 8 [Source:RGD Symbol;Acc:621272]
Ccdc85b	chr1	338	269	79.8648	85.8855	-6.02064	0.929899	0.0752163	0.712882	NotSig	-0.128086	negligible	75.0776	74.087	76.0682	0.192794	0.0979376	1.02674	0.921982	0.999837	Not Sig	nonsignificant	.	.	coiled-coil domain containing 85B [Source:RGD Symbol;Acc:1565319]
Fau	chr1	1034	841	69.2746	65.4151	3.85944	1.059	0.0751395	0.712882	NotSig	0.0901687	negligible	129.974	136.9	123.047	0.185806	-0.994736	0.898806	0.319865	0.999837	Not Sig	nonsignificant	.	.	FAU ubiquitin like and ribosomal protein S30 fusion [Source:RGD Symbol;Acc:61938]
C1ql2	chr13	386	255	79.4626	75.1271	4.33547	1.05771	0.0752616	0.712882	NotSig	0.153039	negligible	11.3117	10.6004	12.0231	0.462839	0.158086	1.13421	0.874389	0.999837	Not Sig	nonsignificant	.	.	complement C1q like 2 [Source:RGD Symbol;Acc:1594583]
Anapc4	chr14	44	42	88.2579	63.4382	24.8197	1.39124	0.0750973	0.712882	NotSig	0.387915	small	7.62088	8.41831	6.82345	0.59631	-0.586377	0.810549	0.557622	0.999837	Not Sig	nonsignificant	.	.	anaphase promoting complex subunit 4 [Source:RGD Symbol;Acc:1306572]
Rasgrp1	chr3	359	251	83.8068	77.5927	6.21414	1.08009	0.0754296	0.7131	NotSig	0.14973	negligible	46.9867	43.4315	50.5418	0.279391	0.72853	1.16371	0.466289	0.999837	Not Sig	nonsignificant	.	Y	RAS guanyl releasing protein 1 [Source:RGD Symbol;Acc:3539]
Snw1	chr6	47	36	71.2023	45.4433	25.7591	1.56684	0.0753717	0.7131	NotSig	0.27424	small	10.629	10.7542	10.5038	0.457042	-0.157135	0.976711	0.875138	0.999837	Not Sig	nonsignificant	.	.	SNW domain containing 1 [Source:RGD Symbol;Acc:1561926]
Hivep2	chr1	137	89	82.2274	65.2219	17.0055	1.26073	0.0755318	0.71338	NotSig	0.224166	small	21.4241	20.1496	22.6986	0.348101	0.564347	1.1265	0.572518	0.999837	Not Sig	nonsignificant	.	Y	HIVEP zinc finger 2 [Source:RGD Symbol;Acc:61988]
Lrrc10b	chr1	251	170	80.995	94.1248	-13.1298	0.860506	0.0757993	0.714842	NotSig	-0.221866	small	30.5183	26.2575	34.7791	0.30651	1.26989	1.32454	0.204123	0.999837	Not Sig	nonsignificant	.	.	leucine rich repeat containing 10B [Source:RGD Symbol;Acc:1564983]
Cs	chr7	338	329	95.5198	104.936	-9.41619	0.910267	0.075975	0.715422	NotSig	-0.135028	negligible	69.7881	80.2897	59.2865	0.206182	-1.99909	0.738407	0.0455991	0.999837	Not Sig	nonsignificant	.	.	citrate synthase [Source:RGD Symbol;Acc:620330]
Atad1	chr1	177	155	89.187	76.0898	13.0972	1.17213	0.0766974	0.718002	NotSig	0.201642	small	36.2961	37.9494	34.6428	0.274432	-0.521468	0.912868	0.602041	0.999837	Not Sig	nonsignificant	.	Y	ATPase family, AAA domain containing 1 [Source:RGD Symbol;Acc:1308570]
Adipor1	chr13	134	126	78.1006	87.8928	-9.79217	0.88859	0.0768792	0.718002	NotSig	-0.238737	small	31.6567	34.708	28.6053	0.27682	-1.00968	0.824172	0.312648	0.999837	Not Sig	nonsignificant	.	Y	adiponectin receptor 1 [Source:RGD Symbol;Acc:1303151]
Igfbp7	chr14	229	171	98.0295	107.673	-9.64395	0.910433	0.0768975	0.718002	NotSig	-0.191806	negligible	57.1356	59.4552	54.816	0.238562	-0.380962	0.921971	0.703231	0.999837	Not Sig	nonsignificant	.	Y	insulin-like growth factor binding protein 7 [Source:RGD Symbol;Acc:1306201]
Ppp3ca	chr2	1345	1036	84.7901	91.9662	-7.17609	0.92197	0.0768749	0.718002	NotSig	-0.0764728	negligible	223.806	212.271	235.341	0.201079	0.596419	1.10868	0.550895	0.999837	Not Sig	nonsignificant	.	Y	protein phosphatase 3 catalytic subunit alpha [Source:RGD Symbol;Acc:3382]
Mpped1	chr7	49	45	86.401	109.533	-23.1325	0.788809	0.0765278	0.718002	NotSig	-0.312841	small	7.63053	9.72941	5.53166	0.581639	-1.2259	0.568551	0.220237	0.999837	Not Sig	nonsignificant	.	.	metallophosphoesterase domain containing 1 [Source:RGD Symbol;Acc:1308244]
Flcn	chr10	43	41	79.2699	58.893	20.3769	1.346	0.077146	0.719639	NotSig	0.406968	small	10.0863	11.9816	8.19099	0.489175	-0.997342	0.683628	0.318598	0.999837	Not Sig	nonsignificant	.	Y	folliculin [Source:RGD Symbol;Acc:735088]
Itpa	chr3	226	165	101.478	112.16	-10.6819	0.904762	0.0773296	0.719986	NotSig	-0.161025	negligible	45.3275	42.8288	47.8262	0.259126	0.41983	1.11668	0.674609	0.999837	Not Sig	nonsignificant	.	.	inosine triphosphatase [Source:RGD Symbol;Acc:1589751]
Naga	chr7	34	34	69.2202	99.2153	-29.9951	0.697677	0.0773245	0.719986	NotSig	-0.425231	small	9.08619	10.3535	7.81893	0.507816	-0.751477	0.7552	0.452366	0.999837	Not Sig	nonsignificant	.	.	alpha-N-acetylgalactosaminidase [Source:RGD Symbol;Acc:1306025]
Penk	chr5	116	56	100.681	80.3863	20.2944	1.25246	0.0776242	0.720001	NotSig	0.320346	small	18.9181	13.6209	24.2152	0.357045	2.12621	1.77781	0.0334859	0.999837	Not Sig	nonsignificant	.	.	proenkephalin [Source:RGD Symbol;Acc:68946]
Abhd17a	chr7	352	249	72.1969	80.4079	-8.21101	0.897883	0.0775973	0.720001	NotSig	-0.12823	negligible	71.1155	66.0913	76.1398	0.23617	0.791623	1.15204	0.42858	0.999837	Not Sig	nonsignificant	.	.	abhydrolase domain containing 17A, depalmitoylase [Source:RGD Symbol;Acc:1359682]
Mmd2	chr12	360	309	94.8689	89.1287	5.74024	1.0644	0.0778045	0.720314	NotSig	0.115653	negligible	67.153	68.2081	66.0978	0.224548	-0.421511	0.969061	0.673382	0.999837	Not Sig	nonsignificant	.	.	monocyte to macrophage differentiation-associated 2 [Source:RGD Symbol;Acc:1306506]
Hdac5	chr10	109	73	86.1162	64.4676	21.6486	1.33581	0.0779483	0.720966	NotSig	0.222835	small	24.0747	21.9837	26.1656	0.322602	0.885988	1.19023	0.375624	0.999837	Not Sig	nonsignificant	.	.	histone deacetylase 5 [Source:RGD Symbol;Acc:619980]
Ncald	chr7	700	570	72.5036	78.8602	-6.35658	0.919394	0.0783354	0.723866	NotSig	-0.107251	negligible	108.047	111.404	104.69	0.176265	-0.551883	0.939728	0.581029	0.999837	Not Sig	nonsignificant	.	Y	neurocalcin delta [Source:RGD Symbol;Acc:1560287]
Lonrf3	chrX	115	40	130.931	99.8347	31.096	1.31147	0.0786695	0.725589	NotSig	0.328634	small	10.6201	6.21967	15.0206	0.526604	2.25382	2.41502	0.0242075	0.999837	Not Sig	nonsignificant	.	.	LON peptidase N-terminal domain and ring finger 3 [Source:RGD Symbol;Acc:1565451]
Rsl1d1	chr10	79	60	94.6956	72.8268	21.8688	1.30028	0.0790305	0.727667	NotSig	0.301716	small	18.0989	17.8957	18.3021	0.364827	0.208643	1.02271	0.834727	0.999837	Not Sig	nonsignificant	.	.	ribosomal L1 domain containing 1 [Source:RGD Symbol;Acc:1359295]
Commd3	chr17	175	137	79.3925	91.5038	-12.1112	0.867642	0.0791044	0.727667	NotSig	-0.226774	small	41.4359	39.0095	43.8624	0.254776	0.434479	1.1244	0.663941	0.999837	Not Sig	nonsignificant	.	.	COMM domain containing 3 [Source:RGD Symbol;Acc:735116]
Psmd4	chr2	185	127	74.456	64.2487	10.2072	1.15887	0.0792162	0.727667	NotSig	0.161356	negligible	41.437	38.4562	44.4178	0.248869	0.797113	1.15502	0.425385	0.999837	Not Sig	nonsignificant	.	.	proteasome 26S subunit ubiquitin receptor, non-ATPase 4 [Source:RGD Symbol;Acc:621109]
Spr	chr4	61	36	86.4146	116.785	-30.3707	0.739944	0.0792647	0.727667	NotSig	-0.413848	small	11.72	11.4155	12.0246	0.441026	0.247246	1.05336	0.804718	0.999837	Not Sig	nonsignificant	.	.	sepiapterin reductase [Source:RGD Symbol;Acc:3753]
Kdelr1	chr1	143	105	74.6386	87.2239	-12.5853	0.855712	0.0803557	0.730182	NotSig	-0.137605	negligible	30.8072	29.8496	31.7648	0.281941	0.256794	1.06416	0.797338	0.999837	Not Sig	nonsignificant	.	Y	KDEL endoplasmic reticulum protein retention receptor 1 [Source:RGD Symbol;Acc:1306764]
Plaat3	chr1	169	115	90.9792	78.9162	12.0629	1.15286	0.080345	0.730182	NotSig	0.249703	small	36.0461	32.5465	39.5456	0.260282	0.934395	1.21505	0.3501	0.999837	Not Sig	nonsignificant	.	.	phospholipase A and acyltransferase 3 [Source:RGD Symbol;Acc:2829]
Gnb2	chr12	556	383	78.9954	86.1703	-7.1749	0.916736	0.0802973	0.730182	NotSig	-0.126833	negligible	127.238	124.256	130.22	0.164135	0.471003	1.048	0.637639	0.999837	Not Sig	nonsignificant	.	.	G protein subunit beta 2 [Source:RGD Symbol;Acc:69319]
Sncg	chr16	188	156	86.4879	76.7246	9.76325	1.12725	0.080186	0.730182	NotSig	0.199063	negligible	42.9782	41.4716	44.4848	0.727123	0.112382	1.07266	0.910521	0.999837	Not Sig	nonsignificant	.	.	synuclein, gamma [Source:RGD Symbol;Acc:70996]
Ppid	chr2	150	119	118.903	103.5	15.4037	1.14883	0.0799874	0.730182	NotSig	0.229006	small	32.525	34.364	30.6859	0.269434	-0.519726	0.892966	0.603255	0.999837	Not Sig	nonsignificant	.	.	peptidylprolyl isomerase D [Source:RGD Symbol;Acc:1303174]
Pabir1	chr1	34	41	61.5507	94.6717	-33.1209	0.650149	0.0809014	0.732581	NotSig	-0.408133	small	8.73939	11.2344	6.24439	0.636045	-1.14451	0.555828	0.252414	0.999837	Not Sig	nonsignificant	.	.	PP2A Aalpha (PPP2R1A) and B55A (PPP2R2A) interacting phosphatase regulator 1 [Source:RGD Symbol;Acc:1310316]
Zswim8	chr15	83	76	101.872	78.3063	23.5658	1.30094	0.080717	0.732581	NotSig	0.271522	small	21.8638	24.4435	19.2842	0.345732	-0.887443	0.78893	0.374841	0.999837	Not Sig	nonsignificant	.	.	zinc finger, SWIM-type containing 8 [Source:RGD Symbol;Acc:1309414]
Gnl2	chr5	34	32	97.3734	65.9579	31.4155	1.4763	0.0809434	0.732581	NotSig	0.407903	small	8.71217	9.7736	7.65073	0.534928	-0.717131	0.782795	0.473294	0.999837	Not Sig	nonsignificant	.	Y	G protein nucleolar 2 [Source:RGD Symbol;Acc:1305006]
Mtm1	chr6	32	31	93.068	59.0732	33.9948	1.57547	0.0807825	0.732581	NotSig	0.405576	small	8.05448	9.27701	6.83194	0.56468	-0.942094	0.736438	0.346144	0.999837	Not Sig	nonsignificant	.	Y	myotubularin 1 [Source:RGD Symbol;Acc:1304582]
Syp	chrX	1890	1493	95.605	100.498	-4.89256	0.951317	0.0809922	0.732581	NotSig	-0.0703842	negligible	325.169	316.665	333.673	0.176494	0.312646	1.05371	0.75455	0.999837	Not Sig	nonsignificant	.	.	synaptophysin [Source:RGD Symbol;Acc:3802]
Gpd1	chr7	251	181	112.133	117.707	-5.57439	0.952642	0.0810739	0.732646	NotSig	-0.130199	negligible	38.4971	35.5765	41.4177	0.354387	0.664701	1.16419	0.506242	0.999837	Not Sig	nonsignificant	.	.	glycerol-3-phosphate dehydrogenase 1 [Source:RGD Symbol;Acc:621381]
Pak6	chr3	99	60	119.814	100.099	19.7153	1.19696	0.0813358	0.73314	NotSig	0.221433	small	13.2581	12.0325	14.4838	0.465419	0.426763	1.20372	0.669552	0.999837	Not Sig	nonsignificant	.	.	p21 (RAC1) activated kinase 6 [Source:RGD Symbol;Acc:1306213]
Syt1	chr7	1004	730	102.881	109.255	-6.37463	0.941654	0.0812207	0.73314	NotSig	-0.085931	negligible	156.081	150.96	161.202	0.177826	0.462071	1.06784	0.64403	0.999837	Not Sig	nonsignificant	Y	Y	synaptotagmin 1 [Source:RGD Symbol;Acc:3803]
Tmem25	chr8	76	84	99.4615	129.191	-29.7296	0.769879	0.0813889	0.73314	NotSig	-0.286928	small	20.681	22.2357	19.1263	0.364657	-0.534803	0.860162	0.592786	0.999837	Not Sig	nonsignificant	.	Y	transmembrane protein 25 [Source:RGD Symbol;Acc:1596132]
Mrpl36	chr1	64	58	72.509	92.7677	-20.2588	0.781618	0.0817527	0.733343	NotSig	-0.310901	small	14.5219	15.5562	13.4876	0.394458	-0.447828	0.867023	0.654277	0.999837	Not Sig	nonsignificant	.	.	mitochondrial ribosomal protein L36 [Source:RGD Symbol;Acc:1306375]
Dek	chr17	71	42	83.1949	109.686	-26.4911	0.758482	0.0817044	0.733343	NotSig	-0.327354	small	13.7372	12.4315	15.0428	0.408706	0.605095	1.21005	0.545116	0.999837	Not Sig	nonsignificant	.	Y	DEK proto-oncogene [Source:RGD Symbol;Acc:1303246]
Srprb	chr8	96	86	81.6894	70.1917	11.4977	1.1638	0.0817901	0.733343	NotSig	0.261235	small	14.3996	16.7342	12.0649	0.440562	-0.97098	0.720973	0.331558	0.999837	Not Sig	nonsignificant	.	.
Pop5	chr12	79	52	110.881	90.6257	20.2557	1.22351	0.0821513	0.733465	NotSig	0.374817	small	14.7088	14.0208	15.3968	0.396716	0.295898	1.09814	0.767308	0.999837	Not Sig	nonsignificant	.	Y	POP5 homolog, ribonuclease P/MRP subunit [Source:RGD Symbol;Acc:1311819]
Mrpl42	chr7	108	64	78.8314	66.0674	12.764	1.1932	0.0819869	0.733465	NotSig	0.277371	small	21.3034	17.7218	24.8849	0.333801	1.40922	1.4042	0.158771	0.999837	Not Sig	nonsignificant	.	.	mitochondrial ribosomal protein L42 [Source:RGD Symbol;Acc:1304915]
Tars1	chr2	45	47	95.5131	78.4011	17.1119	1.21826	0.0822089	0.733465	NotSig	0.293483	small	11.8949	13.711	10.0789	0.463566	-1.03038	0.735099	0.302831	0.999837	Not Sig	nonsignificant	.	Y	threonyl-tRNA synthetase 1 [Source:RGD Symbol;Acc:1359527]
Necap1	chr4	318	255	84.7417	92.2106	-7.46894	0.919001	0.0825571	0.735236	NotSig	-0.12886	negligible	62.2589	64.2306	60.2871	0.208051	-0.47591	0.938604	0.634138	0.999837	Not Sig	nonsignificant	.	.	NECAP endocytosis associated 1 [Source:RGD Symbol;Acc:1306053]
Psmc1	chr6	301	209	69.086	62.4339	6.65218	1.10655	0.0826981	0.735447	NotSig	0.166296	negligible	66.9254	65.426	68.4248	0.219164	0.40666	1.04584	0.684257	0.999837	Not Sig	nonsignificant	.	.	proteasome 26S subunit, ATPase 1 [Source:RGD Symbol;Acc:621097]
Msh2	chr6	21	20	55.5648	87.8795	-32.3147	0.632284	0.0827303	0.735447	NotSig	-0.513149	medium	6.1262	7.14839	5.10401	0.597494	-0.696261	0.714008	0.486265	0.999837	Not Sig	nonsignificant	.	.	mutS homolog 2 [Source:RGD Symbol;Acc:620786]
Pabpc1	chr7	284	195	63.8554	55.9826	7.87286	1.14063	0.0830008	0.73553	NotSig	0.174393	negligible	65.9932	59.545	72.4415	0.254327	1.00297	1.21658	0.315873	0.999837	Not Sig	nonsignificant	.	.	poly(A) binding protein, cytoplasmic 1 [Source:RGD Symbol;Acc:619838]
Snrpd1	chr18	118	89	91.0222	76.6359	14.3863	1.18772	0.0834466	0.736022	NotSig	0.221445	small	21.7526	20.6802	22.825	0.320428	0.442271	1.10372	0.658293	0.999837	Not Sig	nonsignificant	.	Y	small nuclear ribonucleoprotein D1 polypeptide [Source:RGD Symbol;Acc:1306345]
Dstn	chr3	184	73	112.321	104.972	7.34906	1.07001	0.0833512	0.736022	NotSig	0.254592	small	71.5671	47.8716	95.2626	0.221125	4.30248	1.98996	1.68896e-05	0.00281439	FDR<0.05	nonsignificant	.	.	destrin, actin depolymerizing factor [Source:RGD Symbol;Acc:1588366]
Keap1	chr8	67	59	92.8955	74.0213	18.8742	1.25498	0.0834814	0.736022	NotSig	0.258131	small	16.371	17.4974	15.2446	0.392025	-0.337391	0.871254	0.735822	0.999837	Not Sig	nonsignificant	.	.	Kelch-like ECH-associated protein 1 [Source:RGD Symbol;Acc:621619]
Lysmd2	chr8	94	72	85.1107	106.373	-21.2622	0.800117	0.0835833	0.736022	NotSig	-0.316452	small	21.5221	21.0497	21.9945	0.335183	0.246293	1.04489	0.805456	0.999837	Not Sig	nonsignificant	.	Y	LysM domain containing 2 [Source:RGD Symbol;Acc:1304585]
Tia1	chr4	30	30	184.419	131.532	52.8867	1.40208	0.0836184	0.736022	NotSig	0.48034	small	6.66598	7.24355	6.08842	0.657256	-0.208684	0.84053	0.834695	0.999837	Not Sig	nonsignificant	.	Y	TIA1 cytotoxic granule-associated RNA binding protein [Source:RGD Symbol;Acc:1305742]
Atf2	chr3	124	103	86.0411	73.9306	12.1106	1.16381	0.0836992	0.736074	NotSig	0.240933	small	20.4059	21.3849	19.4269	0.353923	-0.575567	0.908438	0.564908	0.999837	Not Sig	nonsignificant	Y	Y	activating transcription factor 2 [Source:RGD Symbol;Acc:621862]
Rpl19	chr10	1213	922	58.8485	62.2702	-3.42171	0.945051	0.0848175	0.73619	NotSig	-0.071659	negligible	273.902	271.991	275.812	0.12905	0.138993	1.01405	0.889456	0.999837	Not Sig	nonsignificant	.	.	ribosomal protein L19 [Source:RGD Symbol;Acc:621183]
Tubg1	chr10	65	38	84.4792	105.591	-21.1123	0.800057	0.0843647	0.73619	NotSig	-0.376536	small	12.5438	9.59017	15.4974	0.443872	1.33532	1.61597	0.18177	0.999837	Not Sig	nonsignificant	.	.	tubulin, gamma 1 [Source:RGD Symbol;Acc:628606]
Sf3a1	chr14	78	68	70.9882	88.8464	-17.8582	0.799	0.0839466	0.73619	NotSig	-0.299071	small	9.60281	10.131	9.07464	0.485341	-0.335784	0.895733	0.737034	0.999837	Not Sig	nonsignificant	.	.	splicing factor 3A subunit 1 [Source:RGD Symbol;Acc:1311477]
Zmiz1	chr16	146	81	98.9763	82.7987	16.1776	1.19538	0.0842085	0.73619	NotSig	0.190907	negligible	12.3107	10.0497	14.5716	0.480925	1.0083	1.44996	0.313312	0.999837	Not Sig	nonsignificant	Y	Y	zinc finger, MIZ-type containing 1 [Source:RGD Symbol;Acc:1311620]
Chst9	chr18	23	33	62.9828	91.9561	-28.9733	0.684923	0.0847116	0.73619	NotSig	-0.490511	small	6.63533	9.18251	4.08815	0.609639	-1.9834	0.445211	0.0473226	0.999837	Not Sig	nonsignificant	Y	.	carbohydrate sulfotransferase 9 [Source:RGD Symbol;Acc:1307302]
Tnpo2	chr19	170	169	105.108	117.125	-12.0173	0.897398	0.0844883	0.73619	NotSig	-0.167851	negligible	26.7109	28.6838	24.738	0.326362	-0.866446	0.862438	0.386245	0.999837	Not Sig	nonsignificant	.	.	transportin 2 [Source:RGD Symbol;Acc:1310356]
Sgtb	chr2	98	79	86.7785	104.188	-17.4096	0.832902	0.0840241	0.73619	NotSig	-0.26648	small	14.6116	13.9257	15.2975	0.389824	0.270067	1.09852	0.787109	0.999837	Not Sig	nonsignificant	.	.	small glutamine rich tetratricopeptide repeat co-chaperone beta [Source:RGD Symbol;Acc:727976]
Ube4b	chr5	88	71	114.396	89.5724	24.8239	1.27714	0.0838197	0.73619	NotSig	0.282144	small	14.7468	17.1065	12.387	0.401946	-1.16528	0.724114	0.243906	0.999837	Not Sig	nonsignificant	.	Y	ubiquitination factor E4B [Source:RGD Symbol;Acc:1304738]
Sptssa	chr6	76	71	104.173	81.4734	22.6991	1.27861	0.0845175	0.73619	NotSig	0.283317	small	18.6721	20.624	16.7201	0.358074	-0.779484	0.81071	0.435694	0.999837	Not Sig	nonsignificant	.	Y	serine palmitoyltransferase, small subunit A [Source:RGD Symbol;Acc:1565821]
Smap1	chr9	139	114	76.4053	90.4824	-14.0772	0.844421	0.0848356	0.73619	NotSig	-0.212351	small	35.8056	37.9414	33.6697	0.267737	-0.46676	0.887415	0.640672	0.999837	Not Sig	nonsignificant	.	.	small ArfGAP 1 [Source:RGD Symbol;Acc:1585595]
Pmm2	chr10	30	25	95.07	138.708	-43.6382	0.685396	0.0846591	0.73619	NotSig	-0.479738	small	6.38341	6.40748	6.35933	0.608059	0.0929223	0.992487	0.925965	0.999837	Not Sig	nonsignificant	.	.	phosphomannomutase 2 [Source:RGD Symbol;Acc:1309366]
Ring1	chr20	52	53	72.2337	85.6615	-13.4278	0.843245	0.0846614	0.73619	NotSig	-0.294977	small	13.0694	13.7445	12.3942	0.460493	-0.366743	0.901762	0.713811	0.999837	Not Sig	nonsignificant	.	.	ring finger protein 1 [Source:RGD Symbol;Acc:3576]
Lrrn2	chr13	315	266	89.8906	77.2676	12.623	1.16337	0.0852755	0.737405	NotSig	0.151799	negligible	33.5628	35.8783	31.2473	0.346425	-0.465888	0.870925	0.641296	0.999837	Not Sig	nonsignificant	.	Y	leucine rich repeat neuronal 2 [Source:RGD Symbol;Acc:1305482]
Rtfdc1	chr3	68	59	90.2871	108.591	-18.3044	0.831438	0.0852547	0.737405	NotSig	-0.309999	small	14.4822	17.5028	11.4616	0.438894	-1.10683	0.654848	0.268367	0.999837	Not Sig	nonsignificant	.	.	replication termination factor 2 domain containing 1 [Source:RGD Symbol;Acc:1311072]
Abce1	chr19	114	95	71.7115	85.817	-14.1055	0.835632	0.0855396	0.738389	NotSig	-0.199418	negligible	21.7427	23.9139	19.5714	0.339927	-0.84715	0.81841	0.396912	0.999837	Not Sig	nonsignificant	Y	.	ATP binding cassette subfamily E member 1 [Source:RGD Symbol;Acc:1305301]
Tnfaip8	chr18	34	25	55.735	82.8542	-27.1191	0.672688	0.085778	0.738502	NotSig	-0.345237	small	6.53475	6.17744	6.89206	0.639691	0.176314	1.11568	0.860048	0.999837	Not Sig	nonsignificant	.	.	TNF alpha induced protein 8 [Source:RGD Symbol;Acc:1305908]
Tbc1d13	chr3	43	41	125.457	101.016	24.4415	1.24196	0.0857379	0.738502	NotSig	0.365643	small	6.01875	7.51288	4.52463	0.657941	-1.01432	0.60225	0.310429	0.999837	Not Sig	nonsignificant	.	.	TBC1 domain family, member 13 [Source:RGD Symbol;Acc:1591937]
Acox1	chr10	114	65	105.738	129.047	-23.3087	0.819377	0.0859293	0.738511	NotSig	-0.35358	small	16.2517	13.3813	19.1222	0.382775	1.0245	1.42903	0.305599	0.999837	Not Sig	nonsignificant	.	.	acyl-CoA oxidase 1 [Source:RGD Symbol;Acc:619757]
Akt3	chr13	149	132	87.713	101.449	-13.7361	0.864601	0.0861871	0.740067	NotSig	-0.225892	small	18.7388	19.6519	17.8257	0.35642	-0.469337	0.907074	0.638829	0.999837	Not Sig	nonsignificant	Y	Y	AKT serine/threonine kinase 3 [Source:RGD Symbol;Acc:62390]
Cplx2	chr17	2126	1609	82.4269	86.6335	-4.20666	0.951443	0.0863826	0.740067	NotSig	-0.0584344	negligible	160.896	155.902	165.889	0.150892	0.505198	1.06406	0.61342	0.999837	Not Sig	nonsignificant	.	Y	complexin 2 [Source:RGD Symbol;Acc:70945]
Adcy3	chr6	74	62	97.5011	79.8097	17.6914	1.22167	0.0863213	0.740067	NotSig	0.30012	small	17.8887	19.4943	16.2832	0.356813	-0.664131	0.835279	0.506606	0.999837	Not Sig	nonsignificant	.	.	adenylate cyclase 3 [Source:RGD Symbol;Acc:71009]
Cbx5	chr7	40	41	92.5394	73.9854	18.554	1.25078	0.0864114	0.740067	NotSig	0.403679	small	9.21728	10.8435	7.59103	0.5066	-1.00642	0.700051	0.314212	0.999837	Not Sig	nonsignificant	.	.	chromobox 5 [Source:RGD Symbol;Acc:1306619]
LOC680039	chr14	109	82	99.5353	95.6163	3.91897	1.04099	0.086601	0.740401	NotSig	0.198452	negligible	17.1383	14.489	19.7877	0.393033	0.968306	1.36571	0.332891	0.999837	Not Sig	nonsignificant	Y	Y	DNA segment, Chr 5, ERATO Doi 579, expressed [Source:MGI Symbol;Acc:MGI:1261849]
Mrpl21	chr1	52	34	72.2121	95.9427	-23.7306	0.752659	0.0865691	0.740401	NotSig	-0.460158	small	11.1164	10.4506	11.7823	0.457596	0.302257	1.12743	0.762456	0.999837	Not Sig	nonsignificant	.	Y	mitochondrial ribosomal protein L21 [Source:RGD Symbol;Acc:1310203]
Cdk2ap2	chr1	47	34	83.7616	113.732	-29.9706	0.736481	0.0884636	0.740713	NotSig	-0.368449	small	11.7477	11.2995	12.1958	0.431121	0.314976	1.07932	0.75278	0.999837	Not Sig	nonsignificant	.	.	cyclin-dependent kinase 2 associated protein 2 [Source:RGD Symbol;Acc:1588883]
Kcnip2	chr1	370	294	99.1979	109.881	-10.6828	0.902778	0.0890048	0.740713	NotSig	-0.117159	negligible	75.2363	78.4541	72.0185	0.196072	-0.525394	0.91797	0.59931	0.999837	Not Sig	nonsignificant	.	Y	potassium voltage-gated channel interacting protein 2 [Source:RGD Symbol;Acc:70887]
Nhp2	chr10	84	74	74.3559	84.7333	-10.3774	0.877529	0.0893484	0.740713	NotSig	-0.213653	small	19.5217	20.7106	18.3329	0.34315	-0.530521	0.885194	0.595751	0.999837	Not Sig	nonsignificant	.	.	NHP2 ribonucleoprotein [Source:RGD Symbol;Acc:1309435]
Ankrd40	chr10	124	101	78.1099	87.9788	-9.86896	0.887826	0.0891699	0.740713	NotSig	-0.215759	small	19.9923	22.5889	17.3956	0.362228	-1.16333	0.770094	0.244697	0.999837	Not Sig	nonsignificant	.	Y	ankyrin repeat domain 40 [Source:RGD Symbol;Acc:1594678]
Cacnb1	chr10	186	131	98.525	76.9689	21.5561	1.28006	0.0881982	0.740713	NotSig	0.165268	negligible	25.9434	22.4969	29.3899	0.384159	0.883655	1.3064	0.376882	0.999837	Not Sig	nonsignificant	.	Y	calcium voltage-gated channel auxiliary subunit beta 1 [Source:RGD Symbol;Acc:68382]
Eif4a2	chr11	1188	850	100.198	95.5378	4.6602	1.04878	0.0888003	0.740713	NotSig	0.0756561	negligible	272.794	265.061	280.526	0.125434	0.744277	1.05835	0.456709	0.999837	Not Sig	nonsignificant	.	.	eukaryotic translation initiation factor 4A2 [Source:RGD Symbol;Acc:1309225]
Sh3bp5	chr16	116	114	86.1663	99.5785	-13.4122	0.86531	0.0892018	0.740713	NotSig	-0.257889	small	27.1794	30.6147	23.744	0.335302	-1.20606	0.775576	0.227795	0.999837	Not Sig	nonsignificant	.	Y
Fam53c	chr18	97	94	107.258	85.1412	22.1172	1.25977	0.0875659	0.740713	NotSig	0.194243	negligible	11.0819	10.8244	11.3394	0.459591	0.0455282	1.04758	0.963686	0.999837	Not Sig	nonsignificant	.	Y	family with sequence similarity 53, member C [Source:RGD Symbol;Acc:1593851]
Mbd1	chr18	42	29	107.543	79.8652	27.6781	1.34656	0.0876507	0.740713	NotSig	0.428526	small	8.12414	7.58979	8.65849	0.540416	0.3305	1.14081	0.741022	0.999837	Not Sig	nonsignificant	.	.	methyl-CpG binding domain protein 1 [Source:RGD Symbol;Acc:1305980]
Tiparp	chr2	142	13	96.7906	145.341	-48.5501	0.665956	0.088335	0.740713	NotSig	-0.370169	small	20.4661	4.93691	35.9952	0.830646	3.56877	7.29105	0.000358657	0.0355984	FDR<0.05	upregulated	.	.	TCDD-inducible poly(ADP-ribose) polymerase [Source:RGD Symbol;Acc:1306171]
Wdr77	chr2	132	82	89.0305	106.217	-17.1863	0.838196	0.0881156	0.740713	NotSig	-0.200052	small	29.0253	27.4744	30.5763	0.301306	0.755263	1.1129	0.450091	0.999837	Not Sig	nonsignificant	.	Y	WD repeat domain 77 [Source:RGD Symbol;Acc:1310479]
Hnrnph3	chr20	55	54	97.3239	73.7151	23.6088	1.32027	0.0879769	0.740713	NotSig	0.278869	small	11.1069	11.5514	10.6623	0.486018	-0.378136	0.923036	0.70533	0.999837	Not Sig	nonsignificant	.	Y	heterogeneous nuclear ribonucleoprotein H3 [Source:RGD Symbol;Acc:1310019]
Nup35	chr3	35	22	98.1143	69.9783	28.136	1.40207	0.0882227	0.740713	NotSig	0.413665	small	6.66794	5.60183	7.73405	0.610018	0.482815	1.38063	0.629227	0.999837	Not Sig	nonsignificant	.	Y	nucleoporin 35 [Source:RGD Symbol;Acc:1303069]
Ahcy	chr3	89	48	80.9575	98.5402	-17.5827	0.821569	0.0872542	0.740713	NotSig	-0.299961	small	16.9971	14.6663	19.3278	0.37573	0.970402	1.31784	0.331846	0.999837	Not Sig	nonsignificant	.	.	adenosylhomocysteinase [Source:RGD Symbol;Acc:69260]
Ogfr	chr3	81	52	83.9438	66.5932	17.3506	1.26055	0.0883987	0.740713	NotSig	0.288224	small	11.2348	10.5172	11.9524	0.454674	0.218032	1.13646	0.827404	0.999837	Not Sig	nonsignificant	.	.	opioid growth factor receptor [Source:RGD Symbol;Acc:69324]
Clec2l	chr4	134	100	90.1978	103.05	-12.8525	0.875279	0.087786	0.740713	NotSig	-0.181037	negligible	26.8887	23.0318	30.7456	0.310845	1.07104	1.33492	0.284151	0.999837	Not Sig	nonsignificant	.	.	C-type lectin domain family 2, member L [Source:RGD Symbol;Acc:1565373]
Copg1	chr4	229	195	92.2633	103.913	-11.65	0.887887	0.0873302	0.740713	NotSig	-0.158269	negligible	49.4033	55.063	43.7437	0.233649	-1.29795	0.79443	0.194303	0.999837	Not Sig	nonsignificant	.	.
Emc3	chr4	214	148	98.4601	87.7306	10.7295	1.1223	0.0879717	0.740713	NotSig	0.202541	small	38.7639	37.7448	39.783	0.274921	0.360619	1.054	0.718384	0.999837	Not Sig	nonsignificant	.	.	ER membrane protein complex subunit 3 [Source:RGD Symbol;Acc:1311566]
Golt1b	chr4	52	48	78.7774	109.851	-31.0737	0.717129	0.0889834	0.740713	NotSig	-0.309333	small	7.6137	8.12993	7.09747	0.565776	-0.48618	0.873005	0.626839	0.999837	Not Sig	nonsignificant	Y	Y	golgi transport 1B [Source:RGD Symbol;Acc:1310691]
Foxo6	chr5	50	51	72.4777	48.2589	24.2188	1.50185	0.088198	0.740713	NotSig	0.322387	small	7.63152	8.40336	6.85968	0.549873	-0.503463	0.816302	0.614639	0.999837	Not Sig	nonsignificant	.	.	forkhead box O6 [Source:RGD Symbol;Acc:1595858]
Akirin1	chr5	238	108	99.2569	87.7051	11.5518	1.13171	0.0884962	0.740713	NotSig	0.219152	small	40.8279	26.3954	55.2603	0.296452	3.32721	2.09355	0.000877189	0.0771809	Not Sig	nonsignificant	Y	Y	akirin 1 [Source:RGD Symbol;Acc:1585989]
Dync2li1	chr6	47	40	97.0782	75.9243	21.1539	1.27862	0.0876856	0.740713	NotSig	0.364281	small	10.0276	11.0077	9.04746	0.496171	-0.500335	0.821922	0.616839	0.999837	Not Sig	nonsignificant	.	.	dynein cytoplasmic 2 light intermediate chain 1 [Source:RGD Symbol;Acc:1310286]
Hcn2	chr7	184	134	90.8067	78.8546	11.9521	1.15157	0.0879206	0.740713	NotSig	0.172634	negligible	32.9283	33.5805	32.2762	0.308261	0.0445859	0.961159	0.964437	0.999837	Not Sig	nonsignificant	.	.	hyperpolarization activated cyclic nucleotide gated potassium and sodium channel 2 [Source:RGD Symbol;Acc:620689]
Mlc1	chr7	479	342	110.177	112.086	-1.90851	0.982973	0.0887689	0.740713	NotSig	-0.0864989	negligible	81.1976	77.8941	84.5011	0.20737	0.615583	1.08482	0.53817	0.999837	Not Sig	nonsignificant	.	.	modulator of VRAC current 1 [Source:RGD Symbol;Acc:1308552]
Pin1	chr8	326	255	86.2124	91.976	-5.76354	0.937336	0.0890258	0.740713	NotSig	-0.143367	negligible	75.8501	77.7495	73.9507	0.203044	-0.185108	0.951141	0.853144	0.999837	Not Sig	nonsignificant	.	.	peptidylprolyl cis/trans isomerase, NIMA-interacting 1 [Source:RGD Symbol;Acc:1310299]
Cryga	chr9	56	39	85.7639	114.742	-28.9784	0.747448	0.087982	0.740713	NotSig	-0.347274	small	12.7681	11.877	13.6592	0.42801	0.316456	1.15006	0.751657	0.999837	Not Sig	nonsignificant	.	.	crystallin, gamma A [Source:RGD Symbol;Acc:1595217]
Armc9	chr9	67	50	76.9194	94.7001	-17.7808	0.812241	0.0886149	0.740713	NotSig	-0.371089	small	14.7822	14.1598	15.4047	0.432377	0.447036	1.08792	0.654849	0.999837	Not Sig	nonsignificant	.	.	armadillo repeat containing 9 [Source:RGD Symbol;Acc:1305615]
Pdia4	chr4	42	41	73.1989	87.5166	-14.3178	0.836399	0.0893497	0.740713	NotSig	-0.403952	small	10.449	10.9664	9.93164	0.477354	-0.328956	0.905646	0.742189	0.999837	Not Sig	nonsignificant	.	.	protein disulfide isomerase family A, member 4 [Source:RGD Symbol;Acc:619835]
Plxna1	chr4	68	63	94.6685	111.647	-16.9787	0.847926	0.087003	0.740713	NotSig	-0.322285	small	7.44912	6.75107	8.14716	0.575004	0.699649	1.2068	0.484146	0.999837	Not Sig	nonsignificant	.	.	plexin A1 [Source:RGD Symbol;Acc:1560871]
Unc80	chr9	144	106	116.868	92.8825	23.986	1.25824	0.0894809	0.741176	NotSig	0.185152	negligible	18.1514	21.0178	15.2851	0.360537	-1.26356	0.727246	0.206388	0.999837	Not Sig	nonsignificant	.	Y	unc-80 homolog, NALCN channel complex subunit [Source:RGD Symbol;Acc:1309976]
Gprin1	chr17	182	179	58.6095	69.8399	-11.2305	0.839197	0.0896502	0.741814	NotSig	-0.20372	small	10.4674	11.0952	9.83956	0.522851	-0.338625	0.886833	0.734892	0.999837	Not Sig	nonsignificant	.	Y	G protein-regulated inducer of neurite outgrowth 1 [Source:RGD Symbol;Acc:1308762]
Enho	chr5	241	161	82.7573	93.1586	-10.4013	0.888349	0.0897088	0.741814	NotSig	-0.207666	small	43.8851	40.5338	47.2364	0.25527	0.804807	1.16536	0.420931	0.999837	Not Sig	nonsignificant	.	.	energy homeostasis associated [Source:RGD Symbol;Acc:6487582]
Saraf	chr16	479	320	80.8955	73.2696	7.62587	1.10408	0.0899401	0.743102	NotSig	0.149679	negligible	104.399	92.189	116.609	0.175841	1.69818	1.26489	0.0894746	0.999837	Not Sig	nonsignificant	.	Y	store-operated calcium entry-associated regulatory factor [Source:RGD Symbol;Acc:1303011]
Eml2	chr1	99	79	83.7746	97.9703	-14.1957	0.855102	0.0911388	0.74462	NotSig	-0.22833	small	22.4008	23.3365	21.465	0.340717	-0.418373	0.919806	0.675675	0.999837	Not Sig	nonsignificant	.	.	EMAP like 2 [Source:RGD Symbol;Acc:621066]
Serpinh1	chr1	58	54	59.1407	47.643	11.4977	1.24133	0.0917991	0.74462	NotSig	0.302234	small	14.3629	18.0608	10.665	0.43224	-1.48489	0.590507	0.137573	0.999837	Not Sig	nonsignificant	.	.	serpin family H member 1 [Source:RGD Symbol;Acc:69302]
Ndufs8	chr1	254	202	68.8464	75.6837	-6.83729	0.90966	0.0916115	0.74462	NotSig	-0.186389	negligible	62.0199	63.6345	60.4052	0.218394	-0.287578	0.949252	0.77367	0.999837	Not Sig	nonsignificant	.	.	NADH:ubiquinone oxidoreductase core subunit S8 [Source:RGD Symbol;Acc:1309436]
Vegfb	chr1	81	64	83.3001	72.056	11.2442	1.15605	0.0921003	0.74462	NotSig	0.146228	negligible	18.1215	19.7349	16.5082	0.367249	-0.66056	0.836497	0.508894	0.999837	Not Sig	nonsignificant	.	.	vascular endothelial growth factor B [Source:RGD Symbol;Acc:619799]
Hint1	chr10	840	571	75.7197	81.1172	-5.39746	0.933461	0.0912017	0.74462	NotSig	-0.119924	negligible	168.725	159.448	178.003	0.167399	0.957897	1.11637	0.338115	0.999837	Not Sig	nonsignificant	.	.
Mdh1	chr14	1456	1093	98.7901	102.871	-4.08096	0.960329	0.090943	0.74462	NotSig	-0.0603036	negligible	271.668	262.269	281.067	0.159027	0.635017	1.07167	0.525418	0.999837	Not Sig	nonsignificant	.	Y	malate dehydrogenase 1 [Source:RGD Symbol;Acc:3072]
Cap2	chr17	259	186	87.6259	97.5061	-9.88016	0.898671	0.0920764	0.74462	NotSig	-0.192037	negligible	50.1291	46.8994	53.3589	0.236209	0.601376	1.13773	0.547589	0.999837	Not Sig	nonsignificant	.	.	cyclase associated actin cytoskeleton regulatory protein 2 [Source:RGD Symbol;Acc:620310]
LOC684988	chr3	594	414	61.1413	56.7066	4.43474	1.07821	0.090503	0.74462	NotSig	0.0168964	negligible	161.931	153.495	170.366	0.155187	1.07585	1.10991	0.281995	0.999837	Not Sig	nonsignificant	.	.
Wasl	chr4	135	122	96.3032	110.06	-13.7573	0.875003	0.0910717	0.74462	NotSig	-0.235981	small	24.0845	25.6288	22.5401	0.380455	-0.702508	0.879483	0.482363	0.999837	Not Sig	nonsignificant	.	.	WASP like actin nucleation promoting factor [Source:RGD Symbol;Acc:735144]
Ece1	chr5	59	48	95.9456	73.7502	22.1954	1.30095	0.0919858	0.74462	NotSig	0.263322	small	7.59762	6.98216	8.21307	0.570624	0.661186	1.17629	0.508493	0.999837	Not Sig	nonsignificant	.	Y	endothelin converting enzyme 1 [Source:RGD Symbol;Acc:620293]
Ddx24	chr6	163	136	97.252	88.8646	8.38748	1.09439	0.0913033	0.74462	NotSig	0.158017	negligible	38.883	40.423	37.343	0.268016	-0.547873	0.923805	0.583779	0.999837	Not Sig	nonsignificant	.	.	DEAD-box helicase 24 [Source:RGD Symbol;Acc:727929]
Bop1	chr7	62	58	97.8073	73.9103	23.8969	1.32332	0.0908063	0.74462	NotSig	0.364748	small	16.3544	18.1292	14.5797	0.40024	-0.559043	0.804208	0.576132	0.999837	Not Sig	nonsignificant	.	.	BOP1 ribosomal biogenesis factor [Source:RGD Symbol;Acc:1310589]
Slc25a38	chr8	44	36	100.6	119.365	-18.7651	0.842792	0.0905429	0.74462	NotSig	-0.421358	small	10.7012	10.8712	10.5312	0.462719	-0.20784	0.96872	0.835354	0.999837	Not Sig	nonsignificant	.	.	solute carrier family 25, member 38 [Source:RGD Symbol;Acc:1311914]
Tspan7	chrX	1906	1299	101.627	105.822	-4.19469	0.960361	0.0902581	0.74462	NotSig	-0.0644943	negligible	408.873	376.457	441.288	0.13129	1.69255	1.17221	0.0905413	0.999837	Not Sig	nonsignificant	Y	.	tetraspanin 7 [Source:RGD Symbol;Acc:1589725]
Pcmt1	chr1	350	254	89.4764	97.9813	-8.50485	0.913199	0.0926473	0.744739	NotSig	-0.142179	negligible	41.4969	41.3034	41.6905	0.255901	-0.118386	1.00937	0.905762	0.999837	Not Sig	nonsignificant	.	Y	protein-L-isoaspartate (D-aspartate) O-methyltransferase 1 [Source:RGD Symbol;Acc:3268]
Rhbdd2	chr12	118	76	80.7114	93.9778	-13.2664	0.858834	0.0925999	0.744739	NotSig	-0.228138	small	21.1898	19.5992	22.7803	0.34198	0.579803	1.1623	0.562048	0.999837	Not Sig	nonsignificant	.	.	rhomboid domain containing 2 [Source:RGD Symbol;Acc:1308231]
Itm2b	chr15	1614	1228	87.1599	90.8192	-3.65933	0.959708	0.0927795	0.744739	NotSig	-0.0836	negligible	364.751	368.598	360.903	0.120958	-0.204654	0.979123	0.837842	0.999837	Not Sig	nonsignificant	Y	.	integral membrane protein 2B [Source:RGD Symbol;Acc:620727]
Ciao2b	chr19	79	57	69.6392	95.4218	-25.7826	0.729804	0.0928651	0.744739	NotSig	-0.344079	small	17.2946	16.9229	17.6662	0.361066	0.233268	1.04392	0.815553	0.999837	Not Sig	nonsignificant	.	Y	cytosolic iron-sulfur assembly component 2B [Source:RGD Symbol;Acc:1585802]
Tac3	chr7	53	32	96.3063	117.922	-21.616	0.816693	0.0924398	0.744739	NotSig	-0.232271	small	11.3849	9.47926	13.2906	0.461606	1.00449	1.40207	0.31514	0.999837	Not Sig	nonsignificant	.	.	tachykinin precursor 3 [Source:RGD Symbol;Acc:3809]
Rab8a	chr16	63	50	73.5747	98.0982	-24.5235	0.750011	0.0925117	0.744739	NotSig	-0.394777	small	13.8965	13.8167	13.9762	0.422218	-0.0696609	1.01154	0.944464	0.999837	Not Sig	nonsignificant	.	.	RAB8A, member RAS oncogene family [Source:RGD Symbol;Acc:621144]
Tomm70	chr11	78	81	86.375	97.2935	-10.9185	0.887777	0.0933494	0.746188	NotSig	-0.25157	small	17.5188	19.665	15.3726	0.395161	-0.922676	0.781723	0.356176	0.999837	Not Sig	nonsignificant	.	.	translocase of outer mitochondrial membrane 70 [Source:RGD Symbol;Acc:1303049]
Nap1l5	chr4	234	149	117.899	102.295	15.6048	1.15255	0.0933263	0.746188	NotSig	0.145596	negligible	50.5414	50.4743	50.6085	0.246595	0.199215	1.00266	0.842094	0.999837	Not Sig	nonsignificant	.	Y	nucleosome assembly protein 1-like 5 [Source:RGD Symbol;Acc:1584123]
Sh3glb1	chr2	93	62	80.5331	99.4003	-18.8672	0.81019	0.0932651	0.746188	NotSig	-0.218863	small	12.4767	12.5876	12.3659	0.453045	-0.0337048	0.982392	0.973113	0.999837	Not Sig	nonsignificant	Y	Y	SH3 domain -containing GRB2-like endophilin B1 [Source:RGD Symbol;Acc:1304859]
Smarca5	chr19	136	79	106.65	81.2103	25.4397	1.31326	0.0935235	0.746972	NotSig	0.206928	small	23.8287	19.7152	27.9423	0.331798	1.26955	1.4173	0.204246	0.999837	Not Sig	nonsignificant	Y	Y	SWI/SNF related, matrix associated, actin dependent regulator of chromatin, subfamily a, member 5 [Source:RGD Symbol;Acc:1308832]
Pdxp	chr7	292	230	86.4427	97.1623	-10.7196	0.889673	0.093603	0.747001	NotSig	-0.150824	negligible	59.0449	58.9278	59.1621	0.21701	0.0573575	1.00398	0.95426	0.999837	Not Sig	nonsignificant	.	.	pyridoxal phosphatase [Source:RGD Symbol;Acc:1586212]
Fxyd7	chr1	325	298	106.894	115.273	-8.37952	0.927307	0.0942264	0.747655	NotSig	-0.148798	negligible	79.1102	81.5177	76.7028	0.212711	-0.564148	0.940934	0.572653	0.999837	Not Sig	nonsignificant	.	.	FXYD domain-containing ion transport regulator 7 [Source:RGD Symbol;Acc:620830]
Thrsp	chr1	105	79	102.187	83.0643	19.1225	1.23021	0.0941872	0.747655	NotSig	0.232175	small	23.2493	21.7096	24.7891	0.391334	0.334429	1.14185	0.738056	0.999837	Not Sig	nonsignificant	.	.	thyroid hormone responsive [Source:RGD Symbol;Acc:3859]
Sorbs3	chr15	36	39	88.458	109.282	-20.8245	0.809444	0.0937984	0.747655	NotSig	-0.353444	small	8.26958	9.06645	7.4727	0.520984	-0.673937	0.824215	0.500351	0.999837	Not Sig	nonsignificant	.	.	sorbin and SH3 domain containing 3 [Source:RGD Symbol;Acc:628900]
Ocel1	chr16	48	47	95.0678	72.8089	22.259	1.30572	0.0939524	0.747655	NotSig	0.301666	small	12.9282	13.1456	12.7109	0.429983	-0.0894259	0.966934	0.928743	0.999837	Not Sig	nonsignificant	.	.	occludin/ELL domain containing 1 [Source:RGD Symbol;Acc:1565407]
Wnk2	chr17	105	78	89.3485	102.88	-13.5319	0.868469	0.0939631	0.747655	NotSig	-0.302928	small	21.8992	21.3111	22.4874	0.356711	0.066493	1.0552	0.946985	0.999837	Not Sig	nonsignificant	.	Y	WNK lysine deficient protein kinase 2 [Source:RGD Symbol;Acc:1307284]
S100b	chr20	1788	1341	115.467	117.67	-2.20342	0.981275	0.0944106	0.747655	NotSig	-0.0582405	negligible	343.437	332.642	354.231	0.183747	0.451235	1.0649	0.65182	0.999837	Not Sig	nonsignificant	.	.	S100 calcium binding protein B [Source:RGD Symbol;Acc:3615]
Dnajb5	chr5	363	104	115.42	105.215	10.2056	1.097	0.0941617	0.747655	NotSig	0.174901	negligible	47.163	27.3177	67.0084	0.336561	3.87542	2.45293	0.000106439	0.0132527	FDR<0.05	upregulated	.	Y	DnaJ heat shock protein family (Hsp40) member B5 [Source:RGD Symbol;Acc:1307453]
Cnpy2	chr7	149	111	69.6953	58.3328	11.3625	1.19479	0.0944454	0.747655	NotSig	0.242048	small	32.321	30.4106	34.2314	0.276627	0.381746	1.12564	0.70265	0.999837	Not Sig	nonsignificant	.	.	canopy FGF signaling regulator 2 [Source:RGD Symbol;Acc:1589072]
Clk1	chr9	64	22	198.962	183.529	15.433	1.08409	0.094355	0.747655	NotSig	0.2613	small	9.05223	6.72169	11.3828	0.588705	1.33028	1.69344	0.183425	0.999837	Not Sig	nonsignificant	.	.	CDC-like kinase 1 [Source:RGD Symbol;Acc:1311469]
Tnrc18	chr12	57	39	90.1588	117.269	-27.1105	0.768819	0.0946988	0.747854	NotSig	-0.366888	small	8.68589	6.86197	10.5098	0.537824	0.935781	1.5316	0.349386	0.999837	Not Sig	nonsignificant	Y	Y	trinucleotide repeat containing 18 [Source:RGD Symbol;Acc:1307540]
Park7	chr5	514	418	79.3275	85.6123	-6.28488	0.926589	0.0945736	0.747854	NotSig	-0.143442	negligible	121.115	122.413	119.818	0.192066	-0.185827	0.978796	0.852581	0.999837	Not Sig	nonsignificant	.	.	Parkinsonism associated deglycase [Source:RGD Symbol;Acc:621808]
Cpne5	chr20	79	52	114.7	96.489	18.2109	1.18874	0.0948966	0.748652	NotSig	0.29998	small	14.7756	14.798	14.7532	0.430071	0.074814	0.996975	0.940363	0.999837	Not Sig	nonsignificant	.	.	copine 5 [Source:RGD Symbol;Acc:1308021]
RGD1311703	chr1	194	172	82.711	97.8659	-15.155	0.845146	0.0951138	0.748863	NotSig	-0.141988	negligible	45.1988	44.9848	45.4128	0.251605	-0.212802	1.00951	0.831481	0.999837	Not Sig	nonsignificant	.	Y
Neurod1	chr3	47	35	76.8903	47.1696	29.7207	1.63008	0.0951311	0.748863	NotSig	0.41302	small	9.87336	9.41016	10.3366	0.497449	0.250693	1.09845	0.802052	0.999837	Not Sig	nonsignificant	.	Y	neuronal differentiation 1 [Source:RGD Symbol;Acc:3165]
Prickle1	chr7	222	95	95.2185	80.5995	14.619	1.18138	0.095298	0.748977	NotSig	0.1787	negligible	26.8561	20.5565	33.1556	0.391534	1.65226	1.6129	0.0984821	0.999837	Not Sig	nonsignificant	.	.	prickle planar cell polarity protein 1 [Source:RGD Symbol;Acc:735090]
Ccdc28a	chr1	35	29	93.6783	70.2893	23.389	1.33275	0.0957231	0.749085	NotSig	0.438531	small	8.44696	8.83708	8.05685	0.51054	-0.273607	0.911709	0.784386	0.999837	Not Sig	nonsignificant	.	Y	coiled-coil domain containing 28A [Source:RGD Symbol;Acc:1310326]
Adap1	chr12	169	162	103.878	91.831	12.0472	1.13119	0.0959212	0.749085	NotSig	0.16395	negligible	37.979	41.6955	34.2624	0.30175	-0.779372	0.821731	0.43576	0.999837	Not Sig	nonsignificant	.	.	ArfGAP with dual PH domains 1 [Source:RGD Symbol;Acc:621418]
Naxd	chr16	63	54	119.91	93.4688	26.4412	1.28289	0.09592	0.749085	NotSig	0.312797	small	12.1021	12.6482	11.5561	0.441517	-0.377723	0.913657	0.705637	0.999837	Not Sig	nonsignificant	.	.	NAD(P)HX dehydratase [Source:RGD Symbol;Acc:1562691]
Mrps36	chr2	143	99	85.9889	99.998	-14.0092	0.859905	0.0957065	0.749085	NotSig	-0.24107	small	27.5551	26.4031	28.707	0.287057	0.394022	1.08726	0.693565	0.999837	Not Sig	nonsignificant	.	.	mitochondrial ribosomal protein S36 [Source:RGD Symbol;Acc:1309315]
Yipf4	chr6	118	111	81.23	95.2368	-14.0068	0.852926	0.0955921	0.749085	NotSig	-0.259691	small	29.4303	31.5867	27.274	0.293608	-0.560208	0.863463	0.575337	0.999837	Not Sig	nonsignificant	.	Y	Yip1 domain family, member 4 [Source:RGD Symbol;Acc:1310157]
Dtnb	chr6	73	48	99.2294	77.9184	21.3111	1.27351	0.0956398	0.749085	NotSig	0.226823	small	16.0266	14.2986	17.7546	0.410992	0.738099	1.2417	0.460455	0.999837	Not Sig	nonsignificant	.	.	dystrobrevin, beta [Source:RGD Symbol;Acc:1309579]
Ngef	chr9	128	104	81.8801	100.045	-18.1651	0.818431	0.0955069	0.749085	NotSig	-0.170513	negligible	28.7256	30.3836	27.0676	0.291909	-0.504783	0.890863	0.613711	0.999837	Not Sig	nonsignificant	.	.	neuronal guanine nucleotide exchange factor [Source:RGD Symbol;Acc:1309055]
Dpcd	chr1	171	128	74.3133	82.1192	-7.8059	0.904944	0.0962082	0.74954	NotSig	-0.0943803	negligible	32.3585	33.8412	30.8757	0.276876	-0.443657	0.912369	0.657291	0.999837	Not Sig	nonsignificant	.	.	deleted in primary ciliary dyskinesia [Source:RGD Symbol;Acc:1307648]
H2ax	chr8	102	64	111.753	92.319	19.4343	1.21051	0.0961294	0.74954	NotSig	0.273042	small	16.8231	14.3592	19.2869	0.392018	1.02815	1.34317	0.303881	0.999837	Not Sig	nonsignificant	.	.	H2A.X variant histone [Source:RGD Symbol;Acc:1566119]
Bccip	chr1	71	38	47.0894	68.7234	-21.634	0.685202	0.0963109	0.749703	NotSig	-0.271709	small	13.8605	10.1103	17.6107	0.420804	1.54537	1.74185	0.122258	0.999837	Not Sig	nonsignificant	.	Y	BRCA2 and CDKN1A interacting protein [Source:RGD Symbol;Acc:1307362]
Rmnd5b	chr10	30	49	93.2828	73.4928	19.7901	1.26928	0.0965342	0.749703	NotSig	0.353818	small	12.7697	18.5905	6.94892	0.457875	-2.88376	0.37379	0.00392958	0.25176	Not Sig	nonsignificant	.	.	required for meiotic nuclear division 5 homolog B [Source:RGD Symbol;Acc:1559511]
R3hdm4	chr7	440	339	101.109	107.922	-6.81312	0.93687	0.0966376	0.749914	NotSig	-0.138689	negligible	91.1493	88.0115	94.2871	0.200707	0.286336	1.0713	0.774621	0.999837	Not Sig	nonsignificant	.	.	R3H domain containing 4 [Source:RGD Symbol;Acc:1307067]
Nrxn2	chr1	486	357	70.9216	64.0607	6.86083	1.1071	0.0984912	0.750032	NotSig	0.111617	negligible	77.2856	74.5404	80.0307	0.236447	0.325155	1.07365	0.745064	0.999837	Not Sig	nonsignificant	Y	Y	neurexin 2 [Source:RGD Symbol;Acc:620211]
Fbxw11	chr10	141	96	91.5119	76.9382	14.5737	1.18942	0.0989007	0.750032	NotSig	0.201626	small	19.1856	21.4372	16.9339	0.378911	-0.614222	0.789928	0.539069	0.999837	Not Sig	nonsignificant	.	.	F-box and WD repeat domain containing 11 [Source:RGD Symbol;Acc:1309121]
Hs3st1	chr14	42	26	110.027	75.6252	34.4018	1.4549	0.0982543	0.750032	NotSig	0.41393	small	6.02627	3.97893	8.07361	0.668022	1.38832	2.02909	0.165038	0.999837	Not Sig	nonsignificant	.	Y	heparan sulfate-glucosamine 3-sulfotransferase 1 [Source:RGD Symbol;Acc:71084]
LOC102550180	chr15	89	113	70.8339	81.3377	-10.5038	0.870862	0.0987122	0.750032	NotSig	-0.269482	small	23.6034	29.0774	18.1293	0.332463	-2.09941	0.623484	0.0357807	0.999837	Not Sig	nonsignificant	.	.
Tusc3	chr16	534	383	82.2557	91.3754	-9.11966	0.900196	0.0990176	0.750032	NotSig	-0.136872	negligible	125	121.247	128.753	0.158026	0.566743	1.06191	0.570889	0.999837	Not Sig	nonsignificant	Y	Y	tumor suppressor candidate 3 [Source:RGD Symbol;Acc:1303318]
Gnpda1	chr18	32	33	71.1796	102.245	-31.0651	0.696169	0.0982508	0.750032	NotSig	-0.370851	small	7.40178	8.58269	6.22086	0.587447	-0.710418	0.724815	0.477445	0.999837	Not Sig	nonsignificant	.	Y	glucosamine-6-phosphate deaminase 1 [Source:RGD Symbol;Acc:1585624]
Tcf25	chr19	599	465	94.1445	100.828	-6.68393	0.93371	0.0969251	0.750032	NotSig	-0.071276	negligible	129.155	130.286	128.024	0.166181	-0.173619	0.982637	0.862165	0.999837	Not Sig	nonsignificant	.	.	transcription factor 25 [Source:RGD Symbol;Acc:1309054]
LOC100911992	chr2	512	393	83.0964	76.5222	6.57421	1.08591	0.0981303	0.750032	NotSig	0.144691	negligible	125.113	128.136	122.09	0.177778	-0.291117	0.952817	0.770962	0.999837	Not Sig	nonsignificant	.	.
Plekha3	chr3	60	40	80.3155	105.034	-24.7189	0.764659	0.0989347	0.750032	NotSig	-0.295607	small	11.5374	11.8396	11.2351	0.463603	-0.181485	0.948941	0.855987	0.999837	Not Sig	nonsignificant	.	.	pleckstrin homology domain containing A3 [Source:RGD Symbol;Acc:1305244]
Pcna	chr3	127	66	118.284	98.11	20.1744	1.20563	0.0983164	0.750032	NotSig	0.231764	small	27.7728	25.3008	30.2449	0.336066	1.13644	1.19541	0.255773	0.999837	Not Sig	nonsignificant	.	.	proliferating cell nuclear antigen [Source:RGD Symbol;Acc:3269]
Arf5	chr4	660	429	90.0909	97.094	-7.00314	0.927873	0.0986622	0.750032	NotSig	-0.120137	negligible	138.72	124.488	152.952	0.168743	1.57702	1.22864	0.114792	0.999837	Not Sig	nonsignificant	.	.	ADP-ribosylation factor 5 [Source:RGD Symbol;Acc:621278]
Pnrc1	chr5	164	106	45.1611	58.7168	-13.5557	0.769135	0.0988671	0.750032	NotSig	-0.196508	negligible	34.1552	26.8547	41.4557	0.307514	1.81706	1.5437	0.0692076	0.999837	Not Sig	nonsignificant	.	Y	proline-rich nuclear receptor coactivator 1 [Source:RGD Symbol;Acc:628753]
Trim32	chr5	81	85	89.9146	73.0463	16.8683	1.23093	0.0984234	0.750032	NotSig	0.140014	negligible	13.618	14.5021	12.734	0.437125	-0.621062	0.878082	0.534559	0.999837	Not Sig	nonsignificant	.	Y	tripartite motif-containing 32 [Source:RGD Symbol;Acc:1305238]
Akr7a2	chr5	59	60	74.9917	86.6179	-11.6262	0.865776	0.0988616	0.750032	NotSig	-0.323967	small	18.1108	21.3188	14.9029	0.38687	-1.06586	0.699052	0.286488	0.999837	Not Sig	nonsignificant	.	.	aldo-keto reductase family 7, member A2 [Source:RGD Symbol;Acc:620311]
Dld	chr6	164	175	105.062	91.711	13.351	1.14558	0.0971104	0.750032	NotSig	0.157089	negligible	43.1412	48.1707	38.1118	0.247742	-1.49509	0.791182	0.134891	0.999837	Not Sig	nonsignificant	.	.	dihydrolipoamide dehydrogenase [Source:RGD Symbol;Acc:735073]
Pwwp3a	chr7	31	27	85.9485	116.53	-30.5817	0.737564	0.0968349	0.750032	NotSig	-0.42054	small	7.34897	6.96402	7.73392	0.552916	0.234244	1.11055	0.814796	0.999837	Not Sig	nonsignificant	.	.	PWWP domain containing 3A, DNA repair factor [Source:RGD Symbol;Acc:1308340]
Atg101	chr7	91	73	93.0032	79.6638	13.3394	1.16745	0.0980324	0.750032	NotSig	0.299471	small	17.6718	16.3197	19.0239	0.397516	0.387363	1.1657	0.698487	0.999837	Not Sig	nonsignificant	.	.	autophagy related 101 [Source:RGD Symbol;Acc:1359310]
Fdx2	chr8	154	123	67.3288	79.5451	-12.2163	0.846423	0.0986267	0.750032	NotSig	-0.154569	negligible	35.5353	35.8278	35.2427	0.261145	-0.0254774	0.983668	0.979674	0.999837	Not Sig	nonsignificant	.	.	ferredoxin 2 [Source:RGD Symbol;Acc:1561264]
Mllt1	chr9	114	59	93.3787	109.211	-15.8324	0.855029	0.0978133	0.750032	NotSig	-0.219389	small	16.3127	14.4248	18.2006	0.404757	1.17791	1.26176	0.238832	0.999837	Not Sig	nonsignificant	.	.	MLLT1, super elongation complex subunit [Source:RGD Symbol;Acc:1588581]
Hsp90ab1	chr9	2315	1609	86.6331	83.8878	2.74522	1.03272	0.0984533	0.750032	NotSig	0.0586931	negligible	489.947	466.346	513.548	0.135673	1.00026	1.10122	0.317185	0.999837	Not Sig	nonsignificant	.	.	heat shock protein 90 alpha family class B member 1 [Source:RGD Symbol;Acc:1303075]
Dtx1	chr12	45	43	107.364	76.7688	30.5955	1.39854	0.0983419	0.750032	NotSig	0.286878	small	8.09092	8.5991	7.58274	0.530782	-0.232477	0.881806	0.816168	0.999837	Not Sig	nonsignificant	.	.	deltex E3 ubiquitin ligase 1 [Source:RGD Symbol;Acc:1585380]
Bod1	chr10	79	52	85.624	68.7999	16.8241	1.24454	0.0996405	0.750127	NotSig	0.284301	small	16.9075	17.1226	16.6923	0.373236	0.102958	0.974865	0.917996	0.999837	Not Sig	nonsignificant	.	.	biorientation of chromosomes in cell division 1 [Source:RGD Symbol;Acc:1305622]
Zcchc14	chr19	53	73	89.9709	72.1712	17.7998	1.24663	0.0993126	0.750127	NotSig	0.306393	small	7.6074	8.93993	6.27486	0.592629	-0.836221	0.701892	0.403031	0.999837	Not Sig	nonsignificant	.	Y	zinc finger CCHC-type containing 14 [Source:RGD Symbol;Acc:1309494]
Rab11fip5	chr4	112	86	75.4961	85.6	-10.1038	0.881964	0.0994055	0.750127	NotSig	-0.246506	small	15.3599	15.1944	15.5254	0.422573	0.280324	1.02179	0.779229	0.999837	Not Sig	nonsignificant	.	.	RAB11 family interacting protein 5 [Source:RGD Symbol;Acc:1592069]
Brpf1	chr4	30	38	102.634	64.9354	37.6988	1.58056	0.0991483	0.750127	NotSig	0.349975	small	8.86075	10.9056	6.81587	0.509181	-1.30348	0.624987	0.192409	0.999837	Not Sig	nonsignificant	.	Y	bromodomain and PHD finger containing, 1 [Source:RGD Symbol;Acc:1584828]
Insyn1	chr8	196	149	71.6418	79.8141	-8.17228	0.897609	0.0995098	0.750127	NotSig	-0.163472	negligible	35.9577	38.0879	33.8275	0.274397	-0.47826	0.888143	0.632465	0.999837	Not Sig	nonsignificant	.	.	inhibitory synaptic factor 1 [Source:RGD Symbol;Acc:1562618]
Uchl5	chr13	51	32	74.381	101.759	-27.3775	0.730956	0.0996051	0.750127	NotSig	-0.410004	small	10.019	8.73583	11.3021	0.494223	0.577818	1.29377	0.563387	0.999837	Not Sig	nonsignificant	.	.	ubiquitin C-terminal hydrolase L5 [Source:RGD Symbol;Acc:1305414]
Hey1	chr2	54	44	69.7098	85.9669	-16.257	0.810892	0.100402	0.754125	NotSig	-0.452195	small	9.9301	11.052	8.80819	0.479767	-0.642092	0.796976	0.520813	0.999837	Not Sig	nonsignificant	.	.	hes-related family bHLH transcription factor with YRPW motif 1 [Source:RGD Symbol;Acc:621403]
Lipa	chr1	58	37	103.918	78.1503	25.7673	1.32971	0.100791	0.756472	NotSig	0.248965	small	10.2392	9.40064	11.0778	0.481401	0.410137	1.17841	0.681706	0.999837	Not Sig	nonsignificant	.	Y	lipase A, lysosomal acid type [Source:RGD Symbol;Acc:3008]
Stard3	chr10	83	53	77.0527	103.195	-26.1427	0.746668	0.101477	0.758726	NotSig	-0.248262	small	17.8603	15.7917	19.9288	0.38201	0.815274	1.26198	0.414915	0.999837	Not Sig	nonsignificant	Y	Y	StAR-related lipid transfer domain containing 3 [Source:RGD Symbol;Acc:1549768]
RGD1311946	chr1	43	34	56.8551	85.1102	-28.2551	0.668017	0.102853	0.760945	NotSig	-0.333321	small	7.89476	7.57497	8.21456	0.572977	0.284286	1.08443	0.776191	0.999837	Not Sig	nonsignificant	.	.	similar to RIKEN cDNA 1810055G02 [Source:RGD Symbol;Acc:1311946]
RGD1565784	chr10	55	43	86.748	99.3905	-12.6425	0.8728	0.102587	0.760945	NotSig	-0.284207	small	9.51106	8.53081	10.4913	0.498998	0.457713	1.22981	0.647159	0.999837	Not Sig	nonsignificant	.	.
Mapk9	chr10	167	160	95.4147	110.621	-15.2063	0.862537	0.103839	0.760945	NotSig	-0.176081	negligible	25.2137	27.6668	22.7605	0.350376	-0.810712	0.822666	0.417531	0.999837	Not Sig	nonsignificant	.	Y	mitogen-activated protein kinase 9 [Source:RGD Symbol;Acc:628847]
Cltc	chr10	638	445	105.998	98.7101	7.28836	1.07384	0.102336	0.760945	NotSig	0.10814	negligible	129.916	121.601	138.232	0.198432	0.76999	1.13677	0.441306	0.999837	Not Sig	nonsignificant	.	.	clathrin heavy chain [Source:RGD Symbol;Acc:2364]
Nmt1	chr10	257	225	86.7583	97.0883	-10.33	0.893602	0.102711	0.760945	NotSig	-0.150952	negligible	41.5574	40.7333	42.3815	0.264438	0.189867	1.04046	0.849413	0.999837	Not Sig	nonsignificant	Y	.	N-myristoyltransferase 1 [Source:RGD Symbol;Acc:628642]
Mapk10	chr14	250	191	109.166	93.0001	16.1656	1.17382	0.104085	0.760945	NotSig	0.164415	negligible	31.4228	32.55	30.2956	0.284587	-0.147897	0.93074	0.882424	0.999837	Not Sig	nonsignificant	.	Y	mitogen activated protein kinase 10 [Source:RGD Symbol;Acc:3663]
Mrpl1	chr14	37	31	73.6589	110.486	-36.8267	0.666683	0.102751	0.760945	NotSig	-0.392041	small	7.43771	7.42197	7.45345	0.55446	-0.195374	1.00424	0.8451	0.999837	Not Sig	nonsignificant	.	.	mitochondrial ribosomal protein L1 [Source:RGD Symbol;Acc:1306850]
Gas2l1	chr14	98	70	81.6564	68.2492	13.4072	1.19644	0.103517	0.760945	NotSig	0.247911	small	6.13265	5.68562	6.57969	0.609342	0.505329	1.15725	0.613328	0.999837	Not Sig	nonsignificant	.	.	growth arrest-specific 2 like 1 [Source:RGD Symbol;Acc:1311206]
Gjb6	chr15	77	96	87.4602	99.2027	-11.7425	0.881631	0.103182	0.760945	NotSig	-0.178089	negligible	18.9228	22.8039	15.0416	0.35882	-1.66209	0.659608	0.096495	0.999837	Not Sig	nonsignificant	.	.	gap junction protein, beta 6 [Source:RGD Symbol;Acc:621830]
Ndfip2	chr15	224	182	80.5125	93.1133	-12.6008	0.864673	0.104302	0.760945	NotSig	-0.186293	negligible	52.4445	55.1612	49.7277	0.223325	-0.63794	0.901499	0.523513	0.999837	Not Sig	nonsignificant	.	.	Nedd4 family interacting protein 2 [Source:RGD Symbol;Acc:1309716]
Uqcc2	chr20	180	181	68.6215	75.1614	-6.53991	0.912988	0.104144	0.760945	NotSig	-0.238282	small	44.8478	48.7958	40.8998	0.244385	-1.01466	0.838182	0.310268	0.999837	Not Sig	nonsignificant	.	.	ubiquinol-cytochrome c reductase complex assembly factor 2 [Source:RGD Symbol;Acc:1306917]
Phactr3	chr3	234	205	97.1847	89.9076	7.27712	1.08094	0.102261	0.760945	NotSig	0.176761	negligible	57.4138	60.1849	54.6426	0.212067	-0.752119	0.907913	0.45198	0.999837	Not Sig	nonsignificant	.	.	phosphatase and actin regulator 3 [Source:RGD Symbol;Acc:1303029]
Tmem106b	chr4	197	179	83.6784	93.3939	-9.71548	0.895973	0.103625	0.760945	NotSig	-0.153955	negligible	41.0268	43.6107	38.4429	0.252833	-0.760166	0.881502	0.447155	0.999837	Not Sig	nonsignificant	.	.	transmembrane protein 106B [Source:RGD Symbol;Acc:1303037]
MGC94199	chr5	52	51	89.3365	103.158	-13.8212	0.866019	0.103944	0.760945	NotSig	-0.371217	small	13.3416	15.01	11.6732	0.438254	-0.773209	0.777692	0.439399	0.999837	Not Sig	nonsignificant	.	Y
Fbxo10	chr5	93	58	95.6391	78.8071	16.832	1.21358	0.103954	0.760945	NotSig	0.294229	small	14.7068	13.1264	16.2872	0.460265	1.01031	1.2408	0.312346	0.999837	Not Sig	nonsignificant	.	Y	F-box protein 10 [Source:RGD Symbol;Acc:1305465]
Hpca	chr5	3273	2397	96.3965	99.0137	-2.61723	0.973567	0.104328	0.760945	NotSig	-0.0466143	negligible	659.2	621.802	696.597	0.125855	1.23444	1.12029	0.217038	0.999837	Not Sig	nonsignificant	.	.	hippocalcin [Source:RGD Symbol;Acc:620060]
Capzb	chr5	452	340	76.595	84.7285	-8.13348	0.904005	0.102266	0.760945	NotSig	-0.125865	negligible	99.0781	95.9425	102.214	0.183358	0.552448	1.06536	0.580642	0.999837	Not Sig	nonsignificant	.	Y	capping actin protein of muscle Z-line subunit beta [Source:RGD Symbol;Acc:1359099]
Gabrd	chr5	53	52	86.9082	103.956	-17.0479	0.836008	0.103522	0.760945	NotSig	-0.327328	small	12.7298	13.5658	11.8939	0.475925	-0.513732	0.876757	0.607439	0.999837	Not Sig	nonsignificant	.	.	gamma-aminobutyric acid type A receptor subunit delta [Source:RGD Symbol;Acc:61901]
Snx13	chr6	62	43	101.708	127.036	-25.3272	0.800629	0.10396	0.760945	NotSig	-0.342574	small	8.08205	8.00273	8.16137	0.567575	0.0683072	1.01982	0.945541	0.999837	Not Sig	nonsignificant	.	.	sorting nexin 13 [Source:RGD Symbol;Acc:1309778]
Dlst	chr6	149	117	106.721	93.523	13.1984	1.14112	0.103486	0.760945	NotSig	0.166883	negligible	24.6457	23.6568	25.6347	0.305029	0.268681	1.08361	0.788175	0.999837	Not Sig	nonsignificant	.	.	dihydrolipoamide S-succinyltransferase [Source:RGD Symbol;Acc:1359615]
Smdt1	chr7	304	215	78.171	84.5212	-6.35022	0.924868	0.103614	0.760945	NotSig	-0.205404	small	68.5866	65.7178	71.4554	0.2047	0.574355	1.08731	0.565728	0.999837	Not Sig	nonsignificant	.	.	single-pass membrane protein with aspartate-rich tail 1 [Source:RGD Symbol;Acc:1311310]
Gria4	chr8	68	37	127.849	102.063	25.7866	1.25265	0.10379	0.760945	NotSig	0.309723	small	10.6623	9.39467	11.93	0.48866	0.631252	1.26986	0.527876	0.999837	Not Sig	nonsignificant	.	Y	glutamate ionotropic receptor AMPA type subunit 4 [Source:RGD Symbol;Acc:61863]
Cul3	chr9	178	163	85.2325	75.4028	9.82966	1.13036	0.104312	0.760945	NotSig	0.194118	negligible	31.2625	33.8633	28.6617	0.288914	-0.997674	0.846395	0.318438	0.999837	Not Sig	nonsignificant	.	Y	cullin 3 [Source:RGD Symbol;Acc:1308190]
Sh3bp5l	chr10	38	24	74.8651	104.852	-29.9866	0.71401	0.103938	0.760945	NotSig	-0.489516	small	6.2131	6.83578	5.59043	0.624971	-0.1619	0.817819	0.871385	0.999837	Not Sig	nonsignificant	.	.	SH3 binding domain protein 5 like [Source:RGD Symbol;Acc:1590939]
Tbrg4	chr14	38	26	82.6047	117.366	-34.7613	0.703821	0.103777	0.760945	NotSig	-0.49044	small	7.58066	7.30761	7.85371	0.543963	0.226883	1.07473	0.820515	0.999837	Not Sig	nonsignificant	.	.	transforming growth factor beta regulator 4 [Source:RGD Symbol;Acc:1309737]
Pnpla2	chr1	55	52	129.364	102.376	26.9883	1.26362	0.104429	0.761086	NotSig	0.358082	small	12.9004	14.8427	10.958	0.44732	-0.847601	0.738274	0.39666	0.999837	Not Sig	nonsignificant	.	.	patatin-like phospholipase domain containing 2 [Source:RGD Symbol;Acc:1309044]
Tmem50b	chr11	265	191	94.921	109.074	-14.1531	0.870244	0.104633	0.761086	NotSig	-0.122249	negligible	48.2678	45.5649	50.9706	0.255296	0.653056	1.11864	0.51372	0.999837	Not Sig	nonsignificant	.	.	transmembrane protein 50B [Source:RGD Symbol;Acc:1307561]
Mapre2	chr18	394	341	81.5475	87.2325	-5.68508	0.934828	0.104657	0.761086	NotSig	-0.119438	negligible	66.9754	72.9726	60.9781	0.239188	-0.832215	0.835629	0.405288	0.999837	Not Sig	nonsignificant	Y	.
Ttll11	chr3	41	23	114.974	86.9367	28.0371	1.3225	0.104524	0.761086	NotSig	0.528096	medium	8.54911	8.39396	8.70426	0.502615	0.134858	1.03697	0.892724	0.999837	Not Sig	nonsignificant	.	.	tubulin tyrosine ligase like11 [Source:RGD Symbol;Acc:1588742]
Lrrc49	chr8	94	81	70.8055	85.3928	-14.5873	0.829174	0.104803	0.761583	NotSig	-0.285507	small	22.1097	23.0891	21.1303	0.336227	-0.528783	0.915161	0.596956	0.999837	Not Sig	nonsignificant	.	.	leucine rich repeat containing 49 [Source:RGD Symbol;Acc:1309466]
Cplx1	chr14	661	573	127.324	123.161	4.16269	1.0338	0.105201	0.763351	NotSig	0.0901067	negligible	104.657	109.556	99.7583	0.198124	-0.556197	0.910569	0.578076	0.999837	Not Sig	nonsignificant	.	.
Kif5b	chr17	168	138	110.275	91.4234	18.8515	1.2062	0.105401	0.764238	NotSig	0.216118	small	25.564	24.6869	26.4412	0.314022	0.143931	1.07106	0.885555	0.999837	Not Sig	nonsignificant	.	.	kinesin family member 5B [Source:RGD Symbol;Acc:621559]
Josd2	chr1	65	55	81.3975	97.9287	-16.5312	0.831191	0.105864	0.764825	NotSig	-0.270211	small	13.8723	13.2999	14.4448	0.4333	0.245099	1.08608	0.80638	0.999837	Not Sig	nonsignificant	.	.	Josephin domain containing 2 [Source:RGD Symbol;Acc:1307305]
Ldha	chr1	879	577	105.093	101.277	3.81578	1.03768	0.105889	0.764825	NotSig	0.0678828	negligible	179.706	170.96	188.453	0.159677	0.954788	1.10232	0.339685	0.999837	Not Sig	nonsignificant	.	.	lactate dehydrogenase A [Source:RGD Symbol;Acc:2996]
Trmt1	chr19	56	45	129.256	99.0237	30.2322	1.3053	0.106087	0.764825	NotSig	0.274741	small	12.7249	12.4922	12.9576	0.453306	0.0573472	1.03726	0.954269	0.999837	Not Sig	nonsignificant	.	.	tRNA methyltransferase 1 [Source:RGD Symbol;Acc:1305992]
Ca6	chr5	29	33	86.5998	62.6524	23.9474	1.38223	0.106105	0.764825	NotSig	0.345495	small	8.48409	9.75455	7.21364	0.522311	-0.869387	0.739516	0.384635	0.999837	Not Sig	nonsignificant	.	.
LOC100359922	chr8	137	100	51.0973	60.6636	-9.56631	0.842306	0.105795	0.764825	NotSig	-0.193769	negligible	133.757	140.738	126.776	0.169348	-1.02731	0.900793	0.304272	0.999837	Not Sig	nonsignificant	.	.	60S ribosomal protein L13-like [Source:RGD Symbol;Acc:2323122]
Herc1	chr8	81	69	131.187	106.999	24.1876	1.22605	0.105725	0.764825	NotSig	0.245756	small	21.0822	23.9125	18.2518	0.376412	-0.77744	0.763275	0.436899	0.999837	Not Sig	nonsignificant	.	Y	HECT and RLD domain containing E3 ubiquitin protein ligase family member 1 [Source:RGD Symbol;Acc:1306366]
Qrich1	chr8	67	53	129.873	106.897	22.9762	1.21494	0.105821	0.764825	NotSig	0.27469	small	11.7823	10.3017	13.2628	0.467488	0.674145	1.28744	0.500219	0.999837	Not Sig	nonsignificant	.	.	glutamine-rich 1 [Source:RGD Symbol;Acc:1311095]
Gpn3	chr12	35	23	86.5149	123.977	-37.4618	0.697832	0.106574	0.765143	NotSig	-0.49208	small	7.15084	6.5434	7.75827	0.559087	0.4074	1.18566	0.683714	0.999837	Not Sig	nonsignificant	.	.	GPN-loop GTPase 3 [Source:RGD Symbol;Acc:1303034]
Mrpl41	chr3	197	175	104.361	112.555	-8.19336	0.927205	0.106577	0.765143	NotSig	-0.212139	small	41.9301	43.8641	39.9961	0.245518	-0.487303	0.91182	0.626043	0.999837	Not Sig	nonsignificant	.	.	mitochondrial ribosomal protein L41 [Source:RGD Symbol;Acc:1310241]
Tanc1	chr3	132	91	107.907	83.4562	24.451	1.29298	0.106409	0.765143	NotSig	0.21706	small	7.6982	7.16917	8.22722	0.587978	0.329798	1.14758	0.741552	0.999837	Not Sig	nonsignificant	Y	Y	tetratricopeptide repeat, ankyrin repeat and coiled-coil containing 1 [Source:RGD Symbol;Acc:1302949]
Pole3	chr5	61	53	80.5024	96.8815	-16.3791	0.830937	0.106619	0.765143	NotSig	-0.381108	small	7.83592	6.4681	9.20374	0.580865	0.713977	1.42294	0.475241	0.999837	Not Sig	nonsignificant	.	.	DNA polymerase epsilon 3, accessory subunit [Source:RGD Symbol;Acc:1359475]
Zbtb47	chr8	59	73	70.2254	91.2688	-21.0434	0.769435	0.106646	0.765143	NotSig	-0.245732	small	9.17094	9.31051	9.03137	0.488396	-0.0469115	0.970019	0.962584	0.999837	Not Sig	nonsignificant	.	.	zinc finger and BTB domain containing 47 [Source:RGD Symbol;Acc:1562434]
Tmem62	chr3	48	49	124.671	96.0405	28.6309	1.29811	0.106792	0.765294	NotSig	0.297248	small	12.0896	13.9681	10.2111	0.458483	-1.008	0.731029	0.313454	0.999837	Not Sig	nonsignificant	.	.	transmembrane protein 62 [Source:RGD Symbol;Acc:1305647]
Uhrf1bp1l	chr7	72	63	75.9234	93.6806	-17.7572	0.81045	0.106942	0.765657	NotSig	-0.318177	small	10.5738	9.41256	11.7351	0.463829	0.726188	1.24675	0.467723	0.999837	Not Sig	nonsignificant	.	Y
Psmb7	chr3	492	337	66.8756	75.1901	-8.31455	0.88942	0.107112	0.765908	NotSig	-0.0912702	negligible	108.282	101.392	115.173	0.17787	0.956892	1.13592	0.338622	0.999837	Not Sig	nonsignificant	.	.	proteasome 20S subunit beta 7 [Source:RGD Symbol;Acc:621093]
Aplp1	chr1	2111	1601	80.9642	83.0959	-2.13172	0.974346	0.107437	0.766664	NotSig	-0.0550062	negligible	508.054	500.259	515.848	0.144663	0.285805	1.03116	0.775027	0.999837	Not Sig	nonsignificant	.	.	amyloid beta precursor like protein 1 [Source:RGD Symbol;Acc:69257]
Vars1	chr20	55	47	69.7761	91.452	-21.6759	0.76298	0.107837	0.766664	NotSig	-0.320549	small	13.2294	13.5846	12.8741	0.461969	-0.182508	0.947701	0.855184	0.999837	Not Sig	nonsignificant	.	.	valyl-tRNA synthetase 1 [Source:RGD Symbol;Acc:3950]
Tigar	chr4	67	48	97.604	77.613	19.9909	1.25757	0.107837	0.766664	NotSig	0.330898	small	8.68366	7.19008	10.1772	0.55605	0.692736	1.41546	0.488475	0.999837	Not Sig	nonsignificant	.	.	TP53 induced glycolysis regulatory phosphatase [Source:RGD Symbol;Acc:1560038]
Vti1b	chr6	161	148	63.9959	73.3305	-9.33461	0.872705	0.107841	0.766664	NotSig	-0.16616	negligible	35.5338	35.1943	35.8734	0.279263	-0.0981946	1.0193	0.921778	0.999837	Not Sig	nonsignificant	.	.	vesicle transport through interaction with t-SNAREs 1B [Source:RGD Symbol;Acc:2323682]
Ubr2	chr9	50	28	117.046	83.5735	33.4724	1.40051	0.107525	0.766664	NotSig	0.411354	small	7.95493	7.12589	8.78397	0.544644	0.617387	1.23268	0.53698	0.999837	Not Sig	nonsignificant	.	Y	ubiquitin protein ligase E3 component n-recognin 2 [Source:RGD Symbol;Acc:1593237]
RT1-S3	chr20	38	14	100.794	69.0763	31.7178	1.45917	0.107535	0.766664	NotSig	0.536678	medium	6.40479	3.84989	8.9597	0.611032	1.81106	2.32726	0.0701318	0.999837	Not Sig	nonsignificant	.	.	RT1 class Ib, locus S3 [Source:RGD Symbol;Acc:735037]
Dhrs1	chr15	28	21	102.279	154.1	-51.8203	0.663723	0.108198	0.768023	NotSig	-0.313026	small	8.28364	9.35894	7.20834	0.549862	-0.605181	0.770208	0.545059	0.999837	Not Sig	nonsignificant	.	.	dehydrogenase/reductase 1 [Source:RGD Symbol;Acc:1359172]
Tfip11	chr12	44	41	77.5181	99.0555	-21.5374	0.782572	0.10844	0.768697	NotSig	-0.445575	small	9.52502	10.3372	8.71289	0.503654	-0.575876	0.842871	0.564699	0.999837	Not Sig	nonsignificant	.	.	tuftelin interacting protein 11 [Source:RGD Symbol;Acc:1311449]
Ptk2b	chr15	874	636	84.1107	89.0255	-4.91478	0.944794	0.108638	0.768988	NotSig	-0.0964435	negligible	187.401	177.65	197.151	0.143099	0.973979	1.10977	0.330067	0.999837	Not Sig	nonsignificant	.	.	protein tyrosine kinase 2 beta [Source:RGD Symbol;Acc:628758]
Adsl	chr7	105	83	89.8428	108.34	-18.497	0.829269	0.10856	0.768988	NotSig	-0.306816	small	22.9688	22.8122	23.1253	0.350192	-0.153083	1.01372	0.878333	0.999837	Not Sig	nonsignificant	.	.	adenylosuccinate lyase [Source:RGD Symbol;Acc:1307617]
Zbtb18	chr13	603	593	93.8154	97.7488	-3.9334	0.95976	0.108802	0.769025	NotSig	-0.130339	negligible	81.5149	90.7758	72.254	0.262359	-1.37533	0.795961	0.169028	0.999837	Not Sig	nonsignificant	.	Y	zinc finger and BTB domain containing 18 [Source:RGD Symbol;Acc:621548]
Socs5	chr6	92	71	83.6287	70.408	13.2207	1.18777	0.108877	0.769025	NotSig	0.241364	small	10.6309	12.0387	9.22319	0.463218	-0.901571	0.766128	0.367285	0.999837	Not Sig	nonsignificant	.	Y	suppressor of cytokine signaling 5 [Source:RGD Symbol;Acc:1564914]
Glrx2	chr13	225	175	68.1517	75.3195	-7.1678	0.904835	0.109547	0.769892	NotSig	-0.239195	small	50.5558	51.6694	49.4421	0.230592	-0.184305	0.956892	0.853774	0.999837	Not Sig	nonsignificant	.	.	glutaredoxin 2 [Source:RGD Symbol;Acc:1307950]
Wnt4	chr5	112	97	84.4194	98.6516	-14.2322	0.855733	0.109398	0.769892	NotSig	-0.22207	small	14.1186	14.3349	13.9024	0.392694	-0.106681	0.969826	0.915042	0.999837	Not Sig	nonsignificant	.	.	Wnt family member 4 [Source:RGD Symbol;Acc:621348]
RGD1307947	chr7	40	33	68.2048	97.6334	-29.4286	0.698581	0.109232	0.769892	NotSig	-0.422256	small	9.9286	9.88703	9.97017	0.537587	-0.0534346	1.00841	0.957386	0.999837	Not Sig	nonsignificant	.	.	similar to RIKEN cDNA C430008C19 [Source:RGD Symbol;Acc:1307947]
Arpp19	chr8	206	129	78.8906	67.5936	11.297	1.16713	0.109498	0.769892	NotSig	0.184361	negligible	20.0034	17.0052	23.0016	0.345775	0.992695	1.35262	0.320859	0.999837	Not Sig	nonsignificant	.	Y	cAMP-regulated phosphoprotein 19 [Source:RGD Symbol;Acc:71054]
B9d1	chr10	29	33	62.2815	96.2509	-33.9694	0.647075	0.109263	0.769892	NotSig	-0.336532	small	9.553	11.7364	7.36958	0.560758	-1.00642	0.627925	0.314212	0.999837	Not Sig	nonsignificant	.	.	B9 domain containing 1 [Source:RGD Symbol;Acc:1305522]
Trappc3	chr5	154	155	78.1146	87.9996	-9.88502	0.88767	0.109704	0.770439	NotSig	-0.201511	small	36.3774	38.9421	33.8128	0.287339	-0.968002	0.868283	0.333044	0.999837	Not Sig	nonsignificant	.	.	trafficking protein particle complex subunit 3 [Source:RGD Symbol;Acc:1309135]
Cacng8	chr1	231	166	107.412	92.697	14.7154	1.15875	0.111052	0.770545	NotSig	0.164952	negligible	22.068	21.9908	22.1451	0.331167	-0.181054	1.00702	0.856325	0.999837	Not Sig	nonsignificant	.	.	calcium voltage-gated channel auxiliary subunit gamma 8 [Source:RGD Symbol;Acc:628808]
Tial1	chr1	73	71	139.904	117.377	22.5271	1.19192	0.1104	0.770545	NotSig	0.267903	small	14.9709	16.8685	13.0732	0.399921	-1.01501	0.775007	0.310102	0.999837	Not Sig	nonsignificant	Y	Y	Tia1 cytotoxic granule-associated RNA binding protein-like 1 [Source:RGD Symbol;Acc:1595845]
Rplp2	chr1	867	611	54.2429	57.2495	-3.00651	0.947484	0.110349	0.770545	NotSig	-0.0880968	negligible	147.576	149.48	145.673	0.153172	-0.37381	0.974531	0.708546	0.999837	Not Sig	nonsignificant	.	.	ribosomal protein lateral stalk subunit P2 [Source:RGD Symbol;Acc:621775]
Chrm1	chr1	159	149	89.0823	80.6458	8.43656	1.10461	0.110782	0.770545	NotSig	0.147593	negligible	16.9786	20.4835	13.4737	0.391701	-1.41361	0.657782	0.157476	0.999837	Not Sig	nonsignificant	.	.	cholinergic receptor, muscarinic 1 [Source:RGD Symbol;Acc:2342]
Avpi1	chr1	66	53	72.7265	89.642	-16.9155	0.811299	0.110453	0.770545	NotSig	-0.287749	small	13.4631	14.2467	12.6794	0.410453	-0.453718	0.889987	0.650032	0.999837	Not Sig	nonsignificant	.	.	arginine vasopressin-induced 1 [Source:RGD Symbol;Acc:621721]
Mien1	chr10	196	142	95.334	105.959	-10.6253	0.899723	0.110651	0.770545	NotSig	-0.228075	small	45.8701	44.9416	46.7986	0.276165	0.382468	1.04132	0.702114	0.999837	Not Sig	nonsignificant	.	.	migration and invasion enhancer 1 [Source:RGD Symbol;Acc:1306682]
Rprml	chr10	195	116	85.0814	101.829	-16.7475	0.835533	0.110754	0.770545	NotSig	-0.160037	negligible	34.3689	28.2578	40.48	0.278137	1.71098	1.43252	0.0870843	0.999837	Not Sig	nonsignificant	.	Y	reprimo-like [Source:RGD Symbol;Acc:1589060]
Sf3b4	chr2	88	66	74.0973	92.378	-18.2807	0.80211	0.11099	0.770545	NotSig	-0.236247	small	18.5694	18.2279	18.9109	0.357949	0.353593	1.03747	0.723644	0.999837	Not Sig	nonsignificant	.	.	splicing factor 3B subunit 4 [Source:RGD Symbol;Acc:1309667]
Gatd3a	chr20	175	148	95.7878	99.3448	-3.55702	0.964195	0.11078	0.770545	NotSig	-0.116616	negligible	41.2086	41.6821	40.7352	0.244898	-0.106408	0.977283	0.915259	0.999837	Not Sig	nonsignificant	.	.	glutamine amidotransferase class 1 domain containing 3A [Source:RGD Symbol;Acc:1303003]
Gpcpd1	chr3	83	64	136.344	103.431	32.9132	1.31821	0.110052	0.770545	NotSig	0.186507	negligible	16.4215	15.32	17.523	0.372906	0.29232	1.1438	0.770042	0.999837	Not Sig	nonsignificant	.	Y	glycerophosphocholine phosphodiesterase 1 [Source:RGD Symbol;Acc:735140]
Tafa2	chr7	149	122	97.8623	83.2235	14.6388	1.1759	0.110992	0.770545	NotSig	0.184255	negligible	27.9702	26.0717	29.8687	0.312602	0.346119	1.14564	0.729253	0.999837	Not Sig	nonsignificant	.	Y	TAFA chemokine like family member 2 [Source:RGD Symbol;Acc:1589429]
Mroh1	chr7	45	32	119.808	86.157	33.6514	1.39058	0.110233	0.770545	NotSig	0.368788	small	10.769	10.4358	11.1022	0.475115	0.197899	1.06386	0.843124	0.999837	Not Sig	nonsignificant	.	.	maestro heat-like repeat family member 1 [Source:RGD Symbol;Acc:1642414]
Polrmt	chr7	24	24	104.772	68.4299	36.3424	1.53109	0.109961	0.770545	NotSig	0.391046	small	6.47543	8.01465	4.93621	0.607542	-1.01634	0.615898	0.309466	0.999837	Not Sig	nonsignificant	.	.	RNA polymerase mitochondrial [Source:RGD Symbol;Acc:1304599]
Cat	chr3	62	52	107.977	85.4661	22.5107	1.26339	0.11114	0.770614	NotSig	0.370793	small	14.0269	15.6436	12.4103	0.403897	-0.92625	0.793312	0.354316	0.999837	Not Sig	nonsignificant	.	.	catalase [Source:RGD Symbol;Acc:2279]
Ywhah	chr14	3024	2346	107.128	110.517	-3.3886	0.969339	0.111367	0.771235	NotSig	-0.0617572	negligible	598.04	590.658	605.422	0.130204	0.177473	1.025	0.859137	0.999837	Not Sig	nonsignificant	.	Y	tyrosine 3-monooxygenase/tryptophan 5-monooxygenase activation protein, eta [Source:RGD Symbol;Acc:3978]
Cyp7b1	chr2	49	65	71.7577	90.3459	-18.5883	0.794254	0.111531	0.771235	NotSig	-0.280222	small	12.2149	14.7686	9.66116	0.450386	-1.45747	0.654169	0.144986	0.999837	Not Sig	nonsignificant	.	Y	cytochrome P450 family 7 subfamily B member 1 [Source:RGD Symbol;Acc:2483]
Shfl	chr8	53	46	81.358	110.799	-29.4407	0.734287	0.11203	0.774054	NotSig	-0.165316	negligible	12.2442	12.5027	11.9857	0.431204	-0.290371	0.958647	0.771533	0.999837	Not Sig	nonsignificant	.	.	shiftless antiviral inhibitor of ribosomal frameshifting [Source:RGD Symbol;Acc:1565995]
Mast3	chr16	352	267	88.7545	95.6641	-6.90966	0.927772	0.112465	0.775969	NotSig	-0.160369	negligible	55.6725	52.3295	59.0155	0.256546	0.726398	1.12777	0.467595	0.999837	Not Sig	nonsignificant	.	Y	microtubule associated serine/threonine kinase 3 [Source:RGD Symbol;Acc:1587639]
Asic2	chr10	55	52	88.9924	105.904	-16.9113	0.840314	0.112647	0.776681	NotSig	-0.330885	small	13.3499	13.8208	12.8789	0.431834	-0.0454487	0.931848	0.96375	0.999837	Not Sig	nonsignificant	.	.	acid sensing ion channel subunit 2 [Source:RGD Symbol;Acc:2017]
Pgam5	chr12	66	71	89.8677	75.9576	13.9101	1.18313	0.11338	0.777669	NotSig	0.310612	small	16.3265	17.2449	15.4081	0.370447	-0.492902	0.893483	0.622082	0.999837	Not Sig	nonsignificant	.	Y	PGAM family member 5, mitochondrial serine/threonine protein phosphatase [Source:RGD Symbol;Acc:1312028]
Mrps14	chr13	120	104	74.9764	90.1024	-15.126	0.832125	0.11329	0.777669	NotSig	-0.207343	small	10.3481	12.2016	8.49467	0.486881	-1.0829	0.696193	0.278855	0.999837	Not Sig	nonsignificant	.	.	mitochondrial ribosomal protein S14 [Source:RGD Symbol;Acc:1309432]
Naa35	chr17	66	63	70.3471	87.3326	-16.9855	0.805508	0.113372	0.777669	NotSig	-0.299621	small	15.575	17.0329	14.1171	0.389536	-0.710984	0.828811	0.477094	0.999837	Not Sig	nonsignificant	.	.	N(alpha)-acetyltransferase 35, NatC auxiliary subunit [Source:RGD Symbol;Acc:621771]
Cxcl12	chr4	255	235	89.1382	99.7055	-10.5673	0.894015	0.113306	0.777669	NotSig	-0.133106	negligible	53.7212	57.0891	50.3532	0.277071	-0.632031	0.88201	0.527367	0.999837	Not Sig	nonsignificant	.	.	C-X-C motif chemokine ligand 12 [Source:RGD Symbol;Acc:3651]
Tram1	chr5	130	85	78.8193	68.7561	10.0633	1.14636	0.113399	0.777669	NotSig	0.19123	negligible	23.2594	20.308	26.2108	0.393823	0.829883	1.29066	0.406605	0.999837	Not Sig	nonsignificant	.	Y	translocation associated membrane protein 1 [Source:RGD Symbol;Acc:1359100]
Cebpzos	chr6	42	45	91.9532	68.2576	23.6956	1.34715	0.113126	0.777669	NotSig	0.378135	small	11.2896	12.5096	10.0696	0.451042	-0.877252	0.804946	0.38035	0.999837	Not Sig	nonsignificant	.	.	CEBPZ opposite strand [Source:RGD Symbol;Acc:9177508]
Max	chr6	112	86	81.9855	68.9511	13.0343	1.18904	0.113496	0.777669	NotSig	0.231502	small	22.1578	21.4972	22.8185	0.32845	0.270812	1.06147	0.786536	0.999837	Not Sig	nonsignificant	.	Y	MYC associated factor X [Source:RGD Symbol;Acc:621101]
Scara3	chr15	67	67	74.2531	89.7709	-15.5177	0.827141	0.113627	0.777982	NotSig	-0.261735	small	11.802	13.2905	10.3135	0.469656	-0.789036	0.77601	0.430091	0.999837	Not Sig	nonsignificant	.	.	scavenger receptor class A, member 3 [Source:RGD Symbol;Acc:1309269]
Tnip1	chr10	45	62	102.19	86.7631	15.4268	1.1778	0.113896	0.779282	NotSig	0.309738	small	14.8605	19.3226	10.3984	0.418193	-1.94472	0.538144	0.0518086	0.999837	Not Sig	nonsignificant	.	.	TNFAIP3 interacting protein 1 [Source:RGD Symbol;Acc:1309380]
LOC103690163	chr1	31	35	133.367	93.2902	40.0772	1.4296	0.115486	0.780019	NotSig	0.401857	small	6.78324	8.18881	5.37767	0.572173	-1.0175	0.656709	0.308917	0.999837	Not Sig	nonsignificant	.	.
Fxyd1	chr1	132	120	88.4967	77.5551	10.9416	1.14108	0.11712	0.780019	NotSig	0.178969	negligible	28.158	32.7136	23.6024	0.295499	-1.4918	0.721488	0.135753	0.999837	Not Sig	nonsignificant	.	.	FXYD domain-containing ion transport regulator 1 [Source:RGD Symbol;Acc:69306]
Tollip	chr1	220	115	110.712	102.766	7.94577	1.07732	0.117214	0.780019	NotSig	0.2128	small	23.3085	18.2867	28.3303	0.4032	1.55742	1.54923	0.119371	0.999837	Not Sig	nonsignificant	.	Y	toll interacting protein [Source:RGD Symbol;Acc:1304676]
Atg2a	chr1	32	38	86.8934	106.776	-19.8828	0.81379	0.115486	0.780019	NotSig	-0.295079	small	8.2622	9.29582	7.22858	0.528912	-0.887285	0.777616	0.374926	0.999837	Not Sig	nonsignificant	.	.	autophagy related 2A [Source:RGD Symbol;Acc:1589890]
Stub1	chr10	332	249	77.1966	82.7622	-5.56557	0.932752	0.116543	0.780019	NotSig	-0.10508	negligible	76.1408	74.2979	77.9837	0.212831	0.28663	1.04961	0.774396	0.999837	Not Sig	nonsignificant	.	.	STIP1 homology and U-box containing protein 1 [Source:RGD Symbol;Acc:1306167]
Hnrnph1	chr10	247	173	121.622	107.65	13.9723	1.12979	0.117802	0.780019	NotSig	0.175054	negligible	48.4356	44.6201	52.2511	0.241205	0.713047	1.17102	0.475816	0.999837	Not Sig	nonsignificant	.	Y	heterogeneous nuclear ribonucleoprotein H1 [Source:RGD Symbol;Acc:620840]
Nf1	chr10	69	42	105.061	72.5947	32.4667	1.44723	0.116693	0.780019	NotSig	0.272365	small	6.42849	5.68299	7.17399	0.644486	0.501651	1.26236	0.615913	0.999837	Not Sig	nonsignificant	.	Y	neurofibromin 1 [Source:RGD Symbol;Acc:3168]
Tob1	chr10	152	37	88.1222	73.5847	14.5375	1.19756	0.118753	0.780019	NotSig	0.214986	small	18.2325	8.05726	28.4078	0.50397	3.45258	3.52575	0.000555259	0.0523451	Not Sig	nonsignificant	.	Y	transducer of ErbB-2.1 [Source:RGD Symbol;Acc:621126]
Rab5c	chr10	262	219	81.6127	91.0905	-9.47784	0.895951	0.118635	0.780019	NotSig	-0.121057	negligible	54.929	56.395	53.463	0.229227	-0.200082	0.948011	0.841416	0.999837	Not Sig	nonsignificant	.	Y	RAB5C, member RAS oncogene family [Source:RGD Symbol;Acc:1307095]
Lfng	chr12	112	68	100.524	78.3412	22.1828	1.28316	0.115114	0.780019	NotSig	0.173566	negligible	17.7501	15.8592	19.6411	0.388146	0.71309	1.23847	0.47579	0.999837	Not Sig	nonsignificant	.	.	LFNG O-fucosylpeptide 3-beta-N-acetylglucosaminyltransferase [Source:RGD Symbol;Acc:620587]
Rplp0	chr12	1141	836	66.0247	69.17	-3.1453	0.954528	0.116272	0.780019	NotSig	-0.0441364	negligible	266.25	255.248	277.251	0.145729	0.851355	1.0862	0.394572	0.999837	Not Sig	nonsignificant	.	.	ribosomal protein lateral stalk subunit P0 [Source:RGD Symbol;Acc:621247]
Commd1	chr14	140	95	77.5969	90.2477	-12.6508	0.859822	0.114571	0.780019	NotSig	-0.169713	negligible	32.4225	32.298	32.5471	0.279708	0.251657	1.00771	0.801306	0.999837	Not Sig	nonsignificant	.	Y	copper metabolism domain containing 1 [Source:RGD Symbol;Acc:1311771]
Vcl	chr15	48	25	110.411	86.8495	23.5615	1.27129	0.116548	0.780019	NotSig	0.382761	small	6.7619	4.20036	9.32343	0.682026	1.47848	2.21967	0.139278	0.999837	Not Sig	nonsignificant	.	.	vinculin [Source:RGD Symbol;Acc:1311217]
Fbxo34	chr15	73	33	91.0199	68.7777	22.2422	1.32339	0.118151	0.780019	NotSig	0.326633	small	7.21399	3.88721	10.5408	0.627359	1.95088	2.71166	0.0510708	0.999837	Not Sig	nonsignificant	.	.	F-box protein 34 [Source:RGD Symbol;Acc:1310108]
Sugp2	chr16	102	85	86.4083	74.5499	11.8584	1.15907	0.118704	0.780019	NotSig	0.214804	small	15.4311	13.4254	17.4368	0.41216	0.915471	1.2988	0.359944	0.999837	Not Sig	nonsignificant	Y	.	SURP and G patch domain containing 2 [Source:RGD Symbol;Acc:1306042]
LOC100911664	chr17	289	185	111.355	105.315	6.04027	1.05735	0.116403	0.780019	NotSig	0.146753	negligible	52.9436	46.8652	59.0221	0.232005	1.17162	1.2594	0.241351	0.999837	Not Sig	nonsignificant	.	Y
Trim27	chr17	55	43	87.4473	111.838	-24.3909	0.781909	0.116063	0.780019	NotSig	-0.212299	small	12.6735	12.12	13.227	0.442	0.264793	1.09134	0.791169	0.999837	Not Sig	nonsignificant	.	.	tripartite motif-containing 27 [Source:RGD Symbol;Acc:1310105]
Galnt1	chr18	72	60	74.5468	87.4104	-12.8635	0.852838	0.118583	0.780019	NotSig	-0.282398	small	12.7597	12.9322	12.5871	0.45145	-0.389621	0.973318	0.696817	0.999837	Not Sig	nonsignificant	.	Y	polypeptide N-acetylgalactosaminyltransferase 1 [Source:RGD Symbol;Acc:620358]
Tpgs2	chr18	84	89	73.4711	88.6559	-15.1848	0.828722	0.117757	0.780019	NotSig	-0.279932	small	14.0375	14.1819	13.8932	0.431899	-0.236038	0.979643	0.813403	0.999837	Not Sig	nonsignificant	.	Y	tubulin polyglutamylase complex subunit 2 [Source:RGD Symbol;Acc:1310571]
Brd8	chr18	34	30	73.528	100.414	-26.8865	0.732244	0.118567	0.780019	NotSig	-0.41042	small	7.83007	7.91604	7.74409	0.566643	0.0856904	0.978278	0.931713	0.999837	Not Sig	nonsignificant	.	.	bromodomain containing 8 [Source:RGD Symbol;Acc:1307003]
Kcng2	chr18	147	127	67.2993	77.6223	-10.323	0.86701	0.117438	0.780019	NotSig	-0.12219	negligible	27.4136	29.0506	25.7766	0.311708	-0.486603	0.8873	0.62654	0.999837	Not Sig	nonsignificant	.	.	potassium voltage-gated channel modifier subfamily G member 2 [Source:RGD Symbol;Acc:1309521]
Nol3	chr19	23	32	110.836	77.7138	33.1222	1.42621	0.118439	0.780019	NotSig	0.242157	small	6.30743	8.03543	4.57942	0.646597	-1.19792	0.569904	0.230947	0.999837	Not Sig	nonsignificant	.	.	nucleolar protein 3 [Source:RGD Symbol;Acc:708558]
Aprt	chr19	104	95	93.6408	82.2775	11.3633	1.13811	0.118764	0.780019	NotSig	0.151587	negligible	24.076	28.066	20.0859	0.374497	-0.920738	0.715668	0.357187	0.999837	Not Sig	nonsignificant	.	.	adenine phosphoribosyl transferase [Source:RGD Symbol;Acc:1307758]
Ndufaf2	chr2	32	25	82.1268	60.3586	21.7682	1.36065	0.11496	0.780019	NotSig	0.439278	small	7.90953	8.56443	7.25464	0.565109	-0.277037	0.847066	0.781752	0.999837	Not Sig	nonsignificant	.	.	NADH:ubiquinone oxidoreductase complex assembly factor 2 [Source:RGD Symbol;Acc:1560158]
Pelo	chr2	28	38	68.2296	90.7142	-22.4846	0.752138	0.114898	0.780019	NotSig	-0.421877	small	9.62818	12.0125	7.24386	0.510904	-1.2499	0.603027	0.211337	0.999837	Not Sig	nonsignificant	.	.	pelota mRNA surveillance and ribosome rescue factor [Source:RGD Symbol;Acc:1359591]
Celsr2	chr2	212	203	110.412	99.6684	10.7437	1.10779	0.116913	0.780019	NotSig	0.135602	negligible	41.548	43.3246	39.7714	0.271014	-0.426956	0.917987	0.669412	0.999837	Not Sig	nonsignificant	.	.	cadherin, EGF LAG seven-pass G-type receptor 2 [Source:RGD Symbol;Acc:69237]
Rpl34	chr2	727	580	52.7408	56.6842	-3.94344	0.930431	0.118163	0.780019	NotSig	-0.10262	negligible	64.615	66.4722	62.7579	0.225681	-0.546209	0.944122	0.584922	0.999837	Not Sig	nonsignificant	.	.	ribosomal protein L34 [Source:RGD Symbol;Acc:1309402]
Kifbp	chr20	238	191	80.3761	91.7697	-11.3936	0.875846	0.115911	0.780019	NotSig	-0.159556	negligible	49.6389	52.334	46.9438	0.231679	-0.499953	0.897004	0.617108	0.999837	Not Sig	nonsignificant	.	.	kinesin family binding protein [Source:RGD Symbol;Acc:1593126]
Cdk19	chr20	74	51	86.3375	71.9385	14.3989	1.20016	0.115264	0.780019	NotSig	0.334943	small	7.68732	7.43149	7.94315	0.5766	0.119012	1.06885	0.905266	0.999837	Not Sig	nonsignificant	.	Y	cyclin-dependent kinase 19 [Source:RGD Symbol;Acc:1305435]
Flrt3	chr3	63	52	103.172	74.1068	29.0654	1.39221	0.114309	0.780019	NotSig	0.292818	small	12.1391	12.8835	11.3948	0.436531	-0.573507	0.884445	0.566302	0.999837	Not Sig	nonsignificant	.	.	fibronectin leucine rich transmembrane protein 3 [Source:RGD Symbol;Acc:1566005]
Sri	chr4	189	141	74.0047	89.59	-15.5852	0.826038	0.115064	0.780019	NotSig	-0.171165	negligible	38.9572	37.1416	40.7727	0.275305	0.485241	1.09777	0.627505	0.999837	Not Sig	nonsignificant	.	.	sorcin [Source:RGD Symbol;Acc:1584485]
Snx10	chr4	246	216	103.97	92.9601	11.0096	1.11843	0.117056	0.780019	NotSig	0.13158	negligible	46.6979	50.6232	42.7727	0.227499	-1.04264	0.844923	0.297117	0.999837	Not Sig	nonsignificant	.	Y	sorting nexin 10 [Source:RGD Symbol;Acc:1305782]
Ppm1k	chr4	69	53	86.1469	121.135	-34.9876	0.711167	0.114562	0.780019	NotSig	-0.239948	small	9.19743	10.4011	7.99377	0.545374	-0.459675	0.768551	0.645749	0.999837	Not Sig	nonsignificant	Y	Y	protein phosphatase, Mg2+/Mn2+ dependent, 1K [Source:RGD Symbol;Acc:1308501]
Suclg2	chr4	55	44	113.936	95.5378	18.398	1.19257	0.116304	0.780019	NotSig	0.361678	small	12.7861	12.9673	12.6049	0.4223	-0.0291568	0.972054	0.97674	0.999837	Not Sig	nonsignificant	.	.	succinate-CoA ligase GDP-forming subunit beta [Source:RGD Symbol;Acc:1305008]
Marcksl1	chr5	186	154	77.2302	85.0808	-7.8506	0.907728	0.117166	0.780019	NotSig	-0.18294	negligible	25.2736	27.4954	23.0517	0.317137	-0.843821	0.838384	0.398769	0.999837	Not Sig	nonsignificant	.	.	MARCKS-like 1 [Source:RGD Symbol;Acc:621197]
Arhgap5	chr6	130	92	80.2072	65.0669	15.1403	1.23269	0.118722	0.780019	NotSig	0.171877	negligible	15.9091	17.4016	14.4166	0.39935	-0.749552	0.828464	0.453524	0.999837	Not Sig	nonsignificant	.	Y	Rho GTPase activating protein 5 [Source:RGD Symbol;Acc:1308507]
Kcnc2	chr7	81	58	120.584	142.683	-22.0994	0.845115	0.115967	0.780019	NotSig	-0.288498	small	16.2104	16.51	15.9109	0.384924	-0.261366	0.963713	0.79381	0.999837	Not Sig	nonsignificant	.	.	potassium voltage-gated channel subfamily C member 2 [Source:RGD Symbol;Acc:628829]
Kcnh3	chr7	72	52	92.5343	70.8416	21.6927	1.30621	0.117049	0.780019	NotSig	0.230383	small	14.917	13.7413	16.0927	0.413472	0.349154	1.17112	0.726974	0.999837	Not Sig	nonsignificant	.	.	potassium voltage-gated channel subfamily H member 3 [Source:RGD Symbol;Acc:71070]
Chst2	chr8	316	221	83.7625	74.0652	9.6973	1.13093	0.1174	0.780019	NotSig	0.0799817	negligible	9.83328	7.67555	11.991	0.505173	1.27568	1.56224	0.202068	0.999837	Not Sig	nonsignificant	Y	Y	carbohydrate sulfotransferase 2 [Source:RGD Symbol;Acc:1306988]
Ctps2	chrX	57	42	70.0011	87.0595	-17.0584	0.80406	0.11763	0.780019	NotSig	-0.245216	small	10.8123	9.60062	12.0241	0.473999	0.487009	1.25243	0.626252	0.999837	Not Sig	nonsignificant	Y	.	CTP synthase 2 [Source:RGD Symbol;Acc:1563369]
Mrps6	chr11	104	78	77.4619	99.1877	-21.7258	0.780963	0.11456	0.780019	NotSig	-0.318825	small	21.9301	20.494	23.3662	0.331727	0.589263	1.14015	0.555685	0.999837	Not Sig	nonsignificant	.	.	mitochondrial ribosomal protein S6 [Source:RGD Symbol;Acc:2322928]
Ccnh	chr2	72	46	82.0401	60.1695	21.8706	1.36348	0.115144	0.780019	NotSig	0.29646	small	16.5539	14.4994	18.6084	0.380021	1.05937	1.28339	0.289432	0.999837	Not Sig	nonsignificant	Y	.	cyclin H [Source:RGD Symbol;Acc:69419]
Kmt2e	chr4	58	49	81.0547	108.626	-27.5718	0.746178	0.11652	0.780019	NotSig	-0.334653	small	10.7697	9.75812	11.7812	0.485439	0.433563	1.20733	0.664606	0.999837	Not Sig	nonsignificant	.	Y	lysine methyltransferase 2E [Source:RGD Symbol;Acc:1309641]
Reln	chr4	59	47	121.55	141.979	-20.4299	0.856107	0.117698	0.780019	NotSig	-0.311269	small	12.0924	11.5782	12.6066	0.427838	0.286005	1.08882	0.774874	0.999837	Not Sig	nonsignificant	Y	Y	reelin [Source:RGD Symbol;Acc:3553]
Ube2s	chr1	337	229	81.3133	72.1412	9.17208	1.12714	0.12067	0.780473	NotSig	0.140295	negligible	71.9592	66.4494	77.469	0.200701	1.00406	1.16583	0.315351	0.999837	Not Sig	nonsignificant	.	.	ubiquitin-conjugating enzyme E2S [Source:RGD Symbol;Acc:1564746]
Timm10b	chr1	62	47	89.4507	107.581	-18.1307	0.83147	0.120854	0.780473	NotSig	-0.294353	small	13.6177	14.4647	12.7707	0.414893	-0.478915	0.882883	0.631999	0.999837	Not Sig	nonsignificant	.	Y	translocase of inner mitochondrial membrane 10B [Source:RGD Symbol;Acc:71097]
Sec23ip	chr1	54	30	92.9025	111.028	-18.1256	0.836747	0.121214	0.780473	NotSig	-0.406821	small	10.5563	9.11237	12.0002	0.464654	0.790074	1.31691	0.429484	0.999837	Not Sig	nonsignificant	.	.	SEC23 interacting protein [Source:RGD Symbol;Acc:1309328]
Phb	chr10	177	138	69.8331	78.1572	-8.3241	0.893495	0.120561	0.780473	NotSig	-0.0989032	negligible	29.3545	30.0538	28.6553	0.280516	-0.259382	0.953466	0.795341	0.999837	Not Sig	nonsignificant	.	.
Grin2c	chr10	79	88	109.809	91.3291	18.4799	1.20234	0.119258	0.780473	NotSig	0.273374	small	14.2397	15.7803	12.699	0.41499	-0.644254	0.804737	0.519411	0.999837	Not Sig	nonsignificant	.	.	glutamate ionotropic receptor NMDA type subunit 2C [Source:RGD Symbol;Acc:2739]
Usp12	chr12	101	53	93.9612	81.3989	12.5622	1.15433	0.122103	0.780473	NotSig	0.268317	small	14.9614	12.468	17.4548	0.400462	1.3147	1.39996	0.188612	0.999837	Not Sig	nonsignificant	.	Y	ubiquitin specific peptidase 12 [Source:RGD Symbol;Acc:1308045]
Brap	chr12	61	40	91.9554	113.857	-21.902	0.807637	0.118991	0.780473	NotSig	-0.34189	small	7.37992	7.49026	7.26958	0.552634	-0.136017	0.970538	0.891808	0.999837	Not Sig	nonsignificant	.	.	BRCA1 associated protein [Source:RGD Symbol;Acc:1586551]
Nudt9	chr14	75	85	74.9479	92.1055	-17.1576	0.813718	0.12097	0.780473	NotSig	-0.280682	small	21.1272	21.2713	20.9832	0.380921	-0.332369	0.986456	0.739611	0.999837	Not Sig	nonsignificant	.	Y	nudix hydrolase 9 [Source:RGD Symbol;Acc:1359522]
Dad1	chr15	350	267	86.0596	92.7564	-6.69678	0.927803	0.1215	0.780473	NotSig	-0.11518	negligible	80.6961	77.8732	83.519	0.216662	0.354987	1.0725	0.7226	0.999837	Not Sig	nonsignificant	.	.	defender against cell death 1 [Source:RGD Symbol;Acc:621028]
Mrpl57	chr15	104	77	85.1987	97.5166	-12.3179	0.873684	0.119533	0.780473	NotSig	-0.165335	negligible	22.0941	21.2307	22.9575	0.329449	0.196943	1.08134	0.843872	0.999837	Not Sig	nonsignificant	.	.	mitochondrial ribosomal protein L57 [Source:RGD Symbol;Acc:1594654]
LOC108348509	chr17	211	168	56.9461	50.6657	6.28034	1.12396	0.122413	0.780473	NotSig	0.171551	negligible	9.8543	8.34804	11.3606	0.478893	0.761525	1.36087	0.446343	0.999837	Not Sig	nonsignificant	.	.	60S ribosomal protein L35a pseudogene [Source:RGD Symbol;Acc:11442307]
Cdh13	chr19	98	89	78.4299	94.1831	-15.7532	0.832739	0.120131	0.780473	NotSig	-0.228264	small	21.5513	20.3296	22.7731	0.332678	0.398011	1.1202	0.690622	0.999837	Not Sig	nonsignificant	.	Y	cadherin 13 [Source:RGD Symbol;Acc:619745]
Mtrex	chr2	54	48	95.0865	119.176	-24.09	0.797863	0.122247	0.780473	NotSig	-0.290051	small	13.9908	14.4336	13.5481	0.408461	-0.0589195	0.938646	0.953016	0.999837	Not Sig	nonsignificant	.	.	Mtr4 exosome RNA helicase [Source:RGD Symbol;Acc:1305984]
Ndufb5	chr2	402	306	76.5502	71.4025	5.14777	1.0721	0.12307	0.780473	NotSig	0.0585315	negligible	93.1032	92.6388	93.5677	0.177399	0.0645237	1.01003	0.948553	0.999837	Not Sig	nonsignificant	.	.	NADH:ubiquinone oxidoreductase subunit B5 [Source:RGD Symbol;Acc:1305909]
Anp32e	chr2	146	103	84.7001	95.8191	-11.119	0.883959	0.122449	0.780473	NotSig	-0.232531	small	25.0702	24.7005	25.4399	0.31483	0.270114	1.02993	0.787072	0.999837	Not Sig	nonsignificant	Y	.	acidic nuclear phosphoprotein 32 family member E [Source:RGD Symbol;Acc:1310611]
LOC102549726	chr20	80	64	137.283	112.298	24.9854	1.22249	0.120674	0.780473	NotSig	0.235332	small	17.3407	17.451	17.2304	0.367045	-0.185663	0.987361	0.852709	0.999837	Not Sig	nonsignificant	.	.
Zmynd19	chr3	66	69	77.7567	95.1683	-17.4116	0.817044	0.120728	0.780473	NotSig	-0.265241	small	12.1279	15.2461	9.00962	0.445192	-1.46903	0.590944	0.141824	0.999837	Not Sig	nonsignificant	.	.	zinc finger, MYND-type containing 19 [Source:RGD Symbol;Acc:735079]
Rnf208	chr3	275	179	93.9266	100.245	-6.31871	0.936968	0.120445	0.780473	NotSig	-0.141625	negligible	55.5499	55.4727	55.6271	0.244029	0.164515	1.00278	0.869326	0.999837	Not Sig	nonsignificant	.	.	ring finger protein 208 [Source:RGD Symbol;Acc:1565957]
Snrnp200	chr3	110	89	94.9105	78.1837	16.7268	1.21394	0.121784	0.780473	NotSig	0.227144	small	28.5192	28.8143	28.2241	0.291725	-0.0863962	0.979515	0.931151	0.999837	Not Sig	nonsignificant	.	.	small nuclear ribonucleoprotein U5 subunit 200 [Source:RGD Symbol;Acc:1561120]
Galnt11	chr4	66	48	118.619	100.08	18.5389	1.18524	0.120531	0.780473	NotSig	0.338109	small	15.535	14.7511	16.3189	0.387024	0.403762	1.10628	0.686388	0.999837	Not Sig	nonsignificant	.	.	polypeptide N-acetylgalactosaminyltransferase 11 [Source:RGD Symbol;Acc:735097]
Sec13	chr4	59	55	77.075	99.5816	-22.5066	0.773989	0.120215	0.780473	NotSig	-0.280683	small	13.3114	13.5923	13.0306	0.41648	0.0239823	0.958679	0.980867	0.999837	Not Sig	nonsignificant	.	.	SEC13 homolog, nuclear pore and COPII coat complex component [Source:RGD Symbol;Acc:1359555]
Slc2a3	chr4	154	101	104.815	89.5362	15.2793	1.17065	0.121697	0.780473	NotSig	0.176869	negligible	16.7136	14.6434	18.7838	0.401048	0.562249	1.28275	0.573947	0.999837	Not Sig	nonsignificant	.	.	solute carrier family 2 member 3 [Source:RGD Symbol;Acc:3706]
Whrn	chr5	33	24	88.6087	122.234	-33.6248	0.724914	0.122676	0.780473	NotSig	-0.257079	small	6.5801	6.99605	6.16415	0.603882	-0.150649	0.88109	0.880252	0.999837	Not Sig	nonsignificant	.	.	whirlin [Source:RGD Symbol;Acc:631330]
Rcc2	chr5	134	93	86.6401	74.8638	11.7763	1.1573	0.119278	0.780473	NotSig	0.117014	negligible	16.4238	14.5644	18.2832	0.401228	0.748834	1.25534	0.453957	0.999837	Not Sig	nonsignificant	.	.	regulator of chromosome condensation 2 [Source:RGD Symbol;Acc:1309986]
Nadk	chr5	74	71	109.336	93.3583	15.978	1.17115	0.121973	0.780473	NotSig	0.12901	negligible	16.0754	18.1813	13.9695	0.388919	-0.986291	0.768344	0.32399	0.999837	Not Sig	nonsignificant	Y	.	NAD kinase [Source:RGD Symbol;Acc:1642420]
RGD1566401	chr6	71	56	257.503	269.15	-11.6464	0.956729	0.119626	0.780473	NotSig	-0.245649	small	6.32092	5.24251	7.39933	0.712216	0.742948	1.41141	0.457513	0.999837	Not Sig	nonsignificant	.	.
Ddx23	chr7	83	72	66.8071	83.4808	-16.6737	0.800269	0.120257	0.780473	NotSig	-0.265952	small	21.1043	21.6297	20.579	0.325796	-0.183438	0.951424	0.854455	0.999837	Not Sig	nonsignificant	.	.	DEAD-box helicase 23 [Source:RGD Symbol;Acc:1308685]
Acot13	chr17	45	46	81.8924	96.199	-14.3066	0.851281	0.119717	0.780473	NotSig	-0.351402	small	11.7172	13.306	10.1285	0.461089	-0.729729	0.761201	0.465556	0.999837	Not Sig	nonsignificant	.	.	acyl-CoA thioesterase 13 [Source:RGD Symbol;Acc:1306513]
Plxna2	chr13	76	54	128.171	90.4884	37.6821	1.41643	0.12122	0.780473	NotSig	0.287431	small	9.05151	9.2786	8.82441	0.494513	-0.284724	0.951049	0.775856	0.999837	Not Sig	nonsignificant	.	.	plexin A2 [Source:RGD Symbol;Acc:1305325]
Rtl5	chrX	53	25	121.336	75.3965	45.9391	1.6093	0.123098	0.780473	NotSig	0.458562	small	6.03404	5.67173	6.39636	0.649806	0.517671	1.12776	0.604688	0.999837	Not Sig	nonsignificant	.	.	retrotransposon Gag like 5 [Source:RGD Symbol;Acc:6490575]
Mterf3	chr7	30	28	88.7496	62.1293	26.6203	1.42847	0.123417	0.781852	NotSig	0.410995	small	6.60224	7.07056	6.13391	0.569125	-0.432233	0.867528	0.665572	0.999837	Not Sig	nonsignificant	.	.	mitochondrial transcription termination factor 3 [Source:RGD Symbol;Acc:735158]
Wiz	chr7	31	32	66.0451	92.4881	-26.443	0.714093	0.123588	0.782431	NotSig	-0.415233	small	7.18644	7.87369	6.49919	0.553198	-0.480281	0.825432	0.631028	0.999837	Not Sig	nonsignificant	.	.	WIZ zinc finger [Source:RGD Symbol;Acc:1307771]
Sec11a	chr1	77	68	72.8091	92.2591	-19.45	0.789181	0.123724	0.782598	NotSig	-0.213157	small	18.3545	19.0702	17.6388	0.351112	-0.236374	0.924942	0.813143	0.999837	Not Sig	nonsignificant	.	Y	SEC11 homolog A, signal peptidase complex subunit [Source:RGD Symbol;Acc:69360]
Slc9a3r2	chr10	66	59	81.6766	98.0899	-16.4133	0.832671	0.124019	0.782598	NotSig	-0.23029	small	13.6785	13.4477	13.9093	0.423339	0.0112023	1.03432	0.991062	0.999837	Not Sig	nonsignificant	.	.
Atp5mc1	chr10	638	474	82.7384	85.9491	-3.21074	0.962644	0.124291	0.782598	NotSig	-0.0722189	negligible	143.953	142.922	144.984	0.170926	0.280507	1.01442	0.779089	0.999837	Not Sig	nonsignificant	.	.	ATP synthase membrane subunit c locus 1 [Source:RGD Symbol;Acc:61933]
Utp3	chr14	55	36	53.7983	73.9867	-20.1884	0.727134	0.123998	0.782598	NotSig	-0.341605	small	9.62878	9.03178	10.2258	0.49041	0.454954	1.1322	0.649142	0.999837	Not Sig	nonsignificant	.	.	UTP3, small subunit processome component [Source:RGD Symbol;Acc:1308540]
Twf2	chr8	98	68	79.1924	97.3655	-18.1731	0.813352	0.123927	0.782598	NotSig	-0.290323	small	21.2059	20.391	22.0208	0.338898	0.444911	1.07993	0.656384	0.999837	Not Sig	nonsignificant	.	Y	twinfilin actin-binding protein 2 [Source:RGD Symbol;Acc:1591460]
Acat1	chr8	161	126	86.5946	97.0444	-10.4498	0.892319	0.12409	0.782598	NotSig	-0.22847	small	27.8263	27.2436	28.4091	0.309791	0.0219424	1.04278	0.982494	0.999837	Not Sig	nonsignificant	.	.	acetyl-CoA acetyltransferase 1 [Source:RGD Symbol;Acc:2016]
Polr2f	chr7	168	139	69.8643	79.8915	-10.0272	0.87449	0.124412	0.782608	NotSig	-0.169768	negligible	38.3304	37.1868	39.4741	0.252386	0.301816	1.06151	0.762793	0.999837	Not Sig	nonsignificant	.	.	RNA polymerase II, I and III subunit F [Source:RGD Symbol;Acc:708567]
Pde4dip	chr2	138	79	96.9337	77.8303	19.1035	1.24545	0.12456	0.783038	NotSig	0.229352	small	23.4964	18.6462	28.3466	0.325894	1.62553	1.52024	0.104049	0.999837	Not Sig	nonsignificant	.	.	phosphodiesterase 4D interacting protein [Source:RGD Symbol;Acc:708410]
Fnta	chr16	65	67	62.5548	76.696	-14.1412	0.81562	0.125029	0.785486	NotSig	-0.288305	small	16.7141	19.5063	13.9218	0.383857	-1.10647	0.713707	0.268523	0.999837	Not Sig	nonsignificant	.	Y	farnesyltransferase, CAAX box, alpha [Source:RGD Symbol;Acc:2625]
Rpl38	chr10	88	90	79.8051	67.6318	12.1734	1.17999	0.125549	0.78674	NotSig	0.272616	small	7.92426	8.32474	7.52377	0.548732	-0.330558	0.903785	0.740978	0.999837	Not Sig	nonsignificant	.	.	ribosomal protein L38 [Source:RGD Symbol;Acc:1305573]
Tstd3	chr5	121	99	76.4029	88.3888	-11.9859	0.864396	0.125543	0.78674	NotSig	-0.198965	negligible	28.648	30.0896	27.2064	0.297865	-0.600403	0.90418	0.548238	0.999837	Not Sig	nonsignificant	.	.	thiosulfate sulfurtransferase like domain containing 3 [Source:RGD Symbol;Acc:1563572]
Gfus	chr7	43	22	91.8151	127.595	-35.7799	0.719582	0.125489	0.78674	NotSig	-0.298214	small	8.16197	7.17525	9.14869	0.545546	0.75889	1.27503	0.447918	0.999837	Not Sig	nonsignificant	.	.	GDP-L-fucose synthase [Source:RGD Symbol;Acc:1307028]
Entpd6	chr3	110	94	105.085	122.249	-17.1641	0.859598	0.125734	0.787353	NotSig	-0.293542	small	20.9947	20.9694	21.02	0.348278	-0.0673108	1.00241	0.946334	0.999837	Not Sig	nonsignificant	.	.	ectonucleoside triphosphate diphosphohydrolase 6 [Source:RGD Symbol;Acc:619725]
LOC120094652	chr9	42	23	51.0124	64.9124	-13.9	0.785865	0.126001	0.787567	NotSig	-0.406169	small	84.1634	78.6017	89.7251	0.188348	0.784507	1.14152	0.432743	0.999837	Not Sig	nonsignificant	.	.
Ugp2	chr14	123	98	79.2359	71.3534	7.8825	1.11047	0.126529	0.788862	NotSig	0.177266	negligible	31.1959	31.5548	30.8369	0.275244	-0.218939	0.97725	0.826697	0.999837	Not Sig	nonsignificant	.	.	UDP-glucose pyrophosphorylase 2 [Source:RGD Symbol;Acc:1310210]
Prpf40a	chr3	56	43	95.7424	74.2128	21.5297	1.29011	0.126415	0.788862	NotSig	0.286117	small	8.78009	8.68302	8.87716	0.512421	-0.104478	1.02236	0.91679	0.999837	Not Sig	nonsignificant	.	Y	pre-mRNA processing factor 40 homolog A [Source:RGD Symbol;Acc:1311401]
Mrpl51	chr4	71	52	84.3513	102.612	-18.261	0.822039	0.126436	0.788862	NotSig	-0.319119	small	8.48591	8.47271	8.4991	0.560084	0.118148	1.00311	0.905951	0.999837	Not Sig	nonsignificant	Y	Y	mitochondrial ribosomal protein L51 [Source:RGD Symbol;Acc:1306686]
Srsf1	chr10	143	109	100.312	81.399	18.9127	1.23235	0.126692	0.788877	NotSig	0.19824	negligible	6.14011	7.50932	4.7709	0.610136	-0.970425	0.635331	0.331835	0.999837	Not Sig	nonsignificant	Y	Y	serine and arginine rich splicing factor 1 [Source:RGD Symbol;Acc:1587490]
Rn5-8s	chrUn_NW_023637849v1	213	178	6.35068	7.15613	-0.805451	0.887446	0.126628	0.788877	NotSig	-0.140729	negligible	207.188	210.664	203.711	0.541154	-0.0970142	0.966992	0.922715	0.999837	Not Sig	nonsignificant	.	.	5.8S ribosomal RNA [Source:RGD Symbol;Acc:5687331]
Btg3	chr11	109	68	104.598	96.1832	8.41485	1.08749	0.127741	0.788942	NotSig	0.232605	small	22.7082	20.2173	25.1991	0.351801	0.948627	1.24641	0.34281	0.999837	Not Sig	nonsignificant	.	Y	BTG anti-proliferation factor 3 [Source:RGD Symbol;Acc:2226]
Gak	chr14	97	81	105.084	87.9933	17.091	1.19423	0.1273	0.788942	NotSig	0.250357	small	22.8976	22.5256	23.2697	0.324631	-0.0723277	1.03304	0.942341	0.999837	Not Sig	nonsignificant	.	.	cyclin G associated kinase [Source:RGD Symbol;Acc:621589]
Synpo	chr18	366	140	82.4312	75.5262	6.90503	1.09143	0.127136	0.788942	NotSig	0.158014	negligible	14.4904	8.03013	20.9506	0.607645	2.54804	2.609	0.010833	0.581197	Not Sig	nonsignificant	.	.	synaptopodin [Source:RGD Symbol;Acc:620668]
Ppp1r16b	chr3	218	167	83.3052	69.9557	13.3495	1.19083	0.12743	0.788942	NotSig	0.126039	negligible	15.13	16.9086	13.3513	0.460817	-0.4598	0.789611	0.64566	0.999837	Not Sig	nonsignificant	.	.	protein phosphatase 1, regulatory subunit 16B [Source:RGD Symbol;Acc:1589460]
Slc2a1	chr5	318	182	105.118	96.1026	9.01533	1.09381	0.127418	0.788942	NotSig	0.143902	negligible	60.412	51.7859	69.0381	0.261897	1.60773	1.33314	0.107893	0.999837	Not Sig	nonsignificant	.	.	solute carrier family 2 member 1 [Source:RGD Symbol;Acc:3704]
Prkcz	chr5	242	160	84.1102	94.4755	-10.3653	0.890286	0.127906	0.788942	NotSig	-0.131165	negligible	36.1884	33.6933	38.6835	0.265234	0.760101	1.14811	0.447194	0.999837	Not Sig	nonsignificant	.	Y	protein kinase C, zeta [Source:RGD Symbol;Acc:3399]
Cipc	chr6	62	73	98.3018	78.7269	19.5749	1.24864	0.127669	0.788942	NotSig	0.12712	negligible	10.5709	12.6282	8.51359	0.463712	-1.29842	0.674173	0.194142	0.999837	Not Sig	nonsignificant	.	.	CLOCK-interacting pacemaker [Source:RGD Symbol;Acc:1309492]
Ubl7	chr8	251	193	78.5454	72.9251	5.62024	1.07707	0.127612	0.788942	NotSig	0.105144	negligible	58.0615	57.0349	59.088	0.227569	0.190848	1.036	0.848644	0.999837	Not Sig	nonsignificant	.	.	ubiquitin-like 7 [Source:RGD Symbol;Acc:1303055]
Gkap1	chr17	20	21	55.579	89.5464	-33.9674	0.620672	0.127043	0.788942	NotSig	-0.445142	small	5.93752	6.38855	5.4865	0.610592	-0.483031	0.858803	0.629074	0.999837	Not Sig	nonsignificant	.	.	G kinase anchoring protein 1 [Source:RGD Symbol;Acc:1306955]
Tango2	chr11	129	94	103.112	117.381	-14.2688	0.87844	0.128584	0.789349	NotSig	-0.21168	small	28.3531	26.4886	30.2175	0.313048	0.613967	1.14077	0.539237	0.999837	Not Sig	nonsignificant	.	.	transport and golgi organization 2 homolog [Source:RGD Symbol;Acc:1310348]
Ppp2r5a	chr13	88	52	91.7478	79.3431	12.4047	1.15634	0.128443	0.789349	NotSig	0.257482	small	17.75	15.5631	19.9368	0.381621	0.804286	1.28103	0.421232	0.999837	Not Sig	nonsignificant	.	.	protein phosphatase 2, regulatory subunit B', alpha [Source:RGD Symbol;Acc:1308022]
Mtmr12	chr2	77	63	93.7653	108.924	-15.159	0.86083	0.128898	0.789349	NotSig	-0.256211	small	10.3313	9.19734	11.4653	0.505809	0.36641	1.24659	0.71406	0.999837	Not Sig	nonsignificant	Y	.	myotubularin related protein 12 [Source:RGD Symbol;Acc:1307902]
Psmd14	chr3	172	100	74.4252	61.4741	12.951	1.21067	0.128426	0.789349	NotSig	0.16122	negligible	38.3853	32.9007	43.87	0.26766	1.53767	1.33341	0.12413	0.999837	Not Sig	nonsignificant	.	Y	proteasome 26S subunit, non-ATPase 14 [Source:RGD Symbol;Acc:1594532]
Mturn	chr4	146	120	120.357	109.94	10.417	1.09475	0.128305	0.789349	NotSig	0.159795	negligible	16.9163	18.2127	15.6199	0.370558	-0.708727	0.857637	0.478494	0.999837	Not Sig	nonsignificant	.	.	maturin, neural progenitor differentiation regulator homolog [Source:RGD Symbol;Acc:1549700]
Scn8a	chr7	225	153	107.178	119.342	-12.1636	0.898078	0.128728	0.789349	NotSig	-0.159855	negligible	6.59261	6.64902	6.5362	0.602173	0.0943312	0.983032	0.924846	0.999837	Not Sig	nonsignificant	.	Y	sodium voltage-gated channel alpha subunit 8 [Source:RGD Symbol;Acc:3638]
Micos13	chr9	374	308	82.6062	88.9958	-6.38962	0.928203	0.128795	0.789349	NotSig	-0.109117	negligible	92.5779	95.0529	90.1029	0.184403	-0.343909	0.947924	0.730914	0.999837	Not Sig	nonsignificant	.	.	mitochondrial contact site and cristae organizing system subunit 13 [Source:RGD Symbol;Acc:1588578]
Sacm1l	chr8	58	47	105.503	83.596	21.9073	1.26206	0.128283	0.789349	NotSig	0.302324	small	12.4543	15.1659	9.74265	0.439027	-1.40102	0.642404	0.161209	0.999837	Not Sig	nonsignificant	.	.	SAC1 like phosphatidylinositide phosphatase [Source:RGD Symbol;Acc:69223]
Eif2s1	chr6	90	66	74.9777	89.568	-14.5903	0.837104	0.129157	0.790215	NotSig	-0.258799	small	20.9419	20.0423	21.8414	0.335782	0.318633	1.08976	0.750005	0.999837	Not Sig	nonsignificant	.	.	eukaryotic translation initiation factor 2 subunit alpha [Source:RGD Symbol;Acc:620963]
Stim1	chr1	123	101	98.9163	117.032	-18.1158	0.845206	0.13038	0.79144	NotSig	-0.170144	negligible	22.5385	23.7169	21.3601	0.383905	-0.248659	0.900626	0.803625	0.999837	Not Sig	nonsignificant	.	.	stromal interaction molecule 1 [Source:RGD Symbol;Acc:1306831]
Srp68	chr10	88	84	79.5511	96.4926	-16.9415	0.824427	0.132152	0.79144	NotSig	-0.248308	small	20.6342	21.2167	20.0517	0.356382	-0.271377	0.945087	0.786101	0.999837	Not Sig	nonsignificant	.	.	signal recognition particle 68 [Source:RGD Symbol;Acc:1305376]
Tfb2m	chr13	45	39	82.6326	103.991	-21.3582	0.794614	0.13185	0.79144	NotSig	-0.32092	small	11.5802	13.148	10.0125	0.511521	-0.354012	0.761523	0.72333	0.999837	Not Sig	nonsignificant	.	.	transcription factor B2, mitochondrial [Source:RGD Symbol;Acc:1307091]
Zmat5	chr14	34	25	91.5698	118.029	-26.4594	0.775823	0.13073	0.79144	NotSig	-0.450655	small	7.40577	7.00731	7.80424	0.585252	0.164319	1.11373	0.86948	0.999837	Not Sig	nonsignificant	.	.	zinc finger, matrin type 5 [Source:RGD Symbol;Acc:1559774]
Zmym2	chr15	88	85	98.7934	81.4665	17.327	1.21269	0.130871	0.79144	NotSig	0.213025	small	14.0587	14.9834	13.134	0.412665	-0.676702	0.87657	0.498595	0.999837	Not Sig	nonsignificant	.	Y	zinc finger MYM-type containing 2 [Source:RGD Symbol;Acc:1593255]
Nalcn	chr15	126	94	93.3553	109.701	-16.3458	0.850997	0.132532	0.79144	NotSig	-0.184659	negligible	23.3458	24.3472	22.3445	0.33224	-0.217113	0.917747	0.828121	0.999837	Not Sig	nonsignificant	Y	.	sodium leak channel, non-selective [Source:RGD Symbol;Acc:628710]
Ccdc124	chr16	162	99	104.623	96.3597	8.26339	1.08576	0.129752	0.79144	NotSig	0.113397	negligible	32.602	29.3267	35.8774	0.274824	1.21996	1.22337	0.222479	0.999837	Not Sig	nonsignificant	.	.	coiled-coil domain containing 124 [Source:RGD Symbol;Acc:1310931]
Gas6	chr16	121	118	81.6596	94.3649	-12.7053	0.86536	0.131946	0.79144	NotSig	-0.163511	negligible	32.8317	36.2673	29.3962	0.269642	-1.03162	0.810545	0.302249	0.999837	Not Sig	nonsignificant	.	.	growth arrest specific 6 [Source:RGD Symbol;Acc:61913]
Smim15	chr2	53	36	59.2813	87.2762	-27.9949	0.679238	0.130223	0.79144	NotSig	-0.21249	small	9.1349	8.88393	9.38587	0.512874	0.229534	1.0565	0.818454	0.999837	Not Sig	nonsignificant	.	Y	small integral membrane protein 15 [Source:RGD Symbol;Acc:2324600]
Gstm7	chr2	548	385	80.135	87.4715	-7.33657	0.916126	0.129812	0.79144	NotSig	-0.104698	negligible	124.911	117.498	132.324	0.169783	1.00468	1.12618	0.31505	0.999837	Not Sig	nonsignificant	.	.	glutathione S-transferase, mu 7 [Source:RGD Symbol;Acc:621287]
Pofut2	chr20	64	45	91.7157	103.854	-12.1386	0.883119	0.132352	0.79144	NotSig	-0.396589	small	14.6246	13.8128	15.4364	0.422821	0.571079	1.11754	0.567946	0.999837	Not Sig	nonsignificant	.	.	protein O-fucosyltransferase 2 [Source:RGD Symbol;Acc:1307334]
Ascc1	chr20	29	21	113.6	87.8585	25.7413	1.29299	0.132577	0.79144	NotSig	0.390404	small	7.04797	7.36227	6.73368	0.57431	-0.4035	0.914619	0.68658	0.999837	Not Sig	nonsignificant	.	.	activating signal cointegrator 1 complex subunit 1 [Source:RGD Symbol;Acc:1359255]
Ddx50	chr20	47	36	58.5758	78.1724	-19.5967	0.749315	0.131803	0.79144	NotSig	-0.355821	small	9.89004	8.72206	11.058	0.496647	0.596868	1.26782	0.550596	0.999837	Not Sig	nonsignificant	.	.	DExD-box helicase 50 [Source:RGD Symbol;Acc:1310934]
Lrrc8a	chr3	67	59	93.1315	114.206	-21.0745	0.815469	0.130832	0.79144	NotSig	-0.305417	small	9.21765	9.74926	8.68604	0.517228	-0.206831	0.890943	0.836142	0.999837	Not Sig	nonsignificant	.	.	leucine rich repeat containing 8 VRAC subunit A [Source:RGD Symbol;Acc:1311690]
Map1a	chr3	671	523	88.1362	91.5389	-3.40274	0.962827	0.131276	0.79144	NotSig	-0.0772246	negligible	87.7675	80.1595	95.3755	0.197643	1.0526	1.18982	0.292524	0.999837	Not Sig	nonsignificant	.	Y	microtubule-associated protein 1A [Source:RGD Symbol;Acc:3042]
Vhl	chr4	113	58	119.07	105.471	13.599	1.12894	0.1317	0.79144	NotSig	0.252619	small	16.7187	13.1587	20.2788	0.403106	1.67633	1.5411	0.0936734	0.999837	Not Sig	nonsignificant	Y	Y	von Hippel-Lindau tumor suppressor [Source:RGD Symbol;Acc:3960]
Hmgn2	chr5	291	232	99.9996	106.096	-6.09591	0.942543	0.131281	0.79144	NotSig	-0.151484	negligible	60.9653	60.3251	61.6055	0.239716	-0.0813339	1.02123	0.935176	0.999837	Not Sig	nonsignificant	.	.	high mobility group nucleosomal binding domain 2 [Source:RGD Symbol;Acc:620649]
Pacs2	chr6	150	93	97.997	112.804	-14.8072	0.868736	0.130653	0.79144	NotSig	-0.177806	negligible	15.0455	13.9979	16.093	0.442834	0.652149	1.14967	0.514305	0.999837	Not Sig	nonsignificant	Y	.	phosphofurin acidic cluster sorting protein 2 [Source:RGD Symbol;Acc:1597262]
Tmem121	chr6	27	35	57.8918	81.5522	-23.6604	0.709874	0.132313	0.79144	NotSig	-0.362967	small	6.24052	7.29821	5.18282	0.59585	-0.848406	0.71015	0.396212	0.999837	Not Sig	nonsignificant	.	Y	transmembrane protein 121 [Source:RGD Symbol;Acc:1597216]
Emc2	chr7	103	98	81.746	96.5146	-14.7686	0.846981	0.129756	0.79144	NotSig	-0.267274	small	25.5736	28.7945	22.3527	0.306336	-1.12032	0.776284	0.262577	0.999837	Not Sig	nonsignificant	.	.	ER membrane protein complex subunit 2 [Source:RGD Symbol;Acc:1310430]
Eny2	chr7	140	96	102.291	85.4026	16.8884	1.19775	0.132256	0.79144	NotSig	0.16912	negligible	15.0051	13.144	16.8662	0.39766	0.818728	1.28319	0.412942	0.999837	Not Sig	nonsignificant	.	Y	ENY2, transcription and export complex 2 subunit [Source:RGD Symbol;Acc:1596439]
Atp5mg	chr8	1007	775	82.989	86.4946	-3.50565	0.95947	0.132111	0.79144	NotSig	-0.0796274	negligible	231.663	226.929	236.398	0.129793	0.425888	1.04173	0.67019	0.999837	Not Sig	nonsignificant	.	.	ATP synthase membrane subunit g [Source:RGD Symbol;Acc:1303259]
Mrap2	chr8	51	27	92.1999	74.2255	17.9744	1.24216	0.130376	0.79144	NotSig	0.391082	small	6.10444	3.93564	8.27323	0.649852	1.65995	2.10213	0.096925	0.999837	Not Sig	nonsignificant	.	.	melanocortin 2 receptor accessory protein 2 [Source:RGD Symbol;Acc:1309873]
Vma21	chrX	105	100	90.4781	104.254	-13.7763	0.867859	0.130181	0.79144	NotSig	-0.156134	negligible	16.2484	18.5172	13.9795	0.399431	-0.92159	0.754944	0.356743	0.999837	Not Sig	nonsignificant	Y	Y	vacuolar ATPase assembly factor VMA21 [Source:RGD Symbol;Acc:1566155]
Znrd2	chr1	88	52	79.235	65.7246	13.5105	1.20556	0.130073	0.79144	NotSig	0.267542	small	16.2835	14.3852	18.1819	0.373373	0.805382	1.26393	0.420599	0.999837	Not Sig	nonsignificant	.	.	zinc ribbon domain containing 2 [Source:RGD Symbol;Acc:1593467]
Arhgap23	chr10	83	70	107.965	117.928	-9.96356	0.915512	0.131328	0.79144	NotSig	-0.215825	small	9.15964	11.771	6.54831	0.559764	-1.33466	0.55631	0.181987	0.999837	Not Sig	nonsignificant	.	.	Rho GTPase activating protein 23 [Source:RGD Symbol;Acc:1309742]
LOC683674	chr12	42	41	85.3912	66.6421	18.7491	1.28134	0.131662	0.79144	NotSig	0.371141	small	10.4968	12.103	8.8905	0.521312	-0.924655	0.73457	0.355146	0.999837	Not Sig	nonsignificant	Y	.
Ppp2r1a	chr1	886	667	97.1618	103.473	-6.31075	0.93901	0.134101	0.79206	NotSig	-0.0554358	negligible	214.339	211.579	217.099	0.142696	0.251653	1.02609	0.801309	0.999837	Not Sig	nonsignificant	.	.	protein phosphatase 2 scaffold subunit A alpha [Source:RGD Symbol;Acc:620907]
Htra1	chr1	276	231	86.4285	80.9231	5.50539	1.06803	0.13294	0.79206	NotSig	0.138846	negligible	63.1361	64.9692	61.3031	0.21232	-0.357786	0.943572	0.720504	0.999837	Not Sig	nonsignificant	.	.	HtrA serine peptidase 1 [Source:RGD Symbol;Acc:69235]
Mrpl49	chr1	121	120	85.0689	95.7596	-10.6907	0.888359	0.133452	0.79206	NotSig	-0.228202	small	18.3541	20.3261	16.382	0.381709	-0.580472	0.80596	0.561597	0.999837	Not Sig	nonsignificant	.	.	mitochondrial ribosomal protein L49 [Source:RGD Symbol;Acc:1309920]
Tmem97	chr10	33	24	82.3337	110.221	-27.8872	0.746988	0.134832	0.79206	NotSig	-0.478007	small	6.97034	5.68999	8.25069	0.570571	0.80036	1.45004	0.423502	0.999837	Not Sig	nonsignificant	.	.	transmembrane protein 97 [Source:RGD Symbol;Acc:1307423]
Ap2m1	chr11	1092	855	94.8003	98.0295	-3.22912	0.96706	0.135176	0.79206	NotSig	-0.0636661	negligible	264.289	267.224	261.354	0.164544	-0.197458	0.978034	0.843469	0.999837	Not Sig	nonsignificant	.	Y	adaptor related protein complex 2 subunit mu 1 [Source:RGD Symbol;Acc:620135]
Tmem130	chr12	758	553	78.743	84.8026	-6.05963	0.928544	0.134684	0.79206	NotSig	-0.0906704	negligible	135.273	131.228	139.317	0.163646	0.323916	1.06165	0.746001	0.999837	Not Sig	nonsignificant	.	.	transmembrane protein 130 [Source:RGD Symbol;Acc:1563248]
Pitpnm2	chr12	320	218	105.607	94.7857	10.8209	1.11416	0.133565	0.79206	NotSig	0.0999708	negligible	37.3838	35.8256	38.942	0.326352	0.368269	1.08699	0.712673	0.999837	Not Sig	nonsignificant	.	.	phosphatidylinositol transfer protein, membrane-associated 2 [Source:RGD Symbol;Acc:1310867]
Actr3	chr13	431	298	71.701	79.0962	-7.39522	0.906503	0.133034	0.79206	NotSig	-0.17203	negligible	87.8456	80.5962	95.0949	0.199487	0.919614	1.17989	0.357774	0.999837	Not Sig	nonsignificant	.	Y	actin related protein 3 [Source:RGD Symbol;Acc:71024]
Ube2k	chr14	234	196	93.113	83.4749	9.63812	1.11546	0.133848	0.79206	NotSig	0.114241	negligible	31.5133	34.3615	28.6652	0.276555	-0.898536	0.834223	0.3689	0.999837	Not Sig	nonsignificant	.	Y	ubiquitin-conjugating enzyme E2K [Source:RGD Symbol;Acc:1311626]
Ilrun	chr20	261	188	75.9781	66.1634	9.81476	1.14834	0.134987	0.79206	NotSig	0.102707	negligible	25.9518	27.6846	24.2191	0.367955	-0.407375	0.874825	0.683733	0.999837	Not Sig	nonsignificant	.	.	inflammation and lipid regulator with UBA-like and NBR1-like domains [Source:RGD Symbol;Acc:1559829]
Ptpra	chr3	233	213	90.9359	99.8188	-8.88284	0.91101	0.133413	0.79206	NotSig	-0.10148	negligible	60.6096	65.6052	55.614	0.211682	-1.08307	0.847708	0.278779	0.999837	Not Sig	nonsignificant	.	Y	protein tyrosine phosphatase, receptor type, A [Source:RGD Symbol;Acc:3450]
Kcna1	chr4	179	132	81.0651	87.0056	-5.94044	0.931723	0.134163	0.79206	NotSig	-0.192385	negligible	9.14555	8.13256	10.1585	0.496577	0.635575	1.24912	0.525053	0.999837	Not Sig	nonsignificant	.	Y	potassium voltage-gated channel subfamily A member 1 [Source:RGD Symbol;Acc:2949]
Eif2b2	chr6	75	47	90.8518	78.7859	12.0659	1.15315	0.133761	0.79206	NotSig	0.301802	small	15.3225	14.2095	16.4354	0.400266	0.567907	1.15665	0.570098	0.999837	Not Sig	nonsignificant	.	.	eukaryotic translation initiation factor 2B subunit beta [Source:RGD Symbol;Acc:620820]
Sirt6	chr7	34	35	102.567	63.5228	39.0446	1.61465	0.133508	0.79206	NotSig	0.415977	small	7.73116	8.02099	7.44134	0.546346	-0.372491	0.927733	0.709527	0.999837	Not Sig	nonsignificant	.	.	sirtuin 6 [Source:RGD Symbol;Acc:1305216]
Agap2	chr7	1088	801	102.695	98.2179	4.47764	1.04559	0.13295	0.79206	NotSig	0.0493999	negligible	95.6829	92.2376	99.1281	0.190939	0.544784	1.0747	0.585902	0.999837	Not Sig	nonsignificant	.	.	ArfGAP with GTPase domain, ankyrin repeat and PH domain 2 [Source:RGD Symbol;Acc:628844]
Vps28	chr7	237	154	91.0258	101.318	-10.2918	0.89842	0.134282	0.79206	NotSig	-0.170379	negligible	51.5461	47.4198	55.6724	0.220534	1.09029	1.17403	0.275586	0.999837	Not Sig	nonsignificant	.	.	VPS28 subunit of ESCRT-I [Source:RGD Symbol;Acc:1306537]
Ift46	chr8	57	50	69.315	91.1273	-21.8123	0.760639	0.133953	0.79206	NotSig	-0.341457	small	13.7386	14.804	12.6733	0.414181	-0.51354	0.856074	0.607574	0.999837	Not Sig	nonsignificant	.	.	intraflagellar transport 46 [Source:RGD Symbol;Acc:1307682]
Cdk5r2	chr9	235	165	80.9147	68.0325	12.8822	1.18935	0.13462	0.79206	NotSig	0.144749	negligible	28.0995	24.3639	31.8351	0.309138	1.02659	1.30665	0.304612	0.999837	Not Sig	nonsignificant	.	.	cyclin-dependent kinase 5 regulatory subunit 2 [Source:RGD Symbol;Acc:1562530]
Slc25a28	chr1	67	51	117.125	91.0583	26.0662	1.28626	0.135179	0.79206	NotSig	0.298157	small	14.0757	13.158	14.9935	0.426467	0.278708	1.13949	0.780469	0.999837	Not Sig	nonsignificant	.	.	solute carrier family 25 member 28 [Source:RGD Symbol;Acc:1584155]
Slc2a8	chr3	58	37	116.661	80.992	35.669	1.4404	0.134662	0.79206	NotSig	0.165039	negligible	12.1557	11.5678	12.7436	0.440035	0.26399	1.10165	0.791787	0.999837	Not Sig	nonsignificant	.	.	solute carrier family 2 member 8 [Source:RGD Symbol;Acc:620611]
Psd	chr1	781	619	117.883	124.533	-6.6504	0.946597	0.13536	0.792459	NotSig	-0.069162	negligible	146.889	138.197	155.581	0.191809	0.678486	1.12579	0.497464	0.999837	Not Sig	nonsignificant	.	.	pleckstrin and Sec7 domain containing [Source:RGD Symbol;Acc:620297]
Noct	chr2	55	42	87.7037	59.7273	27.9764	1.4684	0.135527	0.792459	NotSig	0.309094	small	9.48525	9.83939	9.13112	0.501604	-0.0848076	0.928017	0.932414	0.999837	Not Sig	nonsignificant	.	.	nocturnin [Source:RGD Symbol;Acc:1587344]
Wdr82	chr8	185	181	103.158	93.2266	9.93174	1.10653	0.135523	0.792459	NotSig	0.160197	negligible	35.9089	42.3313	29.4865	0.275998	-1.7735	0.696565	0.0761461	0.999837	Not Sig	nonsignificant	.	Y	WD repeat domain 82 [Source:RGD Symbol;Acc:1584269]
Ppp4r3b	chr14	47	57	108.614	78.5021	30.1119	1.38358	0.135569	0.792459	NotSig	0.303495	small	8.34792	9.84216	6.85369	0.527568	-1.08106	0.69636	0.279669	0.999837	Not Sig	nonsignificant	.	Y	protein phosphatase 4, regulatory subunit 3B [Source:RGD Symbol;Acc:1309450]
Ndufa13-ps1	chr7	20	18	67.3216	50.4858	16.8357	1.33347	0.135726	0.792746	NotSig	0.499574	small	22.5821	19.6898	25.4745	0.348224	1.07461	1.29379	0.282547	0.999837	Not Sig	nonsignificant	.	.
Dgcr2	chr11	137	94	101.238	111.829	-10.5906	0.905296	0.136195	0.793113	NotSig	-0.197989	negligible	18.203	17.3479	19.0581	0.351155	0.244266	1.09858	0.807025	0.999837	Not Sig	nonsignificant	.	.	DiGeorge syndrome critical region gene 2 [Source:RGD Symbol;Acc:1310567]
Selenok	chr16	238	206	87.7513	77.7738	9.97748	1.12829	0.136132	0.793113	NotSig	0.108118	negligible	51.5706	54.4463	48.6948	0.223078	-0.725808	0.894363	0.467956	0.999837	Not Sig	nonsignificant	.	Y	selenoprotein K [Source:RGD Symbol;Acc:1303129]
Tfe3	chrX	37	28	73.4475	94.7645	-21.317	0.775053	0.136078	0.793113	NotSig	-0.336326	small	6.74457	6.80043	6.68872	0.593137	0.238844	0.983573	0.811227	0.999837	Not Sig	nonsignificant	.	.	transcription factor binding to IGHM enhancer 3 [Source:RGD Symbol;Acc:1559642]
Rbm28	chr4	32	28	79.9255	113.942	-34.0165	0.701457	0.136421	0.793665	NotSig	-0.416014	small	7.99817	8.58521	7.41112	0.524686	-0.373436	0.863243	0.708824	0.999837	Not Sig	nonsignificant	.	.	RNA binding motif protein 28 [Source:RGD Symbol;Acc:1311336]
Canx	chr10	587	452	92.3723	98.9772	-6.6049	0.933269	0.136985	0.795064	NotSig	-0.113641	negligible	96.0509	97.9206	94.1813	0.183282	-0.457898	0.961813	0.647026	0.999837	Not Sig	nonsignificant	Y	Y	calnexin [Source:RGD Symbol;Acc:2266]
Pfdn2	chr13	236	183	62.7559	56.313	6.44285	1.11441	0.136829	0.795064	NotSig	0.109249	negligible	27.1756	29.6896	24.6616	0.333275	-1.01198	0.830648	0.311549	0.999837	Not Sig	nonsignificant	.	.	prefoldin subunit 2 [Source:RGD Symbol;Acc:1591406]
LOC103691939	chr3	13	13	91.6975	116.284	-24.5863	0.788567	0.136766	0.795064	NotSig	-0.71828	medium	24.1927	21.9167	26.4687	0.361215	1.0192	1.20769	0.308109	0.999837	Not Sig	nonsignificant	.	.
Eci1	chr10	30	35	66.2061	89.4215	-23.2153	0.740383	0.136975	0.795064	NotSig	-0.410686	small	8.44316	10.6236	6.26275	0.545292	-1.20668	0.589515	0.227556	0.999837	Not Sig	nonsignificant	.	.	enoyl-CoA delta isomerase 1 [Source:RGD Symbol;Acc:61892]
Akap7	chr1	46	60	97.3927	81.4022	15.9905	1.19644	0.139107	0.795345	NotSig	0.271805	small	13.1773	15.3875	10.9672	0.438559	-1.04932	0.712735	0.29403	0.999837	Not Sig	nonsignificant	.	.	A-kinase anchoring protein 7 [Source:RGD Symbol;Acc:1303071]
Tsen34	chr1	110	102	81.336	91.1241	-9.78808	0.892585	0.137949	0.795345	NotSig	-0.198145	negligible	27.8607	28.3005	27.4209	0.29467	-0.201515	0.968919	0.840296	0.999837	Not Sig	nonsignificant	.	.	tRNA splicing endonuclease subunit 34 [Source:RGD Symbol;Acc:1359564]
Atp1a3	chr1	1866	1401	104.227	106.728	-2.50109	0.976566	0.139117	0.795345	NotSig	-0.0390812	negligible	445.172	450.164	440.18	0.320336	-0.100713	0.977822	0.919778	0.999837	Not Sig	nonsignificant	.	Y	ATPase Na+/K+ transporting subunit alpha 3 [Source:RGD Symbol;Acc:2169]
Eif3k	chr1	232	191	71.6511	80.2249	-8.5738	0.893128	0.139795	0.795345	NotSig	-0.132613	negligible	52.5955	53.0728	52.1182	0.230944	-0.170626	0.982014	0.864518	0.999837	Not Sig	nonsignificant	.	.	eukaryotic translation initiation factor 3, subunit K [Source:RGD Symbol;Acc:1309221]
Gtf2h1	chr1	49	34	79.5285	112.251	-32.7228	0.708486	0.137175	0.795345	NotSig	-0.324943	small	12.0984	12.3606	11.8362	0.43629	0.102279	0.957576	0.918535	0.999837	Not Sig	nonsignificant	.	.	general transcription factor IIH subunit 1 [Source:RGD Symbol;Acc:1308225]
Kcnj6	chr11	162	94	94.702	83.9675	10.7345	1.12784	0.140836	0.795345	NotSig	0.148397	negligible	13.378	13.1491	13.6068	0.423869	0.313212	1.03481	0.75412	0.999837	Not Sig	nonsignificant	Y	Y	potassium inwardly-rectifying channel, subfamily J, member 6 [Source:RGD Symbol;Acc:2959]
Timm17a	chr13	122	119	79.292	93.1195	-13.8274	0.851509	0.138274	0.795345	NotSig	-0.196404	negligible	32.6288	39.0776	26.18	0.285459	-1.84826	0.669947	0.0645649	0.999837	Not Sig	nonsignificant	.	.	translocase of inner mitochondrial membrane 17A [Source:RGD Symbol;Acc:3862]
LOC100360316	chr16	51	37	77.4946	102.707	-25.2121	0.754523	0.140173	0.795345	NotSig	-0.226814	small	12.3126	11.1541	13.4711	0.44239	0.597825	1.20773	0.549957	0.999837	Not Sig	nonsignificant	.	.
RGD1566359	chr17	148	104	90.2004	109.998	-19.7976	0.820019	0.139849	0.795345	NotSig	-0.158435	negligible	13.5279	10.7467	16.3092	0.497463	0.933615	1.5176	0.350503	0.999837	Not Sig	nonsignificant	.	Y	similar to RIKEN cDNA B230219D22 [Source:RGD Symbol;Acc:1566359]
Anapc2	chr3	93	98	76.0506	89.6974	-13.6468	0.847858	0.14073	0.795345	NotSig	-0.257983	small	28.0484	32.8103	23.2865	0.295134	-1.45852	0.709732	0.144698	0.999837	Not Sig	nonsignificant	.	.	anaphase promoting complex subunit 2 [Source:RGD Symbol;Acc:1305546]
Odf2	chr3	38	27	98.3602	76.2158	22.1444	1.29055	0.137718	0.795345	NotSig	0.417503	small	7.12907	7.02821	7.22993	0.567582	-0.0269506	1.0287	0.978499	0.999837	Not Sig	nonsignificant	.	.	outer dense fiber of sperm tails 2 [Source:RGD Symbol;Acc:3229]
Bpnt2	chr5	177	137	91.6953	103.363	-11.668	0.887116	0.139623	0.795345	NotSig	-0.174084	negligible	13.3702	13.6791	13.0613	0.467039	-0.313696	0.954838	0.753752	0.999837	Not Sig	nonsignificant	Y	Y	3'(2'), 5'-bisphosphate nucleotidase 2 [Source:RGD Symbol;Acc:1306455]
Nudt2	chr5	73	67	75.3242	84.9543	-9.63008	0.886644	0.139177	0.795345	NotSig	-0.280104	small	17.4481	18.6514	16.2448	0.371974	-0.556218	0.870968	0.578062	0.999837	Not Sig	nonsignificant	.	.	nudix hydrolase 2 [Source:RGD Symbol;Acc:1303023]
Map7d1	chr5	343	202	90.0562	83.3769	6.67932	1.08011	0.140721	0.795345	NotSig	0.15915	negligible	66.0248	58.3715	73.678	0.213888	1.49907	1.26223	0.133857	0.999837	Not Sig	nonsignificant	.	.	MAP7 domain containing 1 [Source:RGD Symbol;Acc:1597986]
Snx17	chr6	141	103	82.6664	94.3719	-11.7055	0.875964	0.138073	0.795345	NotSig	-0.217048	small	33.3829	33.1317	33.6341	0.277369	0.0131248	1.01516	0.989528	0.999837	Not Sig	nonsignificant	.	.	sorting nexin 17 [Source:RGD Symbol;Acc:1306424]
Tmem263	chr7	66	48	83.9421	101.841	-17.8986	0.824249	0.139428	0.795345	NotSig	-0.286324	small	8.49427	8.89333	8.09522	0.518642	-0.211128	0.910257	0.832788	0.999837	Not Sig	nonsignificant	Y	Y	transmembrane protein 263 [Source:RGD Symbol;Acc:1563325]
Hsp90b1	chr7	480	295	86.6851	78.7795	7.90562	1.10035	0.137417	0.795345	NotSig	0.154111	negligible	104.6	89.2954	119.904	0.193097	1.97205	1.34278	0.0486035	0.999837	Not Sig	nonsignificant	.	.	heat shock protein 90 beta family member 1 [Source:RGD Symbol;Acc:1310482]
Slc6a15	chr7	130	77	86.8886	101.274	-14.385	0.857959	0.140456	0.795345	NotSig	-0.178727	negligible	26.4042	24.0229	28.7856	0.303859	0.858022	1.19826	0.390881	0.999837	Not Sig	nonsignificant	.	.	solute carrier family 6 member 15 [Source:RGD Symbol;Acc:628664]
Mbd6	chr7	23	20	94.6882	120.56	-25.8718	0.785403	0.140671	0.795345	NotSig	-0.439497	small	6.14305	7.46007	4.82603	0.607726	-0.926532	0.646915	0.354169	0.999837	Not Sig	nonsignificant	.	Y	methyl-CpG binding domain protein 6 [Source:RGD Symbol;Acc:1311050]
LOC108351584	chr7	34	16	83.0354	53.6374	29.398	1.54809	0.139743	0.795345	NotSig	0.551388	medium	6.26968	4.29049	8.24887	0.633318	1.25359	1.92259	0.20999	0.999837	Not Sig	nonsignificant	.	.	uncharacterized LOC108351584 [Source:RGD Symbol;Acc:11406985]
Manf	chr8	119	102	85.1513	95.3894	-10.2381	0.892671	0.137921	0.795345	NotSig	-0.194135	negligible	25.7678	24.7619	26.7737	0.312352	0.211298	1.08125	0.832654	0.999837	Not Sig	nonsignificant	.	Y	mesencephalic astrocyte-derived neurotrophic factor [Source:RGD Symbol;Acc:1307252]
Fam117b	chr9	117	97	75.039	92.3929	-17.3539	0.812173	0.139081	0.795345	NotSig	-0.164637	negligible	12.8235	15.1528	10.4941	0.416221	-1.27639	0.692552	0.201819	0.999837	Not Sig	nonsignificant	Y	Y	family with sequence similarity 117, member B [Source:RGD Symbol;Acc:1307676]
Gart	chr11	55	56	86.496	105.291	-18.7948	0.821496	0.140303	0.795345	NotSig	-0.327923	small	14.359	15.2514	13.4666	0.405454	-0.508998	0.88297	0.610754	0.999837	Not Sig	nonsignificant	Y	Y	phosphoribosylglycinamide formyltransferase, phosphoribosylglycinamide synthetase, phosphoribosylaminoimidazole synthetase [Source:RGD Symbol;Acc:1308717]
Sorcs2	chr14	59	29	98.6616	115.732	-17.0707	0.852498	0.139376	0.795345	NotSig	-0.318911	small	6.01239	5.18718	6.8376	0.618936	0.613944	1.31817	0.539252	0.999837	Not Sig	nonsignificant	.	.	sortilin-related VPS10 domain containing receptor 2 [Source:RGD Symbol;Acc:1310621]
Bmp1	chr15	20	19	79.2441	113.584	-34.3403	0.697667	0.140039	0.795345	NotSig	-0.346828	small	6.64531	7.21761	6.07302	0.647163	-0.327956	0.841418	0.742945	0.999837	Not Sig	nonsignificant	.	.	bone morphogenetic protein 1 [Source:RGD Symbol;Acc:620739]
Stk24	chr15	86	68	98.5992	83.8643	14.735	1.1757	0.137654	0.795345	NotSig	0.237696	small	8.30845	8.78176	7.83515	0.527808	-0.46607	0.892207	0.641166	0.999837	Not Sig	nonsignificant	.	Y	serine/threonine kinase 24 [Source:RGD Symbol;Acc:1561742]
Zfp821	chr19	51	62	105.185	79.7174	25.4677	1.31948	0.139637	0.795345	NotSig	0.308088	small	12.8095	15.3814	10.2376	0.442136	-1.26968	0.665581	0.2042	0.999837	Not Sig	nonsignificant	.	.	zinc finger protein 821 [Source:RGD Symbol;Acc:1306674]
Cops7b	chr9	35	30	70.4044	102.065	-31.6609	0.689797	0.140485	0.795345	NotSig	-0.250094	small	6.6878	7.36135	6.01426	0.588095	-0.663243	0.817005	0.507175	0.999837	Not Sig	nonsignificant	.	Y	COP9 signalosome subunit 7B [Source:RGD Symbol;Acc:1306918]
Eif2ak1	chr12	68	53	65.6482	82.7187	-17.0705	0.793632	0.140673	0.795345	NotSig	-0.204501	small	15.76	16.9262	14.5939	0.401253	-0.51181	0.862203	0.608784	0.999837	Not Sig	nonsignificant	.	Y	eukaryotic translation initiation factor 2 alpha kinase 1 [Source:RGD Symbol;Acc:70883]
Gnpda2	chr14	24	26	65.879	98.1695	-32.2905	0.671074	0.13997	0.795345	NotSig	-0.397233	small	7.32448	9.66362	4.98534	0.56016	-1.53513	0.515888	0.124751	0.999837	Not Sig	nonsignificant	.	Y	glucosamine-6-phosphate deaminase 2 [Source:RGD Symbol;Acc:1305521]
Smpdl3a	chr20	42	25	86.4435	72.9973	13.4462	1.1842	0.13939	0.795345	NotSig	0.171961	negligible	8.54059	8.25791	8.82326	0.524915	0.125664	1.06846	0.899998	0.999837	Not Sig	nonsignificant	.	.	sphingomyelin phosphodiesterase, acid-like 3A [Source:RGD Symbol;Acc:1359277]
Hyal2	chr8	19	33	81.3774	91.4043	-10.0269	0.890302	0.140758	0.795345	NotSig	-0.388668	small	7.21404	9.99504	4.43303	0.589107	-1.88814	0.443523	0.0590074	0.999837	Not Sig	nonsignificant	.	Y	hyaluronidase 2 [Source:RGD Symbol;Acc:620321]
Prune1	chr2	45	34	103.771	92.2148	11.5564	1.12532	0.141433	0.795974	NotSig	0.217145	small	7.84216	7.73617	7.94816	0.531337	-0.157159	1.0274	0.875119	0.999837	Not Sig	nonsignificant	.	.	prune exopolyphosphatase 1 [Source:RGD Symbol;Acc:1359521]
Bhlhe41	chr4	122	59	84.2526	68.5398	15.7128	1.22925	0.141299	0.795974	NotSig	0.226913	small	8.14878	4.75359	11.544	0.568942	2.11656	2.42848	0.0342974	0.999837	Not Sig	nonsignificant	.	Y	basic helix-loop-helix family, member e41 [Source:RGD Symbol;Acc:70900]
Gtf3a	chr12	27	17	70.2159	97.7356	-27.5196	0.718428	0.141409	0.795974	NotSig	-0.474781	small	6.59011	5.92557	7.25464	0.60474	0.337811	1.22429	0.735505	0.999837	Not Sig	nonsignificant	.	.	general transcription factor III A [Source:RGD Symbol;Acc:619746]
Mmp24os	chr3	179	124	100.892	109.594	-8.70146	0.920603	0.141652	0.796751	NotSig	-0.0814311	negligible	35.6895	34.7248	36.6542	0.283181	0.483368	1.05556	0.628834	0.999837	Not Sig	nonsignificant	.	.
Borcs7	chr1	52	26	80.7931	67.575	13.2181	1.19561	0.142063	0.797314	NotSig	0.19555	negligible	6.11015	4.66346	7.55684	0.609632	1.1581	1.62044	0.246824	0.999837	Not Sig	nonsignificant	.	.	BLOC-1 related complex subunit 7 [Source:RGD Symbol;Acc:1311783]
Ube2z	chr10	127	96	94.2265	82.096	12.1306	1.14776	0.141985	0.797314	NotSig	0.204113	small	19.5667	21.9533	17.1802	0.342634	-1.02727	0.782579	0.304295	0.999837	Not Sig	nonsignificant	.	.	ubiquitin-conjugating enzyme E2Z [Source:RGD Symbol;Acc:1308347]
Clasp1	chr13	61	56	121.093	95.037	26.0555	1.27416	0.142157	0.797314	NotSig	0.199271	negligible	10.6637	12.2126	9.11483	0.462083	-0.915802	0.746346	0.359771	0.999837	Not Sig	nonsignificant	.	.	cytoplasmic linker associated protein 1 [Source:RGD Symbol;Acc:1310970]
Nfkbia	chr6	85	67	85.1354	59.0837	26.0517	1.44093	0.142156	0.797314	NotSig	0.203409	small	20.564	22.0883	19.0396	0.350613	-0.438918	0.861979	0.660721	0.999837	Not Sig	nonsignificant	.	.	NFKB inhibitor alpha [Source:RGD Symbol;Acc:3171]
Ift20	chr10	52	35	71.5282	95.3736	-23.8454	0.749979	0.142296	0.797638	NotSig	-0.219489	small	11.7782	10.525	13.0314	0.454572	0.825131	1.23814	0.409297	0.999837	Not Sig	nonsignificant	.	.	intraflagellar transport 20 [Source:RGD Symbol;Acc:1309400]
Taz	chrX	27	18	117.897	76.6472	41.2495	1.53817	0.14246	0.798103	NotSig	0.393017	small	6.21526	5.52124	6.90927	0.620628	0.500466	1.2514	0.616747	0.999837	Not Sig	nonsignificant	.	Y
Hnrnpl	chr1	481	364	92.8863	86.8446	6.04175	1.06957	0.142683	0.798428	NotSig	0.0871553	negligible	111.241	108.334	114.148	0.184507	0.280482	1.05367	0.779108	0.999837	Not Sig	nonsignificant	.	.	heterogeneous nuclear ribonucleoprotein L [Source:RGD Symbol;Acc:71059]
Miga2	chr3	104	78	99.7716	89.0709	10.7007	1.12014	0.142727	0.798428	NotSig	0.210583	small	15.9423	17.1252	14.7595	0.399158	-0.313845	0.86186	0.753639	0.999837	Not Sig	nonsignificant	.	.	mitoguardin 2 [Source:RGD Symbol;Acc:1310887]
Cpq	chr7	53	33	77.3831	86.5626	-9.17948	0.893956	0.142762	0.798428	NotSig	-0.328876	small	11.5981	10.8858	12.3105	0.435525	0.463188	1.13088	0.64323	0.999837	Not Sig	nonsignificant	.	.	carboxypeptidase Q [Source:RGD Symbol;Acc:628610]
Arl8a	chr13	336	308	91.5231	99.1445	-7.62144	0.923128	0.14334	0.799685	NotSig	-0.121636	negligible	78.0624	83.8335	72.2913	0.185559	-1.15034	0.862321	0.250004	0.999837	Not Sig	nonsignificant	.	.	ADP-ribosylation factor like GTPase 8A [Source:RGD Symbol;Acc:1565940]
Btg1	chr7	446	83	93.4627	81.3353	12.1274	1.1491	0.143283	0.799685	NotSig	0.160094	negligible	64.8374	23.0915	106.583	0.596738	3.66076	4.61569	0.000251467	0.0281259	FDR<0.05	upregulated	.	.	BTG anti-proliferation factor 1 [Source:RGD Symbol;Acc:2224]
Tmem184b	chr7	85	77	104.673	95.3817	9.29129	1.09741	0.143189	0.799685	NotSig	0.229117	small	13.3078	13.8224	12.7931	0.431016	-0.427547	0.925532	0.668981	0.999837	Not Sig	nonsignificant	.	Y	transmembrane protein 184B [Source:RGD Symbol;Acc:1306591]
Elovl5	chr8	124	74	106.625	92.9174	13.7074	1.14752	0.143946	0.800911	NotSig	0.200229	small	20.7895	17.8283	23.7506	0.339359	1.06179	1.33218	0.288333	0.999837	Not Sig	nonsignificant	.	Y	ELOVL fatty acid elongase 5 [Source:RGD Symbol;Acc:620583]
Nudt16	chr8	61	45	88.1878	106.953	-18.765	0.824548	0.144102	0.800911	NotSig	-0.277016	small	11.3802	11.7427	11.0176	0.493595	-0.145813	0.938249	0.884069	0.999837	Not Sig	nonsignificant	.	.	nudix hydrolase 16 [Source:RGD Symbol;Acc:1311387]
Ggct	chr4	31	23	93.7948	73.1226	20.6722	1.28271	0.144061	0.800911	NotSig	0.441156	small	7.56432	7.4913	7.63733	0.552765	-0.012918	1.01949	0.989693	0.999837	Not Sig	nonsignificant	Y	.	gamma-glutamyl cyclotransferase [Source:RGD Symbol;Acc:1304876]
Atp6v1b2	chr16	972	725	102.098	97.5256	4.57267	1.04689	0.144289	0.801249	NotSig	0.0743714	negligible	199.511	197.388	201.634	0.13632	0.245556	1.02151	0.806026	0.999837	Not Sig	nonsignificant	.	.	ATPase H+ transporting V1 subunit B2 [Source:RGD Symbol;Acc:620284]
Ivd	chr3	80	70	95.3109	111.972	-16.6612	0.851203	0.144326	0.801249	NotSig	-0.218782	small	17.1101	18.008	16.2123	0.405272	-0.0929701	0.900284	0.925927	0.999837	Not Sig	nonsignificant	.	.	isovaleryl-CoA dehydrogenase [Source:RGD Symbol;Acc:2936]
Nploc4	chr10	117	97	95.1151	80.5959	14.5192	1.18015	0.144493	0.801271	NotSig	0.181483	negligible	16.8497	16.31	17.3893	0.388484	0.217019	1.06617	0.828194	0.999837	Not Sig	nonsignificant	.	.	NPL4 homolog, ubiquitin recognition factor [Source:RGD Symbol;Acc:620794]
Cct7	chr4	372	302	87.6276	81.9852	5.64242	1.06882	0.144412	0.801271	NotSig	0.114672	negligible	89.1756	93.9389	84.4123	0.197717	-0.78565	0.898588	0.432072	0.999837	Not Sig	nonsignificant	.	.	chaperonin containing TCP1 subunit 7 [Source:RGD Symbol;Acc:1306422]
Syt17	chr1	81	92	73.0695	88.776	-15.7065	0.823077	0.145044	0.802064	NotSig	-0.18938	negligible	19.1233	21.274	16.9725	0.351715	-1.11315	0.797805	0.265644	0.999837	Not Sig	nonsignificant	.	.	synaptotagmin 17 [Source:RGD Symbol;Acc:708576]
Rbbp7	chrX	280	165	95.3664	90.1263	5.24009	1.05814	0.144841	0.802064	NotSig	0.148073	negligible	59.8754	51.1321	68.6187	0.227618	1.88688	1.34199	0.0591759	0.999837	Not Sig	nonsignificant	.	.	RB binding protein 7, chromatin remodeling factor [Source:RGD Symbol;Acc:620125]
Crtac1	chr1	143	108	103.818	90.1798	13.6377	1.15123	0.145713	0.804755	NotSig	0.196909	negligible	31.0817	30.0693	32.0941	0.283843	0.339403	1.06734	0.734306	0.999837	Not Sig	nonsignificant	.	Y	cartilage acidic protein 1 [Source:RGD Symbol;Acc:621085]
Tprkb	chr4	57	42	87.8737	111.918	-24.0445	0.78516	0.145664	0.804755	NotSig	-0.298794	small	9.4305	7.86773	10.9933	0.511317	0.899318	1.39726	0.368483	0.999837	Not Sig	nonsignificant	.	.	Tp53rk binding protein [Source:RGD Symbol;Acc:1309786]
Vwa5b2	chr11	37	19	186.006	137.876	48.1293	1.34908	0.146034	0.804826	NotSig	0.377171	small	6.49526	4.60125	8.38926	0.604211	1.39385	1.82326	0.163362	0.999837	Not Sig	nonsignificant	.	.	von Willebrand factor A domain containing 5B2 [Source:RGD Symbol;Acc:1564491]
Tmem50a	chr5	284	230	93.9853	101.275	-7.28996	0.928018	0.146011	0.804826	NotSig	-0.167741	negligible	68.9597	70.7217	67.1978	0.195228	-0.422471	0.950173	0.672682	0.999837	Not Sig	nonsignificant	.	Y	transmembrane protein 50A [Source:RGD Symbol;Acc:1305638]
Pdlim4	chr10	41	45	63.2189	82.6196	-19.4007	0.76518	0.146274	0.805694	NotSig	-0.327197	small	12.0978	13.5931	10.6026	0.441999	-0.783889	0.780003	0.433105	0.999837	Not Sig	nonsignificant	.	.	PDZ and LIM domain 4 [Source:RGD Symbol;Acc:3575]
Bcas1	chr3	177	117	74.2148	80.8013	-6.58647	0.918486	0.146879	0.808121	NotSig	-0.194051	negligible	36.7903	33.5195	40.0611	0.269126	1.151	1.19516	0.249731	0.999837	Not Sig	nonsignificant	.	.	brain enriched myelin associated protein 1 [Source:RGD Symbol;Acc:628644]
Pcsk1n	chrX	2380	1798	95.5569	98.1424	-2.58547	0.973656	0.146871	0.808121	NotSig	-0.0628258	negligible	547.503	541.684	553.322	0.153001	0.21951	1.02149	0.826253	0.999837	Not Sig	nonsignificant	.	.	proprotein convertase subtilisin/kexin type 1 inhibitor [Source:RGD Symbol;Acc:3617]
Ctsd	chr1	454	372	85.8948	92.5925	-6.69766	0.927665	0.147609	0.80859	NotSig	-0.0789773	negligible	99.2801	102.89	95.6704	0.208093	-0.590329	0.929834	0.55497	0.999837	Not Sig	nonsignificant	.	Y	cathepsin D [Source:RGD Symbol;Acc:621511]
Fis1	chr12	407	287	86.8982	81.568	5.33025	1.06535	0.147683	0.80859	NotSig	0.084745	negligible	91.2168	88.2252	94.2084	0.181589	0.563232	1.06782	0.573277	0.999837	Not Sig	nonsignificant	.	.	fission, mitochondrial 1 [Source:RGD Symbol;Acc:1306668]
Rab3gap1	chr13	124	91	88.6875	103.388	-14.7005	0.857812	0.147346	0.80859	NotSig	-0.213716	small	22.6363	19.7211	25.5514	0.324172	1.01906	1.29564	0.308175	0.999837	Not Sig	nonsignificant	.	.	RAB3 GTPase activating protein catalytic subunit 1 [Source:RGD Symbol;Acc:1306487]
Abt1	chr17	45	39	55.4679	80.3943	-24.9264	0.689948	0.147452	0.80859	NotSig	-0.279887	small	10.1624	10.2729	10.0519	0.513653	-0.0571864	0.978489	0.954397	0.999837	Not Sig	nonsignificant	.	.	activator of basal transcription 1 [Source:RGD Symbol;Acc:1310785]
Slc12a2	chr18	74	55	89.7454	75.2806	14.4648	1.19214	0.147663	0.80859	NotSig	0.191794	negligible	10.9882	12.0075	9.969	0.447416	-0.55925	0.830234	0.575991	0.999837	Not Sig	nonsignificant	Y	Y	solute carrier family 12 member 2 [Source:RGD Symbol;Acc:620809]
Fjx1	chr3	136	128	81.3035	88.4719	-7.16847	0.918975	0.147725	0.80859	NotSig	-0.180908	negligible	17.7411	20.0623	15.4198	0.364893	-1.07943	0.768596	0.280395	0.999837	Not Sig	nonsignificant	.	.	four-jointed box kinase 1 [Source:RGD Symbol;Acc:1306113]
LOC687780	chr6	343	195	51.0703	54.5204	-3.45003	0.93672	0.147786	0.80859	NotSig	-0.100914	negligible	168.76	150.549	186.971	0.160565	1.99654	1.24193	0.045875	0.999837	Not Sig	nonsignificant	.	.	similar to Finkel-Biskis-Reilly murine sarcoma virusubiquitously expressed [Source:RGD Symbol;Acc:1597505]
Wdr12	chr9	54	50	88.6934	70.7493	17.9441	1.25363	0.147694	0.80859	NotSig	0.385439	small	13.6211	14.2752	12.9669	0.422237	-0.379304	0.908351	0.704462	0.999837	Not Sig	nonsignificant	.	.	WD repeat domain 12 [Source:RGD Symbol;Acc:735072]
LOC120096281	chr13	21	24	82.7286	55.2248	27.5038	1.49803	0.148522	0.808842	NotSig	0.382791	small	6.04145	5.73339	6.3495	0.60529	0.184472	1.10746	0.853643	0.999837	Not Sig	nonsignificant	.	.	heterogeneous nuclear ribonucleoprotein A3-like [Source:RGD Symbol;Acc:41086608]
Limch1	chr14	82	73	84.2787	108.125	-23.8466	0.779454	0.148031	0.808842	NotSig	-0.148727	negligible	13.4308	17.2935	9.56807	0.448675	-2.02074	0.553275	0.0433062	0.999837	Not Sig	nonsignificant	.	Y	LIM and calponin homology domains 1 [Source:RGD Symbol;Acc:1305269]
Stim2	chr14	129	104	106.434	96.8776	9.55673	1.09865	0.14822	0.808842	NotSig	0.175253	negligible	26.7586	29.1473	24.3699	0.327711	-0.923039	0.836095	0.355987	0.999837	Not Sig	nonsignificant	.	.	stromal interaction molecule 2 [Source:RGD Symbol;Acc:1304641]
Gtf2e2	chr16	37	23	85.2464	112.725	-27.4783	0.756235	0.148573	0.808842	NotSig	-0.377327	small	7.29041	6.41608	8.16473	0.584923	0.86546	1.27254	0.386787	0.999837	Not Sig	nonsignificant	.	.	general transcription factor IIE subunit 2 [Source:RGD Symbol;Acc:1310134]
LOC681282	chr7	25	23	63.6301	95.2584	-31.6283	0.667974	0.148529	0.808842	NotSig	-0.282385	small	6.49219	7.82444	5.15993	0.61152	-0.917815	0.659463	0.358716	0.999837	Not Sig	nonsignificant	.	.
Slc16a1	chr2	66	31	81.4459	54.835	26.6109	1.48529	0.147964	0.808842	NotSig	0.274187	small	11.4876	8.88381	14.0914	0.477936	1.27509	1.58619	0.202277	0.999837	Not Sig	nonsignificant	.	Y	solute carrier family 16 member 1 [Source:RGD Symbol;Acc:3690]
Prpf40b	chr7	37	19	140.849	94.8294	46.0197	1.48529	0.148449	0.808842	NotSig	0.412366	small	6.79458	5.57049	8.01868	0.610762	0.760332	1.43949	0.447056	0.999837	Not Sig	nonsignificant	.	.	pre-mRNA processing factor 40 homolog B [Source:RGD Symbol;Acc:1565411]
Ppp1r11	chr20	215	155	91.6362	82.1174	9.51879	1.11592	0.149062	0.810162	NotSig	0.152313	negligible	41.9626	42.9966	40.9286	0.249799	-0.0803225	0.951902	0.935981	0.999837	Not Sig	nonsignificant	.	.	protein phosphatase 1, regulatory (inhibitor) subunit 11 [Source:RGD Symbol;Acc:1303163]
Parvb	chr7	77	52	91.6696	76.5083	15.1613	1.19817	0.149033	0.810162	NotSig	0.195323	negligible	9.73958	10.0393	9.4399	0.496992	-0.292046	0.9403	0.770252	0.999837	Not Sig	nonsignificant	.	.	parvin, beta [Source:RGD Symbol;Acc:1311485]
Ablim3	chr18	45	31	73.2912	92.8052	-19.5141	0.789731	0.149044	0.810162	NotSig	-0.344525	small	6.82433	6.70619	6.94247	0.562465	0.00433745	1.03523	0.996539	0.999837	Not Sig	nonsignificant	.	.	actin binding LIM protein family, member 3 [Source:RGD Symbol;Acc:1565118]
Lss	chr20	45	22	126.713	100.039	26.6743	1.26664	0.149291	0.810211	NotSig	0.382414	small	6.41152	6.49563	6.32742	0.619033	0.132303	0.974103	0.894745	0.999837	Not Sig	nonsignificant	.	.	lanosterol synthase [Source:RGD Symbol;Acc:620955]
Hnrnpm	chr7	99	78	112.493	94.1606	18.3324	1.19469	0.149319	0.810211	NotSig	0.226591	small	25.1617	27.9922	22.3311	0.332154	-0.742538	0.797761	0.457761	0.999837	Not Sig	nonsignificant	.	Y	heterogeneous nuclear ribonucleoprotein M [Source:RGD Symbol;Acc:620369]
Pdcd6	chr1	95	85	91.6539	101.48	-9.82578	0.903175	0.149487	0.81023	NotSig	-0.279591	small	21.2259	22.1983	20.2535	0.338385	-0.301418	0.91239	0.763096	0.999837	Not Sig	nonsignificant	.	.	programmed cell death 6 [Source:RGD Symbol;Acc:1311239]
Ahcyl1	chr2	328	254	107.636	99.6633	7.97226	1.07999	0.14945	0.81023	NotSig	0.0674849	negligible	50.0878	49.9856	50.1899	0.253586	-0.0885014	1.00409	0.929478	0.999837	Not Sig	nonsignificant	Y	Y	adenosylhomocysteinase-like 1 [Source:RGD Symbol;Acc:1309768]
Atp1b2	chr10	538	478	84.115	88.5045	-4.3895	0.950404	0.150138	0.811521	NotSig	-0.137084	negligible	99.255	108.895	89.6155	0.175567	-1.45511	0.822956	0.145638	0.999837	Not Sig	nonsignificant	Y	.	ATPase Na+/K+ transporting subunit beta 2 [Source:RGD Symbol;Acc:2171]
Arv1	chr19	38	30	89.7188	114.786	-25.0675	0.781616	0.150135	0.811521	NotSig	-0.348455	small	9.64868	9.09251	10.2049	0.489246	0.349371	1.12234	0.726811	0.999837	Not Sig	nonsignificant	.	.	ARV1 homolog, fatty acid homeostasis modulator [Source:RGD Symbol;Acc:1310264]
Snph	chr3	310	206	73.982	84.345	-10.3629	0.877136	0.150119	0.811521	NotSig	-0.137556	negligible	21.5029	17.4932	25.5126	0.416552	1.51835	1.45843	0.128926	0.999837	Not Sig	nonsignificant	.	.	syntaphilin [Source:RGD Symbol;Acc:1305867]
Rangap1	chr7	319	195	91.3441	82.6767	8.6674	1.10483	0.149909	0.811521	NotSig	0.129256	negligible	63.3099	59.9444	66.6753	0.25026	0.693622	1.11229	0.487919	0.999837	Not Sig	nonsignificant	.	.	RAN GTPase activating protein 1 [Source:RGD Symbol;Acc:1310380]
Gabra5	chr1	278	229	78.7205	86.8084	-8.08792	0.90683	0.150714	0.811731	NotSig	-0.143394	negligible	63.5611	67.3751	59.747	0.211609	-0.853349	0.886782	0.393466	0.999837	Not Sig	nonsignificant	.	Y	gamma-aminobutyric acid type A receptor subunit alpha 5 [Source:RGD Symbol;Acc:61859]
Tmco3	chr16	30	32	133.731	94.4494	39.2816	1.4159	0.150755	0.811731	NotSig	0.261897	small	9.53806	10.1907	8.88545	0.496646	-0.498185	0.871921	0.618354	0.999837	Not Sig	nonsignificant	.	.	transmembrane and coiled-coil domains 3 [Source:RGD Symbol;Acc:1306586]
Ak5	chr2	281	220	104.219	109.576	-5.35702	0.951111	0.150692	0.811731	NotSig	-0.139376	negligible	60.3955	60.1998	60.5912	0.209599	-0.0987944	1.0065	0.921302	0.999837	Not Sig	nonsignificant	.	.	adenylate kinase 5 [Source:RGD Symbol;Acc:1590818]
Ddn	chr7	1318	976	112.545	110.004	2.54172	1.02311	0.150616	0.811731	NotSig	0.0724453	negligible	76.5137	74.7792	78.2481	0.232073	0.131594	1.04639	0.895305	0.999837	Not Sig	nonsignificant	.	.	dendrin [Source:RGD Symbol;Acc:2497]
Gnai2	chr8	362	310	76.7831	81.7252	-4.94211	0.939528	0.150652	0.811731	NotSig	-0.0798326	negligible	91.4369	94.2933	88.5804	0.179331	-0.488241	0.939413	0.625379	0.999837	Not Sig	nonsignificant	.	.	G protein subunit alpha i2 [Source:RGD Symbol;Acc:620243]
Cggbp1	chr11	48	50	58.2321	74.2608	-16.0287	0.784157	0.151088	0.811786	NotSig	-0.339557	small	6.00414	7.41164	4.59665	0.611809	-1.26518	0.620194	0.205807	0.999837	Not Sig	nonsignificant	Y	Y	CGG triplet repeat binding protein 1 [Source:RGD Symbol;Acc:1308129]
Rab3a	chr16	1523	1214	92.1884	96.2731	-4.08473	0.957571	0.152169	0.811786	NotSig	-0.0651253	negligible	336.282	330.799	341.766	0.122747	0.32698	1.03315	0.743683	0.999837	Not Sig	nonsignificant	.	Y	RAB3A, member RAS oncogene family [Source:RGD Symbol;Acc:3528]
Ctnna1	chr18	66	53	94.101	83.9461	10.1549	1.12097	0.151089	0.811786	NotSig	0.360181	small	14.1462	15.0921	13.2004	0.40886	-0.448354	0.874653	0.653897	0.999837	Not Sig	nonsignificant	.	.	catenin alpha 1 [Source:RGD Symbol;Acc:1359485]
Txnip	chr2	91	55	70.0532	87.3046	-17.2514	0.8024	0.151637	0.811786	NotSig	-0.272919	small	14.8418	13.6674	16.0162	0.412647	0.761521	1.17185	0.446346	0.999837	Not Sig	nonsignificant	.	Y	thioredoxin interacting protein [Source:RGD Symbol;Acc:620886]
Vcam1	chr2	34	39	87.4115	79.1245	8.28701	1.10473	0.152071	0.811786	NotSig	0.237168	small	9.50698	10.589	8.42494	0.48375	-0.751802	0.795629	0.45217	0.999837	Not Sig	nonsignificant	.	Y	vascular cell adhesion molecule 1 [Source:RGD Symbol;Acc:3952]
Rps18	chr20	739	578	53.4189	50.489	2.92997	1.05803	0.151972	0.811786	NotSig	0.0415216	negligible	82.4883	87.7713	77.2053	0.20069	-1.06494	0.879618	0.286901	0.999837	Not Sig	nonsignificant	.	.
Ccdc12	chr8	40	31	69.7685	95.7246	-25.9561	0.728846	0.152151	0.811786	NotSig	-0.36114	small	11.1197	11.5471	10.6922	0.489184	-0.10975	0.925962	0.912608	0.999837	Not Sig	nonsignificant	.	.	coiled-coil domain containing 12 [Source:RGD Symbol;Acc:1306081]
Hdgfl2	chr9	104	64	66.9019	83.1523	-16.2504	0.80457	0.151128	0.811786	NotSig	-0.205282	small	23.1401	21.4036	24.8765	0.325285	0.720718	1.16226	0.471083	0.999837	Not Sig	nonsignificant	.	Y	HDGF like 2 [Source:RGD Symbol;Acc:621013]
Sh3kbp1	chrX	34	30	87.6902	116.763	-29.0733	0.751007	0.151889	0.811786	NotSig	-0.496449	small	6.98053	8.07287	5.88819	0.591574	-0.720585	0.72938	0.471165	0.999837	Not Sig	nonsignificant	.	Y	SH3 domain-containing kinase-binding protein 1 [Source:RGD Symbol;Acc:620904]
Eif1ax	chrX	114	116	69.4491	79.8469	-10.3978	0.869779	0.151844	0.811786	NotSig	-0.0721717	negligible	17.1338	20.6256	13.642	0.377512	-1.7811	0.661407	0.0748969	0.999837	Not Sig	nonsignificant	.	.	eukaryotic translation initiation factor 1A, X-linked [Source:RGD Symbol;Acc:1560198]
Exosc10	chr5	33	23	87.1005	120.967	-33.866	0.720038	0.152033	0.811786	NotSig	-0.370265	small	8.35801	8.10834	8.60768	0.531708	0.334461	1.06158	0.738032	0.999837	Not Sig	nonsignificant	.	Y	exosome component 10 [Source:RGD Symbol;Acc:1593248]
Eef1akmt1	chr15	38	29	81.1033	94.6652	-13.5619	0.856738	0.152651	0.812264	NotSig	-0.452796	small	8.613	7.98207	9.24392	0.565934	0.155566	1.15809	0.876375	0.999837	Not Sig	nonsignificant	.	.	EEF1A lysine methyltransferase 1 [Source:RGD Symbol;Acc:1306762]
Phyhip	chr15	881	663	102.513	108.001	-5.48863	0.94918	0.15241	0.812264	NotSig	-0.0594485	negligible	113.313	110.026	116.599	0.218955	0.465345	1.05974	0.641685	0.999837	Not Sig	nonsignificant	.	.	phytanoyl-CoA 2-hydroxylase interacting protein [Source:RGD Symbol;Acc:1305790]
Prkci	chr2	70	49	86.337	102.407	-16.0697	0.84308	0.152451	0.812264	NotSig	-0.207613	small	7.71208	6.534	8.89017	0.554099	0.822676	1.3606	0.410692	0.999837	Not Sig	nonsignificant	Y	.	protein kinase C, iota [Source:RGD Symbol;Acc:620961]
Pde1a	chr3	91	82	84.3823	98.7434	-14.3612	0.854561	0.15259	0.812264	NotSig	-0.195682	negligible	16.4018	18.7459	14.0577	0.397837	-1.16316	0.749907	0.244763	0.999837	Not Sig	nonsignificant	.	.	phosphodiesterase 1A [Source:RGD Symbol;Acc:68329]
Odc1	chr6	214	122	106.701	93.6508	13.0505	1.13935	0.152864	0.812427	NotSig	0.176094	negligible	43.0532	36.9217	49.1846	0.264895	1.48481	1.33213	0.137595	0.999837	Not Sig	nonsignificant	.	.	ornithine decarboxylase 1 [Source:RGD Symbol;Acc:3227]
Dguok	chr4	26	35	116.51	153.362	-36.8523	0.759704	0.152907	0.812427	NotSig	-0.355168	small	8.84115	10.976	6.70629	0.542046	-1.33658	0.610994	0.181361	0.999837	Not Sig	nonsignificant	.	Y	deoxyguanosine kinase [Source:RGD Symbol;Acc:1304799]
Clip3	chr1	427	389	91.4634	98.6344	-7.17106	0.927297	0.1542	0.813805	NotSig	-0.117603	negligible	74.4042	76.5959	72.2125	0.209578	-0.375216	0.942773	0.7075	0.999837	Not Sig	nonsignificant	.	.	CAP-GLY domain containing linker protein 3 [Source:RGD Symbol;Acc:1306245]
Luc7l	chr10	61	50	101.132	116.109	-14.977	0.871009	0.154865	0.813805	NotSig	-0.307889	small	6.54698	7.01087	6.0831	0.605939	-0.441079	0.867667	0.659156	0.999837	Not Sig	nonsignificant	.	Y	LUC7-like [Source:RGD Symbol;Acc:1307542]
Tmem132b	chr12	98	82	65.1882	78.932	-13.7438	0.825878	0.154649	0.813805	NotSig	-0.218914	small	7.2137	6.40588	8.02151	0.54875	0.388	1.25221	0.698016	0.999837	Not Sig	nonsignificant	.	Y	transmembrane protein 132B [Source:RGD Symbol;Acc:1566191]
Habp4	chr17	217	179	79.9593	86.5022	-6.54288	0.924362	0.154493	0.813805	NotSig	-0.196829	negligible	48.7304	47.6771	49.7837	0.237852	0.128127	1.04418	0.898048	0.999837	Not Sig	nonsignificant	.	Y	hyaluronan binding protein 4 [Source:RGD Symbol;Acc:1306486]
Glrb	chr2	170	151	93.9424	103.438	-9.49529	0.908203	0.154554	0.813805	NotSig	-0.163726	negligible	35.1065	40.3432	29.8698	0.277313	-1.56903	0.740392	0.116642	0.999837	Not Sig	nonsignificant	.	.	glycine receptor, beta [Source:RGD Symbol;Acc:2706]
Selenof	chr2	567	443	93.6047	98.8124	-5.20763	0.947298	0.154704	0.813805	NotSig	-0.0652771	negligible	134.205	139.818	128.592	0.163822	-0.584181	0.919706	0.559098	0.999837	Not Sig	nonsignificant	.	.	selenoprotein F [Source:RGD Symbol;Acc:621291]
Abhd16a	chr20	127	91	80.1704	97.3321	-17.1617	0.823679	0.15379	0.813805	NotSig	-0.204224	small	29.2967	31.0975	27.4958	0.304276	-0.496355	0.88418	0.619644	0.999837	Not Sig	nonsignificant	.	.	abhydrolase domain containing 16A, phospholipase [Source:RGD Symbol;Acc:1303164]
Ambra1	chr3	67	55	75.518	94.0779	-18.5599	0.802717	0.154795	0.813805	NotSig	-0.26445	small	10.9172	9.17723	12.6572	0.511253	0.636041	1.3792	0.52475	0.999837	Not Sig	nonsignificant	.	.	autophagy and beclin 1 regulator 1 [Source:RGD Symbol;Acc:621330]
Tmcc3	chr7	70	43	63.2851	78.3438	-15.0587	0.807787	0.15407	0.813805	NotSig	-0.296101	small	6.39251	7.33896	5.44606	0.612911	-0.70802	0.742074	0.478933	0.999837	Not Sig	nonsignificant	.	Y	transmembrane and coiled-coil domain family 3 [Source:RGD Symbol;Acc:1307241]
Rnf6	chr12	42	50	106.558	125.506	-18.9482	0.849025	0.154789	0.813805	NotSig	-0.295734	small	6.29649	7.41164	5.18134	0.602571	-0.893273	0.699082	0.371711	0.999837	Not Sig	nonsignificant	.	Y	ring finger protein 6 [Source:RGD Symbol;Acc:1306092]
Mtres1	chr20	34	30	79.8902	100.725	-20.8347	0.793152	0.153788	0.813805	NotSig	-0.333644	small	8.29676	9.67844	6.91508	0.545181	-0.98801	0.714483	0.323148	0.999837	Not Sig	nonsignificant	.	.	mitochondrial transcription rescue factor 1 [Source:RGD Symbol;Acc:1597785]
Otud6b	chr5	82	46	99.0358	121.051	-22.0156	0.81813	0.154784	0.813805	NotSig	-0.194048	negligible	12.1908	9.42405	14.9575	0.447493	1.42617	1.58717	0.153819	0.999837	Not Sig	nonsignificant	.	Y	OTU deubiquitinase 6B [Source:RGD Symbol;Acc:1310024]
Preb	chr6	63	36	96.4425	82.462	13.9804	1.16954	0.153931	0.813805	NotSig	0.346829	small	13.6133	12.364	14.8626	0.421487	0.785839	1.20209	0.431962	0.999837	Not Sig	nonsignificant	.	.	prolactin regulatory element binding [Source:RGD Symbol;Acc:61929]
Macrod1	chr1	42	49	104.964	95.8962	9.06735	1.09455	0.154105	0.813805	NotSig	0.222998	small	8.54484	10.4063	6.68341	0.516928	-1.29052	0.642249	0.196869	0.999837	Not Sig	nonsignificant	.	Y	mono-ADP ribosylhydrolase 1 [Source:RGD Symbol;Acc:628701]
Sash1	chr1	68	55	88.8534	75.6335	13.2199	1.17479	0.155072	0.813934	NotSig	0.261187	small	8.44933	7.11636	9.78231	0.515787	0.767034	1.37462	0.443061	0.999837	Not Sig	nonsignificant	Y	.	SAM and SH3 domain containing 1 [Source:RGD Symbol;Acc:1566017]
Aldh3a2	chr10	82	62	76.3105	94.3874	-18.0769	0.808482	0.155534	0.813934	NotSig	-0.243339	small	16.1484	16.8884	15.4084	0.388812	-0.490474	0.912367	0.623799	0.999837	Not Sig	nonsignificant	.	.	aldehyde dehydrogenase 3 family, member A2 [Source:RGD Symbol;Acc:61866]
Fmnl1	chr10	140	117	77.9527	67.582	10.3707	1.15345	0.155436	0.813934	NotSig	0.180046	negligible	36.797	40.6426	32.9513	0.274527	-1.07571	0.810759	0.282056	0.999837	Not Sig	nonsignificant	.	.	formin-like 1 [Source:RGD Symbol;Acc:1311042]
Zdhhc2	chr16	69	47	72.1695	85.391	-13.2215	0.845165	0.155551	0.813934	NotSig	-0.266233	small	13.7074	13.4383	13.9764	0.437183	0.143654	1.04004	0.885773	0.999837	Not Sig	nonsignificant	.	Y	zinc finger DHHC-type palmitoyltransferase 2 [Source:RGD Symbol;Acc:628681]
Htt	chr14	57	39	110.129	76.2279	33.9012	1.44474	0.15526	0.813934	NotSig	0.27636	small	7.48067	8.19292	6.76842	0.611004	-0.200999	0.82613	0.840699	0.999837	Not Sig	nonsignificant	.	.	huntingtin [Source:RGD Symbol;Acc:68337]
Rev3l	chr20	41	34	105.488	141.473	-35.9856	0.745637	0.155351	0.813934	NotSig	-0.360533	small	8.90236	10.5821	7.22259	0.52264	-1.00487	0.682526	0.31496	0.999837	Not Sig	nonsignificant	.	Y	REV3 like, DNA directed polymerase zeta catalytic subunit [Source:RGD Symbol;Acc:1307087]
Map1lc3a	chr3	577	442	93.4195	89.241	4.17853	1.04682	0.155908	0.814599	NotSig	0.0795406	negligible	131.376	125.926	136.827	0.169426	0.559278	1.08657	0.575972	0.999837	Not Sig	nonsignificant	.	.	microtubule-associated protein 1 light chain 3 alpha [Source:RGD Symbol;Acc:735183]
Gpr22	chr6	150	85	89.4266	77.0899	12.3366	1.16003	0.155924	0.814599	NotSig	0.200413	small	14.525	15.1467	13.9032	0.423298	-0.0625548	0.917898	0.950121	0.999837	Not Sig	nonsignificant	Y	Y	G protein-coupled receptor 22 [Source:RGD Symbol;Acc:1310848]
Tmem158	chr8	130	103	80.6366	91.7807	-11.1441	0.878579	0.155927	0.814599	NotSig	-0.19173	negligible	19.8646	18.2757	21.4535	0.349981	0.471914	1.17388	0.636988	0.999837	Not Sig	nonsignificant	.	.	transmembrane protein 158 [Source:RGD Symbol;Acc:708473]
Trpc4ap	chr3	137	115	74.923	87.3363	-12.4133	0.857868	0.1563	0.814779	NotSig	-0.192091	negligible	38.6441	39.2762	38.012	0.255703	-0.29939	0.967813	0.764642	0.999837	Not Sig	nonsignificant	.	.	transient receptor potential cation channel, subfamily C, member 4 associated protein [Source:RGD Symbol;Acc:1309914]
Sh2d3c	chr3	30	28	79.6209	55.0574	24.5636	1.44615	0.156753	0.814783	NotSig	0.211585	small	7.45116	7.92398	6.97835	0.551514	-0.361951	0.880663	0.717388	0.999837	Not Sig	nonsignificant	.	.	SH2 domain containing 3C [Source:RGD Symbol;Acc:1307287]
Mtdh	chr7	99	56	96.9597	80.1335	16.8262	1.20998	0.157463	0.815869	NotSig	0.168424	negligible	11.3429	9.10536	13.5804	0.448369	1.20708	1.49147	0.227401	0.999837	Not Sig	nonsignificant	.	.	metadherin [Source:RGD Symbol;Acc:620992]
Hsdl1	chr19	72	55	79.656	98.9175	-19.2614	0.805278	0.157498	0.815869	NotSig	-0.241575	small	10.4464	10.5544	10.3384	0.494815	0.10284	0.979543	0.91809	0.999837	Not Sig	nonsignificant	.	.	hydroxysteroid dehydrogenase like 1 [Source:RGD Symbol;Acc:1308433]
Hspa12a	chr1	174	130	92.6783	103.786	-11.1073	0.892978	0.157603	0.815983	NotSig	-0.189021	negligible	17.5873	18.7923	16.3824	0.422051	-0.223849	0.871761	0.822875	0.999837	Not Sig	nonsignificant	.	.	heat shock protein family A (Hsp70) member 12A [Source:RGD Symbol;Acc:1305531]
Pgap4	chr5	96	89	73.1821	85.6221	-12.44	0.85471	0.157799	0.816566	NotSig	-0.158242	negligible	17.2477	19.3475	15.1479	0.390451	-0.958195	0.782936	0.337964	0.999837	Not Sig	nonsignificant	.	.	post-GPI attachment to proteins GalNAc transferase 4 [Source:RGD Symbol;Acc:1307218]
Slc6a17	chr2	343	259	111.194	107.449	3.74573	1.03486	0.157918	0.816752	NotSig	0.105402	negligible	7.00264	7.63122	6.37406	0.611889	-0.296531	0.83526	0.766825	0.999837	Not Sig	nonsignificant	.	Y	solute carrier family 6 member 17 [Source:RGD Symbol;Acc:1587185]
Rnf111	chr8	68	32	100.915	82.6777	18.2376	1.22059	0.158125	0.8168	NotSig	0.332986	small	8.98145	8.17836	9.78453	0.515729	0.548064	1.19639	0.583648	0.999837	Not Sig	nonsignificant	.	.	ring finger protein 111 [Source:RGD Symbol;Acc:1310097]
Dipk2a	chr8	73	37	104.97	65.4444	39.5255	1.60396	0.158259	0.8168	NotSig	0.305682	small	9.02548	5.85622	12.1947	0.591036	1.58665	2.08235	0.112592	0.999837	Not Sig	nonsignificant	Y	Y	divergent protein kinase domain 2A [Source:RGD Symbol;Acc:1309079]
Pias3	chr2	28	26	84.1894	115.432	-31.2423	0.729344	0.15823	0.8168	NotSig	-0.313685	small	8.10469	9.75878	6.4506	0.547137	-0.80543	0.661004	0.420571	0.999837	Not Sig	nonsignificant	.	Y	protein inhibitor of activated STAT, 3 [Source:RGD Symbol;Acc:708413]
Atg9a	chr9	153	120	98.4252	110.126	-11.7009	0.89375	0.158497	0.817171	NotSig	-0.168366	negligible	29.6353	27.7874	31.4832	0.310293	0.344498	1.133	0.730472	0.999837	Not Sig	nonsignificant	.	.	autophagy related 9A [Source:RGD Symbol;Acc:1310450]
Timm8a1	chrX	69	63	83.25	94.2386	-10.9885	0.883397	0.158489	0.817171	NotSig	-0.203983	small	11.6329	12.443	10.8227	0.440764	-0.547473	0.869782	0.584054	0.999837	Not Sig	nonsignificant	.	Y	translocase of inner mitochondrial membrane 8A1 [Source:RGD Symbol;Acc:621801]
Cnot3	chr1	45	24	110.454	72.7888	37.6656	1.51746	0.160064	0.817975	NotSig	0.358423	small	8.3745	7.31647	9.43252	0.543924	0.47892	1.28922	0.631995	0.999837	Not Sig	nonsignificant	.	.	CCR4-NOT transcription complex, subunit 3 [Source:RGD Symbol;Acc:1304771]
Rpl27a	chr1	1241	950	57.7607	55.5883	2.17245	1.03908	0.161832	0.817975	NotSig	0.0578255	negligible	225.246	225.663	224.829	0.142266	-0.138788	0.996304	0.889618	0.999837	Not Sig	nonsignificant	.	.
Xpo6	chr1	99	68	89.2887	72.8436	16.4451	1.22576	0.159835	0.817975	NotSig	0.198066	negligible	21.8809	21.0619	22.6999	0.32363	0.221171	1.07777	0.82496	0.999837	Not Sig	nonsignificant	.	.	exportin 6 [Source:RGD Symbol;Acc:1311491]
Paox	chr1	33	38	60.941	77.4041	-16.4632	0.787309	0.162979	0.817975	NotSig	-0.39422	small	9.75209	12.0318	7.47236	0.472335	-1.47634	0.621051	0.139854	0.999837	Not Sig	nonsignificant	.	.	polyamine oxidase [Source:RGD Symbol;Acc:1561125]
Gatd1	chr1	45	55	80.5009	102.383	-21.8825	0.786269	0.161618	0.817975	NotSig	-0.317029	small	8.12666	9.12018	7.13315	0.520482	-0.912805	0.782127	0.361345	0.999837	Not Sig	nonsignificant	.	.	glutamine amidotransferase class 1 domain containing 1 [Source:RGD Symbol;Acc:1304836]
B4gat1	chr1	176	145	90.8834	98.2194	-7.336	0.92531	0.16278	0.817975	NotSig	-0.162603	negligible	37.7844	40.8271	34.7417	0.284123	-0.720715	0.850948	0.471085	0.999837	Not Sig	nonsignificant	.	.	beta-1,4-glucuronyltransferase 1 [Source:RGD Symbol;Acc:1309541]
Sfxn3	chr1	77	64	93.5931	118.717	-25.1239	0.788372	0.161591	0.817975	NotSig	-0.200748	small	11.2956	11.3947	11.1965	0.466207	0.0754141	0.982606	0.939885	0.999837	Not Sig	nonsignificant	.	.	sideroflexin 3 [Source:RGD Symbol;Acc:620716]
Vdac1	chr10	673	523	103.607	108.221	-4.61351	0.957369	0.15987	0.817975	NotSig	-0.0741078	negligible	138.735	135.566	141.904	0.21121	0.137648	1.04675	0.890519	0.999837	Not Sig	nonsignificant	.	.	voltage-dependent anion channel 1 [Source:RGD Symbol;Acc:621575]
Pet100	chr12	148	93	78.0119	90.4379	-12.426	0.862601	0.161257	0.817975	NotSig	-0.189675	negligible	10.1402	9.40408	10.8764	0.484835	0.26569	1.15656	0.790478	0.999837	Not Sig	nonsignificant	.	.	PET100 cytochrome c oxidase chaperone [Source:RGD Symbol;Acc:1585222]
Clu	chr15	1600	1277	94.9577	96.4603	-1.50257	0.984423	0.16099	0.817975	NotSig	-0.033374	negligible	396.092	397.78	394.403	0.133506	-0.140649	0.991511	0.888147	0.999837	Not Sig	nonsignificant	.	.	clusterin [Source:RGD Symbol;Acc:3907]
Faf2	chr17	54	50	95.1691	71.501	23.6681	1.33102	0.160882	0.817975	NotSig	0.292058	small	8.08041	8.54274	7.61808	0.53241	-0.326345	0.891761	0.744163	0.999837	Not Sig	nonsignificant	.	Y	Fas associated factor family member 2 [Source:RGD Symbol;Acc:1306577]
Ttr	chr18	389	15	118.628	131.691	-13.0626	0.900808	0.162689	0.817975	NotSig	-0.364407	small	61.6589	4.77412	118.544	1.29202	3.64291	24.8305	0.000269573	0.0291625	FDR<0.05	upregulated	.	.	transthyretin [Source:RGD Symbol;Acc:3916]
Mt1	chr19	1235	200	136.476	128.74	7.73682	1.0601	0.161004	0.817975	NotSig	0.119532	negligible	97.8787	35.5078	160.249	0.540628	4.00882	4.51307	6.1022e-05	0.00838925	FDR<0.05	upregulated	.	.	metallothionein 1 [Source:RGD Symbol;Acc:3117]
Aars1	chr19	198	166	89.3204	80.5713	8.74903	1.10859	0.160994	0.817975	NotSig	0.153099	negligible	50.4478	53.052	47.8435	0.249548	-0.399993	0.901823	0.689161	0.999837	Not Sig	nonsignificant	.	.	alanyl-tRNA synthetase 1 [Source:RGD Symbol;Acc:1304832]
Plpp1	chr2	74	67	88.2059	108.705	-20.4987	0.811428	0.161014	0.817975	NotSig	-0.221288	small	17.0414	18.1624	15.9204	0.370951	-0.558579	0.876557	0.576449	0.999837	Not Sig	nonsignificant	.	.	phospholipid phosphatase 1 [Source:RGD Symbol;Acc:621832]
Car2	chr2	244	173	94.7625	84.7478	10.0147	1.11817	0.159812	0.817975	NotSig	0.126232	negligible	49.4969	46.5578	52.4359	0.252989	0.572153	1.12625	0.567219	0.999837	Not Sig	nonsignificant	.	.	carbonic anhydrase 2 [Source:RGD Symbol;Acc:2240]
Rpl22l1	chr2	504	309	73.8531	69.2404	4.61269	1.06662	0.160799	0.817975	NotSig	0.0777644	negligible	107.615	99.3245	115.906	0.184738	1.34859	1.16694	0.177467	0.999837	Not Sig	nonsignificant	.	.	ribosomal protein L22 like 1 [Source:RGD Symbol;Acc:1309517]
Pfn2	chr2	743	566	83.7302	88.9921	-5.26185	0.940873	0.161743	0.817975	NotSig	-0.0635132	negligible	157.966	157.893	158.039	0.152662	-0.107893	1.00092	0.91408	0.999837	Not Sig	nonsignificant	Y	Y	profilin 2 [Source:RGD Symbol;Acc:621826]
Ampd2	chr2	119	67	66.4966	82.2922	-15.7956	0.808055	0.161478	0.817975	NotSig	-0.240131	small	23.2265	22.3202	24.1329	0.317327	0.470475	1.08122	0.638016	0.999837	Not Sig	nonsignificant	.	.	adenosine monophosphate deaminase 2 [Source:RGD Symbol;Acc:2110]
Ndufv3	chr20	266	173	85.5654	92.6007	-7.03526	0.924026	0.160824	0.817975	NotSig	-0.159109	negligible	37.3012	34.7468	39.8555	0.266379	0.489902	1.14703	0.624203	0.999837	Not Sig	nonsignificant	.	.	NADH:ubiquinone oxidoreductase subunit V3 [Source:RGD Symbol;Acc:621020]
Psmd5	chr3	52	36	122.659	96.3101	26.3489	1.27358	0.162666	0.817975	NotSig	0.257065	small	10.1325	9.72769	10.5374	0.465726	0.203042	1.08324	0.839102	0.999837	Not Sig	nonsignificant	.	.	proteasome 26S subunit, non-ATPase 5 [Source:RGD Symbol;Acc:1308434]
Dync1i2	chr3	121	84	112.829	91.2445	21.5848	1.23656	0.160283	0.817975	NotSig	0.227154	small	29.4418	28.2648	30.6188	0.293915	0.412535	1.08328	0.679948	0.999837	Not Sig	nonsignificant	.	.	dynein cytoplasmic 1 intermediate chain 2 [Source:RGD Symbol;Acc:620174]
Slc24a3	chr3	217	177	88.3513	93.0533	-4.70204	0.949469	0.161814	0.817975	NotSig	-0.123197	negligible	41.8043	44.6438	38.9649	0.287757	-0.546688	0.872797	0.584593	0.999837	Not Sig	nonsignificant	.	.	solute carrier family 24 member 3 [Source:RGD Symbol;Acc:69256]
Dnajc5	chr3	399	274	94.1547	103.592	-9.43688	0.908903	0.159424	0.817975	NotSig	-0.100928	negligible	46.3475	45.069	47.626	0.245577	0.574299	1.05674	0.565766	0.999837	Not Sig	nonsignificant	.	.	DnaJ heat shock protein family (Hsp40) member C5 [Source:RGD Symbol;Acc:620516]
Nxph1	chr4	45	33	97.733	120.352	-22.619	0.81206	0.159739	0.817975	NotSig	-0.315269	small	10.1004	9.77176	10.429	0.551903	0.423301	1.06726	0.672076	0.999837	Not Sig	nonsignificant	.	.	neurexophilin 1 [Source:RGD Symbol;Acc:3218]
Map4k5	chr6	46	46	125.641	93.4661	32.1751	1.34424	0.162153	0.817975	NotSig	0.256696	small	9.95493	10.825	9.08482	0.488422	-0.428222	0.839241	0.668489	0.999837	Not Sig	nonsignificant	.	Y	mitogen-activated protein kinase kinase kinase kinase 5 [Source:RGD Symbol;Acc:1562028]
Txnrd1	chr7	61	67	104.768	85.7737	18.9938	1.22144	0.159294	0.817975	NotSig	0.24749	small	13.6954	16.8995	10.4913	0.413086	-1.53915	0.620806	0.123768	0.999837	Not Sig	nonsignificant	.	.	thioredoxin reductase 1 [Source:RGD Symbol;Acc:61959]
Cand1	chr7	114	71	77.667	94.3425	-16.6756	0.823245	0.159289	0.817975	NotSig	-0.198848	negligible	20.7343	18.8782	22.5904	0.360671	0.586614	1.19664	0.557463	0.999837	Not Sig	nonsignificant	.	Y	cullin-associated and neddylation-dissociated 1 [Source:RGD Symbol;Acc:620479]
L3mbtl2	chr7	30	27	106.018	147.605	-41.5876	0.718252	0.159564	0.817975	NotSig	-0.279607	small	6.36844	7.05667	5.68021	0.589273	-0.479547	0.804941	0.631549	0.999837	Not Sig	nonsignificant	.	Y	L3MBTL histone methyl-lysine binding protein 2 [Source:RGD Symbol;Acc:1308569]
Tafa5	chr7	249	223	75.8928	86.1496	-10.2568	0.880942	0.162962	0.817975	NotSig	-0.129929	negligible	44.3646	45.4203	43.3089	0.242163	-0.337771	0.953515	0.735536	0.999837	Not Sig	nonsignificant	.	.	TAFA chemokine like family member 5 [Source:RGD Symbol;Acc:1562115]
Nrp2	chr9	101	75	66.9944	87.0185	-20.0241	0.769887	0.161909	0.817975	NotSig	-0.144567	negligible	8.06989	7.44366	8.69613	0.561036	0.446083	1.16826	0.655537	0.999837	Not Sig	nonsignificant	.	Y	neuropilin 2 [Source:RGD Symbol;Acc:621442]
Psmd1	chr9	189	144	70.663	78.7247	-8.06161	0.897597	0.160293	0.817975	NotSig	-0.18447	negligible	45.7633	46.2047	45.3219	0.251727	-0.108743	0.980893	0.913406	0.999837	Not Sig	nonsignificant	.	.	proteasome 26S subunit, non-ATPase 1 [Source:RGD Symbol;Acc:621669]
Cnksr2	chrX	141	113	100.098	87.5663	12.5315	1.14311	0.159515	0.817975	NotSig	0.137563	negligible	25.2936	27.3439	23.2433	0.309224	-0.774704	0.850036	0.438515	0.999837	Not Sig	nonsignificant	Y	.	connector enhancer of kinase suppressor of Ras 2 [Source:RGD Symbol;Acc:708454]
Pgk1	chrX	938	724	112.36	106.803	5.55653	1.05203	0.159056	0.817975	NotSig	0.0564372	negligible	215.798	210.679	220.917	0.145036	0.358597	1.04859	0.719897	0.999837	Not Sig	nonsignificant	.	.	phosphoglycerate kinase 1 [Source:RGD Symbol;Acc:619878]
Aifm1	chrX	39	25	105.68	79.0628	26.6173	1.33666	0.162495	0.817975	NotSig	0.326094	small	7.66404	6.75292	8.57517	0.54182	0.524456	1.26985	0.599962	0.999837	Not Sig	nonsignificant	.	.	apoptosis inducing factor, mitochondria associated 1 [Source:RGD Symbol;Acc:620817]
LOC103692785	chr14	115	108	75.9102	84.938	-9.02775	0.893714	0.163117	0.818246	NotSig	-0.273908	small	30.6095	30.1402	31.0788	0.292691	0.0686414	1.03114	0.945275	0.999837	Not Sig	nonsignificant	.	.
Cyb5a	chr18	132	113	82.3757	92.3333	-9.95757	0.892156	0.163215	0.818322	NotSig	-0.245816	small	33.8887	36.1054	31.672	0.276893	-0.419667	0.877209	0.674728	0.999837	Not Sig	nonsignificant	.	.	cytochrome b5 type A [Source:RGD Symbol;Acc:620558]
Rnf146	chr1	104	84	73.4915	83.1628	-9.67128	0.883707	0.164592	0.818611	NotSig	-0.20683	small	17.6823	17.5574	17.8072	0.359772	-0.103815	1.01423	0.917316	0.999837	Not Sig	nonsignificant	Y	.	ring finger protein 146 [Source:RGD Symbol;Acc:1306482]
Pnpo	chr10	105	77	115.919	102.001	13.9182	1.13645	0.164142	0.818611	NotSig	0.164987	negligible	20.7165	21.57	19.863	0.352699	-0.397375	0.920863	0.691091	0.999837	Not Sig	nonsignificant	Y	.	pyridoxamine 5'-phosphate oxidase [Source:RGD Symbol;Acc:621456]
Sidt1	chr11	62	26	111.343	85.6616	25.6811	1.2998	0.164457	0.818611	NotSig	0.240716	small	7.73532	5.37935	10.0913	0.553317	1.49865	1.87593	0.133966	0.999837	Not Sig	nonsignificant	.	.	SID1 transmembrane family, member 1 [Source:RGD Symbol;Acc:1559616]
Parl	chr11	69	47	63.5018	78.9993	-15.4975	0.803827	0.164771	0.818611	NotSig	-0.285916	small	15.418	14.6969	16.1391	0.383685	0.280769	1.09814	0.778887	0.999837	Not Sig	nonsignificant	.	.	presenilin associated, rhomboid-like [Source:RGD Symbol;Acc:1306191]
Psmg3	chr12	37	40	97.3811	79.3727	18.0085	1.22688	0.164	0.818611	NotSig	0.344327	small	10.8493	12.9846	8.7139	0.480961	-1.2138	0.671093	0.224823	0.999837	Not Sig	nonsignificant	.	.	proteasome assembly chaperone 3 [Source:RGD Symbol;Acc:2319950]
G3bp2	chr14	305	221	94.9855	88.4141	6.57141	1.07433	0.163468	0.818611	NotSig	0.161867	negligible	45.7578	45.4246	46.091	0.245947	0.172	1.01467	0.863438	0.999837	Not Sig	nonsignificant	.	Y	G3BP stress granule assembly factor 2 [Source:RGD Symbol;Acc:1309571]
Impact	chr18	307	205	106.341	119.398	-13.057	0.890643	0.163868	0.818611	NotSig	-0.0865677	negligible	56.5455	55.6433	57.4477	0.232316	0.229699	1.03243	0.818326	0.999837	Not Sig	nonsignificant	.	Y	impact RWD domain protein [Source:RGD Symbol;Acc:1591977]
Tatdn2	chr4	43	29	67.6152	85.8345	-18.2194	0.787738	0.164725	0.818611	NotSig	-0.326236	small	7.72085	6.41529	9.0264	0.554433	0.661616	1.40701	0.508218	0.999837	Not Sig	nonsignificant	.	.	TatD DNase domain containing 2 [Source:RGD Symbol;Acc:1586017]
Laptm4a	chr6	681	528	90.1424	86.3662	3.77622	1.04372	0.164679	0.818611	NotSig	0.0687674	negligible	161.938	157.313	166.563	0.142212	0.594823	1.0588	0.551962	0.999837	Not Sig	nonsignificant	.	.	lysosomal protein transmembrane 4 alpha [Source:RGD Symbol;Acc:735179]
Shd	chr9	55	50	98.1543	84.7268	13.4275	1.15848	0.163802	0.818611	NotSig	0.202169	small	12.6689	13.2004	12.1374	0.419431	-0.3283	0.919476	0.742685	0.999837	Not Sig	nonsignificant	.	.	src homology 2 domain-containing transforming protein D [Source:RGD Symbol;Acc:1590885]
Ncor1	chr10	87	81	97.7345	79.9346	17.7999	1.22268	0.165378	0.820543	NotSig	0.158506	negligible	17.8897	18.1848	17.5947	0.365978	-0.169486	0.96755	0.865414	0.999837	Not Sig	nonsignificant	.	.	nuclear receptor co-repressor 1 [Source:RGD Symbol;Acc:3612]
Rala	chr17	96	95	71.5307	83.661	-12.1303	0.855006	0.165283	0.820543	NotSig	-0.268765	small	20.3676	21.6645	19.0707	0.359713	-0.566561	0.880277	0.571013	0.999837	Not Sig	nonsignificant	.	.	RAS like proto-oncogene A [Source:RGD Symbol;Acc:619851]
Dlgap3	chr5	296	210	70.8219	62.7975	8.02432	1.12778	0.165656	0.820933	NotSig	0.189445	negligible	59.3958	56.036	62.7556	0.23056	0.713176	1.11991	0.475737	0.999837	Not Sig	nonsignificant	.	.	DLG associated protein 3 [Source:RGD Symbol;Acc:708349]
Aip	chr1	107	77	80.4667	94.4863	-14.0197	0.851622	0.167417	0.820975	NotSig	-0.263603	small	25.365	25.888	24.8421	0.304345	-0.0693655	0.959598	0.944699	0.999837	Not Sig	nonsignificant	.	.	aryl-hydrocarbon receptor-interacting protein [Source:RGD Symbol;Acc:628619]
Rpp30	chr1	41	27	91.6338	117.57	-25.9359	0.7794	0.166024	0.820975	NotSig	-0.322416	small	8.48768	7.23335	9.742	0.532879	0.582353	1.34682	0.560329	0.999837	Not Sig	nonsignificant	.	.	ribonuclease P/MRP subunit p30 [Source:RGD Symbol;Acc:1595116]
Rab28	chr14	118	100	89.8424	77.6872	12.1552	1.15646	0.167508	0.820975	NotSig	0.143628	negligible	29.2776	28.946	29.6091	0.287607	-0.054568	1.02291	0.956483	0.999837	Not Sig	nonsignificant	.	.	RAB28, member RAS oncogene family [Source:RGD Symbol;Acc:620891]
Klhl26	chr16	110	97	95.512	106.159	-10.6475	0.899703	0.166839	0.820975	NotSig	-0.211511	small	6.14075	6.41196	5.86953	0.630977	-0.229667	0.915403	0.81835	0.999837	Not Sig	nonsignificant	.	.	kelch-like family member 26 [Source:RGD Symbol;Acc:1312034]
Atp11b	chr2	40	24	94.6995	126.183	-31.4831	0.750496	0.167628	0.820975	NotSig	-0.383456	small	7.68923	6.80665	8.5718	0.550391	0.347878	1.25933	0.727932	0.999837	Not Sig	nonsignificant	.	.	ATPase phospholipid transporting 11B (putative) [Source:RGD Symbol;Acc:1561719]
Lamtor2	chr2	253	213	60.7154	67.6029	-6.88751	0.898118	0.165765	0.820975	NotSig	-0.145383	negligible	57.9303	59.6887	56.1719	0.216477	-0.384127	0.941081	0.700884	0.999837	Not Sig	nonsignificant	.	.	late endosomal/lysosomal adaptor, MAPK and MTOR activator 2 [Source:RGD Symbol;Acc:1562501]
RT1-M6-2	chr20	43	31	87.3088	67.1986	20.1103	1.29927	0.167425	0.820975	NotSig	0.310316	small	7.69596	7.21245	8.17947	0.546281	0.199215	1.13408	0.842094	0.999837	Not Sig	nonsignificant	.	.	RT1 class I, locus M6, gene 2 [Source:RGD Symbol;Acc:1595815]
Phf20	chr3	74	49	78.6885	96.1114	-17.4229	0.818722	0.167752	0.820975	NotSig	-0.218955	small	11.0237	12.0051	10.0424	0.474471	-0.444083	0.83651	0.656983	0.999837	Not Sig	nonsignificant	.	.	PHD finger protein 20 [Source:RGD Symbol;Acc:1305020]
Spsb1	chr5	57	25	95.1303	73.7647	21.3657	1.28965	0.166021	0.820975	NotSig	0.364283	small	6.58867	5.97641	7.20094	0.64042	0.594062	1.20489	0.55247	0.999837	Not Sig	nonsignificant	.	.	splA/ryanodine receptor domain and SOCS box containing 1 [Source:RGD Symbol;Acc:1309319]
Sdf4	chr5	107	118	93.4952	83.625	9.87015	1.11803	0.166896	0.820975	NotSig	0.13625	negligible	26.37	30.8978	21.8422	0.305976	-1.58489	0.706918	0.112991	0.999837	Not Sig	nonsignificant	Y	.	stromal cell derived factor 4 [Source:RGD Symbol;Acc:621521]
Mettl7a	chr7	56	45	60.3729	78.5477	-18.1748	0.768614	0.167482	0.820975	NotSig	-0.259824	small	10.5439	9.95798	11.1298	0.502647	0.130814	1.11767	0.895922	0.999837	Not Sig	nonsignificant	.	Y	methyltransferase like 7A [Source:RGD Symbol;Acc:1308407]
Stt3b	chr8	65	39	87.4925	100.532	-13.0395	0.870295	0.166581	0.820975	NotSig	-0.285313	small	7.44662	5.11544	9.77779	0.599489	1.22065	1.91143	0.222218	0.999837	Not Sig	nonsignificant	.	Y	STT3 oligosaccharyltransferase complex catalytic subunit B [Source:RGD Symbol;Acc:1311563]
Rnf128	chrX	76	35	104.296	92.9069	11.3893	1.12259	0.166463	0.820975	NotSig	0.293436	small	15.4047	13.1128	17.6966	0.422363	1.07203	1.34957	0.283704	0.999837	Not Sig	nonsignificant	.	Y	ring finger protein 128 [Source:RGD Symbol;Acc:1566282]
Wdr33	chr18	42	35	87.6021	67.9024	19.6996	1.29012	0.167221	0.820975	NotSig	0.29994	small	8.64473	9.04819	8.24127	0.509318	-0.123066	0.91082	0.902055	0.999837	Not Sig	nonsignificant	.	Y	WD repeat domain 33 [Source:RGD Symbol;Acc:1309230]
Ndufc2	chr1	353	246	88.4301	95.0933	-6.66319	0.92993	0.168322	0.822537	NotSig	-0.120981	negligible	82.351	81.4384	83.2636	0.188409	0.415866	1.02241	0.677508	0.999837	Not Sig	nonsignificant	.	.	NADH:ubiquinone oxidoreductase subunit C2 [Source:RGD Symbol;Acc:1307511]
mrpl9	chr2	68	71	76.1463	94.717	-18.5706	0.803936	0.168239	0.822537	NotSig	-0.180631	negligible	17.3975	20.7285	14.0665	0.36869	-1.46723	0.678609	0.142314	0.999837	Not Sig	nonsignificant	.	.	mitochondrial ribosomal protein L9 [Source:RGD Symbol;Acc:1359171]
Acsl3	chr9	313	242	112.902	102.894	10.0085	1.09727	0.168282	0.822537	NotSig	0.125851	negligible	69.3574	70.0482	68.6666	0.211899	-0.215748	0.980275	0.829184	0.999837	Not Sig	nonsignificant	.	.	acyl-CoA synthetase long-chain family member 3 [Source:RGD Symbol;Acc:70552]
Myo5a	chr8	228	181	118.369	105.123	13.2466	1.12601	0.168788	0.82361	NotSig	0.087993	negligible	18.3377	20.2386	16.4368	0.412601	-0.425904	0.812151	0.670178	0.999837	Not Sig	nonsignificant	Y	Y	myosin VA [Source:RGD Symbol;Acc:3143]
Slc30a5	chr2	47	41	103.254	78.6729	24.5812	1.31245	0.168793	0.82361	NotSig	0.297595	small	11.4118	12.7857	10.0379	0.458644	-0.679027	0.785092	0.497121	0.999837	Not Sig	nonsignificant	.	.	solute carrier family 30 member 5 [Source:RGD Symbol;Acc:1306931]
Snf8	chr10	212	155	54.943	60.9487	-6.00569	0.901463	0.169029	0.823664	NotSig	-0.145184	negligible	49.043	46.3915	51.6945	0.234993	0.716275	1.11431	0.473821	0.999837	Not Sig	nonsignificant	.	.	SNF8 subunit of ESCRT-II [Source:RGD Symbol;Acc:1310144]
Mgll	chr4	302	253	87.2704	92.9622	-5.69179	0.938773	0.169056	0.823664	NotSig	-0.0868829	negligible	32.692	33.8398	31.5442	0.28119	-0.60092	0.932163	0.547893	0.999837	Not Sig	nonsignificant	.	.	monoglyceride lipase [Source:RGD Symbol;Acc:71039]
Rasgrf1	chr8	522	425	77.488	72.4598	5.02818	1.06939	0.169035	0.823664	NotSig	0.0705411	negligible	132.927	136.459	129.394	0.183706	-0.385173	0.948227	0.700109	0.999837	Not Sig	nonsignificant	.	.	RAS protein-specific guanine nucleotide-releasing factor 1 [Source:RGD Symbol;Acc:620395]
Riok2	chr1	33	22	81.4587	54.0259	27.4328	1.50777	0.169259	0.823728	NotSig	0.204888	small	6.98513	5.4286	8.54167	0.589463	0.949094	1.57346	0.342573	0.999837	Not Sig	nonsignificant	.	.	RIO kinase 2 [Source:RGD Symbol;Acc:1311588]
Fra10ac1	chr1	32	38	57.4521	81.2633	-23.8112	0.706987	0.169571	0.823728	NotSig	-0.208316	small	10.7887	13.3802	8.19724	0.465358	-1.38045	0.612639	0.167449	0.999837	Not Sig	nonsignificant	Y	Y	FRA10A associated CGG repeat 1 [Source:RGD Symbol;Acc:1309482]
LOC100361933	chr17	217	157	52.2974	57.6609	-5.36353	0.906982	0.169768	0.824113	NotSig	-0.144231	negligible	69.9298	73.5236	66.336	0.200189	-0.858293	0.902242	0.390731	0.999837	Not Sig	nonsignificant	.	.	ribosomal protein S12-like [Source:RGD Symbol;Acc:2319147]
Fh	chr13	96	105	67.8325	77.9652	-10.1326	0.870036	0.170159	0.824583	NotSig	-0.223559	small	28.0488	32.6569	23.4406	0.328748	-1.26593	0.717783	0.205539	0.999837	Not Sig	nonsignificant	.	.	fumarate hydratase [Source:RGD Symbol;Acc:2614]
Dnajc15	chr15	128	89	79.7974	90.6708	-10.8734	0.880078	0.170149	0.824583	NotSig	-0.174944	negligible	24.8366	25.4208	24.2524	0.315909	-0.222874	0.954038	0.823634	0.999837	Not Sig	nonsignificant	Y	Y	DnaJ heat shock protein family (Hsp40) member C15 [Source:RGD Symbol;Acc:1307154]
Gorasp1	chr8	52	46	85.6835	103.695	-18.0114	0.826304	0.170565	0.826108	NotSig	-0.285928	small	9.01129	9.18915	8.83344	0.538384	0.124697	0.96129	0.900764	0.999837	Not Sig	nonsignificant	.	.	golgi reassembly stacking protein 1 [Source:RGD Symbol;Acc:621122]
Ddb1	chr1	236	164	97.5863	109.023	-11.4365	0.8951	0.170826	0.826203	NotSig	-0.13658	negligible	49.9532	49.1101	50.7964	0.224736	0.213026	1.03434	0.831307	0.999837	Not Sig	nonsignificant	.	.	damage-specific DNA binding protein 1 [Source:RGD Symbol;Acc:621889]
Ola1	chr3	218	197	78.6751	88.2951	-9.62002	0.891047	0.17109	0.826519	NotSig	-0.13872	negligible	59.6795	65.4412	53.9179	0.213658	-1.30472	0.823914	0.191988	0.999837	Not Sig	nonsignificant	.	.	Obg-like ATPase 1 [Source:RGD Symbol;Acc:1307982]
Tmem101	chr10	37	23	82.5772	105.905	-23.3282	0.779726	0.171155	0.826519	NotSig	-0.320964	small	7.00325	6.81076	7.19574	0.582976	0.314409	1.05652	0.75321	0.999837	Not Sig	nonsignificant	.	.	transmembrane protein 101 [Source:RGD Symbol;Acc:1306490]
Guk1	chr10	443	293	96.1553	102.353	-6.19793	0.939446	0.171352	0.827067	NotSig	-0.11308	negligible	93.5496	83.2152	103.884	0.180661	1.59642	1.24838	0.110394	0.999837	Not Sig	nonsignificant	.	.	guanylate kinase 1 [Source:RGD Symbol;Acc:1309638]
Map7	chr1	49	36	75.3126	107.504	-32.1919	0.700553	0.172157	0.827243	NotSig	-0.263116	small	11.5516	13.1975	9.90574	0.506199	-0.758172	0.750579	0.448348	0.999837	Not Sig	nonsignificant	.	.	microtubule-associated protein 7 [Source:RGD Symbol;Acc:1308866]
Snx15	chr1	51	32	70.7056	88.7436	-18.038	0.796741	0.171905	0.827243	NotSig	-0.32886	small	10.4154	9.78645	11.0444	0.500985	0.453288	1.12854	0.650342	0.999837	Not Sig	nonsignificant	.	.	sorting nexin 15 [Source:RGD Symbol;Acc:1305803]
Ndufb10	chr10	296	245	72.7497	78.029	-5.27922	0.932343	0.173007	0.827243	NotSig	-0.0671857	negligible	66.8436	65.071	68.6163	0.219358	0.167731	1.05448	0.866795	0.999837	Not Sig	nonsignificant	.	.	NADH:ubiquinone oxidoreductase subunit B10 [Source:RGD Symbol;Acc:1310782]
Ublcp1	chr10	65	65	91.25	115.144	-23.8936	0.792489	0.172452	0.827243	NotSig	-0.216223	small	16.8536	18.5346	15.1726	0.398253	-0.768284	0.818609	0.442319	0.999837	Not Sig	nonsignificant	.	Y	ubiquitin-like domain containing CTD phosphatase 1 [Source:RGD Symbol;Acc:1310386]
Mrpl27	chr10	136	126	73.9586	69.8469	4.11171	1.05887	0.171714	0.827243	NotSig	0.131183	negligible	32.4134	33.934	30.8928	0.273971	-0.558521	0.910381	0.576489	0.999837	Not Sig	nonsignificant	.	.	mitochondrial ribosomal protein L27 [Source:RGD Symbol;Acc:1309090]
Svop	chr12	284	205	87.3294	95.1667	-7.83733	0.917646	0.173288	0.827243	NotSig	-0.156847	negligible	46.7689	44.4958	49.0421	0.284556	0.521581	1.10217	0.601962	0.999837	Not Sig	nonsignificant	.	.	SV2 related protein [Source:RGD Symbol;Acc:620277]
Aftph	chr14	75	60	99.0287	79.4344	19.5943	1.24667	0.173995	0.827243	NotSig	0.249132	small	16.1847	17.3454	15.0241	0.375574	-0.649583	0.866171	0.515961	0.999837	Not Sig	nonsignificant	.	.	aftiphilin [Source:RGD Symbol;Acc:1311920]
Pla2g12a	chr2	71	64	79.1316	92.9553	-13.8237	0.851287	0.171906	0.827243	NotSig	-0.261817	small	19.5648	20.7927	18.3369	0.351655	-0.557829	0.881893	0.576961	0.999837	Not Sig	nonsignificant	.	.	phospholipase A2, group XIIA [Source:RGD Symbol;Acc:1304662]
Ddah1	chr2	52	30	97.5616	128.784	-31.2219	0.757563	0.173093	0.827243	NotSig	-0.347839	small	6.63774	7.2446	6.03088	0.628007	-0.277874	0.832466	0.781109	0.999837	Not Sig	nonsignificant	.	.	dimethylarginine dimethylaminohydrolase 1 [Source:RGD Symbol;Acc:70968]
Fam13c	chr20	57	36	94.4909	108.165	-13.6741	0.873581	0.172381	0.827243	NotSig	-0.309259	small	11.3966	10.1136	12.6795	0.483067	0.797323	1.2537	0.425263	0.999837	Not Sig	nonsignificant	.	.	family with sequence similarity 13, member C [Source:RGD Symbol;Acc:1310149]
Usp20	chr3	120	98	93.4717	84.0264	9.44522	1.11241	0.172143	0.827243	NotSig	0.158128	negligible	15.7368	15.3961	16.0775	0.424649	0.00682589	1.04426	0.994554	0.999837	Not Sig	nonsignificant	.	.	ubiquitin specific peptidase 20 [Source:RGD Symbol;Acc:1305621]
Mapre1	chr3	176	93	92.6008	83.8504	8.75044	1.10436	0.173209	0.827243	NotSig	0.233999	small	26.0087	17.5343	34.4831	0.347517	2.33134	1.96661	0.0197352	0.923635	Not Sig	nonsignificant	.	.	microtubule-associated protein, RP/EB family, member 1 [Source:RGD Symbol;Acc:621781]
Ythdf1	chr3	104	72	76.9614	95.235	-18.2735	0.808122	0.172844	0.827243	NotSig	-0.218787	small	20.6341	19.3439	21.9243	0.376187	0.406993	1.1334	0.684013	0.999837	Not Sig	nonsignificant	.	.	YTH N(6)-methyladenosine RNA binding protein 1 [Source:RGD Symbol;Acc:1308932]
Ddost	chr5	223	189	74.1019	78.6344	-4.53256	0.942359	0.172498	0.827243	NotSig	-0.190555	negligible	52.5027	56.1606	48.8449	0.230078	-0.896022	0.869736	0.370241	0.999837	Not Sig	nonsignificant	.	.	dolichyl-diphosphooligosaccharide--protein glycosyltransferase non-catalytic subunit [Source:RGD Symbol;Acc:1308970]
Dvl1	chr5	68	57	97.5045	118.096	-20.5916	0.825637	0.173603	0.827243	NotSig	-0.266868	small	12.3697	12.8401	11.8993	0.456467	-0.0589719	0.926728	0.952974	0.999837	Not Sig	nonsignificant	.	.	dishevelled segment polarity protein 1 [Source:RGD Symbol;Acc:620632]
Mta1	chr6	137	92	77.9621	66.8425	11.1196	1.16635	0.17378	0.827243	NotSig	0.198093	negligible	28.4468	27.1698	29.7237	0.284484	0.510495	1.094	0.609705	0.999837	Not Sig	nonsignificant	.	Y	metastasis associated 1 [Source:RGD Symbol;Acc:621018]
Rdx	chr8	86	69	98.5612	82.2423	16.3188	1.19842	0.174077	0.827243	NotSig	0.190005	negligible	15.2516	16.4981	14.0051	0.435031	-0.605741	0.848892	0.544687	0.999837	Not Sig	nonsignificant	.	Y	radixin [Source:RGD Symbol;Acc:1359472]
Morf4l1	chr8	782	562	92.8241	85.3969	7.42719	1.08697	0.171608	0.827243	NotSig	0.0892783	negligible	151.629	144.952	158.306	0.156061	0.74489	1.09213	0.456338	0.999837	Not Sig	nonsignificant	.	Y	mortality factor 4 like 1 [Source:RGD Symbol;Acc:1307938]
Slc7a4	chr11	52	59	68.8774	84.0127	-15.1353	0.819845	0.174042	0.827243	NotSig	-0.3127	small	14.6276	17.0066	12.2487	0.425865	-0.998656	0.720233	0.317961	0.999837	Not Sig	nonsignificant	.	.	solute carrier family 7, member 4 [Source:RGD Symbol;Acc:1305905]
Tmem80	chr1	54	45	92.0193	106.899	-14.8799	0.860805	0.173876	0.827243	NotSig	-0.291866	small	9.97921	10.1623	9.7961	0.48077	-0.214549	0.963962	0.830119	0.999837	Not Sig	nonsignificant	.	.	transmembrane protein 80 [Source:RGD Symbol;Acc:1308399]
Npy2r	chr2	30	32	93.0156	82.5518	10.4638	1.12675	0.173979	0.827243	NotSig	0.282413	small	6.63212	9.11316	4.15108	0.697582	-1.35182	0.455504	0.176434	0.999837	Not Sig	nonsignificant	.	Y	neuropeptide Y receptor Y2 [Source:RGD Symbol;Acc:620475]
Fcho1	chr16	32	18	93.0073	123.143	-30.1353	0.755281	0.174178	0.827304	NotSig	-0.343453	small	6.36504	4.80627	7.9238	0.637315	0.97816	1.64864	0.327995	0.999837	Not Sig	nonsignificant	.	.	FCH and mu domain containing endocytic adaptor 1 [Source:RGD Symbol;Acc:1307683]
Cdc37l1	chr1	120	75	102.826	86.419	16.407	1.18985	0.174587	0.828047	NotSig	0.185765	negligible	22.8878	20.4324	25.3432	0.34034	1.02974	1.24035	0.30313	0.999837	Not Sig	nonsignificant	Y	.	cell division cycle 37-like 1 [Source:RGD Symbol;Acc:1309295]
Eloc	chr5	306	238	82.3763	90.9211	-8.54484	0.906019	0.174676	0.828069	NotSig	-0.0988465	negligible	47.2555	48.2717	46.2393	0.231885	-0.269348	0.957898	0.787662	0.999837	Not Sig	nonsignificant	.	Y	elongin C [Source:RGD Symbol;Acc:620658]
LOC103689966	chr1	31	30	75.286	95.6423	-20.3563	0.787162	0.175015	0.828478	NotSig	-0.393814	small	14.4955	14.4188	14.5722	0.429045	0.282442	1.01064	0.777605	0.999837	Not Sig	nonsignificant	.	.	MARCKS-related protein-like [Source:RGD Symbol;Acc:9082300]
Uqcrq	chr10	773	603	79.807	83.8092	-4.00227	0.952246	0.1752	0.828956	NotSig	-0.0717082	negligible	183.796	184.556	183.035	0.141272	-0.115258	0.991755	0.90824	0.999837	Not Sig	nonsignificant	.	.	ubiquinol-cytochrome c reductase, complex III subunit VII [Source:RGD Symbol;Acc:1562350]
Mypop	chr1	62	49	93.7652	74.9396	18.8256	1.25121	0.175691	0.83012	NotSig	0.297829	small	13.6435	14.6386	12.6484	0.402448	-0.436009	0.86404	0.66283	0.999837	Not Sig	nonsignificant	.	.	Myb-related transcription factor, partner of profilin [Source:RGD Symbol;Acc:1565160]
Sgms1	chr1	65	50	97.4967	82.965	14.5317	1.17515	0.175701	0.83012	NotSig	0.233583	small	12.6999	12.7571	12.6427	0.426059	-0.144226	0.991035	0.885322	0.999837	Not Sig	nonsignificant	.	Y	sphingomyelin synthase 1 [Source:RGD Symbol;Acc:727912]
Tro	chrX	227	173	92.5535	85.8989	6.65461	1.07747	0.175612	0.83012	NotSig	0.183581	negligible	18.8172	18.1292	19.5053	0.458253	0.351667	1.07591	0.725088	0.999837	Not Sig	nonsignificant	.	.	trophinin [Source:RGD Symbol;Acc:6488256]
Ankib1	chr4	54	37	90.2744	66.2684	24.006	1.36225	0.175901	0.830271	NotSig	0.29037	small	6.9764	6.61951	7.3333	0.592168	0.330314	1.10783	0.741162	0.999837	Not Sig	nonsignificant	Y	Y	ankyrin repeat and IBR domain containing 1 [Source:RGD Symbol;Acc:1597088]
Gpr107	chr3	85	52	99.4959	112.304	-12.808	0.885952	0.176094	0.830515	NotSig	-0.233476	small	8.28367	7.67807	8.88927	0.53129	0.54648	1.15775	0.584736	0.999837	Not Sig	nonsignificant	.	Y	G protein-coupled receptor 107 [Source:RGD Symbol;Acc:1305882]
Gramd1a	chr1	90	73	118.025	136.034	-18.0088	0.867615	0.176491	0.83077	NotSig	-0.232333	small	21.6978	21.7568	21.6388	0.343089	0.196013	0.994573	0.8446	0.999837	Not Sig	nonsignificant	.	.	GRAM domain containing 1A [Source:RGD Symbol;Acc:1311022]
Dlg4	chr10	686	451	87.8728	84.1333	3.73949	1.04445	0.176416	0.83077	NotSig	0.0636205	negligible	120.664	109.128	132.201	0.22881	1.05656	1.21143	0.290715	0.999837	Not Sig	nonsignificant	.	.	discs large MAGUK scaffold protein 4 [Source:RGD Symbol;Acc:68424]
Mfap3l	chr16	175	124	89.815	77.9774	11.8377	1.15181	0.176498	0.83077	NotSig	0.157166	negligible	11.0197	11.4686	10.5708	0.567189	-0.301239	0.921712	0.763232	0.999837	Not Sig	nonsignificant	.	Y	microfibril associated protein 3 like [Source:RGD Symbol;Acc:1311274]
Plbd2	chr12	119	113	96.4837	107.541	-11.0574	0.89718	0.176883	0.831848	NotSig	-0.175175	negligible	29.567	32.1724	26.9617	0.291914	-0.825067	0.838037	0.409334	0.999837	Not Sig	nonsignificant	.	.	phospholipase B domain containing 2 [Source:RGD Symbol;Acc:708461]
Nab2	chr7	47	16	82.0915	61.1152	20.9763	1.34322	0.176961	0.831848	NotSig	0.30963	small	7.39644	5.05378	9.7391	0.732004	1.31952	1.92709	0.186995	0.999837	Not Sig	nonsignificant	.	.	Ngfi-A binding protein 2 [Source:RGD Symbol;Acc:1311712]
Ubxn6	chr9	106	72	90.5415	76.3462	14.1953	1.18593	0.176996	0.831848	NotSig	0.187071	negligible	21.1468	19.6968	22.5968	0.344559	0.550727	1.14723	0.581821	0.999837	Not Sig	nonsignificant	.	.	UBX domain protein 6 [Source:RGD Symbol;Acc:1590866]
Kctd12	chr15	243	183	95.7971	90.7843	5.0128	1.05522	0.177306	0.832392	NotSig	0.118215	negligible	11.3549	10.9153	11.7945	0.528676	-0.0869354	1.08055	0.930723	0.999837	Not Sig	nonsignificant	Y	Y	potassium channel tetramerization domain containing 12 [Source:RGD Symbol;Acc:1309421]
Clcn4	chrX	132	120	97.5571	87.4656	10.0914	1.11538	0.177366	0.832392	NotSig	0.15026	negligible	21.4261	23.6708	19.1814	0.341025	-0.977184	0.810341	0.328478	0.999837	Not Sig	nonsignificant	.	.	chloride voltage-gated channel 4 [Source:RGD Symbol;Acc:708381]
Igdcc4	chr8	95	83	98.1658	114.282	-16.1162	0.858979	0.177452	0.832398	NotSig	-0.183125	negligible	13.5143	14.8914	12.1371	0.416382	-0.783555	0.815036	0.433301	0.999837	Not Sig	nonsignificant	.	Y	immunoglobulin superfamily, DCC subclass, member 4 [Source:RGD Symbol;Acc:1310919]
Dnpep	chr9	109	86	102.885	90.019	12.8657	1.14292	0.177611	0.832746	NotSig	0.200287	small	24.7004	23.107	26.2937	0.319247	0.484016	1.13791	0.628374	0.999837	Not Sig	nonsignificant	.	.	aspartyl aminopeptidase [Source:RGD Symbol;Acc:1583848]
Mia3	chr13	61	49	88.9974	101.107	-12.1099	0.880227	0.177906	0.832992	NotSig	-0.285693	small	14.0826	16.1274	12.0379	0.419641	-0.849758	0.746425	0.39546	0.999837	Not Sig	nonsignificant	.	.	MIA SH3 domain ER export factor 3 [Source:RGD Symbol;Acc:1591600]
Rps19l2	chr1	900	772	50.3702	52.8228	-2.45262	0.953569	0.179378	0.833256	NotSig	-0.0581805	negligible	51.423	56.8347	46.0113	0.264012	-1.30243	0.809562	0.192769	0.999837	Not Sig	nonsignificant	.	.
Gng3	chr1	477	374	89.2173	91.6621	-2.4448	0.973328	0.179689	0.833256	NotSig	-0.0642751	negligible	97.7934	101.334	94.2524	0.198482	-0.330933	0.930113	0.740695	0.999837	Not Sig	nonsignificant	.	.	G protein subunit gamma 3 [Source:RGD Symbol;Acc:620805]
Eif4g1	chr11	288	196	78.6294	73.3081	5.3213	1.07259	0.180017	0.833256	NotSig	0.150904	negligible	45.3163	45.0863	45.5463	0.255757	0.223361	1.0102	0.823254	0.999837	Not Sig	nonsignificant	.	.	eukaryotic translation initiation factor 4 gamma 1 [Source:RGD Symbol;Acc:1306144]
Nudcd3	chr14	170	165	93.8785	107.047	-13.168	0.876988	0.178786	0.833256	NotSig	-0.147336	negligible	22.6599	26.0692	19.2506	0.402303	-0.971964	0.738443	0.331069	0.999837	Not Sig	nonsignificant	.	Y	NudC domain containing 3 [Source:RGD Symbol;Acc:1642416]
Edc4	chr19	85	57	101.576	83.6367	17.9393	1.21449	0.178178	0.833256	NotSig	0.239819	small	18.325	15.4058	21.2443	0.360975	1.12218	1.37898	0.261785	0.999837	Not Sig	nonsignificant	.	.	enhancer of mRNA decapping 4 [Source:RGD Symbol;Acc:1562009]
Ypel4	chr3	78	51	127.12	157.872	-30.7522	0.805208	0.179727	0.833256	NotSig	-0.242564	small	15.8639	16.311	15.4167	0.403924	-0.142911	0.945167	0.88636	0.999837	Not Sig	nonsignificant	.	Y	yippee-like 4 [Source:RGD Symbol;Acc:1560142]
Cd59	chr3	244	164	86.2237	95.0757	-8.85197	0.906896	0.178405	0.833256	NotSig	-0.120621	negligible	46.1191	42.8976	49.3405	0.233642	0.731517	1.15019	0.464463	0.999837	Not Sig	nonsignificant	.	.	CD59 molecule [Source:RGD Symbol;Acc:2311]
Kdm3a	chr4	20	24	85.3954	108.686	-23.291	0.785704	0.179063	0.833256	NotSig	-0.309078	small	6.13241	7.81651	4.44831	0.607173	-1.13502	0.569091	0.256366	0.999837	Not Sig	nonsignificant	.	.	lysine demethylase 3A [Source:RGD Symbol;Acc:708351]
Strn3	chr6	61	41	101.001	74.7163	26.2847	1.35179	0.179857	0.833256	NotSig	0.232886	small	11.8018	11.4623	12.1414	0.438976	0.136335	1.05925	0.891556	0.999837	Not Sig	nonsignificant	.	Y	striatin 3 [Source:RGD Symbol;Acc:621827]
Trim9	chr6	225	126	106.669	90.0084	16.6606	1.1851	0.180228	0.833256	NotSig	0.0934903	negligible	33.7006	28.6937	38.7074	0.324416	1.23403	1.34899	0.217191	0.999837	Not Sig	nonsignificant	.	.	tripartite motif-containing 9 [Source:RGD Symbol;Acc:621540]
Dnaja4	chr8	254	185	89.3421	96.1376	-6.79547	0.929315	0.179591	0.833256	NotSig	-0.12064	negligible	38.1804	38.3737	37.9871	0.263553	-0.165505	0.989924	0.868547	0.999837	Not Sig	nonsignificant	.	.	DnaJ heat shock protein family (Hsp40) member A4 [Source:RGD Symbol;Acc:1310035]
ND5	chrM	2942	2633	42.3182	42.6734	-0.35513	0.991678	0.179774	0.833256	NotSig	-0.0373786	negligible	504.941	513.865	496.018	0.505617	-0.104472	0.96527	0.916795	0.999837	Not Sig	nonsignificant	.	.	mitochondrially encoded NADH:ubiquinone oxidoreductase core subunit 5 [Source:RGD Symbol;Acc:620560]
Frmpd4	chrX	74	71	122.913	99.6074	23.3061	1.23398	0.178681	0.833256	NotSig	0.203124	small	8.73988	8.88737	8.5924	0.511398	-0.111937	0.96681	0.910873	0.999837	Not Sig	nonsignificant	.	Y	FERM and PDZ domain containing 4 [Source:RGD Symbol;Acc:1566031]
Cdc16	chr16	41	39	112.115	84.4721	27.6433	1.32725	0.179319	0.833256	NotSig	0.221283	small	10.4105	11.13	9.69103	0.46989	-0.654119	0.870715	0.513035	0.999837	Not Sig	nonsignificant	.	.	cell division cycle 16 [Source:RGD Symbol;Acc:1305076]
Ggh	chr5	108	84	66.1579	80.1632	-14.0053	0.825291	0.178825	0.833256	NotSig	-0.192833	negligible	24.8319	24.1207	25.5431	0.311289	0.146022	1.05897	0.883904	0.999837	Not Sig	nonsignificant	.	.	gamma-glutamyl hydrolase [Source:RGD Symbol;Acc:2682]
Arvcf	chr11	29	24	105.132	80.9364	24.1957	1.29895	0.180164	0.833256	NotSig	0.327771	small	6.16253	5.48233	6.84272	0.603621	0.264312	1.24814	0.79154	0.999837	Not Sig	nonsignificant	.	.	ARVCF, delta catenin family member [Source:RGD Symbol;Acc:1306655]
Itgav	chr3	43	41	142.318	115.347	26.9712	1.23383	0.180926	0.834754	NotSig	0.273209	small	6.71684	7.45227	5.98141	0.590042	-0.784026	0.802629	0.433025	0.999837	Not Sig	nonsignificant	.	Y	integrin subunit alpha V [Source:RGD Symbol;Acc:1310613]
U2af1	chr20	113	73	83.3173	70.2462	13.0711	1.18608	0.181073	0.835042	NotSig	0.142267	negligible	25.2921	21.8998	28.6844	0.3285	1.05095	1.3098	0.293281	0.999837	Not Sig	nonsignificant	.	.	U2 small nuclear RNA auxiliary factor 1 [Source:RGD Symbol;Acc:1584190]
Gpc5	chr15	54	38	104.65	120.426	-15.776	0.868998	0.181431	0.835649	NotSig	-0.214038	small	24.3503	23.9986	24.702	0.320864	0.231565	1.02931	0.816876	0.999837	Not Sig	nonsignificant	.	.	glypican 5 [Source:RGD Symbol;Acc:1308835]
Cacna1a	chr19	141	97	89.5882	105.682	-16.0936	0.847717	0.181715	0.835649	NotSig	-0.155726	negligible	28.1847	25.6222	30.7471	0.29209	0.813978	1.20002	0.415658	0.999837	Not Sig	nonsignificant	.	.	calcium voltage-gated channel subunit alpha1 A [Source:RGD Symbol;Acc:2244]
Pdcd6ip	chr8	82	56	81.6758	101.528	-19.8527	0.804462	0.181709	0.835649	NotSig	-0.217462	small	8.32842	10.0964	6.56043	0.56294	-0.833435	0.649779	0.404599	0.999837	Not Sig	nonsignificant	.	.	programmed cell death 6 interacting protein [Source:RGD Symbol;Acc:68357]
Tapt1	chr14	47	53	93.835	69.5929	24.2422	1.34834	0.181401	0.835649	NotSig	0.292508	small	9.57253	9.6439	9.50116	0.506739	-0.271942	0.985199	0.785667	0.999837	Not Sig	nonsignificant	.	Y	transmembrane anterior posterior transformation 1 [Source:RGD Symbol;Acc:1309656]
Sdha	chr1	260	255	95.4591	105.635	-10.1764	0.903665	0.18237	0.83749	NotSig	-0.0955404	negligible	63.2041	68.0333	58.3748	0.213345	-1.08062	0.858033	0.279864	0.999837	Not Sig	nonsignificant	.	.	succinate dehydrogenase complex flavoprotein subunit A [Source:RGD Symbol;Acc:621557]
Exoc6	chr1	66	46	74.5004	93.3753	-18.8749	0.797859	0.182295	0.83749	NotSig	-0.17818	negligible	12.625	11.4042	13.8457	0.461177	0.424573	1.21409	0.671148	0.999837	Not Sig	nonsignificant	.	.	exocyst complex component 6 [Source:RGD Symbol;Acc:3653]
Tmf1	chr4	74	55	100.817	76.4984	24.3187	1.3179	0.182366	0.83749	NotSig	0.180278	negligible	9.12095	8.98001	9.26189	0.514185	0.107624	1.03139	0.914294	0.999837	Not Sig	nonsignificant	.	Y	TATA element modulatory factor 1 [Source:RGD Symbol;Acc:620551]
Nsmce1	chr1	43	23	78.2912	94.1503	-15.859	0.831556	0.182746	0.83765	NotSig	-0.358608	small	7.72827	5.17765	10.2789	0.56009	1.51862	1.98524	0.128858	0.999837	Not Sig	nonsignificant	.	.	NSE1 homolog, SMC5-SMC6 complex component [Source:RGD Symbol;Acc:1307760]
Gfod1	chr17	181	113	95.1326	83.0777	12.0549	1.1451	0.182615	0.83765	NotSig	0.154703	negligible	7.82768	6.94681	8.70856	0.593399	0.703666	1.25361	0.481641	0.999837	Not Sig	nonsignificant	Y	.	glucose-fructose oxidoreductase domain containing 1 [Source:RGD Symbol;Acc:1311507]
Rmnd5a	chr4	120	94	101.048	86.5163	14.5314	1.16796	0.182704	0.83765	NotSig	0.221355	small	13.4356	12.5565	14.3147	0.419655	0.292419	1.14003	0.769966	0.999837	Not Sig	nonsignificant	Y	.	required for meiotic nuclear division 5 homolog A [Source:RGD Symbol;Acc:1309766]
Pes1	chr14	40	50	76.3375	88.9831	-12.6455	0.857889	0.182929	0.838096	NotSig	-0.301654	small	12.5392	14.5421	10.5363	0.467211	-1.06835	0.724534	0.285362	0.999837	Not Sig	nonsignificant	.	.	pescadillo ribosomal biogenesis factor 1 [Source:RGD Symbol;Acc:1559814]
Rbm26	chr15	43	28	119.776	86.6355	33.1402	1.38252	0.18366	0.838321	NotSig	0.363546	small	6.89196	5.71779	8.06613	0.628765	0.502149	1.41071	0.615563	0.999837	Not Sig	nonsignificant	Y	Y	RNA binding motif protein 26 [Source:RGD Symbol;Acc:1308297]
Pcnx2	chr19	52	41	81.6234	104.249	-22.6253	0.782968	0.183178	0.838321	NotSig	-0.299301	small	11.1073	11.5817	10.6328	0.445654	-0.312296	0.918074	0.754815	0.999837	Not Sig	nonsignificant	.	.	pecanex 2 [Source:RGD Symbol;Acc:1305883]
Trim23	chr2	110	86	100.015	102.119	-2.10383	0.979398	0.183191	0.838321	NotSig	-0.236481	small	19.3005	20.5946	18.0064	0.377688	-0.441425	0.874326	0.658905	0.999837	Not Sig	nonsignificant	.	Y	tripartite motif-containing 23 [Source:RGD Symbol;Acc:621587]
Lmna	chr2	74	47	86.1307	71.2107	14.92	1.20952	0.183646	0.838321	NotSig	0.230141	small	14.4092	14.3878	14.4307	0.42565	0.0851023	1.00298	0.93218	0.999837	Not Sig	nonsignificant	.	Y	lamin A/C [Source:RGD Symbol;Acc:620456]
Cnnm2	chr1	38	37	67.8236	87.1618	-19.3381	0.778135	0.183507	0.838321	NotSig	-0.271873	small	6.17241	7.67899	4.66583	0.632625	-1.15824	0.60761	0.246767	0.999837	Not Sig	nonsignificant	Y	.	cyclin and CBS domain divalent metal cation transport mediator 2 [Source:RGD Symbol;Acc:1308162]
Ppp6r1	chr1	188	122	104.336	91.2897	13.0459	1.14291	0.183899	0.838632	NotSig	0.109669	negligible	34.3163	35.0836	33.549	0.29261	-0.115718	0.95626	0.907876	0.999837	Not Sig	nonsignificant	.	.	protein phosphatase 6, regulatory subunit 1 [Source:RGD Symbol;Acc:1311409]
Srebf2	chr7	346	244	93.8924	105.108	-11.2155	0.893295	0.183995	0.838682	NotSig	-0.105883	negligible	46.3526	43.6596	49.0457	0.250242	0.450557	1.12337	0.652309	0.999837	Not Sig	nonsignificant	.	.	sterol regulatory element binding transcription factor 2 [Source:RGD Symbol;Acc:1307751]
Ptges3	chr7	425	307	89.1537	83.0118	6.14182	1.07399	0.184352	0.839221	NotSig	0.102021	negligible	91.1796	87.2553	95.1039	0.195095	0.567681	1.08995	0.570252	0.999837	Not Sig	nonsignificant	.	.	prostaglandin E synthase 3 [Source:RGD Symbol;Acc:1561913]
Cntnap1	chr10	230	195	142.89	155.512	-12.622	0.918835	0.184479	0.839335	NotSig	-0.146559	negligible	38.2102	38.3447	38.0757	0.275796	-0.019143	0.992987	0.984727	0.999837	Not Sig	nonsignificant	.	.	contactin associated protein 1 [Source:RGD Symbol;Acc:70902]
Nell1	chr1	77	84	76.9277	95.5459	-18.6182	0.805139	0.18518	0.839663	NotSig	-0.192117	negligible	24.245	29.0237	19.4663	0.343693	-1.49437	0.670703	0.13508	0.999837	Not Sig	nonsignificant	.	Y	neural EGFL like 1 [Source:RGD Symbol;Acc:620998]
Ubqln1	chr17	234	192	84.6932	91.3877	-6.69443	0.926747	0.184981	0.839663	NotSig	-0.149616	negligible	43.0866	41.8049	44.3684	0.262494	0.201201	1.06132	0.840541	0.999837	Not Sig	nonsignificant	.	.	ubiquilin 1 [Source:RGD Symbol;Acc:620745]
Smg5	chr2	58	43	124.448	144.989	-20.5419	0.858322	0.184956	0.839663	NotSig	-0.226905	small	10.2574	8.72538	11.7894	0.493618	0.747435	1.35117	0.454801	0.999837	Not Sig	nonsignificant	.	.	SMG5 nonsense mediated mRNA decay factor [Source:RGD Symbol;Acc:1584731]
Prep	chr20	43	50	87.7019	107.644	-19.9421	0.81474	0.184996	0.839663	NotSig	-0.317793	small	11.628	13.8425	9.41341	0.449184	-1.30435	0.680035	0.192113	0.999837	Not Sig	nonsignificant	.	.	prolyl endopeptidase [Source:RGD Symbol;Acc:620841]
Polr3k	chr3	133	71	90.8164	102.362	-11.5453	0.887211	0.184883	0.839663	NotSig	-0.244802	small	26.3729	22.605	30.1408	0.307051	1.43766	1.33337	0.15053	0.999837	Not Sig	nonsignificant	.	.	RNA polymerase III subunit K [Source:RGD Symbol;Acc:1587294]
Rtn1	chr6	1929	1500	96.267	99.6873	-3.42033	0.965689	0.185173	0.839663	NotSig	-0.0626883	negligible	443.386	441.089	445.684	0.108515	0.13052	1.01042	0.896155	0.999837	Not Sig	nonsignificant	.	Y	reticulon 1 [Source:RGD Symbol;Acc:620986]
Dpy30	chr6	76	62	85.0465	72.569	12.4775	1.17194	0.185929	0.841256	NotSig	0.266078	small	18.9559	19.6573	18.2545	0.391269	-0.308605	0.928636	0.757622	0.999837	Not Sig	nonsignificant	Y	.	dpy-30 histone methyltransferase complex regulatory subunit [Source:RGD Symbol;Acc:708575]
Tfg	chr11	86	74	82.9444	92.9069	-9.96253	0.892769	0.185919	0.841256	NotSig	-0.233066	small	19.7699	20.7121	18.8277	0.355802	-0.249685	0.909019	0.802831	0.999837	Not Sig	nonsignificant	.	.	trafficking from ER to golgi regulator [Source:RGD Symbol;Acc:1309751]
Acd	chr19	40	31	150.42	126.695	23.7245	1.18726	0.186253	0.841887	NotSig	0.421382	small	10.6795	11.0422	10.3169	0.521537	-0.0513824	0.934311	0.959021	0.999837	Not Sig	nonsignificant	.	.	ACD, shelterin complex subunit and telomerase recruitment factor [Source:RGD Symbol;Acc:1565053]
Clk3	chr8	42	37	120.868	93.3011	27.5669	1.29546	0.186325	0.841887	NotSig	0.341591	small	10.1745	11.5012	8.84784	0.474684	-0.736827	0.769296	0.461228	0.999837	Not Sig	nonsignificant	.	.	CDC-like kinase 3 [Source:RGD Symbol;Acc:621259]
Tmem38a	chr16	228	209	80.1192	88.4515	-8.33235	0.905797	0.186527	0.842411	NotSig	-0.126662	negligible	42.3367	43.4602	41.2131	0.252368	-0.384861	0.948295	0.70034	0.999837	Not Sig	nonsignificant	.	.	transmembrane protein 38a [Source:RGD Symbol;Acc:1307901]
Mettl23	chr10	38	25	89.6883	118.872	-29.1838	0.754494	0.186618	0.842439	NotSig	-0.39667	small	8.81525	7.20212	10.4284	0.506004	1.05854	1.44796	0.289807	0.999837	Not Sig	nonsignificant	.	Y	methyltransferase like 23 [Source:RGD Symbol;Acc:1306284]
Mrpl48	chr1	149	107	70.9073	80.4111	-9.50387	0.881809	0.191613	0.842609	NotSig	-0.200035	small	31.5982	30.7145	32.482	0.284356	0.174776	1.05755	0.861255	0.999837	Not Sig	nonsignificant	.	.	mitochondrial ribosomal protein L48 [Source:RGD Symbol;Acc:1307576]
Shank2	chr1	96	78	82.4678	106.667	-24.1995	0.773131	0.189052	0.842609	NotSig	-0.149734	negligible	7.51402	7.19868	7.82935	0.563182	0.350951	1.08761	0.725625	0.999837	Not Sig	nonsignificant	Y	Y	SH3 and multiple ankyrin repeat domains 2 [Source:RGD Symbol;Acc:628772]
Ppp1r3c	chr1	71	52	82.9412	64.0866	18.8547	1.29421	0.187363	0.842609	NotSig	0.236077	small	8.88541	7.75099	10.0198	0.548869	0.38158	1.29272	0.702773	0.999837	Not Sig	nonsignificant	.	Y	protein phosphatase 1, regulatory subunit 3C [Source:RGD Symbol;Acc:1309132]
Twnk	chr1	32	22	72.9088	97.783	-24.8742	0.745619	0.189602	0.842609	NotSig	-0.374433	small	6.41966	6.24469	6.59463	0.602003	0.286795	1.05604	0.774269	0.999837	Not Sig	nonsignificant	.	.	twinkle mtDNA helicase [Source:RGD Symbol;Acc:1307884]
Rhot2	chr10	53	38	123.843	92.1429	31.6998	1.34403	0.190941	0.842609	NotSig	0.23834	small	10.6599	10.1225	11.1973	0.455646	0.195788	1.10618	0.844776	0.999837	Not Sig	nonsignificant	.	.	ras homolog family member T2 [Source:RGD Symbol;Acc:727970]
Rundc1	chr10	81	48	102.418	86.6535	15.7645	1.18193	0.187464	0.842609	NotSig	0.170579	negligible	10.0294	10.035	10.0238	0.47921	0.138039	0.998884	0.890209	0.999837	Not Sig	nonsignificant	.	.	RUN domain containing 1 [Source:RGD Symbol;Acc:1307490]
Ndufaf8	chr10	102	67	62.7072	72.934	-10.2268	0.85978	0.192454	0.842609	NotSig	-0.207071	small	22.3192	22.039	22.5994	0.332895	0.158167	1.02543	0.874325	0.999837	Not Sig	nonsignificant	.	.
[truncated: 5,028 more rows]

## Sheet: DRS_60min
gene_name	chrom	Ipsi_60min_counts	Contra_60min_counts	Ipsi_60min_polya_gm_mean	Contra_60min_polya_gm_mean	polya_length_diff	polya_fold_change	polya_pvalue	polya_padj	polya_sig	polya_cohen_d	polya_effect_size	diffexp_baseMean	diffexp_baseMean_1	diffexp_baseMean_2	diffexp_lfcSE	diffexp_stat	diffexp_fold_change	diffexp_pvalue	diffexp_padj	diffexp_sig	diffexp_effect	cpeb1	cpeb2	gene_description
[truncated: 9,225 more rows]

[truncated: 6 more sheets: GO_up_polya_10min, GO_up_polya_60min, GO_up_diffexp_10min, GO_up_diffexp_60min, GO_up_CPEB_10min, GO_up_CPEB_60min]
