# Supplementary material
Source: HighWire-hosted journal article supplement (doi:10.1101/rna.080485.125)
Supplement: Supplementary_Table_3.xlsx [file Supplementary_Table_3.xlsx]

## Sheet: cDNA_10min
gene_name	chrom	Ipsi_10min_counts	Contra_10min_counts	Ipsi_10min_polya_gm_mean	Contra_10min_polya_gm_mean	polya_length_diff	polya_fold_change	polya_pvalue	polya_padj	polya_sig	polya_cohen_d	polya_effect_size	diffexp_baseMean	diffexp_baseMean_1	diffexp_baseMean_2	diffexp_lfcSE	diffexp_stat	diffexp_fold_change	diffexp_pvalue	diffexp_padj	diffexp_sig	diffexp_effect	cpeb1	cpeb2	gene_description
Actb	chr12	112867	51652	113.646	97.1105	16.5353	1.17027	0	0	FDR<0.05	0.295589	small	19641.3	15832.7	23450	0.205054	2.76302	1.48112	0.00572698	0.704772	Not Sig	nonsignificant	Y	.	actin, beta [Source:RGD Symbol;Acc:628837]
Tpt1	chr15	41996	9834	92.3148	65.1919	27.1228	1.41605	0	0	FDR<0.05	0.48194	small	5373.84	3018.27	7729.42	0.830211	1.63431	2.56088	0.102194	0.999945	Not Sig	nonsignificant	.	.	tumor protein, translationally-controlled 1 [Source:RGD Symbol;Acc:621623]
Nrn1	chr17	22333	6577	127.252	83.2511	44.0008	1.52853	0	0	FDR<0.05	0.583224	medium	3212.18	1965.07	4459.28	0.262374	4.50397	2.26927	6.6695e-06	0.00242332	FDR<0.05	upregulated	Y	.	neuritin 1 [Source:RGD Symbol;Acc:621586]
LOC100360087	chr5	32999	11021	106.724	77.8974	28.8267	1.37006	0	0	FDR<0.05	0.463911	small	6211.8	3824.87	8598.73	0.223005	5.24158	2.24811	1.59203e-07	8.04807e-05	FDR<0.05	upregulated	.	.	ferritin light chain 1-like [Source:RGD Symbol;Acc:2322860]
Rpl41	chr7	82205	35958	89.1448	71.8515	17.2933	1.24068	0	0	FDR<0.05	0.338495	small	678.394	616.829	739.959	0.247188	1.07409	1.19962	0.282783	0.999945	Not Sig	nonsignificant	.	.
Tuba1a	chr7	81674	39036	103.238	88.4734	14.7643	1.16688	0	0	FDR<0.05	0.26164	small	12741	10576.1	14906	0.216936	2.28079	1.40941	0.0225607	0.999945	Not Sig	nonsignificant	.	.	tubulin, alpha 1A [Source:RGD Symbol;Acc:619717]
Dnaja1	chr5	17841	5583	141.176	100.256	40.9196	1.40815	1.0826e-271	1.0826e-271	FDR<0.05	0.5127	medium	2530.33	1636.53	3424.13	0.285963	3.72242	2.09231	0.000197321	0.0402499	FDR<0.05	upregulated	.	.	DnaJ heat shock protein family (Hsp40) member A1 [Source:RGD Symbol;Acc:620942]
Ckb	chr6	73737	36439	114.774	101.897	12.8777	1.12638	3.45956e-270	3.45956e-270	FDR<0.05	0.226317	small	12838.1	11059.7	14616.4	0.208967	1.92524	1.32159	0.0541987	0.999945	Not Sig	nonsignificant	.	.	creatine kinase B [Source:RGD Symbol;Acc:2357]
Ptma	chr9	17631	6374	113.421	81.1512	32.2701	1.39765	5.64417e-236	5.64417e-236	FDR<0.05	0.456766	small	2668.56	1873.73	3463.38	0.230807	3.83767	1.84838	0.000124206	0.027248	FDR<0.05	nonsignificant	.	Y
Ubc	chr12	22405	8464	127.949	98.1947	29.7541	1.30301	5.86078e-228	5.86078e-228	FDR<0.05	0.39035	small	2799.32	2003.56	3595.09	0.252709	3.33	1.79435	0.000868473	0.150712	Not Sig	nonsignificant	.	.	ubiquitin C [Source:RGD Symbol;Acc:621244]
Ubb	chr10	123133	70582	109.498	101.491	8.00738	1.0789	7.50811e-225	7.50811e-225	FDR<0.05	0.157579	negligible	23039.9	21026.5	25053.2	0.205049	1.23221	1.1915	0.217871	0.999945	Not Sig	nonsignificant	.	.	ubiquitin B [Source:RGD Symbol;Acc:621562]
Hspa8	chr8	52773	26611	87.4655	74.1865	13.279	1.17899	4.45758e-217	4.45758e-217	FDR<0.05	0.237651	small	7997.44	6600.79	9394.09	0.208903	2.43552	1.42318	0.0148704	0.999945	Not Sig	nonsignificant	.	.	heat shock protein family A (Hsp70) member 8 [Source:RGD Symbol;Acc:621725]
Cfl1	chr1	65935	36244	109.114	99.0083	10.1055	1.10207	2.41707e-195	2.41707e-195	FDR<0.05	0.212034	small	11849.4	10686.2	13012.7	0.206684	1.37431	1.21771	0.169346	0.999945	Not Sig	nonsignificant	.	.	cofilin 1 [Source:RGD Symbol;Acc:69285]
Prdx5	chr1	12972	5348	124.201	93.6859	30.5155	1.32572	5.9587e-177	5.9587e-177	FDR<0.05	0.453323	small	2027.67	1567.82	2487.53	0.243041	2.73848	1.58662	0.00617245	0.732317	Not Sig	nonsignificant	.	.	peroxiredoxin 5 [Source:RGD Symbol;Acc:71007]
Dstnl1	chr20	7614	1576	154.038	94.5562	59.482	1.62907	6.88119e-164	6.88119e-164	FDR<0.05	0.722183	medium	244.426	124.954	363.897	0.349292	4.39765	2.91224	1.09429e-05	0.00353427	FDR<0.05	upregulated	.	.
Dstn	chr3	7981	2152	159.543	108.037	51.5066	1.47675	4.63311e-161	4.63311e-161	FDR<0.05	0.621467	medium	1862.68	957.01	2768.36	0.290318	5.27168	2.89271	1.3518e-07	7.14429e-05	FDR<0.05	upregulated	.	.	destrin, actin depolymerizing factor [Source:RGD Symbol;Acc:1588366]
LOC100361457	chr3	47103	23423	108.65	96.7863	11.8637	1.12258	1.33203e-151	1.33203e-151	FDR<0.05	0.198278	negligible	11017.4	9118.19	12916.7	0.207179	2.42367	1.41658	0.0153646	0.999945	Not Sig	nonsignificant	.	Y	actin, gamma 1 propeptide-like [Source:RGD Symbol;Acc:2320108]
Mt1	chr19	36035	2563	161.333	125.225	36.1082	1.28835	2.14507e-124	2.14507e-124	FDR<0.05	0.502111	medium	264.261	90.3361	438.186	0.321692	7.14121	4.85062	9.25121e-13	9.77853e-10	FDR<0.05	upregulated	.	.	metallothionein 1 [Source:RGD Symbol;Acc:3117]
Sat1	chrX	13945	3741	177.867	135.243	42.6242	1.31517	5.33519e-108	5.33519e-108	FDR<0.05	0.3653	small	2053.94	1153.52	2954.36	0.219669	6.16691	2.56116	6.96383e-10	5.3979e-07	FDR<0.05	upregulated	.	.	spermidine/spermine N1-acetyl transferase 1 [Source:RGD Symbol;Acc:1586174]
Hspa5	chr3	10123	3805	110.845	83.4069	27.4383	1.32897	1.87402e-98	1.87402e-98	FDR<0.05	0.366356	small	1556.74	1140.72	1972.76	0.246866	3.19695	1.7294	0.00138889	0.212248	Not Sig	nonsignificant	.	.	heat shock protein family A (Hsp70) member 5 [Source:RGD Symbol;Acc:2843]
Arf4	chr16	6309	1422	155.439	101.488	53.951	1.5316	3.75931e-98	3.75931e-98	FDR<0.05	0.60197	medium	789.383	405.627	1173.14	0.64337	2.38193	2.89216	0.0172223	0.999945	Not Sig	nonsignificant	.	.	ADP-ribosylation factor 4 [Source:RGD Symbol;Acc:621275]
Arpp21	chr8	4611	1507	131.256	82.7418	48.5141	1.58633	4.21681e-90	4.21681e-90	FDR<0.05	0.592912	medium	591.366	430.266	752.465	0.292844	2.75915	1.74884	0.00579515	0.704772	Not Sig	nonsignificant	.	Y	cAMP regulated phosphoprotein 21 [Source:RGD Symbol;Acc:1593239]
Ddit3	chr7	8039	1129	141.014	93.9358	47.0781	1.50117	3.30397e-89	3.30397e-89	FDR<0.05	0.611965	medium	946.233	347.288	1545.18	0.613676	3.50942	4.44927	0.000449086	0.0828446	Not Sig	nonsignificant	.	.	DNA-damage inducible transcript 3 [Source:RGD Symbol;Acc:62391]
Ftl1	chr1	12839	2600	165.829	132.509	33.3202	1.25146	6.4767e-89	6.4767e-89	FDR<0.05	0.392293	small	294.253	207.461	381.044	0.265067	3.31313	1.8367	0.000922577	0.15324	Not Sig	nonsignificant	.	.	ferritin light chain 1 [Source:RGD Symbol;Acc:61813]
LOC689955	chr6	28998	14980	95.2312	85.0941	10.1371	1.11913	4.28108e-83	4.28108e-83	FDR<0.05	0.18216	negligible	2899.97	2521.53	3278.41	0.268079	1.40666	1.30017	0.159528	0.999945	Not Sig	nonsignificant	.	.
Tmsb4x	chrX	133318	76149	97.6401	93.2905	4.34965	1.04662	1.25459e-69	1.25459e-69	FDR<0.05	0.0946653	negligible	24592.5	22677.9	26507	0.192757	1.16756	1.16885	0.242986	0.999945	Not Sig	nonsignificant	.	.	thymosin beta 4, X-linked [Source:RGD Symbol;Acc:621622]
Actg1	chr10	25292	10766	134.548	123.144	11.4033	1.0926	4.60513e-66	4.60513e-66	FDR<0.05	0.166871	negligible	869.745	609.583	1129.91	0.221983	3.99986	1.85357	6.3379e-05	0.0167479	FDR<0.05	nonsignificant	.	Y	actin, gamma 1 [Source:RGD Symbol;Acc:1304556]
Nefl	chr15	4682	1425	134.813	100.95	33.8632	1.33545	1.77058e-58	1.77058e-58	FDR<0.05	0.454345	small	310.089	164.779	455.399	0.75256	1.95083	2.76369	0.0510774	0.999945	Not Sig	nonsignificant	.	.	neurofilament light chain [Source:RGD Symbol;Acc:621458]
Scg2	chr9	12035	5737	116.303	99.2057	17.0978	1.17235	2.53514e-56	2.53514e-56	FDR<0.05	0.272332	small	2127.99	1758.82	2497.15	0.240797	2.09527	1.41979	0.0361471	0.999945	Not Sig	nonsignificant	.	.	secretogranin II [Source:RGD Symbol;Acc:3626]
Cx3cl1	chr19	3955	805	136.587	96.2716	40.3157	1.41877	5.94133e-56	5.94133e-56	FDR<0.05	0.552668	medium	78.8031	25.4259	132.18	0.528931	4.4335	5.19865	9.27145e-06	0.00317056	FDR<0.05	upregulated	.	Y	C-X3-C motif chemokine ligand 1 [Source:RGD Symbol;Acc:620458]
Napa	chr1	15188	9084	95.3917	111.321	-15.9298	0.856903	2.14899e-48	2.14899e-48	FDR<0.05	-0.191485	negligible	2888.39	2750.48	3026.3	0.20524	0.668552	1.10028	0.503782	0.999945	Not Sig	nonsignificant	.	.	NSF attachment protein alpha [Source:RGD Symbol;Acc:620855]
Bdnf	chr3	3545	539	127.742	75.4211	52.3212	1.69372	1.70032e-47	1.70032e-47	FDR<0.05	0.596823	medium	65.6462	10.7884	120.504	0.62805	5.43741	11.1698	5.406e-08	3.14278e-05	FDR<0.05	upregulated	Y	.	brain-derived neurotrophic factor [Source:RGD Symbol;Acc:2202]
Rheb	chr4	2718	614	147.156	98.5897	48.5664	1.49261	5.13257e-46	5.13257e-46	FDR<0.05	0.609953	medium	350.975	192.769	509.18	0.905978	1.54847	2.6414	0.12151	0.999945	Not Sig	nonsignificant	.	.	Ras homolog, mTORC1 binding [Source:RGD Symbol;Acc:621840]
Tceal8	chrX	4160	1497	125.646	95.8885	29.7579	1.31034	1.89966e-44	1.89966e-44	FDR<0.05	0.375264	small	637.661	422.754	852.568	0.25163	4.01491	2.0167	5.94686e-05	0.01608	FDR<0.05	upregulated	.	.	transcription elongation factor A like 8 [Source:RGD Symbol;Acc:1359631]
Phyhip	chr15	8422	5503	98.7869	117.619	-18.8318	0.839891	1.17336e-42	1.17336e-42	FDR<0.05	-0.223915	small	1433.98	1408.51	1459.46	0.209447	0.240607	1.03618	0.80986	0.999945	Not Sig	nonsignificant	.	.	phytanoyl-CoA 2-hydroxylase interacting protein [Source:RGD Symbol;Acc:1305790]
Eif5a	chr10	9981	4144	95.6916	81.5273	14.1642	1.17374	3.61285e-42	3.61285e-42	FDR<0.05	0.261467	small	1543.2	1223.24	1863.17	0.258951	2.35042	1.52314	0.0187525	0.999945	Not Sig	nonsignificant	.	.	eukaryotic translation initiation factor 5A [Source:RGD Symbol;Acc:1308029]
Ncdn	chr5	7643	3931	148.698	167.146	-18.4472	0.889634	9.31018e-42	9.31018e-42	FDR<0.05	-0.240224	small	376.042	312.957	439.128	0.258026	1.9171	1.40316	0.0552256	0.999945	Not Sig	nonsignificant	.	.	neurochondrin [Source:RGD Symbol;Acc:621734]
Rbbp7	chrX	5202	2057	131.366	103.693	27.6728	1.26687	3.20812e-41	3.20812e-41	FDR<0.05	0.344676	small	862.353	629.583	1095.12	0.276123	2.89719	1.73944	0.00376525	0.503201	Not Sig	nonsignificant	.	.	RB binding protein 7, chromatin remodeling factor [Source:RGD Symbol;Acc:620125]
Hpca	chr5	60416	39395	99.5906	105.746	-6.15562	0.941789	3.34134e-40	3.34134e-40	FDR<0.05	-0.0819313	negligible	11488.1	11188.6	11787.6	0.209007	0.358943	1.05353	0.719638	0.999945	Not Sig	nonsignificant	.	.	hippocalcin [Source:RGD Symbol;Acc:620060]
Hsp90b1	chr7	5379	2634	109.935	88.7578	21.177	1.23859	9.34551e-40	9.34551e-40	FDR<0.05	0.327097	small	997.294	838.754	1155.83	0.236322	1.94987	1.37804	0.0511915	0.999945	Not Sig	nonsignificant	.	.	heat shock protein 90 beta family member 1 [Source:RGD Symbol;Acc:1310482]
Sh3bgrl3	chr5	10444	6632	93.8798	107.316	-13.4363	0.874797	2.41963e-39	2.41963e-39	FDR<0.05	-0.206168	small	2007.51	1947.88	2067.13	0.204176	0.418405	1.06122	0.675651	0.999945	Not Sig	nonsignificant	.	.	SH3 domain binding glutamate-rich protein like 3 [Source:RGD Symbol;Acc:1308118]
Tubb4b	chr3	14305	8913	98.3044	87.9868	10.3176	1.11726	5.15315e-39	5.15315e-39	FDR<0.05	0.195875	negligible	2794.27	2682.42	2906.12	0.234281	0.487693	1.08339	0.625768	0.999945	Not Sig	nonsignificant	.	.	tubulin, beta 4B class IVb [Source:RGD Symbol;Acc:735101]
Tsc22d1	chr15	15126	7566	117.708	106.07	11.6378	1.10972	1.39969e-33	1.39969e-33	FDR<0.05	0.15812	negligible	2604.34	2200.52	3008.15	0.206692	2.17805	1.36702	0.0294023	0.999945	Not Sig	nonsignificant	.	Y	TSC22 domain family, member 1 [Source:RGD Symbol;Acc:3850]
Dnajb5	chr5	2900	646	149.749	101.597	48.1523	1.47396	2.68796e-33	2.68796e-33	FDR<0.05	0.502059	medium	366.845	185.204	548.487	0.347507	4.51544	2.96153	6.31857e-06	0.00236987	FDR<0.05	upregulated	.	Y	DnaJ heat shock protein family (Hsp40) member B5 [Source:RGD Symbol;Acc:1307453]
Fth1	chr1	126048	41026	83.9996	81.0947	2.90491	1.03582	8.37978e-33	8.37978e-33	FDR<0.05	0.0932131	negligible	19883.8	14149.9	25617.6	0.816179	1.04929	1.81045	0.294046	0.999945	Not Sig	nonsignificant	.	.	ferritin heavy chain 1 [Source:RGD Symbol;Acc:2635]
Homer1	chr2	942	164	178.889	82.1279	96.7609	2.17817	3.36049e-32	3.36049e-32	FDR<0.05	1.01383	large	19.5655	17.0725	22.0586	0.697768	0.524396	1.29205	0.600003	0.999945	Not Sig	nonsignificant	Y	Y	homer scaffold protein 1 [Source:RGD Symbol;Acc:628725]
Zcchc12	chrX	10761	4654	136.97	122.019	14.9502	1.12252	6.82531e-32	6.82531e-32	FDR<0.05	0.189124	negligible	1706.51	1332.6	2080.41	0.214916	2.98324	1.56117	0.00285212	0.41452	Not Sig	nonsignificant	.	.	zinc finger CCHC-type containing 12 [Source:RGD Symbol;Acc:1359439]
Timm8b	chr8	14899	9726	79.4586	88.5112	-9.05256	0.897724	9.66302e-32	9.66302e-32	FDR<0.05	-0.153866	negligible	2914.02	2919.69	2908.35	0.200389	-0.02633	0.996114	0.978994	0.999945	Not Sig	nonsignificant	.	.	translocase of inner mitochondrial membrane 8 homolog B [Source:RGD Symbol;Acc:619840]
Srsf3	chr20	7263	3493	118.531	100.973	17.5585	1.17389	5.0174e-31	5.0174e-31	FDR<0.05	0.232043	small	372.111	341.868	402.354	0.246201	0.94893	1.17693	0.342656	0.999945	Not Sig	nonsignificant	.	Y	serine and arginine rich splicing factor 3 [Source:RGD Symbol;Acc:1309233]
Ly6e	chr7	11235	8068	85.4264	96.149	-10.7226	0.888479	5.20488e-31	5.20488e-31	FDR<0.05	-0.178287	negligible	2291.31	2343.31	2239.32	0.205814	-0.321503	0.955624	0.747829	0.999945	Not Sig	nonsignificant	.	.	lymphocyte antigen 6 family member E [Source:RGD Symbol;Acc:1565342]
Sumo2	chr10	18237	12548	83.8709	91.876	-8.00513	0.91287	3.55478e-29	3.55478e-29	FDR<0.05	-0.130673	negligible	3622.68	3648.85	3596.51	0.199579	-0.106002	0.985655	0.915581	0.999945	Not Sig	nonsignificant	.	Y	small ubiquitin-like modifier 2 [Source:RGD Symbol;Acc:621761]
Cox7c	chr2	46376	29408	82.0073	87.4177	-5.41038	0.938109	2.68396e-28	2.68396e-28	FDR<0.05	-0.080294	negligible	8157.59	7949.05	8366.14	0.198352	0.372925	1.05247	0.709204	0.999945	Not Sig	nonsignificant	.	.	cytochrome c oxidase subunit 7C [Source:RGD Symbol;Acc:2300145]
Rab3a	chr16	27222	17593	97.7726	105.725	-7.95266	0.92478	8.73631e-28	8.73631e-28	FDR<0.05	-0.105885	negligible	5384.61	5311.17	5458.06	0.19621	0.201392	1.02766	0.840392	0.999945	Not Sig	nonsignificant	.	Y	RAB3A, member RAS oncogene family [Source:RGD Symbol;Acc:3528]
Zwint	chr20	59274	41845	121.017	127.736	-6.7184	0.947404	1.16366e-27	1.16366e-27	FDR<0.05	-0.0666774	negligible	12026.9	12272.7	11781	0.209015	-0.283311	0.959933	0.776939	0.999945	Not Sig	nonsignificant	.	.	ZW10 interacting kinetochore protein [Source:RGD Symbol;Acc:628671]
Btbd8	chr14	1111	284	137.274	79.7295	57.5445	1.72175	2.94434e-27	2.94434e-27	FDR<0.05	0.71203	medium	93.9706	42.3673	145.574	0.444166	3.97636	3.436	6.99775e-05	0.0176876	FDR<0.05	upregulated	.	Y	BTB domain containing 8 [Source:RGD Symbol;Acc:2321418]
Egr3	chr15	4125	204	150.371	96.9703	53.4005	1.55069	3.70828e-26	3.70828e-26	FDR<0.05	0.679038	medium	70.5329	11.6255	129.44	1.08694	3.24348	11.1342	0.00118079	0.188069	Not Sig	nonsignificant	Y	Y	early growth response 3 [Source:RGD Symbol;Acc:2545]
Baiap2	chr10	3206	1166	132.933	105.416	27.5172	1.26103	9.69864e-25	9.69864e-25	FDR<0.05	0.333417	small	411.355	306.047	516.662	0.280041	2.69873	1.68818	0.00696038	0.793415	Not Sig	nonsignificant	.	.	BAR/IMD domain containing adaptor protein 2 [Source:RGD Symbol;Acc:619814]
Ndufb10	chr10	12581	8370	68.7284	75.9531	-7.2247	0.904879	2.33164e-24	2.33164e-24	FDR<0.05	-0.160231	negligible	2512.27	2489.83	2534.72	0.201135	0.126843	1.01803	0.899065	0.999945	Not Sig	nonsignificant	.	.	NADH:ubiquinone oxidoreductase subunit B10 [Source:RGD Symbol;Acc:1310782]
Tagln3	chr11	24414	15975	91.8784	99.9011	-8.02274	0.919693	2.59072e-24	2.59072e-24	FDR<0.05	-0.106266	negligible	4887.52	4854.63	4920.41	0.198046	0.0968372	1.01355	0.922856	0.999945	Not Sig	nonsignificant	.	.	transgelin 3 [Source:RGD Symbol;Acc:69301]
Rpl6	chr12	16370	10943	78.0167	85.8263	-7.80958	0.909007	1.53421e-23	1.53421e-23	FDR<0.05	-0.121481	negligible	426.549	427.493	425.606	0.242873	-0.0346623	0.995585	0.972349	0.999945	Not Sig	nonsignificant	.	.	ribosomal protein L6 [Source:RGD Symbol;Acc:619826]
Rpl22l1	chr2	13572	7196	88.3733	80.3009	8.07244	1.10053	5.59603e-23	5.59603e-23	FDR<0.05	0.142634	negligible	2166.65	1940.78	2392.53	0.212599	1.42201	1.23277	0.155023	0.999945	Not Sig	nonsignificant	.	.	ribosomal protein L22 like 1 [Source:RGD Symbol;Acc:1309517]
Pcdh8	chr15	3775	226	136.546	87.8732	48.6728	1.5539	7.89592e-23	7.89592e-23	FDR<0.05	0.630035	medium	289.653	50.9808	528.325	0.879266	3.84379	10.3632	0.000121148	0.0272464	FDR<0.05	upregulated	Y	.	protocadherin 8 [Source:RGD Symbol;Acc:69350]
Thy1	chr8	25002	18031	113.269	120.693	-7.42388	0.938489	2.62785e-22	2.62785e-22	FDR<0.05	-0.0916728	negligible	4766.97	4853.15	4680.79	0.220709	-0.239332	0.964486	0.810848	0.999945	Not Sig	nonsignificant	.	Y	Thy-1 cell surface antigen [Source:RGD Symbol;Acc:3860]
Rnasek	chr10	28230	18273	89.5756	95.3447	-5.76908	0.939492	2.95114e-22	2.95114e-22	FDR<0.05	-0.0939503	negligible	5233.66	5156.42	5310.9	0.196574	0.216986	1.02996	0.828219	0.999945	Not Sig	nonsignificant	.	.
Rps6	chr5	19331	12443	67.6017	73.4626	-5.86091	0.920219	3.03097e-22	3.03097e-22	FDR<0.05	-0.112213	negligible	3644.37	3549	3739.75	0.197372	0.38288	1.05375	0.701809	0.999945	Not Sig	nonsignificant	.	.	ribosomal protein S6 [Source:RGD Symbol;Acc:3602]
Timm13	chr7	9363	6614	98.1147	107.435	-9.32075	0.913243	3.45648e-22	3.45648e-22	FDR<0.05	-0.155242	negligible	1782.25	1823.98	1740.52	0.203805	-0.332895	0.954244	0.739213	0.999945	Not Sig	nonsignificant	.	.	translocase of inner mitochondrial membrane 13 [Source:RGD Symbol;Acc:628845]
LOC103693330	chr10	26092	15952	85.0845	91.0465	-5.96202	0.934517	3.88152e-22	3.88152e-22	FDR<0.05	-0.099289	negligible	693.854	708.507	679.2	0.228914	-0.271141	0.958635	0.786282	0.999945	Not Sig	nonsignificant	.	.
Rps8	chr5	27988	17856	63.8492	68.2293	-4.38011	0.935803	5.59364e-22	5.59364e-22	FDR<0.05	-0.092622	negligible	4322.05	4231.46	4412.63	0.201128	0.302337	1.04282	0.762396	0.999945	Not Sig	nonsignificant	.	.	ribosomal protein S8 [Source:RGD Symbol;Acc:61910]
Tceal9	chrX	6307	3246	100.957	87.2879	13.6691	1.1566	1.07801e-21	1.07801e-21	FDR<0.05	0.195113	negligible	1123.33	1002.77	1243.89	0.22094	1.40697	1.24045	0.159436	0.999945	Not Sig	nonsignificant	.	Y	transcription elongation factor A like 9 [Source:RGD Symbol;Acc:1592975]
Hmgcs1	chr2	3855	1813	132.826	113.475	19.3513	1.17053	1.50343e-21	1.50343e-21	FDR<0.05	0.26235	small	592.758	509.769	675.747	0.250776	1.6046	1.32559	0.108582	0.999945	Not Sig	nonsignificant	.	.	3-hydroxy-3-methylglutaryl-CoA synthase 1 [Source:RGD Symbol;Acc:70970]
LOC100911847	chr5	29032	18410	58.0451	62.3105	-4.26533	0.931547	3.37458e-21	3.37458e-21	FDR<0.05	-0.0889015	negligible	5692.83	5614.56	5771.09	0.198277	0.201074	1.02788	0.840641	0.999945	Not Sig	nonsignificant	.	.
Arpc5	chr13	4099	2052	116.813	98.2559	18.5566	1.18886	4.0372e-21	4.0372e-21	FDR<0.05	0.231964	small	679.119	583.95	774.289	0.241945	1.6692	1.32595	0.0950774	0.999945	Not Sig	nonsignificant	.	Y	actin related protein 2/3 complex, subunit 5 [Source:RGD Symbol;Acc:1311791]
Chn1	chr3	25285	16215	92.2948	100.277	-7.98238	0.920397	1.22652e-20	1.22652e-20	FDR<0.05	-0.086667	negligible	4815.44	4685.7	4945.19	0.200209	0.386748	1.05538	0.698943	0.999945	Not Sig	nonsignificant	.	.	chimerin 1 [Source:RGD Symbol;Acc:620139]
Atp5me	chr14	24835	16176	74.4379	79.211	-4.77311	0.939742	5.78209e-20	5.78209e-20	FDR<0.05	-0.0968295	negligible	1924.22	1832.39	2016.04	0.216474	0.642013	1.10022	0.520865	0.999945	Not Sig	nonsignificant	.	.	ATP synthase membrane subunit e [Source:RGD Symbol;Acc:621377]
LOC100359574	chr1	6792	3183	104.224	92.054	12.1704	1.13221	6.35728e-20	6.35728e-20	FDR<0.05	0.188872	negligible	26.6322	20.4502	32.8143	0.627301	1.09854	1.60459	0.27197	0.999945	Not Sig	nonsignificant	.	Y	NHP2 non-histone chromosome protein 2-like 1-like [Source:RGD Symbol;Acc:2323620]
Atp6v0e2	chr4	12280	8605	111.41	120.18	-8.7699	0.927027	8.72903e-20	8.72903e-20	FDR<0.05	-0.119418	negligible	105.877	99.8689	111.884	0.353239	0.447829	1.12031	0.654277	0.999945	Not Sig	nonsignificant	.	.	ATPase, H+ transporting V0 subunit e2 [Source:RGD Symbol;Acc:1303238]
Rps21	chr3	39544	23680	61.542	65.1953	-3.65335	0.943963	9.21402e-20	9.21402e-20	FDR<0.05	-0.0729825	negligible	2813.46	2644.76	2982.16	0.238298	0.731864	1.12758	0.464252	0.999945	Not Sig	nonsignificant	.	.	ribosomal protein S21 [Source:RGD Symbol;Acc:621038]
Rpl4	chr8	19874	12282	76.4539	82.1978	-5.74389	0.930121	1.54112e-19	1.54112e-19	FDR<0.05	-0.0964875	negligible	3891.34	3723.93	4058.75	0.197925	0.628125	1.08991	0.529922	0.999945	Not Sig	nonsignificant	.	.	ribosomal protein L4 [Source:RGD Symbol;Acc:619824]
Peli1	chr14	1611	198	136.403	83.1523	53.2506	1.6404	2.57768e-19	2.57768e-19	FDR<0.05	0.648466	medium	142.675	32.9148	252.436	0.882322	3.32047	7.66937	0.000898665	0.151554	Not Sig	nonsignificant	Y	.	pellino E3 ubiquitin protein ligase 1 [Source:RGD Symbol;Acc:1311199]
Uqcr10	chr14	18628	12157	90.7321	97.1536	-6.42153	0.933903	6.41133e-19	6.41133e-19	FDR<0.05	-0.105674	negligible	3518.57	3492.83	3544.3	0.197203	0.107073	1.01474	0.914731	0.999945	Not Sig	nonsignificant	.	.	ubiquinol-cytochrome c reductase, complex III subunit X [Source:RGD Symbol;Acc:1595126]
Naa38	chr10	7415	4808	82.1352	90.9877	-8.85247	0.902707	6.7974e-19	6.7974e-19	FDR<0.05	-0.172851	negligible	471.565	444.798	498.333	0.242758	0.685679	1.12036	0.492916	0.999945	Not Sig	nonsignificant	.	.	N(alpha)-acetyltransferase 38, NatC auxiliary subunit [Source:RGD Symbol;Acc:1559617]
Psmb5	chr15	11136	7782	72.9689	80.2502	-7.2813	0.909268	8.66109e-19	8.66109e-19	FDR<0.05	-0.133881	negligible	2249.89	2303.34	2196.43	0.202865	-0.340259	0.953581	0.733662	0.999945	Not Sig	nonsignificant	.	.	proteasome 20S subunit beta 5 [Source:RGD Symbol;Acc:61879]
Emd	chrX	2096	592	137.932	108.861	29.0704	1.26704	2.32983e-18	2.32983e-18	FDR<0.05	0.384623	small	301.136	172.348	429.924	0.33328	3.95423	2.49451	7.67817e-05	0.0189945	FDR<0.05	upregulated	.	.	emerin [Source:RGD Symbol;Acc:2551]
LOC100365810	chr8	17525	10641	64.4618	69.5083	-5.0465	0.927397	5.74275e-18	5.74275e-18	FDR<0.05	-0.113305	negligible	507.56	460.746	554.374	0.233978	1.1429	1.20321	0.253079	0.999945	Not Sig	nonsignificant	.	.	40S ribosomal protein S17-like [Source:RGD Symbol;Acc:2318277]
Tspan7	chrX	28957	18151	102.191	109.253	-7.06222	0.935359	8.24064e-18	8.24064e-18	FDR<0.05	-0.0798023	negligible	5575.05	5364.35	5785.75	0.197484	0.551453	1.07856	0.581323	0.999945	Not Sig	nonsignificant	Y	.	tetraspanin 7 [Source:RGD Symbol;Acc:1589725]
Pkm	chr8	24683	17377	101.586	108.197	-6.6105	0.938903	9.56966e-18	9.56966e-18	FDR<0.05	-0.0852948	negligible	4368.44	4446.07	4290.81	0.219887	-0.236255	0.965078	0.813235	0.999945	Not Sig	nonsignificant	.	.	pyruvate kinase M1/2 [Source:RGD Symbol;Acc:3337]
Cox14	chr7	6714	4594	97.5967	108.266	-10.6696	0.90145	9.88057e-18	9.88057e-18	FDR<0.05	-0.157131	negligible	928.867	939.349	918.385	0.214867	-0.148724	0.977683	0.881772	0.999945	Not Sig	nonsignificant	.	.
Tmem258	chr1	4964	3219	95.3124	109.241	-13.9282	0.872499	1.28305e-17	1.28305e-17	FDR<0.05	-0.200632	small	302.826	262.999	342.652	0.256936	1.48624	1.30286	0.137217	0.999945	Not Sig	nonsignificant	.	Y
Tubb3	chr19	11485	7594	95.9057	89.0629	6.84284	1.07683	1.37962e-17	1.37962e-17	FDR<0.05	0.13302	negligible	2085.69	2063.56	2107.81	0.226394	0.128659	1.02145	0.897628	0.999945	Not Sig	nonsignificant	.	.	tubulin, beta 3 class III [Source:RGD Symbol;Acc:628595]
Caly	chr1	15945	10460	85.0859	92.3347	-7.24884	0.921494	1.38017e-17	1.38017e-17	FDR<0.05	-0.106814	negligible	3122.57	3146.81	3098.32	0.207834	-0.105346	0.98459	0.916101	0.999945	Not Sig	nonsignificant	.	.	calcyon neuron-specific vesicular protein [Source:RGD Symbol;Acc:621719]
Snap25	chr3	39719	27789	120.342	126.755	-6.41312	0.949406	1.43957e-17	1.43957e-17	FDR<0.05	-0.0639206	negligible	7709.4	7828.08	7590.73	0.206936	-0.216173	0.969679	0.828853	0.999945	Not Sig	nonsignificant	.	Y	synaptosome associated protein 25 [Source:RGD Symbol;Acc:3728]
Atp6v1g2	chr20	10162	6217	113.128	125.943	-12.8156	0.898243	1.60399e-17	1.60399e-17	FDR<0.05	-0.131251	negligible	1875.23	1797.52	1952.94	0.205189	0.585408	1.08646	0.558273	0.999945	Not Sig	nonsignificant	.	.	ATPase H+ transporting V1 subunit G2 [Source:RGD Symbol;Acc:1303186]
Rpl36a	chrX	13389	8428	60.9915	66.3655	-5.37397	0.919025	1.83035e-17	1.83035e-17	FDR<0.05	-0.12592	negligible	175.488	152.997	197.979	0.301154	1.23942	1.294	0.215189	0.999945	Not Sig	nonsignificant	.	.	ribosomal protein L36A [Source:RGD Symbol;Acc:1306640]
Hsbp1	chr19	15300	10484	105.377	113.587	-8.2102	0.927719	2.65545e-17	2.65545e-17	FDR<0.05	-0.106887	negligible	2882	2900.21	2863.8	0.208153	-0.0910193	0.987445	0.927477	0.999945	Not Sig	nonsignificant	.	.	heat shock factor binding protein 1 [Source:RGD Symbol;Acc:628632]
LOC100362830	chr5	36591	22517	57.664	60.9696	-3.30562	0.945783	3.36879e-17	3.36879e-17	FDR<0.05	-0.0947486	negligible	7161.97	6995.23	7328.71	0.198372	0.339467	1.04767	0.734258	0.999945	Not Sig	nonsignificant	.	.
Rps4x	chrX	17387	11187	67.4276	73.0104	-5.58283	0.923534	3.76471e-17	3.76471e-17	FDR<0.05	-0.105952	negligible	145.829	140.585	151.073	0.312618	0.340154	1.0746	0.733741	0.999945	Not Sig	nonsignificant	.	.	ribosomal protein S4, X-linked [Source:RGD Symbol;Acc:2324318]
CYTB	chrM	221626	150483	57.8965	58.5375	-0.640937	0.989051	4.5749e-17	4.5749e-17	FDR<0.05	-0.0230804	negligible	35235.2	36168.4	34302.1	0.196311	-0.389263	0.948401	0.697081	0.999945	Not Sig	nonsignificant	.	.	mitochondrially encoded cytochrome b [Source:RGD Symbol;Acc:620081]
Synpo	chr18	1440	580	106.85	79.8559	26.9945	1.33804	4.62197e-17	4.62197e-17	FDR<0.05	0.399613	small	134.259	99.7907	168.728	0.373306	2.01566	1.69082	0.0438357	0.999945	Not Sig	nonsignificant	.	.	synaptopodin [Source:RGD Symbol;Acc:620668]
Ndrg4	chr19	18425	12711	120.591	130.333	-9.74223	0.925251	5.41167e-17	5.41167e-17	FDR<0.05	-0.100334	negligible	3547.81	3544.35	3551.27	0.230148	0.00838384	1.00195	0.993311	0.999945	Not Sig	nonsignificant	.	Y	NDRG family member 4 [Source:RGD Symbol;Acc:621593]
Rpl18a	chr16	20512	12908	71.1616	76.1	-4.93843	0.935106	6.1287e-17	6.1287e-17	FDR<0.05	-0.0873539	negligible	3692.25	3626.15	3758.35	0.202291	0.257415	1.03646	0.796858	0.999945	Not Sig	nonsignificant	.	.	ribosomal protein L18A [Source:RGD Symbol;Acc:1302976]
Spcs1	chr16	6322	4238	84.8996	95.5043	-10.6047	0.888961	6.54231e-17	6.54231e-17	FDR<0.05	-0.165814	negligible	1207.8	1205.21	1210.39	0.212263	0.0267248	1.0043	0.978679	0.999945	Not Sig	nonsignificant	.	.	signal peptidase complex subunit 1 [Source:RGD Symbol;Acc:1309125]
LOC100362027	chr10	20122	12361	60.0992	64.5908	-4.49161	0.930461	8.4473e-17	8.4473e-17	FDR<0.05	-0.104927	negligible	3587.91	3486.3	3689.51	0.203103	0.404296	1.05829	0.685995	0.999945	Not Sig	nonsignificant	.	.
Pop7	chr12	1426	1214	79.4008	102.74	-23.3394	0.772831	1.02485e-16	1.02485e-16	FDR<0.05	-0.313036	small	317.489	342.445	292.532	0.275182	-0.839816	0.854244	0.401011	0.999945	Not Sig	nonsignificant	.	.	POP7 homolog, ribonuclease P/MRP subunit [Source:RGD Symbol;Acc:1306413]
Ndufa4	chr4	50921	32541	104.472	108.336	-3.86355	0.964337	1.49565e-16	1.49565e-16	FDR<0.05	-0.0609756	negligible	2290.38	2245.92	2334.84	0.205198	0.273401	1.03959	0.784545	0.999945	Not Sig	nonsignificant	.	.	Ndufa4, mitochondrial complex associated [Source:RGD Symbol;Acc:1584719]
Cox6b1	chr1	33014	22166	89.6975	93.9701	-4.27258	0.954533	1.65737e-16	1.65737e-16	FDR<0.05	-0.0730325	negligible	624.753	597.563	651.944	0.227954	0.547929	1.09101	0.583741	0.999945	Not Sig	nonsignificant	.	.	cytochrome c oxidase subunit 6B1 [Source:RGD Symbol;Acc:1584097]
Pam16	chr10	4877	3444	87.4067	98.9473	-11.5406	0.883366	1.88577e-16	1.88577e-16	FDR<0.05	-0.179094	negligible	821.703	823.612	819.794	0.218345	-0.0271201	0.995364	0.978364	0.999945	Not Sig	nonsignificant	.	.	presequence translocase associated motor 16 [Source:RGD Symbol;Acc:1598163]
Rpl34	chr2	18776	11748	57.3269	61.675	-4.34814	0.929499	2.42968e-16	2.42968e-16	FDR<0.05	-0.102627	negligible	1113.24	1052.23	1174.25	0.215366	0.739641	1.11597	0.459518	0.999945	Not Sig	nonsignificant	.	.	ribosomal protein L34 [Source:RGD Symbol;Acc:1309402]
Rpl28	chr1	24081	15352	68.1446	72.3679	-4.22332	0.941641	3.18208e-16	3.18208e-16	FDR<0.05	-0.0837491	negligible	171.659	166.352	176.967	0.309081	0.290096	1.06381	0.771742	0.999945	Not Sig	nonsignificant	.	Y	ribosomal protein L28 [Source:RGD Symbol;Acc:621193]
Naca	chr7	14896	9994	75.1914	82.0192	-6.82782	0.916753	3.71353e-16	3.71353e-16	FDR<0.05	-0.111166	negligible	2924.84	2919.79	2929.9	0.200836	0.0229884	1.00346	0.98166	0.999945	Not Sig	nonsignificant	.	.	nascent polypeptide associated complex subunit alpha [Source:RGD Symbol;Acc:1308642]
Rgs10	chr1	8870	3744	86.4452	97.1258	-10.6806	0.890033	4.17352e-16	4.17352e-16	FDR<0.05	-0.154211	negligible	1440.71	1165.07	1716.34	0.2682	2.09361	1.47316	0.0362945	0.999945	Not Sig	nonsignificant	Y	.	regulator of G-protein signaling 10 [Source:RGD Symbol;Acc:3562]
Rpl23	chr10	23043	14122	66.8314	71.5097	-4.67835	0.934577	5.22655e-16	5.22655e-16	FDR<0.05	-0.0773526	negligible	4077.32	3941.73	4212.91	0.200538	0.480414	1.0688	0.630933	0.999945	Not Sig	nonsignificant	.	.	ribosomal protein L23 [Source:RGD Symbol;Acc:62067]
Ywhae	chr10	26656	17299	91.6003	97.8558	-6.2555	0.936074	5.71234e-16	5.71234e-16	FDR<0.05	-0.075898	negligible	5083.98	4949.62	5218.34	0.205506	0.368945	1.05429	0.712169	0.999945	Not Sig	nonsignificant	.	.	tyrosine 3-monooxygenase/tryptophan 5-monooxygenase activation protein, epsilon [Source:RGD Symbol;Acc:62000]
Psma7	chr3	8866	5584	83.5839	92.3033	-8.71941	0.905535	5.83301e-16	5.83301e-16	FDR<0.05	-0.147441	negligible	1667.38	1605.59	1729.16	0.205158	0.521021	1.07696	0.602352	0.999945	Not Sig	nonsignificant	.	.	proteasome 20S subunit alpha 7 [Source:RGD Symbol;Acc:61851]
Uqcrb	chr7	15640	10161	80.4191	86.9312	-6.51217	0.925088	8.49629e-16	8.49629e-16	FDR<0.05	-0.100388	negligible	142.52	142.68	142.359	0.31491	-0.000577017	0.997751	0.99954	0.999945	Not Sig	nonsignificant	.	.	ubiquinol-cytochrome c reductase binding protein [Source:RGD Symbol;Acc:1311971]
RGD1560523	chr13	4532	711	220.325	174.82	45.5052	1.2603	8.83593e-16	8.83593e-16	FDR<0.05	0.264864	small	5.94863	3.98013	7.91714	1.23963	0.779826	1.98917	0.435493	0.999945	Not Sig	nonsignificant	.	.	similar to S-adenosylmethionine synthetase gamma form (Methionine adenosyltransferase) [Source:RGD Symbol;Acc:1560523]
Gstm7	chr2	10686	6433	90.256	99.5176	-9.26155	0.906936	1.25516e-15	1.25516e-15	FDR<0.05	-0.124798	negligible	1984.87	1885.79	2083.95	0.205096	0.705798	1.10508	0.480314	0.999945	Not Sig	nonsignificant	.	.	glutathione S-transferase, mu 7 [Source:RGD Symbol;Acc:621287]
Nefm	chr15	2871	930	115.528	96.2038	19.3243	1.20087	1.25967e-15	1.25967e-15	FDR<0.05	0.292274	small	314.315	176.717	451.912	0.745543	1.82087	2.55726	0.0686261	0.999945	Not Sig	nonsignificant	.	.	neurofilament medium chain [Source:RGD Symbol;Acc:3160]
Cox7a2l	chr6	9333	6584	91.5699	99.5545	-7.98466	0.919796	1.49428e-15	1.49428e-15	FDR<0.05	-0.120141	negligible	1791.62	1822.34	1760.91	0.213023	-0.237659	0.966291	0.812146	0.999945	Not Sig	nonsignificant	.	.	cytochrome c oxidase subunit 7A2 like [Source:RGD Symbol;Acc:1306111]
Mphosph6	chr19	2316	1701	75.2601	92.5042	-17.2441	0.813586	1.53466e-15	1.53466e-15	FDR<0.05	-0.265737	small	509.836	545.267	474.405	0.23796	-0.832055	0.870041	0.405378	0.999945	Not Sig	nonsignificant	.	.	M phase phosphoprotein 6 [Source:RGD Symbol;Acc:1591222]
Sparcl1	chr14	30477	20500	115.772	122.349	-6.57685	0.946245	1.61159e-15	1.61159e-15	FDR<0.05	-0.0723038	negligible	6411.54	6369.01	6454.08	0.216574	0.086467	1.01336	0.931095	0.999945	Not Sig	nonsignificant	Y	.	SPARC like 1 [Source:RGD Symbol;Acc:2531]
LOC680121	chr11	6400	3221	87.8717	78.4442	9.42752	1.12018	2.739e-15	2.739e-15	FDR<0.05	0.16716	negligible	1222.95	1056.96	1388.93	0.258862	1.5088	1.31407	0.13135	0.999945	Not Sig	nonsignificant	.	.	similar to heat shock protein 8 [Source:RGD Symbol;Acc:1595502]
Polr2g	chr1	4018	2781	93.0105	107.442	-14.4315	0.865681	4.01854e-15	4.01854e-15	FDR<0.05	-0.199971	negligible	822.283	836	808.565	0.217842	-0.223638	0.967183	0.823039	0.999945	Not Sig	nonsignificant	.	.	RNA polymerase II subunit G [Source:RGD Symbol;Acc:621284]
Rpl24	chr11	19940	12635	66.3739	70.9708	-4.5969	0.935228	4.42158e-15	4.42158e-15	FDR<0.05	-0.0900982	negligible	3563.81	3481.27	3646.35	0.206358	0.326164	1.04742	0.7443	0.999945	Not Sig	nonsignificant	.	.	ribosomal protein L24 [Source:RGD Symbol;Acc:621191]
Park7	chr5	12529	8167	91.8041	98.7387	-6.93463	0.929768	4.73521e-15	4.73521e-15	FDR<0.05	-0.110437	negligible	2422.01	2392.48	2451.55	0.20249	0.172466	1.02469	0.863072	0.999945	Not Sig	nonsignificant	.	.	Parkinsonism associated deglycase [Source:RGD Symbol;Acc:621808]
Rpl17	chr18	18071	11842	62.0357	66.4287	-4.39292	0.93387	4.90797e-15	4.90797e-15	FDR<0.05	-0.0917879	negligible	2240.33	2180.19	2300.48	0.206165	0.378406	1.05518	0.705129	0.999945	Not Sig	nonsignificant	.	.	ribosomal protein L17 [Source:RGD Symbol;Acc:1303019]
Ldha	chr1	18652	11615	116.31	111.182	5.12817	1.04612	4.93528e-15	4.93528e-15	FDR<0.05	0.102647	negligible	3551.28	3415.79	3686.78	0.212471	0.515503	1.07933	0.606202	0.999945	Not Sig	nonsignificant	.	.	lactate dehydrogenase A [Source:RGD Symbol;Acc:2996]
Lamtor5	chr2	3635	2516	102.616	117.873	-15.2577	0.870559	5.72807e-15	5.72807e-15	FDR<0.05	-0.195317	negligible	693.516	684.601	702.431	0.223517	0.160343	1.02604	0.872611	0.999945	Not Sig	nonsignificant	.	.	late endosomal/lysosomal adaptor, MAPK and MTOR activator 5 [Source:RGD Symbol;Acc:1305005]
Atp5mf	chr12	15768	10378	77.0918	82.0847	-4.99292	0.939174	5.74478e-15	5.74478e-15	FDR<0.05	-0.105753	negligible	2714.69	2649.54	2779.84	0.204337	0.341578	1.04918	0.732669	0.999945	Not Sig	nonsignificant	.	.	ATP synthase membrane subunit f [Source:RGD Symbol;Acc:1596067]
Tmem59l	chr16	10006	5254	90.5341	100.232	-9.69797	0.903245	5.8403e-15	5.8403e-15	FDR<0.05	-0.134137	negligible	1791.66	1611.6	1971.72	0.240292	1.21903	1.22346	0.222831	0.999945	Not Sig	nonsignificant	.	.	transmembrane protein 59-like [Source:RGD Symbol;Acc:1305557]
Rpl8	chr7	11808	7359	66.8691	72.8338	-5.96475	0.918105	5.91288e-15	5.91288e-15	FDR<0.05	-0.117947	negligible	106.845	104.346	109.345	0.348932	0.199802	1.04791	0.841636	0.999945	Not Sig	nonsignificant	.	.	ribosomal protein L8 [Source:RGD Symbol;Acc:619827]
Rraga	chr5	4898	2616	121.967	107.887	14.0799	1.13051	6.34546e-15	6.34546e-15	FDR<0.05	0.182801	negligible	854.919	758.391	951.447	0.220145	1.47856	1.25456	0.139257	0.999945	Not Sig	nonsignificant	Y	.	Ras-related GTP binding A [Source:RGD Symbol;Acc:619804]
Rpl29	chr8	17740	11079	78.5904	83.9201	-5.32968	0.936491	6.55592e-15	6.55592e-15	FDR<0.05	-0.103901	negligible	2616.12	2501.31	2730.94	0.21161	0.602867	1.09181	0.546597	0.999945	Not Sig	nonsignificant	.	.	ribosomal protein L29 [Source:RGD Symbol;Acc:62069]
Nptx1	chr10	2672	1169	125.774	106.588	19.1861	1.18	1.5264e-14	1.5264e-14	FDR<0.05	0.263226	small	33.7727	28.3576	39.1878	0.567976	0.863601	1.38191	0.387807	0.999945	Not Sig	nonsignificant	.	Y	neuronal pentraxin 1 [Source:RGD Symbol;Acc:628894]
Ube2d3	chr2	3267	1272	121.704	104.648	17.0567	1.16299	1.64746e-14	1.64746e-14	FDR<0.05	0.239215	small	375.787	249.226	502.348	0.298648	3.38765	2.01563	0.000704951	0.124189	Not Sig	nonsignificant	.	Y	ubiquitin-conjugating enzyme E2D 3 [Source:RGD Symbol;Acc:619912]
RGD1311703	chr1	6050	3947	87.8423	99.0396	-11.1973	0.886941	1.80311e-14	1.80311e-14	FDR<0.05	-0.14689	negligible	1163.14	1157.14	1169.14	0.221357	0.0599202	1.01037	0.952219	0.999945	Not Sig	nonsignificant	.	Y
Grcc10	chr4	9837	6567	82.9142	89.6436	-6.72939	0.924932	1.89916e-14	1.89916e-14	FDR<0.05	-0.124164	negligible	844.77	815.916	873.624	0.218679	0.450997	1.07073	0.651992	0.999945	Not Sig	nonsignificant	.	.
Cxcl12	chr4	5190	2913	96.6764	111.074	-14.3981	0.870374	2.04996e-14	2.04996e-14	FDR<0.05	-0.173801	negligible	921.126	837.225	1005.03	0.223614	1.18893	1.20043	0.234467	0.999945	Not Sig	nonsignificant	.	.	C-X-C motif chemokine ligand 12 [Source:RGD Symbol;Acc:3651]
Elob	chr10	17613	11257	77.8667	83.1947	-5.32802	0.935957	2.22616e-14	2.22616e-14	FDR<0.05	-0.0936453	negligible	3092.05	3031.42	3152.69	0.203541	0.280311	1.04	0.779239	0.999945	Not Sig	nonsignificant	.	.	elongin B [Source:RGD Symbol;Acc:621200]
LOC100360508	chr13	22320	13534	62.3081	66.4263	-4.11818	0.938004	2.64671e-14	2.64671e-14	FDR<0.05	-0.0823735	negligible	4639.77	4514.82	4764.72	0.20506	0.381314	1.05535	0.70297	0.999945	Not Sig	nonsignificant	.	.
Ndufa3	chr1	15723	9663	76.654	82.1071	-5.45304	0.933586	2.8943e-14	2.8943e-14	FDR<0.05	-0.100389	negligible	1066.78	972.205	1161.35	0.226299	1.14406	1.19456	0.252599	0.999945	Not Sig	nonsignificant	.	.	NADH:ubiquinone oxidoreductase subunit A3 [Source:RGD Symbol;Acc:1588687]
Snurf	chr1	35068	24354	89.613	95.1414	-5.52839	0.941893	3.49768e-14	3.49768e-14	FDR<0.05	-0.0529355	negligible	91.5282	94.946	88.1103	0.38481	-0.281393	0.928004	0.778409	0.999945	Not Sig	nonsignificant	.	.
Rpl12	chr3	14660	9284	69.8017	75.0494	-5.24775	0.930076	3.50257e-14	3.50257e-14	FDR<0.05	-0.104997	negligible	1785	1705.29	1864.7	0.241556	0.54	1.09348	0.589197	0.999945	Not Sig	nonsignificant	.	.	ribosomal protein L12 [Source:RGD Symbol;Acc:1565106]
Atf4	chr7	8536	2538	150.457	135.311	15.1466	1.11194	3.63421e-14	3.63421e-14	FDR<0.05	0.158927	negligible	1218.58	749.336	1687.83	0.249181	4.68942	2.25244	2.73981e-06	0.00113771	FDR<0.05	upregulated	.	Y	activating transcription factor 4 [Source:RGD Symbol;Acc:621863]
Gla	chrX	794	260	151.557	108.704	42.8525	1.39421	4.62663e-14	4.62663e-14	FDR<0.05	0.524702	medium	102.298	68.6303	135.965	0.461623	2.13807	1.98112	0.0325109	0.999945	Not Sig	nonsignificant	.	.	galactosidase, alpha [Source:RGD Symbol;Acc:1589721]
Rps15al4	chr2	26059	15930	63.6799	67.4141	-3.73425	0.944607	4.74147e-14	4.74147e-14	FDR<0.05	-0.0883112	negligible	3799.17	3672.07	3926.27	0.21577	0.450577	1.06922	0.652294	0.999945	Not Sig	nonsignificant	.	.	ribosomal protein S15A-like 4 [Source:RGD Symbol;Acc:2319559]
Hsp90aa1	chr6	12651	8092	110.512	105.046	5.46561	1.05203	8.07067e-14	8.07067e-14	FDR<0.05	0.114363	negligible	2584.93	2472.87	2696.99	0.241993	0.511054	1.09063	0.609313	0.999945	Not Sig	nonsignificant	.	.	heat shock protein 90 alpha family class A member 1 [Source:RGD Symbol;Acc:631409]
Rtn4	chr14	11521	7220	106.532	116.248	-9.7153	0.916426	9.27226e-14	9.27226e-14	FDR<0.05	-0.110081	negligible	2329.03	2259.04	2399.01	0.203398	0.423949	1.06196	0.671603	0.999945	Not Sig	nonsignificant	.	.	reticulon 4 [Source:RGD Symbol;Acc:620989]
Rps5	chr1	9021	5980	61.9051	67.3999	-5.49483	0.918474	1.29566e-13	1.29566e-13	FDR<0.05	-0.105807	negligible	1780.47	1780.02	1780.93	0.205928	0.00056856	1.00051	0.999546	0.999945	Not Sig	nonsignificant	.	.	ribosomal protein S5 [Source:RGD Symbol;Acc:3601]
Rpl11	chr5	15477	9952	68.736	73.3757	-4.6397	0.936768	1.43833e-13	1.43833e-13	FDR<0.05	-0.104893	negligible	2768.86	2747.11	2790.62	0.203372	0.113412	1.01584	0.909704	0.999945	Not Sig	nonsignificant	.	.	ribosomal protein L11 [Source:RGD Symbol;Acc:1308681]
LOC685085	chr4	18557	11303	59.8417	64.0366	-4.19489	0.934492	1.55074e-13	1.55074e-13	FDR<0.05	-0.0972472	negligible	2214.72	2225.17	2204.27	0.203933	-0.0640525	0.990609	0.948928	0.999945	Not Sig	nonsignificant	.	.	similar to 40S ribosomal protein S25 [Source:RGD Symbol;Acc:1583218]
P4hb	chr10	1207	386	116.124	88.4583	27.6658	1.31276	1.5969e-13	1.5969e-13	FDR<0.05	0.433262	small	169.347	105.654	233.039	0.416541	2.76353	2.20568	0.00571792	0.704772	Not Sig	nonsignificant	.	Y	prolyl 4-hydroxylase subunit beta [Source:RGD Symbol;Acc:3244]
Ckmt1	chr3	8770	6106	95.5568	103.877	-8.32035	0.919902	1.74105e-13	1.74105e-13	FDR<0.05	-0.119815	negligible	1733.05	1744.88	1721.22	0.213635	-0.0978039	0.986441	0.922088	0.999945	Not Sig	nonsignificant	.	.	creatine kinase, mitochondrial 1 [Source:RGD Symbol;Acc:61976]
Tmx2	chr3	3813	2815	87.384	100.237	-12.8531	0.871773	1.94059e-13	1.94059e-13	FDR<0.05	-0.168679	negligible	623.42	617.837	629.004	0.285986	0.0740548	1.01807	0.940967	0.999945	Not Sig	nonsignificant	.	.	thioredoxin-related transmembrane protein 2 [Source:RGD Symbol;Acc:1359456]
Cplx2	chr17	6267	3517	89.9362	100.721	-10.7843	0.892929	1.97767e-13	1.97767e-13	FDR<0.05	-0.152141	negligible	206.98	173.183	240.778	0.320829	1.51962	1.39031	0.128605	0.999945	Not Sig	nonsignificant	.	Y	complexin 2 [Source:RGD Symbol;Acc:70945]
Rab11b	chr7	8091	5685	93.9863	103.545	-9.55828	0.907689	2.371e-13	2.371e-13	FDR<0.05	-0.11403	negligible	1542.62	1577.51	1507.74	0.212721	-0.312378	0.955771	0.754753	0.999945	Not Sig	nonsignificant	.	Y	RAB11B, member RAS oncogene family [Source:RGD Symbol;Acc:68369]
Eif4a1	chr10	6291	2218	117.745	104.975	12.7699	1.12165	2.45022e-13	2.45022e-13	FDR<0.05	0.168611	negligible	927.9	639.56	1216.24	0.251895	3.68599	1.90168	0.000227814	0.0448948	FDR<0.05	nonsignificant	.	Y	eukaryotic translation initiation factor 4A1 [Source:RGD Symbol;Acc:735141]
Rps11	chr1	23883	15298	59.7583	63.433	-3.67467	0.94207	4.42525e-13	4.42525e-13	FDR<0.05	-0.0819317	negligible	4221.71	4182.18	4261.24	0.200791	0.136151	1.0189	0.891702	0.999945	Not Sig	nonsignificant	.	.	ribosomal protein S11 [Source:RGD Symbol;Acc:621026]
Stmn3	chr3	30989	22545	99.7035	104.424	-4.72025	0.954797	4.50287e-13	4.50287e-13	FDR<0.05	-0.0632898	negligible	6550.37	6846.71	6254.04	0.200968	-0.651308	0.913437	0.514848	0.999945	Not Sig	nonsignificant	.	.	stathmin 3 [Source:RGD Symbol;Acc:3628]
Coa3	chr10	5487	3862	83.6886	93.4488	-9.76023	0.895555	4.67733e-13	4.67733e-13	FDR<0.05	-0.145897	negligible	1098.11	1124.87	1071.35	0.211341	-0.332948	0.952423	0.739173	0.999945	Not Sig	nonsignificant	.	.	cytochrome C oxidase assembly factor 3 [Source:RGD Symbol;Acc:1564337]
LOC100364457	chr1	31406	20206	60.7904	63.9992	-3.20885	0.949861	5.05191e-13	5.05191e-13	FDR<0.05	-0.0771332	negligible	6370.42	6329.67	6411.17	0.198817	0.0936703	1.01288	0.925371	0.999945	Not Sig	nonsignificant	.	.
Fau	chr1	30069	18360	68.9015	72.3675	-3.46598	0.952106	5.22467e-13	5.22467e-13	FDR<0.05	-0.0706057	negligible	5023.42	4810.32	5236.52	0.203148	0.604383	1.0886	0.545589	0.999945	Not Sig	nonsignificant	.	.	FAU ubiquitin like and ribosomal protein S30 fusion [Source:RGD Symbol;Acc:61938]
Snca	chr4	17460	12126	110.585	117.689	-7.10463	0.939632	5.38577e-13	5.38577e-13	FDR<0.05	-0.0832697	negligible	3686.95	3754.06	3619.83	0.201316	-0.262728	0.964244	0.79276	0.999945	Not Sig	nonsignificant	Y	Y	synuclein alpha [Source:RGD Symbol;Acc:3729]
Vdac3	chr16	8940	6150	84.8931	93.558	-8.66485	0.907385	5.50053e-13	5.50053e-13	FDR<0.05	-0.130607	negligible	1833.95	1860.64	1807.27	0.204995	-0.207088	0.971315	0.835941	0.999945	Not Sig	nonsignificant	.	.	voltage-dependent anion channel 3 [Source:RGD Symbol;Acc:621577]
Jpt1	chr10	13304	7044	99.7303	93.0747	6.65566	1.07151	5.94049e-13	5.94049e-13	FDR<0.05	0.112996	negligible	755.851	686.25	825.451	0.226732	1.17388	1.20284	0.240444	0.999945	Not Sig	nonsignificant	.	.
Atp6v0d1	chr19	12830	9111	98.7448	106.96	-8.21534	0.923193	6.09594e-13	6.09594e-13	FDR<0.05	-0.090401	negligible	2679.27	2738.49	2620.04	0.206835	-0.311831	0.956746	0.755169	0.999945	Not Sig	nonsignificant	.	.	ATPase H+ transporting V0 subunit D1 [Source:RGD Symbol;Acc:1306159]
Ubl5	chr8	13473	8095	90.4824	96.8832	-6.40075	0.933933	6.16131e-13	6.16131e-13	FDR<0.05	-0.0942754	negligible	2116.34	2011.03	2221.65	0.206519	0.699138	1.10473	0.484466	0.999945	Not Sig	nonsignificant	.	.	ubiquitin-like 5 [Source:RGD Symbol;Acc:1564644]
Dctn6	chr16	4555	3158	79.8004	90.7179	-10.9175	0.879655	6.19197e-13	6.19197e-13	FDR<0.05	-0.167153	negligible	916.705	934.248	899.163	0.21967	-0.257833	0.962445	0.796536	0.999945	Not Sig	nonsignificant	.	.	dynactin subunit 6 [Source:RGD Symbol;Acc:1307549]
Glo1	chr20	10644	7111	83.3501	90.8181	-7.46805	0.917769	6.38665e-13	6.38665e-13	FDR<0.05	-0.112098	negligible	1799.39	1779.62	1819.17	0.203351	0.156638	1.02223	0.87553	0.999945	Not Sig	nonsignificant	.	.	glyoxalase 1 [Source:RGD Symbol;Acc:2702]
Cox4i1	chr19	39782	25782	83.6411	87.0648	-3.42368	0.960677	6.40743e-13	6.40743e-13	FDR<0.05	-0.0592573	negligible	7558.82	7463.08	7654.56	0.197416	0.185508	1.02566	0.85283	0.999945	Not Sig	nonsignificant	.	.	cytochrome c oxidase subunit 4i1 [Source:RGD Symbol;Acc:68374]
Slc17a7	chr1	13652	8148	97.0362	104.537	-7.50115	0.928244	8.94812e-13	8.94812e-13	FDR<0.05	-0.0975496	negligible	951.925	1002.75	901.096	0.28773	-0.524973	0.898621	0.599602	0.999945	Not Sig	nonsignificant	.	.	solute carrier family 17 member 7 [Source:RGD Symbol;Acc:620101]
LOC108348509	chr17	10384	6459	62.8005	68.0761	-5.27563	0.922504	9.2217e-13	9.2217e-13	FDR<0.05	-0.116314	negligible	604.707	570.093	639.32	0.226448	0.733455	1.12143	0.463281	0.999945	Not Sig	nonsignificant	.	.	60S ribosomal protein L35a pseudogene [Source:RGD Symbol;Acc:11442307]
Nop10	chr3	10932	7345	91.0881	98.8229	-7.73479	0.921731	9.23694e-13	9.23694e-13	FDR<0.05	-0.111564	negligible	42.7092	41.9488	43.4696	0.516863	0.0513519	1.03625	0.959045	0.999945	Not Sig	nonsignificant	.	.	NOP10 ribonucleoprotein [Source:RGD Symbol;Acc:1582780]
Rpl13a	chr1	39765	22983	74.7751	72.0685	2.70657	1.03756	9.52785e-13	9.52785e-13	FDR<0.05	0.0689816	negligible	4278.83	3811.88	4745.78	0.215011	1.47153	1.245	0.141147	0.999945	Not Sig	nonsignificant	.	.	ribosomal protein L13A [Source:RGD Symbol;Acc:628697]
Ndufs8	chr1	6728	4675	79.9197	87.6839	-7.76416	0.911453	1.0257e-12	1.0257e-12	FDR<0.05	-0.139081	negligible	1322.99	1358.52	1287.47	0.20911	-0.371326	0.947706	0.710395	0.999945	Not Sig	nonsignificant	.	.	NADH:ubiquinone oxidoreductase core subunit S8 [Source:RGD Symbol;Acc:1309436]
Bola2	chr1	9531	6038	70.2436	75.8892	-5.64561	0.925607	1.11982e-12	1.11982e-12	FDR<0.05	-0.122129	negligible	161.708	154.542	168.874	0.302831	0.421371	1.09274	0.673484	0.999945	Not Sig	nonsignificant	.	.	bolA family member 2 [Source:RGD Symbol;Acc:1565363]
Rtl8a	chrX	5323	3760	92.8454	103.994	-11.1488	0.892794	1.15142e-12	1.15142e-12	FDR<0.05	-0.141837	negligible	515.732	531.367	500.096	0.233389	-0.379726	0.94115	0.704148	0.999945	Not Sig	nonsignificant	.	.	retrotransposon Gag like 8A [Source:RGD Symbol;Acc:1593086]
Mrps14	chr13	3478	2469	85.0458	97.1745	-12.1287	0.875186	1.25348e-12	1.25348e-12	FDR<0.05	-0.183045	negligible	218.965	221.655	216.275	0.290672	-0.140787	0.975728	0.888038	0.999945	Not Sig	nonsignificant	.	.	mitochondrial ribosomal protein S14 [Source:RGD Symbol;Acc:1309432]
Calm1	chr6	51514	27962	101.618	99.1502	2.4676	1.02489	1.29865e-12	1.29865e-12	FDR<0.05	0.0534539	negligible	6904.74	6115.42	7694.05	0.2093	1.58277	1.25814	0.113473	0.999945	Not Sig	nonsignificant	.	Y	calmodulin 1 [Source:RGD Symbol;Acc:2257]
Rpl27	chr10	16817	10479	59.7881	64.2376	-4.44949	0.930734	1.35992e-12	1.35992e-12	FDR<0.05	-0.0986575	negligible	2868	2781.46	2954.54	0.208973	0.419877	1.06223	0.674576	0.999945	Not Sig	nonsignificant	.	.	ribosomal protein L27 [Source:RGD Symbol;Acc:621192]
Dynll1	chr12	29899	18523	101.288	98.9539	2.33358	1.02358	1.42407e-12	1.42407e-12	FDR<0.05	0.0753212	negligible	5473.46	5330	5616.91	0.210691	0.359516	1.05383	0.719209	0.999945	Not Sig	nonsignificant	.	Y	dynein light chain LC8-type 1 [Source:RGD Symbol;Acc:619866]
Ywhah	chr14	6641	4401	100.143	109.981	-9.83791	0.910549	1.49625e-12	1.49625e-12	FDR<0.05	-0.142166	negligible	842.081	881.26	802.902	0.284594	-0.459831	0.911084	0.645638	0.999945	Not Sig	nonsignificant	.	Y	tyrosine 3-monooxygenase/tryptophan 5-monooxygenase activation protein, eta [Source:RGD Symbol;Acc:3978]
Rps15	chr7	28847	18370	69.8105	73.0516	-3.24117	0.955632	1.57326e-12	1.57326e-12	FDR<0.05	-0.0696695	negligible	4858.32	4784.24	4932.4	0.20355	0.218027	1.03097	0.827408	0.999945	Not Sig	nonsignificant	.	.	ribosomal protein S15 [Source:RGD Symbol;Acc:62026]
Hcfc1r1	chr10	7014	4349	84.9969	93.4324	-8.43549	0.909716	1.64394e-12	1.64394e-12	FDR<0.05	-0.121695	negligible	1256.94	1251.52	1262.36	0.219411	0.0621562	1.00867	0.950438	0.999945	Not Sig	nonsignificant	.	.	host cell factor C1 regulator 1 [Source:RGD Symbol;Acc:727975]
Mrps16	chr15	3030	2186	77.244	88.9393	-11.6953	0.868502	1.93622e-12	1.93622e-12	FDR<0.05	-0.203085	small	517.183	519.48	514.887	0.232364	-0.0600273	0.991159	0.952134	0.999945	Not Sig	nonsignificant	.	.	mitochondrial ribosomal protein S16 [Source:RGD Symbol;Acc:1582995]
Mrps21	chr2	6118	3758	81.9158	91.2283	-9.3125	0.897921	2.06433e-12	2.06433e-12	FDR<0.05	-0.146159	negligible	1007.55	950.296	1064.8	0.212595	0.772315	1.1205	0.439928	0.999945	Not Sig	nonsignificant	.	.	mitochondrial ribosomal protein S21 [Source:RGD Symbol;Acc:1592330]
Rps3	chr1	24825	15334	66.1841	70.1091	-3.92495	0.944016	2.12258e-12	2.12258e-12	FDR<0.05	-0.0703091	negligible	4747.88	4514.36	4981.4	0.197948	0.716997	1.10346	0.473376	0.999945	Not Sig	nonsignificant	.	.	ribosomal protein S3 [Source:RGD Symbol;Acc:619888]
Apex1	chr15	2870	1935	86.9144	101.444	-14.5301	0.856768	2.36283e-12	2.36283e-12	FDR<0.05	-0.20471	small	518.864	519.556	518.171	0.23298	-0.0125965	0.997335	0.98995	0.999945	Not Sig	nonsignificant	.	.	apurinic/apyrimidinic endodeoxyribonuclease 1 [Source:RGD Symbol;Acc:2126]
Atp6v1g1	chr5	11601	7772	80.1982	87.1191	-6.92096	0.920558	2.41533e-12	2.41533e-12	FDR<0.05	-0.106571	negligible	1422.72	1430.74	1414.7	0.212283	-0.0817026	0.988786	0.934883	0.999945	Not Sig	nonsignificant	.	Y	ATPase H+ transporting V1 subunit G1 [Source:RGD Symbol;Acc:1310088]
Olfm1	chr3	7435	4598	93.2748	103.459	-10.1842	0.901563	2.47415e-12	2.47415e-12	FDR<0.05	-0.114986	negligible	971.309	968.451	974.167	0.289398	0.0414928	1.0059	0.966903	0.999945	Not Sig	nonsignificant	.	.	olfactomedin 1 [Source:RGD Symbol;Acc:620320]
Ndufa8	chr3	13413	9214	77.0912	82.465	-5.37382	0.934835	2.86704e-12	2.86704e-12	FDR<0.05	-0.108363	negligible	2711.13	2721.59	2700.66	0.201111	-0.0572624	0.992307	0.954336	0.999945	Not Sig	nonsignificant	.	.	NADH:ubiquinone oxidoreductase subunit A8 [Source:RGD Symbol;Acc:1306283]
Ndufs5	chr5	14692	9608	81.9434	87.1456	-5.20218	0.940305	2.9082e-12	2.9082e-12	FDR<0.05	-0.100018	negligible	1038.68	982.113	1095.25	0.214184	0.729563	1.1152	0.465657	0.999945	Not Sig	nonsignificant	.	.	NADH:ubiquinone oxidoreductase subunit S5 [Source:RGD Symbol;Acc:1311081]
Map1lc3b	chr19	9654	6723	111.881	120.891	-9.01005	0.92547	2.91864e-12	2.91864e-12	FDR<0.05	-0.0877934	negligible	1659.06	1654.42	1663.71	0.222464	0.0291614	1.00562	0.976736	0.999945	Not Sig	nonsignificant	.	.	microtubule-associated protein 1 light chain 3 beta [Source:RGD Symbol;Acc:621315]
Atp6v1f	chr4	13181	8569	78.4847	84.4157	-5.931	0.929741	3.71362e-12	3.71362e-12	FDR<0.05	-0.101742	negligible	2554.4	2544.08	2564.73	0.200401	0.0589256	1.00812	0.953011	0.999945	Not Sig	nonsignificant	.	.
Gtf2h5	chr1	5169	3563	93.5825	103.81	-10.2271	0.901482	3.9008e-12	3.9008e-12	FDR<0.05	-0.145899	negligible	1038.73	1035.63	1041.82	0.212117	0.0418409	1.00598	0.966626	0.999945	Not Sig	nonsignificant	.	.	general transcription factor IIH subunit 5 [Source:RGD Symbol;Acc:1560991]
Crym	chr1	5059	3731	89.9992	100.1	-10.1003	0.899097	3.96503e-12	3.96503e-12	FDR<0.05	-0.133142	negligible	1060.36	1134.24	986.481	0.223874	-0.891063	0.869732	0.372896	0.999945	Not Sig	nonsignificant	.	.	crystallin, mu [Source:RGD Symbol;Acc:620943]
Mrpl30	chr9	3539	2420	71.9766	82.7531	-10.7766	0.869775	4.11969e-12	4.11969e-12	FDR<0.05	-0.174213	negligible	684.903	704.893	664.912	0.222589	-0.380256	0.943281	0.703756	0.999945	Not Sig	nonsignificant	.	.	mitochondrial ribosomal protein L30 [Source:RGD Symbol;Acc:1308196]
Tomm7	chr4	9754	6359	84.389	90.4785	-6.08948	0.932697	4.77097e-12	4.77097e-12	FDR<0.05	-0.119241	negligible	1597.98	1557.43	1638.52	0.209882	0.353622	1.05207	0.723622	0.999945	Not Sig	nonsignificant	.	.	translocase of outer mitochondrial membrane 7 [Source:RGD Symbol;Acc:1591393]
Erh	chr6	9498	6005	93.3673	100.919	-7.55171	0.925171	5.64655e-12	5.64655e-12	FDR<0.05	-0.105614	negligible	1829.1	1793.34	1864.85	0.203208	0.277324	1.03988	0.781532	0.999945	Not Sig	nonsignificant	.	Y	ERH, mRNA splicing and mitosis factor [Source:RGD Symbol;Acc:1595409]
Prkar1a	chr10	9113	4640	111.255	103.913	7.34211	1.07066	5.64883e-12	5.64883e-12	FDR<0.05	0.117725	negligible	1500	1285.36	1714.63	0.213388	1.94269	1.33397	0.052054	0.999945	Not Sig	nonsignificant	.	Y	protein kinase cAMP-dependent type I regulatory subunit alpha [Source:RGD Symbol;Acc:3391]
Rps16	chr1	38558	23468	62.1366	64.6944	-2.55779	0.960463	6.30989e-12	6.30989e-12	FDR<0.05	-0.0565401	negligible	7135.25	6835.47	7435.02	0.201412	0.603322	1.08771	0.546294	0.999945	Not Sig	nonsignificant	.	.	ribosomal protein S16 [Source:RGD Symbol;Acc:621031]
Rps27a	chr14	33287	20266	63.9691	66.8165	-2.84742	0.957385	6.50547e-12	6.50547e-12	FDR<0.05	-0.0655883	negligible	108.911	95.1553	122.666	0.347772	1.05394	1.28912	0.291911	0.999945	Not Sig	nonsignificant	.	.	ribosomal protein S27a [Source:RGD Symbol;Acc:6489478]
Ap2m1	chr11	19290	13340	101.156	107.407	-6.25021	0.941808	7.02678e-12	7.02678e-12	FDR<0.05	-0.0828697	negligible	4009.66	4014.91	4004.41	0.212313	-0.0209098	0.997385	0.983318	0.999945	Not Sig	nonsignificant	.	Y	adaptor related protein complex 2 subunit mu 1 [Source:RGD Symbol;Acc:620135]
Tmem130	chr12	9630	6977	92.8648	100.615	-7.75064	0.922968	7.15789e-12	7.15789e-12	FDR<0.05	-0.0957464	negligible	1927.75	1979.29	1876.2	0.225673	-0.348397	0.947913	0.727542	0.999945	Not Sig	nonsignificant	.	.	transmembrane protein 130 [Source:RGD Symbol;Acc:1563248]
LOC103694169	chr18	15249	9163	73.3062	79.1514	-5.8452	0.926152	7.18784e-12	7.18784e-12	FDR<0.05	-0.102085	negligible	2410.51	2309.89	2511.13	0.218581	0.55657	1.08712	0.577821	0.999945	Not Sig	nonsignificant	.	.
Timp1	chrX	222	72	142.403	77.4392	64.9637	1.8389	7.7477e-12	7.7477e-12	FDR<0.05	0.962185	large	24.7038	11.8622	37.5455	0.794323	2.01486	3.16515	0.0439195	0.999945	Not Sig	nonsignificant	.	.	TIMP metallopeptidase inhibitor 1 [Source:RGD Symbol;Acc:621675]
Jagn1	chr4	1874	1522	81.292	102.435	-21.1433	0.793594	8.14027e-12	8.14027e-12	FDR<0.05	-0.230245	small	405.379	454.988	355.769	0.257336	-1.39237	0.781931	0.163811	0.999945	Not Sig	nonsignificant	.	Y	jagunal homolog 1 [Source:RGD Symbol;Acc:1565488]
Akr1a1	chr5	16090	11218	94.005	99.4127	-5.40772	0.945603	8.79561e-12	8.79561e-12	FDR<0.05	-0.0884307	negligible	3157.3	3225.9	3088.69	0.208793	-0.303705	0.957467	0.761353	0.999945	Not Sig	nonsignificant	.	.	aldo-keto reductase family 1 member A1 [Source:RGD Symbol;Acc:68346]
Dynlrb1	chr3	15339	10410	78.9266	84.8915	-5.96483	0.929736	8.87168e-12	8.87168e-12	FDR<0.05	-0.089089	negligible	3020.5	3028.2	3012.81	0.202143	-0.0386798	0.994919	0.969146	0.999945	Not Sig	nonsignificant	.	.	dynein light chain roadblock-type 1 [Source:RGD Symbol;Acc:619910]
Cox6c	chr7	43776	27473	74.9592	78.0179	-3.05876	0.960794	1.01466e-11	1.01466e-11	FDR<0.05	-0.0524278	negligible	7695.85	7514.78	7876.92	0.196548	0.346217	1.04819	0.72918	0.999945	Not Sig	nonsignificant	.	.	cytochrome c oxidase subunit 6C [Source:RGD Symbol;Acc:620616]
Stmn4	chr15	5561	2403	121.364	111.64	9.72451	1.08711	1.08279e-11	1.08279e-11	FDR<0.05	0.158876	negligible	898.644	744.792	1052.5	0.272834	1.83833	1.41314	0.0660134	0.999945	Not Sig	nonsignificant	.	.	stathmin 4 [Source:RGD Symbol;Acc:69349]
Arf3	chr7	5443	3552	99.5737	109.281	-9.70762	0.911169	1.22326e-11	1.22326e-11	FDR<0.05	-0.145312	negligible	428.081	417.358	438.804	0.240656	0.304131	1.05139	0.761028	0.999945	Not Sig	nonsignificant	.	.	ADP-ribosylation factor 3 [Source:RGD Symbol;Acc:621273]
Mrpl17	chr1	4181	3119	106.861	120.03	-13.1687	0.890288	1.30282e-11	1.30282e-11	FDR<0.05	-0.152647	negligible	891.324	929.718	852.929	0.22129	-0.56889	0.917406	0.56943	0.999945	Not Sig	nonsignificant	.	.	mitochondrial ribosomal protein L17 [Source:RGD Symbol;Acc:70943]
Cox5b	chr9	30493	19465	80.3911	84.2266	-3.8356	0.954461	1.31294e-11	1.31294e-11	FDR<0.05	-0.0667547	negligible	5417.48	5334.8	5500.17	0.202125	0.219536	1.031	0.826232	0.999945	Not Sig	nonsignificant	.	.	cytochrome c oxidase subunit 5B [Source:RGD Symbol;Acc:620608]
Schip1	chr2	6507	3811	115.657	106.582	9.07471	1.08514	1.37253e-11	1.37253e-11	FDR<0.05	0.140149	negligible	1254.78	1158.5	1351.07	0.216254	1.01968	1.16622	0.30788	0.999945	Not Sig	nonsignificant	.	.	schwannomin interacting protein 1 [Source:RGD Symbol;Acc:1309962]
Ik	chr18	2150	1023	113.375	94.4537	18.9211	1.20032	1.58661e-11	1.58661e-11	FDR<0.05	0.231201	small	354.739	298.953	410.524	0.278783	1.62489	1.37321	0.104186	0.999945	Not Sig	nonsignificant	.	.
Rpl23a	chr10	23879	15338	59.5812	62.7739	-3.19267	0.94914	1.59207e-11	1.59207e-11	FDR<0.05	-0.0709069	negligible	2999.12	2893.19	3105.06	0.2069	0.495913	1.07323	0.619956	0.999945	Not Sig	nonsignificant	.	.	ribosomal protein L23A [Source:RGD Symbol;Acc:1304897]
Slc2a1	chr5	2145	685	125.626	103.572	22.0538	1.21293	1.62253e-11	1.62253e-11	FDR<0.05	0.305145	small	299.321	192.693	405.949	0.34709	3.10502	2.10672	0.00190268	0.283621	Not Sig	nonsignificant	.	.	solute carrier family 2 member 1 [Source:RGD Symbol;Acc:3704]
Rps27	chr2	25771	15218	64.3855	67.9933	-3.60787	0.946938	1.73083e-11	1.73083e-11	FDR<0.05	-0.0753116	negligible	3303.44	3089.32	3517.55	0.221816	0.848708	1.13862	0.396044	0.999945	Not Sig	nonsignificant	.	.	ribosomal protein S27 [Source:RGD Symbol;Acc:621045]
Psma4	chr8	3264	2352	88.1883	99.531	-11.3427	0.886039	1.84696e-11	1.84696e-11	FDR<0.05	-0.176675	negligible	677.388	699.473	655.303	0.222658	-0.42575	0.936852	0.67029	0.999945	Not Sig	nonsignificant	.	.	proteasome 20S subunit alpha 4 [Source:RGD Symbol;Acc:61846]
Uba52	chr16	33320	20880	73.3073	76.3256	-3.01837	0.960454	1.97638e-11	1.97638e-11	FDR<0.05	-0.0670308	negligible	6314.31	6226.02	6402.61	0.203041	0.20013	1.02836	0.841379	0.999945	Not Sig	nonsignificant	.	.	ubiquitin A-52 residue ribosomal protein fusion product 1 [Source:RGD Symbol;Acc:68344]
Rps10	chr20	14087	8300	60.1431	64.4728	-4.32972	0.932844	2.12267e-11	2.12267e-11	FDR<0.05	-0.104642	negligible	1697.4	1589.63	1805.17	0.237419	0.780123	1.13559	0.435318	0.999945	Not Sig	nonsignificant	.	.	ribosomal protein S10 [Source:RGD Symbol;Acc:621024]
Calr	chr19	9554	5578	78.9339	74.2306	4.70337	1.06336	2.32765e-11	2.32765e-11	FDR<0.05	0.11222	negligible	1683.8	1538.33	1829.26	0.217341	1.1458	1.18912	0.251877	0.999945	Not Sig	nonsignificant	.	.	calreticulin [Source:RGD Symbol;Acc:620288]
Mtln	chr3	2812	1853	82.6756	94.1637	-11.4881	0.877999	2.55256e-11	2.55256e-11	FDR<0.05	-0.206298	small	541.649	531.365	551.933	0.230169	0.242614	1.03871	0.808305	0.999945	Not Sig	nonsignificant	.	.	mitoregulin [Source:RGD Symbol;Acc:10401149]
Ddost	chr5	3551	2168	85.5405	97.4536	-11.9131	0.877756	2.64043e-11	2.64043e-11	FDR<0.05	-0.165117	negligible	655.868	627.753	683.984	0.223422	0.552066	1.08957	0.580903	0.999945	Not Sig	nonsignificant	.	.	dolichyl-diphosphooligosaccharide--protein glycosyltransferase non-catalytic subunit [Source:RGD Symbol;Acc:1308970]
Rps9l1	chr1	14984	9672	68.0951	72.7877	-4.69258	0.935531	2.79742e-11	2.79742e-11	FDR<0.05	-0.0984584	negligible	2927.35	2860.73	2993.97	0.199037	0.329606	1.04657	0.741698	0.999945	Not Sig	nonsignificant	.	.
Msmo1	chr16	6695	3558	109.564	100.584	8.98067	1.08929	2.95053e-11	2.95053e-11	FDR<0.05	0.126794	negligible	1179.36	1062.95	1295.78	0.229992	1.23752	1.21904	0.215893	0.999945	Not Sig	nonsignificant	.	.	methylsterol monooxygenase 1 [Source:RGD Symbol;Acc:620281]
Ddx5	chr10	15965	5751	150.039	139.781	10.2577	1.07338	3.13993e-11	3.13993e-11	FDR<0.05	0.0746205	negligible	2335.03	1609.24	3060.82	0.235581	3.93336	1.90202	8.37654e-05	0.0202904	FDR<0.05	nonsignificant	.	Y	DEAD-box helicase 5 [Source:RGD Symbol;Acc:619906]
Dcakd	chr10	1458	1149	82.234	101.212	-18.9777	0.812495	3.15518e-11	3.15518e-11	FDR<0.05	-0.25851	small	301.646	325.87	277.422	0.258723	-0.905957	0.851327	0.364958	0.999945	Not Sig	nonsignificant	.	.	dephospho-CoA kinase domain containing [Source:RGD Symbol;Acc:1359211]
Rpl32	chr4	22255	13193	52.4191	55.5356	-3.11644	0.943884	3.48073e-11	3.48073e-11	FDR<0.05	-0.0858095	negligible	1766.89	1639.42	1894.37	0.218414	0.959931	1.15551	0.33709	0.999945	Not Sig	nonsignificant	.	.	ribosomal protein L32 [Source:RGD Symbol;Acc:621203]
Gng10	chr5	10825	6665	71.5006	77.3374	-5.83679	0.924528	3.69098e-11	3.69098e-11	FDR<0.05	-0.114796	negligible	2114.95	2038.98	2190.93	0.20234	0.512376	1.07452	0.608388	0.999945	Not Sig	nonsignificant	Y	.	G protein subunit gamma 10 [Source:RGD Symbol;Acc:621514]
Wbp2	chr10	8107	5363	99.6097	108.352	-8.74196	0.919319	3.89615e-11	3.89615e-11	FDR<0.05	-0.107084	negligible	1529.73	1515.63	1543.84	0.210032	0.121993	1.01861	0.902905	0.999945	Not Sig	nonsignificant	.	.	WW domain binding protein 2 [Source:RGD Symbol;Acc:620032]
Psenen	chr1	5611	3759	99.7154	108.406	-8.69045	0.919834	4.09015e-11	4.09015e-11	FDR<0.05	-0.133995	negligible	980.534	978.025	983.043	0.213557	0.0346725	1.00513	0.972341	0.999945	Not Sig	nonsignificant	.	.	presenilin enhancer gamma secretase subunit [Source:RGD Symbol;Acc:1312037]
Atp5mc1	chr10	12268	8234	89.4373	95.0416	-5.60429	0.941033	5.09244e-11	5.09244e-11	FDR<0.05	-0.100081	negligible	2214.38	2195.55	2233.21	0.216487	0.108822	1.01715	0.913343	0.999945	Not Sig	nonsignificant	.	.	ATP synthase membrane subunit c locus 1 [Source:RGD Symbol;Acc:61933]
Ifrd1	chr6	1573	155	177.605	128.221	49.3839	1.38515	5.20897e-11	5.20897e-11	FDR<0.05	0.549499	medium	127.111	34.3014	219.921	0.979877	2.74323	6.41142	0.00608378	0.729238	Not Sig	nonsignificant	.	.	interferon-related developmental regulator 1 [Source:RGD Symbol;Acc:2867]
Dohh	chr7	1851	1159	88.7225	104.416	-15.6933	0.849704	6.31698e-11	6.31698e-11	FDR<0.05	-0.243982	small	344.507	331.97	357.043	0.251558	0.418653	1.07553	0.67547	0.999945	Not Sig	nonsignificant	.	.	deoxyhypusine hydroxylase [Source:RGD Symbol;Acc:1304783]
Atp5f1c	chr17	13941	9343	82.2948	88.128	-5.83322	0.93381	6.31716e-11	6.31716e-11	FDR<0.05	-0.095825	negligible	2851.34	2807.38	2895.3	0.204912	0.214041	1.03132	0.830515	0.999945	Not Sig	nonsignificant	.	.	ATP synthase F1 subunit gamma [Source:RGD Symbol;Acc:620011]
Mrpl27	chr10	3233	2194	74.506	84.7956	-10.2896	0.878654	6.78158e-11	6.78158e-11	FDR<0.05	-0.190509	negligible	643.31	650.114	636.506	0.223696	-0.135928	0.979069	0.891878	0.999945	Not Sig	nonsignificant	.	.	mitochondrial ribosomal protein L27 [Source:RGD Symbol;Acc:1309090]
Rps23	chr2	39450	24435	58.1457	60.5839	-2.43816	0.959756	7.20329e-11	7.20329e-11	FDR<0.05	-0.064029	negligible	6254.75	6041.8	6467.7	0.20935	0.471059	1.07049	0.637599	0.999945	Not Sig	nonsignificant	.	.	ribosomal protein S23 [Source:RGD Symbol;Acc:621039]
Ube2v1	chr3	6208	4462	92.8769	101.467	-8.59034	0.915339	7.20942e-11	7.20942e-11	FDR<0.05	-0.1158	negligible	454.713	450.93	458.496	0.24278	0.0852346	1.01678	0.932075	0.999945	Not Sig	nonsignificant	.	.
Mdh1	chr14	24078	17456	105.571	110.936	-5.36544	0.951635	8.02772e-11	8.02772e-11	FDR<0.05	-0.0653504	negligible	4301.12	4461.27	4140.97	0.230183	-0.470145	0.928205	0.638251	0.999945	Not Sig	nonsignificant	.	Y	malate dehydrogenase 1 [Source:RGD Symbol;Acc:3072]
Mtch2	chr3	4953	3447	84.421	93.4871	-9.06604	0.903024	8.36941e-11	8.36941e-11	FDR<0.05	-0.145759	negligible	898.356	928.674	868.039	0.235607	-0.42381	0.934707	0.671704	0.999945	Not Sig	nonsignificant	Y	.	mitochondrial carrier 2 [Source:RGD Symbol;Acc:1308080]
Ndufv2	chr9	9775	6673	78.5761	85.1172	-6.54111	0.923152	8.71875e-11	8.71875e-11	FDR<0.05	-0.109616	negligible	1955.36	1966.99	1943.72	0.203036	-0.0838279	0.98817	0.933193	0.999945	Not Sig	nonsignificant	.	.	NADH:ubiquinone oxidoreductase core subunit V2 [Source:RGD Symbol;Acc:621733]
LOC100360841	chr9	36998	22070	60.8697	63.1929	-2.3232	0.963236	9.22651e-11	9.22651e-11	FDR<0.05	-0.0588002	negligible	1064.97	1034.45	1095.5	0.219341	0.385386	1.05902	0.699951	0.999945	Not Sig	nonsignificant	.	.
Srp19	chr18	3868	2786	85.5333	96.6089	-11.0756	0.885356	9.8284e-11	9.8284e-11	FDR<0.05	-0.178009	negligible	781.417	792.636	770.199	0.22126	-0.18396	0.971693	0.854045	0.999945	Not Sig	nonsignificant	.	.	signal recognition particle 19 [Source:RGD Symbol;Acc:1308437]
Arl1	chr7	3310	2331	90.8844	103.068	-12.1832	0.881794	9.90479e-11	9.90479e-11	FDR<0.05	-0.168853	negligible	70.7932	74.889	66.6975	0.40993	-0.436394	0.890618	0.662551	0.999945	Not Sig	nonsignificant	.	.	ADP-ribosylation factor like GTPase 1 [Source:RGD Symbol;Acc:621326]
Ap1s1	chr12	3604	2135	92.8563	106.073	-13.2171	0.875396	1.02187e-10	1.02187e-10	FDR<0.05	-0.169477	negligible	650.201	612.431	687.971	0.234239	0.728256	1.12334	0.466457	0.999945	Not Sig	nonsignificant	.	.	adaptor related protein complex 1 subunit sigma 1 [Source:RGD Symbol;Acc:1305911]
Tmsb15b2	chrX	1774	770	123.383	107.268	16.1152	1.15023	1.08311e-10	1.08311e-10	FDR<0.05	0.271454	small	189.046	156.138	221.955	0.3034	1.70036	1.42153	0.0890638	0.999945	Not Sig	nonsignificant	.	.	thymosin beta 15B2 [Source:RGD Symbol;Acc:708373]
Ndufab1	chr1	11968	6801	74.866	80.9915	-6.12558	0.924368	1.11784e-10	1.11784e-10	FDR<0.05	-0.107615	negligible	2195.77	2055.95	2335.58	0.22454	0.825584	1.13601	0.40904	0.999945	Not Sig	nonsignificant	.	Y	NADH:ubiquinone oxidoreductase subunit AB1 [Source:RGD Symbol;Acc:1305619]
Prkacb	chr2	2284	1574	89.0172	103.987	-14.9699	0.856041	1.12316e-10	1.12316e-10	FDR<0.05	-0.198556	negligible	304.496	322.885	286.108	0.286936	-0.62041	0.886098	0.534988	0.999945	Not Sig	nonsignificant	.	Y	protein kinase cAMP-activated catalytic subunit beta [Source:RGD Symbol;Acc:1310574]
Ndufc2	chr1	13200	8803	90.3649	96.3306	-5.96575	0.93807	1.13085e-10	1.13085e-10	FDR<0.05	-0.0880765	negligible	2501.92	2490.93	2512.91	0.201985	0.0606557	1.00882	0.951633	0.999945	Not Sig	nonsignificant	.	.	NADH:ubiquinone oxidoreductase subunit C2 [Source:RGD Symbol;Acc:1307511]
Arl6ip5	chr4	6839	4907	95.4176	105.284	-9.86626	0.906289	1.21704e-10	1.21704e-10	FDR<0.05	-0.11737	negligible	1421.04	1458.29	1383.8	0.213758	-0.359704	0.948922	0.719069	0.999945	Not Sig	nonsignificant	.	Y	ADP-ribosylation factor like GTPase 6 interacting protein 5 [Source:RGD Symbol;Acc:708572]
Ndufs7	chr7	8635	5783	91.6454	100.316	-8.67026	0.91357	1.22518e-10	1.22518e-10	FDR<0.05	-0.0954763	negligible	1597.85	1591.27	1604.44	0.205253	0.0590782	1.00828	0.95289	0.999945	Not Sig	nonsignificant	.	.	NADH:ubiquinone oxidoreductase core subunit S7 [Source:RGD Symbol;Acc:1310013]
Selenoh	chr3	3254	2407	91.7127	103.884	-12.1711	0.882839	1.23919e-10	1.23919e-10	FDR<0.05	-0.182954	negligible	645.185	673.705	616.664	0.22442	-0.564694	0.915332	0.572282	0.999945	Not Sig	nonsignificant	.	.	selenoprotein H [Source:RGD Symbol;Acc:1563348]
Timm17a	chr13	3667	2786	78.7832	90.4603	-11.6771	0.870914	1.32377e-10	1.32377e-10	FDR<0.05	-0.160438	negligible	757.357	793.661	721.053	0.22242	-0.627197	0.908515	0.53053	0.999945	Not Sig	nonsignificant	.	.	translocase of inner mitochondrial membrane 17A [Source:RGD Symbol;Acc:3862]
Mrpl13	chr7	2190	1471	71.963	84.3916	-12.4286	0.852728	1.32603e-10	1.32603e-10	FDR<0.05	-0.236885	small	447.651	449.827	445.475	0.236995	-0.0554987	0.990326	0.955741	0.999945	Not Sig	nonsignificant	.	.	mitochondrial ribosomal protein L13 [Source:RGD Symbol;Acc:1359587]
Romo1	chr3	10336	6326	82.5746	88.5078	-5.93326	0.932963	1.33736e-10	1.33736e-10	FDR<0.05	-0.105393	negligible	1527.32	1445.39	1609.25	0.21407	0.728932	1.11337	0.466043	0.999945	Not Sig	nonsignificant	.	.	reactive oxygen species modulator 1 [Source:RGD Symbol;Acc:1587111]
Pgk1	chrX	13688	9659	112.953	119.863	-6.91053	0.942346	1.38221e-10	1.38221e-10	FDR<0.05	-0.0841436	negligible	2827.1	2874.08	2780.13	0.2097	-0.232306	0.967311	0.8163	0.999945	Not Sig	nonsignificant	.	.	phosphoglycerate kinase 1 [Source:RGD Symbol;Acc:619878]
Ypel5	chr6	3620	2512	103.468	118.402	-14.9339	0.873871	1.39528e-10	1.39528e-10	FDR<0.05	-0.149989	negligible	502.523	496.387	508.658	0.252368	0.124073	1.02472	0.901258	0.999945	Not Sig	nonsignificant	.	Y	yippee-like 5 [Source:RGD Symbol;Acc:1309657]
Hist3h2a	chr10	3046	1534	120.095	106.683	13.4128	1.12573	1.47279e-10	1.47279e-10	FDR<0.05	0.198593	negligible	330.716	282.481	378.95	0.253504	1.66376	1.3415	0.0961613	0.999945	Not Sig	nonsignificant	.	.
Rpl27a	chr1	32588	20143	61.506	64.3295	-2.82347	0.956109	1.47525e-10	1.47525e-10	FDR<0.05	-0.0603779	negligible	4036.17	3894.85	4177.49	0.207126	0.490093	1.07257	0.624068	0.999945	Not Sig	nonsignificant	.	.
Psap	chr20	26633	17791	118.584	124.277	-5.69249	0.954195	1.55299e-10	1.55299e-10	FDR<0.05	-0.0668226	negligible	5185.22	5137.53	5232.91	0.205361	0.127107	1.01857	0.898856	0.999945	Not Sig	nonsignificant	.	.	prosaposin [Source:RGD Symbol;Acc:3423]
Ctsb	chr15	11358	7839	101.55	108.39	-6.84011	0.936894	1.55978e-10	1.55978e-10	FDR<0.05	-0.0938226	negligible	2301.56	2301.21	2301.91	0.213907	-0.0028103	1.0003	0.997758	0.999945	Not Sig	nonsignificant	.	.	cathepsin B [Source:RGD Symbol;Acc:621509]
RGD1561113	chr3	5337	2689	98.9514	109.475	-10.5234	0.903874	1.59453e-10	1.59453e-10	FDR<0.05	-0.153125	negligible	909.324	827.03	991.618	0.279493	0.951427	1.19901	0.341388	0.999945	Not Sig	nonsignificant	.	.
Comt	chr11	955	640	84.3845	112.856	-28.4714	0.747719	1.76818e-10	1.76818e-10	FDR<0.05	-0.344312	small	157.807	157.37	158.243	0.304838	0.0211254	1.00555	0.983146	0.999945	Not Sig	nonsignificant	.	.	catechol-O-methyltransferase [Source:RGD Symbol;Acc:2379]
Lonrf3	chrX	459	113	166.554	104.147	62.4068	1.59922	1.91048e-10	1.91048e-10	FDR<0.05	0.69057	medium	18.7395	6.75545	30.7235	0.875422	2.58772	4.54796	0.00966143	0.999945	Not Sig	nonsignificant	.	.	LON peptidase N-terminal domain and ring finger 3 [Source:RGD Symbol;Acc:1565451]
Mien1	chr10	3264	2201	104.921	117.098	-12.1767	0.896012	1.93826e-10	1.93826e-10	FDR<0.05	-0.176432	negligible	631.972	629.376	634.568	0.231906	0.0515637	1.00825	0.958876	0.999945	Not Sig	nonsignificant	.	.	migration and invasion enhancer 1 [Source:RGD Symbol;Acc:1306682]
Scg5	chr3	20000	13798	109.079	115.812	-6.73277	0.941864	1.97093e-10	1.97093e-10	FDR<0.05	-0.0735764	negligible	4057.58	4091.91	4023.25	0.205058	-0.12136	0.983222	0.903406	0.999945	Not Sig	nonsignificant	.	.	secretogranin V [Source:RGD Symbol;Acc:3669]
Cox7b	chrX	16654	11295	91.417	96.1714	-4.75441	0.950563	1.99318e-10	1.99318e-10	FDR<0.05	-0.0749916	negligible	2992.63	3007.05	2978.21	0.198455	-0.0695925	0.990408	0.944518	0.999945	Not Sig	nonsignificant	.	.	cytochrome c oxidase subunit 7B [Source:RGD Symbol;Acc:727789]
LOC100912557	chr6	14281	9050	85.7616	90.9401	-5.17848	0.943056	2.40512e-10	2.40512e-10	FDR<0.05	-0.088688	negligible	404.505	364.255	444.755	0.24689	1.17379	1.221	0.240481	0.999945	Not Sig	nonsignificant	.	.
Commd3	chr17	4338	3062	86.9885	98.8388	-11.8503	0.880105	2.40591e-10	2.40591e-10	FDR<0.05	-0.15311	negligible	872.974	877.057	868.891	0.215581	-0.0632719	0.990689	0.94955	0.999945	Not Sig	nonsignificant	.	.	COMM domain containing 3 [Source:RGD Symbol;Acc:735116]
Med28	chr14	2015	1345	79.9823	94.277	-14.2948	0.848375	2.41779e-10	2.41779e-10	FDR<0.05	-0.214952	small	22.5971	18.3555	26.8387	0.654671	0.834201	1.46216	0.404168	0.999945	Not Sig	nonsignificant	.	.	mediator complex subunit 28 [Source:RGD Symbol;Acc:1305875]
H3f3b	chr10	36591	7755	110.91	102.244	8.66575	1.08476	2.43684e-10	2.43684e-10	FDR<0.05	0.0679873	negligible	3300.66	1514.79	5086.53	0.213401	8.18459	3.3579	2.73228e-16	4.53831e-13	FDR<0.05	upregulated	Y	Y	H3.3 histone B [Source:RGD Symbol;Acc:621095]
Dnajc15	chr15	3365	2196	83.139	93.6077	-10.4687	0.888164	2.89686e-10	2.89686e-10	FDR<0.05	-0.161353	negligible	566.709	555.142	578.275	0.229491	0.256209	1.04167	0.79779	0.999945	Not Sig	nonsignificant	Y	Y	DnaJ heat shock protein family (Hsp40) member C15 [Source:RGD Symbol;Acc:1307154]
Nrsn2	chr3	3457	2447	86.5649	97.8314	-11.2665	0.884837	2.93932e-10	2.93932e-10	FDR<0.05	-0.176295	negligible	717.357	746.003	688.711	0.224427	-0.515272	0.923202	0.606363	0.999945	Not Sig	nonsignificant	.	.	neurensin 2 [Source:RGD Symbol;Acc:1586322]
Cox7a2	chr8	20126	12873	95.0947	99.5436	-4.44892	0.955307	2.97086e-10	2.97086e-10	FDR<0.05	-0.0709188	negligible	2777.65	2620.93	2934.36	0.19939	0.818302	1.11959	0.413185	0.999945	Not Sig	nonsignificant	.	.	cytochrome c oxidase subunit 7A2 [Source:RGD Symbol;Acc:68365]
Nme2	chr10	20013	12683	84.1991	88.7453	-4.54628	0.948772	3.17642e-10	3.17642e-10	FDR<0.05	-0.0746944	negligible	3758.92	3619.4	3898.44	0.197888	0.542328	1.07709	0.587593	0.999945	Not Sig	nonsignificant	.	.	NME/NM23 nucleoside diphosphate kinase 2 [Source:RGD Symbol;Acc:619877]
Rnf7	chr8	3586	2459	84.6728	95.8577	-11.1849	0.883318	3.22799e-10	3.22799e-10	FDR<0.05	-0.171811	negligible	216.506	229.983	203.03	0.306301	-0.61505	0.882803	0.538521	0.999945	Not Sig	nonsignificant	.	.	ring finger protein 7 [Source:RGD Symbol;Acc:1311048]
ND1	chrM	257148	169971	52.9409	53.3018	-0.36093	0.993229	3.38843e-10	3.38843e-10	FDR<0.05	-0.0120488	negligible	45126	45664.8	44587.2	0.203636	-0.168969	0.976402	0.865821	0.999945	Not Sig	nonsignificant	.	.	mitochondrially encoded NADH:ubiquinone oxidoreductase core subunit 1 [Source:RGD Symbol;Acc:620555]
Psmd7	chr19	3517	2297	84.7977	97.0206	-12.223	0.874017	3.47787e-10	3.47787e-10	FDR<0.05	-0.168428	negligible	628.38	625.582	631.177	0.229575	0.0463425	1.00894	0.963037	0.999945	Not Sig	nonsignificant	.	.	proteasome 26S subunit, non-ATPase 7 [Source:RGD Symbol;Acc:1306902]
Ppial4d	chr14	126934	80461	90.1468	92.3355	-2.18861	0.976297	3.62037e-10	3.62037e-10	FDR<0.05	-0.0245488	negligible	37034.3	36019.6	38049	0.192925	0.40974	1.05634	0.681997	0.999945	Not Sig	nonsignificant	.	.	peptidylprolyl isomerase A (cyclophilin A)-like 4D [Source:RGD Symbol;Acc:2321083]
Mrpl41	chr3	3952	3232	108.16	120.211	-12.0511	0.89975	3.88926e-10	3.88926e-10	FDR<0.05	-0.136087	negligible	189.894	191.148	188.641	0.288891	-0.0549484	0.986888	0.95618	0.999945	Not Sig	nonsignificant	.	.	mitochondrial ribosomal protein L41 [Source:RGD Symbol;Acc:1310241]
Vps29	chr12	9499	6131	102.551	111.608	-9.0574	0.918846	4.00711e-10	4.00711e-10	FDR<0.05	-0.105557	negligible	1735.39	1678.45	1792.33	0.212427	0.440396	1.06785	0.659651	0.999945	Not Sig	nonsignificant	.	.	VPS29 retromer complex component [Source:RGD Symbol;Acc:1308332]
Lrrn3	chr6	1570	462	119.582	95.0174	24.5651	1.25853	4.06233e-10	4.06233e-10	FDR<0.05	0.317358	small	190.271	109.218	271.325	0.316099	4.10634	2.48425	4.01971e-05	0.0116843	FDR<0.05	upregulated	.	.	leucine rich repeat neuronal 3 [Source:RGD Symbol;Acc:71066]
Arpc1a	chr12	9237	6034	99.0179	107.611	-8.59319	0.920146	4.084e-10	4.084e-10	FDR<0.05	-0.103048	negligible	1873.17	1819.11	1927.22	0.208561	0.39491	1.05943	0.692909	0.999945	Not Sig	nonsignificant	.	.	actin related protein 2/3 complex, subunit 1A [Source:RGD Symbol;Acc:620834]
Vdac2	chr15	8188	5418	88.6772	97.0588	-8.38157	0.913644	4.12503e-10	4.12503e-10	FDR<0.05	-0.10654	negligible	1639.45	1634.14	1644.77	0.206242	0.0425013	1.0065	0.966099	0.999945	Not Sig	nonsignificant	.	.	voltage-dependent anion channel 2 [Source:RGD Symbol;Acc:621576]
Atp5f1a	chr18	18096	12335	96.4558	102.243	-5.78722	0.943397	4.12874e-10	4.12874e-10	FDR<0.05	-0.0760284	negligible	3625.66	3639.36	3611.96	0.215286	-0.0540634	0.99247	0.956885	0.999945	Not Sig	nonsignificant	.	.	ATP synthase F1 subunit alpha [Source:RGD Symbol;Acc:619993]
Cfdp1	chr19	2924	1845	85.1083	97.5055	-12.3972	0.872857	4.20216e-10	4.20216e-10	FDR<0.05	-0.18428	negligible	515.841	507.459	524.224	0.232568	0.205133	1.03304	0.837468	0.999945	Not Sig	nonsignificant	Y	.	craniofacial development protein 1 [Source:RGD Symbol;Acc:735080]
Hmox2	chr10	3460	2327	91.4402	102.812	-11.3714	0.889396	4.36587e-10	4.36587e-10	FDR<0.05	-0.149264	negligible	641.309	627.941	654.676	0.244558	0.231496	1.04258	0.816929	0.999945	Not Sig	nonsignificant	.	.	heme oxygenase 2 [Source:RGD Symbol;Acc:67402]
Atp5mc2	chr7	15680	10296	85.722	90.6321	-4.91012	0.945824	4.46098e-10	4.46098e-10	FDR<0.05	-0.090157	negligible	2980.92	2932.14	3029.7	0.19908	0.237362	1.03327	0.812376	0.999945	Not Sig	nonsignificant	.	.	ATP synthase membrane subunit c locus 2 [Source:RGD Symbol;Acc:620051]
Polr3k	chr3	3778	2634	99.8067	111.176	-11.3693	0.897736	4.82888e-10	4.82888e-10	FDR<0.05	-0.134843	negligible	742.509	731.946	753.071	0.228945	0.167888	1.02886	0.866672	0.999945	Not Sig	nonsignificant	.	.	RNA polymerase III subunit K [Source:RGD Symbol;Acc:1587294]
Psma6	chr6	5739	3954	81.0306	90.065	-9.03441	0.89969	4.8399e-10	4.8399e-10	FDR<0.05	-0.142133	negligible	1104.47	1132.67	1076.28	0.215048	-0.344896	0.950208	0.730173	0.999945	Not Sig	nonsignificant	.	.	proteasome 20S subunit alpha 6 [Source:RGD Symbol;Acc:61849]
Nudt16l1	chr10	2041	1575	97.7346	113.162	-15.4272	0.863671	5.00781e-10	5.00781e-10	FDR<0.05	-0.164217	negligible	396.527	441.317	351.737	0.247507	-1.32243	0.797017	0.186024	0.999945	Not Sig	nonsignificant	.	.	nudix hydrolase 16 like 1 [Source:RGD Symbol;Acc:1561451]
Sez6l2	chr1	3277	1972	90.9766	104.866	-13.8894	0.867551	5.20564e-10	5.20564e-10	FDR<0.05	-0.162156	negligible	441.559	454.217	428.901	0.325138	-0.233105	0.944264	0.81568	0.999945	Not Sig	nonsignificant	.	.	seizure related 6 homolog like 2 [Source:RGD Symbol;Acc:1565281]
Ndufa2	chr18	11556	7231	78.881	83.9753	-5.09428	0.939336	5.23801e-10	5.23801e-10	FDR<0.05	-0.101153	negligible	2014.97	1961.86	2068.09	0.206855	0.371479	1.05415	0.710281	0.999945	Not Sig	nonsignificant	.	.	NADH:ubiquinone oxidoreductase subunit A2 [Source:RGD Symbol;Acc:1309997]
Polr2e	chr7	3513	2318	86.1036	96.9863	-10.8827	0.887791	5.34517e-10	5.34517e-10	FDR<0.05	-0.155438	negligible	708.683	706.544	710.822	0.221957	0.0349095	1.00606	0.972152	0.999945	Not Sig	nonsignificant	.	.	RNA polymerase II, I and III subunit E [Source:RGD Symbol;Acc:1589817]
Tmeff2	chr9	1813	1060	92.3803	110.094	-17.7133	0.839107	5.41805e-10	5.41805e-10	FDR<0.05	-0.23814	small	311.974	287.795	336.152	0.258669	0.873317	1.16803	0.38249	0.999945	Not Sig	nonsignificant	.	Y	transmembrane protein with EGF-like and two follistatin-like domains 2 [Source:RGD Symbol;Acc:1308839]
Sdhc	chr13	6033	4221	85.7988	93.9234	-8.12466	0.913497	5.50508e-10	5.50508e-10	FDR<0.05	-0.131501	negligible	1241.49	1227.73	1255.26	0.209997	0.149572	1.02243	0.881103	0.999945	Not Sig	nonsignificant	.	.	succinate dehydrogenase complex subunit C [Source:RGD Symbol;Acc:1359454]
Rpl7	chr5	10244	6626	65.2055	70.1882	-4.98268	0.92901	5.65165e-10	5.65165e-10	FDR<0.05	-0.0994827	negligible	1503.26	1439.82	1566.7	0.210058	0.578372	1.08812	0.563013	0.999945	Not Sig	nonsignificant	.	.
Sub1	chr2	13366	7607	96.4502	91.7567	4.69351	1.05115	5.65471e-10	5.65471e-10	FDR<0.05	0.0970761	negligible	2375.26	2219.1	2531.42	0.20212	0.939874	1.14074	0.347282	0.999945	Not Sig	nonsignificant	.	Y	SUB1 regulator of transcription [Source:RGD Symbol;Acc:621582]
Fosl2	chr6	1230	134	137.875	94.1829	43.6918	1.4639	6.11789e-10	6.11789e-10	FDR<0.05	0.5088	medium	23.903	5.13211	42.6738	0.811939	3.84236	8.31507	0.000121856	0.0272464	FDR<0.05	upregulated	.	Y	FOS like 2, AP-1 transcription factor subunit [Source:RGD Symbol;Acc:2628]
Sec61b	chr5	4838	3102	86.2987	95.5446	-9.24584	0.90323	6.13249e-10	6.13249e-10	FDR<0.05	-0.157201	negligible	929.162	898.137	960.187	0.215049	0.445182	1.06909	0.656188	0.999945	Not Sig	nonsignificant	.	.	SEC61 translocon subunit beta [Source:RGD Symbol;Acc:1304997]
Insig1	chr4	1691	341	151.743	117.647	34.0955	1.28981	6.18078e-10	6.18078e-10	FDR<0.05	0.311135	small	104.869	48.2055	161.533	0.432166	4.08382	3.35093	4.4302e-05	0.0122643	FDR<0.05	upregulated	.	.	insulin induced gene 1 [Source:RGD Symbol;Acc:708457]
Atp6v0b	chr5	13702	9528	94.3187	100.913	-6.59381	0.934658	7.46368e-10	7.46368e-10	FDR<0.05	-0.0824699	negligible	161.878	155.377	168.379	0.385537	0.334613	1.08368	0.737917	0.999945	Not Sig	nonsignificant	.	.	ATPase H+ transporting V0 subunit B [Source:RGD Symbol;Acc:1308303]
Higd2a	chr17	9068	6069	111.423	120.108	-8.68583	0.927683	7.73198e-10	7.73198e-10	FDR<0.05	-0.0990932	negligible	1734.92	1720.42	1749.41	0.207654	0.113431	1.01685	0.909689	0.999945	Not Sig	nonsignificant	.	Y	HIG1 hypoxia inducible domain family, member 2A [Source:RGD Symbol;Acc:1309691]
Mrpl55	chr10	3049	2011	79.7456	90.7614	-11.0157	0.87863	8.01428e-10	8.01428e-10	FDR<0.05	-0.162772	negligible	557.452	545.193	569.71	0.23064	0.271093	1.04497	0.786319	0.999945	Not Sig	nonsignificant	.	.	mitochondrial ribosomal protein L55 [Source:RGD Symbol;Acc:1308161]
Rack1	chr10	11217	7122	82.9096	88.6845	-5.77487	0.934883	8.19902e-10	8.19902e-10	FDR<0.05	-0.0935148	negligible	2113.69	2067.19	2160.2	0.204421	0.307838	1.045	0.758205	0.999945	Not Sig	nonsignificant	.	.	receptor for activated C kinase 1 [Source:RGD Symbol;Acc:69229]
Tceal1	chrX	2049	1442	83.331	98.0055	-14.6745	0.850269	8.24686e-10	8.24686e-10	FDR<0.05	-0.19957	negligible	419.986	433.91	406.062	0.250757	-0.398366	0.93582	0.690361	0.999945	Not Sig	nonsignificant	Y	Y	transcription elongation factor A like 1 [Source:RGD Symbol;Acc:1549724]
Gon7	chr6	1851	1289	104.302	122.22	-17.9173	0.853401	8.4224e-10	8.4224e-10	FDR<0.05	-0.212412	small	185.382	184.289	186.475	0.293496	0.0454855	1.01186	0.96372	0.999945	Not Sig	nonsignificant	.	Y	GON7 subunit of KEOPS complex [Source:RGD Symbol;Acc:2302582]
Lsm7	chr7	4594	3181	79.6643	89.409	-9.74462	0.891011	9.37843e-10	9.37843e-10	FDR<0.05	-0.149961	negligible	757.112	756.423	757.801	0.220323	0.0129285	1.00182	0.989685	0.999945	Not Sig	nonsignificant	.	.	LSM7 homolog, U6 small nuclear RNA and mRNA degradation associated [Source:RGD Symbol;Acc:1305354]
Cox8a	chr1	22450	8001	99.0335	103.952	-4.91885	0.952682	1.05399e-09	1.05399e-09	FDR<0.05	-0.0815396	negligible	3145.18	2367.09	3923.27	0.946229	0.770671	1.65743	0.440902	0.999945	Not Sig	nonsignificant	.	.
Dad1	chr15	10315	6314	89.4095	96.0376	-6.62812	0.930984	1.15645e-09	1.15645e-09	FDR<0.05	-0.0932099	negligible	1918.33	1823	2013.66	0.203509	0.706506	1.10458	0.479874	0.999945	Not Sig	nonsignificant	.	.	defender against cell death 1 [Source:RGD Symbol;Acc:621028]
Sf3b6	chr6	2438	1746	84.3623	97.1128	-12.7505	0.868704	1.2181e-09	1.2181e-09	FDR<0.05	-0.179407	negligible	360.665	358.34	362.99	0.260977	0.0524602	1.01298	0.958162	0.999945	Not Sig	nonsignificant	.	.	splicing factor 3B, subunit 6 [Source:RGD Symbol;Acc:2318878]
Uchl1	chr14	77101	54522	104.563	107.5	-2.93738	0.972676	1.28886e-09	1.28886e-09	FDR<0.05	-0.0236098	negligible	15678.1	15914	15442.2	0.202477	-0.215156	0.970351	0.829646	0.999945	Not Sig	nonsignificant	.	.	ubiquitin C-terminal hydrolase L1 [Source:RGD Symbol;Acc:3928]
Rpl35	chr3	37215	22774	60.9304	63.1212	-2.19083	0.965292	1.29372e-09	1.29372e-09	FDR<0.05	-0.0452857	negligible	6768.68	6523.78	7013.58	0.208953	0.501525	1.07508	0.616001	0.999945	Not Sig	nonsignificant	.	.	ribosomal protein L35 [Source:RGD Symbol;Acc:1303007]
Sdhb	chr5	6185	4236	81.4604	89.4237	-7.96331	0.910949	1.32281e-09	1.32281e-09	FDR<0.05	-0.120169	negligible	1081.29	1069.63	1092.96	0.218609	0.135746	1.02182	0.892022	0.999945	Not Sig	nonsignificant	.	.	succinate dehydrogenase complex iron sulfur subunit B [Source:RGD Symbol;Acc:1308598]
Micos13	chr9	10240	7003	83.2671	88.6043	-5.33727	0.939763	1.38364e-09	1.38364e-09	FDR<0.05	-0.096341	negligible	1806.31	1820.18	1792.43	0.204591	-0.108456	0.984757	0.913634	0.999945	Not Sig	nonsignificant	.	.	mitochondrial contact site and cristae organizing system subunit 13 [Source:RGD Symbol;Acc:1588578]
Atp5mg	chr8	26412	16784	87.8758	91.2887	-3.41281	0.962615	1.42904e-09	1.42904e-09	FDR<0.05	-0.0633685	negligible	4682.93	4523.32	4842.55	0.197979	0.497925	1.07057	0.618537	0.999945	Not Sig	nonsignificant	.	.	ATP synthase membrane subunit g [Source:RGD Symbol;Acc:1303259]
LOC685963	chr3	17495	10398	68.3768	72.181	-3.80419	0.947296	1.45739e-09	1.45739e-09	FDR<0.05	-0.0872917	negligible	5666.07	5339.36	5992.78	0.216558	0.771624	1.12238	0.440337	0.999945	Not Sig	nonsignificant	.	.
Zfp637	chr4	2823	2126	86.2382	99.0363	-12.7981	0.870774	1.50621e-09	1.50621e-09	FDR<0.05	-0.135981	negligible	564.993	591.726	538.26	0.250792	-0.558399	0.909643	0.576572	0.999945	Not Sig	nonsignificant	.	.	zinc finger protein 637 [Source:RGD Symbol;Acc:1559850]
Zfand5	chr1	1699	475	130.766	106.799	23.9677	1.22442	1.57398e-09	1.57398e-09	FDR<0.05	0.293824	small	134.803	90.5454	179.061	0.413785	2.41555	1.97758	0.0157115	0.999945	Not Sig	nonsignificant	.	Y	zinc finger AN1-type containing 5 [Source:RGD Symbol;Acc:1310776]
Snn	chr10	1061	741	101.837	129.55	-27.7135	0.786079	1.57817e-09	1.57817e-09	FDR<0.05	-0.273521	small	129.517	134.352	124.681	0.343916	-0.285212	0.928017	0.775482	0.999945	Not Sig	nonsignificant	.	Y	stannin [Source:RGD Symbol;Acc:3730]
Prickle4	chr9	6136	3790	91.9094	100.142	-8.23232	0.917793	1.58377e-09	1.58377e-09	FDR<0.05	-0.130951	negligible	34.2454	25.817	42.6738	0.684374	1.14073	1.65294	0.253982	0.999945	Not Sig	nonsignificant	.	.	prickle planar cell polarity protein 4 [Source:RGD Symbol;Acc:1563979]
Eef1g	chr1	10512	7058	74.3897	79.6591	-5.26937	0.933851	1.67368e-09	1.67368e-09	FDR<0.05	-0.104591	negligible	2055.81	2040.11	2071.5	0.205596	0.10429	1.01539	0.916939	0.999945	Not Sig	nonsignificant	.	.	eukaryotic translation elongation factor 1 gamma [Source:RGD Symbol;Acc:1302939]
Polr2f	chr7	4296	2751	82.1993	91.3505	-9.15121	0.899823	1.70755e-09	1.70755e-09	FDR<0.05	-0.148843	negligible	786.542	771.088	801.996	0.220604	0.256037	1.04008	0.797922	0.999945	Not Sig	nonsignificant	.	.	RNA polymerase II, I and III subunit F [Source:RGD Symbol;Acc:708567]
Resp18	chr9	9297	6362	93.3978	99.7725	-6.37473	0.936107	1.74865e-09	1.74865e-09	FDR<0.05	-0.092859	negligible	1842.06	1873.96	1810.16	0.203635	-0.243822	0.965954	0.807369	0.999945	Not Sig	nonsignificant	.	.	regulated endocrine-specific protein 18 [Source:RGD Symbol;Acc:3555]
Chchd1	chr15	3074	2113	83.6347	95.1453	-11.5106	0.879021	1.77565e-09	1.77565e-09	FDR<0.05	-0.169594	negligible	530.343	536.265	524.422	0.232336	-0.14595	0.977916	0.883961	0.999945	Not Sig	nonsignificant	.	.	coiled-coil-helix-coiled-coil-helix domain containing 1 [Source:RGD Symbol;Acc:1307134]
Ndufaf3	chr8	1866	1313	85.9491	99.7093	-13.7602	0.861997	2.14535e-09	2.14535e-09	FDR<0.05	-0.201239	small	207.887	218.668	197.106	0.280109	-0.530856	0.901395	0.595518	0.999945	Not Sig	nonsignificant	.	.	NADH:ubiquinone oxidoreductase complex assembly factor 3 [Source:RGD Symbol;Acc:708545]
Timm23	chr16	4086	2630	68.9212	78.3682	-9.44705	0.879453	2.40203e-09	2.40203e-09	FDR<0.05	-0.142567	negligible	805.87	775.984	835.756	0.218983	0.490266	1.07703	0.623945	0.999945	Not Sig	nonsignificant	.	.	translocase of inner mitochondrial membrane 23 [Source:RGD Symbol;Acc:3863]
Cenpx	chr10	1174	828	91.1722	112.186	-21.0143	0.812684	2.47341e-09	2.47341e-09	FDR<0.05	-0.254454	small	94.7521	92.9296	96.5746	0.364064	0.155069	1.03922	0.876767	0.999945	Not Sig	nonsignificant	.	.
Atp5f1b	chr7	26815	16870	94.9313	99.6874	-4.75617	0.952289	2.48839e-09	2.48839e-09	FDR<0.05	-0.056953	negligible	5207.47	5013.85	5401.08	0.197198	0.544398	1.07723	0.586167	0.999945	Not Sig	nonsignificant	.	.	ATP synthase F1 subunit beta [Source:RGD Symbol;Acc:621368]
Tma7	chr8	7485	4959	83.6275	91.3978	-7.77021	0.914985	2.52093e-09	2.52093e-09	FDR<0.05	-0.113442	negligible	983.593	949.611	1017.57	0.217211	0.465658	1.07157	0.64146	0.999945	Not Sig	nonsignificant	.	Y	translation machinery associated 7 homolog [Source:RGD Symbol;Acc:1584795]
Rpl19	chr10	34404	21849	65.6642	68.5085	-2.84433	0.958482	2.57572e-09	2.57572e-09	FDR<0.05	-0.0516692	negligible	6691.91	6561.46	6822.36	0.196465	0.286694	1.03976	0.774347	0.999945	Not Sig	nonsignificant	.	.	ribosomal protein L19 [Source:RGD Symbol;Acc:621183]
Spag7	chr10	2087	1426	105.133	120.707	-15.574	0.870977	2.62318e-09	2.62318e-09	FDR<0.05	-0.206641	small	421.154	425.214	417.093	0.240502	-0.119419	0.980902	0.904943	0.999945	Not Sig	nonsignificant	.	.	sperm associated antigen 7 [Source:RGD Symbol;Acc:1305473]
Rpl5	chr14	10588	6906	69.7972	75.1598	-5.36259	0.928651	2.62892e-09	2.62892e-09	FDR<0.05	-0.0904299	negligible	2030.97	1975.59	2086.36	0.202685	0.386826	1.05607	0.698885	0.999945	Not Sig	nonsignificant	.	.	ribosomal protein L5 [Source:RGD Symbol;Acc:619825]
Rpl15	chr15	14521	9167	76.0716	81.2454	-5.17384	0.936318	2.68366e-09	2.68366e-09	FDR<0.05	-0.0757255	negligible	79.8501	78.1885	81.5117	0.393517	0.119703	1.0425	0.904718	0.999945	Not Sig	nonsignificant	.	.	ribosomal protein L15 [Source:RGD Symbol;Acc:621181]
Idh3a	chr8	6310	4332	94.0022	102.317	-8.31429	0.91874	2.73994e-09	2.73994e-09	FDR<0.05	-0.125333	negligible	1244.46	1246.64	1242.28	0.242404	-0.0310969	0.996502	0.975192	0.999945	Not Sig	nonsignificant	.	Y	isocitrate dehydrogenase (NAD(+)) 3 catalytic subunit alpha [Source:RGD Symbol;Acc:70889]
Capza2	chr4	6796	4299	91.2267	100.187	-8.96076	0.91056	2.76754e-09	2.76754e-09	FDR<0.05	-0.131143	negligible	1294.5	1241.92	1347.08	0.219047	0.527712	1.08467	0.597699	0.999945	Not Sig	nonsignificant	.	Y	capping actin protein of muscle Z-line subunit alpha 2 [Source:RGD Symbol;Acc:1549770]
Slc66a2	chr18	1064	691	95.0091	118.36	-23.3512	0.802711	2.85465e-09	2.85465e-09	FDR<0.05	-0.25274	small	215.296	216.259	214.333	0.285897	-0.0364911	0.991097	0.970891	0.999945	Not Sig	nonsignificant	.	.	solute carrier family 66 member 2 [Source:RGD Symbol;Acc:1305223]
Ociad1	chr14	12032	8231	105.695	113.663	-7.96742	0.929903	2.98198e-09	2.98198e-09	FDR<0.05	-0.0882494	negligible	2348.5	2351.42	2345.58	0.20694	-0.0206246	0.997513	0.983545	0.999945	Not Sig	nonsignificant	.	.	OCIA domain containing 1 [Source:RGD Symbol;Acc:1359549]
Crem	chr17	717	277	127.246	98.1432	29.1027	1.29653	3.05457e-09	3.05457e-09	FDR<0.05	0.399383	small	74.9833	57.4233	92.5432	0.4639	1.47982	1.61159	0.138921	0.999945	Not Sig	nonsignificant	.	.	cAMP responsive element modulator [Source:RGD Symbol;Acc:2402]
Mdh2	chr12	12736	8655	93.6119	99.2312	-5.61929	0.943372	3.09524e-09	3.09524e-09	FDR<0.05	-0.0843997	negligible	2511.38	2514.56	2508.2	0.205385	-0.020982	0.997474	0.98326	0.999945	Not Sig	nonsignificant	.	.	malate dehydrogenase 2 [Source:RGD Symbol;Acc:619719]
Rapgefl1	chr10	905	637	72.8467	94.7615	-21.9149	0.768737	3.12495e-09	3.12495e-09	FDR<0.05	-0.325627	small	97.4223	98.271	96.5737	0.355604	-0.0625229	0.982729	0.950146	0.999945	Not Sig	nonsignificant	.	.	Rap guanine nucleotide exchange factor like 1 [Source:RGD Symbol;Acc:1563269]
Taf9	chr2	4308	2535	95.9468	107.674	-11.7275	0.891084	3.184e-09	3.184e-09	FDR<0.05	-0.135431	negligible	801.244	747.315	855.174	0.222288	0.867151	1.14433	0.385859	0.999945	Not Sig	nonsignificant	.	.	TATA-box binding protein associated factor 9 [Source:RGD Symbol;Acc:727861]
Sem1	chr4	7027	4679	98.6144	105.656	-7.04182	0.933352	3.33967e-09	3.33967e-09	FDR<0.05	-0.110194	negligible	60.2086	50.9554	69.4619	0.430952	1.04423	1.36319	0.296378	0.999945	Not Sig	nonsignificant	.	.	SEM1 26S proteasome subunit [Source:RGD Symbol;Acc:1590628]
Cwc15	chr8	3792	2450	70.6197	80.3781	-9.75839	0.878594	3.66099e-09	3.66099e-09	FDR<0.05	-0.13706	negligible	656.3	667.134	645.467	0.225425	-0.210635	0.967523	0.833172	0.999945	Not Sig	nonsignificant	Y	.	CWC15 spliceosome-associated protein [Source:RGD Symbol;Acc:1310669]
Atp5mc3	chr3	29285	19149	84.0145	87.6081	-3.5936	0.958981	3.86814e-09	3.86814e-09	FDR<0.05	-0.0610254	negligible	5507.16	5423.62	5590.69	0.197191	0.221141	1.0308	0.824982	0.999945	Not Sig	nonsignificant	.	.	ATP synthase membrane subunit c locus 3 [Source:RGD Symbol;Acc:620052]
Spryd3	chr7	3437	2229	91.6212	104.227	-12.6059	0.879054	3.96019e-09	3.96019e-09	FDR<0.05	-0.141459	negligible	608.413	599.266	617.56	0.229874	0.179468	1.03053	0.85757	0.999945	Not Sig	nonsignificant	.	.	SPRY domain containing 3 [Source:RGD Symbol;Acc:1561500]
U2af1l4	chr1	2422	1702	88.0792	100.562	-12.4833	0.875865	4.41459e-09	4.41459e-09	FDR<0.05	-0.18324	negligible	443.828	442.705	444.951	0.237487	0.0279427	1.00507	0.977708	0.999945	Not Sig	nonsignificant	.	.	U2 small nuclear RNA auxiliary factor 1-like 4 [Source:RGD Symbol;Acc:1305600]
LOC103691423	chr2	9827	5852	58.985	63.3065	-4.32146	0.931738	4.5731e-09	4.5731e-09	FDR<0.05	-0.109985	negligible	47.4182	49.201	45.6354	0.467948	-0.227542	0.927531	0.820002	0.999945	Not Sig	nonsignificant	.	.	60S ribosomal protein L36 pseudogene [Source:RGD Symbol;Acc:9314470]
Ube2v2	chr11	5240	3689	82.1472	91.6679	-9.5207	0.896139	4.67231e-09	4.67231e-09	FDR<0.05	-0.119257	negligible	1099.23	1096.96	1101.5	0.225292	0.0174414	1.00413	0.986084	0.999945	Not Sig	nonsignificant	.	Y	ubiquitin conjugating enzyme E2 V2 [Source:RGD Symbol;Acc:727838]
Ccdc142	chr4	1905	1118	70.9209	85.9238	-15.0029	0.825393	4.69177e-09	4.69177e-09	FDR<0.05	-0.180963	negligible	5.24903	6.41514	4.08291	1.31636	-0.483647	0.63645	0.628636	0.999945	Not Sig	nonsignificant	.	.	coiled-coil domain containing 142 [Source:RGD Symbol;Acc:1561779]
Usp14	chr18	4618	3254	100.283	111.233	-10.9504	0.901554	5.09826e-09	5.09826e-09	FDR<0.05	-0.127721	negligible	1004.02	1003.74	1004.3	0.23308	-0.00507139	1.00055	0.995954	0.999945	Not Sig	nonsignificant	.	Y	ubiquitin specific peptidase 14 [Source:RGD Symbol;Acc:1311825]
Ankrd46	chr7	4161	2750	104.862	114.322	-9.46016	0.91725	5.19124e-09	5.19124e-09	FDR<0.05	-0.144855	negligible	812.236	824.328	800.145	0.24564	-0.186992	0.970663	0.851667	0.999945	Not Sig	nonsignificant	.	.	ankyrin repeat domain 46 [Source:RGD Symbol;Acc:1309382]
Polr2i	chr1	1430	996	84.1524	98.7873	-14.6348	0.851855	5.34526e-09	5.34526e-09	FDR<0.05	-0.214963	small	101.599	90.4671	112.732	0.36278	0.912504	1.24611	0.361503	0.999945	Not Sig	nonsignificant	.	.	RNA polymerase II subunit I [Source:RGD Symbol;Acc:1309395]
Nptx2	chr12	707	77	163.318	111.405	51.9133	1.46599	6.24642e-09	6.24642e-09	FDR<0.05	0.632427	medium	10.0411	3.84908	16.2331	1.0812	1.9706	4.21738	0.0487697	0.999945	Not Sig	nonsignificant	.	.	neuronal pentraxin 2 [Source:RGD Symbol;Acc:1309447]
Got2	chr19	4894	3665	95.4174	103.567	-8.14994	0.921308	6.49999e-09	6.49999e-09	FDR<0.05	-0.116074	negligible	973.593	1004.93	942.257	0.24155	-0.396992	0.937636	0.691373	0.999945	Not Sig	nonsignificant	.	Y	glutamic-oxaloacetic transaminase 2 [Source:RGD Symbol;Acc:2722]
Fam163b	chr3	1650	702	82.4918	100.796	-18.3041	0.818404	6.5812e-09	6.5812e-09	FDR<0.05	-0.271624	small	28.832	20.3192	37.3448	0.594399	1.50232	1.83791	0.133014	0.999945	Not Sig	nonsignificant	.	.	family with sequence similarity 163, member B [Source:RGD Symbol;Acc:1597714]
Tuba4a	chr9	14845	8671	96.7972	93.5273	3.26991	1.03496	6.86587e-09	6.86587e-09	FDR<0.05	0.0915664	negligible	2593.26	2402.76	2783.76	0.217177	0.972608	1.15857	0.330748	0.999945	Not Sig	nonsignificant	.	.	tubulin, alpha 4A [Source:RGD Symbol;Acc:1359623]
Plk2	chr2	5791	592	108.12	91.4309	16.6887	1.18253	7.37807e-09	7.37807e-09	FDR<0.05	0.22669	small	685.244	179.679	1190.81	0.324657	8.41587	6.62744	3.89975e-17	7.55707e-14	FDR<0.05	upregulated	.	.	polo-like kinase 2 [Source:RGD Symbol;Acc:620760]
Rps24	chr16	22303	13971	55.4083	58.3316	-2.92336	0.949884	7.51866e-09	7.51866e-09	FDR<0.05	-0.0659844	negligible	2568.18	2398.75	2737.62	0.210313	0.909496	1.14127	0.363088	0.999945	Not Sig	nonsignificant	.	.	ribosomal protein S24 [Source:RGD Symbol;Acc:621040]
Snrnp27	chr4	2604	1631	86.2095	98.5476	-12.3381	0.874801	7.62209e-09	7.62209e-09	FDR<0.05	-0.168666	negligible	439.932	420.421	459.443	0.239807	0.542014	1.09282	0.587809	0.999945	Not Sig	nonsignificant	.	Y	small nuclear ribonucleoprotein U4/U6.U5 subunit 27 [Source:RGD Symbol;Acc:1310925]
Pcsk1	chr2	375	118	139.225	92.7932	46.4321	1.50038	7.73813e-09	7.73813e-09	FDR<0.05	0.602053	medium	44.7076	32.5999	56.8153	0.524518	1.54328	1.74281	0.122762	0.999945	Not Sig	nonsignificant	.	.	proprotein convertase subtilisin/kexin type 1 [Source:RGD Symbol;Acc:3272]
Trappc2l	chr19	3074	2071	83.2418	92.75	-9.50817	0.897486	7.78895e-09	7.78895e-09	FDR<0.05	-0.149691	negligible	552.793	558.808	546.778	0.229187	-0.136325	0.978473	0.891565	0.999945	Not Sig	nonsignificant	.	.	trafficking protein particle complex subunit 2L [Source:RGD Symbol;Acc:1304906]
Phf5a	chr7	1751	1212	80.6053	94.882	-14.2767	0.849532	7.89453e-09	7.89453e-09	FDR<0.05	-0.183658	negligible	352.842	366.168	339.515	0.248399	-0.44258	0.927213	0.658069	0.999945	Not Sig	nonsignificant	.	Y	PHD finger protein 5A [Source:RGD Symbol;Acc:621555]
Cry2	chr3	970	333	134.111	110.681	23.4301	1.21169	8.01383e-09	8.01383e-09	FDR<0.05	0.353996	small	152.314	96.4383	208.189	0.359234	3.09381	2.15878	0.00197603	0.290826	Not Sig	nonsignificant	.	.	cryptochrome circadian regulator 2 [Source:RGD Symbol;Acc:620935]
Ndel1	chr10	1034	465	115.482	93.7779	21.7045	1.23145	8.09218e-09	8.09218e-09	FDR<0.05	0.322147	small	126.762	85.5443	167.98	0.370731	2.67318	1.96366	0.00751361	0.848163	Not Sig	nonsignificant	.	Y	nudE neurodevelopment protein 1-like 1 [Source:RGD Symbol;Acc:621235]
Eno1	chr5	18144	12987	95.5032	100.036	-4.53232	0.954693	8.25084e-09	8.25084e-09	FDR<0.05	-0.063245	negligible	2868.61	2909.03	2828.19	0.236838	-0.176739	0.972211	0.859713	0.999945	Not Sig	nonsignificant	.	.	enolase 1 [Source:RGD Symbol;Acc:2553]
LOC288913	chr19	2507	1644	91.2254	102.56	-11.3347	0.889482	8.35619e-09	8.35619e-09	FDR<0.05	-0.192035	negligible	489.807	482.974	496.639	0.243184	0.180094	1.02829	0.857078	0.999945	Not Sig	nonsignificant	.	.	similar to LEYDIG CELL TUMOR 10 KD PROTEIN [Source:RGD Symbol;Acc:735128]
Gpm6a	chr16	14159	9046	101.693	108.566	-6.87243	0.936698	9.56082e-09	9.56082e-09	FDR<0.05	-0.0747508	negligible	2573.84	2514.3	2633.38	0.216174	0.304078	1.04736	0.761069	0.999945	Not Sig	nonsignificant	.	Y	glycoprotein m6a [Source:RGD Symbol;Acc:631368]
Pcna	chr3	1927	775	134.351	114.469	19.8825	1.17369	9.58495e-09	9.58495e-09	FDR<0.05	0.220571	small	307.604	235.504	379.704	0.299534	2.31598	1.6123	0.0205596	0.999945	Not Sig	nonsignificant	.	.	proliferating cell nuclear antigen [Source:RGD Symbol;Acc:3269]
Minar2	chr18	1485	1180	87.0207	102.535	-15.5143	0.848692	9.74208e-09	9.74208e-09	FDR<0.05	-0.217308	small	290.16	309.298	271.022	0.292	-0.680229	0.876249	0.496359	0.999945	Not Sig	nonsignificant	.	.	membrane integral NOTCH2 associated receptor 2 [Source:RGD Symbol;Acc:1312005]
Psmb1	chr1	10491	7018	78.4646	84.0898	-5.6252	0.933105	9.91451e-09	9.91451e-09	FDR<0.05	-0.0843419	negligible	2070.87	2030.11	2111.63	0.207449	0.269783	1.04015	0.787327	0.999945	Not Sig	nonsignificant	.	.	proteasome 20S subunit beta 1 [Source:RGD Symbol;Acc:621092]
Snrpel1	chr8	4981	3320	74.5582	83.1313	-8.57305	0.896873	1.05062e-08	1.05062e-08	FDR<0.05	-0.126629	negligible	561.807	556.92	566.693	0.236331	0.113545	1.01755	0.909599	0.999945	Not Sig	nonsignificant	.	Y	small nuclear ribonucleoprotein polypeptide E like1 [Source:RGD Symbol;Acc:1592561]
Mt3	chr19	64430	40348	85.4446	87.3064	-1.86183	0.978675	1.05598e-08	1.05598e-08	FDR<0.05	-0.0369204	negligible	10568.1	10202.3	10934	0.198025	0.505378	1.07172	0.613293	0.999945	Not Sig	nonsignificant	.	.	metallothionein 3 [Source:RGD Symbol;Acc:621252]
Rpl35al1	chr11	7997	4905	60.215	65.4529	-5.23789	0.919975	1.08664e-08	1.08664e-08	FDR<0.05	-0.105449	negligible	31.098	29.4314	32.7645	0.587556	0.286797	1.11325	0.774268	0.999945	Not Sig	nonsignificant	.	.
Uqcr11	chr7	30073	19473	109.922	113.131	-3.20964	0.971629	1.16395e-08	1.16395e-08	FDR<0.05	-0.0529957	negligible	4764.92	4679.24	4850.59	0.19823	0.261709	1.03662	0.793546	0.999945	Not Sig	nonsignificant	.	.	ubiquinol-cytochrome c reductase, complex III subunit XI [Source:RGD Symbol;Acc:1590985]
Mpc1	chr1	10296	6860	83.6216	89.9372	-6.3156	0.929778	1.28739e-08	1.28739e-08	FDR<0.05	-0.0901055	negligible	2075.63	2076.85	2074.41	0.204224	-0.0110328	0.998826	0.991197	0.999945	Not Sig	nonsignificant	.	.	mitochondrial pyruvate carrier 1 [Source:RGD Symbol;Acc:620902]
Atp5pf	chr11	17471	11808	82.3846	87.0892	-4.7046	0.94598	1.38502e-08	1.38502e-08	FDR<0.05	-0.0756494	negligible	3172.85	3148.95	3196.75	0.197934	0.11006	1.01518	0.912362	0.999945	Not Sig	nonsignificant	.	.	ATP synthase peripheral stalk subunit F6 [Source:RGD Symbol;Acc:621376]
B4galt3	chr13	1125	781	84.9624	107.435	-22.4725	0.790827	1.45495e-08	1.45495e-08	FDR<0.05	-0.240094	small	227.601	230.636	224.566	0.285669	-0.151066	0.973679	0.879924	0.999945	Not Sig	nonsignificant	.	.	beta-1,4-galactosyltransferase 3 [Source:RGD Symbol;Acc:1359221]
LOC120093072	chr5	31381	18084	58.5253	60.8036	-2.27828	0.96253	1.45966e-08	1.45966e-08	FDR<0.05	-0.0586368	negligible	6555.32	6237.73	6872.91	0.21233	0.660833	1.10183	0.508719	0.999945	Not Sig	nonsignificant	.	.
Dusp6	chr7	1047	208	111.055	83.3767	27.6779	1.33196	1.46404e-08	1.46404e-08	FDR<0.05	0.353334	small	122.953	53.6525	192.254	0.364752	5.05097	3.58332	4.39581e-07	0.000212959	FDR<0.05	upregulated	.	Y	dual specificity phosphatase 6 [Source:RGD Symbol;Acc:70978]
Arhgdia	chr10	5940	3980	84.7267	92.3261	-7.59942	0.917689	1.46684e-08	1.46684e-08	FDR<0.05	-0.123307	negligible	956.132	964.622	947.642	0.218571	-0.121802	0.982397	0.903056	0.999945	Not Sig	nonsignificant	.	.	Rho GDP dissociation inhibitor alpha [Source:RGD Symbol;Acc:1359547]
Stoml2	chr5	2230	1464	87.5638	101.598	-14.0344	0.861863	1.50572e-08	1.50572e-08	FDR<0.05	-0.203308	small	429.581	426.261	432.901	0.238624	0.0946723	1.01558	0.924575	0.999945	Not Sig	nonsignificant	.	.	stomatin like 2 [Source:RGD Symbol;Acc:1308285]
Fbl	chr1	732	253	114.765	86.2774	28.4875	1.33019	1.54852e-08	1.54852e-08	FDR<0.05	0.402752	small	95.496	75.0708	115.921	0.417446	1.53359	1.54416	0.12513	0.999945	Not Sig	nonsignificant	.	.	fibrillarin [Source:RGD Symbol;Acc:1305542]
Uqcc2	chr20	5518	3854	82.1208	88.6133	-6.49251	0.926732	1.58491e-08	1.58491e-08	FDR<0.05	-0.11994	negligible	1020.25	1052.28	988.222	0.214356	-0.418848	0.939123	0.675327	0.999945	Not Sig	nonsignificant	.	.	ubiquinol-cytochrome c reductase complex assembly factor 2 [Source:RGD Symbol;Acc:1306917]
Rnf151	chr10	2145	1225	69.131	82.1928	-13.0618	0.841083	1.59245e-08	1.59245e-08	FDR<0.05	-0.212952	small	21.3623	13.6948	29.0298	0.694869	1.53081	2.11977	0.125816	0.999945	Not Sig	nonsignificant	.	.	ring finger protein 151 [Source:RGD Symbol;Acc:1309302]
Copz1	chr7	3492	2359	96.8933	108.755	-11.8621	0.890929	1.61592e-08	1.61592e-08	FDR<0.05	-0.135886	negligible	687.668	690.287	685.049	0.245648	-0.0578452	0.992412	0.953872	0.999945	Not Sig	nonsignificant	.	.	COPI coat complex subunit zeta 1 [Source:RGD Symbol;Acc:1306154]
Mrpl57	chr15	2960	2223	95.8508	108.49	-12.6391	0.883499	1.75195e-08	1.75195e-08	FDR<0.05	-0.157274	negligible	440.391	448.753	432.029	0.240765	-0.224604	0.962733	0.822287	0.999945	Not Sig	nonsignificant	.	.	mitochondrial ribosomal protein L57 [Source:RGD Symbol;Acc:1594654]
Eif3h	chr7	7197	4578	72.3441	78.7986	-6.45449	0.918089	1.78418e-08	1.78418e-08	FDR<0.05	-0.104209	negligible	1377.51	1333.96	1421.07	0.212836	0.423141	1.0653	0.672193	0.999945	Not Sig	nonsignificant	.	.	eukaryotic translation initiation factor 3, subunit H [Source:RGD Symbol;Acc:735178]
Dpm2	chr3	2568	1972	95.2481	105.957	-10.7093	0.898928	1.80542e-08	1.80542e-08	FDR<0.05	-0.1558	negligible	546.181	582.481	509.881	0.233118	-0.832255	0.87536	0.405265	0.999945	Not Sig	nonsignificant	.	.	dolichyl-phosphate mannosyltransferase subunit 2, regulatory [Source:RGD Symbol;Acc:2514]
Cep19	chr11	2082	1362	82.0158	93.9621	-11.9463	0.87286	1.81466e-08	1.81466e-08	FDR<0.05	-0.177803	negligible	415.328	400.89	429.766	0.244625	0.400975	1.07203	0.688438	0.999945	Not Sig	nonsignificant	.	.	centrosomal protein 19 [Source:RGD Symbol;Acc:621352]
Pex11b	chr2	1564	1198	84.7257	98.5276	-13.8019	0.859918	1.82349e-08	1.82349e-08	FDR<0.05	-0.21469	small	313.119	341.97	284.268	0.263529	-0.996918	0.831267	0.318804	0.999945	Not Sig	nonsignificant	.	.	peroxisomal biogenesis factor 11 beta [Source:RGD Symbol;Acc:1310353]
Btbd10	chr1	1449	655	131.942	109.612	22.3303	1.20372	1.991e-08	1.991e-08	FDR<0.05	0.224509	small	238.642	194.58	282.705	0.305725	1.74477	1.45289	0.0810252	0.999945	Not Sig	nonsignificant	.	.	BTB domain containing 10 [Source:RGD Symbol;Acc:1306301]
LOC100365839	chr11	15564	9683	63.306	66.9948	-3.68878	0.944939	2.07499e-08	2.07499e-08	FDR<0.05	-0.0897945	negligible	3041.12	2997.6	3084.64	0.199367	0.207748	1.02904	0.835426	0.999945	Not Sig	nonsignificant	.	.	40S ribosomal protein S3a-like [Source:RGD Symbol;Acc:2318248]
Denr	chr12	2635	1666	98.2108	110.491	-12.2802	0.888858	2.19882e-08	2.19882e-08	FDR<0.05	-0.150553	negligible	496.675	487.875	505.474	0.23651	0.206807	1.03607	0.83616	0.999945	Not Sig	nonsignificant	.	.	density regulated reinitiation and release factor [Source:RGD Symbol;Acc:1584200]
Cops8	chr9	2448	1679	87.0812	100.99	-13.9092	0.862272	2.35094e-08	2.35094e-08	FDR<0.05	-0.161217	negligible	503.588	487.011	520.165	0.233778	0.39949	1.06808	0.689532	0.999945	Not Sig	nonsignificant	.	.	COP9 signalosome subunit 8 [Source:RGD Symbol;Acc:1311404]
Manbal	chr3	3568	2275	93.9872	104.16	-10.1731	0.902332	2.44275e-08	2.44275e-08	FDR<0.05	-0.151413	negligible	696.952	693.686	700.218	0.221966	0.0596757	1.00942	0.952414	0.999945	Not Sig	nonsignificant	.	.	mannosidase beta like [Source:RGD Symbol;Acc:1561447]
Dnajc19	chr2	4764	3052	96.9335	107.27	-10.3363	0.903642	2.454e-08	2.454e-08	FDR<0.05	-0.127844	negligible	711.162	694.521	727.803	0.223617	0.308557	1.04792	0.757658	0.999945	Not Sig	nonsignificant	Y	Y	DnaJ heat shock protein family (Hsp40) member C19 [Source:RGD Symbol;Acc:1560220]
Atp5pd	chr10	23681	15023	73.7653	76.7827	-3.01737	0.960702	2.52734e-08	2.52734e-08	FDR<0.05	-0.0682822	negligible	4329.22	4222.83	4435.61	0.196893	0.360311	1.05039	0.718615	0.999945	Not Sig	nonsignificant	.	.	ATP synthase peripheral stalk subunit d [Source:RGD Symbol;Acc:620083]
Atp6v1d	chr6	12460	8210	93.5651	99.0234	-5.45832	0.944878	2.54066e-08	2.54066e-08	FDR<0.05	-0.0846091	negligible	2547.6	2507.28	2587.92	0.215729	0.20693	1.03216	0.836065	0.999945	Not Sig	nonsignificant	.	.	ATPase H+ transporting V1 subunit D [Source:RGD Symbol;Acc:735119]
LOC690468	chr2	18532	11023	69.1269	72.5767	-3.4498	0.952467	2.57743e-08	2.57743e-08	FDR<0.05	-0.0736083	negligible	153.835	141.135	166.535	0.317527	0.76821	1.17997	0.442363	0.999945	Not Sig	nonsignificant	.	.
Gabrd	chr5	856	317	85.2113	108.613	-23.4013	0.784543	2.83399e-08	2.83399e-08	FDR<0.05	-0.374108	small	126.321	90.9111	161.73	0.397115	2.15729	1.77899	0.030983	0.999945	Not Sig	nonsignificant	.	.	gamma-aminobutyric acid type A receptor subunit delta [Source:RGD Symbol;Acc:61901]
Dpy30	chr6	2395	1656	87.2531	100.373	-13.1198	0.86929	2.88875e-08	2.88875e-08	FDR<0.05	-0.188848	negligible	473.501	486.59	460.411	0.236311	-0.338122	0.946199	0.735271	0.999945	Not Sig	nonsignificant	Y	.	dpy-30 histone methyltransferase complex regulatory subunit [Source:RGD Symbol;Acc:708575]
Shisa4	chr13	1464	1028	102.506	116.422	-13.9158	0.880471	2.96252e-08	2.96252e-08	FDR<0.05	-0.227335	small	6.2483	3.50877	8.98782	1.2411	1.08656	2.56153	0.277231	0.999945	Not Sig	nonsignificant	.	.	shisa family member 4 [Source:RGD Symbol;Acc:1312041]
Gm5471	chr5	11772	3098	109.355	103.172	6.18273	1.05993	3.17865e-08	3.17865e-08	FDR<0.05	0.11408	negligible	1817.43	1114.07	2520.8	0.918176	1.28366	2.2627	0.199262	0.999945	Not Sig	nonsignificant	.	.	predicted pseudogene 5471 [Source:RGD Symbol;Acc:1560994]
Fscn1	chr12	1106	449	129.914	107.399	22.5152	1.20964	3.19816e-08	3.19816e-08	FDR<0.05	0.299549	small	109.25	84.1302	134.37	0.406714	1.70344	1.59716	0.0884849	0.999945	Not Sig	nonsignificant	.	Y	fascin actin-bundling protein 1 [Source:RGD Symbol;Acc:1583309]
Vps25	chr10	3052	2053	94.465	106.742	-12.2774	0.884981	3.29989e-08	3.29989e-08	FDR<0.05	-0.155564	negligible	605.005	596.935	613.076	0.231486	0.158862	1.02704	0.873778	0.999945	Not Sig	nonsignificant	.	.	vacuolar protein sorting 25 homolog [Source:RGD Symbol;Acc:1584685]
Tubb5	chr20	14640	10532	81.0876	84.983	-3.89546	0.954162	3.52743e-08	3.52743e-08	FDR<0.05	-0.0659407	negligible	2593.33	2697.41	2489.25	0.218445	-0.534858	0.922828	0.592748	0.999945	Not Sig	nonsignificant	.	.	tubulin, beta 5 class I [Source:RGD Symbol;Acc:628596]
LOC100911266	chr3	1535	1160	107.795	130.761	-22.9655	0.82437	3.67217e-08	3.67217e-08	FDR<0.05	-0.212429	small	311.576	328.254	294.898	0.267576	-0.596084	0.898385	0.551119	0.999945	Not Sig	nonsignificant	.	.
Polr2l	chr1	7533	4828	83.6793	89.6035	-5.92426	0.933884	3.88024e-08	3.88024e-08	FDR<0.05	-0.0945644	negligible	1143.58	1120.67	1166.48	0.219992	0.271149	1.04088	0.786277	0.999945	Not Sig	nonsignificant	.	.
Tubb2a	chr17	44390	30950	96.8076	99.6335	-2.82595	0.971637	3.88673e-08	3.88673e-08	FDR<0.05	-0.0411742	negligible	8003.69	8073.28	7934.1	0.225969	-0.112836	0.982761	0.910161	0.999945	Not Sig	nonsignificant	.	.	tubulin, beta 2A class IIa [Source:RGD Symbol;Acc:1588452]
Npm1	chr10	7673	5191	76.7267	84.5119	-7.78519	0.907881	3.97355e-08	3.97355e-08	FDR<0.05	-0.0855638	negligible	1510.27	1501.05	1519.48	0.21566	0.0755416	1.01228	0.939784	0.999945	Not Sig	nonsignificant	.	.	nucleophosmin 1 [Source:RGD Symbol;Acc:3192]
Hypk	chr3	6005	4104	73.1414	79.9343	-6.79289	0.915019	4.23398e-08	4.23398e-08	FDR<0.05	-0.11133	negligible	838.651	843.542	833.76	0.218452	-0.0808259	0.988404	0.93558	0.999945	Not Sig	nonsignificant	.	.	Huntingtin interacting protein K [Source:RGD Symbol;Acc:1311457]
Smim29	chr20	2657	1680	107.602	124.914	-17.3113	0.861414	4.30756e-08	4.30756e-08	FDR<0.05	-0.178234	negligible	483.174	470.905	495.443	0.235418	0.31841	1.05211	0.750174	0.999945	Not Sig	nonsignificant	.	Y	small integral membrane protein 29 [Source:RGD Symbol;Acc:1564450]
Polr2a	chr10	725	204	147.044	109.366	37.678	1.34451	4.37105e-08	4.37105e-08	FDR<0.05	0.395389	small	67.6886	35.6901	99.6872	0.44167	3.32024	2.79313	0.000899389	0.151554	Not Sig	nonsignificant	.	.	RNA polymerase II subunit A [Source:RGD Symbol;Acc:1587326]
Arl16	chr10	1009	755	87.4719	106.929	-19.4568	0.81804	4.39011e-08	4.39011e-08	FDR<0.05	-0.223879	small	176.497	187.482	165.511	0.302169	-0.598289	0.882809	0.549647	0.999945	Not Sig	nonsignificant	.	Y	ADP-ribosylation factor like GTPase 16 [Source:RGD Symbol;Acc:1590059]
Eif2s1	chr6	2007	1355	75.6275	89.3317	-13.7042	0.846592	4.40215e-08	4.40215e-08	FDR<0.05	-0.173661	negligible	408.047	400	416.093	0.256588	0.208221	1.04023	0.835056	0.999945	Not Sig	nonsignificant	.	.	eukaryotic translation initiation factor 2 subunit alpha [Source:RGD Symbol;Acc:620963]
Mrps7	chr10	2216	1523	85.2911	97.0999	-11.8088	0.878385	4.40274e-08	4.40274e-08	FDR<0.05	-0.165337	negligible	442.253	433.855	450.651	0.24174	0.221258	1.03871	0.824891	0.999945	Not Sig	nonsignificant	.	.	mitochondrial ribosomal protein S7 [Source:RGD Symbol;Acc:1309164]
Nedd8	chr15	10984	7427	98.0123	103.52	-5.50728	0.9468	4.41623e-08	4.41623e-08	FDR<0.05	-0.0909971	negligible	1907.32	1880.95	1933.69	0.203025	0.196376	1.02804	0.844316	0.999945	Not Sig	nonsignificant	.	.	NEDD8 ubiquitin like modifier [Source:RGD Symbol;Acc:3158]
Emc7	chr3	5158	3560	89.8164	98.337	-8.52054	0.913354	4.41696e-08	4.41696e-08	FDR<0.05	-0.127387	negligible	1082.76	1097.66	1067.86	0.21315	-0.187807	0.972849	0.851028	0.999945	Not Sig	nonsignificant	.	Y	ER membrane protein complex subunit 7 [Source:RGD Symbol;Acc:1305045]
Ndufa6	chr7	16171	10350	89.4143	93.8435	-4.42925	0.952802	4.47787e-08	4.47787e-08	FDR<0.05	-0.0682904	negligible	3094.43	3012.6	3176.26	0.198423	0.385255	1.05432	0.700048	0.999945	Not Sig	nonsignificant	.	.	NADH:ubiquinone oxidoreductase subunit A6 [Source:RGD Symbol;Acc:1309818]
Gstp1	chr1	5385	3341	103.274	95.2722	8.00187	1.08399	4.51655e-08	4.51655e-08	FDR<0.05	0.153065	negligible	960.967	909.587	1012.35	0.231986	0.65361	1.11297	0.513363	0.999945	Not Sig	nonsignificant	.	.	glutathione S-transferase pi 1 [Source:RGD Symbol;Acc:2758]
Cdip1	chr10	8465	5616	98.6876	105.612	-6.92449	0.934435	4.71022e-08	4.71022e-08	FDR<0.05	-0.0882264	negligible	1358.39	1325.56	1391.21	0.223577	0.304246	1.04953	0.76094	0.999945	Not Sig	nonsignificant	.	.	cell death-inducing p53 target 1 [Source:RGD Symbol;Acc:1310686]
Ap1m1	chr16	2434	1482	99.5743	116.081	-16.5067	0.857801	5.29661e-08	5.29661e-08	FDR<0.05	-0.159732	negligible	462.827	421.6	504.054	0.238428	1.08049	1.19558	0.279925	0.999945	Not Sig	nonsignificant	.	.	adaptor related protein complex 1 subunit mu 1 [Source:RGD Symbol;Acc:1307653]
Bloc1s2	chr1	1408	883	86.7456	104.737	-17.9917	0.828221	5.55873e-08	5.55873e-08	FDR<0.05	-0.230058	small	274.49	263.365	285.615	0.265008	0.452627	1.08448	0.650817	0.999945	Not Sig	nonsignificant	.	.	biogenesis of lysosomal organelles complex-1, subunit 2 [Source:RGD Symbol;Acc:1306551]
Ywhab	chr3	7573	4680	97.0423	104.498	-7.45525	0.928656	5.6059e-08	5.6059e-08	FDR<0.05	-0.0950977	negligible	1232.74	1175.57	1289.92	0.219472	0.602092	1.09727	0.547113	0.999945	Not Sig	nonsignificant	.	.	tyrosine 3-monooxygenase/tryptophan 5-monooxygenase activation protein, beta [Source:RGD Symbol;Acc:61998]
Matr3	chr18	5941	3952	109.931	120.237	-10.3063	0.914283	5.61726e-08	5.61726e-08	FDR<0.05	-0.107346	negligible	745.172	692.984	797.36	0.234858	0.848027	1.15062	0.396423	0.999945	Not Sig	nonsignificant	.	Y	matrin 3 [Source:RGD Symbol;Acc:3052]
LOC102552093	chr15	710	388	89.9337	113.742	-23.8085	0.79068	5.64697e-08	5.64697e-08	FDR<0.05	-0.302517	small	18.1372	14.1661	22.1083	0.730891	0.847922	1.56065	0.396482	0.999945	Not Sig	nonsignificant	.	.
Dnal4	chr7	1052	706	77.1414	94.5102	-17.3688	0.816223	5.74685e-08	5.74685e-08	FDR<0.05	-0.245856	small	211.411	198.977	223.846	0.281343	0.616339	1.12498	0.537671	0.999945	Not Sig	nonsignificant	.	.	dynein, axonemal, light chain 4 [Source:RGD Symbol;Acc:1309099]
Trappc3	chr5	3446	2134	86.0075	96.9197	-10.9122	0.88741	5.99091e-08	5.99091e-08	FDR<0.05	-0.140911	negligible	640.922	618.275	663.569	0.225058	0.448533	1.07326	0.653769	0.999945	Not Sig	nonsignificant	.	.	trafficking protein particle complex subunit 3 [Source:RGD Symbol;Acc:1309135]
Dnajb11	chr11	1444	638	105.902	89.919	15.9828	1.17775	6.06282e-08	6.06282e-08	FDR<0.05	0.249979	small	242.561	196.491	288.631	0.316952	1.74292	1.46893	0.0813476	0.999945	Not Sig	nonsignificant	Y	.	DnaJ heat shock protein family (Hsp40) member B11 [Source:RGD Symbol;Acc:1307373]
Mrps17	chr12	1854	1358	80.4124	91.5773	-11.1649	0.878082	6.47031e-08	6.47031e-08	FDR<0.05	-0.197732	negligible	378.464	387.14	369.788	0.247259	-0.262823	0.955178	0.792687	0.999945	Not Sig	nonsignificant	.	.	mitochondrial ribosomal protein S17 [Source:RGD Symbol;Acc:1307650]
Lamtor2	chr2	7433	4880	71.1067	76.9029	-5.79625	0.924629	6.55588e-08	6.55588e-08	FDR<0.05	-0.112173	negligible	1287.09	1270.45	1303.74	0.214199	0.180208	1.0262	0.856989	0.999945	Not Sig	nonsignificant	.	.	late endosomal/lysosomal adaptor, MAPK and MTOR activator 2 [Source:RGD Symbol;Acc:1562501]
Sirt5	chr17	3335	2131	85.3525	96.2887	-10.9362	0.886423	6.75877e-08	6.75877e-08	FDR<0.05	-0.136987	negligible	670.386	660.746	680.026	0.223224	0.183941	1.02918	0.85406	0.999945	Not Sig	nonsignificant	.	.	sirtuin 5 [Source:RGD Symbol;Acc:1303285]
Psmg3	chr12	1253	983	94.8063	111.058	-16.2521	0.853662	6.87127e-08	6.87127e-08	FDR<0.05	-0.245475	small	254.919	270.357	239.48	0.265908	-0.657921	0.885792	0.510589	0.999945	Not Sig	nonsignificant	.	.	proteasome assembly chaperone 3 [Source:RGD Symbol;Acc:2319950]
Zfand2b	chr9	895	537	96.3856	125.532	-29.1465	0.767816	7.13367e-08	7.13367e-08	FDR<0.05	-0.255698	small	165.398	151.714	179.081	0.299343	0.800291	1.18038	0.423542	0.999945	Not Sig	nonsignificant	.	.	zinc finger AN1-type containing 2B [Source:RGD Symbol;Acc:1306260]
Esd	chr15	3761	2659	74.554	83.6304	-9.07635	0.891471	7.87463e-08	7.87463e-08	FDR<0.05	-0.137777	negligible	758.665	783.083	734.247	0.22606	-0.418972	0.937636	0.675237	0.999945	Not Sig	nonsignificant	.	.	esterase D [Source:RGD Symbol;Acc:1592114]
Stx7	chr1	4155	2802	82.0281	90.2926	-8.26448	0.90847	7.88292e-08	7.88292e-08	FDR<0.05	-0.135185	negligible	738.463	720.82	756.106	0.240052	0.272685	1.04895	0.785095	0.999945	Not Sig	nonsignificant	Y	.	syntaxin 7 [Source:RGD Symbol;Acc:619747]
Rpl26	chr10	30567	19167	60.9508	63.2456	-2.29481	0.963716	8.11374e-08	8.11374e-08	FDR<0.05	-0.0549488	negligible	1004.21	939.323	1069.09	0.214575	0.872168	1.13815	0.383116	0.999945	Not Sig	nonsignificant	.	.	ribosomal protein L26 [Source:RGD Symbol;Acc:1310607]
Tomm6	chr9	8009	4986	91.1404	97.3673	-6.22684	0.936048	8.26416e-08	8.26416e-08	FDR<0.05	-0.0952941	negligible	825.795	777.84	873.75	0.225425	0.752408	1.1233	0.451805	0.999945	Not Sig	nonsignificant	.	.
Sgta	chr7	4788	3070	91.8465	99.5769	-7.73035	0.922368	8.61868e-08	8.61868e-08	FDR<0.05	-0.134521	negligible	964.726	934.062	995.391	0.213662	0.427624	1.06566	0.668925	0.999945	Not Sig	nonsignificant	.	Y	small glutamine rich tetratricopeptide repeat co-chaperone alpha [Source:RGD Symbol;Acc:620815]
Hspe1	chr9	12388	8280	83.6707	88.2213	-4.55059	0.948419	8.76285e-08	8.76285e-08	FDR<0.05	-0.0786747	negligible	1073.47	1036.47	1110.46	0.211211	0.470808	1.07139	0.637778	0.999945	Not Sig	nonsignificant	.	.	heat shock protein family E (Hsp10) member 1 [Source:RGD Symbol;Acc:2844]
Cops9	chr9	13742	9246	97.2653	101.835	-4.56941	0.955129	9.57862e-08	9.57862e-08	FDR<0.05	-0.084977	negligible	2431.27	2452.48	2410.07	0.202899	-0.121653	0.982707	0.903174	0.999945	Not Sig	nonsignificant	.	.	COP9 signalosome subunit 9 [Source:RGD Symbol;Acc:1596701]
Btf3	chr2	8473	5606	84.8085	91.1429	-6.33438	0.930501	9.90036e-08	9.90036e-08	FDR<0.05	-0.0847404	negligible	1460.53	1423.09	1497.98	0.206886	0.355418	1.05262	0.722276	0.999945	Not Sig	nonsignificant	.	.	basic transcription factor 3 [Source:RGD Symbol;Acc:1308095]
Atp6ap1	chrX	7237	5031	112.672	120.485	-7.81292	0.935154	1.00797e-07	1.00797e-07	FDR<0.05	-0.0933984	negligible	1471.51	1501.91	1441.11	0.218155	-0.279621	0.959516	0.779768	0.999945	Not Sig	nonsignificant	.	.	ATPase H+ transporting accessory protein 1 [Source:RGD Symbol;Acc:620423]
Pdcd5	chr1	2620	1703	79.7838	91.6509	-11.8671	0.870519	1.00844e-07	1.00844e-07	FDR<0.05	-0.168956	negligible	386.862	366.115	407.608	0.244902	0.632283	1.11333	0.527202	0.999945	Not Sig	nonsignificant	.	.	programmed cell death 5 [Source:RGD Symbol;Acc:1310561]
Polr2k	chr7	4526	3010	86.7682	95.9922	-9.22395	0.903909	1.01481e-07	1.01481e-07	FDR<0.05	-0.132416	negligible	820.022	822.615	817.43	0.223071	-0.0321906	0.993698	0.97432	0.999945	Not Sig	nonsignificant	.	.	RNA polymerase II, I and III subunit K [Source:RGD Symbol;Acc:2319895]
Pebp1	chr12	37093	21625	98.0517	101.2	-3.14817	0.968892	1.03126e-07	1.03126e-07	FDR<0.05	-0.0395459	negligible	7176.88	6933.64	7420.13	0.264099	0.372333	1.07016	0.709645	0.999945	Not Sig	nonsignificant	.	.	phosphatidylethanolamine binding protein 1 [Source:RGD Symbol;Acc:62017]
Apbb1	chr1	7247	5164	100.145	107.718	-7.57237	0.929702	1.05849e-07	1.05849e-07	FDR<0.05	-0.11025	negligible	1597.39	1640.48	1554.29	0.217288	-0.364501	0.947458	0.715484	0.999945	Not Sig	nonsignificant	.	.	amyloid beta precursor protein binding family B member 1 [Source:RGD Symbol;Acc:2122]
Ndufs3	chr3	7102	4617	81.8246	87.8866	-6.06199	0.931025	1.10438e-07	1.10438e-07	FDR<0.05	-0.110489	negligible	1290.97	1310.86	1271.07	0.208718	-0.21142	0.96965	0.83256	0.999945	Not Sig	nonsignificant	.	.	NADH:ubiquinone oxidoreductase core subunit S3 [Source:RGD Symbol;Acc:1309406]
LOC108350501	chr3	53155	31896	69.3882	71.2002	-1.81202	0.97455	1.10455e-07	1.10455e-07	FDR<0.05	-0.0391408	negligible	10307	10001.1	10612.9	0.21686	0.396397	1.06118	0.691813	0.999945	Not Sig	nonsignificant	.	.
Mrpl36	chr1	1521	1128	92.4033	107.285	-14.8817	0.861288	1.1434e-07	1.1434e-07	FDR<0.05	-0.231048	small	288.649	302.564	274.733	0.259452	-0.532869	0.908018	0.594124	0.999945	Not Sig	nonsignificant	.	.	mitochondrial ribosomal protein L36 [Source:RGD Symbol;Acc:1306375]
Mrpl35	chr4	2169	1547	81.2058	91.7711	-10.5653	0.884873	1.18122e-07	1.18122e-07	FDR<0.05	-0.172228	negligible	76.6074	70.3593	82.8555	0.403603	0.542955	1.17761	0.587161	0.999945	Not Sig	nonsignificant	.	.	mitochondrial ribosomal protein L35 [Source:RGD Symbol;Acc:1307065]
Gps1	chr10	3214	2114	99.7948	112.276	-12.4809	0.888837	1.22077e-07	1.22077e-07	FDR<0.05	-0.142935	negligible	636.557	642.735	630.38	0.236346	-0.131883	0.980777	0.895077	0.999945	Not Sig	nonsignificant	.	.	G protein pathway suppressor 1 [Source:RGD Symbol;Acc:621532]
Dmtn	chr15	1381	824	98.982	119.47	-20.4884	0.828506	1.27315e-07	1.27315e-07	FDR<0.05	-0.235353	small	249.098	246.815	251.382	0.282374	0.120723	1.0185	0.903911	0.999945	Not Sig	nonsignificant	.	.	dematin actin binding protein [Source:RGD Symbol;Acc:1311419]
Clns1a	chr1	2171	1624	93.3647	106.942	-13.5769	0.873044	1.36127e-07	1.36127e-07	FDR<0.05	-0.171633	negligible	482.09	518.459	445.722	0.238579	-0.921633	0.859705	0.35672	0.999945	Not Sig	nonsignificant	.	Y	chloride nucleotide-sensitive channel 1A [Source:RGD Symbol;Acc:61884]
Ahsa1	chr6	5009	3417	95.6587	107.016	-11.357	0.893875	1.45466e-07	1.45466e-07	FDR<0.05	-0.110786	negligible	1013.93	1015.5	1012.37	0.2201	-0.028325	0.996915	0.977403	0.999945	Not Sig	nonsignificant	.	.	activator of Hsp90 ATPase activity 1 [Source:RGD Symbol;Acc:1589285]
Klf10	chr7	424	249	121.172	93.141	28.0306	1.30095	1.48992e-07	1.48992e-07	FDR<0.05	0.383097	small	79.2332	72.3229	86.1435	0.412232	0.589726	1.1911	0.555375	0.999945	Not Sig	nonsignificant	.	.	KLF transcription factor 10 [Source:RGD Symbol;Acc:621652]
Atp5f1e	chr3	23127	14356	85.444	88.2498	-2.80585	0.968206	1.6998e-07	1.6998e-07	FDR<0.05	-0.0608684	negligible	3638.31	3480.12	3796.49	0.199534	0.630476	1.09091	0.528383	0.999945	Not Sig	nonsignificant	.	.	ATP synthase F1 subunit epsilon [Source:RGD Symbol;Acc:621374]
Gabarap	chr10	12524	7971	80.7716	85.4219	-4.65027	0.945561	1.7115e-07	1.7115e-07	FDR<0.05	-0.0708182	negligible	2423.95	2350.29	2497.61	0.201751	0.433952	1.06268	0.664324	0.999945	Not Sig	nonsignificant	.	.	GABA type A receptor-associated protein [Source:RGD Symbol;Acc:61911]
Pfdn1	chr18	6532	4389	82.8317	89.1846	-6.35288	0.928767	1.73601e-07	1.73601e-07	FDR<0.05	-0.0992269	negligible	1296.21	1293.87	1298.56	0.208552	0.0229445	1.00362	0.981695	0.999945	Not Sig	nonsignificant	.	.	prefoldin subunit 1 [Source:RGD Symbol;Acc:1305603]
Tcea1	chr5	1902	1193	80.9741	97.1107	-16.1366	0.833833	1.76041e-07	1.76041e-07	FDR<0.05	-0.17728	negligible	286.739	284.629	288.849	0.262309	0.0694018	1.01483	0.94467	0.999945	Not Sig	nonsignificant	.	Y	transcription elongation factor A1 [Source:RGD Symbol;Acc:1309880]
Ddx24	chr6	1875	1469	83.25	97.3976	-14.1476	0.854744	1.76311e-07	1.76311e-07	FDR<0.05	-0.158862	negligible	429.278	455.956	402.6	0.247867	-0.734749	0.88298	0.462492	0.999945	Not Sig	nonsignificant	.	.	DEAD-box helicase 24 [Source:RGD Symbol;Acc:727929]
Ip6k2	chr8	3033	2343	88.8849	101.449	-12.5639	0.876156	1.77356e-07	1.77356e-07	FDR<0.05	-0.131723	negligible	694.725	739.431	650.018	0.242204	-0.771901	0.879079	0.440173	0.999945	Not Sig	nonsignificant	.	.	inositol hexakisphosphate kinase 2 [Source:RGD Symbol;Acc:620529]
Cct6a	chr12	4434	2990	92.5969	102.346	-9.74887	0.904746	1.80177e-07	1.80177e-07	FDR<0.05	-0.122723	negligible	884.068	877.66	890.476	0.215422	0.0959546	1.0146	0.923557	0.999945	Not Sig	nonsignificant	.	Y	chaperonin containing TCP1 subunit 6A [Source:RGD Symbol;Acc:1304763]
Myg1	chr7	1372	983	96.2623	111.948	-15.6857	0.859884	1.87533e-07	1.87533e-07	FDR<0.05	-0.215559	small	270.464	284.891	256.037	0.26543	-0.592097	0.898719	0.553785	0.999945	Not Sig	nonsignificant	.	.	MYG1 exonuclease [Source:RGD Symbol;Acc:1359237]
Mrpl16	chr1	1073	873	87.4805	105.099	-17.6183	0.832364	1.94059e-07	1.94059e-07	FDR<0.05	-0.226406	small	217.612	240.01	195.213	0.287175	-1.05516	0.813352	0.29135	0.999945	Not Sig	nonsignificant	.	.	mitochondrial ribosomal protein L16 [Source:RGD Symbol;Acc:735195]
Wdr83os	chr19	4379	2875	85.8586	93.4305	-7.57194	0.918957	1.94647e-07	1.94647e-07	FDR<0.05	-0.125358	negligible	833.779	808.402	859.157	0.21721	0.402476	1.06279	0.687334	0.999945	Not Sig	nonsignificant	.	.	WD repeat domain 83 opposite strand [Source:RGD Symbol;Acc:1564058]
Bmyc	chr3	890	347	88.6724	113.386	-24.7134	0.782042	2.02497e-07	2.02497e-07	FDR<0.05	-0.34209	small	94.0719	67.3178	120.826	1.10725	0.769858	1.79486	0.441384	0.999945	Not Sig	nonsignificant	.	.	brain expressed myelocytomatosis oncogene [Source:RGD Symbol;Acc:1584970]
Svbp	chr5	590	380	88.7897	111.428	-22.6386	0.796832	2.05796e-07	2.05796e-07	FDR<0.05	-0.336984	small	109.677	101.021	118.333	0.34406	0.652683	1.17137	0.51396	0.999945	Not Sig	nonsignificant	.	Y	small vasohibin binding protein [Source:RGD Symbol;Acc:1311232]
Ubl7	chr8	4671	3099	84.3268	92.1519	-7.82514	0.915084	2.06764e-07	2.06764e-07	FDR<0.05	-0.125219	negligible	941.226	931.105	951.346	0.21732	0.137668	1.02174	0.890503	0.999945	Not Sig	nonsignificant	.	.	ubiquitin-like 7 [Source:RGD Symbol;Acc:1303055]
Hmgn2	chr5	5039	2927	104.273	113.259	-8.98634	0.920657	2.09268e-07	2.09268e-07	FDR<0.05	-0.116896	negligible	779.137	741.891	816.382	0.219735	0.627584	1.10041	0.530276	0.999945	Not Sig	nonsignificant	.	.	high mobility group nucleosomal binding domain 2 [Source:RGD Symbol;Acc:620649]
Sumo1	chr9	6590	4326	88.2519	95.6894	-7.43753	0.922274	2.15115e-07	2.15115e-07	FDR<0.05	-0.100988	negligible	1291.11	1241.45	1340.78	0.211343	0.521232	1.08001	0.602205	0.999945	Not Sig	nonsignificant	.	Y	small ubiquitin-like modifier 1 [Source:RGD Symbol;Acc:1306919]
Mtx1	chr2	1619	1182	96.7249	112.544	-15.8186	0.859444	2.17629e-07	2.17629e-07	FDR<0.05	-0.172455	negligible	282.045	284.603	279.486	0.281075	-0.11135	0.98202	0.911339	0.999945	Not Sig	nonsignificant	.	.	Metaxin 1 [Source:RGD Symbol;Acc:1559791]
Atp5po	chr11	15082	10287	79.1593	82.9182	-3.7589	0.954667	2.1978e-07	2.1978e-07	FDR<0.05	-0.0715977	negligible	2773.71	2807.27	2740.15	0.200509	-0.175589	0.976089	0.860616	0.999945	Not Sig	nonsignificant	.	.	ATP synthase peripheral stalk subunit OSCP [Source:RGD Symbol;Acc:621379]
Fam131a	chr11	7490	4593	105.595	112.845	-7.25038	0.935749	2.19831e-07	2.19831e-07	FDR<0.05	-0.0825441	negligible	1283.32	1227.36	1339.29	0.209689	0.596939	1.09119	0.550548	0.999945	Not Sig	nonsignificant	.	.	family with sequence similarity 131, member A [Source:RGD Symbol;Acc:2322069]
Eef1e1	chr17	2045	1428	77.3387	90.1772	-12.8385	0.85763	2.25389e-07	2.25389e-07	FDR<0.05	-0.171969	negligible	413.583	418.119	409.048	0.251041	-0.134184	0.978306	0.893257	0.999945	Not Sig	nonsignificant	Y	.	eukaryotic translation elongation factor 1 epsilon 1 [Source:RGD Symbol;Acc:1311056]
Calml4	chr8	1305	686	85.5236	101.268	-15.7441	0.84453	2.28715e-07	2.28715e-07	FDR<0.05	-0.224297	small	230.844	202.065	259.623	0.295753	1.25602	1.28485	0.209109	0.999945	Not Sig	nonsignificant	.	Y	calmodulin-like 4 [Source:RGD Symbol;Acc:1583918]
Sec11a	chr1	1748	1276	80.0417	94.2366	-14.1949	0.849369	2.41846e-07	2.41846e-07	FDR<0.05	-0.175729	negligible	382.719	404.79	360.648	0.263449	-0.636108	0.890952	0.524706	0.999945	Not Sig	nonsignificant	.	Y	SEC11 homolog A, signal peptidase complex subunit [Source:RGD Symbol;Acc:69360]
Ngf	chr2	605	98	151.112	103.263	47.8487	1.46337	2.41979e-07	2.41979e-07	FDR<0.05	0.543595	medium	66.2215	28.5943	103.849	1.16755	1.5874	3.63179	0.112421	0.999945	Not Sig	nonsignificant	.	.	nerve growth factor [Source:RGD Symbol;Acc:1598328]
Ndufc1	chr2	6858	4715	81.1651	87.5952	-6.43001	0.926594	2.43098e-07	2.43098e-07	FDR<0.05	-0.0901401	negligible	1159.82	1189.65	1129.98	0.212485	-0.345284	0.949848	0.729881	0.999945	Not Sig	nonsignificant	.	.	NADH:ubiquinone oxidoreductase subunit C1 [Source:RGD Symbol;Acc:1586362]
Myl12b	chr9	14337	9538	98.3212	103.172	-4.85043	0.952987	2.43426e-07	2.43426e-07	FDR<0.05	-0.0698905	negligible	2906.14	2894.7	2917.59	0.201055	0.0550066	1.00791	0.956133	0.999945	Not Sig	nonsignificant	.	.	myosin light chain 12B [Source:RGD Symbol;Acc:628855]
Fmnl1	chr10	895	558	76.5293	97.3381	-20.8088	0.786221	2.47333e-07	2.47333e-07	FDR<0.05	-0.259752	small	160.337	157.525	163.149	0.338967	0.188256	1.0357	0.850676	0.999945	Not Sig	nonsignificant	.	.	formin-like 1 [Source:RGD Symbol;Acc:1311042]
Cdk5	chr4	3010	2074	108.43	120.454	-12.0239	0.900179	2.48904e-07	2.48904e-07	FDR<0.05	-0.147181	negligible	587.969	596.596	579.341	0.238991	-0.190365	0.971077	0.849023	0.999945	Not Sig	nonsignificant	.	.	cyclin-dependent kinase 5 [Source:RGD Symbol;Acc:70514]
Ctsd	chr1	6391	4433	93.585	101.023	-7.43754	0.926377	2.62898e-07	2.62898e-07	FDR<0.05	-0.114469	negligible	1305.62	1340.61	1270.62	0.215954	-0.36451	0.94779	0.715477	0.999945	Not Sig	nonsignificant	.	Y	cathepsin D [Source:RGD Symbol;Acc:621511]
Nme1	chr10	6956	4850	86.7716	92.8008	-6.02913	0.935031	2.64396e-07	2.64396e-07	FDR<0.05	-0.10603	negligible	1342.64	1372.63	1312.65	0.208147	-0.311254	0.956302	0.755607	0.999945	Not Sig	nonsignificant	.	.	NME/NM23 nucleoside diphosphate kinase 1 [Source:RGD Symbol;Acc:70497]
Rcn3	chr1	1254	814	88.281	105.004	-16.723	0.840739	2.71173e-07	2.71173e-07	FDR<0.05	-0.20385	small	237.981	223.435	252.526	0.271723	0.642911	1.1302	0.520282	0.999945	Not Sig	nonsignificant	.	.	reticulocalbin 3 [Source:RGD Symbol;Acc:1359365]
Drg1	chr14	1600	1191	107.899	119.765	-11.866	0.900922	2.76491e-07	2.76491e-07	FDR<0.05	-0.168528	negligible	340.447	368.867	312.027	0.261567	-0.941068	0.845908	0.34667	0.999945	Not Sig	nonsignificant	.	Y	developmentally regulated GTP binding protein 1 [Source:RGD Symbol;Acc:1304993]
Lmo3	chr4	2461	1414	73.8296	86.3144	-12.4848	0.855357	2.77343e-07	2.77343e-07	FDR<0.05	-0.136666	negligible	389.864	363.185	416.543	0.259068	0.742353	1.14692	0.457874	0.999945	Not Sig	nonsignificant	.	Y	LIM domain only 3 [Source:RGD Symbol;Acc:1561357]
Krtcap2	chr2	4049	2809	81.594	89.596	-8.00202	0.910688	2.8483e-07	2.8483e-07	FDR<0.05	-0.134295	negligible	77.8193	75.0728	80.5658	0.410117	0.205467	1.07317	0.837207	0.999945	Not Sig	nonsignificant	.	.	keratinocyte associated protein 2 [Source:RGD Symbol;Acc:1308413]
H1f0	chr7	1249	799	109.067	128.774	-19.707	0.846965	2.86404e-07	2.86404e-07	FDR<0.05	-0.225094	small	218.527	219.034	218.019	0.280166	-0.00889692	0.995367	0.992901	0.999945	Not Sig	nonsignificant	.	.	H1.0 linker histone [Source:RGD Symbol;Acc:2777]
Psmf1	chr3	1622	1120	97.8568	111.201	-13.3446	0.879996	2.86521e-07	2.86521e-07	FDR<0.05	-0.170386	negligible	321.318	321.496	321.139	0.258697	-0.0122202	0.998889	0.99025	0.999945	Not Sig	nonsignificant	.	.	proteasome inhibitor subunit 1 [Source:RGD Symbol;Acc:1587528]
Rsl24d1	chr8	2180	1601	98.3971	110.02	-11.6232	0.894354	2.97632e-07	2.97632e-07	FDR<0.05	-0.160499	negligible	464.088	472.872	455.305	0.254823	-0.226815	0.962849	0.820568	0.999945	Not Sig	nonsignificant	.	.	ribosomal L24 domain containing 1 [Source:RGD Symbol;Acc:1309784]
Reep5	chr18	5355	3411	85.6244	92.729	-7.10462	0.923383	3.03925e-07	3.03925e-07	FDR<0.05	-0.109134	negligible	780.053	748.205	811.901	0.222434	0.522372	1.08513	0.601412	0.999945	Not Sig	nonsignificant	Y	Y	receptor accessory protein 5 [Source:RGD Symbol;Acc:1306047]
Psma1	chr1	3876	2701	100.854	111.008	-10.1534	0.908534	3.18518e-07	3.18518e-07	FDR<0.05	-0.132455	negligible	790.32	796.7	783.94	0.226825	-0.111401	0.983985	0.911299	0.999945	Not Sig	nonsignificant	.	.	proteasome 20S subunit alpha 1 [Source:RGD Symbol;Acc:61841]
Rabac1	chr1	13460	9490	86.9389	91.7604	-4.82156	0.947455	3.25691e-07	3.25691e-07	FDR<0.05	-0.0763279	negligible	2690.48	2767	2613.96	0.204308	-0.404623	0.944692	0.685755	0.999945	Not Sig	nonsignificant	.	.	Rab acceptor 1 [Source:RGD Symbol;Acc:621002]
Mrps33	chr4	4656	3105	92.8274	100.704	-7.87629	0.921787	3.26635e-07	3.26635e-07	FDR<0.05	-0.131954	negligible	893.348	891.564	895.132	0.21508	0.0259291	1.004	0.979314	0.999945	Not Sig	nonsignificant	.	Y	mitochondrial ribosomal protein S33 [Source:RGD Symbol;Acc:1309217]
Mrpl33	chr6	6391	4233	92.6533	98.4343	-5.78103	0.94127	3.27512e-07	3.27512e-07	FDR<0.05	-0.108848	negligible	689.434	667.472	711.396	0.225081	0.416354	1.06581	0.677151	0.999945	Not Sig	nonsignificant	.	.	mitochondrial ribosomal protein L33 [Source:RGD Symbol;Acc:2322809]
Gdi2	chr17	4245	2834	85.0554	94.4795	-9.42411	0.900252	3.28175e-07	3.28175e-07	FDR<0.05	-0.114431	negligible	903.869	895.26	912.479	0.231655	0.109803	1.01923	0.912566	0.999945	Not Sig	nonsignificant	.	Y	GDP dissociation inhibitor 2 [Source:RGD Symbol;Acc:61802]
Synpr	chr15	3090	1903	110.298	121.496	-11.1978	0.907834	3.30893e-07	3.30893e-07	FDR<0.05	-0.134291	negligible	612.483	573.921	651.045	0.235213	0.759427	1.13438	0.447597	0.999945	Not Sig	nonsignificant	.	Y	synaptoporin [Source:RGD Symbol;Acc:708366]
Rpl14	chr8	13173	7761	66.3096	69.8595	-3.54989	0.949185	3.32291e-07	3.32291e-07	FDR<0.05	-0.0736647	negligible	2465.48	2376.94	2554.01	0.239884	0.437877	1.07449	0.661475	0.999945	Not Sig	nonsignificant	.	.	ribosomal protein L14 [Source:RGD Symbol;Acc:621180]
Slc7a5	chr19	260	142	126.339	88.794	37.5446	1.42283	3.35253e-07	3.35253e-07	FDR<0.05	0.564256	medium	32.3727	34.6946	30.0507	0.57311	-0.342872	0.866151	0.731694	0.999945	Not Sig	nonsignificant	.	Y	solute carrier family 7 member 5 [Source:RGD Symbol;Acc:620639]
Chmp1a	chr19	1881	1318	96.0381	108.905	-12.8674	0.881848	3.40571e-07	3.40571e-07	FDR<0.05	-0.165429	negligible	357.163	359.127	355.2	0.260997	-0.0821605	0.989065	0.934519	0.999945	Not Sig	nonsignificant	.	.	charged multivesicular body protein 1A [Source:RGD Symbol;Acc:1311083]
Psmb3	chr10	6658	4475	94.9607	101.205	-6.24418	0.938302	3.41764e-07	3.41764e-07	FDR<0.05	-0.102249	negligible	1274.86	1269.99	1279.73	0.2111	0.0480855	1.00767	0.961648	0.999945	Not Sig	nonsignificant	.	.	proteasome 20S subunit beta 3 [Source:RGD Symbol;Acc:61875]
Ndufb8	chr1	18679	12667	75.7903	79.0253	-3.23495	0.959064	3.4461e-07	3.4461e-07	FDR<0.05	-0.0678575	negligible	3576.02	3581.89	3570.14	0.199727	-0.0251515	0.996718	0.979934	0.999945	Not Sig	nonsignificant	.	.	NADH:ubiquinone oxidoreductase subunit B8 [Source:RGD Symbol;Acc:1309129]
Faim2	chr7	2565	1368	90.0563	102.334	-12.2772	0.880027	3.52441e-07	3.52441e-07	FDR<0.05	-0.164644	negligible	354.729	328.013	381.444	0.27136	0.82374	1.16289	0.410087	0.999945	Not Sig	nonsignificant	.	.	Fas apoptotic inhibitory molecule 2 [Source:RGD Symbol;Acc:628744]
Ndufb1	chr6	11417	6955	69.4092	73.392	-3.98283	0.945732	3.53847e-07	3.53847e-07	FDR<0.05	-0.0959134	negligible	251.23	237.783	264.677	0.270209	0.58289	1.1131	0.559967	0.999945	Not Sig	nonsignificant	.	.
Oaz1	chr7	34083	19208	99.7802	98.127	1.65319	1.01685	3.54268e-07	3.54268e-07	FDR<0.05	0.0580259	negligible	6423.78	5879.98	6967.59	0.20194	1.21177	1.18497	0.2256	0.999945	Not Sig	nonsignificant	.	.	ornithine decarboxylase antizyme 1 [Source:RGD Symbol;Acc:3219]
Ppib	chr8	8096	5475	78.951	84.4222	-5.47121	0.935192	3.60485e-07	3.60485e-07	FDR<0.05	-0.0883414	negligible	1589.99	1564.2	1615.79	0.207315	0.22235	1.03298	0.824041	0.999945	Not Sig	nonsignificant	.	.	peptidylprolyl isomerase B [Source:RGD Symbol;Acc:620312]
Atp1a1	chr2	2947	1354	128.226	117.924	10.3019	1.08736	3.61587e-07	3.61587e-07	FDR<0.05	0.184515	negligible	473.884	412.949	534.818	0.762073	0.491808	1.29512	0.622855	0.999945	Not Sig	nonsignificant	.	Y	ATPase Na+/K+ transporting subunit alpha 1 [Source:RGD Symbol;Acc:2167]
Rpl3	chr7	21194	12966	66.7151	70.0409	-3.32578	0.952517	3.61674e-07	3.61674e-07	FDR<0.05	-0.0292777	negligible	4136.96	3964.58	4309.35	0.196542	0.611621	1.08696	0.540789	0.999945	Not Sig	nonsignificant	.	.	ribosomal protein L3 [Source:RGD Symbol;Acc:735105]
LOC102550180	chr15	1738	1191	80.8392	91.4511	-10.612	0.88396	3.88511e-07	3.88511e-07	FDR<0.05	-0.17327	negligible	321.27	322.963	319.577	0.286356	-0.0547682	0.989516	0.956323	0.999945	Not Sig	nonsignificant	.	.
Pcp4	chr11	15150	7899	95.8142	101.227	-5.41257	0.94653	3.89295e-07	3.89295e-07	FDR<0.05	-0.0595433	negligible	2502.73	2231.6	2773.86	0.217615	1.44758	1.24299	0.147736	0.999945	Not Sig	nonsignificant	.	.	Purkinje cell protein 4 [Source:RGD Symbol;Acc:3271]
Cnrip1	chr14	4850	3175	102.96	112.224	-9.2643	0.917448	3.91326e-07	3.91326e-07	FDR<0.05	-0.0976525	negligible	950.49	912.963	988.018	0.226431	0.492921	1.08221	0.622069	0.999945	Not Sig	nonsignificant	.	.	cannabinoid receptor interacting protein 1 [Source:RGD Symbol;Acc:1308373]
Rps19l2	chr1	6165	3684	58.9077	64.9452	-6.03755	0.907036	3.94106e-07	3.94106e-07	FDR<0.05	-0.109567	negligible	371.608	345.193	398.024	0.248679	0.826281	1.15305	0.408645	0.999945	Not Sig	nonsignificant	.	.
LOC100362684	chr5	13328	7890	62.5428	65.9182	-3.37542	0.948794	4.02957e-07	4.02957e-07	FDR<0.05	-0.0745025	negligible	1660.14	1576.54	1743.74	0.219761	0.668567	1.10605	0.503772	0.999945	Not Sig	nonsignificant	.	.
LOC100362298	chr5	12829	8581	62.3099	65.6482	-3.33822	0.94915	4.11978e-07	4.11978e-07	FDR<0.05	-0.0877743	negligible	1354.28	1411.4	1297.16	0.210282	-0.574885	0.919059	0.565369	0.999945	Not Sig	nonsignificant	.	.
LOC100361060	chr1	9929	6364	76.0307	79.9938	-3.96316	0.950457	4.18261e-07	4.18261e-07	FDR<0.05	-0.0806254	negligible	74.0421	76.4321	71.6521	0.410671	-0.188613	0.937462	0.850397	0.999945	Not Sig	nonsignificant	.	.	ribosomal protein L36-like [Source:RGD Symbol;Acc:2320900]
Ndufa13	chr16	17018	11002	65.3719	68.3098	-2.93795	0.956991	4.3083e-07	4.3083e-07	FDR<0.05	-0.0642096	negligible	3336.52	3230.25	3442.8	0.198117	0.464912	1.0658	0.641994	0.999945	Not Sig	nonsignificant	.	.	NADH:ubiquinone oxidoreductase subunit A13 [Source:RGD Symbol;Acc:6492821]
Txndc9	chr9	2663	2036	78.0666	89.1258	-11.0592	0.875915	4.42411e-07	4.42411e-07	FDR<0.05	-0.137118	negligible	606.209	635.738	576.679	0.226156	-0.622091	0.9071	0.533882	0.999945	Not Sig	nonsignificant	Y	.	thioredoxin domain containing 9 [Source:RGD Symbol;Acc:708355]
Tcp1	chr1	3083	2356	82.1955	91.591	-9.39547	0.897419	4.6685e-07	4.6685e-07	FDR<0.05	-0.116648	negligible	585.835	614.041	557.63	0.271938	-0.530417	0.908131	0.595823	0.999945	Not Sig	nonsignificant	.	.	t-complex 1 [Source:RGD Symbol;Acc:3832]
LOC100911717	chr13	902	256	159.692	134.391	25.3014	1.18827	4.76894e-07	4.76894e-07	FDR<0.05	0.336845	small	78.3494	53.5997	103.099	0.441718	2.16711	1.9235	0.0302263	0.999945	Not Sig	nonsignificant	.	.
Hdhd2	chr18	3946	2692	93.2523	102.491	-9.23833	0.909862	5.06428e-07	5.06428e-07	FDR<0.05	-0.11606	negligible	218.283	214.193	222.374	0.314407	0.143206	1.03819	0.886127	0.999945	Not Sig	nonsignificant	.	.
Pfn2	chr2	8342	5520	91.9989	98.0198	-6.02088	0.938575	5.08367e-07	5.08367e-07	FDR<0.05	-0.0725052	negligible	1583.47	1571.22	1595.72	0.20963	0.101875	1.01559	0.918856	0.999945	Not Sig	nonsignificant	Y	Y	profilin 2 [Source:RGD Symbol;Acc:621826]
Mrps18b	chr20	1604	1208	82.5744	95.4314	-12.857	0.865275	5.2525e-07	5.2525e-07	FDR<0.05	-0.166936	negligible	342.562	368.89	316.234	0.257039	-0.86674	0.857259	0.386085	0.999945	Not Sig	nonsignificant	.	.	mitochondrial ribosomal protein S18B [Source:RGD Symbol;Acc:1302998]
Clpp	chr9	1826	1194	83.9544	96.4761	-12.5218	0.870209	5.37339e-07	5.37339e-07	FDR<0.05	-0.176809	negligible	332.388	344.925	319.851	0.320752	-0.313436	0.927307	0.753949	0.999945	Not Sig	nonsignificant	.	.	caseinolytic mitochondrial matrix peptidase proteolytic subunit [Source:RGD Symbol;Acc:1588583]
Ndufa7	chr7	8433	5427	84.5677	89.3628	-4.79518	0.94634	5.37988e-07	5.37988e-07	FDR<0.05	-0.091341	negligible	1286.19	1264.19	1308.2	0.214786	0.234788	1.03481	0.814374	0.999945	Not Sig	nonsignificant	.	.
Ehd3	chr6	1759	1051	78.2786	90.3237	-12.0452	0.866645	5.58124e-07	5.58124e-07	FDR<0.05	-0.150193	negligible	292.902	271.486	314.319	0.271614	0.752435	1.15777	0.45179	0.999945	Not Sig	nonsignificant	.	.	EH-domain containing 3 [Source:RGD Symbol;Acc:621762]
Gatd3a	chr20	3381	2193	101.133	110.553	-9.41949	0.914796	5.65485e-07	5.65485e-07	FDR<0.05	-0.120407	negligible	675.365	667.867	682.863	0.222396	0.144729	1.02245	0.884925	0.999945	Not Sig	nonsignificant	.	.	glutamine amidotransferase class 1 domain containing 3A [Source:RGD Symbol;Acc:1303003]
Nsg1	chr14	6729	4079	100.83	108.33	-7.50046	0.930763	5.98613e-07	5.98613e-07	FDR<0.05	-0.0865185	negligible	1102.81	1060.01	1145.62	0.212293	0.530248	1.08076	0.59594	0.999945	Not Sig	nonsignificant	.	Y	neuronal vesicle trafficking associated 1 [Source:RGD Symbol;Acc:2222]
Septin5	chr11	4297	2148	96.2374	105.55	-9.31236	0.911773	6.09654e-07	6.09654e-07	FDR<0.05	-0.126823	negligible	168.69	120.08	217.3	0.36841	2.37879	1.80962	0.0173694	0.999945	Not Sig	nonsignificant	.	.	septin 5 [Source:RGD Symbol;Acc:621763]
Diras2	chr17	1908	1141	91.0052	103.648	-12.6426	0.878023	6.30566e-07	6.30566e-07	FDR<0.05	-0.157569	negligible	238.242	225.479	251.006	0.284442	0.517844	1.11322	0.604567	0.999945	Not Sig	nonsignificant	Y	.	DIRAS family GTPase 2 [Source:RGD Symbol;Acc:1305580]
Znrd2	chr1	1442	1080	74.3109	86.3252	-12.0143	0.860825	6.38655e-07	6.38655e-07	FDR<0.05	-0.163717	negligible	269.907	288.582	251.231	0.262193	-0.761455	0.870573	0.446386	0.999945	Not Sig	nonsignificant	.	.	zinc ribbon domain containing 2 [Source:RGD Symbol;Acc:1593467]
Idi1	chr17	3631	526	132.289	108.013	24.2765	1.22475	6.46285e-07	6.46285e-07	FDR<0.05	0.221316	small	409.599	151.611	667.588	0.299753	7.11366	4.40331	1.13003e-12	1.0949e-09	FDR<0.05	upregulated	.	Y	isopentenyl-diphosphate delta isomerase 1 [Source:RGD Symbol;Acc:621835]
Kcnab2	chr5	5041	3232	106.854	117.389	-10.535	0.910256	6.75318e-07	6.75318e-07	FDR<0.05	-0.0955978	negligible	694.883	684.392	705.374	0.228949	0.186225	1.03066	0.852269	0.999945	Not Sig	nonsignificant	.	.	potassium voltage-gated channel subfamily A regulatory beta subunit 2 [Source:RGD Symbol;Acc:61828]
Selenow	chr1	62423	44193	106.652	109.032	-2.38016	0.97817	6.89179e-07	6.89179e-07	FDR<0.05	-0.0296058	negligible	12483.1	12853.2	12113	0.198946	-0.430313	0.942406	0.666968	0.999945	Not Sig	nonsignificant	.	.	selenoprotein W [Source:RGD Symbol;Acc:3661]
Terf2ip	chr19	473	252	136.048	106.258	29.7901	1.28036	6.92704e-07	6.92704e-07	FDR<0.05	0.355295	small	66.7506	60.8011	72.7001	0.480689	0.538901	1.1957	0.589955	0.999945	Not Sig	nonsignificant	.	Y	TERF2 interacting protein [Source:RGD Symbol;Acc:1309684]
Ndufb3	chr9	10442	6961	70.8609	75.3902	-4.5293	0.939922	7.01529e-07	7.01529e-07	FDR<0.05	-0.0809364	negligible	1656.77	1646.78	1666.75	0.205486	0.0864822	1.01213	0.931083	0.999945	Not Sig	nonsignificant	.	Y	NADH:ubiquinone oxidoreductase subunit B3 [Source:RGD Symbol;Acc:1310737]
Cyb5r3	chr7	2555	1702	97.6379	107.662	-10.0244	0.90689	7.05267e-07	7.05267e-07	FDR<0.05	-0.161973	negligible	511.352	506.155	516.55	0.255832	0.098194	1.02054	0.921778	0.999945	Not Sig	nonsignificant	.	.	cytochrome b5 reductase 3 [Source:RGD Symbol;Acc:2502]
Tmem14c	chr17	3611	2369	92.6336	100.005	-7.37145	0.926289	7.10447e-07	7.10447e-07	FDR<0.05	-0.14336	negligible	632.346	617.829	646.862	0.224979	0.29193	1.04699	0.770341	0.999945	Not Sig	nonsignificant	.	.	transmembrane protein 14C [Source:RGD Symbol;Acc:621692]
Bsg	chr7	4357	1967	80.558	89.0512	-8.49326	0.904625	7.17513e-07	7.17513e-07	FDR<0.05	-0.107246	negligible	620.462	522.898	718.026	0.301716	1.53815	1.37317	0.124012	0.999945	Not Sig	nonsignificant	.	.	basigin (Ok blood group) [Source:RGD Symbol;Acc:2220]
Dctn3	chr5	6792	4294	101.116	108.587	-7.47105	0.931197	7.23123e-07	7.23123e-07	FDR<0.05	-0.0953757	negligible	1294.13	1263.02	1325.25	0.21207	0.329514	1.04927	0.741767	0.999945	Not Sig	nonsignificant	.	.	dynactin subunit 3 [Source:RGD Symbol;Acc:1309547]
Churc1	chr6	3351	2035	83.3463	92.059	-8.7127	0.905357	7.32402e-07	7.32402e-07	FDR<0.05	-0.123481	negligible	548.726	495.077	602.376	0.238727	1.17621	1.21673	0.239512	0.999945	Not Sig	nonsignificant	.	.
Rbis	chr2	2382	1628	78.2073	88.4774	-10.2701	0.883924	7.43552e-07	7.43552e-07	FDR<0.05	-0.182822	negligible	378.281	372.608	383.954	0.247423	0.17521	1.03045	0.860914	0.999945	Not Sig	nonsignificant	.	.	ribosomal biogenesis factor [Source:RGD Symbol;Acc:1565641]
Get1	chr11	1073	796	85.529	99.9427	-14.4137	0.85578	7.5867e-07	7.5867e-07	FDR<0.05	-0.238637	small	183.464	191.807	175.12	0.355789	-0.406958	0.913003	0.684039	0.999945	Not Sig	nonsignificant	Y	Y	guided entry of tail-anchored proteins factor 1 [Source:RGD Symbol;Acc:735104]
Cluap1	chr10	1402	1006	91.8179	109.961	-18.1433	0.835003	7.60842e-07	7.60842e-07	FDR<0.05	-0.159626	negligible	290.045	309.689	270.402	0.26742	-0.751437	0.873139	0.45239	0.999945	Not Sig	nonsignificant	.	.	clusterin associated protein 1 [Source:RGD Symbol;Acc:1359189]
Ssu72	chr5	5146	3480	87.4773	94.5126	-7.0353	0.925562	7.79728e-07	7.79728e-07	FDR<0.05	-0.103983	negligible	922.521	913.536	931.506	0.217447	0.123314	1.01967	0.901859	0.999945	Not Sig	nonsignificant	Y	.	SSU72 homolog, RNA polymerase II CTD phosphatase [Source:RGD Symbol;Acc:1307854]
Coa6	chr19	451	269	79.4194	107.584	-28.1644	0.73821	7.82054e-07	7.82054e-07	FDR<0.05	-0.372817	small	8.40931	7.35785	9.46077	1.03294	0.364797	1.28581	0.715263	0.999945	Not Sig	nonsignificant	.	.	cytochrome c oxidase assembly factor 6 [Source:RGD Symbol;Acc:7559315]
Sdf2	chr10	3737	2470	90.7413	99.807	-9.06573	0.909167	7.9163e-07	7.9163e-07	FDR<0.05	-0.109899	negligible	750.523	741.604	759.443	0.222076	0.152198	1.02405	0.879031	0.999945	Not Sig	nonsignificant	.	.	stromal cell derived factor 2 [Source:RGD Symbol;Acc:1307274]
Chchd5	chr3	1434	1062	83.6711	96.2421	-12.5709	0.869382	7.9386e-07	7.9386e-07	FDR<0.05	-0.189543	negligible	24.7099	23.2784	26.1415	0.624015	0.253255	1.12299	0.800071	0.999945	Not Sig	nonsignificant	Y	.	coiled-coil-helix-coiled-coil-helix domain containing 5 [Source:RGD Symbol;Acc:1307809]
Mapre1	chr3	2113	1047	101.719	88.3375	13.3813	1.15148	7.9535e-07	7.9535e-07	FDR<0.05	0.190306	negligible	260.785	213.671	307.898	0.314963	1.6356	1.44099	0.101924	0.999945	Not Sig	nonsignificant	.	.	microtubule-associated protein, RP/EB family, member 1 [Source:RGD Symbol;Acc:621781]
Cend1	chr1	5880	4205	103.458	111.508	-8.04981	0.92781	8.10335e-07	8.10335e-07	FDR<0.05	-0.0964868	negligible	1149.91	1197.48	1102.34	0.215126	-0.56054	0.920549	0.575111	0.999945	Not Sig	nonsignificant	.	.	cell cycle exit and neuronal differentiation 1 [Source:RGD Symbol;Acc:1309401]
Pfdn5	chr7	7078	4656	73.8069	79.0997	-5.29278	0.933087	8.10836e-07	8.10836e-07	FDR<0.05	-0.0904392	negligible	1318.02	1305.88	1330.15	0.210292	0.130309	1.01859	0.896322	0.999945	Not Sig	nonsignificant	.	.	prefoldin subunit 5 [Source:RGD Symbol;Acc:1311436]
Spry2	chr15	2163	107	121.209	78.4019	42.8068	1.54599	8.46346e-07	8.46346e-07	FDR<0.05	0.397539	small	203.981	25.9755	381.986	1.4755	2.62707	14.7056	0.00861247	0.944691	Not Sig	nonsignificant	.	Y	sprouty RTK signaling antagonist 2 [Source:RGD Symbol;Acc:1311472]
Impdh2	chr8	1582	761	112.541	95.8392	16.7016	1.17427	8.83955e-07	8.83955e-07	FDR<0.05	0.217096	small	261.074	211.784	310.364	0.29384	1.85674	1.46548	0.0633486	0.999945	Not Sig	nonsignificant	.	.	inosine monophosphate dehydrogenase 2 [Source:RGD Symbol;Acc:735092]
Ppp1ca	chr1	4939	3228	90.9349	98.6817	-7.74675	0.921498	9.04164e-07	9.04164e-07	FDR<0.05	-0.0973629	negligible	988.01	990.908	985.111	0.214138	-0.0395808	0.994149	0.968427	0.999945	Not Sig	nonsignificant	.	.	protein phosphatase 1 catalytic subunit alpha [Source:RGD Symbol;Acc:3375]
Sh3gl1	chr9	1416	465	160.406	138.542	21.8631	1.15781	9.12507e-07	9.12507e-07	FDR<0.05	0.21676	small	233.559	159.962	307.157	0.350119	2.69896	1.92019	0.00695564	0.793415	Not Sig	nonsignificant	.	.	SH3 domain containing GRB2 like 1, endophilin A2 [Source:RGD Symbol;Acc:708456]
Ran	chr12	10822	7246	90.1817	96.0326	-5.85093	0.939074	9.24108e-07	9.24108e-07	FDR<0.05	-0.0701635	negligible	2206.73	2218.87	2194.58	0.204285	-0.0805966	0.989052	0.935763	0.999945	Not Sig	nonsignificant	.	Y	RAN, member RAS oncogene family [Source:RGD Symbol;Acc:620367]
Eif3c	chr1	3114	1954	83.8858	93.7328	-9.84697	0.894946	9.37851e-07	9.37851e-07	FDR<0.05	-0.145294	negligible	634.833	601.596	668.071	0.234144	0.638692	1.1105	0.523023	0.999945	Not Sig	nonsignificant	.	.	eukaryotic translation initiation factor 3, subunit C [Source:RGD Symbol;Acc:1308871]
Vps4a	chr19	852	411	93.237	115.672	-22.4351	0.806045	9.39424e-07	9.39424e-07	FDR<0.05	-0.311046	small	110.968	91.226	130.709	0.391286	1.37474	1.43281	0.169212	0.999945	Not Sig	nonsignificant	.	.	vacuolar protein sorting 4 homolog A [Source:RGD Symbol;Acc:628810]
Hspa14	chr17	996	372	121.662	96.4582	25.204	1.2613	9.56426e-07	9.56426e-07	FDR<0.05	0.266596	small	152.232	113.38	191.084	0.329741	2.28847	1.68534	0.02211	0.999945	Not Sig	nonsignificant	.	.	heat shock protein family A (Hsp70) member 14 [Source:RGD Symbol;Acc:1303296]
Hddc3	chr1	1345	862	83.7092	95.9592	-12.25	0.872341	9.62133e-07	9.62133e-07	FDR<0.05	-0.235263	small	273.01	273.551	272.469	0.263446	-0.0130834	0.996044	0.989561	0.999945	Not Sig	nonsignificant	.	.	HD domain containing 3 [Source:RGD Symbol;Acc:1311839]
Ensa	chr2	7925	5913	98.6586	105.764	-7.10541	0.932818	9.68498e-07	9.68498e-07	FDR<0.05	-0.0720375	negligible	1635.02	1735.45	1534.6	0.206065	-0.863583	0.884267	0.387817	0.999945	Not Sig	nonsignificant	.	Y	endosulfine alpha [Source:RGD Symbol;Acc:62007]
Actr1a	chr1	4899	3258	100.684	108.915	-8.23098	0.924427	9.74395e-07	9.74395e-07	FDR<0.05	-0.110713	negligible	642.041	652.61	631.473	0.258428	-0.201347	0.967612	0.840427	0.999945	Not Sig	nonsignificant	.	.	actin related protein 1A [Source:RGD Symbol;Acc:1307025]
Yipf5	chr18	1775	1286	73.5471	87.809	-14.2619	0.83758	9.76753e-07	9.76753e-07	FDR<0.05	-0.164428	negligible	377.201	391.384	363.017	0.246188	-0.449452	0.927521	0.653105	0.999945	Not Sig	nonsignificant	.	.	Yip1 domain family, member 5 [Source:RGD Symbol;Acc:1359165]
Fahd1	chr10	474	442	108.173	140.893	-32.7204	0.767765	9.81029e-07	9.81029e-07	FDR<0.05	-0.284228	small	120.228	145.352	95.1042	0.337972	-1.82446	0.654304	0.0680825	0.999945	Not Sig	nonsignificant	.	Y	fumarylacetoacetate hydrolase domain containing 1 [Source:RGD Symbol;Acc:1304560]
Fez1	chr8	7236	4573	97.8736	104.997	-7.12325	0.932157	1.00829e-06	1.00829e-06	FDR<0.05	-0.0938766	negligible	1413.42	1355.01	1471.84	0.211817	0.557777	1.08621	0.576997	0.999945	Not Sig	nonsignificant	.	.	fasciculation and elongation protein zeta 1 [Source:RGD Symbol;Acc:619708]
Tmbim4	chr7	2505	1651	72.8561	82.1467	-9.29063	0.886902	1.02186e-06	1.02186e-06	FDR<0.05	-0.150934	negligible	467.753	453.781	481.725	0.2364	0.364714	1.06158	0.715325	0.999945	Not Sig	nonsignificant	.	.	transmembrane BAX inhibitor motif containing 4 [Source:RGD Symbol;Acc:735173]
Pdhb	chr15	4592	3152	107.327	116.792	-9.46481	0.91896	1.05027e-06	1.05027e-06	FDR<0.05	-0.113831	negligible	928.615	921.967	935.263	0.218706	0.0880368	1.01442	0.929847	0.999945	Not Sig	nonsignificant	.	.	pyruvate dehydrogenase E1 subunit beta [Source:RGD Symbol;Acc:1359146]
Ube2l3	chr11	4024	2803	86.8727	94.6282	-7.7555	0.918042	1.08653e-06	1.08653e-06	FDR<0.05	-0.1267	negligible	399.879	389.788	409.969	0.257239	0.265917	1.05177	0.790303	0.999945	Not Sig	nonsignificant	.	Y	ubiquitin-conjugating enzyme E2L 3 [Source:RGD Symbol;Acc:1308361]
LOC681282	chr7	527	437	84.1863	104.889	-20.7023	0.802626	1.0985e-06	1.0985e-06	FDR<0.05	-0.330718	small	115.602	123.304	107.901	0.3412	-0.565499	0.875083	0.571734	0.999945	Not Sig	nonsignificant	.	.
Cox19	chr12	1398	987	100.654	117.523	-16.8695	0.856458	1.10568e-06	1.10568e-06	FDR<0.05	-0.204681	small	41.0375	47.8926	34.1825	0.525846	-0.963137	0.713733	0.335479	0.999945	Not Sig	nonsignificant	.	.	cytochrome c oxidase assembly factor COX19 [Source:RGD Symbol;Acc:1305631]
Usf2	chr1	190	129	68.6697	107.222	-38.5527	0.640442	1.11983e-06	1.11983e-06	FDR<0.05	-0.514031	medium	17.8597	17.5692	18.1502	0.831979	0.120701	1.03306	0.903928	0.999945	Not Sig	nonsignificant	.	.	upstream transcription factor 2, c-fos interacting [Source:RGD Symbol;Acc:620975]
Nhp2	chr10	2559	1733	72.8392	80.699	-7.85977	0.902604	1.14134e-06	1.14134e-06	FDR<0.05	-0.14686	negligible	494.764	491.697	497.831	0.23401	0.0730627	1.01248	0.941756	0.999945	Not Sig	nonsignificant	.	.	NHP2 ribonucleoprotein [Source:RGD Symbol;Acc:1309435]
Sucla2	chr15	4602	3252	103.986	113.001	-9.01509	0.920221	1.15925e-06	1.15925e-06	FDR<0.05	-0.102377	negligible	943.183	930.09	956.275	0.234301	0.158559	1.02815	0.874016	0.999945	Not Sig	nonsignificant	.	.	succinate-CoA ligase ADP-forming subunit beta [Source:RGD Symbol;Acc:1309397]
Ndufa11	chr9	6503	4247	76.9533	82.1038	-5.15049	0.937269	1.16327e-06	1.16327e-06	FDR<0.05	-0.117923	negligible	1154.58	1159.35	1149.8	0.20987	-0.057343	0.991758	0.954272	0.999945	Not Sig	nonsignificant	.	.	NADH:ubiquinone oxidoreductase subunit A11 [Source:RGD Symbol;Acc:1303292]
Polr2j	chr12	3251	2301	97.4238	105.857	-8.43302	0.920336	1.17462e-06	1.17462e-06	FDR<0.05	-0.136178	negligible	533.367	542.834	523.899	0.230502	-0.218137	0.965118	0.827322	0.999945	Not Sig	nonsignificant	.	.	RNA polymerase II subunit J [Source:RGD Symbol;Acc:1310198]
Mrps35	chr4	1603	1140	79.5307	90.2731	-10.7424	0.881001	1.23895e-06	1.23895e-06	FDR<0.05	-0.18753	negligible	328.169	343.938	312.4	0.263213	-0.539731	0.908304	0.589383	0.999945	Not Sig	nonsignificant	.	.	mitochondrial ribosomal protein S35 [Source:RGD Symbol;Acc:1306720]
Aprt	chr19	2628	1754	88.755	98.5878	-9.83281	0.900263	1.25474e-06	1.25474e-06	FDR<0.05	-0.147501	negligible	99.2698	87.3515	111.188	0.3595	0.995424	1.27288	0.31953	0.999945	Not Sig	nonsignificant	.	.	adenine phosphoribosyl transferase [Source:RGD Symbol;Acc:1307758]
Rit2	chr18	3522	2364	89.1915	98.8505	-9.659	0.902287	1.32594e-06	1.32594e-06	FDR<0.05	-0.126776	negligible	642.441	626.869	658.013	0.251343	0.260918	1.04968	0.794156	0.999945	Not Sig	nonsignificant	.	Y	Ras-like without CAAX 2 [Source:RGD Symbol;Acc:1307654]
Smu1	chr5	1374	899	91.3265	105.807	-14.4807	0.863141	1.33006e-06	1.33006e-06	FDR<0.05	-0.202176	small	256.324	247.527	265.122	0.291705	0.311982	1.07108	0.755054	0.999945	Not Sig	nonsignificant	.	.	SMU1, DNA replication regulator and spliceosomal factor [Source:RGD Symbol;Acc:620694]
Guk1	chr10	4825	2539	104.455	112.587	-8.13155	0.927775	1.36919e-06	1.36919e-06	FDR<0.05	-0.130741	negligible	859.165	762.412	955.919	0.272477	1.20978	1.25381	0.226362	0.999945	Not Sig	nonsignificant	.	.	guanylate kinase 1 [Source:RGD Symbol;Acc:1309638]
Alyref	chr10	348	109	112.427	80.9927	31.4341	1.38811	1.4022e-06	1.4022e-06	FDR<0.05	0.527634	medium	41.2146	30.2685	52.1608	0.707338	1.16252	1.72327	0.245022	0.999945	Not Sig	nonsignificant	.	Y	Aly/REF export factor [Source:RGD Symbol;Acc:1594679]
Arl3	chr1	6193	3828	71.0515	76.3946	-5.34317	0.930058	1.40995e-06	1.40995e-06	FDR<0.05	-0.114273	negligible	1175.82	1122.54	1229.1	0.210811	0.621688	1.09493	0.534147	0.999945	Not Sig	nonsignificant	.	.	ADP ribosylation factor like GTPase 3 [Source:RGD Symbol;Acc:69327]
Ncald	chr7	5495	3133	83.5108	91.4929	-7.98208	0.912757	1.42648e-06	1.42648e-06	FDR<0.05	-0.114079	negligible	813.768	725.688	901.848	0.232763	1.33625	1.24275	0.181468	0.999945	Not Sig	nonsignificant	.	Y	neurocalcin delta [Source:RGD Symbol;Acc:1560287]
Prdx3	chr1	2824	1976	104.257	113.691	-9.43436	0.917018	1.42983e-06	1.42983e-06	FDR<0.05	-0.142072	negligible	584.902	591.934	577.871	0.239004	-0.153478	0.976242	0.878022	0.999945	Not Sig	nonsignificant	.	.	peroxiredoxin 3 [Source:RGD Symbol;Acc:620040]
Ndufb2	chr4	13468	6186	80.4388	84.3467	-3.90797	0.953668	1.50361e-06	1.50361e-06	FDR<0.05	-0.0745501	negligible	1970.75	1659.71	2281.8	0.305519	1.5109	1.37482	0.130815	0.999945	Not Sig	nonsignificant	.	.	NADH:ubiquinone oxidoreductase subunit B2 [Source:RGD Symbol;Acc:1308130]
Tmem126a	chr1	806	603	62.6499	78.0645	-15.4146	0.80254	1.51269e-06	1.51269e-06	FDR<0.05	-0.255914	small	162.488	169.023	155.953	0.305426	-0.396784	0.922669	0.691527	0.999945	Not Sig	nonsignificant	.	Y	transmembrane protein 126A [Source:RGD Symbol;Acc:1305677]
Psmc1	chr6	7008	4430	74.5837	79.8585	-5.27481	0.933948	1.52411e-06	1.52411e-06	FDR<0.05	-0.0960324	negligible	1376.52	1314.27	1438.77	0.214968	0.600673	1.09473	0.548058	0.999945	Not Sig	nonsignificant	.	.	proteasome 26S subunit, ATPase 1 [Source:RGD Symbol;Acc:621097]
Prkar1b	chr12	7294	4823	102.729	110.875	-8.1457	0.926532	1.5279e-06	1.5279e-06	FDR<0.05	-0.090506	negligible	1331.81	1320.16	1343.47	0.211799	0.114299	1.01765	0.909001	0.999945	Not Sig	nonsignificant	Y	.	protein kinase cAMP-dependent type I regulatory subunit beta [Source:RGD Symbol;Acc:3392]
Tomm34	chr3	2652	1886	150.29	164.957	-14.6664	0.91109	1.53576e-06	1.53576e-06	FDR<0.05	-0.134939	negligible	546.96	544.254	549.665	0.248371	0.0397746	1.00994	0.968273	0.999945	Not Sig	nonsignificant	.	.	translocase of outer mitochondrial membrane 34 [Source:RGD Symbol;Acc:1309029]
Rcn2	chr8	670	468	96.7958	118.973	-22.1773	0.813594	1.5456e-06	1.5456e-06	FDR<0.05	-0.281667	small	111.772	126.47	97.0746	0.435889	-0.845112	0.767569	0.398048	0.999945	Not Sig	nonsignificant	.	Y	reticulocalbin 2 [Source:RGD Symbol;Acc:3548]
Fis1	chr12	8876	6182	81.3601	86.0521	-4.69201	0.945475	1.57956e-06	1.57956e-06	FDR<0.05	-0.0805049	negligible	1747.74	1788.6	1706.89	0.204114	-0.332062	0.954312	0.739842	0.999945	Not Sig	nonsignificant	.	.	fission, mitochondrial 1 [Source:RGD Symbol;Acc:1306668]
Uqcc3	chr1	1519	1141	75.0336	87.3098	-12.2761	0.859396	1.63804e-06	1.63804e-06	FDR<0.05	-0.196856	negligible	284.417	306.65	262.184	0.265787	-0.856753	0.854997	0.391581	0.999945	Not Sig	nonsignificant	.	.	ubiquinol-cytochrome c reductase complex assembly factor 3 [Source:RGD Symbol;Acc:1597344]
Lamtor1	chr1	3495	2371	89.4568	96.5201	-7.06324	0.926821	1.66523e-06	1.66523e-06	FDR<0.05	-0.140324	negligible	685.528	700.568	670.488	0.22888	-0.268712	0.957063	0.788152	0.999945	Not Sig	nonsignificant	.	.	late endosomal/lysosomal adaptor, MAPK and MTOR activator 1 [Source:RGD Symbol;Acc:735078]
Sdr39u1	chr15	1743	1136	101.924	115.02	-13.0967	0.886136	1.67971e-06	1.67971e-06	FDR<0.05	-0.164795	negligible	328.165	338.725	317.604	0.255061	-0.365011	0.937646	0.715103	0.999945	Not Sig	nonsignificant	.	.	short chain dehydrogenase/reductase family 39U, member 1 [Source:RGD Symbol;Acc:1309307]
Mmp24os	chr3	3064	2048	107.016	117.209	-10.1934	0.913033	1.72031e-06	1.72031e-06	FDR<0.05	-0.128344	negligible	560.885	564.333	557.438	0.234496	-0.073771	0.987782	0.941193	0.999945	Not Sig	nonsignificant	.	.
Ndufb5	chr2	9121	6036	76.8491	81.1572	-4.30801	0.946918	1.74443e-06	1.74443e-06	FDR<0.05	-0.0763799	negligible	1715.9	1700.57	1731.23	0.206521	0.122356	1.01803	0.902617	0.999945	Not Sig	nonsignificant	.	.	NADH:ubiquinone oxidoreductase subunit B5 [Source:RGD Symbol;Acc:1305909]
LOC306766	chr17	2677	1684	88.2914	97.7101	-9.41865	0.903606	1.76151e-06	1.76151e-06	FDR<0.05	-0.127074	negligible	518.127	511.228	525.026	0.261525	0.15719	1.02699	0.875095	0.999945	Not Sig	nonsignificant	.	.	hypothetical LOC306766 [Source:RGD Symbol;Acc:1359256]
Psmb6	chr10	9814	6636	75.0546	79.5196	-4.46504	0.94385	1.87983e-06	1.87983e-06	FDR<0.05	-0.0848672	negligible	542.922	527.387	558.456	0.230183	0.355391	1.05891	0.722297	0.999945	Not Sig	nonsignificant	.	.	proteasome 20S subunit beta 6 [Source:RGD Symbol;Acc:61881]
Atp6v1c1	chr7	8574	5675	110.356	118.534	-8.17738	0.931012	1.97528e-06	1.97528e-06	FDR<0.05	-0.0801619	negligible	1771.53	1722.55	1820.51	0.22309	0.350683	1.05687	0.725826	0.999945	Not Sig	nonsignificant	.	.	ATPase H+ transporting V1 subunit C1 [Source:RGD Symbol;Acc:1311082]
Utp11	chr5	1485	1078	81.6282	93.7155	-12.0874	0.87102	2.07282e-06	2.07282e-06	FDR<0.05	-0.186399	negligible	305.221	314.821	295.62	0.272307	-0.353099	0.939009	0.724014	0.999945	Not Sig	nonsignificant	.	Y	UTP11, small subunit processome component [Source:RGD Symbol;Acc:621412]
Sfr1	chr1	2143	1689	88.1333	100.378	-12.2452	0.87801	2.10679e-06	2.10679e-06	FDR<0.05	-0.137792	negligible	482.033	510.604	453.463	0.250467	-0.694429	0.88809	0.487413	0.999945	Not Sig	nonsignificant	.	.	SWI5-dependent homologous recombination repair protein 1 [Source:RGD Symbol;Acc:1305481]
Rnps1	chr10	1475	952	91.9491	109.141	-17.1923	0.842477	2.15656e-06	2.15656e-06	FDR<0.05	-0.192424	negligible	298.413	293.61	303.216	0.258126	0.171895	1.03272	0.86352	0.999945	Not Sig	nonsignificant	.	.	RNA binding protein with serine rich domain 1 [Source:RGD Symbol;Acc:1307522]
Taldo1	chr1	6214	3814	84.2929	89.9536	-5.6607	0.937071	2.17289e-06	2.17289e-06	FDR<0.05	-0.0978858	negligible	1209.04	1146.14	1271.94	0.214376	0.695418	1.10976	0.486793	0.999945	Not Sig	nonsignificant	.	.	transaldolase 1 [Source:RGD Symbol;Acc:620674]
Eif2b2	chr6	774	510	87.8637	105.382	-17.5182	0.833764	2.18774e-06	2.18774e-06	FDR<0.05	-0.303097	small	156.359	154.2	158.517	0.321493	0.158523	1.028	0.874045	0.999945	Not Sig	nonsignificant	.	.	eukaryotic translation initiation factor 2B subunit beta [Source:RGD Symbol;Acc:620820]
Srxn1	chr3	739	197	154.48	120.161	34.3193	1.28561	2.24328e-06	2.24328e-06	FDR<0.05	0.318802	small	78.035	41.7903	114.28	0.532094	2.75781	2.7346	0.00581905	0.704772	Not Sig	nonsignificant	.	.	sulfiredoxin 1 [Source:RGD Symbol;Acc:1307332]
Ywhaq	chr6	10596	7086	99.798	105.29	-5.49248	0.947835	2.27312e-06	2.27312e-06	FDR<0.05	-0.0672903	negligible	1933.14	1921.26	1945.02	0.209269	0.0807604	1.01237	0.935633	0.999945	Not Sig	nonsignificant	.	Y	tyrosine 3-monooxygenase/tryptophan 5-monooxygenase activation protein, theta [Source:RGD Symbol;Acc:3979]
LOC120099911	chr1	2277	1579	98.0105	109.926	-11.9156	0.891603	2.2899e-06	2.2899e-06	FDR<0.05	-0.15154	negligible	1542.13	1503.55	1580.71	0.206061	0.34996	1.05131	0.726368	0.999945	Not Sig	nonsignificant	.	.
Pcmt1	chr1	3311	2133	99.8986	110.014	-10.1154	0.908054	2.32945e-06	2.32945e-06	FDR<0.05	-0.134832	negligible	379.99	368.133	391.847	0.251317	0.341825	1.06442	0.732482	0.999945	Not Sig	nonsignificant	.	Y	protein-L-isoaspartate (D-aspartate) O-methyltransferase 1 [Source:RGD Symbol;Acc:3268]
Ppp2r1a	chr1	12212	8527	103.356	108.854	-5.49823	0.94949	2.38337e-06	2.38337e-06	FDR<0.05	-0.0633815	negligible	2610.94	2625.75	2596.13	0.221779	-0.0788837	0.988721	0.937125	0.999945	Not Sig	nonsignificant	.	.	protein phosphatase 2 scaffold subunit A alpha [Source:RGD Symbol;Acc:620907]
Smim8	chr5	767	575	97.1242	119.144	-22.0197	0.815184	2.42379e-06	2.42379e-06	FDR<0.05	-0.268767	small	141.006	145.43	136.583	0.313508	-0.29311	0.939163	0.769438	0.999945	Not Sig	nonsignificant	.	.	small integral membrane protein 8 [Source:RGD Symbol;Acc:1305158]
Rab5c	chr10	1394	869	87.0617	101.43	-14.368	0.858345	2.42644e-06	2.42644e-06	FDR<0.05	-0.207862	small	176.58	172.634	180.526	0.31393	0.240246	1.04572	0.810139	0.999945	Not Sig	nonsignificant	.	Y	RAB5C, member RAS oncogene family [Source:RGD Symbol;Acc:1307095]
Enc1	chr2	3786	1749	112.563	106.225	6.33776	1.05966	2.43437e-06	2.43437e-06	FDR<0.05	0.12294	negligible	310.892	255.377	366.406	0.27895	1.89196	1.43477	0.0584959	0.999945	Not Sig	nonsignificant	.	Y	ectodermal-neural cortex 1 [Source:RGD Symbol;Acc:1303152]
Cstb	chr20	4117	3012	95.0121	102.127	-7.11465	0.930335	2.46005e-06	2.46005e-06	FDR<0.05	-0.117523	negligible	859.016	900.308	817.723	0.22475	-0.617953	0.90827	0.536606	0.999945	Not Sig	nonsignificant	.	.	cystatin B [Source:RGD Symbol;Acc:2435]
Rpl18	chr1	10567	7021	73.9151	77.9377	-4.02259	0.948387	2.57614e-06	2.57614e-06	FDR<0.05	-0.0863175	negligible	1948.66	1958.85	1938.48	0.202892	-0.072984	0.989599	0.941819	0.999945	Not Sig	nonsignificant	.	.	ribosomal protein L18 [Source:RGD Symbol;Acc:621182]
Pdap1	chr12	1011	593	69.4949	85.557	-16.0621	0.812264	2.84871e-06	2.84871e-06	FDR<0.05	-0.232093	small	117.222	113.196	121.247	0.34477	0.307565	1.07113	0.758414	0.999945	Not Sig	nonsignificant	.	.	PDGFA associated protein 1 [Source:RGD Symbol;Acc:620442]
Mrpl34	chr16	2020	1387	89.5435	99.6178	-10.0743	0.89887	2.97826e-06	2.97826e-06	FDR<0.05	-0.158754	negligible	386.488	391.435	381.54	0.243127	-0.150812	0.974721	0.880124	0.999945	Not Sig	nonsignificant	.	Y	mitochondrial ribosomal protein L34 [Source:RGD Symbol;Acc:1359397]
Ndufb4	chr11	16394	10475	77.1555	80.6425	-3.48705	0.956759	3.1089e-06	3.1089e-06	FDR<0.05	-0.0571874	negligible	2998.16	2909.51	3086.8	0.200119	0.428138	1.06094	0.668551	0.999945	Not Sig	nonsignificant	.	.	NADH:ubiquinone oxidoreductase subunit B4 [Source:RGD Symbol;Acc:1307072]
Fbxw7	chr2	750	356	123.893	99.2166	24.6761	1.24871	3.16067e-06	3.16067e-06	FDR<0.05	0.298448	small	76.9905	63.1325	90.8486	0.420984	1.2001	1.43902	0.2301	0.999945	Not Sig	nonsignificant	.	.	F-box and WD repeat domain containing 7 [Source:RGD Symbol;Acc:2321145]
LOC100910017	chr5	11875	7675	70.3527	73.7124	-3.3597	0.954421	3.36495e-06	3.36495e-06	FDR<0.05	-0.0697534	negligible	2427.02	2395.07	2458.97	0.213292	0.182383	1.02668	0.855282	0.999945	Not Sig	nonsignificant	.	.	60S ribosomal protein L31-like [Source:RGD Symbol;Acc:6500827]
Camk2a	chr18	12252	7717	107.231	113.175	-5.94417	0.947478	3.45996e-06	3.45996e-06	FDR<0.05	-0.0710053	negligible	1104.68	1034.59	1174.77	0.211958	0.862222	1.1355	0.388566	0.999945	Not Sig	nonsignificant	.	.	calcium/calmodulin-dependent protein kinase II alpha [Source:RGD Symbol;Acc:2261]
Dusp14	chr10	799	434	112.156	92.5165	19.6395	1.21228	3.47288e-06	3.47288e-06	FDR<0.05	0.259853	small	96.2371	80.4396	112.035	0.358968	1.32289	1.39278	0.185871	0.999945	Not Sig	nonsignificant	.	.	dual specificity phosphatase 14 [Source:RGD Symbol;Acc:1307415]
Ciao2a	chr8	711	506	80.019	98.5781	-18.559	0.811733	3.5557e-06	3.5557e-06	FDR<0.05	-0.271461	small	149.926	154.855	144.996	0.327362	-0.273954	0.936334	0.78412	0.999945	Not Sig	nonsignificant	.	.	cytosolic iron-sulfur assembly component 2A [Source:RGD Symbol;Acc:1307481]
Thap11	chr19	286	290	79.8476	109.669	-29.8216	0.728077	3.74591e-06	3.74591e-06	FDR<0.05	-0.361653	small	52.3374	60.9321	43.7428	0.462448	-1.05152	0.717893	0.293022	0.999945	Not Sig	nonsignificant	.	.	THAP domain containing 11 [Source:RGD Symbol;Acc:1310268]
Ost4	chr6	5227	3361	80.9968	87.6062	-6.60935	0.924556	3.75546e-06	3.75546e-06	FDR<0.05	-0.0981808	negligible	974.114	955.975	992.254	0.214615	0.254428	1.03795	0.799165	0.999945	Not Sig	nonsignificant	.	Y
Rab36	chr20	585	420	111.995	140.607	-28.612	0.796511	3.99985e-06	3.99985e-06	FDR<0.05	-0.29023	small	100.022	106.783	93.2613	0.390273	-0.538717	0.873374	0.590082	0.999945	Not Sig	nonsignificant	.	.	RAB36, member RAS oncogene family [Source:RGD Symbol;Acc:1596098]
Rwdd2b	chr11	384	266	82.2373	112.747	-30.5101	0.729394	4.00001e-06	4.00001e-06	FDR<0.05	-0.362806	small	75.5776	79.6025	71.5527	0.402435	-0.417806	0.898874	0.676089	0.999945	Not Sig	nonsignificant	.	.	RWD domain containing 2B [Source:RGD Symbol;Acc:1305062]
Slc25a3	chr7	4811	1686	106.104	98.4274	7.67694	1.078	4.03121e-06	4.03121e-06	FDR<0.05	0.140088	negligible	637.485	463.56	811.41	1.00444	0.805166	1.75039	0.420724	0.999945	Not Sig	nonsignificant	.	.
Rps25	chr8	4888	3106	68.8747	74.9692	-6.09455	0.918706	4.08408e-06	4.08408e-06	FDR<0.05	-0.0989165	negligible	2350.01	2225.84	2474.19	0.220235	0.698228	1.11157	0.485035	0.999945	Not Sig	nonsignificant	.	.	ribosomal protein s25 [Source:RGD Symbol;Acc:621043]
Ddt	chr20	8144	5430	81.9358	87.4157	-5.47984	0.937313	4.13944e-06	4.13944e-06	FDR<0.05	-0.0726255	negligible	1491.55	1505.17	1477.94	0.215243	-0.11657	0.981912	0.907201	0.999945	Not Sig	nonsignificant	.	.	D-dopachrome tautomerase [Source:RGD Symbol;Acc:61923]
Fam166a	chr3	1255	653	95.7804	84.3946	11.3859	1.13491	4.19755e-06	4.19755e-06	FDR<0.05	0.213998	small	214.965	217.929	212.002	0.956737	-0.0388283	0.972803	0.969027	0.999945	Not Sig	nonsignificant	.	.	family with sequence similarity 166, member A [Source:RGD Symbol;Acc:1562762]
Cartpt	chr2	2324	612	98.5184	87.0745	11.4439	1.13143	4.20253e-06	4.20253e-06	FDR<0.05	0.222623	small	143.596	78.607	208.586	0.335711	4.16879	2.65352	3.06215e-05	0.00912913	FDR<0.05	upregulated	.	Y	CART prepropeptide [Source:RGD Symbol;Acc:2272]
Rtcb	chr7	2244	1484	96.2786	107.345	-11.0668	0.896905	4.22455e-06	4.22455e-06	FDR<0.05	-0.171658	negligible	437.133	425.633	448.634	0.245802	0.304814	1.05404	0.760508	0.999945	Not Sig	nonsignificant	.	.	RNA 2',3'-cyclic phosphate and 5'-OH ligase [Source:RGD Symbol;Acc:1303261]
Ssr2	chr2	3454	2509	80.2077	86.9481	-6.7404	0.922478	4.54618e-06	4.54618e-06	FDR<0.05	-0.126202	negligible	714.822	736.026	693.618	0.220974	-0.387379	0.942383	0.698476	0.999945	Not Sig	nonsignificant	.	.	signal sequence receptor subunit 2 [Source:RGD Symbol;Acc:1308365]
Sod1	chr11	15520	10576	81.4137	84.8764	-3.46277	0.959202	4.63136e-06	4.63136e-06	FDR<0.05	-0.0676357	negligible	2966.41	2989.41	2943.42	0.19944	-0.11327	0.984616	0.909816	0.999945	Not Sig	nonsignificant	.	.	superoxide dismutase 1 [Source:RGD Symbol;Acc:3731]
Atp5if1	chr5	22218	14000	76.4767	79.4536	-2.97693	0.962532	4.84519e-06	4.84519e-06	FDR<0.05	-0.0504904	negligible	4076.21	3979.93	4172.49	0.206493	0.33229	1.04838	0.73967	0.999945	Not Sig	nonsignificant	.	.	ATP synthase inhibitory factor subunit 1 [Source:RGD Symbol;Acc:2181]
Pcyox1	chr4	658	380	84.7977	103.172	-18.3747	0.821903	5.03103e-06	5.03103e-06	FDR<0.05	-0.259419	small	94.9907	82.4033	107.578	0.359472	1.07088	1.30551	0.284222	0.999945	Not Sig	nonsignificant	.	.	prenylcysteine oxidase 1 [Source:RGD Symbol;Acc:628652]
Wdr18	chr7	1932	1173	82.0391	93.2484	-11.2093	0.879791	5.13414e-06	5.13414e-06	FDR<0.05	-0.163482	negligible	367.361	363.365	371.358	0.245638	0.130455	1.022	0.896206	0.999945	Not Sig	nonsignificant	.	.	WD repeat domain 18 [Source:RGD Symbol;Acc:1310646]
Eno2	chr4	18164	12299	109.542	114.288	-4.74551	0.958478	5.38172e-06	5.38172e-06	FDR<0.05	-0.0510843	negligible	3636.65	3627.5	3645.79	0.21386	0.0306067	1.00504	0.975583	0.999945	Not Sig	nonsignificant	.	.	enolase 2 [Source:RGD Symbol;Acc:2554]
Mrpl20	chr5	4457	3060	86.894	94.5606	-7.66658	0.918924	5.43221e-06	5.43221e-06	FDR<0.05	-0.0895393	negligible	880.486	884.388	876.584	0.215573	-0.0576202	0.991176	0.954051	0.999945	Not Sig	nonsignificant	Y	.	mitochondrial ribosomal protein L20 [Source:RGD Symbol;Acc:1588219]
Ndufb9	chr7	17709	11761	75.5609	78.4652	-2.90432	0.962986	5.48805e-06	5.48805e-06	FDR<0.05	-0.065484	negligible	3472.01	3478.31	3465.7	0.199664	-0.0246636	0.996375	0.980323	0.999945	Not Sig	nonsignificant	.	.	NADH:ubiquinone oxidoreductase subunit B9 [Source:RGD Symbol;Acc:1307114]
Hmgcr	chr2	1719	427	139.42	115.304	24.1158	1.20915	5.49311e-06	5.49311e-06	FDR<0.05	0.216704	small	218.06	119.926	316.193	0.341568	4.09904	2.63657	4.14866e-05	0.011765	FDR<0.05	upregulated	.	Y	3-hydroxy-3-methylglutaryl-CoA reductase [Source:RGD Symbol;Acc:2803]
Ramp2	chr10	1293	779	71.3577	84.55	-13.1923	0.84397	5.88777e-06	5.88777e-06	FDR<0.05	-0.23159	small	239.043	227.675	250.412	0.285425	0.498825	1.09987	0.617903	0.999945	Not Sig	nonsignificant	.	Y
Mmd2	chr12	3638	2081	97.097	107.097	-9.99955	0.906631	5.89002e-06	5.89002e-06	FDR<0.05	-0.123521	negligible	604.751	565.301	644.201	0.227367	0.832636	1.13957	0.40505	0.999945	Not Sig	nonsignificant	.	.	monocyte to macrophage differentiation-associated 2 [Source:RGD Symbol;Acc:1306506]
Sft2d1	chr1	1494	952	106.374	121.683	-15.3089	0.87419	5.91501e-06	5.91501e-06	FDR<0.05	-0.176396	negligible	277.461	278.396	276.526	0.260799	-0.034253	0.993286	0.972675	0.999945	Not Sig	nonsignificant	Y	.	SFT2 domain containing 1 [Source:RGD Symbol;Acc:1359119]
Usp38	chr19	399	54	148.307	86.1576	62.1493	1.72135	5.98857e-06	5.98857e-06	FDR<0.05	0.66944	medium	39.3613	14.1133	64.6094	0.688386	3.245	4.57791	0.0011745	0.188069	Not Sig	nonsignificant	Y	Y	ubiquitin specific peptidase 38 [Source:RGD Symbol;Acc:1311974]
Serinc3	chr3	5432	3531	91.6631	99.0164	-7.35332	0.925736	5.99438e-06	5.99438e-06	FDR<0.05	-0.0945286	negligible	1120.52	1096.18	1144.86	0.223876	0.271671	1.04441	0.785875	0.999945	Not Sig	nonsignificant	.	.	serine incorporator 3 [Source:RGD Symbol;Acc:1308390]
Ak1	chr3	3124	1904	100.588	110.032	-9.4445	0.914166	6.18161e-06	6.18161e-06	FDR<0.05	-0.124449	negligible	353.417	324.299	382.535	0.253106	0.928087	1.17957	0.353362	0.999945	Not Sig	nonsignificant	.	.
Kcnd2	chr4	441	248	91.1913	118.925	-27.7337	0.766797	6.7135e-06	6.7135e-06	FDR<0.05	-0.297451	small	105.49	99.8669	111.114	0.37185	0.461171	1.11262	0.644676	0.999945	Not Sig	nonsignificant	Y	Y	potassium voltage-gated channel subfamily D member 2 [Source:RGD Symbol;Acc:68393]
Smim26	chr3	3541	2576	86.6023	94.8739	-8.27159	0.912815	6.77921e-06	6.77921e-06	FDR<0.05	-0.112936	negligible	597.632	628.694	566.57	0.227995	-0.65463	0.901187	0.512706	0.999945	Not Sig	nonsignificant	.	.	small integral membrane protein 26 [Source:RGD Symbol;Acc:1566320]
Hikeshi	chr1	2025	1210	80.4802	92.1246	-11.6443	0.873602	7.00711e-06	7.00711e-06	FDR<0.05	-0.190254	negligible	372.328	363.34	381.317	0.245395	0.281201	1.04948	0.778556	0.999945	Not Sig	nonsignificant	.	Y	heat shock protein nuclear import factor hikeshi [Source:RGD Symbol;Acc:1359455]
Timm10	chr3	2812	2009	91.0343	99.0072	-7.97282	0.919472	7.0174e-06	7.0174e-06	FDR<0.05	-0.123455	negligible	576.537	586.878	566.196	0.23022	-0.225464	0.96476	0.821618	0.999945	Not Sig	nonsignificant	.	.	translocase of inner mitochondrial membrane 10 [Source:RGD Symbol;Acc:621741]
Nudt2	chr5	1940	1393	86.4278	96.865	-10.4372	0.89225	7.04797e-06	7.04797e-06	FDR<0.05	-0.148442	negligible	391.624	405.369	377.88	0.251589	-0.419371	0.932189	0.674945	0.999945	Not Sig	nonsignificant	.	.	nudix hydrolase 2 [Source:RGD Symbol;Acc:1303023]
Trim2	chr2	1006	688	97.7368	117.023	-19.286	0.835195	7.18512e-06	7.18512e-06	FDR<0.05	-0.255401	small	61.3354	60.8285	61.8423	0.472672	-0.00386068	1.01667	0.99692	0.999945	Not Sig	nonsignificant	.	Y	tripartite motif-containing 2 [Source:RGD Symbol;Acc:1310981]
Snx17	chr6	1700	1139	89.2089	100.611	-11.4016	0.886676	7.28232e-06	7.28232e-06	FDR<0.05	-0.17887	negligible	326.359	318.854	333.864	0.263967	0.229811	1.04707	0.818238	0.999945	Not Sig	nonsignificant	.	.	sorting nexin 17 [Source:RGD Symbol;Acc:1306424]
Fkbp3	chr6	7791	5478	91.1345	97.4246	-6.29005	0.935437	7.32773e-06	7.32773e-06	FDR<0.05	-0.0728154	negligible	1533.32	1555.09	1511.54	0.213904	-0.197474	0.971996	0.843457	0.999945	Not Sig	nonsignificant	.	.	FKBP prolyl isomerase 3 [Source:RGD Symbol;Acc:1304992]
Tmub1	chr4	989	770	85.1254	99.4051	-14.2798	0.856348	7.43175e-06	7.43175e-06	FDR<0.05	-0.215137	small	201.035	213.826	188.243	0.287714	-0.655646	0.880359	0.512052	0.999945	Not Sig	nonsignificant	.	.	transmembrane and ubiquitin-like domain containing 1 [Source:RGD Symbol;Acc:735120]
Mapk3	chr1	1557	903	83.429	94.2211	-10.7922	0.885459	7.52809e-06	7.52809e-06	FDR<0.05	-0.177333	negligible	266.34	253.386	279.294	0.307358	0.485723	1.10224	0.627164	0.999945	Not Sig	nonsignificant	.	.	mitogen activated protein kinase 3 [Source:RGD Symbol;Acc:3046]
Cacybp	chr13	4490	2756	88.7706	98.01	-9.23932	0.905731	7.63878e-06	7.63878e-06	FDR<0.05	-0.106455	negligible	883.581	843.225	923.936	0.21633	0.611381	1.09572	0.540947	0.999945	Not Sig	nonsignificant	.	.	calcyclin binding protein [Source:RGD Symbol;Acc:1303146]
Per1	chr10	937	129	134.803	92.1697	42.6336	1.46256	7.72307e-06	7.72307e-06	FDR<0.05	0.419081	small	95.3135	35.2441	155.383	0.439718	4.93052	4.40876	8.20123e-07	0.000353169	FDR<0.05	upregulated	.	Y	period circadian regulator 1 [Source:RGD Symbol;Acc:727863]
Akr1b1	chr4	2306	1645	89.3821	100.617	-11.2352	0.888337	7.76285e-06	7.76285e-06	FDR<0.05	-0.141439	negligible	482.786	495.601	469.971	0.241895	-0.33006	0.948286	0.741355	0.999945	Not Sig	nonsignificant	.	.	aldo-keto reductase family 1 member B1 [Source:RGD Symbol;Acc:2092]
Gng2	chr15	4431	2802	98.8769	107.395	-8.51791	0.920686	7.76356e-06	7.76356e-06	FDR<0.05	-0.108338	negligible	216.234	205.762	226.707	0.299561	0.435435	1.10179	0.663247	0.999945	Not Sig	nonsignificant	.	.	G protein subunit gamma 2 [Source:RGD Symbol;Acc:69268]
Scn3b	chr8	2858	2112	114.233	127.757	-13.5247	0.894137	7.80522e-06	7.80522e-06	FDR<0.05	-0.118125	negligible	478.306	492.568	464.045	0.272036	-0.338604	0.942093	0.734908	0.999945	Not Sig	nonsignificant	.	.	sodium voltage-gated channel beta subunit 3 [Source:RGD Symbol;Acc:621657]
Sprn	chr1	497	395	85.7879	109.58	-23.7926	0.782875	7.84021e-06	7.84021e-06	FDR<0.05	-0.287733	small	34.6911	40.9004	28.4818	0.535077	-0.968857	0.696369	0.332616	0.999945	Not Sig	nonsignificant	.	.	shadow of prion protein [Source:RGD Symbol;Acc:1561845]
LOC361985	chr2	1601	1123	82.9933	95.3407	-12.3474	0.870492	8.05357e-06	8.05357e-06	FDR<0.05	-0.184871	negligible	323.126	334.225	312.027	0.275929	-0.382508	0.933582	0.702085	0.999945	Not Sig	nonsignificant	.	Y
Rbx1	chr7	7242	4937	81.3901	87.1588	-5.76871	0.933814	8.05613e-06	8.05613e-06	FDR<0.05	-0.0942262	negligible	916.319	940.297	892.341	0.221622	-0.34822	0.948998	0.727675	0.999945	Not Sig	nonsignificant	.	.	ring-box 1 [Source:RGD Symbol;Acc:1308453]
Bola1	chr2	1338	832	69.6921	80.4489	-10.7568	0.86629	8.0858e-06	8.0858e-06	FDR<0.05	-0.212508	small	257.399	249.774	265.024	0.27631	0.332405	1.06106	0.739583	0.999945	Not Sig	nonsignificant	.	.	bolA family member 1 [Source:RGD Symbol;Acc:1310586]
Smpd2	chr20	599	425	89.4599	108.276	-18.816	0.826222	8.13699e-06	8.13699e-06	FDR<0.05	-0.300406	small	108.825	115.997	101.653	0.361965	-0.487164	0.876346	0.626142	0.999945	Not Sig	nonsignificant	.	.	sphingomyelin phosphodiesterase 2 [Source:RGD Symbol;Acc:619753]
Ndufa12	chr7	5958	3826	83.0036	88.5341	-5.53049	0.937533	8.17937e-06	8.17937e-06	FDR<0.05	-0.0913941	negligible	1069	1026.31	1111.69	0.217494	0.537039	1.08319	0.59124	0.999945	Not Sig	nonsignificant	.	.	NADH:ubiquinone oxidoreductase subunit A12 [Source:RGD Symbol;Acc:1311462]
LOC100360117	chr3	5834	3838	69.9929	75.15	-5.15715	0.931375	8.29076e-06	8.29076e-06	FDR<0.05	-0.101398	negligible	3368.24	3314.4	3422.07	0.200769	0.231073	1.03249	0.817258	0.999945	Not Sig	nonsignificant	.	.
Tmem101	chr10	603	514	87.1886	102.755	-15.5663	0.84851	8.31095e-06	8.31095e-06	FDR<0.05	-0.274594	small	136.635	153.443	119.827	0.320447	-1.12898	0.78092	0.258908	0.999945	Not Sig	nonsignificant	.	.	transmembrane protein 101 [Source:RGD Symbol;Acc:1306490]
LOC120101764	chr3	3332	2244	95.8909	105.503	-9.61242	0.90889	8.60248e-06	8.60248e-06	FDR<0.05	-0.109037	negligible	49.2082	51.636	46.7803	0.467706	-0.295675	0.905963	0.767478	0.999945	Not Sig	nonsignificant	.	.
Dclk1	chr2	2095	996	130.889	119.427	11.4625	1.09598	8.62746e-06	8.62746e-06	FDR<0.05	0.186129	negligible	128.882	101.389	156.376	0.343849	1.77334	1.54234	0.0761726	0.999945	Not Sig	nonsignificant	.	Y	doublecortin-like kinase 1 [Source:RGD Symbol;Acc:68437]
Brk1	chr4	12010	8351	101.092	105.958	-4.8667	0.95407	8.65575e-06	8.65575e-06	FDR<0.05	-0.0589757	negligible	2375.63	2439.43	2311.82	0.202946	-0.384107	0.947691	0.700899	0.999945	Not Sig	nonsignificant	.	.	BRICK1 subunit of SCAR/WAVE actin nucleating complex [Source:RGD Symbol;Acc:1598136]
Rpl36al	chr6	7190	4765	67.4132	71.6672	-4.25402	0.940642	8.7464e-06	8.7464e-06	FDR<0.05	-0.0892211	negligible	1378.25	1341.52	1414.98	0.211298	0.368056	1.05476	0.712831	0.999945	Not Sig	nonsignificant	.	.	ribosomal protein L36A-like [Source:RGD Symbol;Acc:621156]
Srp9	chr13	5634	3913	89.6357	95.724	-6.08825	0.936398	8.79016e-06	8.79016e-06	FDR<0.05	-0.0859978	negligible	136.843	147.734	125.953	0.319897	-0.714171	0.852563	0.475122	0.999945	Not Sig	nonsignificant	.	.	signal recognition particle 9 [Source:RGD Symbol;Acc:1597343]
Ccdc12	chr8	1112	868	83.7998	99.4138	-15.614	0.842939	8.80444e-06	8.80444e-06	FDR<0.05	-0.196007	negligible	242.648	262.397	222.899	0.269327	-0.872991	0.849472	0.382668	0.999945	Not Sig	nonsignificant	.	.	coiled-coil domain containing 12 [Source:RGD Symbol;Acc:1306081]
B4gat1	chr1	890	364	93.6252	115.851	-22.2257	0.808153	8.83285e-06	8.83285e-06	FDR<0.05	-0.28535	small	117.051	90.5433	143.558	1.01684	0.6602	1.58552	0.509125	0.999945	Not Sig	nonsignificant	.	.	beta-1,4-glucuronyltransferase 1 [Source:RGD Symbol;Acc:1309541]
Tomm20	chr19	1241	399	119.369	104.813	14.5558	1.13887	8.8741e-06	8.8741e-06	FDR<0.05	0.284483	small	148.212	117.984	178.441	1.13676	0.528713	1.51242	0.597004	0.999945	Not Sig	nonsignificant	.	.	translocase of outer mitochondrial membrane 20 [Source:RGD Symbol;Acc:708467]
Emc3	chr4	2545	1909	99.3358	109.024	-9.68858	0.911134	9.25811e-06	9.25811e-06	FDR<0.05	-0.15033	negligible	509.856	516.63	503.082	0.26302	-0.165146	0.973775	0.868829	0.999945	Not Sig	nonsignificant	.	.	ER membrane protein complex subunit 3 [Source:RGD Symbol;Acc:1311566]
Commd8	chr14	1621	1258	96.4332	108.446	-12.0132	0.889224	9.3275e-06	9.3275e-06	FDR<0.05	-0.170841	negligible	350.794	364.415	337.172	0.262403	-0.445311	0.925242	0.656095	0.999945	Not Sig	nonsignificant	.	Y	COMM domain containing 8 [Source:RGD Symbol;Acc:1305402]
Ccdc124	chr16	2316	1248	91.232	100.038	-8.80635	0.91197	9.67078e-06	9.67078e-06	FDR<0.05	-0.167712	negligible	406.806	393.577	420.035	0.291128	0.347307	1.06723	0.728361	0.999945	Not Sig	nonsignificant	.	.	coiled-coil domain containing 124 [Source:RGD Symbol;Acc:1310931]
Slc7a6os	chr19	1368	980	88.4769	102.441	-13.9641	0.863686	9.76833e-06	9.76833e-06	FDR<0.05	-0.172805	negligible	281.563	281.723	281.403	0.277123	-0.0195603	0.998867	0.984394	0.999945	Not Sig	nonsignificant	.	.	solute carrier family 7, member 6 opposite strand [Source:RGD Symbol;Acc:708394]
Elp5	chr10	1587	707	126.247	108.831	17.4164	1.16003	9.98176e-06	9.98176e-06	FDR<0.05	0.184703	negligible	243.189	197.225	289.154	0.316222	1.73497	1.46612	0.0827462	0.999945	Not Sig	nonsignificant	.	.	elongator acetyltransferase complex subunit 5 [Source:RGD Symbol;Acc:1303303]
Snrpd2	chr1	6496	4320	78.4335	83.3823	-4.94875	0.94065	9.98914e-06	9.98914e-06	FDR<0.05	-0.0956653	negligible	1151.98	1138.93	1165.03	0.21108	0.157413	1.02292	0.874919	0.999945	Not Sig	nonsignificant	.	.	small nuclear ribonucleoprotein D2 polypeptide [Source:RGD Symbol;Acc:1593018]
Rpl21	chr12	37499	23193	66.4497	68.3039	-1.85424	0.972853	1.00053e-05	1.00053e-05	FDR<0.05	-0.0331843	negligible	820.231	786.381	854.08	0.220553	0.53746	1.08609	0.59095	0.999945	Not Sig	nonsignificant	.	Y	ribosomal protein L21 [Source:RGD Symbol;Acc:68390]
Sra1	chr18	1919	1447	84.239	95.0674	-10.8284	0.886097	1.01575e-05	1.01575e-05	FDR<0.05	-0.139317	negligible	392.592	406.806	378.379	0.242359	-0.432824	0.93012	0.665143	0.999945	Not Sig	nonsignificant	.	.	steroid receptor RNA activator 1 [Source:RGD Symbol;Acc:621148]
Commd10	chr18	1507	981	94.9782	109.976	-14.9982	0.863623	1.02409e-05	1.02409e-05	FDR<0.05	-0.173666	negligible	312.563	302.591	322.535	0.255949	0.352022	1.06591	0.724822	0.999945	Not Sig	nonsignificant	.	Y	COMM domain containing 10 [Source:RGD Symbol;Acc:1303015]
Lmo2	chr3	149	92	66.6289	109.28	-42.6507	0.609711	1.05773e-05	1.05773e-05	FDR<0.05	-0.520329	medium	22.633	21.3401	23.9259	0.675306	0.292433	1.12117	0.769955	0.999945	Not Sig	nonsignificant	.	.	LIM domain only 2 [Source:RGD Symbol;Acc:1307101]
Tmem109	chr1	655	538	77.3551	92.7453	-15.3902	0.83406	1.06217e-05	1.06217e-05	FDR<0.05	-0.244219	small	140.39	155.8	124.98	0.330347	-0.98251	0.80218	0.325849	0.999945	Not Sig	nonsignificant	.	.	transmembrane protein 109 [Source:RGD Symbol;Acc:1359538]
Lsm5	chr4	1620	1121	84.5838	95.7133	-11.1295	0.88372	1.06669e-05	1.06669e-05	FDR<0.05	-0.185855	negligible	232.061	227.753	236.369	0.281296	0.211457	1.03783	0.832531	0.999945	Not Sig	nonsignificant	.	.	LSM5 homolog, U6 small nuclear RNA and mRNA degradation associated [Source:RGD Symbol;Acc:1308655]
Trappc5	chr12	1317	855	86.4019	99.0233	-12.6214	0.872541	1.11535e-05	1.11535e-05	FDR<0.05	-0.181722	negligible	176.348	177.375	175.321	0.297191	-0.0495429	0.988422	0.960487	0.999945	Not Sig	nonsignificant	.	.	trafficking protein particle complex subunit 5 [Source:RGD Symbol;Acc:1563971]
Diablo	chr12	1309	927	80.8779	92.4687	-11.5908	0.874652	1.12876e-05	1.12876e-05	FDR<0.05	-0.197504	negligible	250.303	256.77	243.837	0.282695	-0.290244	0.949632	0.771629	0.999945	Not Sig	nonsignificant	.	.	diablo, IAP-binding mitochondrial protein [Source:RGD Symbol;Acc:1310885]
Atp5pb	chr2	15152	10335	99.5007	103.818	-4.31736	0.958414	1.14152e-05	1.14152e-05	FDR<0.05	-0.0660918	negligible	3087.7	3100.02	3075.39	0.202762	-0.0586911	0.992056	0.953198	0.999945	Not Sig	nonsignificant	.	.	ATP synthase peripheral stalk-membrane subunit b [Source:RGD Symbol;Acc:620041]
Gpi	chr1	16903	11492	108.986	113.872	-4.88629	0.95709	1.15174e-05	1.15174e-05	FDR<0.05	-0.0393757	negligible	3388.11	3409.98	3366.24	0.206809	-0.093051	0.987173	0.925863	0.999945	Not Sig	nonsignificant	.	.	glucose-6-phosphate isomerase [Source:RGD Symbol;Acc:2727]
Alkbh7	chr9	2441	1617	95.3448	106.024	-10.679	0.899277	1.17551e-05	1.17551e-05	FDR<0.05	-0.125783	negligible	428.108	417.489	438.727	0.23923	0.300533	1.05087	0.763771	0.999945	Not Sig	nonsignificant	.	.	alkB homolog 7 [Source:RGD Symbol;Acc:1598126]
Wdr77	chr2	1725	1290	98.8296	111.457	-12.6272	0.886708	1.18155e-05	1.18155e-05	FDR<0.05	-0.165436	negligible	369.579	393.27	345.888	0.247644	-0.757472	0.879519	0.448767	0.999945	Not Sig	nonsignificant	.	Y	WD repeat domain 77 [Source:RGD Symbol;Acc:1310479]
Slc6a17	chr2	1055	592	129.722	114.702	15.0206	1.13095	1.18205e-05	1.18205e-05	FDR<0.05	0.242442	small	25.5315	22.2828	28.7802	0.63193	0.622622	1.29159	0.533533	0.999945	Not Sig	nonsignificant	.	Y	solute carrier family 6 member 17 [Source:RGD Symbol;Acc:1587185]
Prdx6	chr13	8122	5867	79.6923	83.8853	-4.19299	0.950015	1.18926e-05	1.18926e-05	FDR<0.05	-0.0762926	negligible	704.313	683.815	724.812	0.22428	0.370445	1.05995	0.711051	0.999945	Not Sig	nonsignificant	.	.	peroxiredoxin 6 [Source:RGD Symbol;Acc:71005]
Bmerb1	chr10	6869	4276	101.939	109.103	-7.16367	0.93434	1.20017e-05	1.20017e-05	FDR<0.05	-0.0809409	negligible	1325.57	1260.94	1390.2	0.224761	0.617437	1.10251	0.536947	0.999945	Not Sig	nonsignificant	.	.	bMERB domain containing 1 [Source:RGD Symbol;Acc:1305733]
Hnrnpd	chr14	921	396	112.037	90.3571	21.6802	1.23994	1.25469e-05	1.25469e-05	FDR<0.05	0.236383	small	95.3294	82.4795	108.179	0.929515	0.428257	1.31159	0.668464	0.999945	Not Sig	nonsignificant	.	Y	heterogeneous nuclear ribonucleoprotein D [Source:RGD Symbol;Acc:620365]
Rtn1	chr6	9489	5917	106.176	112.466	-6.2906	0.944067	1.26579e-05	1.26579e-05	FDR<0.05	-0.0778152	negligible	1664.54	1644.31	1684.76	0.225138	0.162082	1.0246	0.871241	0.999945	Not Sig	nonsignificant	.	Y	reticulon 1 [Source:RGD Symbol;Acc:620986]
Mrpl18	chr1	2120	1506	74.4543	83.1898	-8.73551	0.894993	1.28278e-05	1.28278e-05	FDR<0.05	-0.134809	negligible	428.419	433.671	423.167	0.23888	-0.149401	0.975777	0.881237	0.999945	Not Sig	nonsignificant	.	.	mitochondrial ribosomal protein L18 [Source:RGD Symbol;Acc:1306387]
Pfkp	chr17	3901	2644	114.606	123.876	-9.26941	0.925172	1.29112e-05	1.29112e-05	FDR<0.05	-0.104928	negligible	807.939	819.587	796.29	0.228706	-0.192874	0.971575	0.847058	0.999945	Not Sig	nonsignificant	.	Y	phosphofructokinase, platelet [Source:RGD Symbol;Acc:61893]
Tecr	chr19	26536	18840	86.6416	89.604	-2.9624	0.966939	1.33678e-05	1.33678e-05	FDR<0.05	-0.0351558	negligible	4557.89	4627.11	4488.67	0.210503	-0.21085	0.970081	0.833004	0.999945	Not Sig	nonsignificant	.	.	trans-2,3-enoyl-CoA reductase [Source:RGD Symbol;Acc:620376]
Odc1	chr6	576	240	124.169	105.684	18.4846	1.1749	1.36455e-05	1.36455e-05	FDR<0.05	0.321598	small	68.2498	59.0193	77.4803	0.489501	0.846756	1.3128	0.397131	0.999945	Not Sig	nonsignificant	.	.	ornithine decarboxylase 1 [Source:RGD Symbol;Acc:3227]
Lage3	chrX	3799	2505	95.5101	104.008	-8.49767	0.918298	1.37241e-05	1.37241e-05	FDR<0.05	-0.0932858	negligible	541.207	509.345	573.07	0.229707	0.742496	1.12511	0.457787	0.999945	Not Sig	nonsignificant	.	.	L antigen family, member 3 [Source:RGD Symbol;Acc:1562476]
Vta1	chr1	3215	2248	93.996	102.139	-8.14261	0.920279	1.37488e-05	1.37488e-05	FDR<0.05	-0.101579	negligible	685.412	698.767	672.056	0.226552	-0.254563	0.961774	0.799061	0.999945	Not Sig	nonsignificant	.	.	vesicle trafficking 1 [Source:RGD Symbol;Acc:1305031]
Ccdc32	chr3	2012	1497	89.2056	99.5234	-10.3178	0.896328	1.38308e-05	1.38308e-05	FDR<0.05	-0.17628	negligible	388.98	410.739	367.221	0.285702	-0.589756	0.89405	0.555354	0.999945	Not Sig	nonsignificant	Y	.	coiled-coil domain containing 32 [Source:RGD Symbol;Acc:1307516]
Cnih3	chr13	121	83	70.2402	111.957	-41.717	0.627384	1.39512e-05	1.39512e-05	FDR<0.05	-0.54349	medium	20.676	22.7542	18.5978	0.682652	-0.395461	0.817336	0.692503	0.999945	Not Sig	nonsignificant	.	.	cornichon family AMPA receptor auxiliary protein 3 [Source:RGD Symbol;Acc:1582859]
Rpl31	chr9	12399	7328	67.4182	70.8133	-3.39514	0.952055	1.40769e-05	1.40769e-05	FDR<0.05	-0.0663189	negligible	1212.98	1116.14	1309.82	0.224528	1.03458	1.17352	0.300867	0.999945	Not Sig	nonsignificant	.	.	ribosomal protein L31 [Source:RGD Symbol;Acc:621202]
Mtch1	chr20	2842	1896	92.1863	101.599	-9.41237	0.907357	1.42507e-05	1.42507e-05	FDR<0.05	-0.114958	negligible	517.384	532.247	502.521	0.314806	-0.245077	0.944151	0.806397	0.999945	Not Sig	nonsignificant	.	.	mitochondrial carrier 1 [Source:RGD Symbol;Acc:1309262]
Mif	chr20	27448	18510	94.6865	97.4067	-2.72025	0.972073	1.45061e-05	1.45061e-05	FDR<0.05	-0.0367824	negligible	5267.22	5289.89	5244.55	0.196554	-0.062894	0.99143	0.949851	0.999945	Not Sig	nonsignificant	.	.	macrophage migration inhibitory factor [Source:RGD Symbol;Acc:621163]
Tstd3	chr5	1868	1369	88.0756	98.783	-10.7074	0.891607	1.46994e-05	1.46994e-05	FDR<0.05	-0.155956	negligible	378.665	403.327	354.003	0.259018	-0.746039	0.877708	0.455644	0.999945	Not Sig	nonsignificant	.	.	thiosulfate sulfurtransferase like domain containing 3 [Source:RGD Symbol;Acc:1563572]
Nrgn	chr8	10860	6109	89.5067	94.1668	-4.66006	0.950513	1.51013e-05	1.51013e-05	FDR<0.05	-0.0619849	negligible	1014.65	945.969	1083.33	0.225168	0.878214	1.14521	0.379827	0.999945	Not Sig	nonsignificant	.	.	neurogranin [Source:RGD Symbol;Acc:61833]
Cpne6	chr15	8445	5259	117.866	125.51	-7.64449	0.939093	1.54797e-05	1.54797e-05	FDR<0.05	-0.062218	negligible	1566.98	1504.57	1629.38	0.205561	0.559643	1.08295	0.575723	0.999945	Not Sig	nonsignificant	.	.	copine 6 [Source:RGD Symbol;Acc:1583895]
Got1	chr1	7318	5067	113.558	120.316	-6.7573	0.943837	1.57795e-05	1.57795e-05	FDR<0.05	-0.082952	negligible	1479.11	1479.42	1478.81	0.215665	-0.00936682	0.999585	0.992526	0.999945	Not Sig	nonsignificant	.	.	glutamic-oxaloacetic transaminase 1 [Source:RGD Symbol;Acc:2721]
Ptrhd1	chr6	668	418	87.0582	105.949	-18.8907	0.8217	1.63261e-05	1.63261e-05	FDR<0.05	-0.271968	small	39.998	33.4644	46.5316	0.510956	0.903454	1.39048	0.366285	0.999945	Not Sig	nonsignificant	.	.	peptidyl-tRNA hydrolase domain containing 1 [Source:RGD Symbol;Acc:1561792]
Etf1	chr18	671	254	109.532	92.4198	17.112	1.18515	1.64311e-05	1.64311e-05	FDR<0.05	0.329657	small	73.297	45.5612	101.033	0.456186	2.53926	2.21752	0.0111087	0.999945	Not Sig	nonsignificant	.	Y	eukaryotic translation termination factor 1 [Source:RGD Symbol;Acc:1305712]
LOC108352650	chr13	3579	1936	28.3976	31.5639	-3.16637	0.899684	1.67173e-05	1.67173e-05	FDR<0.05	-0.138383	negligible	577.268	534.084	620.453	0.2589	0.854127	1.16171	0.393035	0.999945	Not Sig	nonsignificant	.	.
Aplp1	chr1	5263	3167	89.7518	96.7415	-6.98973	0.927748	1.70453e-05	1.70453e-05	FDR<0.05	-0.107148	negligible	837.024	845.2	828.848	0.317396	-0.0767716	0.980653	0.938805	0.999945	Not Sig	nonsignificant	.	.	amyloid beta precursor like protein 1 [Source:RGD Symbol;Acc:69257]
Tbc1d17	chr1	718	478	100.985	121.739	-20.7547	0.829516	1.70811e-05	1.70811e-05	FDR<0.05	-0.235213	small	139.642	145.639	133.645	0.315096	-0.394261	0.91764	0.693388	0.999945	Not Sig	nonsignificant	.	.	TBC1 domain family, member 17 [Source:RGD Symbol;Acc:1309686]
Tmem50a	chr5	6890	4877	97.6078	104.072	-6.4646	0.937884	1.73143e-05	1.73143e-05	FDR<0.05	-0.0737523	negligible	1418.59	1476.59	1360.6	0.209798	-0.566715	0.921447	0.570908	0.999945	Not Sig	nonsignificant	.	Y	transmembrane protein 50A [Source:RGD Symbol;Acc:1305638]
Ppp3ca	chr2	4136	2441	92.3329	102.625	-10.2921	0.899711	1.74886e-05	1.74886e-05	FDR<0.05	-0.1094	negligible	481.719	460.818	502.619	0.291228	0.451026	1.09071	0.651971	0.999945	Not Sig	nonsignificant	.	Y	protein phosphatase 3 catalytic subunit alpha [Source:RGD Symbol;Acc:3382]
Mrps11	chr1	1414	958	94.4061	107.543	-13.1369	0.877845	1.77055e-05	1.77055e-05	FDR<0.05	-0.14616	negligible	277.08	284.13	270.029	0.261701	-0.277313	0.950371	0.781539	0.999945	Not Sig	nonsignificant	.	.	mitochondrial ribosomal protein S11 [Source:RGD Symbol;Acc:1559901]
Desi1	chr7	376	178	127.099	95.443	31.6562	1.33168	1.77595e-05	1.77595e-05	FDR<0.05	0.416083	small	34.3156	26.1319	42.4993	0.584245	1.25085	1.62634	0.210988	0.999945	Not Sig	nonsignificant	.	.	desumoylating isopeptidase 1 [Source:RGD Symbol;Acc:1305776]
Rpn1	chr4	3148	1328	86.5831	96.2685	-9.68539	0.899392	1.7813e-05	1.7813e-05	FDR<0.05	-0.155997	negligible	531.609	438.529	624.689	0.661921	0.774627	1.42451	0.43856	0.999945	Not Sig	nonsignificant	.	Y	ribophorin I [Source:RGD Symbol;Acc:3594]
Oscp1	chr5	425	332	85.281	108.685	-23.4042	0.784661	1.7862e-05	1.7862e-05	FDR<0.05	-0.289604	small	70.9397	76.7998	65.0797	0.398097	-0.601485	0.847394	0.547517	0.999945	Not Sig	nonsignificant	.	.	organic solute carrier partner 1 [Source:RGD Symbol;Acc:1306596]
Stmn1	chr5	7436	5048	94.2788	99.8386	-5.55974	0.944313	1.80655e-05	1.80655e-05	FDR<0.05	-0.0721674	negligible	1403.85	1406.59	1401.11	0.207218	-0.0283394	0.996101	0.977391	0.999945	Not Sig	nonsignificant	.	.	stathmin 1 [Source:RGD Symbol;Acc:2992]
Gatc	chr12	793	445	68.9592	85.5334	-16.5742	0.806225	1.82864e-05	1.82864e-05	FDR<0.05	-0.241927	small	64.4726	59.3342	69.6111	0.419044	0.572513	1.1732	0.566975	0.999945	Not Sig	nonsignificant	.	.	glutamyl-tRNA amidotransferase subunit C [Source:RGD Symbol;Acc:1309698]
Dusp3	chr10	1323	916	103.583	119.02	-15.437	0.8703	1.85387e-05	1.85387e-05	FDR<0.05	-0.136072	negligible	218.338	215.371	221.305	0.283655	0.116958	1.02756	0.906893	0.999945	Not Sig	nonsignificant	.	.	dual specificity phosphatase 3 [Source:RGD Symbol;Acc:1560049]
Smarca2	chr1	885	558	93.9055	107.996	-14.0906	0.869527	1.86384e-05	1.86384e-05	FDR<0.05	-0.26492	small	164.586	158.182	170.99	0.300706	0.36916	1.08097	0.712008	0.999945	Not Sig	nonsignificant	Y	.	SWI/SNF related, matrix associated, actin dependent regulator of chromatin, subfamily a, member 2 [Source:RGD Symbol;Acc:1302988]
Mea1	chr9	4420	3167	88.2101	94.8448	-6.63466	0.930047	1.8976e-05	1.8976e-05	FDR<0.05	-0.108889	negligible	896.32	941.078	851.563	0.215088	-0.668896	0.904881	0.503562	0.999945	Not Sig	nonsignificant	.	.	male-enhanced antigen 1 [Source:RGD Symbol;Acc:1597751]
Nabp2	chr7	2146	1317	93.7759	105.019	-11.2432	0.892941	1.89997e-05	1.89997e-05	FDR<0.05	-0.120272	negligible	406.519	385.413	427.624	0.241033	0.620296	1.10952	0.535063	0.999945	Not Sig	nonsignificant	.	.	nucleic acid binding protein 2 [Source:RGD Symbol;Acc:1308158]
Syt17	chr1	860	608	92.3428	110.234	-17.891	0.8377	1.9034e-05	1.9034e-05	FDR<0.05	-0.218412	small	174.01	177.455	170.564	0.319463	-0.199994	0.96117	0.841485	0.999945	Not Sig	nonsignificant	.	.	synaptotagmin 17 [Source:RGD Symbol;Acc:708576]
Trappc6b	chr6	591	271	94.0777	118.092	-24.0142	0.796648	1.91269e-05	1.91269e-05	FDR<0.05	-0.343856	small	77.9198	59.4378	96.4018	0.47901	1.51675	1.62189	0.12933	0.999945	Not Sig	nonsignificant	.	.	trafficking protein particle complex subunit 6B [Source:RGD Symbol;Acc:1309325]
Hint1	chr10	19678	12105	91.2727	94.424	-3.1513	0.966626	1.92951e-05	1.92951e-05	FDR<0.05	-0.0529723	negligible	919.911	853.055	986.768	0.309514	0.691551	1.15675	0.48922	0.999945	Not Sig	nonsignificant	.	.
Naa60	chr10	1473	889	97.4501	111.679	-14.2291	0.872589	1.95806e-05	1.95806e-05	FDR<0.05	-0.177363	negligible	255.837	234.8	276.874	0.276968	0.835632	1.17919	0.403362	0.999945	Not Sig	nonsignificant	Y	.	N(alpha)-acetyltransferase 60, NatF catalytic subunit [Source:RGD Symbol;Acc:1308915]
Btbd3	chr3	1318	592	97.2696	83.5395	13.7301	1.16436	2.035e-05	2.035e-05	FDR<0.05	0.234021	small	132.318	101.885	162.75	0.334106	2.00255	1.59739	0.0452261	0.999945	Not Sig	nonsignificant	.	Y	BTB domain containing 3 [Source:RGD Symbol;Acc:1311623]
Tmem9	chr13	3575	2544	93.1446	101.689	-8.54469	0.915973	2.04546e-05	2.04546e-05	FDR<0.05	-0.105936	negligible	736.026	749.306	722.746	0.229173	-0.23761	0.964553	0.812183	0.999945	Not Sig	nonsignificant	.	.	transmembrane protein 9 [Source:RGD Symbol;Acc:1307922]
Rps3a	chr2	7979	4966	70.8012	75.2151	-4.41388	0.941317	2.06809e-05	2.06809e-05	FDR<0.05	-0.0771903	negligible	1568.94	1487.03	1650.84	0.205216	0.735008	1.11016	0.462334	0.999945	Not Sig	nonsignificant	.	.	ribosomal protein S3a [Source:RGD Symbol;Acc:62078]
Psmc5	chr10	8449	5859	65.823	69.8958	-4.07279	0.941731	2.07388e-05	2.07388e-05	FDR<0.05	-0.0873509	negligible	1691.91	1722.7	1661.12	0.209241	-0.255404	0.964256	0.798411	0.999945	Not Sig	nonsignificant	.	.	proteasome 26S subunit, ATPase 5 [Source:RGD Symbol;Acc:708376]
Sdcbp	chr5	9649	5661	107.247	114.495	-7.24815	0.936695	2.076e-05	2.076e-05	FDR<0.05	-0.0654856	negligible	1770.99	1661.33	1880.66	0.217668	0.815067	1.13202	0.415034	0.999945	Not Sig	nonsignificant	.	.	syndecan binding protein [Source:RGD Symbol;Acc:621497]
Idh3b	chr3	5607	3830	99.424	107.049	-7.62459	0.928774	2.10003e-05	2.10003e-05	FDR<0.05	-0.0870475	negligible	1142.43	1135.51	1149.35	0.227408	0.0671089	1.01219	0.946495	0.999945	Not Sig	nonsignificant	.	.	isocitrate dehydrogenase (NAD(+)) 3 non-catalytic subunit beta [Source:RGD Symbol;Acc:621881]
Mrpl22	chr10	945	844	79.8147	93.2027	-13.388	0.856356	2.11681e-05	2.11681e-05	FDR<0.05	-0.212059	small	210.633	237.208	184.059	0.285917	-1.28739	0.775941	0.197959	0.999945	Not Sig	nonsignificant	.	.	mitochondrial ribosomal protein L22 [Source:RGD Symbol;Acc:1309277]
Txndc17	chr10	1451	1096	81.5068	93.0566	-11.5498	0.875884	2.15559e-05	2.15559e-05	FDR<0.05	-0.147675	negligible	21.4782	21.4458	21.5106	0.683035	-0.0390336	1.00302	0.968864	0.999945	Not Sig	nonsignificant	.	.
Blzf1	chr13	277	249	54.586	76.8757	-22.2897	0.710056	2.19049e-05	2.19049e-05	FDR<0.05	-0.377678	small	61.0763	73.0818	49.0709	0.426006	-1.36036	0.671452	0.173715	0.999945	Not Sig	nonsignificant	.	.	basic leucine zipper nuclear factor 1 [Source:RGD Symbol;Acc:1562452]
Pdxp	chr7	688	472	90.2544	105.84	-15.5859	0.852741	2.21141e-05	2.21141e-05	FDR<0.05	-0.274041	small	85.3586	91.6445	79.0728	0.430923	-0.445598	0.86282	0.655888	0.999945	Not Sig	nonsignificant	.	.	pyridoxal phosphatase [Source:RGD Symbol;Acc:1586212]
LOC100363869	chr14	9515	6665	66.9336	70.1404	-3.20682	0.95428	2.24922e-05	2.24922e-05	FDR<0.05	-0.0734127	negligible	3619.16	3611.24	3627.07	0.210058	0.033192	1.00438	0.973522	0.999945	Not Sig	nonsignificant	.	.
Psmc4	chr1	3192	2235	91.1519	100.494	-9.34202	0.907039	2.27888e-05	2.27888e-05	FDR<0.05	-0.116201	negligible	670.68	690.915	650.444	0.239564	-0.375899	0.941425	0.706992	0.999945	Not Sig	nonsignificant	.	.	proteasome 26S subunit, ATPase 4 [Source:RGD Symbol;Acc:621102]
Tmem231	chr19	271	256	85.6442	116.971	-31.3265	0.732185	2.30336e-05	2.30336e-05	FDR<0.05	-0.346977	small	60.6468	68.29	53.0037	0.461221	-0.809042	0.776157	0.418491	0.999945	Not Sig	nonsignificant	.	.	transmembrane protein 231 [Source:RGD Symbol;Acc:1306153]
Otub1	chr1	8535	5756	104.41	109.217	-4.80731	0.955984	2.30435e-05	2.30435e-05	FDR<0.05	-0.0643111	negligible	1237.26	1229.54	1244.97	0.227584	0.0696026	1.01255	0.94451	0.999945	Not Sig	nonsignificant	.	.	OTU deubiquitinase, ubiquitin aldehyde binding 1 [Source:RGD Symbol;Acc:1311329]
Coro1a	chr1	3848	2533	86.2969	96.3804	-10.0834	0.895379	2.3537e-05	2.3537e-05	FDR<0.05	-0.0811057	negligible	755.687	752.003	759.371	0.226518	0.0519832	1.0098	0.958542	0.999945	Not Sig	nonsignificant	.	.	coronin 1A [Source:RGD Symbol;Acc:620009]
Rnf5	chr20	1531	1032	87.2247	97.8856	-10.6609	0.891088	2.40131e-05	2.40131e-05	FDR<0.05	-0.189883	negligible	285.902	288.057	283.746	0.259564	-0.0776845	0.985034	0.938079	0.999945	Not Sig	nonsignificant	.	.	ring finger protein 5 [Source:RGD Symbol;Acc:1588458]
Paxx	chr3	3586	2541	107.778	114.892	-7.11398	0.938081	2.40949e-05	2.40949e-05	FDR<0.05	-0.107111	negligible	732.309	741.944	722.673	0.220039	-0.173728	0.974026	0.862079	0.999945	Not Sig	nonsignificant	.	.	PAXX, non-homologous end joining factor [Source:RGD Symbol;Acc:1306215]
Fam171b	chr3	787	507	89.2035	105.557	-16.3533	0.845076	2.41132e-05	2.41132e-05	FDR<0.05	-0.252787	small	45.4918	40.2198	50.7637	0.483805	0.68448	1.26216	0.493672	0.999945	Not Sig	nonsignificant	Y	.	family with sequence similarity 171, member B [Source:RGD Symbol;Acc:1562526]
Cript	chr6	3848	2587	82.1027	89.8279	-7.72526	0.913999	2.4213e-05	2.4213e-05	FDR<0.05	-0.0979277	negligible	388.953	388.425	389.482	0.24461	0.00852745	1.00272	0.993196	0.999945	Not Sig	nonsignificant	.	.	CXXC repeat containing interactor of PDZ3 domain [Source:RGD Symbol;Acc:621545]
Zdhhc22	chr6	280	172	64.9214	86.3105	-21.3891	0.752184	2.44182e-05	2.44182e-05	FDR<0.05	-0.440345	small	23.0759	23.1473	23.0045	0.640261	-0.0166673	0.993828	0.986702	0.999945	Not Sig	nonsignificant	.	Y	zinc finger DHHC-type palmitoyltransferase 22 [Source:RGD Symbol;Acc:1308446]
Prrt1	chr20	1401	802	94.3618	111.049	-16.6875	0.849729	2.46943e-05	2.46943e-05	FDR<0.05	-0.187823	negligible	149.452	130.476	168.428	0.383375	1.00656	1.29088	0.314145	0.999945	Not Sig	nonsignificant	Y	.	proline-rich transmembrane protein 1 [Source:RGD Symbol;Acc:1359348]
Atp1a3	chr1	8922	5638	103.822	109.247	-5.4249	0.950343	2.53586e-05	2.53586e-05	FDR<0.05	-0.0750942	negligible	1506.48	1562.63	1450.33	0.308595	-0.342316	0.928138	0.732113	0.999945	Not Sig	nonsignificant	.	Y	ATPase Na+/K+ transporting subunit alpha 3 [Source:RGD Symbol;Acc:2169]
Snrpf	chr7	1354	955	73.0135	84.2502	-11.2367	0.866628	2.55498e-05	2.55498e-05	FDR<0.05	-0.176504	negligible	20.0941	18.8269	21.3613	0.68429	0.259316	1.13462	0.795391	0.999945	Not Sig	nonsignificant	.	Y	small nuclear ribonucleoprotein polypeptide F [Source:RGD Symbol;Acc:1588229]
Exd2	chr6	1034	677	80.7147	95.1563	-14.4416	0.848233	2.59917e-05	2.59917e-05	FDR<0.05	-0.230149	small	201.351	195.838	206.865	0.30497	0.225543	1.05631	0.821557	0.999945	Not Sig	nonsignificant	.	.	exonuclease 3'-5' domain containing 2 [Source:RGD Symbol;Acc:1311087]
Suclg1	chr4	7623	5407	86.7582	91.5932	-4.83494	0.947213	2.60669e-05	2.60669e-05	FDR<0.05	-0.0806736	negligible	1526.39	1571.8	1480.97	0.214815	-0.4059	0.942214	0.684816	0.999945	Not Sig	nonsignificant	.	.	succinate-CoA ligase GDP/ADP-forming subunit alpha [Source:RGD Symbol;Acc:619821]
Eef1a1	chr8	41127	23579	85.122	83.8352	1.2868	1.01535	2.6464e-05	2.6464e-05	FDR<0.05	0.0527681	negligible	6060.07	5583.28	6536.86	0.215737	1.05501	1.17079	0.291423	0.999945	Not Sig	nonsignificant	.	.	eukaryotic translation elongation factor 1 alpha 1 [Source:RGD Symbol;Acc:67387]
Fubp1	chr2	958	635	108.878	127.58	-18.7022	0.853408	2.6469e-05	2.6469e-05	FDR<0.05	-0.188105	negligible	179.887	178.005	181.769	0.302102	0.082591	1.02115	0.934177	0.999945	Not Sig	nonsignificant	.	Y	far upstream element binding protein 1 [Source:RGD Symbol;Acc:1591892]
Serf2	chr3	15294	9428	83.5717	87.2759	-3.70418	0.957558	2.68749e-05	2.68749e-05	FDR<0.05	-0.0555242	negligible	2744.07	2656.3	2831.85	0.206867	0.449025	1.06609	0.653414	0.999945	Not Sig	nonsignificant	.	.	small EDRK-rich factor 2 [Source:RGD Symbol;Acc:1588368]
Tex264	chr8	2455	1553	84.9544	93.8556	-8.90124	0.90516	2.70142e-05	2.70142e-05	FDR<0.05	-0.120958	negligible	463.722	447.337	480.107	0.243685	0.434017	1.07326	0.664276	0.999945	Not Sig	nonsignificant	.	.	testis expressed 264 [Source:RGD Symbol;Acc:1359353]
Eloc	chr5	6842	4512	89.6722	95.2518	-5.5796	0.941423	2.70445e-05	2.70445e-05	FDR<0.05	-0.0841252	negligible	952.29	952.836	951.744	0.215853	-0.00943085	0.998854	0.992475	0.999945	Not Sig	nonsignificant	.	Y	elongin C [Source:RGD Symbol;Acc:620658]
Lgi1	chr1	1779	1241	93.9459	105.288	-11.3419	0.892277	2.74185e-05	2.74185e-05	FDR<0.05	-0.12729	negligible	270.231	274.394	266.067	0.308399	-0.175988	0.969654	0.860303	0.999945	Not Sig	nonsignificant	.	.	leucine-rich, glioma inactivated 1 [Source:RGD Symbol;Acc:628742]
Mrpl42	chr7	2201	1530	75.475	83.4971	-8.02203	0.903924	2.7478e-05	2.7478e-05	FDR<0.05	-0.155423	negligible	421.481	425.396	417.565	0.239581	-0.108134	0.981592	0.913889	0.999945	Not Sig	nonsignificant	.	.	mitochondrial ribosomal protein L42 [Source:RGD Symbol;Acc:1304915]
Arhgef4	chr9	513	349	87.5991	109.028	-21.4293	0.803452	2.76935e-05	2.76935e-05	FDR<0.05	-0.278009	small	66.786	70.9068	62.6652	0.442482	-0.353317	0.883768	0.723851	0.999945	Not Sig	nonsignificant	.	.	Rho guanine nucleotide exchange factor 4 [Source:RGD Symbol;Acc:1586179]
Fam107b	chr17	334	74	157.137	104.966	52.1703	1.49702	2.77074e-05	2.77074e-05	FDR<0.05	0.541693	medium	34.5159	17.5438	51.488	0.652824	2.37205	2.93482	0.0176898	0.999945	Not Sig	nonsignificant	.	Y	family with sequence similarity 107, member B [Source:RGD Symbol;Acc:1561482]
Prdx2	chr19	17386	11364	103.233	107.862	-4.62908	0.957084	2.78258e-05	2.78258e-05	FDR<0.05	-0.0449341	negligible	3140.94	3093.48	3188.4	0.202737	0.212591	1.03069	0.831646	0.999945	Not Sig	nonsignificant	.	.	peroxiredoxin 2 [Source:RGD Symbol;Acc:3838]
Ctsa	chr3	3242	2063	91.0295	99.6907	-8.6612	0.913119	2.79053e-05	2.79053e-05	FDR<0.05	-0.142435	negligible	602.08	574.652	629.509	0.230114	0.56285	1.09546	0.573537	0.999945	Not Sig	nonsignificant	.	.	cathepsin A [Source:RGD Symbol;Acc:1309070]
Tmed9	chr17	4072	2933	94.5757	101.187	-6.61133	0.934662	2.83172e-05	2.83172e-05	FDR<0.05	-0.0938013	negligible	868.308	901.437	835.18	0.217152	-0.51099	0.926498	0.609358	0.999945	Not Sig	nonsignificant	.	.	transmembrane p24 trafficking protein 9 [Source:RGD Symbol;Acc:1307627]
LOC102551184	chr17	334	118	152.504	111.758	40.7466	1.3646	2.88897e-05	2.88897e-05	FDR<0.05	0.468105	small	4.50963	3.16846	5.85081	1.43292	0.576041	1.84658	0.564587	0.999945	Not Sig	nonsignificant	.	.
Tef	chr7	1156	926	103.506	117.918	-14.4124	0.877776	2.91402e-05	2.91402e-05	FDR<0.05	-0.190607	negligible	122.512	126.865	118.159	0.328615	-0.320515	0.931376	0.748578	0.999945	Not Sig	nonsignificant	.	Y	TEF transcription factor, PAR bZIP family member [Source:RGD Symbol;Acc:3841]
Phpt1	chr3	5852	4083	99.7032	104.714	-5.0104	0.952151	2.97792e-05	2.97792e-05	FDR<0.05	-0.0815603	negligible	1066.27	1080.67	1051.88	0.214548	-0.182759	0.973357	0.854987	0.999945	Not Sig	nonsignificant	.	Y
LOC120102105	chr3	381	248	51.3704	72.6674	-21.2969	0.706926	2.99306e-05	2.99306e-05	FDR<0.05	-0.3111	small	10.2028	10.9448	9.46077	0.975536	-0.164672	0.864405	0.869202	0.999945	Not Sig	nonsignificant	.	.	18S ribosomal RNA [Source:RGD Symbol;Acc:41236247]
Aimp1	chr2	2114	1398	71.1495	80.1536	-9.00419	0.887663	3.021e-05	3.021e-05	FDR<0.05	-0.139994	negligible	421.629	416.732	426.526	0.248758	0.121073	1.0235	0.903633	0.999945	Not Sig	nonsignificant	.	.	aminoacyl tRNA synthetase complex-interacting multifunctional protein 1 [Source:RGD Symbol;Acc:620466]
Cops7a	chr4	3191	2151	103.59	110.755	-7.16522	0.935306	3.04397e-05	3.04397e-05	FDR<0.05	-0.106465	negligible	620.298	616.865	623.732	0.241283	0.050698	1.01113	0.959566	0.999945	Not Sig	nonsignificant	.	Y	COP9 signalosome subunit 7A [Source:RGD Symbol;Acc:1310070]
Armcx5	chrX	893	339	130.927	110.316	20.611	1.18684	3.0814e-05	3.0814e-05	FDR<0.05	0.252228	small	123.661	94.6057	152.717	0.341527	2.01219	1.61425	0.0442004	0.999945	Not Sig	nonsignificant	.	.	armadillo repeat containing, X-linked 5 [Source:RGD Symbol;Acc:7586448]
Vps28	chr7	6185	3828	100.915	108.064	-7.14869	0.933848	3.13066e-05	3.13066e-05	FDR<0.05	-0.0984961	negligible	1145.41	1101.09	1189.73	0.21038	0.53242	1.0805	0.594435	0.999945	Not Sig	nonsignificant	.	.	VPS28 subunit of ESCRT-I [Source:RGD Symbol;Acc:1306537]
Vsnl1	chr6	8333	5675	112.573	118.622	-6.04844	0.949011	3.15651e-05	3.15651e-05	FDR<0.05	-0.0765822	negligible	1589.21	1606.81	1571.62	0.214993	-0.154796	0.9781	0.876982	0.999945	Not Sig	nonsignificant	.	.	visinin-like 1 [Source:RGD Symbol;Acc:3966]
Scfd1	chr6	728	562	86.0639	106.079	-20.0151	0.811319	3.20257e-05	3.20257e-05	FDR<0.05	-0.182661	negligible	148.97	159.989	137.951	0.319368	-0.686382	0.86225	0.492473	0.999945	Not Sig	nonsignificant	.	.	sec1 family domain containing 1 [Source:RGD Symbol;Acc:619828]
Ube2r2	chr5	368	291	66.3457	87.131	-20.7854	0.761447	3.32719e-05	3.32719e-05	FDR<0.05	-0.269009	small	43.8398	49.4631	38.2166	0.48823	-0.766677	0.772628	0.443274	0.999945	Not Sig	nonsignificant	Y	.	ubiquitin-conjugating enzyme E2R 2 [Source:RGD Symbol;Acc:1594826]
Neurod1	chr3	706	379	81.6424	64.792	16.8504	1.26007	3.40207e-05	3.40207e-05	FDR<0.05	0.243228	small	137.182	125.582	148.782	0.318893	0.755243	1.18473	0.450103	0.999945	Not Sig	nonsignificant	.	Y	neuronal differentiation 1 [Source:RGD Symbol;Acc:3165]
Sirt3	chr1	2497	1624	92.6204	102.45	-9.82979	0.904053	3.42515e-05	3.42515e-05	FDR<0.05	-0.148633	negligible	493.519	473.946	513.091	0.243781	0.456173	1.08259	0.648266	0.999945	Not Sig	nonsignificant	.	.	sirtuin 3 [Source:RGD Symbol;Acc:1308374]
Fam104b	chrX	952	645	93.8169	108.529	-14.7119	0.864442	3.49923e-05	3.49923e-05	FDR<0.05	-0.203827	small	101.959	107.594	96.3241	0.373201	-0.466444	0.895252	0.640898	0.999945	Not Sig	nonsignificant	Y	Y	family with sequence similarity 104 member B [Source:RGD Symbol;Acc:2323310]
LOC100912002	chr10	754	549	112.74	131.977	-19.2371	0.854239	3.50163e-05	3.50163e-05	FDR<0.05	-0.234433	small	136.719	143.701	129.736	0.318328	-0.449959	0.90282	0.65274	0.999945	Not Sig	nonsignificant	.	.
Psmc6	chr15	3804	2738	96.3861	104.326	-7.94018	0.923891	3.52986e-05	3.52986e-05	FDR<0.05	-0.100584	negligible	795.287	811.785	778.79	0.232566	-0.269878	0.959354	0.787254	0.999945	Not Sig	nonsignificant	.	Y	proteasome 26S subunit, ATPase 6 [Source:RGD Symbol;Acc:1308825]
Mrpl53	chr4	1394	928	77.9726	88.0825	-10.1099	0.885223	3.54486e-05	3.54486e-05	FDR<0.05	-0.190189	negligible	31.7252	35.7155	27.7348	0.564311	-0.617164	0.776549	0.537127	0.999945	Not Sig	nonsignificant	.	.
Tmem60	chr4	1191	961	82.4836	94.9446	-12.461	0.868755	3.56861e-05	3.56861e-05	FDR<0.05	-0.160532	negligible	251.776	271.668	231.885	0.279739	-0.830618	0.853561	0.406189	0.999945	Not Sig	nonsignificant	.	.	transmembrane protein 60 [Source:RGD Symbol;Acc:1308939]
Itm2b	chr15	3952	2515	93.0705	100.385	-7.31407	0.927139	3.58619e-05	3.58619e-05	FDR<0.05	-0.111935	negligible	432.09	470.529	393.652	0.780766	-0.327796	0.836616	0.743066	0.999945	Not Sig	nonsignificant	Y	.	integral membrane protein 2B [Source:RGD Symbol;Acc:620727]
Eif3i	chr5	5000	3380	74.5672	80.4323	-5.8651	0.92708	3.61557e-05	3.61557e-05	FDR<0.05	-0.0917483	negligible	990.104	1003.74	976.468	0.212929	-0.18705	0.972831	0.851622	0.999945	Not Sig	nonsignificant	.	.	eukaryotic translation initiation factor 3, subunit I [Source:RGD Symbol;Acc:1584560]
Man1b1	chr3	1183	563	147.902	133.405	14.4968	1.10867	3.62223e-05	3.62223e-05	FDR<0.05	0.217662	small	170.141	149.15	191.132	0.318457	1.08568	1.28147	0.27762	0.999945	Not Sig	nonsignificant	.	.	mannosidase, alpha, class 1B, member 1 [Source:RGD Symbol;Acc:1563595]
Dctn1	chr4	1507	970	96.9571	109.619	-12.6617	0.884493	3.68176e-05	3.68176e-05	FDR<0.05	-0.169246	negligible	266.193	265.117	267.268	0.300222	0.0646171	1.00811	0.948479	0.999945	Not Sig	nonsignificant	.	.
Tmco1	chr13	2464	1789	62.8847	71.0049	-8.12016	0.885639	3.75496e-05	3.75496e-05	FDR<0.05	-0.131514	negligible	495.11	517.36	472.86	0.236865	-0.557254	0.913987	0.577354	0.999945	Not Sig	nonsignificant	.	.	transmembrane and coiled-coil domains 1 [Source:RGD Symbol;Acc:1359178]
Commd9	chr3	1864	1237	86.9236	97.938	-11.0144	0.887537	3.82499e-05	3.82499e-05	FDR<0.05	-0.162208	negligible	375.196	374.68	375.713	0.255072	-0.00117288	1.00276	0.999064	0.999945	Not Sig	nonsignificant	.	.	COMM domain containing 9 [Source:RGD Symbol;Acc:1307706]
Cdadc1	chr15	1430	1001	99.3084	110.444	-11.1356	0.899175	3.85171e-05	3.85171e-05	FDR<0.05	-0.15477	negligible	223.828	219.951	227.704	0.275012	0.185857	1.03525	0.852557	0.999945	Not Sig	nonsignificant	.	Y	cytidine and dCMP deaminase domain containing 1 [Source:RGD Symbol;Acc:1311845]
Pdyn	chr3	1973	1027	90.4206	102.633	-12.2119	0.881013	3.8536e-05	3.8536e-05	FDR<0.05	-0.128637	negligible	329.971	284.026	375.915	0.256389	1.56938	1.32352	0.116559	0.999945	Not Sig	nonsignificant	.	.	prodynorphin [Source:RGD Symbol;Acc:62054]
B3gnt2	chr14	60	47	119.565	69.1312	50.4342	1.72954	3.92814e-05	3.92814e-05	FDR<0.05	0.808701	large	5.68569	5.94378	5.4276	1.26881	-0.0675652	0.913156	0.946132	0.999945	Not Sig	nonsignificant	.	.	UDP-GlcNAc:betaGal beta-1,3-N-acetylglucosaminyltransferase 2 [Source:RGD Symbol;Acc:1310077]
Morn4	chr1	707	481	94.7997	110.159	-15.3589	0.860575	4.0118e-05	4.0118e-05	FDR<0.05	-0.22098	small	128.81	120.763	136.857	0.3284	0.573227	1.13327	0.566491	0.999945	Not Sig	nonsignificant	.	.	MORN repeat containing 4 [Source:RGD Symbol;Acc:1307336]
Tmem199	chr10	1463	1128	91.6654	104.881	-13.216	0.873991	4.02399e-05	4.02399e-05	FDR<0.05	-0.14698	negligible	326.294	344.122	308.467	0.260768	-0.620992	0.896391	0.534605	0.999945	Not Sig	nonsignificant	.	.	transmembrane protein 199 [Source:RGD Symbol;Acc:1566425]
Ephx4	chr14	520	335	83.6735	102.514	-18.8404	0.816216	4.05909e-05	4.05909e-05	FDR<0.05	-0.223933	small	98.5218	93.8469	103.197	0.363169	0.350081	1.09963	0.726278	0.999945	Not Sig	nonsignificant	.	.	epoxide hydrolase 4 [Source:RGD Symbol;Acc:1308891]
Grpel1	chr14	3481	2272	94.6655	102.296	-7.63059	0.925407	4.15334e-05	4.15334e-05	FDR<0.05	-0.100577	negligible	686.989	696.567	677.411	0.2224	-0.18433	0.9725	0.853755	0.999945	Not Sig	nonsignificant	.	.	GrpE-like 1, mitochondrial [Source:RGD Symbol;Acc:70947]
Mrps18a	chr9	3305	2371	100.115	108.769	-8.65409	0.920436	4.16327e-05	4.16327e-05	FDR<0.05	-0.106729	negligible	651.151	647.945	654.357	0.231854	0.0493728	1.0099	0.960622	0.999945	Not Sig	nonsignificant	.	.	mitochondrial ribosomal protein S18A [Source:RGD Symbol;Acc:735229]
Cuta	chr20	3983	2588	92.6824	99.5639	-6.88153	0.930883	4.17216e-05	4.17216e-05	FDR<0.05	-0.113806	negligible	735.614	738.596	732.631	0.225446	-0.0609859	0.991924	0.95137	0.999945	Not Sig	nonsignificant	.	.	cutA divalent cation tolerance homolog [Source:RGD Symbol;Acc:1303306]
Cln3	chr1	270	215	91.8589	127.625	-35.7663	0.719755	4.26696e-05	4.26696e-05	FDR<0.05	-0.389194	small	56.0415	57.1613	54.9217	0.437988	-0.134495	0.96082	0.893011	0.999945	Not Sig	nonsignificant	.	.	CLN3 lysosomal/endosomal transmembrane protein, battenin [Source:RGD Symbol;Acc:1359537]
Pef1	chr5	1057	730	90.9842	102.574	-11.5899	0.887009	4.34551e-05	4.34551e-05	FDR<0.05	-0.197267	negligible	200.844	202.067	199.621	0.2835	-0.0566227	0.987896	0.954846	0.999945	Not Sig	nonsignificant	.	.	penta-EF hand domain containing 1 [Source:RGD Symbol;Acc:1359536]
Sgk1	chr1	4591	2057	116.732	109.754	6.97796	1.06358	4.38397e-05	4.38397e-05	FDR<0.05	0.0995881	negligible	740.286	567.33	913.242	0.299082	2.27791	1.60972	0.0227322	0.999945	Not Sig	nonsignificant	.	Y	serum/glucocorticoid regulated kinase 1 [Source:RGD Symbol;Acc:3668]
Trappc4	chr8	1693	1218	95.8516	109.123	-13.2718	0.878378	4.40228e-05	4.40228e-05	FDR<0.05	-0.150576	negligible	344.591	351.086	338.095	0.253295	-0.227378	0.962996	0.820129	0.999945	Not Sig	nonsignificant	.	.	trafficking protein particle complex subunit 4 [Source:RGD Symbol;Acc:1302991]
Trim35	chr15	938	413	119.526	104.399	15.1264	1.14489	4.46383e-05	4.46383e-05	FDR<0.05	0.235313	small	66.5154	55.8254	77.2054	0.432549	1.10891	1.38298	0.267469	0.999945	Not Sig	nonsignificant	.	.	tripartite motif-containing 35 [Source:RGD Symbol;Acc:1564642]
Pgap4	chr5	927	779	82.6971	95.7617	-13.0647	0.863571	4.52515e-05	4.52515e-05	FDR<0.05	-0.204109	small	186.28	203.614	168.947	0.31232	-0.888708	0.829738	0.37416	0.999945	Not Sig	nonsignificant	.	.	post-GPI attachment to proteins GalNAc transferase 4 [Source:RGD Symbol;Acc:1307218]
App	chr11	6944	4192	111.61	118.229	-6.61888	0.944016	4.55942e-05	4.55942e-05	FDR<0.05	-0.0787668	negligible	1211.05	1166.72	1255.38	0.281764	0.383355	1.07599	0.701457	0.999945	Not Sig	nonsignificant	.	.	amyloid beta precursor protein [Source:RGD Symbol;Acc:2139]
Cstf2t	chr1	279	139	116.837	89.5152	27.3214	1.30522	4.59793e-05	4.59793e-05	FDR<0.05	0.407739	small	7.18032	8.50983	5.85081	1.12975	-0.445107	0.687535	0.656242	0.999945	Not Sig	nonsignificant	.	Y	cleavage stimulation factor subunit 2, tau variant [Source:RGD Symbol;Acc:1310026]
Ndufb6	chr5	10099	6074	92.0768	96.2734	-4.1966	0.95641	4.60993e-05	4.60993e-05	FDR<0.05	-0.063551	negligible	1811.71	1716.58	1906.83	0.211495	0.722223	1.11083	0.470157	0.999945	Not Sig	nonsignificant	.	.	NADH:ubiquinone oxidoreductase subunit B6 [Source:RGD Symbol;Acc:1311354]
Banf1	chr1	7133	4704	90.3427	94.9802	-4.63748	0.951174	4.61198e-05	4.61198e-05	FDR<0.05	-0.0750392	negligible	1387.81	1385.51	1390.1	0.206857	0.0226852	1.00331	0.981901	0.999945	Not Sig	nonsignificant	.	.	BAF nuclear assembly factor 1 [Source:RGD Symbol;Acc:620662]
Syp	chrX	7573	4871	107.416	114.71	-7.29372	0.936416	4.68525e-05	4.68525e-05	FDR<0.05	-0.0806384	negligible	1069.84	1053.88	1085.8	0.216954	0.20174	1.03028	0.84012	0.999945	Not Sig	nonsignificant	.	.	synaptophysin [Source:RGD Symbol;Acc:3802]
Snrpa	chr1	733	505	102.388	124.764	-22.3758	0.820655	4.6859e-05	4.6859e-05	FDR<0.05	-0.194627	negligible	156.27	158.182	154.358	0.31362	-0.121686	0.975822	0.903147	0.999945	Not Sig	nonsignificant	.	.	small nuclear ribonucleoprotein polypeptide A [Source:RGD Symbol;Acc:1307416]
Commd2	chr2	911	809	91.7093	105.354	-13.6443	0.87049	4.71893e-05	4.71893e-05	FDR<0.05	-0.186105	negligible	18.2176	20.9744	15.4608	0.730755	-0.637953	0.737127	0.523504	0.999945	Not Sig	nonsignificant	.	.	COMM domain containing 2 [Source:RGD Symbol;Acc:1588810]
LOC120095139	chr10	2059	951	157.128	142.293	14.835	1.10426	4.79615e-05	4.79615e-05	FDR<0.05	0.148044	negligible	342.954	284.946	400.962	0.278371	1.74104	1.40715	0.0816772	0.999945	Not Sig	nonsignificant	.	.
Cacna1e	chr13	1014	600	132.672	155.973	-23.3019	0.850604	4.81815e-05	4.81815e-05	FDR<0.05	-0.193954	negligible	29.8635	26.3158	33.4111	0.575031	0.583945	1.26962	0.559257	0.999945	Not Sig	nonsignificant	.	Y	calcium voltage-gated channel subunit alpha1 E [Source:RGD Symbol;Acc:2246]
Arf1	chr10	15463	10200	97.5488	102.258	-4.70961	0.953944	4.83712e-05	4.83712e-05	FDR<0.05	-0.0550948	negligible	3079.31	3053.75	3104.87	0.204398	0.114382	1.01674	0.908935	0.999945	Not Sig	nonsignificant	.	Y	ADP-ribosylation factor 1 [Source:RGD Symbol;Acc:621270]
LOC103693430	chr10	5740	4085	92.6515	98.2956	-5.64409	0.94258	4.90035e-05	4.90035e-05	FDR<0.05	-0.085066	negligible	410.43	421.991	398.87	0.246567	-0.318361	0.94521	0.750211	0.999945	Not Sig	nonsignificant	.	.
Jazf1	chr4	624	420	97.5153	121.985	-24.4694	0.799406	4.92546e-05	4.92546e-05	FDR<0.05	-0.253373	small	91.4733	91.228	91.7185	0.368254	0.00232617	1.00538	0.998144	0.999945	Not Sig	nonsignificant	.	Y	JAZF zinc finger 1 [Source:RGD Symbol;Acc:1589007]
Lyrm9	chr10	422	289	95.6308	117.809	-22.1781	0.811745	5.01151e-05	5.01151e-05	FDR<0.05	-0.344356	small	40.3831	44.0689	36.6974	0.502462	-0.529317	0.832727	0.596586	0.999945	Not Sig	nonsignificant	.	.	LYR motif containing 9 [Source:RGD Symbol;Acc:1562012]
Mrfap1	chr14	2391	1426	82.8958	91.1296	-8.23389	0.909646	5.01468e-05	5.01468e-05	FDR<0.05	-0.13235	negligible	289.431	270.537	308.324	0.31353	0.627927	1.13968	0.530052	0.999945	Not Sig	nonsignificant	.	.
LOC108352861	chr14	23488	13458	58.0661	59.9934	-1.92735	0.967874	5.02077e-05	5.02077e-05	FDR<0.05	-0.0354015	negligible	3930.66	3736.52	4124.81	0.225225	0.63714	1.10392	0.524034	0.999945	Not Sig	nonsignificant	.	.	40S ribosomal protein S28 pseudogene [Source:RGD Symbol;Acc:11455995]
LOC100909954	chr6	806	465	99.7661	121.376	-21.6098	0.821959	5.05032e-05	5.05032e-05	FDR<0.05	-0.209414	small	21.6377	21.8643	21.4111	0.659245	-0.0509045	0.979272	0.959402	0.999945	Not Sig	nonsignificant	.	Y
Acta1	chr19	1014	741	85.969	99.0861	-13.1171	0.86762	5.05266e-05	5.05266e-05	FDR<0.05	-0.196365	negligible	173.312	174.861	171.762	0.294543	-0.0868666	0.982273	0.930778	0.999945	Not Sig	nonsignificant	.	.	actin, alpha 1, skeletal muscle [Source:RGD Symbol;Acc:2025]
Pigu	chr3	566	413	87.3383	106.501	-19.1628	0.82007	5.09731e-05	5.09731e-05	FDR<0.05	-0.230291	small	104.997	98.4822	111.511	0.374578	0.433538	1.13229	0.664624	0.999945	Not Sig	nonsignificant	.	.	phosphatidylinositol glycan anchor biosynthesis, class U [Source:RGD Symbol;Acc:727825]
Gnas	chr3	8269	5699	106.234	111.509	-5.27473	0.952697	5.10711e-05	5.10711e-05	FDR<0.05	-0.045589	negligible	1551.88	1647.16	1456.6	0.263898	-0.665546	0.884309	0.505701	0.999945	Not Sig	nonsignificant	Y	Y	GNAS complex locus [Source:RGD Symbol;Acc:2716]
Dnajc8	chr5	2944	2080	81.3974	91.7225	-10.3252	0.887431	5.10932e-05	5.10932e-05	FDR<0.05	-0.103342	negligible	573.13	579.89	566.371	0.234954	-0.156029	0.976687	0.87601	0.999945	Not Sig	nonsignificant	.	.	DnaJ heat shock protein family (Hsp40) member C8 [Source:RGD Symbol;Acc:1306024]
Tufm	chr1	2029	1427	91.4697	100.513	-9.04326	0.910029	5.19239e-05	5.19239e-05	FDR<0.05	-0.134112	negligible	400.026	410.372	389.681	0.264218	-0.305557	0.94958	0.759942	0.999945	Not Sig	nonsignificant	.	.	Tu translation elongation factor, mitochondrial [Source:RGD Symbol;Acc:1305501]
Mrpl49	chr1	2771	2041	96.6848	105.992	-9.30672	0.912194	5.21934e-05	5.21934e-05	FDR<0.05	-0.115004	negligible	389.982	412.02	367.944	0.266212	-0.633223	0.893024	0.526588	0.999945	Not Sig	nonsignificant	.	.	mitochondrial ribosomal protein L49 [Source:RGD Symbol;Acc:1309920]
Rtraf	chr15	2754	1761	95.922	105.094	-9.17228	0.912723	5.27341e-05	5.27341e-05	FDR<0.05	-0.118972	negligible	488.312	471.245	505.379	0.242693	0.424169	1.07243	0.671442	0.999945	Not Sig	nonsignificant	.	.	RNA transcription, translation and transport factor [Source:RGD Symbol;Acc:1304704]
Timmdc1	chr11	1213	808	87.3163	101.21	-13.8938	0.862723	5.2988e-05	5.2988e-05	FDR<0.05	-0.174331	negligible	240.003	235.846	244.16	0.274036	0.171703	1.03525	0.863671	0.999945	Not Sig	nonsignificant	.	.	translocase of inner mitochondrial membrane domain containing 1 [Source:RGD Symbol;Acc:1359380]
Mxi1	chr1	540	354	84.9251	104.248	-19.3227	0.814646	5.3653e-05	5.3653e-05	FDR<0.05	-0.248577	small	81.7491	75.4385	88.0597	0.383795	0.567149	1.1673	0.570613	0.999945	Not Sig	nonsignificant	.	Y	MAX interactor 1, dimerization protein [Source:RGD Symbol;Acc:3128]
Ccdc43	chr10	263	223	84.6534	112.795	-28.1417	0.750506	5.46777e-05	5.46777e-05	FDR<0.05	-0.307185	small	48.7022	55.8528	41.5517	0.501093	-0.889559	0.743949	0.373703	0.999945	Not Sig	nonsignificant	.	Y	coiled-coil domain containing 43 [Source:RGD Symbol;Acc:1311929]
Sf3b2	chr1	2217	1429	89.2937	99.6316	-10.3379	0.896239	5.6561e-05	5.6561e-05	FDR<0.05	-0.145155	negligible	465.154	454.386	475.923	0.240268	0.265796	1.0474	0.790396	0.999945	Not Sig	nonsignificant	.	Y	splicing factor 3b, subunit 2 [Source:RGD Symbol;Acc:1307159]
Sdhd	chr8	3381	2471	94.4483	101.702	-7.25424	0.928672	5.71553e-05	5.71553e-05	FDR<0.05	-0.110746	negligible	648.91	669.359	628.461	0.231403	-0.393435	0.938899	0.693998	0.999945	Not Sig	nonsignificant	Y	.	succinate dehydrogenase complex subunit D [Source:RGD Symbol;Acc:735231]
Cnot8	chr10	1583	951	100.557	112.412	-11.8551	0.894538	5.76355e-05	5.76355e-05	FDR<0.05	-0.161379	negligible	296.294	278.842	313.746	0.260119	0.647	1.12518	0.517632	0.999945	Not Sig	nonsignificant	Y	Y	CCR4-NOT transcription complex, subunit 8 [Source:RGD Symbol;Acc:1306401]
Polr2c	chr19	1974	1380	99.8631	111.97	-12.1073	0.89187	5.77537e-05	5.77537e-05	FDR<0.05	-0.11445	negligible	401.659	405.944	397.374	0.245187	-0.137124	0.978891	0.890933	0.999945	Not Sig	nonsignificant	.	.	RNA polymerase II subunit C [Source:RGD Symbol;Acc:1306935]
Rpl31l4	chr12	1165	877	66.8594	75.9992	-9.1398	0.879738	5.82369e-05	5.82369e-05	FDR<0.05	-0.155541	negligible	562.798	545.502	580.094	0.245478	0.376648	1.06341	0.706435	0.999945	Not Sig	nonsignificant	.	.	ribosomal protein L31-like 4 [Source:RGD Symbol;Acc:2319106]
St6galnac4	chr3	257	206	82.3225	112.171	-29.8488	0.7339	5.87298e-05	5.87298e-05	FDR<0.05	-0.376752	small	46.0455	49.0446	43.0464	0.484598	-0.416046	0.877701	0.677376	0.999945	Not Sig	nonsignificant	Y	Y	ST6 N-acetylgalactosaminide alpha-2,6-sialyltransferase 4 [Source:RGD Symbol;Acc:1303005]
Arhgef3	chr16	995	356	137.259	115.101	22.1581	1.19251	5.91395e-05	5.91395e-05	FDR<0.05	0.216657	small	137.739	94.9735	180.505	0.415931	2.19986	1.90058	0.0278168	0.999945	Not Sig	nonsignificant	.	Y	Rho guanine nucleotide exchange factor 3 [Source:RGD Symbol;Acc:1310672]
Tm2d3	chr1	2364	1542	67.5064	74.7185	-7.21216	0.903476	5.98902e-05	5.98902e-05	FDR<0.05	-0.144426	negligible	451.88	456.32	447.44	0.239751	-0.113907	0.98054	0.909312	0.999945	Not Sig	nonsignificant	Y	.	TM2 domain containing 3 [Source:RGD Symbol;Acc:1564929]
Ecsit	chr8	1128	791	66.1332	77.2277	-11.0945	0.85634	6.04133e-05	6.04133e-05	FDR<0.05	-0.161659	negligible	212.757	208.615	216.898	0.291615	0.167448	1.0397	0.867018	0.999945	Not Sig	nonsignificant	.	.	ECSIT signaling integrator [Source:RGD Symbol;Acc:1359488]
RGD1562987	chr18	6258	4223	98.9801	106.015	-7.03532	0.933639	6.05456e-05	6.05456e-05	FDR<0.05	-0.0825373	negligible	1222.47	1240.37	1204.57	0.208802	-0.20194	0.971139	0.839963	0.999945	Not Sig	nonsignificant	.	.
Copb2	chr8	1321	896	83.3773	97.0823	-13.705	0.858831	6.15041e-05	6.15041e-05	FDR<0.05	-0.155631	negligible	274.082	270.019	278.144	0.270339	0.13716	1.03009	0.890905	0.999945	Not Sig	nonsignificant	.	.	COPI coat complex subunit beta 2 [Source:RGD Symbol;Acc:628746]
Dnajb4	chr2	1893	365	107.369	89.13	18.2387	1.20463	6.2092e-05	6.2092e-05	FDR<0.05	0.164428	negligible	227.677	95.3646	359.99	0.384608	4.98986	3.77488	6.04245e-07	0.000270214	FDR<0.05	upregulated	.	.	DnaJ heat shock protein family (Hsp40) member B4 [Source:RGD Symbol;Acc:1305826]
Use1	chr16	4171	2677	89.0051	96.5482	-7.54315	0.921872	6.24652e-05	6.24652e-05	FDR<0.05	-0.0999442	negligible	738.632	714.504	762.76	0.224192	0.41725	1.06754	0.676496	0.999945	Not Sig	nonsignificant	.	.	unconventional SNARE in the ER 1 [Source:RGD Symbol;Acc:1306660]
Cpsf2	chr6	307	235	86.5178	108.631	-22.1132	0.796438	6.32083e-05	6.32083e-05	FDR<0.05	-0.395388	small	38.9074	41.7649	36.0499	0.518783	-0.431626	0.863162	0.666013	0.999945	Not Sig	nonsignificant	.	Y	cleavage and polyadenylation specific factor 2 [Source:RGD Symbol;Acc:1309687]
Eif3el1	chr7	2250	1445	69.8376	79.8676	-10.03	0.874417	6.43918e-05	6.43918e-05	FDR<0.05	-0.106581	negligible	406.295	384.916	427.673	0.242876	0.618074	1.11108	0.536527	0.999945	Not Sig	nonsignificant	.	.
Eif3k	chr1	4998	3194	78.1651	83.6638	-5.49869	0.934276	6.52204e-05	6.52204e-05	FDR<0.05	-0.0799447	negligible	913.873	906.146	921.6	0.217449	0.115965	1.01705	0.907681	0.999945	Not Sig	nonsignificant	.	.	eukaryotic translation initiation factor 3, subunit K [Source:RGD Symbol;Acc:1309221]
Dctn5	chr1	1918	1407	91.6834	101.442	-9.75863	0.903801	6.55994e-05	6.55994e-05	FDR<0.05	-0.138294	negligible	386.282	406.362	366.202	0.249255	-0.612593	0.901172	0.540145	0.999945	Not Sig	nonsignificant	.	.	dynactin subunit 5 [Source:RGD Symbol;Acc:1305654]
Tmod1	chr5	342	198	87.2083	114.638	-27.43	0.760726	6.77455e-05	6.77455e-05	FDR<0.05	-0.353973	small	59.1319	56.2714	61.9924	0.432517	0.299992	1.10167	0.764184	0.999945	Not Sig	nonsignificant	.	.	tropomodulin 1 [Source:RGD Symbol;Acc:3874]
Metap2	chr7	2638	1936	92.8448	102.057	-9.21176	0.909739	6.80308e-05	6.80308e-05	FDR<0.05	-0.122183	negligible	542.589	555.407	529.771	0.242003	-0.292318	0.953844	0.770044	0.999945	Not Sig	nonsignificant	.	.	methionyl aminopeptidase 2 [Source:RGD Symbol;Acc:70995]
Amph	chr17	2642	1961	98.0705	109.112	-11.0417	0.898805	6.84313e-05	6.84313e-05	FDR<0.05	-0.105961	negligible	545.599	567.376	523.821	0.25636	-0.467294	0.923233	0.64029	0.999945	Not Sig	nonsignificant	.	Y
Eapp	chr6	1417	984	74.7805	86.04	-11.2595	0.869137	6.85909e-05	6.85909e-05	FDR<0.05	-0.169907	negligible	279.831	279.602	280.06	0.276834	-0.0120178	1.00164	0.990411	0.999945	Not Sig	nonsignificant	.	Y	E2F-associated phosphoprotein [Source:RGD Symbol;Acc:1309624]
Gpd1	chr7	1466	1107	139.168	154.659	-15.4904	0.899841	6.94389e-05	6.94389e-05	FDR<0.05	-0.148152	negligible	259.188	262.168	256.208	0.357863	-0.126411	0.977265	0.899406	0.999945	Not Sig	nonsignificant	.	.	glycerol-3-phosphate dehydrogenase 1 [Source:RGD Symbol;Acc:621381]
Nckap1	chr3	2274	1419	102.124	114.644	-12.5197	0.890795	6.97745e-05	6.97745e-05	FDR<0.05	-0.109553	negligible	354.881	361.501	348.261	0.329344	-0.143137	0.963374	0.886182	0.999945	Not Sig	nonsignificant	.	.	NCK-associated protein 1 [Source:RGD Symbol;Acc:61939]
RGD1565784	chr10	1089	761	98.9489	114.256	-15.3072	0.866027	7.01277e-05	7.01277e-05	FDR<0.05	-0.167418	negligible	201.338	200.393	202.284	0.294025	0.0239293	1.00943	0.980909	0.999945	Not Sig	nonsignificant	.	.
Gpkow	chrX	301	197	79.4976	106.897	-27.3995	0.743683	7.02278e-05	7.02278e-05	FDR<0.05	-0.351308	small	51.9259	48.2583	55.5936	0.45897	0.449892	1.152	0.652788	0.999945	Not Sig	nonsignificant	.	.	G patch domain and KOW motifs [Source:RGD Symbol;Acc:1583600]
Ndrg3	chr3	6310	4278	104.659	112.07	-7.41075	0.933874	7.02593e-05	7.02593e-05	FDR<0.05	-0.0704971	negligible	1267.18	1277.62	1256.75	0.246733	-0.106782	0.983662	0.914962	0.999945	Not Sig	nonsignificant	.	Y
Plekhb2	chr9	3495	2328	92.9453	99.8614	-6.9161	0.930743	7.08666e-05	7.08666e-05	FDR<0.05	-0.13555	negligible	607.531	612.519	602.543	0.254047	-0.109633	0.983713	0.9127	0.999945	Not Sig	nonsignificant	.	Y	pleckstrin homology domain containing B2 [Source:RGD Symbol;Acc:1310954]
Emc9	chr15	1069	746	87.3959	99.0156	-11.6197	0.882648	7.10997e-05	7.10997e-05	FDR<0.05	-0.171427	negligible	202.387	206.125	198.649	0.284941	-0.180553	0.963729	0.856719	0.999945	Not Sig	nonsignificant	.	.	ER membrane protein complex subunit 9 [Source:RGD Symbol;Acc:1308113]
Gpr22	chr6	931	418	105.988	88.6745	17.3135	1.19525	7.18215e-05	7.18215e-05	FDR<0.05	0.225781	small	81.8331	65.1997	98.4664	0.383415	1.5646	1.51023	0.117678	0.999945	Not Sig	nonsignificant	Y	Y	G protein-coupled receptor 22 [Source:RGD Symbol;Acc:1310848]
Rpn2	chr3	2551	1731	79.0108	86.9395	-7.92871	0.908802	7.20324e-05	7.20324e-05	FDR<0.05	-0.145603	negligible	529.974	528.434	531.515	0.233001	0.035462	1.00583	0.971711	0.999945	Not Sig	nonsignificant	.	.	ribophorin II [Source:RGD Symbol;Acc:62075]
Ddx23	chr7	1159	746	81.6811	94.5122	-12.8311	0.864239	7.22173e-05	7.22173e-05	FDR<0.05	-0.203524	small	236.264	220.03	252.499	0.281256	0.71117	1.14757	0.476979	0.999945	Not Sig	nonsignificant	.	.	DEAD-box helicase 23 [Source:RGD Symbol;Acc:1308685]
Anapc13	chr8	4201	2588	74.1738	79.5036	-5.3298	0.932962	7.40996e-05	7.40996e-05	FDR<0.05	-0.120865	negligible	716.371	687.662	745.081	0.221161	0.526013	1.0835	0.598879	0.999945	Not Sig	nonsignificant	.	.	anaphase promoting complex subunit 13 [Source:RGD Symbol;Acc:1583270]
Slc25a11	chr10	1598	1043	97.4691	107.224	-9.75521	0.909021	7.43763e-05	7.43763e-05	FDR<0.05	-0.151759	negligible	186.857	189.106	184.608	0.288434	-0.117875	0.976216	0.906167	0.999945	Not Sig	nonsignificant	.	.	solute carrier family 25 member 11 [Source:RGD Symbol;Acc:708476]
Lbh	chr6	467	143	129.222	96.0089	33.2127	1.34593	7.44489e-05	7.44489e-05	FDR<0.05	0.39625	small	29.795	15.9205	43.6695	0.627608	2.28416	2.74297	0.0223621	0.999945	Not Sig	nonsignificant	.	.	LBH regulator of WNT signaling pathway [Source:RGD Symbol;Acc:1584525]
Fbxo22	chr8	956	705	87.8521	101.33	-13.478	0.866989	7.55502e-05	7.55502e-05	FDR<0.05	-0.161968	negligible	207.065	214.61	199.52	0.285978	-0.371069	0.929687	0.710586	0.999945	Not Sig	nonsignificant	.	Y	F-box protein 22 [Source:RGD Symbol;Acc:1306664]
COX2	chrM	131481	88147	50.8931	51.1526	-0.259439	0.994928	7.58643e-05	7.58643e-05	FDR<0.05	-0.00794592	negligible	20684.5	21351.4	20017.6	0.200677	-0.463327	0.937532	0.64313	0.999945	Not Sig	nonsignificant	.	.	mitochondrially encoded cytochrome c oxidase II [Source:RGD Symbol;Acc:621872]
Retreg2	chr9	1129	754	93.0997	107.983	-14.8837	0.862167	7.62089e-05	7.62089e-05	FDR<0.05	-0.212212	small	188.564	200.81	176.318	0.29325	-0.622966	0.878038	0.533307	0.999945	Not Sig	nonsignificant	.	.	reticulophagy regulator family member 2 [Source:RGD Symbol;Acc:1306844]
Aco2	chr7	6386	4251	86.5335	92.2262	-5.69267	0.938275	7.6332e-05	7.6332e-05	FDR<0.05	-0.0749212	negligible	1071.94	1047.09	1096.79	0.240001	0.26662	1.04747	0.789762	0.999945	Not Sig	nonsignificant	.	.	aconitase 2 [Source:RGD Symbol;Acc:621360]
Psmg2	chr18	931	677	94.9367	108.519	-13.5821	0.874841	7.69816e-05	7.69816e-05	FDR<0.05	-0.200534	small	197.799	195.679	199.918	0.297763	0.0851501	1.02166	0.932142	0.999945	Not Sig	nonsignificant	.	.	proteasome assembly chaperone 2 [Source:RGD Symbol;Acc:1304867]
Gpn3	chr12	884	616	99.7277	118.865	-19.137	0.839002	7.70452e-05	7.70452e-05	FDR<0.05	-0.20342	small	175.475	175.779	175.172	0.298095	-0.0327404	0.996547	0.973882	0.999945	Not Sig	nonsignificant	.	.	GPN-loop GTPase 3 [Source:RGD Symbol;Acc:1303034]
Babam2	chr6	1797	1147	103.12	114.667	-11.5473	0.899297	7.71642e-05	7.71642e-05	FDR<0.05	-0.181674	negligible	336.135	316.026	356.244	0.263079	0.634841	1.12726	0.525532	0.999945	Not Sig	nonsignificant	.	.	BRISC and BRCA1 A complex member 2 [Source:RGD Symbol;Acc:735111]
Ift20	chr10	1362	1047	89.8063	102.748	-12.9417	0.874044	7.72881e-05	7.72881e-05	FDR<0.05	-0.134545	negligible	293.794	313.824	273.764	0.259011	-0.757547	0.872349	0.448722	0.999945	Not Sig	nonsignificant	.	.	intraflagellar transport 20 [Source:RGD Symbol;Acc:1309400]
Selenok	chr16	6342	3864	98.9375	93.3748	5.56268	1.05957	7.84348e-05	7.84348e-05	FDR<0.05	0.0793133	negligible	1076.41	1027.62	1125.21	0.216873	0.600977	1.09496	0.547855	0.999945	Not Sig	nonsignificant	.	Y	selenoprotein K [Source:RGD Symbol;Acc:1303129]
Ube4b	chr5	497	349	87.7601	110.374	-22.6144	0.795112	7.92576e-05	7.92576e-05	FDR<0.05	-0.285361	small	79.5157	81.3295	77.7019	0.384306	-0.165579	0.955396	0.868488	0.999945	Not Sig	nonsignificant	.	Y	ubiquitination factor E4B [Source:RGD Symbol;Acc:1304738]
Nsg2	chr10	8970	5802	105.505	111.111	-5.60511	0.949554	7.94774e-05	7.94774e-05	FDR<0.05	-0.0665132	negligible	1410.98	1373.8	1448.16	0.210634	0.365489	1.05413	0.714747	0.999945	Not Sig	nonsignificant	.	.	neuronal vesicle trafficking associated 2 [Source:RGD Symbol;Acc:1563944]
Ptk2b	chr15	5609	3660	94.5021	101.624	-7.12141	0.929924	8.0286e-05	8.0286e-05	FDR<0.05	-0.0933735	negligible	1104.69	1083.68	1125.7	0.210993	0.258851	1.03877	0.79575	0.999945	Not Sig	nonsignificant	.	.	protein tyrosine kinase 2 beta [Source:RGD Symbol;Acc:628758]
Irs2	chr16	1358	202	127.299	104.436	22.8632	1.21892	8.05327e-05	8.05327e-05	FDR<0.05	0.268386	small	75.8354	30.2959	121.375	0.512957	3.88916	4.00631	0.000100591	0.0233914	FDR<0.05	upregulated	.	.	insulin receptor substrate 2 [Source:RGD Symbol;Acc:69316]
Bcas2	chr2	2683	1988	88.3275	96.2954	-7.96793	0.917255	8.1131e-05	8.1131e-05	FDR<0.05	-0.121569	negligible	589.005	629.114	548.896	0.226769	-0.867889	0.87249	0.385455	0.999945	Not Sig	nonsignificant	.	Y	BCAS2, pre-mRNA processing factor [Source:RGD Symbol;Acc:1306485]
Ndufv3	chr20	5871	3927	88.804	93.8915	-5.08749	0.945815	8.11512e-05	8.11512e-05	FDR<0.05	-0.0851567	negligible	302.937	299.423	306.451	0.260129	0.121141	1.02347	0.903579	0.999945	Not Sig	nonsignificant	.	.	NADH:ubiquinone oxidoreductase subunit V3 [Source:RGD Symbol;Acc:621020]
Becn1	chr10	2034	1360	86.675	97.1449	-10.4699	0.892223	8.11862e-05	8.11862e-05	FDR<0.05	-0.118709	negligible	425.1	420.16	430.039	0.239435	0.137264	1.02351	0.890822	0.999945	Not Sig	nonsignificant	.	Y	beclin 1 [Source:RGD Symbol;Acc:620190]
Calm3	chr1	10458	6017	96.2236	100.147	-3.92373	0.96082	8.12228e-05	8.12228e-05	FDR<0.05	-0.0679067	negligible	1140.64	1134.58	1146.69	0.211352	0.072253	1.01067	0.942401	0.999945	Not Sig	nonsignificant	.	.	calmodulin 3 [Source:RGD Symbol;Acc:2259]
Nagpa	chr10	73	46	94.6542	160.197	-65.5425	0.590863	8.23609e-05	8.23609e-05	FDR<0.05	-0.831759	large	11.4882	11.0759	11.9006	0.901902	0.153883	1.07446	0.877702	0.999945	Not Sig	nonsignificant	.	.	N-acetylglucosamine-1-phosphodiester alpha-N-acetylglucosaminidase [Source:RGD Symbol;Acc:1308972]
Noc4l	chr12	815	522	101.729	125.067	-23.3379	0.813398	8.23661e-05	8.23661e-05	FDR<0.05	-0.210044	small	151.015	149.017	153.014	0.309939	0.123809	1.02682	0.901467	0.999945	Not Sig	nonsignificant	.	Y	nucleolar complex associated 4 homolog [Source:RGD Symbol;Acc:1310661]
Ankrd33b	chr2	292	88	125.396	85.7899	39.606	1.46166	8.28849e-05	8.28849e-05	FDR<0.05	0.4821	small	4.91547	3.98013	5.85081	1.34697	0.398788	1.47001	0.69005	0.999945	Not Sig	nonsignificant	.	Y	ankyrin repeat domain 33B [Source:RGD Symbol;Acc:1564227]
Gnpda1	chr18	494	444	89.5873	109.285	-19.6978	0.819757	8.3306e-05	8.3306e-05	FDR<0.05	-0.256686	small	107.181	117.44	96.9219	0.366836	-0.793945	0.825287	0.427227	0.999945	Not Sig	nonsignificant	.	Y	glucosamine-6-phosphate deaminase 1 [Source:RGD Symbol;Acc:1585624]
Sec22b	chr2	1432	977	101.223	114.645	-13.4218	0.882927	8.34084e-05	8.34084e-05	FDR<0.05	-0.140792	negligible	132.96	134.067	131.853	0.328739	-0.0917648	0.983489	0.926885	0.999945	Not Sig	nonsignificant	.	.	SEC22 homolog B, vesicle trafficking protein [Source:RGD Symbol;Acc:1309988]
Wdr45b	chr10	1439	679	141.298	126.716	14.5817	1.11507	8.4339e-05	8.4339e-05	FDR<0.05	0.190882	negligible	29.6698	20.4502	38.8893	0.617776	1.51298	1.90166	0.130285	0.999945	Not Sig	nonsignificant	.	Y	WD repeat domain 45B [Source:RGD Symbol;Acc:1305141]
Hax1	chr2	2347	1555	87.4323	96.088	-8.65566	0.909919	8.44893e-05	8.44893e-05	FDR<0.05	-0.152073	negligible	464.4	474.388	454.411	0.237204	-0.260205	0.957889	0.794705	0.999945	Not Sig	nonsignificant	.	.	HCLS1 associated protein X-1 [Source:RGD Symbol;Acc:727960]
Gosr2	chr10	1904	1342	95.4569	106.544	-11.0875	0.895936	8.5074e-05	8.5074e-05	FDR<0.05	-0.12455	negligible	288.883	298.455	279.312	0.279569	-0.355894	0.93586	0.72192	0.999945	Not Sig	nonsignificant	.	Y	golgi SNAP receptor complex member 2 [Source:RGD Symbol;Acc:62079]
Mrpl15	chr5	2650	2116	81.0306	89.1148	-8.08423	0.909283	8.51439e-05	8.51439e-05	FDR<0.05	-0.105498	negligible	589.208	650.638	527.779	0.237726	-1.27318	0.811171	0.202953	0.999945	Not Sig	nonsignificant	.	Y	mitochondrial ribosomal protein L15 [Source:RGD Symbol;Acc:1304796]
Arid5a	chr9	590	83	120.982	85.3913	35.5908	1.4168	8.52939e-05	8.52939e-05	FDR<0.05	0.373442	small	53.5426	14.7157	92.3695	0.599201	4.45479	6.27693	8.3976e-06	0.00295875	FDR<0.05	upregulated	.	.	AT-rich interaction domain 5A [Source:RGD Symbol;Acc:1311041]
Cnih1	chr15	3995	2503	96.5085	102.97	-6.46187	0.937245	8.67213e-05	8.67213e-05	FDR<0.05	-0.100097	negligible	767.019	735.478	798.559	0.221019	0.532154	1.08577	0.59462	0.999945	Not Sig	nonsignificant	.	.	cornichon family AMPA receptor auxiliary protein 1 [Source:RGD Symbol;Acc:1312030]
Nelfa	chr14	851	608	91.4122	109.916	-18.5043	0.831651	8.79326e-05	8.79326e-05	FDR<0.05	-0.235244	small	169.727	184.549	154.906	0.307008	-0.809067	0.839375	0.418477	0.999945	Not Sig	nonsignificant	.	Y	negative elongation factor complex member A [Source:RGD Symbol;Acc:1305556]
Fam136a	chr4	434	354	107.687	124.976	-17.2892	0.861659	8.81158e-05	8.81158e-05	FDR<0.05	-0.26539	small	86.8889	96.1509	77.6269	0.380807	-0.832041	0.807344	0.405386	0.999945	Not Sig	nonsignificant	.	.	family with sequence similarity 136, member A [Source:RGD Symbol;Acc:1304825]
LOC120093056	chr2	3631	2091	61.3433	67.1493	-5.80599	0.913536	8.8817e-05	8.8817e-05	FDR<0.05	-0.101185	negligible	107.698	103.56	111.836	0.352463	0.346408	1.07992	0.729036	0.999945	Not Sig	nonsignificant	.	.
Dido1	chr3	141	127	88.1927	141.41	-53.217	0.623668	8.88744e-05	8.88744e-05	FDR<0.05	-0.456227	small	24.9803	25.1638	24.7968	0.627711	-0.0618096	0.985415	0.950714	0.999945	Not Sig	nonsignificant	.	Y	death inducer-obliterator 1 [Source:RGD Symbol;Acc:1311173]
Cdc42	chr5	13211	8291	94.4845	99.1254	-4.64086	0.953182	8.99044e-05	8.99044e-05	FDR<0.05	-0.0533024	negligible	2171.68	2110.16	2233.2	0.208854	0.387097	1.05831	0.698685	0.999945	Not Sig	nonsignificant	.	.	cell division cycle 42 [Source:RGD Symbol;Acc:71043]
Ctnnd1	chr3	571	174	148.066	123.672	24.394	1.19725	9.01275e-05	9.01275e-05	FDR<0.05	0.320783	small	58.4833	39.4864	77.4803	0.500614	1.96217	1.9622	0.0497433	0.999945	Not Sig	nonsignificant	Y	.	catenin delta 1 [Source:RGD Symbol;Acc:1305643]
Rbmxl1	chr19	1179	780	80.6691	96.8533	-16.1842	0.8329	9.12733e-05	9.12733e-05	FDR<0.05	-0.139215	negligible	236.108	238.412	233.804	0.272079	-0.111958	0.980669	0.910857	0.999945	Not Sig	nonsignificant	.	.	Rbmx like 1 [Source:RGD Symbol;Acc:1306751]
Dmac1	chr5	972	747	81.1096	96.1743	-15.0646	0.843361	9.17781e-05	9.17781e-05	FDR<0.05	-0.177262	negligible	215.292	232.807	197.777	0.285798	-0.810779	0.849534	0.417492	0.999945	Not Sig	nonsignificant	.	.	distal membrane arm assembly component 1 [Source:RGD Symbol;Acc:1309148]
Cars	chr1	451	320	91.6618	111.112	-19.4499	0.824952	9.46846e-05	9.46846e-05	FDR<0.05	-0.280261	small	87.3234	87.0112	87.6356	0.375076	0.0470606	1.00718	0.962465	0.999945	Not Sig	nonsignificant	.	.
Tbpl1	chr1	1843	869	124.893	113.827	11.0656	1.09721	9.48535e-05	9.48535e-05	FDR<0.05	0.14299	negligible	296.876	247.212	346.541	0.298148	1.6209	1.4018	0.105038	0.999945	Not Sig	nonsignificant	.	Y	TATA-box binding protein like 1 [Source:RGD Symbol;Acc:1597456]
Acyp2	chr14	7053	4334	98.7115	104.981	-6.26976	0.940277	9.68342e-05	9.68342e-05	FDR<0.05	-0.0787322	negligible	1275.04	1196.93	1353.16	0.210293	0.843338	1.13053	0.399039	0.999945	Not Sig	nonsignificant	.	.	acylphosphatase 2 [Source:RGD Symbol;Acc:1595836]
Stmn2	chr2	14676	10666	101.178	105.299	-4.12111	0.960863	9.80777e-05	9.80777e-05	FDR<0.05	-0.0476381	negligible	1848.48	1921.79	1775.17	0.223902	-0.518097	0.923706	0.604391	0.999945	Not Sig	nonsignificant	.	Y	stathmin 2 [Source:RGD Symbol;Acc:68947]
Scoc	chr19	8505	5798	110.572	115.803	-5.23099	0.954829	9.94678e-05	9.94678e-05	FDR<0.05	-0.0605498	negligible	1683.26	1659.24	1707.27	0.238077	0.164821	1.02895	0.869085	0.999945	Not Sig	nonsignificant	.	Y	short coiled-coil protein [Source:RGD Symbol;Acc:1311860]
Slc39a7	chr20	1554	920	81.1711	91.0716	-9.90051	0.891289	9.96633e-05	9.96633e-05	FDR<0.05	-0.178808	negligible	289.965	272.555	307.375	0.265268	0.668636	1.12775	0.503727	0.999945	Not Sig	nonsignificant	.	.	solute carrier family 39 member 7 [Source:RGD Symbol;Acc:1593280]
Ddx47	chr4	924	660	102.099	120.792	-18.6932	0.845245	9.99102e-05	9.99102e-05	FDR<0.05	-0.195574	negligible	170.157	164.022	176.291	0.312007	0.308635	1.0748	0.757599	0.999945	Not Sig	nonsignificant	.	.	DEAD-box helicase 47 [Source:RGD Symbol;Acc:1310437]
Cct7	chr4	6466	4490	90.0458	95.5212	-5.4754	0.942679	0.00010016	0.00010016	FDR<0.05	-0.0855003	negligible	1266.49	1295.92	1237.06	0.222172	-0.310067	0.954581	0.75651	0.999945	Not Sig	nonsignificant	.	.	chaperonin containing TCP1 subunit 7 [Source:RGD Symbol;Acc:1306422]
Ngdn	chr15	1588	982	153.823	172.179	-18.356	0.89339	0.000100294	0.000100294	FDR<0.05	-0.154969	negligible	322.366	314.532	330.2	0.268531	0.251335	1.04982	0.801555	0.999945	Not Sig	nonsignificant	.	.	neuroguidin [Source:RGD Symbol;Acc:1310211]
Ube2i	chr10	1696	943	91.3975	104.176	-12.7781	0.877341	0.000100537	0.000100537	FDR<0.05	-0.170213	negligible	183.91	169.964	197.855	0.30669	0.73455	1.1641	0.462614	0.999945	Not Sig	nonsignificant	.	Y	ubiquitin-conjugating enzyme E2I [Source:RGD Symbol;Acc:3926]
Cct5	chr2	5885	3681	85.9423	92.131	-6.18868	0.932827	0.000102928	0.000102928	FDR<0.05	-0.07533	negligible	1154.03	1114.45	1193.61	0.220098	0.441364	1.07103	0.65895	0.999945	Not Sig	nonsignificant	.	.	chaperonin containing TCP1 subunit 5 [Source:RGD Symbol;Acc:735161]
Mzt1	chr15	710	522	99.2517	118.219	-18.9673	0.839558	0.000103635	0.000103635	FDR<0.05	-0.234333	small	145.438	153.025	137.852	0.316925	-0.49806	0.90085	0.618442	0.999945	Not Sig	nonsignificant	Y	Y	mitotic spindle organizing protein 1 [Source:RGD Symbol;Acc:1592140]
Eif3m	chr3	3408	2209	75.4426	81.6468	-6.20424	0.924011	0.000103686	0.000103686	FDR<0.05	-0.0950918	negligible	688.517	659.097	717.938	0.234735	0.519414	1.08927	0.603472	0.999945	Not Sig	nonsignificant	.	.	eukaryotic translation initiation factor 3, subunit M [Source:RGD Symbol;Acc:1565840]
Sf1	chr1	712	275	139.441	115.3	24.1408	1.20937	0.00010375	0.00010375	FDR<0.05	0.250281	small	83.0081	60.8265	105.19	0.414996	1.94168	1.72934	0.0521764	0.999945	Not Sig	nonsignificant	.	.	splicing factor 1 [Source:RGD Symbol;Acc:620645]
Mrps36	chr2	4698	3030	88.077	93.4119	-5.33491	0.942888	0.00010707	0.00010707	FDR<0.05	-0.0920062	negligible	703.327	683.109	723.545	0.223152	0.365971	1.05919	0.714387	0.999945	Not Sig	nonsignificant	.	.	mitochondrial ribosomal protein S36 [Source:RGD Symbol;Acc:1309315]
Tm2d2	chr16	3172	2107	88.5701	97.8623	-9.29217	0.905049	0.000107665	0.000107665	FDR<0.05	-0.0860272	negligible	627.617	633.515	621.72	0.228842	-0.122929	0.981382	0.902163	0.999945	Not Sig	nonsignificant	.	Y	TM2 domain containing 2 [Source:RGD Symbol;Acc:1306769]
Naa20	chr3	2463	1694	95.3806	104.999	-9.61858	0.908394	0.000107835	0.000107835	FDR<0.05	-0.127818	negligible	446.813	455.197	438.428	0.242787	-0.235261	0.96316	0.814006	0.999945	Not Sig	nonsignificant	.	Y	N(alpha)-acetyltransferase 20, NatB catalytic subunit [Source:RGD Symbol;Acc:1307713]
Gtf3c6	chr20	824	596	66.3411	80.9944	-14.6532	0.819084	0.000109027	0.000109027	FDR<0.05	-0.19399	negligible	104.011	100.943	107.079	0.364927	0.211667	1.06079	0.832367	0.999945	Not Sig	nonsignificant	Y	.	general transcription factor 3C subunit 6 [Source:RGD Symbol;Acc:1307434]
Rpl10a	chr20	13039	8225	82.3356	85.4044	-3.06887	0.964067	0.000109098	0.000109098	FDR<0.05	-0.0592465	negligible	206.212	183.424	228.999	0.282088	1.13153	1.24847	0.257833	0.999945	Not Sig	nonsignificant	.	.	ribosomal protein L10A [Source:RGD Symbol;Acc:620497]
Aurkaip1	chr5	3222	2255	83.358	89.6767	-6.31873	0.929539	0.000109478	0.000109478	FDR<0.05	-0.103022	negligible	591.169	601.202	581.136	0.227452	-0.2202	0.966623	0.825716	0.999945	Not Sig	nonsignificant	.	.
Klhl22	chr11	975	742	79.6705	94.9997	-15.3292	0.838639	0.000109514	0.000109514	FDR<0.05	-0.179001	negligible	207.772	217.544	198.001	0.294677	-0.478066	0.910166	0.632603	0.999945	Not Sig	nonsignificant	.	.	kelch-like family member 22 [Source:RGD Symbol;Acc:1306288]
Ubald1	chr10	1073	414	113.269	99.5084	13.7603	1.13828	0.000109686	0.000109686	FDR<0.05	0.223678	small	114.936	92.6655	137.207	0.41463	1.42209	1.48067	0.155	0.999945	Not Sig	nonsignificant	.	.	UBA-like domain containing 1 [Source:RGD Symbol;Acc:1359443]
Mpc2	chr13	5448	3165	95.859	103.13	-7.27085	0.929498	0.000110673	0.000110673	FDR<0.05	-0.0891231	negligible	925.358	850.79	999.926	0.221126	1.06083	1.17529	0.288768	0.999945	Not Sig	nonsignificant	.	.	mitochondrial pyruvate carrier 2 [Source:RGD Symbol;Acc:1563422]
Penk	chr5	1519	755	109.54	99.924	9.61564	1.09623	0.000110895	0.000110895	FDR<0.05	0.166804	negligible	240.386	216.392	264.38	0.293292	0.97374	1.22176	0.330186	0.999945	Not Sig	nonsignificant	.	.	proenkephalin [Source:RGD Symbol;Acc:68946]
Nmt1	chr10	2542	1621	87.0303	97.642	-10.6116	0.891321	0.000111682	0.000111682	FDR<0.05	-0.135612	negligible	405.457	377.169	433.744	0.278394	0.699823	1.15	0.484038	0.999945	Not Sig	nonsignificant	Y	.	N-myristoyltransferase 1 [Source:RGD Symbol;Acc:628642]
Gsto1	chr1	3359	1870	93.6998	102.796	-9.09616	0.911512	0.000111865	0.000111865	FDR<0.05	-0.113169	negligible	606.399	539.642	673.156	0.22901	1.38617	1.24741	0.165696	0.999945	Not Sig	nonsignificant	.	.	glutathione S-transferase omega 1 [Source:RGD Symbol;Acc:70952]
Mrpl58	chr10	1677	1174	101.775	113.114	-11.3387	0.899758	0.000112456	0.000112456	FDR<0.05	-0.14202	negligible	320.136	336.709	303.564	0.252589	-0.58871	0.901563	0.556056	0.999945	Not Sig	nonsignificant	.	.	mitochondrial ribosomal protein L58 [Source:RGD Symbol;Acc:1307942]
Ndufa9	chr4	4131	2792	84.8213	91.4377	-6.61635	0.927641	0.000113583	0.000113583	FDR<0.05	-0.0868382	negligible	803.076	781.804	824.348	0.237604	0.307783	1.05442	0.758248	0.999945	Not Sig	nonsignificant	.	Y	NADH:ubiquinone oxidoreductase subunit A9 [Source:RGD Symbol;Acc:1307307]
Aup1	chr4	2735	1693	90.186	100.193	-10.0069	0.900123	0.000113869	0.000113869	FDR<0.05	-0.113083	negligible	529.294	500.131	558.457	0.237264	0.659888	1.11662	0.509326	0.999945	Not Sig	nonsignificant	.	.	AUP1, lipid droplet regulating VLDL assembly factor [Source:RGD Symbol;Acc:1591777]
Thap12	chr1	119	100	80.6464	114.171	-33.5242	0.706368	0.000114746	0.000114746	FDR<0.05	-0.477954	small	9.09897	10.6045	7.5934	1.01062	-0.443187	0.716052	0.65763	0.999945	Not Sig	nonsignificant	.	Y	THAP domain containing 12 [Source:RGD Symbol;Acc:1309679]
Rpp21	chr20	1396	968	110.075	120.407	-10.3312	0.914197	0.000115242	0.000115242	FDR<0.05	-0.141127	negligible	247.303	246.686	247.92	0.268993	0.0329738	1.005	0.973695	0.999945	Not Sig	nonsignificant	.	.	ribonuclease P/MRP subunit p21 [Source:RGD Symbol;Acc:1303090]
Mrps18c	chr14	2478	1536	73.0599	79.7002	-6.64028	0.916684	0.000119999	0.000119999	FDR<0.05	-0.126097	negligible	429.246	412.12	446.373	0.243118	0.482554	1.08311	0.629412	0.999945	Not Sig	nonsignificant	.	Y	mitochondrial ribosomal protein S18C [Source:RGD Symbol;Acc:1307997]
Mkks	chr3	3116	2234	93.6804	100.263	-6.58256	0.934347	0.000120323	0.000120323	FDR<0.05	-0.107059	negligible	68.8671	73.0289	64.7053	0.421186	-0.412852	0.886023	0.679715	0.999945	Not Sig	nonsignificant	.	.	MKKS centrosomal shuttling protein [Source:RGD Symbol;Acc:1308814]
LOC691807	chr2	3853	2619	103.445	111.612	-8.16729	0.926824	0.000120724	0.000120724	FDR<0.05	-0.111885	negligible	794.822	806.647	782.997	0.218254	-0.199056	0.970681	0.842219	0.999945	Not Sig	nonsignificant	.	.
Rab9b	chrX	318	223	96.3993	124.775	-28.3756	0.772586	0.000122684	0.000122684	FDR<0.05	-0.310167	small	49.5631	48.8607	50.2655	0.476848	0.0790397	1.02875	0.937001	0.999945	Not Sig	nonsignificant	.	Y	RAB9B, member RAS oncogene family [Source:RGD Symbol;Acc:1562951]
LOC100360470	chr7	317	202	104.688	129.858	-25.1691	0.806179	0.000124382	0.000124382	FDR<0.05	-0.296485	small	12.7148	12.3589	13.0707	0.86087	0.133854	1.0576	0.893518	0.999945	Not Sig	nonsignificant	.	.
Lzts3	chr3	681	426	98.9759	126.076	-27.1006	0.785047	0.000129325	0.000129325	FDR<0.05	-0.250362	small	46.6961	50.2219	43.1703	0.478723	-0.441886	0.859591	0.658571	0.999945	Not Sig	nonsignificant	.	Y	leucine zipper tumor suppressor family member 3 [Source:RGD Symbol;Acc:631327]
Tmsb10	chr4	23407	14638	87.8951	90.1119	-2.21684	0.975399	0.000129818	0.000129818	FDR<0.05	-0.0352755	negligible	4266.38	4192.56	4340.19	0.209506	0.241025	1.03521	0.809536	0.999945	Not Sig	nonsignificant	.	.	thymosin, beta 10 [Source:RGD Symbol;Acc:62022]
Igsf8	chr13	1252	745	90.3638	104.402	-14.038	0.865539	0.000130115	0.000130115	FDR<0.05	-0.17406	negligible	159.674	156.373	162.975	0.347161	0.207808	1.04222	0.835379	0.999945	Not Sig	nonsignificant	.	Y	immunoglobulin superfamily, member 8 [Source:RGD Symbol;Acc:1311500]
Pomp	chr12	13250	8650	73.2701	76.0921	-2.82198	0.962914	0.000131488	0.000131488	FDR<0.05	-0.0657367	negligible	2447.25	2443.13	2451.37	0.202118	0.0261237	1.00337	0.979159	0.999945	Not Sig	nonsignificant	.	.	proteasome maturation protein [Source:RGD Symbol;Acc:1305831]
Uqcc1	chr3	984	766	95.7677	110.488	-14.7206	0.866768	0.000131554	0.000131554	FDR<0.05	-0.205977	small	205.354	215.868	194.84	0.283402	-0.533499	0.902592	0.593689	0.999945	Not Sig	nonsignificant	.	.	ubiquinol-cytochrome c reductase complex assembly factor 1 [Source:RGD Symbol;Acc:1585681]
Pes1	chr14	864	588	83.5875	97.9863	-14.3988	0.853053	0.000132295	0.000132295	FDR<0.05	-0.214316	small	174.529	167.163	181.894	0.294438	0.411153	1.08812	0.68096	0.999945	Not Sig	nonsignificant	.	.	pescadillo ribosomal biogenesis factor 1 [Source:RGD Symbol;Acc:1559814]
Cd2bp2	chr1	1405	957	112.705	125.829	-13.1238	0.895701	0.000134105	0.000134105	FDR<0.05	-0.154465	negligible	260.977	250.957	270.997	0.296829	0.344464	1.07985	0.730497	0.999945	Not Sig	nonsignificant	.	.	Cd2 (cytoplasmic tail) binding protein 2 [Source:RGD Symbol;Acc:1311741]
Alkbh4	chr12	88	107	63.7425	98.5184	-34.776	0.647011	0.000134857	0.000134857	FDR<0.05	-0.496717	small	22.8725	26.525	19.22	0.647742	-0.71607	0.724597	0.473948	0.999945	Not Sig	nonsignificant	.	.	alkB homolog 4, lysine demethylase [Source:RGD Symbol;Acc:1308608]
Mrpl23	chr1	2365	1557	79.2357	87.0569	-7.82118	0.91016	0.000136939	0.000136939	FDR<0.05	-0.120772	negligible	436.815	427.334	446.296	0.237807	0.263611	1.04437	0.79208	0.999945	Not Sig	nonsignificant	.	.	mitochondrial ribosomal protein L23 [Source:RGD Symbol;Acc:68343]
Zbtb18	chr13	1354	1078	96.177	106.351	-10.1744	0.904333	0.000137088	0.000137088	FDR<0.05	-0.163709	negligible	91.9502	109.112	74.7883	0.384104	-1.43644	0.685426	0.150877	0.999945	Not Sig	nonsignificant	.	Y	zinc finger and BTB domain containing 18 [Source:RGD Symbol;Acc:621548]
Nap1l5	chr4	1428	887	130.239	117.492	12.7468	1.10849	0.000137293	0.000137293	FDR<0.05	0.188009	negligible	257.33	238.806	275.855	0.268608	0.762013	1.15514	0.446052	0.999945	Not Sig	nonsignificant	.	Y	nucleosome assembly protein 1-like 5 [Source:RGD Symbol;Acc:1584123]
Nr2c2ap	chr16	2077	1403	97.967	107.335	-9.36759	0.912725	0.000140404	0.000140404	FDR<0.05	-0.123431	negligible	407.985	421.234	394.736	0.241065	-0.393005	0.937093	0.694316	0.999945	Not Sig	nonsignificant	Y	.	nuclear receptor 2C2-associated protein [Source:RGD Symbol;Acc:1561190]
Syngr1	chr7	1059	659	110.312	125.43	-15.1177	0.879473	0.000141294	0.000141294	FDR<0.05	-0.158454	negligible	91.5295	84.8911	98.168	0.369591	0.560619	1.1564	0.575058	0.999945	Not Sig	nonsignificant	.	.	synaptogyrin 1 [Source:RGD Symbol;Acc:3801]
Etfb	chr1	3011	1852	71.4103	77.3834	-5.97307	0.922812	0.000143523	0.000143523	FDR<0.05	-0.12357	negligible	576.755	569.353	584.156	0.277461	0.150713	1.026	0.880202	0.999945	Not Sig	nonsignificant	.	.	electron transfer flavoprotein subunit beta [Source:RGD Symbol;Acc:1303312]
Zfp414	chr7	751	518	106.507	125.826	-19.3182	0.846469	0.00014414	0.00014414	FDR<0.05	-0.237458	small	153.046	158.182	147.91	0.309436	-0.321003	0.935061	0.748208	0.999945	Not Sig	nonsignificant	.	.
LOC100362814	chr3	404	301	97.2838	124.35	-27.0659	0.78234	0.00014534	0.00014534	FDR<0.05	-0.304164	small	11.0682	10.186	11.9503	0.907819	0.228002	1.17321	0.819645	0.999945	Not Sig	nonsignificant	.	Y	RIKEN cDNA D430041D05 gene [Source:MGI Symbol;Acc:MGI:2181743]
Strada	chr10	552	320	111.183	133.965	-22.7814	0.829945	0.000148068	0.000148068	FDR<0.05	-0.271419	small	103.582	96.1509	111.013	0.364428	0.545991	1.15457	0.585072	0.999945	Not Sig	nonsignificant	.	.	STE20 related adaptor alpha [Source:RGD Symbol;Acc:727905]
Eif1ad	chr1	1403	936	91.6548	103.107	-11.4524	0.888927	0.000149031	0.000149031	FDR<0.05	-0.137377	negligible	277.995	277.819	278.17	0.265011	0.0204647	1.00127	0.983673	0.999945	Not Sig	nonsignificant	.	.	eukaryotic translation initiation factor 1A domain containing [Source:RGD Symbol;Acc:1304686]
Serpini1	chr2	3831	2613	119.642	128.824	-9.18241	0.928721	0.000149316	0.000149316	FDR<0.05	-0.0922909	negligible	739.024	742.686	735.363	0.264139	-0.0685262	0.990139	0.945367	0.999945	Not Sig	nonsignificant	.	.	serpin family I member 1 [Source:RGD Symbol;Acc:619896]
Emc2	chr7	3052	2198	99.4324	108.727	-9.29477	0.914513	0.000150862	0.000150862	FDR<0.05	-0.116926	negligible	613.079	630.583	595.574	0.231601	-0.364976	0.944482	0.71513	0.999945	Not Sig	nonsignificant	.	.	ER membrane protein complex subunit 2 [Source:RGD Symbol;Acc:1310430]
Itpa	chr3	1221	794	104.941	119.064	-14.1228	0.881385	0.00015126	0.00015126	FDR<0.05	-0.186874	negligible	217.248	210.577	223.92	0.277753	0.32605	1.06336	0.744386	0.999945	Not Sig	nonsignificant	.	.	inosine triphosphatase [Source:RGD Symbol;Acc:1589751]
Rfc4	chr11	810	497	108.432	129.374	-20.9423	0.838126	0.000151749	0.000151749	FDR<0.05	-0.213944	small	158.422	142.917	173.927	0.305916	0.909487	1.21698	0.363093	0.999945	Not Sig	nonsignificant	.	Y	replication factor C subunit 4 [Source:RGD Symbol;Acc:1310142]
Tmem106b	chr4	898	602	86.9493	102.026	-15.0767	0.852227	0.000152403	0.000152403	FDR<0.05	-0.162704	negligible	145.632	144.722	146.542	0.315116	0.0774761	1.01257	0.938245	0.999945	Not Sig	nonsignificant	.	.	transmembrane protein 106B [Source:RGD Symbol;Acc:1303037]
Tipin	chr8	756	640	92.1055	108.911	-16.8056	0.845695	0.000154502	0.000154502	FDR<0.05	-0.180734	negligible	106.718	114.35	99.0868	0.382781	-0.571588	0.866523	0.567601	0.999945	Not Sig	nonsignificant	.	Y	timeless interacting protein [Source:RGD Symbol;Acc:1564084]
Camk2b	chr14	5331	2869	98.101	106.524	-8.4228	0.92093	0.000155239	0.000155239	FDR<0.05	-0.0639071	negligible	597.256	533.9	660.613	0.267084	1.16931	1.23733	0.242279	0.999945	Not Sig	nonsignificant	.	Y	calcium/calmodulin-dependent protein kinase II beta [Source:RGD Symbol;Acc:2262]
Slc20a1	chr3	1366	764	123.968	112.295	11.6737	1.10396	0.000156456	0.000156456	FDR<0.05	0.183325	negligible	232.924	210.108	255.741	0.302589	0.923632	1.21719	0.355678	0.999945	Not Sig	nonsignificant	.	Y	solute carrier family 20 member 1 [Source:RGD Symbol;Acc:621079]
Nsfl1c	chr3	2145	1394	82.2683	92.0733	-9.80508	0.893508	0.000157276	0.000157276	FDR<0.05	-0.143444	negligible	420.672	397.563	443.782	0.239545	0.661167	1.11626	0.508505	0.999945	Not Sig	nonsignificant	.	.	NSFL1 cofactor [Source:RGD Symbol;Acc:619952]
Snx6	chr6	766	608	94.3968	110.148	-15.751	0.857001	0.000158953	0.000158953	FDR<0.05	-0.189859	negligible	174.077	178.634	169.519	0.327258	-0.263714	0.948972	0.792001	0.999945	Not Sig	nonsignificant	.	.	sorting nexin 6 [Source:RGD Symbol;Acc:1304647]
LOC679739	chr1	10707	6644	80.3102	83.5055	-3.19527	0.961736	0.000159834	0.000159834	FDR<0.05	-0.072842	negligible	1816.51	1761.56	1871.46	0.219685	0.403562	1.06239	0.686534	0.999945	Not Sig	nonsignificant	.	.
Eif4h	chr12	2015	1204	92.4991	102.696	-10.1967	0.900709	0.000161075	0.000161075	FDR<0.05	-0.109534	negligible	273.968	257.84	290.096	0.267732	0.649775	1.1251	0.515838	0.999945	Not Sig	nonsignificant	.	.	eukaryotic translation initiation factor 4H [Source:RGD Symbol;Acc:1359222]
Rogdi	chr10	5140	3232	108.331	117.118	-8.78766	0.924968	0.000162476	0.000162476	FDR<0.05	-0.0763214	negligible	1000.68	969.672	1031.69	0.212668	0.420943	1.06396	0.673797	0.999945	Not Sig	nonsignificant	.	.	rogdi atypical leucine zipper [Source:RGD Symbol;Acc:1560021]
Rmdn3	chr3	879	631	87.9263	102.627	-14.7006	0.856757	0.000163519	0.000163519	FDR<0.05	-0.179555	negligible	186.345	189.998	182.692	0.297931	-0.210016	0.961548	0.833655	0.999945	Not Sig	nonsignificant	.	.	regulator of microtubule dynamics 3 [Source:RGD Symbol;Acc:1308697]
Ppil1	chr20	965	740	87.4447	102.461	-15.0158	0.853448	0.000164523	0.000164523	FDR<0.05	-0.204662	small	198.785	212.464	185.105	0.293113	-0.7013	0.87123	0.483116	0.999945	Not Sig	nonsignificant	.	.	peptidylprolyl isomerase like 1 [Source:RGD Symbol;Acc:1309119]
Erc2	chr16	570	368	94.0856	116.425	-22.3398	0.808119	0.000164548	0.000164548	FDR<0.05	-0.218297	small	62.0726	57.4233	66.7219	0.440024	0.473188	1.16193	0.636079	0.999945	Not Sig	nonsignificant	.	Y	ELKS/RAB6-interacting/CAST family member 2 [Source:RGD Symbol;Acc:708372]
Slc35a4	chr18	914	695	86.6555	100.727	-14.0717	0.860299	0.000165098	0.000165098	FDR<0.05	-0.153832	negligible	173.839	184.631	163.046	0.329694	-0.577971	0.883092	0.563283	0.999945	Not Sig	nonsignificant	.	.	solute carrier family 35, member A4 [Source:RGD Symbol;Acc:628792]
Anapc10	chr19	271	228	84.0759	107.253	-23.1768	0.783905	0.000166083	0.000166083	FDR<0.05	-0.322494	small	60.5407	67.0069	54.0744	0.452723	-0.700339	0.806997	0.483716	0.999945	Not Sig	nonsignificant	Y	.	anaphase promoting complex subunit 10 [Source:RGD Symbol;Acc:1308936]
Rita1	chr12	530	377	106.446	128.218	-21.7722	0.830194	0.000167283	0.000167283	FDR<0.05	-0.213838	small	90.8489	88.6345	93.0632	0.370386	0.214347	1.04997	0.830277	0.999945	Not Sig	nonsignificant	.	.	RBPJ interacting and tubulin associated 1 [Source:RGD Symbol;Acc:1306772]
Ap1b1	chr14	844	519	98.1933	113.607	-15.4134	0.864327	0.000167807	0.000167807	FDR<0.05	-0.23377	small	153.109	151.137	155.082	0.315529	0.140589	1.0261	0.888195	0.999945	Not Sig	nonsignificant	.	Y	adaptor related protein complex 1 subunit beta 1 [Source:RGD Symbol;Acc:2064]
ND2	chrM	71846	50052	51.6175	52.0363	-0.418758	0.991953	0.000170032	0.000170032	FDR<0.05	-0.00859654	negligible	7462.73	7766.17	7159.29	0.195904	-0.599212	0.921856	0.549032	0.999945	Not Sig	nonsignificant	.	.	mitochondrially encoded NADH:ubiquinone oxidoreductase core subunit 2 [Source:RGD Symbol;Acc:620556]
Adat2	chr1	185	140	92.2811	129.447	-37.1661	0.712886	0.000170634	0.000170634	FDR<0.05	-0.32613	small	4.41329	3.2995	5.52707	1.52801	0.417217	1.67512	0.67652	0.999945	Not Sig	nonsignificant	Y	.	adenosine deaminase, tRNA-specific 2 [Source:RGD Symbol;Acc:1309642]
Rplp0	chr12	20433	13670	73.9797	76.1434	-2.16372	0.971584	0.000170692	0.000170692	FDR<0.05	-0.044432	negligible	4148.74	4153.21	4144.27	0.19729	-0.0157803	0.997847	0.98741	0.999945	Not Sig	nonsignificant	.	.	ribosomal protein lateral stalk subunit P0 [Source:RGD Symbol;Acc:621247]
Sez6l	chr12	659	480	93.2095	109.234	-16.0242	0.853304	0.000174286	0.000174286	FDR<0.05	-0.20364	small	77.2014	85.9374	68.4654	0.394125	-0.808288	0.796689	0.418925	0.999945	Not Sig	nonsignificant	.	.	seizure related 6 homolog like [Source:RGD Symbol;Acc:1563628]
Tac3	chr7	1648	846	94.9715	105.233	-10.2616	0.902487	0.000176788	0.000176788	FDR<0.05	-0.155049	negligible	155.995	134.329	177.662	0.313987	1.25494	1.32259	0.2095	0.999945	Not Sig	nonsignificant	.	.	tachykinin precursor 3 [Source:RGD Symbol;Acc:3809]
LOC103693135	chr14	368	206	105.447	132.246	-26.7985	0.797358	0.000177385	0.000177385	FDR<0.05	-0.277129	small	4.28224	3.03741	5.52707	1.44225	0.606492	1.81967	0.544188	0.999945	Not Sig	nonsignificant	.	.
Gabrg2	chr10	1420	925	88.0504	100.922	-12.872	0.872456	0.000180081	0.000180081	FDR<0.05	-0.162485	negligible	63.384	64.1788	62.5893	0.429363	-0.0924263	0.975233	0.926359	0.999945	Not Sig	nonsignificant	.	.	gamma-aminobutyric acid type A receptor subunit gamma 2 [Source:RGD Symbol;Acc:61966]
Vmp1	chr10	2976	1897	88.0461	96.8308	-8.78465	0.909278	0.000181447	0.000181447	FDR<0.05	-0.0916702	negligible	560.865	537.734	583.997	0.242859	0.473955	1.08603	0.635532	0.999945	Not Sig	nonsignificant	.	.	vacuole membrane protein 1 [Source:RGD Symbol;Acc:70367]
Exosc4	chr7	1475	1000	76.4324	84.7962	-8.36383	0.901366	0.000181725	0.000181725	FDR<0.05	-0.158305	negligible	281.464	289.863	273.065	0.270134	-0.301116	0.942049	0.763326	0.999945	Not Sig	nonsignificant	.	.	exosome component 4 [Source:RGD Symbol;Acc:1310986]
Cdpf1	chr7	384	293	94.9408	115.725	-20.7846	0.820397	0.000185328	0.000185328	FDR<0.05	-0.279131	small	80.8958	79.759	82.0326	0.41898	0.0786755	1.02851	0.937291	0.999945	Not Sig	nonsignificant	.	.	cysteine rich, DPF motif domain containing 1 [Source:RGD Symbol;Acc:1306001]
Tcf25	chr19	3185	2132	97.2938	107.324	-10.0306	0.906539	0.000186895	0.000186895	FDR<0.05	-0.0961836	negligible	548.305	548.387	548.222	0.229452	-0.00448328	0.9997	0.996423	0.999945	Not Sig	nonsignificant	.	.	transcription factor 25 [Source:RGD Symbol;Acc:1309054]
Scn2a	chr3	668	429	86.5318	106.294	-19.7622	0.81408	0.000187344	0.000187344	FDR<0.05	-0.21944	small	56.5101	54.4642	58.5561	0.448058	0.230803	1.07513	0.817468	0.999945	Not Sig	nonsignificant	.	Y	sodium voltage-gated channel alpha subunit 2 [Source:RGD Symbol;Acc:3632]
Tnfaip8	chr18	565	442	78.5075	94.342	-15.8345	0.832159	0.000187774	0.000187774	FDR<0.05	-0.28363	small	106.617	116.364	96.8704	0.399185	-0.662806	0.832475	0.507455	0.999945	Not Sig	nonsignificant	.	.	TNF alpha induced protein 8 [Source:RGD Symbol;Acc:1305908]
Arhgef7	chr16	606	251	127.664	107.336	20.3282	1.18939	0.000187872	0.000187872	FDR<0.05	0.276761	small	64.3463	54.1767	74.516	0.426819	1.05112	1.37543	0.293202	0.999945	Not Sig	nonsignificant	.	.	Rho guanine nucleotide exchange factor 7 [Source:RGD Symbol;Acc:620624]
Trim27	chr17	109	78	123.799	80.6134	43.1861	1.53572	0.000190993	0.000190993	FDR<0.05	0.534364	medium	12.1944	14.9778	9.41103	0.868668	-0.780794	0.628333	0.434923	0.999945	Not Sig	nonsignificant	.	.	tripartite motif-containing 27 [Source:RGD Symbol;Acc:1310105]
Psmd6	chr15	5267	3618	95.0838	101.732	-6.64776	0.934654	0.0001918	0.0001918	FDR<0.05	-0.0857204	negligible	1106.84	1125.92	1087.75	0.225255	-0.229327	0.966097	0.818615	0.999945	Not Sig	nonsignificant	.	.	proteasome 26S subunit, non-ATPase 6 [Source:RGD Symbol;Acc:735127]
Rab7a	chr4	6417	4245	92.3811	98.6134	-6.23232	0.9368	0.000194688	0.000194688	FDR<0.05	-0.0769845	negligible	1324.8	1311.34	1338.26	0.210794	0.134654	1.02054	0.892886	0.999945	Not Sig	nonsignificant	.	Y	RAB7A, member RAS oncogene family [Source:RGD Symbol;Acc:61908]
Abce1	chr19	886	584	86.5178	101.391	-14.8731	0.85331	0.000195613	0.000195613	FDR<0.05	-0.17441	negligible	166.676	157.607	175.744	0.309948	0.479088	1.11508	0.631876	0.999945	Not Sig	nonsignificant	Y	.	ATP binding cassette subfamily E member 1 [Source:RGD Symbol;Acc:1305301]
Mgst3	chr13	12691	9474	96.7513	99.9343	-3.18301	0.968149	0.000195655	0.000195655	FDR<0.05	-0.0453321	negligible	2416.42	2525.58	2307.26	0.20675	-0.634338	0.913558	0.52586	0.999945	Not Sig	nonsignificant	.	.	microsomal glutathione S-transferase 3 [Source:RGD Symbol;Acc:1306373]
Actr10	chr6	2862	2039	92.4879	100.719	-8.23108	0.918277	0.000196124	0.000196124	FDR<0.05	-0.112589	negligible	564.057	570.832	557.282	0.252599	-0.154252	0.976261	0.877411	0.999945	Not Sig	nonsignificant	.	.	actin related protein 10 [Source:RGD Symbol;Acc:1306515]
Ubl4a	chrX	1443	1035	94.9778	106.023	-11.0449	0.895825	0.000196386	0.000196386	FDR<0.05	-0.138307	negligible	170.134	174.234	166.034	0.308566	-0.239141	0.952938	0.810996	0.999945	Not Sig	nonsignificant	.	.	ubiquitin-like 4A [Source:RGD Symbol;Acc:1563983]
LOC100912991	chrX	324	212	99.3774	127.799	-28.4214	0.777608	0.000196926	0.000196926	FDR<0.05	-0.269227	small	56.7683	55.3286	58.2079	0.440336	0.14537	1.05204	0.884418	0.999945	Not Sig	nonsignificant	.	.	uncharacterized LOC100912991 [Source:RGD Symbol;Acc:6485055]
Mocs2	chr2	3281	2179	82.5959	89.4989	-6.90301	0.92287	0.00019787	0.00019787	FDR<0.05	-0.109341	negligible	637.252	633.99	640.513	0.241015	0.0455152	1.01029	0.963697	0.999945	Not Sig	nonsignificant	.	Y	molybdenum cofactor synthesis 2 [Source:RGD Symbol;Acc:1359477]
Spock2	chr20	4011	2678	100.697	107.63	-6.93254	0.935589	0.000197954	0.000197954	FDR<0.05	-0.0798612	negligible	103.655	103.168	104.142	0.354693	0.0167069	1.00944	0.98667	0.999945	Not Sig	nonsignificant	.	Y	SPARC/osteonectin, cwcv and kazal like domains proteoglycan 2 [Source:RGD Symbol;Acc:1308568]
Max	chr6	1702	1177	74.2336	85.8467	-11.6131	0.864722	0.000198048	0.000198048	FDR<0.05	-0.121487	negligible	338.979	335.559	342.398	0.279338	0.0900752	1.02038	0.928227	0.999945	Not Sig	nonsignificant	.	Y	MYC associated factor X [Source:RGD Symbol;Acc:621101]
LOC499331	chr1	74	40	108.873	166.585	-57.7121	0.653557	0.00019925	0.00019925	FDR<0.05	-0.759022	medium	6.53132	6.41514	6.6475	1.17239	0.0726088	1.03622	0.942117	0.999945	Not Sig	nonsignificant	.	.
Stx5	chr1	737	490	101.953	120.764	-18.8105	0.844237	0.000200266	0.000200266	FDR<0.05	-0.210237	small	147.29	148.861	145.72	0.310686	-0.110701	0.9789	0.911854	0.999945	Not Sig	nonsignificant	.	.	syntaxin 5 [Source:RGD Symbol;Acc:68426]
Timm9	chr6	1469	970	119.414	132.819	-13.405	0.899074	0.000203079	0.000203079	FDR<0.05	-0.149653	negligible	285.816	281.042	290.591	0.269499	0.163675	1.03398	0.869987	0.999945	Not Sig	nonsignificant	.	.	translocase of inner mitochondrial membrane 9 [Source:RGD Symbol;Acc:621656]
Txn1	chr5	9917	6316	81.7302	85.714	-3.98376	0.953523	0.000203233	0.000203233	FDR<0.05	-0.0626898	negligible	80.5075	73.5531	87.462	0.382857	0.642156	1.1891	0.520772	0.999945	Not Sig	nonsignificant	.	.	thioredoxin 1 [Source:RGD Symbol;Acc:621157]
Bpgm	chr4	2622	1769	83.256	91.756	-8.50003	0.907363	0.000203253	0.000203253	FDR<0.05	-0.106064	negligible	532.062	532.234	531.89	0.238129	-0.0172391	0.999353	0.986246	0.999945	Not Sig	nonsignificant	.	.	bisphosphoglycerate mutase [Source:RGD Symbol;Acc:735018]
Snrpd3	chr20	3962	2786	96.1383	102.858	-6.71948	0.934672	0.000203567	0.000203567	FDR<0.05	-0.103455	negligible	790.4	785.28	795.521	0.217992	0.0853222	1.01304	0.932005	0.999945	Not Sig	nonsignificant	.	.	small nuclear ribonucleoprotein D3 polypeptide [Source:RGD Symbol;Acc:1597573]
LOC102555317	chr8	330	277	71.7877	93.7606	-21.9728	0.765649	0.000203683	0.000203683	FDR<0.05	-0.326494	small	39.5473	43.9907	35.104	0.510729	-0.659449	0.797987	0.509607	0.999945	Not Sig	nonsignificant	.	.	zinc finger protein 120-like [Source:RGD Symbol;Acc:7496161]
Pnma3	chrX	353	238	96.2485	129.25	-33.0014	0.74467	0.000204421	0.000204421	FDR<0.05	-0.271413	small	19.284	15.2399	23.3282	0.725029	0.792753	1.53073	0.427922	0.999945	Not Sig	nonsignificant	.	.	PNMA family member 3 [Source:RGD Symbol;Acc:1563752]
Uqcrc2	chr1	6270	4161	110.067	117.358	-7.2906	0.937877	0.000206913	0.000206913	FDR<0.05	-0.0734609	negligible	1304.63	1275.1	1334.15	0.215634	0.296478	1.04632	0.766865	0.999945	Not Sig	nonsignificant	.	.	ubiquinol cytochrome c reductase core protein 2 [Source:RGD Symbol;Acc:1359150]
St13	chr7	2209	1593	89.2996	98.1472	-8.84762	0.909854	0.000209454	0.000209454	FDR<0.05	-0.137529	negligible	355.338	352.788	357.888	0.249178	0.0739727	1.01446	0.941032	0.999945	Not Sig	nonsignificant	.	.
Gabra2	chr14	1869	1244	97.6982	110.293	-12.5944	0.88581	0.000210341	0.000210341	FDR<0.05	-0.106212	negligible	328.172	323.253	333.09	0.26218	0.144839	1.03043	0.884838	0.999945	Not Sig	nonsignificant	.	Y	gamma-aminobutyric acid type A receptor subunit alpha 2 [Source:RGD Symbol;Acc:61856]
Isca1	chr17	8190	3998	99.5644	106.311	-6.7462	0.936543	0.000210357	0.000210357	FDR<0.05	-0.0728524	negligible	1307.53	1141.09	1473.96	0.229174	1.62188	1.29171	0.10483	0.999945	Not Sig	nonsignificant	.	.	iron-sulfur cluster assembly 1 [Source:RGD Symbol;Acc:727792]
Cdc26	chr5	1085	821	94.1225	105.304	-11.1813	0.893819	0.000211541	0.000211541	FDR<0.05	-0.193385	negligible	168.12	177.377	158.864	0.316495	-0.527965	0.895629	0.597523	0.999945	Not Sig	nonsignificant	.	Y
Rpusd4	chr8	274	205	93.6491	118.415	-24.7658	0.790855	0.000212185	0.000212185	FDR<0.05	-0.293097	small	64.59	73.2382	55.9418	0.436057	-0.884437	0.763833	0.37646	0.999945	Not Sig	nonsignificant	.	.	RNA pseudouridine synthase D4 [Source:RGD Symbol;Acc:1311268]
Ptp4a3	chr7	389	232	106.427	124.729	-18.3022	0.853265	0.000215537	0.000215537	FDR<0.05	-0.271172	small	60.8984	52.1856	69.6111	0.434293	0.992612	1.33391	0.320899	0.999945	Not Sig	nonsignificant	.	.	protein tyrosine phosphatase 4A3 [Source:RGD Symbol;Acc:1308687]
Kdelr1	chr1	1189	786	84.4211	95.7399	-11.3188	0.881776	0.000216539	0.000216539	FDR<0.05	-0.135463	negligible	232.329	235.111	229.546	0.278565	-0.105236	0.976332	0.916189	0.999945	Not Sig	nonsignificant	.	Y	KDEL endoplasmic reticulum protein retention receptor 1 [Source:RGD Symbol;Acc:1306764]
Stat3	chr10	398	141	151.631	121.547	30.084	1.24751	0.000217838	0.000217838	FDR<0.05	0.304345	small	43.6065	32.8874	54.3257	0.557707	1.35261	1.65187	0.176179	0.999945	Not Sig	nonsignificant	.	Y	signal transducer and activator of transcription 3 [Source:RGD Symbol;Acc:3772]
Tfrc	chr11	760	215	185.192	162.066	23.1269	1.1427	0.000220016	0.000220016	FDR<0.05	0.252915	small	71.5351	36.711	106.359	0.422004	3.63057	2.8972	0.0002828	0.0530341	Not Sig	nonsignificant	.	Y	transferrin receptor [Source:RGD Symbol;Acc:70488]
Zdhhc12	chr3	484	378	75.2849	91.4379	-16.153	0.823344	0.000220991	0.000220991	FDR<0.05	-0.227303	small	100.837	106.022	95.6522	0.352645	-0.424692	0.902193	0.671062	0.999945	Not Sig	nonsignificant	.	.	zinc finger DHHC-type palmitoyltransferase 12 [Source:RGD Symbol;Acc:1306593]
Ube2w	chr5	2208	1620	100.284	110.349	-10.0654	0.908786	0.000221067	0.000221067	FDR<0.05	-0.118615	negligible	18.254	15.3709	21.1371	0.757723	0.541619	1.37513	0.588081	0.999945	Not Sig	nonsignificant	Y	Y	ubiquitin-conjugating enzyme E2W [Source:RGD Symbol;Acc:6503620]
Galnt17	chr12	292	205	84.5324	105.862	-21.3297	0.798514	0.000223305	0.000223305	FDR<0.05	-0.319994	small	17.134	16.3919	17.8762	0.768176	0.142959	1.09055	0.886322	0.999945	Not Sig	nonsignificant	.	.	polypeptide N-acetylgalactosaminyltransferase 17 [Source:RGD Symbol;Acc:1563452]
Kifap3	chr13	2111	1398	104.285	113.019	-8.73444	0.922717	0.000225445	0.000225445	FDR<0.05	-0.116166	negligible	384.48	379.078	389.881	0.248891	0.149959	1.0285	0.880797	0.999945	Not Sig	nonsignificant	Y	Y	kinesin-associated protein 3 [Source:RGD Symbol;Acc:1305191]
Dynlt2b	chr11	1659	1130	96.0251	106.552	-10.527	0.901203	0.000227602	0.000227602	FDR<0.05	-0.168288	negligible	282.188	275.701	288.676	0.265321	0.232961	1.04706	0.815792	0.999945	Not Sig	nonsignificant	.	.	dynein light chain Tctex-type 2B [Source:RGD Symbol;Acc:1563597]
Myo5b	chr18	500	359	81.5902	99.7665	-18.1763	0.817812	0.000234311	0.000234311	FDR<0.05	-0.270839	small	101.061	107.068	95.0545	0.363894	-0.448716	0.887793	0.653636	0.999945	Not Sig	nonsignificant	Y	Y	myosin Vb [Source:RGD Symbol;Acc:621347]
Camk2g	chr15	747	495	118.821	140.382	-21.5608	0.846413	0.000236825	0.000236825	FDR<0.05	-0.214735	small	93.3144	91.6719	94.9568	0.381811	0.160726	1.03583	0.872309	0.999945	Not Sig	nonsignificant	.	.	calcium/calmodulin-dependent protein kinase II gamma [Source:RGD Symbol;Acc:621802]
Hdgf	chr2	700	413	84.2734	102.218	-17.9443	0.82445	0.00023915	0.00023915	FDR<0.05	-0.28391	small	97.4919	97.5375	97.4463	0.369986	0.0176708	0.999065	0.985901	0.999945	Not Sig	nonsignificant	Y	.	heparin binding growth factor [Source:RGD Symbol;Acc:70961]
Thoc7	chr15	2446	1548	85.5638	94.229	-8.66528	0.90804	0.000239967	0.000239967	FDR<0.05	-0.122316	negligible	467.108	456.4	477.816	0.235813	0.278072	1.04692	0.780957	0.999945	Not Sig	nonsignificant	.	.	THO complex subunit 7 [Source:RGD Symbol;Acc:1305475]
Cetn3	chr2	2362	1679	79.6209	87.5232	-7.90229	0.909712	0.000241586	0.000241586	FDR<0.05	-0.100246	negligible	483.662	480.124	487.2	0.236772	0.0809612	1.01474	0.935473	0.999945	Not Sig	nonsignificant	.	.	centrin 3 [Source:RGD Symbol;Acc:620249]
Aldh3b1	chr1	2142	1327	79.9954	86.7401	-6.7447	0.922242	0.000241806	0.000241806	FDR<0.05	-0.113713	negligible	410.551	388.423	432.68	0.245602	0.641756	1.11394	0.521032	0.999945	Not Sig	nonsignificant	.	.	aldehyde dehydrogenase 3 family, member B1 [Source:RGD Symbol;Acc:1359546]
Lrtm2	chr4	307	318	108.491	130.061	-21.5693	0.83416	0.000242356	0.000242356	FDR<0.05	-0.256667	small	39.0217	48.4422	29.6013	0.549458	-1.32	0.611066	0.186836	0.999945	Not Sig	nonsignificant	.	.	leucine-rich repeats and transmembrane domains 2 [Source:RGD Symbol;Acc:1587001]
Ppid	chr2	3098	1900	125.643	116.049	9.5936	1.08267	0.000243676	0.000243676	FDR<0.05	0.113667	negligible	551.279	542.158	560.399	0.238079	0.189724	1.03365	0.849525	0.999945	Not Sig	nonsignificant	.	.	peptidylprolyl isomerase D [Source:RGD Symbol;Acc:1303174]
Isoc2b	chr1	333	199	88.8343	110.003	-21.1683	0.807566	0.000243757	0.000243757	FDR<0.05	-0.272221	small	60.5566	57.0048	64.1085	0.436098	0.351761	1.12462	0.725017	0.999945	Not Sig	nonsignificant	.	.	isochorismatase domain containing 2b [Source:RGD Symbol;Acc:1309062]
Arfgap1	chr3	357	238	110.629	138.75	-28.121	0.797326	0.000247453	0.000247453	FDR<0.05	-0.308319	small	50.5234	48.4147	52.632	0.485115	0.295794	1.08711	0.767388	0.999945	Not Sig	nonsignificant	.	.	ADP-ribosylation factor GTPase activating protein 1 [Source:RGD Symbol;Acc:708452]
Lmbrd1	chr9	2358	1484	103.825	112.525	-8.69973	0.922686	0.000249579	0.000249579	FDR<0.05	-0.105158	negligible	450.842	425.69	475.995	0.263628	0.588663	1.11817	0.556087	0.999945	Not Sig	nonsignificant	.	.	LMBR1 domain containing 1 [Source:RGD Symbol;Acc:708471]
Actr1b	chr9	3003	1816	108.358	117.397	-9.03916	0.923004	0.000253124	0.000253124	FDR<0.05	-0.108324	negligible	242.574	221.89	263.259	0.278912	0.883237	1.18644	0.377108	0.999945	Not Sig	nonsignificant	.	.	actin related protein 1B [Source:RGD Symbol;Acc:1307380]
Dtd1	chr3	4356	2886	86.2723	92.3555	-6.08327	0.934132	0.000253954	0.000253954	FDR<0.05	-0.105449	negligible	906.737	901.388	912.087	0.222627	0.067507	1.01187	0.946178	0.999945	Not Sig	nonsignificant	.	.	D-aminoacyl-tRNA deacylase 1 [Source:RGD Symbol;Acc:1311821]
Cbx3	chr4	4468	2987	101.785	108.965	-7.17934	0.934113	0.000254784	0.000254784	FDR<0.05	-0.0792038	negligible	826.628	806.651	846.606	0.227354	0.296419	1.04953	0.76691	0.999945	Not Sig	nonsignificant	.	.	chromobox 3 [Source:RGD Symbol;Acc:1549705]
Hnrnpa3	chr3	1915	1229	91.6305	104.865	-13.2349	0.873792	0.000255867	0.000255867	FDR<0.05	-0.129252	negligible	225.23	224.299	226.161	0.276603	0.0308214	1.0083	0.975412	0.999945	Not Sig	nonsignificant	.	Y	heterogeneous nuclear ribonucleoprotein A3 [Source:RGD Symbol;Acc:727807]
Hsd17b12	chr3	1441	963	105.694	114.974	-9.28039	0.919283	0.000257014	0.000257014	FDR<0.05	-0.141613	negligible	276.07	272.428	279.711	0.280518	0.110096	1.02673	0.912333	0.999945	Not Sig	nonsignificant	.	.	hydroxysteroid (17-beta) dehydrogenase 12 [Source:RGD Symbol;Acc:708367]
RGD1304624	chr6	105	61	95.2239	149.826	-54.6022	0.635563	0.000257738	0.000257738	FDR<0.05	-0.587602	medium	18.9547	20.5813	17.3282	0.703137	-0.357253	0.841939	0.720902	0.999945	Not Sig	nonsignificant	.	.	similar to RIKEN cDNA 2700097O09 [Source:RGD Symbol;Acc:1304624]
Gatd1	chr1	750	559	104.575	116.177	-11.602	0.900135	0.000259178	0.000259178	FDR<0.05	-0.179325	negligible	118.891	121.342	116.439	0.387927	-0.193646	0.959596	0.846453	0.999945	Not Sig	nonsignificant	.	.	glutamine amidotransferase class 1 domain containing 1 [Source:RGD Symbol;Acc:1304836]
Prmt1	chr1	3047	1862	96.2117	103.89	-7.67874	0.926088	0.000259735	0.000259735	FDR<0.05	-0.0940435	negligible	309.025	300.444	317.607	0.256949	0.310142	1.05713	0.756453	0.999945	Not Sig	nonsignificant	.	.	protein arginine methyltransferase 1 [Source:RGD Symbol;Acc:62020]
Nr4a3	chr5	816	80	112.482	81.6938	30.7884	1.37688	0.000261186	0.000261186	FDR<0.05	0.411239	small	35.04	7.96025	62.1198	0.767554	3.82642	7.80375	0.000130022	0.0279956	FDR<0.05	upregulated	.	.	nuclear receptor subfamily 4, group A, member 3 [Source:RGD Symbol;Acc:61882]
Dynll2	chr10	2838	1558	104.625	99.1641	5.46096	1.05507	0.000263636	0.000263636	FDR<0.05	0.144441	negligible	129.98	127.833	132.127	0.328167	0.157457	1.03359	0.874884	0.999945	Not Sig	nonsignificant	.	.	dynein light chain LC8-type 2 [Source:RGD Symbol;Acc:619860]
Anapc15	chr1	981	694	91.5495	107.641	-16.0919	0.850505	0.000264194	0.000264194	FDR<0.05	-0.169989	negligible	192.536	191.725	193.346	0.287405	0.0370041	1.00846	0.970482	0.999945	Not Sig	nonsignificant	.	.	anaphase promoting complex subunit 15 [Source:RGD Symbol;Acc:1311634]
Med20	chr9	577	493	100.119	116.839	-16.7202	0.856896	0.000264452	0.000264452	FDR<0.05	-0.214533	small	122.453	133.071	111.835	0.334992	-0.762219	0.840413	0.445929	0.999945	Not Sig	nonsignificant	.	.	mediator complex subunit 20 [Source:RGD Symbol;Acc:1306415]
Ccdc97	chr1	902	630	90.8877	104.878	-13.9906	0.866601	0.000264775	0.000264775	FDR<0.05	-0.162847	negligible	100.665	92.9296	108.4	0.352524	0.63074	1.16648	0.52821	0.999945	Not Sig	nonsignificant	.	.	coiled-coil domain containing 97 [Source:RGD Symbol;Acc:1309393]
Cacnb2	chr17	225	166	80.314	112.383	-32.0687	0.714647	0.000265617	0.000265617	FDR<0.05	-0.384604	small	31.7737	32.1031	31.4443	0.577132	-0.0981429	0.979478	0.921819	0.999945	Not Sig	nonsignificant	.	Y	calcium voltage-gated channel auxiliary subunit beta 2 [Source:RGD Symbol;Acc:67385]
Napg	chr18	2565	1600	112.41	121.88	-9.46953	0.922304	0.000267475	0.000267475	FDR<0.05	-0.117674	negligible	394.016	365.988	422.044	0.271832	0.732427	1.15316	0.463908	0.999945	Not Sig	nonsignificant	.	Y	NSF attachment protein gamma [Source:RGD Symbol;Acc:1310109]
Lnx1	chr14	435	280	92.5061	118.506	-25.9995	0.780605	0.000269169	0.000269169	FDR<0.05	-0.31139	small	84.5946	82.325	86.8642	0.374513	0.194965	1.05514	0.84542	0.999945	Not Sig	nonsignificant	.	.	ligand of numb-protein X 1 [Source:RGD Symbol;Acc:1308159]
Hif1a	chr6	265	174	84.728	111.176	-26.4478	0.762109	0.000271716	0.000271716	FDR<0.05	-0.381926	small	38.4077	39.146	37.6694	0.551359	-0.0865728	0.96228	0.931011	0.999945	Not Sig	nonsignificant	.	.	hypoxia inducible factor 1 subunit alpha [Source:RGD Symbol;Acc:61928]
Ngrn	chr1	2250	1639	110.679	122.35	-11.6714	0.904606	0.000271966	0.000271966	FDR<0.05	-0.11313	negligible	491.327	504.715	477.938	0.251239	-0.331652	0.946946	0.740152	0.999945	Not Sig	nonsignificant	.	.	neugrin, neurite outgrowth associated [Source:RGD Symbol;Acc:1583734]
Lyrm2	chr5	1099	733	82.0748	94.0943	-12.0195	0.872261	0.000274189	0.000274189	FDR<0.05	-0.178263	negligible	106.792	108.746	104.838	0.376411	-0.175881	0.96406	0.860388	0.999945	Not Sig	nonsignificant	.	.	LYR motif containing 2 [Source:RGD Symbol;Acc:1597334]
LOC100362384	chr13	273	98	93.3142	64.4931	28.8211	1.44689	0.000277157	0.000277157	FDR<0.05	0.447562	small	32.1143	21.655	42.5735	0.574803	1.66115	1.96599	0.0966832	0.999945	Not Sig	nonsignificant	.	.	ferritin light chain 1-like [Source:RGD Symbol;Acc:2318303]
LOC681367	chr9	351	242	97.6463	123.724	-26.0782	0.789224	0.00027852	0.00027852	FDR<0.05	-0.252435	small	66.5707	70.725	62.4165	0.420663	-0.425322	0.882524	0.670602	0.999945	Not Sig	nonsignificant	.	.	RIKEN cDNA 2310039H08 gene [Source:MGI Symbol;Acc:MGI:1914351]
Tasor2	chr17	337	194	77.0623	103.073	-26.0106	0.747648	0.000278845	0.000278845	FDR<0.05	-0.33065	small	5.93954	5.13211	6.74697	1.22438	0.349391	1.31466	0.726796	0.999945	Not Sig	nonsignificant	.	Y	transcription activation suppressor family member 2 [Source:RGD Symbol;Acc:1564456]
Ssr3	chr2	2012	1312	95.4664	102.72	-7.25378	0.929383	0.000279604	0.000279604	FDR<0.05	-0.14238	negligible	332.43	330.401	334.459	0.267187	0.0454235	1.01228	0.96377	0.999945	Not Sig	nonsignificant	Y	Y	signal sequence receptor subunit 3 [Source:RGD Symbol;Acc:621630]
Cetn2	chrX	3739	2402	95.9014	102.94	-7.03898	0.931621	0.000280399	0.000280399	FDR<0.05	-0.090873	negligible	708.233	682.141	734.326	0.224915	0.465464	1.0765	0.641599	0.999945	Not Sig	nonsignificant	.	.	centrin 2 [Source:RGD Symbol;Acc:620247]
Gnal	chr18	639	390	80.9608	97.3831	-16.4223	0.831364	0.000283526	0.000283526	FDR<0.05	-0.151042	negligible	61.4121	67.5291	55.2952	0.449636	-0.597148	0.818835	0.550408	0.999945	Not Sig	nonsignificant	.	Y	G protein subunit alpha L [Source:RGD Symbol;Acc:2715]
Maip1	chr9	815	557	86.6806	101.455	-14.774	0.854378	0.000287228	0.000287228	FDR<0.05	-0.199476	negligible	153.416	148.467	158.365	0.322507	0.280738	1.06667	0.778911	0.999945	Not Sig	nonsignificant	.	Y	matrix AAA peptidase interacting protein 1 [Source:RGD Symbol;Acc:1303159]
Tug1	chr14	352	255	89.8947	114.834	-24.9391	0.782825	0.000288139	0.000288139	FDR<0.05	-0.233361	small	16.8055	20.2663	13.3447	0.788781	-0.713556	0.658468	0.475502	0.999945	Not Sig	nonsignificant	.	.	taurine upregulated gene 1 [Source:RGD Symbol;Acc:150344606]
Prps2	chrX	153	77	80.4987	114.566	-34.0676	0.702638	0.00028834	0.00028834	FDR<0.05	-0.463437	small	13.9968	7.27963	20.7139	0.879022	1.62602	2.84546	0.103945	0.999945	Not Sig	nonsignificant	.	Y	phosphoribosyl pyrophosphate synthetase 2 [Source:RGD Symbol;Acc:3415]
Sox15	chr10	89	59	84.3469	126.41	-42.0636	0.667246	0.000289172	0.000289172	FDR<0.05	-0.62522	medium	19.2935	20.1881	18.3989	0.714087	-0.154471	0.91137	0.877238	0.999945	Not Sig	nonsignificant	.	Y	SRY-box transcription factor 15 [Source:RGD Symbol;Acc:1312022]
Rabggtb	chr2	2936	2169	107.11	116.39	-9.28001	0.920268	0.000293132	0.000293132	FDR<0.05	-0.0919681	negligible	601.306	629.194	573.418	0.227664	-0.59432	0.911352	0.552298	0.999945	Not Sig	nonsignificant	.	Y	Rab geranylgeranyltransferase subunit beta [Source:RGD Symbol;Acc:3530]
Nsmf	chr3	3043	1870	100.324	107.287	-6.96329	0.935097	0.000294366	0.000294366	FDR<0.05	-0.0938617	negligible	376.275	380.04	372.509	0.309897	-0.0736093	0.980184	0.941321	0.999945	Not Sig	nonsignificant	.	Y	NMDA receptor synaptonuclear signaling and neuronal migration factor [Source:RGD Symbol;Acc:619819]
Tmem205	chr8	1448	848	79.2581	91.0188	-11.7607	0.870788	0.000295343	0.000295343	FDR<0.05	-0.202393	small	248.154	233.722	262.587	0.294013	0.600048	1.1235	0.548474	0.999945	Not Sig	nonsignificant	.	.	transmembrane protein 205 [Source:RGD Symbol;Acc:1563250]
Timm22	chr10	820	630	95.0486	108.524	-13.4753	0.875831	0.000299277	0.000299277	FDR<0.05	-0.233337	small	64.3558	70.7524	57.9592	0.439158	-0.698853	0.819184	0.484644	0.999945	Not Sig	nonsignificant	.	.	translocase of inner mitochondrial membrane 22 [Source:RGD Symbol;Acc:68406]
Swi5	chr3	7722	5264	106.161	111.642	-5.48097	0.950906	0.00030088	0.00030088	FDR<0.05	-0.0628834	negligible	1531.49	1498.61	1564.37	0.212644	0.286246	1.04388	0.774689	0.999945	Not Sig	nonsignificant	.	.	SWI5 homologous recombination repair protein [Source:RGD Symbol;Acc:1559966]
Dnajc11	chr5	917	721	100.203	113.527	-13.3239	0.882637	0.000302264	0.000302264	FDR<0.05	-0.174718	negligible	195.121	199.634	190.607	0.300409	-0.249759	0.954783	0.802774	0.999945	Not Sig	nonsignificant	Y	.	DnaJ heat shock protein family (Hsp40) member C11 [Source:RGD Symbol;Acc:1307731]
Slirp	chr6	2907	1911	78.6982	84.8002	-6.102	0.928043	0.00030283	0.00030283	FDR<0.05	-0.0968757	negligible	20.8312	21.4712	20.1912	0.68038	-0.0986105	0.940387	0.921448	0.999945	Not Sig	nonsignificant	.	.	SRA stem-loop interacting RNA binding protein [Source:RGD Symbol;Acc:1585290]
Tmub2	chr10	1844	1230	118.563	130.712	-12.1489	0.907056	0.000303678	0.000303678	FDR<0.05	-0.122576	negligible	359.483	358.34	360.625	0.259178	0.0165652	1.00638	0.986783	0.999945	Not Sig	nonsignificant	.	.	transmembrane and ubiquitin-like domain containing 2 [Source:RGD Symbol;Acc:1304758]
Kirrel3	chr8	475	320	81.7613	101.073	-19.3118	0.808933	0.000306088	0.000306088	FDR<0.05	-0.188974	negligible	107.999	109.241	106.757	0.360397	-0.053423	0.97726	0.957395	0.999945	Not Sig	nonsignificant	.	.	kirre like nephrin family adhesion molecule 3 [Source:RGD Symbol;Acc:1311382]
Celsr2	chr2	1128	735	114.444	127.081	-12.6363	0.900564	0.000306236	0.000306236	FDR<0.05	-0.143275	negligible	164.609	171.247	157.97	0.311002	-0.354975	0.922469	0.722608	0.999945	Not Sig	nonsignificant	.	.	cadherin, EGF LAG seven-pass G-type receptor 2 [Source:RGD Symbol;Acc:69237]
Igfbp2	chr9	124	83	90.3713	62.8428	27.5285	1.43805	0.000306568	0.000306568	FDR<0.05	0.371002	small	21.2796	25.5295	17.0297	0.727243	-0.758501	0.667061	0.448151	0.999945	Not Sig	nonsignificant	.	.	insulin-like growth factor binding protein 2 [Source:RGD Symbol;Acc:2873]
Psmd4	chr2	3103	2169	78.9043	85.147	-6.24265	0.926684	0.00030658	0.00030658	FDR<0.05	-0.10116	negligible	631.165	634.563	627.766	0.229099	-0.0768331	0.989289	0.938756	0.999945	Not Sig	nonsignificant	.	.	proteasome 26S subunit ubiquitin receptor, non-ATPase 4 [Source:RGD Symbol;Acc:621109]
Orai2	chr12	480	349	110.293	127.512	-17.2194	0.864959	0.000306895	0.000306895	FDR<0.05	-0.21377	small	41.0301	47.1063	34.9539	0.543787	-0.801999	0.742022	0.422554	0.999945	Not Sig	nonsignificant	.	Y	ORAI calcium release-activated calcium modulator 2 [Source:RGD Symbol;Acc:1310213]
Ywhaz	chr7	32876	20124	108.996	108.656	0.339691	1.00313	0.000308414	0.000308414	FDR<0.05	0.0374716	negligible	5895.24	5609.33	6181.15	0.206645	0.675641	1.10194	0.499269	0.999945	Not Sig	nonsignificant	.	.	tyrosine 3-monooxygenase/tryptophan 5-monooxygenase activation protein, zeta [Source:RGD Symbol;Acc:3980]
Cep43	chr1	248	129	124.305	156.679	-32.374	0.793374	0.000309022	0.000309022	FDR<0.05	-0.375248	small	40.253	37.2606	43.2454	0.505052	0.443471	1.16062	0.657425	0.999945	Not Sig	nonsignificant	.	Y	centrosomal protein 43 [Source:RGD Symbol;Acc:1583370]
Rbm18	chr3	1337	905	97.0804	112.797	-15.717	0.860662	0.000311627	0.000311627	FDR<0.05	-0.131815	negligible	263.563	267.009	260.116	0.306302	-0.150183	0.974186	0.88062	0.999945	Not Sig	nonsignificant	.	.	RNA binding motif protein 18 [Source:RGD Symbol;Acc:1307411]
Aamdc	chr1	499	316	80.2039	96.5509	-16.347	0.830691	0.000316342	0.000316342	FDR<0.05	-0.21763	small	41.759	41.2936	42.2244	0.497793	0.0446363	1.02254	0.964397	0.999945	Not Sig	nonsignificant	.	Y	adipogenesis associated, Mth938 domain containing [Source:RGD Symbol;Acc:1561459]
Celf4	chr18	2078	1150	87.9173	100.153	-12.2355	0.877832	0.000318473	0.000318473	FDR<0.05	-0.122819	negligible	239.562	216.912	262.212	0.289527	0.975747	1.20884	0.32919	0.999945	Not Sig	nonsignificant	Y	Y	CUGBP, Elav-like family member 4 [Source:RGD Symbol;Acc:1307630]
Jmjd8	chr10	1365	837	97.8435	111.09	-13.2462	0.880761	0.000320137	0.000320137	FDR<0.05	-0.171557	negligible	226.215	210.237	242.194	0.274907	0.748376	1.15201	0.454233	0.999945	Not Sig	nonsignificant	.	.	jumonji domain containing 8 [Source:RGD Symbol;Acc:1307381]
Gabrb3	chr1	998	588	95.8514	109.962	-14.1101	0.871681	0.00032099	0.00032099	FDR<0.05	-0.159895	negligible	47.9674	46.2164	49.7184	0.471403	0.198297	1.07577	0.842813	0.999945	Not Sig	nonsignificant	.	.	gamma-aminobutyric acid type A receptor subunit beta 3 [Source:RGD Symbol;Acc:2651]
Atcay	chr7	1519	917	90.8375	102.106	-11.2689	0.889636	0.00032343	0.00032343	FDR<0.05	-0.173183	negligible	251.606	231.813	271.399	0.271207	0.838	1.17076	0.402031	0.999945	Not Sig	nonsignificant	.	.	ATCAY kinesin light chain interacting caytaxin [Source:RGD Symbol;Acc:1309312]
Tmem41a	chr11	228	161	80.4557	107.199	-26.7436	0.750524	0.000330161	0.000330161	FDR<0.05	-0.302399	small	45.4684	52.9444	37.9923	0.503933	-0.905071	0.717588	0.365428	0.999945	Not Sig	nonsignificant	.	.	transmembrane protein 41a [Source:RGD Symbol;Acc:1591692]
Atp2b1	chr7	2489	1473	56.5042	65.0984	-8.59427	0.86798	0.000331881	0.000331881	FDR<0.05	-0.106779	negligible	133.33	129.928	136.733	0.323052	0.241291	1.05237	0.80933	0.999945	Not Sig	nonsignificant	Y	Y	ATPase plasma membrane Ca2+ transporting 1 [Source:RGD Symbol;Acc:621303]
Trappc2	chrX	3333	2335	139.449	148.767	-9.31858	0.937361	0.000332024	0.000332024	FDR<0.05	-0.0952198	negligible	680.441	671.204	689.678	0.282476	0.121056	1.02752	0.903647	0.999945	Not Sig	nonsignificant	.	.	trafficking protein particle complex subunit 2 [Source:RGD Symbol;Acc:1306925]
Amigo1	chr2	223	169	87.2878	113.697	-26.4092	0.767723	0.000333265	0.000333265	FDR<0.05	-0.354049	small	9.47005	12.0186	6.9215	1.01915	-0.753208	0.575899	0.451325	0.999945	Not Sig	nonsignificant	Y	.	adhesion molecule with Ig like domain 1 [Source:RGD Symbol;Acc:1303079]
Gmpr	chr17	1317	807	92.4134	104.048	-11.6346	0.888181	0.00033379	0.00033379	FDR<0.05	-0.145135	negligible	251.612	237.127	266.097	0.283523	0.604798	1.12217	0.545313	0.999945	Not Sig	nonsignificant	.	.	guanosine monophosphate reductase [Source:RGD Symbol;Acc:70980]
Zfp161	chr9	66	80	91.5399	125.899	-34.3589	0.727091	0.000338109	0.000338109	FDR<0.05	-0.579012	medium	8.12617	10.5263	5.72603	1.07911	-0.829672	0.543973	0.406724	0.999945	Not Sig	nonsignificant	.	Y	zinc finger protein 161 [Source:RGD Symbol;Acc:628712]
Kcne2	chr11	82	17	105.691	205.015	-99.324	0.515529	0.000341681	0.000341681	FDR<0.05	-1.27441	large	8.87914	6.20587	11.5524	1.06783	0.820244	1.86153	0.412077	0.999945	Not Sig	nonsignificant	.	.	potassium voltage-gated channel subfamily E regulatory subunit 2 [Source:RGD Symbol;Acc:621383]
Vhl	chr4	839	358	124.436	108.721	15.7148	1.14454	0.000343514	0.000343514	FDR<0.05	0.219071	small	105.939	82.6654	129.213	0.348421	1.83984	1.56309	0.065791	0.999945	Not Sig	nonsignificant	Y	Y	von Hippel-Lindau tumor suppressor [Source:RGD Symbol;Acc:3960]
Nedd4	chr8	2114	1270	89.2374	101.434	-12.1967	0.879758	0.000345529	0.000345529	FDR<0.05	-0.126401	negligible	295.612	265.777	325.447	0.265444	1.08078	1.22451	0.279795	0.999945	Not Sig	nonsignificant	Y	Y	NEDD4 E3 ubiquitin protein ligase [Source:RGD Symbol;Acc:3157]
Mapk8ip2	chr7	2074	1507	97.0095	107.816	-10.8065	0.899769	0.00034578	0.00034578	FDR<0.05	-0.113835	negligible	113.668	111.966	115.37	0.337392	0.130021	1.03041	0.89655	0.999945	Not Sig	nonsignificant	Y	.	mitogen-activated protein kinase 8 interacting protein 2 [Source:RGD Symbol;Acc:1309727]
LOC120095704	chr11	139	125	75.3259	101.241	-25.9147	0.744029	0.000346783	0.000346783	FDR<0.05	-0.443547	small	5.30472	5.13211	5.47734	1.29115	0.0994317	1.06727	0.920796	0.999945	Not Sig	nonsignificant	.	.
Rtl6	chr7	238	216	80.8973	104.007	-23.1094	0.777809	0.000347918	0.000347918	FDR<0.05	-0.280994	small	10.0002	12.8303	7.17019	0.958401	-0.852546	0.558849	0.393911	0.999945	Not Sig	nonsignificant	.	.	retrotransposon Gag like 6 [Source:RGD Symbol;Acc:1306472]
Psma5	chr2	4653	3091	99.9689	107.364	-7.39473	0.931124	0.000350621	0.000350621	FDR<0.05	-0.0794929	negligible	933.664	924.715	942.613	0.21787	0.124264	1.01935	0.901106	0.999945	Not Sig	nonsignificant	.	.	proteasome 20S subunit alpha 5 [Source:RGD Symbol;Acc:61848]
Eml6	chr14	418	271	101.11	122.444	-21.3342	0.825765	0.000351162	0.000351162	FDR<0.05	-0.26253	small	4.78596	4.7918	4.78012	1.33769	-0.00212085	0.997564	0.998308	0.999945	Not Sig	nonsignificant	.	Y	EMAP like 6 [Source:RGD Symbol;Acc:1561672]
Sf3b5	chr1	3745	2532	93.0898	98.6931	-5.60336	0.943224	0.000352679	0.000352679	FDR<0.05	-0.10307	negligible	759.39	785.8	732.98	0.222772	-0.443468	0.932783	0.657427	0.999945	Not Sig	nonsignificant	.	.	splicing factor 3b, subunit 5 [Source:RGD Symbol;Acc:1586993]
Psmd14	chr3	2641	1837	79.0571	86.1842	-7.12709	0.917304	0.000353311	0.000353311	FDR<0.05	-0.0913161	negligible	525.109	525.373	524.844	0.235632	-0.0172655	0.998994	0.986225	0.999945	Not Sig	nonsignificant	.	Y	proteasome 26S subunit, non-ATPase 14 [Source:RGD Symbol;Acc:1594532]
RGD735065	chr20	1570	1121	78.0499	87.2086	-9.15872	0.894979	0.000355645	0.000355645	FDR<0.05	-0.122845	negligible	307.638	312.908	302.369	0.25659	-0.201856	0.966317	0.840029	0.999945	Not Sig	nonsignificant	.	Y	similar to GI:13385412-like protein splice form I [Source:RGD Symbol;Acc:735065]
Cttn	chr1	1315	826	113.366	126.916	-13.5504	0.893233	0.000358517	0.000358517	FDR<0.05	-0.156736	negligible	234.382	231.526	237.238	0.277466	0.115089	1.02467	0.908375	0.999945	Not Sig	nonsignificant	.	.	cortactin [Source:RGD Symbol;Acc:619839]
Cntnap2	chr4	393	261	109.761	126.556	-16.7953	0.86729	0.000360226	0.000360226	FDR<0.05	-0.296223	small	51.1227	50.4861	51.7594	0.555502	0.000897669	1.02522	0.999284	0.999945	Not Sig	nonsignificant	Y	Y	contactin associated protein 2 [Source:RGD Symbol;Acc:1307076]
Wdr7	chr18	679	481	92.7542	105.272	-12.5174	0.881094	0.000362245	0.000362245	FDR<0.05	-0.161187	negligible	83.9713	79.7844	88.1583	0.380683	0.392896	1.10496	0.694397	0.999945	Not Sig	nonsignificant	Y	Y	WD repeat domain 7 [Source:RGD Symbol;Acc:619836]
Slc36a1	chr10	129	106	98.828	145.562	-46.7343	0.67894	0.000364359	0.000364359	FDR<0.05	-0.470792	small	8.32715	10.6045	6.04976	1.06354	-0.73514	0.570489	0.462254	0.999945	Not Sig	nonsignificant	.	Y	solute carrier family 36 member 1 [Source:RGD Symbol;Acc:619801]
Senp3	chr10	282	215	92.4226	121.337	-28.9143	0.761702	0.000365903	0.000365903	FDR<0.05	-0.296585	small	54.7174	57.9983	51.4365	0.456312	-0.341092	0.886862	0.733034	0.999945	Not Sig	nonsignificant	.	.	SUMO specific peptidase 3 [Source:RGD Symbol;Acc:1312040]
Pnma8b	chr1	1402	911	83.3017	93.8145	-10.5128	0.887941	0.000366563	0.000366563	FDR<0.05	-0.104508	negligible	113.379	122.017	104.74	0.44291	-0.448771	0.858411	0.653597	0.999945	Not Sig	nonsignificant	.	.	PNMA family member 8B [Source:RGD Symbol;Acc:1560435]
Mrpl38	chr10	663	334	93.9202	111.534	-17.6133	0.84208	0.000368508	0.000368508	FDR<0.05	-0.233093	small	106.758	97.248	116.268	0.385904	0.722964	1.19558	0.469702	0.999945	Not Sig	nonsignificant	.	.	mitochondrial ribosomal protein L38 [Source:RGD Symbol;Acc:1311180]
Cert1	chr2	348	208	132.525	109.89	22.6356	1.20598	0.000369186	0.000369186	FDR<0.05	0.307564	small	10.3089	13.2234	7.39445	0.950728	-0.887461	0.559194	0.374831	0.999945	Not Sig	nonsignificant	.	Y	ceramide transporter 1 [Source:RGD Symbol;Acc:1309131]
G4	chr20	360	286	72.875	91.8923	-19.0173	0.793048	0.000371191	0.000371191	FDR<0.05	-0.31546	small	70.0957	77.4276	62.7638	0.41091	-0.720575	0.810613	0.471171	0.999945	Not Sig	nonsignificant	.	.	G4 protein [Source:RGD Symbol;Acc:1303038]
Mrpl44	chr9	994	749	86.2122	94.3454	-8.13313	0.913794	0.00037154	0.00037154	FDR<0.05	-0.162302	negligible	173.061	184.944	161.179	0.3167	-0.647737	0.871501	0.517155	0.999945	Not Sig	nonsignificant	.	.	mitochondrial ribosomal protein L44 [Source:RGD Symbol;Acc:1309556]
LOC100365062	chr1	944	657	70.5278	84.2718	-13.744	0.836908	0.000373507	0.000373507	FDR<0.05	-0.173992	negligible	230.638	237.184	224.092	0.311828	-0.292941	0.9448	0.769567	0.999945	Not Sig	nonsignificant	.	.	eukaryotic translation initiation factor 3, subunit 6 48kDa-like [Source:RGD Symbol;Acc:2319808]
Dera	chr4	380	275	74.7128	93.9487	-19.236	0.79525	0.000374498	0.000374498	FDR<0.05	-0.244281	small	81.3293	80.1521	82.5065	0.395609	0.0758026	1.02937	0.939576	0.999945	Not Sig	nonsignificant	.	Y	deoxyribose-phosphate aldolase [Source:RGD Symbol;Acc:1589836]
Tm9sf2	chr15	726	432	96.0059	112.95	-16.9438	0.849988	0.000376721	0.000376721	FDR<0.05	-0.196432	negligible	126.004	125.58	126.428	0.406726	0.0530521	1.00675	0.95769	0.999945	Not Sig	nonsignificant	.	.	transmembrane 9 superfamily member 2 [Source:RGD Symbol;Acc:1359230]
Rnf123	chr8	272	164	105.277	139.282	-34.005	0.755856	0.000377361	0.000377361	FDR<0.05	-0.368656	small	44.4369	44.906	43.9679	0.512744	-0.0110224	0.979111	0.991206	0.999945	Not Sig	nonsignificant	.	.	ring finger protein 123 [Source:RGD Symbol;Acc:2301394]
Dtymk	chr9	1156	704	108.561	95.0576	13.5031	1.14205	0.000379659	0.000379659	FDR<0.05	0.170322	negligible	213.962	203.953	223.972	0.295435	0.463479	1.09816	0.643021	0.999945	Not Sig	nonsignificant	.	.	deoxythymidylate kinase [Source:RGD Symbol;Acc:1309614]
Coa4	chr1	516	435	71.1671	85.0281	-13.861	0.836984	0.000379781	0.000379781	FDR<0.05	-0.218682	small	112.051	126.185	97.9175	0.346309	-1.07247	0.775986	0.283509	0.999945	Not Sig	nonsignificant	.	.	cytochrome c oxidase assembly factor 4 homolog [Source:RGD Symbol;Acc:1562228]
Rnf167	chr10	2091	1484	92.2429	102.313	-10.0703	0.901573	0.00037979	0.00037979	FDR<0.05	-0.112147	negligible	417.059	423.8	410.318	0.24558	-0.195603	0.968188	0.844921	0.999945	Not Sig	nonsignificant	.	.	ring finger protein 167 [Source:RGD Symbol;Acc:1305972]
Prkcz	chr5	2282	1528	95.0126	102.717	-7.70425	0.924995	0.00038181	0.00038181	FDR<0.05	-0.111775	negligible	377.554	353.574	401.533	0.250025	0.720913	1.13564	0.470963	0.999945	Not Sig	nonsignificant	.	Y	protein kinase C, zeta [Source:RGD Symbol;Acc:3399]
Bak1	chr20	167	112	89.1244	127.128	-38.0035	0.701061	0.000386707	0.000386707	FDR<0.05	-0.347587	small	21.2906	21.9171	20.6641	0.686658	-0.168808	0.942831	0.865947	0.999945	Not Sig	nonsignificant	.	.	BCL2-antagonist/killer 1 [Source:RGD Symbol;Acc:621635]
Fgf13	chrX	1266	843	100.56	112.494	-11.9339	0.893915	0.000388123	0.000388123	FDR<0.05	-0.168534	negligible	218.478	213.982	222.974	0.277805	0.204333	1.04202	0.838093	0.999945	Not Sig	nonsignificant	.	Y	fibroblast growth factor 13 [Source:RGD Symbol;Acc:620164]
Cep85	chr5	113	93	115.631	169.044	-53.4128	0.68403	0.000392028	0.000392028	FDR<0.05	-0.463157	small	23.3503	18.6176	28.083	0.660361	0.858003	1.50841	0.390891	0.999945	Not Sig	nonsignificant	.	Y	centrosomal protein 85 [Source:RGD Symbol;Acc:1311520]
Cryga	chr9	1214	772	91.6548	106.705	-15.0498	0.858958	0.000392591	0.000392591	FDR<0.05	-0.155598	negligible	238.082	225.058	251.106	0.275109	0.566667	1.11574	0.57094	0.999945	Not Sig	nonsignificant	.	.	crystallin, gamma A [Source:RGD Symbol;Acc:1595217]
Synj2bp	chr6	595	387	87.5873	105.708	-18.1212	0.828574	0.000396073	0.000396073	FDR<0.05	-0.24331	small	9.12894	11.8093	6.44854	1.08179	-0.796374	0.546055	0.425815	0.999945	Not Sig	nonsignificant	Y	.	synaptojanin 2 binding protein [Source:RGD Symbol;Acc:69400]
Gemin7	chr1	808	696	90.9598	104.196	-13.2362	0.872968	0.000397393	0.000397393	FDR<0.05	-0.155597	negligible	153.089	163.969	142.208	0.315016	-0.669229	0.867285	0.503349	0.999945	Not Sig	nonsignificant	.	.	gem (nuclear organelle) associated protein 7 [Source:RGD Symbol;Acc:1597035]
RGD1306063	chr15	2368	1484	81.0646	88.1301	-7.06554	0.919828	0.000399453	0.000399453	FDR<0.05	-0.129965	negligible	211.961	205.054	218.868	0.300341	0.301339	1.06737	0.763156	0.999945	Not Sig	nonsignificant	Y	Y	similar to HT021 [Source:RGD Symbol;Acc:1306063]
Etfa	chr8	1820	1192	98.5329	108.08	-9.54728	0.911665	0.000400538	0.000400538	FDR<0.05	-0.162218	negligible	363.203	348.702	377.705	0.24832	0.461321	1.08317	0.644569	0.999945	Not Sig	nonsignificant	.	.	electron transfer flavoprotein subunit alpha [Source:RGD Symbol;Acc:628747]
Asns	chr4	1661	1111	94.1208	103.736	-9.61515	0.907311	0.00040105	0.00040105	FDR<0.05	-0.114352	negligible	366.795	354.466	379.125	0.26169	0.34777	1.06957	0.728013	0.999945	Not Sig	nonsignificant	.	.	asparagine synthetase (glutamine-hydrolyzing) [Source:RGD Symbol;Acc:2162]
Ndufa10l1	chr6	32	15	99.4986	181.552	-82.0535	0.548044	0.000403656	0.000403656	FDR<0.05	-1.07978	large	9.54785	8.0913	11.0044	0.994453	0.403605	1.36003	0.686503	0.999945	Not Sig	nonsignificant	.	.	NADH dehydrogenase (ubiquinone) 1 alpha subcomplex 10-like 1 [Source:RGD Symbol;Acc:1589745]
Pigp	chr11	1046	642	69.4495	80.2039	-10.7544	0.865912	0.000404318	0.000404318	FDR<0.05	-0.21936	small	175.744	165.462	186.027	0.295693	0.55963	1.12429	0.575732	0.999945	Not Sig	nonsignificant	.	.	phosphatidylinositol glycan anchor biosynthesis, class P [Source:RGD Symbol;Acc:1307205]
Triap1	chr12	1140	794	86.5472	101.636	-15.0884	0.851545	0.000407681	0.000407681	FDR<0.05	-0.152828	negligible	238.101	243.046	233.155	0.275289	-0.211699	0.959307	0.832342	0.999945	Not Sig	nonsignificant	.	.	TP53 regulated inhibitor of apoptosis 1 [Source:RGD Symbol;Acc:1586233]
Ipo13	chr5	447	273	84.9114	107.413	-22.5021	0.79051	0.000409955	0.000409955	FDR<0.05	-0.259893	small	75.6877	75.4893	75.886	0.431082	0.0607375	1.00525	0.951568	0.999945	Not Sig	nonsignificant	.	.	importin 13 [Source:RGD Symbol;Acc:620071]
Camta2	chr10	1615	1080	98.394	113.287	-14.8931	0.868537	0.000410126	0.000410126	FDR<0.05	-0.127938	negligible	297.766	301.778	293.755	0.259296	-0.13812	0.973416	0.890145	0.999945	Not Sig	nonsignificant	.	.	calmodulin binding transcription activator 2 [Source:RGD Symbol;Acc:1311296]
Dnajb13	chr1	1067	597	95.9808	108.703	-12.7225	0.882961	0.000422114	0.000422114	FDR<0.05	-0.145042	negligible	187.755	165.855	209.655	0.296894	1.12317	1.26409	0.261363	0.999945	Not Sig	nonsignificant	.	.	DnaJ heat shock protein family (Hsp40) member B13 [Source:RGD Symbol;Acc:1359131]
Ghsr	chr2	240	62	126.925	85.9693	40.9555	1.4764	0.000423839	0.000423839	FDR<0.05	0.488494	small	12.3165	8.30057	16.3325	0.898825	1.08781	1.96764	0.276679	0.999945	Not Sig	nonsignificant	.	.	growth hormone secretagogue receptor [Source:RGD Symbol;Acc:621397]
Pet100	chr12	3414	2193	87.1929	93.652	-6.45908	0.931031	0.000424021	0.000424021	FDR<0.05	-0.0970077	negligible	105.86	107.252	104.467	0.360295	-0.088372	0.974035	0.929581	0.999945	Not Sig	nonsignificant	.	.	PET100 cytochrome c oxidase chaperone [Source:RGD Symbol;Acc:1585222]
Znhit3	chr10	1383	926	107.992	122.061	-14.069	0.884738	0.000427589	0.000427589	FDR<0.05	-0.120784	negligible	271.915	268.525	275.306	0.263515	0.132306	1.02525	0.894743	0.999945	Not Sig	nonsignificant	Y	.	zinc finger, HIT-type containing 3 [Source:RGD Symbol;Acc:1598226]
Prpsap1	chr10	228	140	106.808	133.762	-26.9537	0.798495	0.000432013	0.000432013	FDR<0.05	-0.376548	small	37.546	39.0404	36.0516	0.64522	-0.133257	0.923444	0.89399	0.999945	Not Sig	nonsignificant	.	.	phosphoribosyl pyrophosphate synthetase-associated protein 1 [Source:RGD Symbol;Acc:620206]
C1qbp	chr10	456	315	89.9913	110.111	-20.1194	0.81728	0.000432163	0.000432163	FDR<0.05	-0.302306	small	82.9128	96.9605	68.865	0.417669	-1.14288	0.710238	0.253089	0.999945	Not Sig	nonsignificant	.	Y	complement C1q binding protein [Source:RGD Symbol;Acc:2230]
Smim11a	chr11	1536	1027	76.2901	85.7322	-9.44207	0.889866	0.000439075	0.000439075	FDR<0.05	-0.142647	negligible	300.171	309.45	290.891	0.257037	-0.342521	0.940026	0.731959	0.999945	Not Sig	nonsignificant	.	.
Ciao1	chr3	1313	1059	94.7765	104.657	-9.88018	0.905594	0.000439422	0.000439422	FDR<0.05	-0.156554	negligible	279.131	306.335	251.927	0.267677	-1.05491	0.822391	0.291467	0.999945	Not Sig	nonsignificant	.	.	cytosolic iron-sulfur assembly component 1 [Source:RGD Symbol;Acc:1307285]
Cyb5a	chr18	3649	2494	97.752	104.82	-7.06825	0.932568	0.000442035	0.000442035	FDR<0.05	-0.0956627	negligible	719.688	715.233	724.142	0.222269	0.0855422	1.01246	0.93183	0.999945	Not Sig	nonsignificant	.	.	cytochrome b5 type A [Source:RGD Symbol;Acc:620558]
Dnph1	chr9	883	623	87.6552	97.7354	-10.0802	0.896862	0.0004441	0.0004441	FDR<0.05	-0.196898	negligible	117.793	122.308	113.279	0.338677	-0.313894	0.926176	0.753601	0.999945	Not Sig	nonsignificant	.	.	2'-deoxynucleoside 5'-phosphate N-hydrolase 1 [Source:RGD Symbol;Acc:620382]
Tepsin	chr10	231	172	107.12	137.738	-30.6182	0.777708	0.00044442	0.00044442	FDR<0.05	-0.370204	small	43.0593	46.0854	40.0333	0.495861	-0.428769	0.868678	0.668092	0.999945	Not Sig	nonsignificant	.	.	TEPSIN, adaptor related protein complex 4 accessory protein [Source:RGD Symbol;Acc:1307410]
Ntpcr	chr19	1956	1375	81.7603	89.4157	-7.65544	0.914384	0.000448589	0.000448589	FDR<0.05	-0.123798	negligible	384.937	389.579	380.295	0.252999	-0.155252	0.976168	0.876623	0.999945	Not Sig	nonsignificant	.	.	nucleoside-triphosphatase, cancer-related [Source:RGD Symbol;Acc:1306192]
Tppp	chr1	1521	1055	100.379	109.555	-9.17559	0.916246	0.000449039	0.000449039	FDR<0.05	-0.125235	negligible	145.375	139.854	150.897	0.333865	0.295947	1.07896	0.767271	0.999945	Not Sig	nonsignificant	.	.	tubulin polymerization promoting protein [Source:RGD Symbol;Acc:1310121]
Rbmx	chrX	963	562	116.672	138.873	-22.2005	0.840138	0.000455723	0.000455723	FDR<0.05	-0.182831	negligible	184.23	171.329	197.13	0.324319	0.583118	1.15059	0.559814	0.999945	Not Sig	nonsignificant	.	Y	RNA binding motif protein, X-linked [Source:RGD Symbol;Acc:1565256]
Mgat3	chr7	332	304	84.1394	106.805	-22.6658	0.787784	0.000460843	0.000460843	FDR<0.05	-0.264041	small	13.7013	14.5064	12.8962	0.826648	-0.223028	0.888999	0.823514	0.999945	Not Sig	nonsignificant	.	Y	beta-1,4-mannosyl-glycoprotein 4-beta-N-acetylglucosaminyltransferase [Source:RGD Symbol;Acc:3084]
Pitpnb	chr12	1237	783	79.5798	91.1901	-11.6103	0.87268	0.000462553	0.000462553	FDR<0.05	-0.128633	negligible	218.375	208.25	228.5	0.298506	0.415043	1.09724	0.67811	0.999945	Not Sig	nonsignificant	Y	Y	phosphatidylinositol transfer protein, beta [Source:RGD Symbol;Acc:620143]
Gzmm	chr7	705	467	82.5908	95.327	-12.7362	0.866395	0.000469908	0.000469908	FDR<0.05	-0.201467	small	133.49	124.299	142.681	0.328493	0.591872	1.14789	0.553936	0.999945	Not Sig	nonsignificant	.	.	granzyme M [Source:RGD Symbol;Acc:620022]
LOC100360449	chr3	2654	1759	80.3122	88.7002	-8.38799	0.905434	0.000473541	0.000473541	FDR<0.05	-0.100045	negligible	449.697	443.363	456.031	0.244734	0.150737	1.02857	0.880183	0.999945	Not Sig	nonsignificant	.	.
Snrpa1	chr1	1059	701	101.902	119.132	-17.2304	0.855367	0.000475367	0.000475367	FDR<0.05	-0.144687	negligible	190.983	180.727	201.24	0.289375	0.53516	1.1135	0.592539	0.999945	Not Sig	nonsignificant	.	.	small nuclear ribonucleoprotein polypeptide A' [Source:RGD Symbol;Acc:2320494]
Tmem18	chr6	363	266	114.024	140.571	-26.5474	0.811146	0.000475562	0.000475562	FDR<0.05	-0.292116	small	68.0227	65.4892	70.5561	0.444074	0.191006	1.07737	0.848521	0.999945	Not Sig	nonsignificant	.	.	transmembrane protein 18 [Source:RGD Symbol;Acc:1359389]
Blmh	chr10	1291	808	92.3253	103.263	-10.9375	0.894081	0.000477213	0.000477213	FDR<0.05	-0.149953	negligible	252.079	252.579	251.58	0.268838	-0.0319423	0.996045	0.974518	0.999945	Not Sig	nonsignificant	.	.	bleomycin hydrolase [Source:RGD Symbol;Acc:1304668]
Mtus2	chr12	84	54	85.0684	145.619	-60.5503	0.584186	0.000478738	0.000478738	FDR<0.05	-0.561835	medium	8.41441	10.6045	6.22429	1.06287	-0.685483	0.586946	0.493039	0.999945	Not Sig	nonsignificant	.	Y	microtubule associated scaffold protein 2 [Source:RGD Symbol;Acc:1562533]
Dld	chr6	2652	1919	102.499	112.846	-10.3468	0.90831	0.000479291	0.000479291	FDR<0.05	-0.0991384	negligible	556.318	561.403	551.234	0.235683	-0.123123	0.981885	0.90201	0.999945	Not Sig	nonsignificant	.	.	dihydrolipoamide dehydrogenase [Source:RGD Symbol;Acc:735073]
Lrp11	chr1	752	513	111.897	131.737	-19.8402	0.849395	0.000480623	0.000480623	FDR<0.05	-0.207678	small	86.9617	86.4362	87.4873	0.377963	0.0331198	1.01216	0.973579	0.999945	Not Sig	nonsignificant	.	Y	LDL receptor related protein 11 [Source:RGD Symbol;Acc:1308602]
Cdk4	chr7	1819	1174	84.9578	93.2293	-8.27152	0.911278	0.000481407	0.000481407	FDR<0.05	-0.13636	negligible	347.346	339.197	355.496	0.254908	0.264237	1.04805	0.791597	0.999945	Not Sig	nonsignificant	.	.	cyclin-dependent kinase 4 [Source:RGD Symbol;Acc:621120]
Cpt1c	chr1	1054	733	106.969	120.362	-13.3928	0.88873	0.000491058	0.000491058	FDR<0.05	-0.218832	small	209.931	212.175	207.688	0.279634	-0.112462	0.978851	0.910457	0.999945	Not Sig	nonsignificant	.	.	carnitine palmitoyltransferase 1c [Source:RGD Symbol;Acc:1305384]
Tbrg1	chr8	714	537	86.6662	101.013	-14.3467	0.857972	0.000491746	0.000491746	FDR<0.05	-0.223156	small	127.955	123.959	131.952	0.325575	0.262973	1.06448	0.792572	0.999945	Not Sig	nonsignificant	.	.	transforming growth factor beta regulator 1 [Source:RGD Symbol;Acc:1305123]
Gdap1	chr5	422	259	97.5366	123.839	-26.3028	0.787606	0.000494498	0.000494498	FDR<0.05	-0.291477	small	41.5499	33.8047	49.2951	0.501362	1.06565	1.45823	0.286582	0.999945	Not Sig	nonsignificant	.	.	ganglioside-induced differentiation-associated-protein 1 [Source:RGD Symbol;Acc:1309005]
Mrps12	chr1	1536	1072	94.7946	104.856	-10.0618	0.904042	0.000498095	0.000498095	FDR<0.05	-0.118229	negligible	310.066	310.89	309.241	0.257882	-0.017518	0.994697	0.986023	0.999945	Not Sig	nonsignificant	.	.	mitochondrial ribosomal protein S12 [Source:RGD Symbol;Acc:1306221]
Smn1	chr2	635	460	79.6897	97.6414	-17.9516	0.816147	0.000500811	0.000500811	FDR<0.05	-0.228479	small	136.843	139.171	134.515	0.322476	-0.147387	0.966545	0.882827	0.999945	Not Sig	nonsignificant	.	.	survival of motor neuron 1, telomeric [Source:RGD Symbol;Acc:620755]
Rpf2	chr20	1333	952	86.6284	97.0371	-10.4086	0.892735	0.000507917	0.000507917	FDR<0.05	-0.128333	negligible	275.607	287.561	263.654	0.263751	-0.477864	0.916863	0.632747	0.999945	Not Sig	nonsignificant	.	.	ribosome production factor 2 homolog [Source:RGD Symbol;Acc:1306906]
Rplp2	chr1	18486	11910	66.1983	68.4274	-2.2291	0.967424	0.000509044	0.000509044	FDR<0.05	-0.0571102	negligible	972.886	925.233	1020.54	0.218351	0.654108	1.10301	0.513042	0.999945	Not Sig	nonsignificant	.	.	ribosomal protein lateral stalk subunit P2 [Source:RGD Symbol;Acc:621775]
Elf2	chr2	101	71	73.1793	115.38	-42.2003	0.634248	0.000509544	0.000509544	FDR<0.05	-0.58232	medium	20.1288	21.2619	18.9957	0.702281	-0.229202	0.893416	0.818712	0.999945	Not Sig	nonsignificant	.	.	E74 like ETS transcription factor 2 [Source:RGD Symbol;Acc:1310585]
Pqbp1	chrX	1768	1176	93.1577	100.39	-7.23184	0.927962	0.000521729	0.000521729	FDR<0.05	-0.118862	negligible	337.075	341.634	332.517	0.25869	-0.165254	0.973315	0.868744	0.999945	Not Sig	nonsignificant	.	.	polyglutamine binding protein 1 [Source:RGD Symbol;Acc:1549750]
Xpnpep1	chr1	1767	1171	99.8834	109.235	-9.35175	0.914389	0.000524198	0.000524198	FDR<0.05	-0.124046	negligible	357.693	358.968	356.418	0.25675	-0.0554343	0.992895	0.955792	0.999945	Not Sig	nonsignificant	.	Y	X-prolyl aminopeptidase 1 [Source:RGD Symbol;Acc:621274]
LOC103690742	chr9	3879	3141	101.352	107.35	-5.99856	0.944122	0.000524389	0.000524389	FDR<0.05	-0.0831362	negligible	482.049	549.641	414.457	0.252306	-1.60293	0.754051	0.108951	0.999945	Not Sig	nonsignificant	.	Y	uncharacterized LOC103690742 [Source:RGD Symbol;Acc:9281506]
Araf	chrX	3798	2717	115.723	123.062	-7.33968	0.940358	0.00052445	0.00052445	FDR<0.05	-0.0817809	negligible	719.504	740.615	698.393	0.24759	-0.354526	0.942991	0.722945	0.999945	Not Sig	nonsignificant	.	Y	A-Raf proto-oncogene, serine/threonine kinase [Source:RGD Symbol;Acc:2148]
Pms1	chr9	138	106	79.0997	113.684	-34.5844	0.695785	0.000524994	0.000524994	FDR<0.05	-0.41152	small	23.6178	30.5052	16.7304	0.636469	-1.36221	0.548446	0.173132	0.999945	Not Sig	nonsignificant	.	.	PMS1 homolog 1, mismatch repair system component [Source:RGD Symbol;Acc:1359511]
LOC120097345	chr1	1134	828	62.1616	71.2025	-9.04082	0.873027	0.000526208	0.000526208	FDR<0.05	-0.104677	negligible	1940.01	1882.89	1997.13	0.203082	0.418466	1.06067	0.675607	0.999945	Not Sig	nonsignificant	.	.	60S ribosomal protein L7a [Source:RGD Symbol;Acc:41344265]
LOC100360057	chr4	8888	5660	66.6899	69.9441	-3.25416	0.953475	0.000529311	0.000529311	FDR<0.05	-0.0796285	negligible	1624.25	1587.7	1660.81	0.212136	0.31138	1.04604	0.755512	0.999945	Not Sig	nonsignificant	.	Y
LOC100362432	chr3	621	439	69.8374	81.9879	-12.1505	0.851801	0.00052956	0.00052956	FDR<0.05	-0.204879	small	117.282	125.242	109.322	0.355499	-0.554904	0.87289	0.57896	0.999945	Not Sig	nonsignificant	.	.
Fkbp2	chr1	7066	4799	64.8369	68.8759	-4.03902	0.941358	0.000530928	0.000530928	FDR<0.05	-0.0575458	negligible	1027.87	1030.26	1025.47	0.213879	-0.0309566	0.995346	0.975304	0.999945	Not Sig	nonsignificant	Y	.	FKBP prolyl isomerase 2 [Source:RGD Symbol;Acc:1560660]
Tmem186	chr10	307	279	104.872	135.754	-30.882	0.772516	0.000531618	0.000531618	FDR<0.05	-0.195421	negligible	62.9258	72.8471	53.0046	0.440657	-1.0819	0.727614	0.279298	0.999945	Not Sig	nonsignificant	.	Y	transmembrane protein 186 [Source:RGD Symbol;Acc:1561167]
Secisbp2l	chr3	478	332	92.9342	114.052	-21.1177	0.814841	0.000534451	0.000534451	FDR<0.05	-0.239542	small	39.2944	38.2562	40.3326	0.511255	0.130397	1.05428	0.896253	0.999945	Not Sig	nonsignificant	.	Y	SECIS binding protein 2-like [Source:RGD Symbol;Acc:1559930]
Nav1	chr13	317	222	93.1461	120.264	-27.118	0.774513	0.000538666	0.000538666	FDR<0.05	-0.298208	small	20.0329	22.4139	17.6519	0.695249	-0.469598	0.787544	0.638642	0.999945	Not Sig	nonsignificant	.	Y	neuron navigator 1 [Source:RGD Symbol;Acc:1590261]
Scamp4	chr7	1140	836	94.1202	105.828	-11.7075	0.889372	0.00053992	0.00053992	FDR<0.05	-0.161035	negligible	234.335	238.178	230.491	0.282633	-0.18828	0.967728	0.850657	0.999945	Not Sig	nonsignificant	.	.	secretory carrier membrane protein 4 [Source:RGD Symbol;Acc:68354]
Dgkd	chr9	237	158	101.218	135.835	-34.6166	0.745157	0.000545913	0.000545913	FDR<0.05	-0.330821	small	26.2851	27.5988	24.9713	0.60412	-0.247856	0.904797	0.804246	0.999945	Not Sig	nonsignificant	.	.	diacylglycerol kinase, delta [Source:RGD Symbol;Acc:1563309]
Hapln4	chr16	1172	688	127.762	142.149	-14.3861	0.898796	0.000546936	0.000546936	FDR<0.05	-0.148585	negligible	39.8934	39.8521	39.9347	0.561472	0.0652057	1.00207	0.94801	0.999945	Not Sig	nonsignificant	.	.	hyaluronan and proteoglycan link protein 4 [Source:RGD Symbol;Acc:1308408]
Klc2	chr1	2616	1767	106.769	117.363	-10.5936	0.909737	0.000551587	0.000551587	FDR<0.05	-0.114054	negligible	313.15	319.922	306.379	0.272006	-0.206058	0.957669	0.836746	0.999945	Not Sig	nonsignificant	.	.	kinesin light chain 2 [Source:RGD Symbol;Acc:1307377]
Rgs6	chr6	470	302	85.0274	104.985	-19.9576	0.8099	0.000553011	0.000553011	FDR<0.05	-0.263847	small	11.0358	10.3953	11.6763	0.913963	0.190553	1.12323	0.848876	0.999945	Not Sig	nonsignificant	Y	.	regulator of G-protein signaling 6 [Source:RGD Symbol;Acc:3569]
Nell2	chr7	4861	3091	98.2105	105.971	-7.76077	0.926765	0.000553351	0.000553351	FDR<0.05	-0.0940736	negligible	906.754	894.965	918.542	0.23025	0.168166	1.02634	0.866453	0.999945	Not Sig	nonsignificant	.	.	neural EGFL like 2 [Source:RGD Symbol;Acc:620999]
Tor1a	chr3	614	412	79.9143	93.3265	-13.4121	0.856288	0.000558737	0.000558737	FDR<0.05	-0.199535	negligible	123.863	129.142	118.583	0.342447	-0.330291	0.918242	0.74118	0.999945	Not Sig	nonsignificant	.	.	torsin family 1, member A [Source:RGD Symbol;Acc:628863]
Med10	chr1	2166	1515	83.1322	93.0096	-9.87743	0.893802	0.000566666	0.000566666	FDR<0.05	-0.104739	negligible	444.133	453.099	435.168	0.239359	-0.234639	0.960426	0.814489	0.999945	Not Sig	nonsignificant	.	.	mediator complex subunit 10 [Source:RGD Symbol;Acc:1310128]
Nptn	chr8	5733	3566	108.561	115.395	-6.83451	0.940773	0.000567831	0.000567831	FDR<0.05	-0.0651089	negligible	1029.47	1008.95	1050	0.222748	0.262519	1.04068	0.792921	0.999945	Not Sig	nonsignificant	Y	Y	neuroplastin [Source:RGD Symbol;Acc:620296]
Amd1	chr20	4584	2341	116.029	110.7	5.32883	1.04814	0.000570434	0.000570434	FDR<0.05	0.0854562	negligible	713.165	617.886	808.443	0.234542	1.63876	1.3084	0.101264	0.999945	Not Sig	nonsignificant	.	.	adenosylmethionine decarboxylase 1 [Source:RGD Symbol;Acc:2104]
Pdrg1	chr3	2323	1500	71.2947	78.1472	-6.85252	0.912313	0.000578127	0.000578127	FDR<0.05	-0.0977903	negligible	309.339	308.639	310.04	0.265495	0.0320867	1.00454	0.974403	0.999945	Not Sig	nonsignificant	.	Y	p53 and DNA damage regulated 1 [Source:RGD Symbol;Acc:1305096]
Ech1	chr1	1433	1090	90.3016	101.27	-10.9682	0.891693	0.000578158	0.000578158	FDR<0.05	-0.125044	negligible	300.266	315.343	285.189	0.262483	-0.561449	0.904376	0.574491	0.999945	Not Sig	nonsignificant	.	.	enoyl-CoA hydratase 1 [Source:RGD Symbol;Acc:69353]
LOC100362339	chr17	22895	14141	57.1162	58.6745	-1.5583	0.973442	0.000580367	0.000580367	FDR<0.05	-0.0478799	negligible	3223.58	3174.49	3272.67	0.203359	0.218194	1.03093	0.827278	0.999945	Not Sig	nonsignificant	.	.
Mettl26	chr10	401	219	114.091	136.024	-21.9327	0.838758	0.000580535	0.000580535	FDR<0.05	-0.263998	small	68.9384	67.3198	70.557	0.423278	0.20531	1.04809	0.83733	0.999945	Not Sig	nonsignificant	.	.	methyltransferase like 26 [Source:RGD Symbol;Acc:1307155]
Hps3	chr2	137	115	92.081	127.305	-35.2238	0.723311	0.0005875	0.0005875	FDR<0.05	-0.409067	small	27.3844	30.2705	24.4984	0.645659	-0.525957	0.809315	0.598918	0.999945	Not Sig	nonsignificant	.	Y	HPS3, biogenesis of lysosomal organelles complex 2 subunit 1 [Source:RGD Symbol;Acc:1310548]
Fam120b	chr1	1342	565	123.403	112.349	11.0547	1.0984	0.000588902	0.000588902	FDR<0.05	0.150063	negligible	162.192	139.252	185.132	0.313115	1.28265	1.32948	0.199616	0.999945	Not Sig	nonsignificant	.	Y	family with sequence similarity 120B [Source:RGD Symbol;Acc:1310304]
Tmem38a	chr16	1728	1076	82.7489	91.7765	-9.02762	0.901635	0.000591177	0.000591177	FDR<0.05	-0.147863	negligible	282.407	269.913	294.902	0.267741	0.467528	1.09258	0.640122	0.999945	Not Sig	nonsignificant	.	.	transmembrane protein 38a [Source:RGD Symbol;Acc:1307901]
Svop	chr12	2156	1206	84.6081	93.8215	-9.21342	0.901798	0.000591401	0.000591401	FDR<0.05	-0.102319	negligible	347.106	325.866	368.346	0.26491	0.691654	1.13036	0.489155	0.999945	Not Sig	nonsignificant	.	.	SV2 related protein [Source:RGD Symbol;Acc:620277]
Zhx1	chr7	370	273	73.5778	91.1517	-17.5739	0.807201	0.000593457	0.000593457	FDR<0.05	-0.305818	small	84.2428	89.2898	79.1958	0.37451	-0.460058	0.886953	0.645475	0.999945	Not Sig	nonsignificant	.	Y	zinc fingers and homeoboxes 1 [Source:RGD Symbol;Acc:620010]
Tbca	chr2	8681	5712	82.275	86.0876	-3.81263	0.955712	0.000598447	0.000598447	FDR<0.05	-0.0655934	negligible	1615.71	1584.46	1646.96	0.204761	0.272474	1.03944	0.785258	0.999945	Not Sig	nonsignificant	.	.	tubulin folding cofactor A [Source:RGD Symbol;Acc:1311538]
Gas7	chr10	1008	710	90.9388	104.865	-13.9261	0.8672	0.000601012	0.000601012	FDR<0.05	-0.20032	small	42.4211	37.863	46.9793	0.50551	0.616352	1.24077	0.537662	0.999945	Not Sig	nonsignificant	.	.	growth arrest specific 7 [Source:RGD Symbol;Acc:621550]
LOC100910788	chr12	15414	8445	77.9248	81.1505	-3.22564	0.960251	0.000601274	0.000601274	FDR<0.05	-0.0466791	negligible	2220.42	2008.53	2432.32	0.243281	1.14185	1.211	0.253516	0.999945	Not Sig	nonsignificant	.	.
Ap3m2	chr16	935	658	98.3379	111.043	-12.7049	0.885585	0.000613889	0.000613889	FDR<0.05	-0.156035	negligible	100.01	96.6496	103.37	0.384771	0.202571	1.06954	0.839471	0.999945	Not Sig	nonsignificant	Y	.	adaptor related protein complex 3 subunit mu 2 [Source:RGD Symbol;Acc:70969]
Mageh1	chrX	1585	1167	103.759	114.502	-10.7424	0.906181	0.000619654	0.000619654	FDR<0.05	-0.152761	negligible	337.346	365.305	309.387	0.270209	-0.902887	0.846927	0.366586	0.999945	Not Sig	nonsignificant	.	Y	MAGE family member H1 [Source:RGD Symbol;Acc:1359316]
Cst3	chr3	66279	41308	71.2679	70.5233	0.744667	1.01056	0.000619872	0.000619872	FDR<0.05	0.0103141	negligible	12545	12334.2	12755.8	0.217578	0.223845	1.03418	0.822878	0.999945	Not Sig	nonsignificant	.	.	cystatin C [Source:RGD Symbol;Acc:2432]
LOC683573	chr5	149	71	103.946	70.6592	33.2872	1.4711	0.000621098	0.000621098	FDR<0.05	0.499444	small	14.8155	16.2862	13.3447	0.864231	-0.270357	0.819388	0.786886	0.999945	Not Sig	nonsignificant	.	Y	similar to response gene to complement 32 [Source:RGD Symbol;Acc:1585621]
Rpsa	chr8	17414	11359	72.3785	74.6284	-2.24995	0.969851	0.000621419	0.000621419	FDR<0.05	-0.0452685	negligible	3356.81	3294.49	3419.13	0.200744	0.265761	1.03783	0.790423	0.999945	Not Sig	nonsignificant	.	.	ribosomal protein SA [Source:RGD Symbol;Acc:71026]
LOC498555	chr15	9721	5830	62.3795	65.0539	-2.67448	0.958888	0.000622644	0.000622644	FDR<0.05	-0.0660646	negligible	1087.76	1098.71	1076.8	0.211986	-0.133922	0.980063	0.893465	0.999945	Not Sig	nonsignificant	.	.	similar to 60S acidic ribosomal protein P2 [Source:RGD Symbol;Acc:1590791]
Ddx3x	chrX	1145	436	140.542	124.12	16.4217	1.1323	0.000631968	0.000631968	FDR<0.05	0.182978	negligible	143.059	96.7533	189.365	0.328062	2.9252	1.95719	0.00344237	0.466509	Not Sig	nonsignificant	.	Y	DEAD-box helicase 3, X-linked [Source:RGD Symbol;Acc:1564771]
Smim7	chr16	3741	2556	108.924	115.357	-6.43368	0.944228	0.000634374	0.000634374	FDR<0.05	-0.0528739	negligible	746.873	756.506	737.24	0.223975	-0.172407	0.974533	0.863118	0.999945	Not Sig	nonsignificant	.	.	small integral membrane protein 7 [Source:RGD Symbol;Acc:1588793]
MGC94199	chr5	416	217	102.899	128.778	-25.8789	0.799043	0.000635002	0.000635002	FDR<0.05	-0.286896	small	61.956	56.7153	67.1966	0.445489	0.592909	1.18481	0.553242	0.999945	Not Sig	nonsignificant	.	Y
Supt4h1	chr10	3489	2336	90.5472	96.5256	-5.97844	0.938064	0.000641765	0.000641765	FDR<0.05	-0.0987822	negligible	367.735	366.901	368.569	0.246652	0.0196875	1.00455	0.984293	0.999945	Not Sig	nonsignificant	.	.	SPT4 homolog, DSIF elongation factor subunit [Source:RGD Symbol;Acc:1306372]
Nudt22	chr1	552	406	94.0214	110.841	-16.8197	0.848254	0.000641843	0.000641843	FDR<0.05	-0.211155	small	107.596	104.976	110.217	0.353928	0.166053	1.04993	0.868115	0.999945	Not Sig	nonsignificant	.	.	nudix hydrolase 22 [Source:RGD Symbol;Acc:735224]
Smarcb1	chr20	2528	1795	104.433	112.773	-8.3404	0.926043	0.000645518	0.000645518	FDR<0.05	-0.091565	negligible	545.399	569.467	521.331	0.239622	-0.539898	0.915472	0.589267	0.999945	Not Sig	nonsignificant	.	Y	SWI/SNF related, matrix associated, actin dependent regulator of chromatin, subfamily b, member 1 [Source:RGD Symbol;Acc:1308761]
Ece2	chr11	209	100	119.888	163.23	-43.3416	0.734474	0.000646677	0.000646677	FDR<0.05	-0.411235	small	30.7556	28.6726	32.8387	0.570527	0.317576	1.1453	0.750806	0.999945	Not Sig	nonsignificant	.	.	endothelin-converting enzyme 2 [Source:RGD Symbol;Acc:1303039]
Hsdl1	chr19	157	147	83.8062	109.582	-25.7761	0.764778	0.000646868	0.000646868	FDR<0.05	-0.364728	small	23.2179	29.4314	17.0044	0.643038	-1.21535	0.577765	0.224233	0.999945	Not Sig	nonsignificant	.	.	hydroxysteroid dehydrogenase like 1 [Source:RGD Symbol;Acc:1308433]
Ttc3	chr11	1580	1024	118.946	131.751	-12.8048	0.902811	0.000647808	0.000647808	FDR<0.05	-0.134149	negligible	239.894	245.557	234.231	0.332283	-0.17905	0.953878	0.857898	0.999945	Not Sig	nonsignificant	.	.	tetratricopeptide repeat domain 3 [Source:RGD Symbol;Acc:1308654]
Nrip2	chr4	179	135	127.561	170.218	-42.657	0.749397	0.000650657	0.000650657	FDR<0.05	-0.332566	small	32.572	30.1649	34.9792	0.564806	0.367416	1.1596	0.713308	0.999945	Not Sig	nonsignificant	.	.	nuclear receptor interacting protein 2 [Source:RGD Symbol;Acc:1589959]
RGD1597339	chr1	915	623	80.0061	92.4104	-12.4044	0.865769	0.000651915	0.000651915	FDR<0.05	-0.183679	negligible	173.6	168.368	178.831	0.297806	0.282185	1.06215	0.777801	0.999945	Not Sig	nonsignificant	.	Y
Rab5b	chr7	2050	1424	95.3434	103.068	-7.72438	0.925055	0.000656322	0.000656322	FDR<0.05	-0.122374	negligible	291.173	285.208	297.137	0.303009	0.16657	1.04183	0.867708	0.999945	Not Sig	nonsignificant	.	.	RAB5B, member RAS oncogene family [Source:RGD Symbol;Acc:1306489]
Ndufaf5	chr3	1693	1149	81.8248	90.1889	-8.3641	0.90726	0.000663384	0.000663384	FDR<0.05	-0.136155	negligible	328.909	327.415	330.403	0.252904	0.0429737	1.00913	0.965722	0.999945	Not Sig	nonsignificant	.	.	NADH:ubiquinone oxidoreductase complex assembly factor 5 [Source:RGD Symbol;Acc:1309829]
Zfp706	chr7	2315	1237	97.3647	107.746	-10.3816	0.903648	0.000663728	0.000663728	FDR<0.05	-0.119592	negligible	11.8037	9.71464	13.8927	0.925644	0.544612	1.43008	0.58602	0.999945	Not Sig	nonsignificant	.	Y	zinc finger protein 706 [Source:RGD Symbol;Acc:1563959]
Nol7	chr17	2824	1689	91.9146	99.8444	-7.92981	0.920578	0.000665451	0.000665451	FDR<0.05	-0.103266	negligible	472.764	447.497	498.032	0.234848	0.655245	1.11293	0.51231	0.999945	Not Sig	nonsignificant	.	.	nucleolar protein 7 [Source:RGD Symbol;Acc:1565934]
Mrm3	chr10	272	205	83.4508	111.943	-28.4921	0.745476	0.000667335	0.000667335	FDR<0.05	-0.297109	small	58.1941	63.7074	52.6808	0.433567	-0.63689	0.826918	0.524197	0.999945	Not Sig	nonsignificant	Y	Y	mitochondrial rRNA methyltransferase 3 [Source:RGD Symbol;Acc:1309077]
Slc45a1	chr5	345	227	81.2854	99.6685	-18.383	0.815558	0.000668446	0.000668446	FDR<0.05	-0.276865	small	63.5685	66.115	61.0221	0.455105	-0.201873	0.922968	0.840016	0.999945	Not Sig	nonsignificant	.	.	solute carrier family 45, member 1 [Source:RGD Symbol;Acc:708502]
Maf1	chr7	325	251	95.2501	118.12	-22.8695	0.806387	0.000668987	0.000668987	FDR<0.05	-0.276381	small	63.0856	72.7922	53.3789	0.4518	-0.947179	0.733305	0.343547	0.999945	Not Sig	nonsignificant	.	Y	MAF1 homolog, negative regulator of RNA polymerase III [Source:RGD Symbol;Acc:1359315]
Erp29	chr12	990	569	80.4327	90.7448	-10.312	0.886362	0.000670373	0.000670373	FDR<0.05	-0.181763	negligible	101.552	91.0441	112.061	0.362117	0.835468	1.23084	0.403454	0.999945	Not Sig	nonsignificant	.	.	endoplasmic reticulum protein 29 [Source:RGD Symbol;Acc:619781]
Anxa11	chr16	2128	1347	108.849	116.306	-7.45736	0.935882	0.000678796	0.000678796	FDR<0.05	-0.0965647	negligible	437.287	422.851	451.722	0.267277	0.378682	1.06828	0.704924	0.999945	Not Sig	nonsignificant	.	Y	annexin A11 [Source:RGD Symbol;Acc:1309911]
Elof1	chr8	2132	1446	87.1452	94.1056	-6.96044	0.926036	0.000681866	0.000681866	FDR<0.05	-0.120535	negligible	419.967	421.524	418.41	0.2481	-0.0564896	0.992613	0.954952	0.999945	Not Sig	nonsignificant	.	.	elongation factor 1 [Source:RGD Symbol;Acc:1587399]
Lrrc4c	chr3	338	243	70.3199	92.5476	-22.2278	0.759824	0.000686066	0.000686066	FDR<0.05	-0.24174	small	46.3104	43.6504	48.9705	0.515018	0.291511	1.12188	0.770661	0.999945	Not Sig	nonsignificant	.	Y	leucine rich repeat containing 4C [Source:RGD Symbol;Acc:1311013]
Cnpy2	chr7	2995	1865	69.1444	74.739	-5.59459	0.925145	0.00068657	0.00068657	FDR<0.05	-0.100897	negligible	556.42	545.87	566.971	0.234673	0.245002	1.03866	0.806455	0.999945	Not Sig	nonsignificant	.	.	canopy FGF signaling regulator 2 [Source:RGD Symbol;Acc:1589072]
Fbxl2	chr8	547	404	102.152	121.609	-19.4571	0.840002	0.000690468	0.000690468	FDR<0.05	-0.251218	small	107.617	110.395	104.838	0.363698	-0.221771	0.949662	0.824492	0.999945	Not Sig	nonsignificant	.	.	F-box and leucine-rich repeat protein 2 [Source:RGD Symbol;Acc:1562243]
Zrsr1	chr14	364	192	98.4911	75.4567	23.0343	1.30527	0.000696944	0.000696944	FDR<0.05	0.313407	small	20.5865	18.0934	23.0795	0.696973	0.534669	1.27557	0.592879	0.999945	Not Sig	nonsignificant	.	Y
Pcmtd2	chr3	790	509	114.964	131.951	-16.9872	0.871261	0.000699232	0.000699232	FDR<0.05	-0.183068	negligible	161.107	169.573	152.64	0.306076	-0.510922	0.900145	0.609406	0.999945	Not Sig	nonsignificant	.	Y	protein-L-isoaspartate (D-aspartate) O-methyltransferase domain containing 2 [Source:RGD Symbol;Acc:1305684]
Fh	chr13	1933	1335	84.0303	91.635	-7.60471	0.917011	0.000699483	0.000699483	FDR<0.05	-0.100976	negligible	395.204	401.651	388.758	0.25736	-0.201433	0.967902	0.84036	0.999945	Not Sig	nonsignificant	.	.	fumarate hydratase [Source:RGD Symbol;Acc:2614]
Bex3	chrX	4839	2095	93.0585	100.744	-7.68557	0.923712	0.000701819	0.000701819	FDR<0.05	-0.0797124	negligible	756.371	623.522	889.221	0.327485	1.58069	1.42613	0.113949	0.999945	Not Sig	nonsignificant	.	.	brain expressed X-linked 3 [Source:RGD Symbol;Acc:3148]
Efna3	chr2	171	121	87.6702	113.135	-25.4651	0.774915	0.000702421	0.000702421	FDR<0.05	-0.35356	small	9.24069	8.77192	9.70946	0.997798	0.133588	1.10688	0.893728	0.999945	Not Sig	nonsignificant	Y	.	ephrin A3 [Source:RGD Symbol;Acc:620390]
Scnm1	chr2	474	394	72.4143	85.5058	-13.0915	0.846894	0.000707325	0.000707325	FDR<0.05	-0.213653	small	93.4825	106.624	80.3407	0.366381	-1.12389	0.753493	0.261059	0.999945	Not Sig	nonsignificant	.	.	sodium channel modifier 1 [Source:RGD Symbol;Acc:1308968]
Pigf	chr6	1086	657	80.2494	92.2539	-12.0044	0.869876	0.000716215	0.000716215	FDR<0.05	-0.164724	negligible	173.008	173.185	172.831	0.297518	-0.00513151	0.997957	0.995906	0.999945	Not Sig	nonsignificant	.	.	phosphatidylinositol glycan anchor biosynthesis, class F [Source:RGD Symbol;Acc:1584658]
Cpox	chr11	74	59	84.0384	130.646	-46.6077	0.643252	0.000722274	0.000722274	FDR<0.05	-0.695216	medium	9.99944	12.2807	7.71818	0.978144	-0.682354	0.628481	0.495015	0.999945	Not Sig	nonsignificant	.	Y	coproporphyrinogen oxidase [Source:RGD Symbol;Acc:1311817]
Mrpl14	chr9	2202	1581	90.5291	96.8191	-6.29002	0.935033	0.000722828	0.000722828	FDR<0.05	-0.116208	negligible	421.832	437.599	406.065	0.240663	-0.44575	0.927938	0.655778	0.999945	Not Sig	nonsignificant	.	.	mitochondrial ribosomal protein L14 [Source:RGD Symbol;Acc:1306240]
Zmat5	chr14	809	518	87.4116	102.2	-14.7885	0.855299	0.000723486	0.000723486	FDR<0.05	-0.183806	negligible	154.908	152.395	157.421	0.304961	0.159043	1.03298	0.873635	0.999945	Not Sig	nonsignificant	.	.	zinc finger, matrin type 5 [Source:RGD Symbol;Acc:1559774]
RGD1310553	chr9	221	164	94.934	128.62	-33.6856	0.738099	0.000724795	0.000724795	FDR<0.05	-0.376232	small	38.5166	40.5601	36.4731	0.518976	-0.300034	0.899236	0.764151	0.999945	Not Sig	nonsignificant	Y	Y	similar to expressed sequence AI597479 [Source:RGD Symbol;Acc:1310553]
Chchd3	chr4	3936	2533	84.6248	90.8221	-6.19728	0.931765	0.000727274	0.000727274	FDR<0.05	-0.084246	negligible	736.799	733.72	739.877	0.221373	0.0594539	1.00839	0.952591	0.999945	Not Sig	nonsignificant	.	Y	coiled-coil-helix-coiled-coil-helix domain containing 3 [Source:RGD Symbol;Acc:1310325]
Dnm1	chr3	3745	2093	121.854	131.614	-9.7605	0.92584	0.000728147	0.000728147	FDR<0.05	-0.074916	negligible	495.61	467.916	523.305	0.259277	0.642921	1.11837	0.520275	0.999945	Not Sig	nonsignificant	.	.	dynamin 1 [Source:RGD Symbol;Acc:71096]
Cldn12	chr4	219	168	70.6186	94.1155	-23.4969	0.750339	0.000738118	0.000738118	FDR<0.05	-0.35004	small	35.168	39.5392	30.7968	0.538153	-0.689448	0.778894	0.490542	0.999945	Not Sig	nonsignificant	Y	Y	claudin 12 [Source:RGD Symbol;Acc:1561053]
Tbc1d8b	chrX	68	56	82.261	130.668	-48.4067	0.629543	0.000740092	0.000740092	FDR<0.05	-0.602897	medium	11.5486	9.97673	13.1205	0.924027	0.368991	1.31511	0.712135	0.999945	Not Sig	nonsignificant	Y	Y	TBC1 domain family member 8B [Source:RGD Symbol;Acc:1563084]
Mrpl52	chr15	3987	2665	78.8331	83.6244	-4.79133	0.942704	0.00074095	0.00074095	FDR<0.05	-0.075482	negligible	624.82	617.614	632.027	0.240445	0.15371	1.02334	0.877838	0.999945	Not Sig	nonsignificant	.	Y	mitochondrial ribosomal protein L52 [Source:RGD Symbol;Acc:1309297]
St3gal5	chr4	665	478	81.0407	95.7037	-14.6631	0.846787	0.000752466	0.000752466	FDR<0.05	-0.209171	small	95.496	107.986	83.0065	0.378981	-0.990485	0.768681	0.321937	0.999945	Not Sig	nonsignificant	Y	Y	ST3 beta-galactoside alpha-2,3-sialyltransferase 5 [Source:RGD Symbol;Acc:620875]
Cep20	chr10	1172	847	103.353	118.708	-15.3545	0.870653	0.000752799	0.000752799	FDR<0.05	-0.158053	negligible	240.968	249.752	232.183	0.298092	-0.379826	0.929654	0.704075	0.999945	Not Sig	nonsignificant	.	Y	centrosomal protein 20 [Source:RGD Symbol;Acc:1305823]
Pmm1	chr7	4005	2897	89.2161	94.9548	-5.73864	0.939565	0.000754085	0.000754085	FDR<0.05	-0.072223	negligible	809.523	826.839	792.208	0.225504	-0.283182	0.958115	0.777037	0.999945	Not Sig	nonsignificant	.	.	phosphomannomutase 1 [Source:RGD Symbol;Acc:1310897]
Lhfpl5	chr20	365	250	95.053	121.685	-26.632	0.78114	0.000756162	0.000756162	FDR<0.05	-0.24472	small	73.5927	75.8571	71.3284	0.394896	-0.226068	0.9403	0.821148	0.999945	Not Sig	nonsignificant	.	.	LHFPL tetraspan subfamily member 5 [Source:RGD Symbol;Acc:1359370]
Apoo	chrX	2473	1650	88.5147	97.2931	-8.77842	0.909773	0.000763432	0.000763432	FDR<0.05	-0.0977827	negligible	483.828	480.754	486.902	0.240933	0.0623418	1.01279	0.950291	0.999945	Not Sig	nonsignificant	.	.	apolipoprotein O [Source:RGD Symbol;Acc:1565289]
Rgl1	chr13	387	275	92.8072	107.659	-14.8522	0.862045	0.000763769	0.000763769	FDR<0.05	-0.275063	small	58.5265	63.551	53.502	0.456127	-0.576612	0.841875	0.564202	0.999945	Not Sig	nonsignificant	.	Y	ral guanine nucleotide dissociation stimulator,-like 1 [Source:RGD Symbol;Acc:1308947]
Dcaf4	chr6	299	223	77.287	100.424	-23.1367	0.76961	0.000766573	0.000766573	FDR<0.05	-0.262247	small	67.4487	69.5202	65.3772	0.437465	-0.201594	0.940407	0.840234	0.999945	Not Sig	nonsignificant	.	.	DDB1 and CUL4 associated factor 4 [Source:RGD Symbol;Acc:1306241]
Gorasp2	chr3	789	495	87.7212	105.156	-17.4346	0.834202	0.000767624	0.000767624	FDR<0.05	-0.136849	negligible	144.467	146.948	141.986	0.316382	-0.137202	0.966233	0.890871	0.999945	Not Sig	nonsignificant	.	Y	golgi reassembly stacking protein 2 [Source:RGD Symbol;Acc:619911]
Tmem223	chr1	1738	1350	88.9224	97.6214	-8.69898	0.910891	0.000768756	0.000768756	FDR<0.05	-0.0946071	negligible	354.021	376.17	331.871	0.247207	-0.732746	0.882238	0.463713	0.999945	Not Sig	nonsignificant	.	.	transmembrane protein 223 [Source:RGD Symbol;Acc:1582829]
Stx12	chr5	2454	1647	102.043	112.404	-10.3611	0.907823	0.000773079	0.000773079	FDR<0.05	-0.103732	negligible	445.459	442.657	448.262	0.251987	0.0527807	1.01266	0.957907	0.999945	Not Sig	nonsignificant	.	Y	syntaxin 12 [Source:RGD Symbol;Acc:620977]
Sirt6	chr7	671	457	89.1956	104.982	-15.7862	0.84963	0.000776087	0.000776087	FDR<0.05	-0.142997	negligible	132.725	140.271	125.179	0.327699	-0.48358	0.892414	0.628684	0.999945	Not Sig	nonsignificant	.	.	sirtuin 6 [Source:RGD Symbol;Acc:1305216]
Cdipt	chr1	1061	629	91.5696	102.415	-10.8456	0.894102	0.000778231	0.000778231	FDR<0.05	-0.158399	negligible	171.797	172.006	171.589	0.314791	0.0155708	0.997575	0.987577	0.999945	Not Sig	nonsignificant	.	.	CDP-diacylglycerol--inositol 3-phosphatidyltransferase [Source:RGD Symbol;Acc:620576]
Bcap31	chrX	3664	2566	81.365	86.9846	-5.61957	0.935396	0.000780669	0.000780669	FDR<0.05	-0.0969536	negligible	730.271	732.367	728.175	0.235499	-0.0488787	0.994276	0.961016	0.999945	Not Sig	nonsignificant	.	.	B-cell receptor-associated protein 31 [Source:RGD Symbol;Acc:1302944]
Dnajc30	chr12	653	445	81.9339	94.8624	-12.9284	0.863714	0.000784402	0.000784402	FDR<0.05	-0.209897	small	102.388	102.801	101.975	0.368779	-0.0230305	0.99197	0.981626	0.999945	Not Sig	nonsignificant	.	.	DnaJ heat shock protein family (Hsp40) member C30 [Source:RGD Symbol;Acc:1595783]
Ola1	chr3	5029	3463	92.7019	98.8392	-6.13724	0.937907	0.000785789	0.000785789	FDR<0.05	-0.0850053	negligible	1053.99	1036.61	1071.37	0.240859	0.185058	1.03353	0.853183	0.999945	Not Sig	nonsignificant	.	.	Obg-like ATPase 1 [Source:RGD Symbol;Acc:1307982]
Dbnl	chr14	693	398	98.5171	117.028	-18.5106	0.841827	0.000796802	0.000796802	FDR<0.05	-0.215979	small	85.6299	78.3703	92.8896	0.37822	0.672709	1.18526	0.501133	0.999945	Not Sig	nonsignificant	.	.	drebrin-like [Source:RGD Symbol;Acc:70941]
Gprasp1	chrX	1489	949	97.4003	110.066	-12.6655	0.884928	0.00080216	0.00080216	FDR<0.05	-0.162646	negligible	111.972	116.417	107.528	0.345258	-0.335204	0.923639	0.737472	0.999945	Not Sig	nonsignificant	.	.	G protein-coupled receptor associated sorting protein 1 [Source:RGD Symbol;Acc:621343]
Tctn2	chr12	137	94	100.473	152.739	-52.2657	0.65781	0.000805324	0.000805324	FDR<0.05	-0.421388	small	27.3754	29.4314	25.3195	0.60644	-0.347953	0.860288	0.727876	0.999945	Not Sig	nonsignificant	.	Y
Med21	chr4	1747	1154	102.424	112.252	-9.82784	0.912449	0.000811387	0.000811387	FDR<0.05	-0.108815	negligible	327.736	321.26	334.213	0.252729	0.231518	1.04032	0.816912	0.999945	Not Sig	nonsignificant	Y	.	mediator complex subunit 21 [Source:RGD Symbol;Acc:1309836]
Commd6	chr15	1504	1119	97.6619	110.185	-12.5236	0.886341	0.000813749	0.000813749	FDR<0.05	-0.10736	negligible	297.443	301.283	293.603	0.269318	-0.153557	0.974511	0.877959	0.999945	Not Sig	nonsignificant	.	.	COMM domain containing 6 [Source:RGD Symbol;Acc:1560745]
Ndufs1	chr9	1912	1289	102.344	114.239	-11.8949	0.895877	0.000815425	0.000815425	FDR<0.05	-0.109207	negligible	358.9	342.709	375.091	0.269362	0.457767	1.09449	0.64712	0.999945	Not Sig	nonsignificant	.	.	NADH:ubiquinone oxidoreductase core subunit S1 [Source:RGD Symbol;Acc:1359670]
Mrps23	chr10	1591	1066	93.2016	101.649	-8.4469	0.916901	0.000816153	0.000816153	FDR<0.05	-0.158873	negligible	13.3745	11.338	15.4111	0.829833	0.535161	1.35924	0.592539	0.999945	Not Sig	nonsignificant	.	.	mitochondrial ribosomal protein S23 [Source:RGD Symbol;Acc:1306963]
C1d	chr14	1819	1264	85.354	94.9147	-9.56067	0.899271	0.000817787	0.000817787	FDR<0.05	-0.115724	negligible	341.419	349.698	333.141	0.249864	-0.285834	0.952655	0.775005	0.999945	Not Sig	nonsignificant	.	Y	C1D nuclear receptor corepressor [Source:RGD Symbol;Acc:1560600]
Ide	chr1	117	82	106.537	147.609	-41.072	0.721751	0.000819427	0.000819427	FDR<0.05	-0.520767	medium	14.0997	13.4855	14.7138	0.829937	0.103122	1.09109	0.917866	0.999945	Not Sig	nonsignificant	.	Y	insulin degrading enzyme [Source:RGD Symbol;Acc:2861]
Sh3glb2	chr3	2574	1441	107.832	118.012	-10.1797	0.91374	0.000821167	0.000821167	FDR<0.05	-0.129091	negligible	357.473	331.782	383.164	0.301733	0.713384	1.15487	0.475608	0.999945	Not Sig	nonsignificant	.	.	SH3 domain-containing GRB2-like endophilin B2 [Source:RGD Symbol;Acc:1305886]
Pck2	chr15	366	303	107.97	134.046	-26.0757	0.805472	0.000821472	0.000821472	FDR<0.05	-0.273642	small	80.4958	90.2853	70.7062	0.381464	-0.938061	0.783142	0.348213	0.999945	Not Sig	nonsignificant	.	.	phosphoenolpyruvate carboxykinase 2 (mitochondrial) [Source:RGD Symbol;Acc:1311112]
Dmrtc1a	chrX	63	46	98.5257	151.657	-53.1312	0.649662	0.000825994	0.000825994	FDR<0.05	-0.67188	medium	13.174	14.3226	12.0254	0.896198	-0.227592	0.839609	0.819964	0.999945	Not Sig	nonsignificant	.	Y
Sfrp4	chr17	47	43	110.515	60.6882	49.8263	1.82102	0.000836298	0.000836298	FDR<0.05	0.557243	medium	9.32796	8.77192	9.88399	0.977604	0.168554	1.12678	0.866147	0.999945	Not Sig	nonsignificant	.	.	secreted frizzled-related protein 4 [Source:RGD Symbol;Acc:621075]
LOC120102853	chr5	41	31	84.9501	131.171	-46.2206	0.64763	0.000843532	0.000843532	FDR<0.05	-0.682224	medium	8.03977	5.9966	10.0829	1.13556	0.586509	1.68144	0.557534	0.999945	Not Sig	nonsignificant	.	.
Ndufs2	chr13	4887	3327	91.966	97.0768	-5.11079	0.947353	0.00084595	0.00084595	FDR<0.05	-0.0782516	negligible	973.155	985.724	960.586	0.213332	-0.174506	0.974498	0.861468	0.999945	Not Sig	nonsignificant	.	.	NADH:ubiquinone oxidoreductase core subunit S2 [Source:RGD Symbol;Acc:1307109]
B9d1	chr10	948	701	112.763	126.201	-13.4388	0.893513	0.000850002	0.000850002	FDR<0.05	-0.175155	negligible	180.387	187.719	173.055	0.303005	-0.405125	0.921881	0.685385	0.999945	Not Sig	nonsignificant	.	.	B9 domain containing 1 [Source:RGD Symbol;Acc:1305522]
Ptgds	chr3	7280	5403	101.096	98.2983	2.79794	1.02846	0.000852718	0.000852718	FDR<0.05	0.0584411	negligible	1441.71	1556.54	1326.89	0.221969	-1.03009	0.852464	0.302968	0.999945	Not Sig	nonsignificant	.	.	prostaglandin D2 synthase [Source:RGD Symbol;Acc:3433]
Dhrs7	chr6	2150	1363	86.2357	94.6821	-8.44642	0.910792	0.000855809	0.000855809	FDR<0.05	-0.0846171	negligible	421.171	414.768	427.573	0.245587	0.164399	1.03087	0.869417	0.999945	Not Sig	nonsignificant	.	.	dehydrogenase/reductase 7 [Source:RGD Symbol;Acc:1565002]
Gdap1l1	chr3	1138	610	93.3653	105.905	-12.5402	0.88159	0.000857015	0.000857015	FDR<0.05	-0.164302	negligible	195.778	191.983	199.573	0.339174	0.204242	1.03954	0.838164	0.999945	Not Sig	nonsignificant	.	.	ganglioside-induced differentiation-associated protein 1-like 1 [Source:RGD Symbol;Acc:1304960]
Grn	chr10	1055	671	89.2435	102.546	-13.3022	0.87028	0.000857991	0.000857991	FDR<0.05	-0.183759	negligible	204.64	213.667	195.613	0.284114	-0.445459	0.915505	0.655988	0.999945	Not Sig	nonsignificant	.	.	granulin precursor [Source:RGD Symbol;Acc:61983]
Dnajc5	chr3	1737	969	104.944	116.93	-11.9853	0.8975	0.000861767	0.000861767	FDR<0.05	-0.128406	negligible	199.835	174.703	224.966	0.292505	1.27385	1.28771	0.202718	0.999945	Not Sig	nonsignificant	.	.	DnaJ heat shock protein family (Hsp40) member C5 [Source:RGD Symbol;Acc:620516]
Kif2a	chr2	381	288	93.1586	119.319	-26.1605	0.780752	0.000863051	0.000863051	FDR<0.05	-0.258099	small	40.4574	48.624	32.2907	0.530843	-1.07175	0.66409	0.283834	0.999945	Not Sig	nonsignificant	.	Y	kinesin family member 2A [Source:RGD Symbol;Acc:70974]
Rasgrf2	chr2	613	422	105.859	126.121	-20.2617	0.839348	0.000865989	0.000865989	FDR<0.05	-0.23649	small	28.3234	25.4513	31.1956	0.593644	0.523287	1.2257	0.600774	0.999945	Not Sig	nonsignificant	.	.	RAS protein-specific guanine nucleotide-releasing factor 2 [Source:RGD Symbol;Acc:69413]
Chac2	chr14	460	377	91.9659	110.983	-19.0171	0.828648	0.000879984	0.000879984	FDR<0.05	-0.209145	small	101.61	113.145	90.0745	0.377911	-0.897516	0.796097	0.369444	0.999945	Not Sig	nonsignificant	.	.	ChaC glutathione specific gamma-glutamylcyclotransferase 2 [Source:RGD Symbol;Acc:1309120]
Pkig	chr3	1530	661	80.5689	90.0321	-9.46322	0.894891	0.000889863	0.000889863	FDR<0.05	-0.165731	negligible	242.565	188.66	296.47	0.277521	2.36945	1.57145	0.0178145	0.999945	Not Sig	nonsignificant	Y	.	cAMP-dependent protein kinase inhibitor gamma [Source:RGD Symbol;Acc:628775]
RGD1359127	chr7	454	354	89.7602	106.957	-17.1969	0.839217	0.000889987	0.000889987	FDR<0.05	-0.240196	small	97.4676	112.304	82.6312	0.39549	-1.07978	0.735782	0.28024	0.999945	Not Sig	nonsignificant	.	.
LOC100359951	chr9	3807	2539	62.6295	66.667	-4.03758	0.939437	0.000896149	0.000896149	FDR<0.05	-0.0887935	negligible	1664.03	1630.04	1698.03	0.209136	0.286197	1.04171	0.774727	0.999945	Not Sig	nonsignificant	.	.	ribosomal protein S20-like [Source:RGD Symbol;Acc:2323094]
Chst12	chr12	365	291	81.7784	102.955	-21.1762	0.794315	0.000901491	0.000901491	FDR<0.05	-0.244882	small	67.7112	76.1446	59.2777	0.436593	-0.818063	0.778489	0.413321	0.999945	Not Sig	nonsignificant	.	.	carbohydrate sulfotransferase 12 [Source:RGD Symbol;Acc:1308214]
Rpa3	chr4	709	518	104.916	116.676	-11.7607	0.899202	0.00090154	0.00090154	FDR<0.05	-0.17638	negligible	134.856	138.806	130.905	0.324291	-0.274878	0.943084	0.78341	0.999945	Not Sig	nonsignificant	.	Y	replication protein A3 [Source:RGD Symbol;Acc:1306810]
Utp23	chr7	349	366	63.1083	77.1398	-14.0314	0.818104	0.000912871	0.000912871	FDR<0.05	-0.252965	small	93.0259	116.392	69.66	0.374061	-2.00129	0.598496	0.0453616	0.999945	Not Sig	nonsignificant	.	Y	UTP23, small subunit processome component [Source:RGD Symbol;Acc:1307179]
Asrgl1	chr1	3832	2543	88.1279	93.0786	-4.95064	0.946812	0.000915103	0.000915103	FDR<0.05	-0.0780927	negligible	776.504	783.054	769.954	0.219324	-0.11078	0.98327	0.911791	0.999945	Not Sig	nonsignificant	.	.	asparaginase and isoaspartyl peptidase 1 [Source:RGD Symbol;Acc:708526]
Chmp2a	chr1	4268	2850	77.7879	82.64	-4.85217	0.941285	0.000915424	0.000915424	FDR<0.05	-0.085164	negligible	857.803	831.13	884.476	0.216743	0.410928	1.06418	0.681125	0.999945	Not Sig	nonsignificant	.	.	charged multivesicular body protein 2A [Source:RGD Symbol;Acc:1305050]
Amz2	chr10	1395	952	108.963	122.16	-13.1967	0.891972	0.000923711	0.000923711	FDR<0.05	-0.147627	negligible	228.293	218.305	238.282	0.317011	0.369651	1.09151	0.711643	0.999945	Not Sig	nonsignificant	.	.	archaelysin family metallopeptidase 2 [Source:RGD Symbol;Acc:1304846]
Trnt1	chr4	664	484	86.2844	102.027	-15.7429	0.845699	0.000927617	0.000927617	FDR<0.05	-0.174929	negligible	112.771	109.873	115.668	0.385288	0.147513	1.05274	0.882727	0.999945	Not Sig	nonsignificant	.	.	tRNA nucleotidyl transferase 1 [Source:RGD Symbol;Acc:1308857]
Cby1	chr7	1957	1315	85.1176	94.3065	-9.1889	0.902564	0.000932408	0.000932408	FDR<0.05	-0.133215	negligible	396.637	406.781	386.494	0.244043	-0.309813	0.950128	0.756703	0.999945	Not Sig	nonsignificant	.	.
Hdac1	chr5	586	386	78.5113	92.9035	-14.3922	0.845084	0.000940519	0.000940519	FDR<0.05	-0.256343	small	117.769	115.711	119.826	0.352339	0.115978	1.03556	0.90767	0.999945	Not Sig	nonsignificant	.	.	histone deacetylase 1 [Source:RGD Symbol;Acc:1309799]
Sbf2	chr1	100	57	127.967	202.63	-74.6633	0.631528	0.000942039	0.000942039	FDR<0.05	-0.611729	medium	11.8731	10.5263	13.22	0.879247	0.361365	1.2559	0.717827	0.999945	Not Sig	nonsignificant	.	Y	SET binding factor 2 [Source:RGD Symbol;Acc:1588657]
Ssb	chr3	4068	2765	90.549	98.1145	-7.56544	0.922892	0.000961399	0.000961399	FDR<0.05	-0.0720593	negligible	860.543	846.895	874.192	0.218527	0.204417	1.03223	0.838028	0.999945	Not Sig	nonsignificant	.	.	small RNA binding exonuclease protection factor La [Source:RGD Symbol;Acc:620804]
Chd3	chr10	701	415	82.6936	100.355	-17.6612	0.824012	0.000962025	0.000962025	FDR<0.05	-0.172293	negligible	81.8924	80.2557	83.5292	0.396645	0.165208	1.04079	0.868781	0.999945	Not Sig	nonsignificant	.	.	chromodomain helicase DNA binding protein 3 [Source:RGD Symbol;Acc:1311923]
RGD1566325	chr1	874	727	110.33	125.88	-15.5498	0.87647	0.000969802	0.000969802	FDR<0.05	-0.17848	negligible	156.285	174.942	137.628	0.314975	-1.1252	0.786708	0.260505	0.999945	Not Sig	nonsignificant	.	Y	similar to regulator of sex-limitation candidate 16 [Source:RGD Symbol;Acc:1566325]
Sult4a1	chr7	4141	2532	98.6205	104.399	-5.77843	0.944651	0.000972853	0.000972853	FDR<0.05	-0.0613457	negligible	714.45	675.772	753.128	0.237083	0.667659	1.11447	0.504352	0.999945	Not Sig	nonsignificant	.	.	sulfotransferase family 4A, member 1 [Source:RGD Symbol;Acc:69292]
Snap47	chr10	1474	1063	95.6494	104.161	-8.51111	0.918289	0.000977296	0.000977296	FDR<0.05	-0.133009	negligible	322.796	341.11	304.483	0.264015	-0.632186	0.892625	0.527265	0.999945	Not Sig	nonsignificant	.	.	synaptosome associated protein 47 [Source:RGD Symbol;Acc:735194]
Gadd45b	chr7	938	58	139.044	114.877	24.1668	1.21037	0.000977975	0.000977975	FDR<0.05	0.394598	small	81.9842	13.5637	150.405	0.538989	6.42845	11.0887	1.2891e-10	1.15295e-07	FDR<0.05	upregulated	.	.	growth arrest and DNA-damage-inducible, beta [Source:RGD Symbol;Acc:1309080]
Ewsr1	chr14	435	248	112.075	136.766	-24.6908	0.819467	0.00098093	0.00098093	FDR<0.05	-0.252199	small	49.8759	46.3729	53.3789	0.473542	0.450341	1.15108	0.652464	0.999945	Not Sig	nonsignificant	.	.	EWS RNA-binding protein 1 [Source:RGD Symbol;Acc:1307258]
Cops2	chr3	1377	1048	73.8318	84.2989	-10.4671	0.875834	0.000985364	0.000985364	FDR<0.05	-0.117152	negligible	288.536	299.949	277.122	0.278403	-0.435296	0.923899	0.663348	0.999945	Not Sig	nonsignificant	.	.	COP9 signalosome subunit 2 [Source:RGD Symbol;Acc:628791]
Btf3l4	chr5	2199	1603	84.672	94.2978	-9.62576	0.897922	0.000990918	0.000990918	FDR<0.05	-0.0952832	negligible	362.939	375.411	350.467	0.251634	-0.400818	0.933557	0.688554	0.999945	Not Sig	nonsignificant	.	Y	basic transcription factor 3-like 4 [Source:RGD Symbol;Acc:1311774]
Rab3d	chr8	200	188	84.1948	106.827	-22.6324	0.78814	0.000994277	0.000994277	FDR<0.05	-0.346248	small	37.5541	41.9214	33.1869	0.525094	-0.625451	0.791646	0.531675	0.999945	Not Sig	nonsignificant	.	.	RAB3D, member RAS oncogene family [Source:RGD Symbol;Acc:620924]
Dpp6	chr4	2269	1305	88.149	96.8974	-8.74848	0.909714	0.0010016	0.0010016	FDR<0.05	-0.10438	negligible	290.897	280.046	301.747	0.260272	0.405911	1.07749	0.684808	0.999945	Not Sig	nonsignificant	.	.	dipeptidyl peptidase like 6 [Source:RGD Symbol;Acc:68402]
Folh1	chr1	152	74	116.099	88.4157	27.6833	1.3131	0.00101772	0.00101772	FDR<0.05	0.47389	small	21.2366	16.1826	26.2907	0.702178	0.932966	1.62463	0.350837	0.999945	Not Sig	nonsignificant	.	.	folate hydrolase 1 [Source:RGD Symbol;Acc:70963]
RGD1309540	chr3	3636	2548	106.045	113.681	-7.63517	0.932837	0.00102208	0.00102208	FDR<0.05	-0.0866579	negligible	741.968	741.373	742.562	0.23454	-0.00259247	1.0016	0.997932	0.999945	Not Sig	nonsignificant	.	.
Bex1	chrX	2760	1801	85.0187	93.0445	-8.02574	0.913743	0.00102574	0.00102574	FDR<0.05	-0.108766	negligible	553.629	558.334	548.923	0.237402	-0.0934699	0.983144	0.92553	0.999945	Not Sig	nonsignificant	.	.	brain expressed X-linked 1 [Source:RGD Symbol;Acc:1564466]
Erg28	chr6	2312	1630	104.201	112.636	-8.43473	0.925115	0.00103028	0.00103028	FDR<0.05	-0.0963492	negligible	496.971	503.53	490.413	0.236078	-0.151577	0.97395	0.879521	0.999945	Not Sig	nonsignificant	Y	Y	ergosterol biosynthesis 28 homolog [Source:RGD Symbol;Acc:1310769]
Nfx1	chr5	772	505	84.5711	102.019	-17.4475	0.828977	0.00103479	0.00103479	FDR<0.05	-0.165955	negligible	124.797	117.047	132.548	0.359798	0.463875	1.13243	0.642737	0.999945	Not Sig	nonsignificant	.	.	nuclear transcription factor, X-box binding 1 [Source:RGD Symbol;Acc:1310277]
Thap7	chr11	760	515	90.4902	104.141	-13.651	0.868918	0.00103595	0.00103595	FDR<0.05	-0.213757	small	130.449	139.353	121.545	0.339526	-0.546704	0.872208	0.584582	0.999945	Not Sig	nonsignificant	.	.	THAP domain containing 7 [Source:RGD Symbol;Acc:1308061]
Klhdc3	chr9	1953	1235	86.928	96.1861	-9.2581	0.903748	0.00104046	0.00104046	FDR<0.05	-0.127448	negligible	370.284	359.25	381.318	0.27504	0.339116	1.06143	0.734523	0.999945	Not Sig	nonsignificant	.	.	kelch domain containing 3 [Source:RGD Symbol;Acc:1307105]
Scn2b	chr8	2088	1402	112.889	121.324	-8.4355	0.930471	0.00105039	0.00105039	FDR<0.05	-0.110019	negligible	191.37	185.312	197.429	0.30807	0.261778	1.06539	0.793493	0.999945	Not Sig	nonsignificant	.	.	sodium voltage-gated channel beta subunit 2 [Source:RGD Symbol;Acc:3633]
Rcan1	chr11	296	194	91.0623	111.023	-19.9608	0.82021	0.00105768	0.00105768	FDR<0.05	-0.290955	small	38.904	41.1097	36.6982	0.533844	-0.28275	0.892691	0.777368	0.999945	Not Sig	nonsignificant	.	.	regulator of calcineurin 1 [Source:RGD Symbol;Acc:631338]
Dpysl4	chr1	864	534	107.972	122.993	-15.0201	0.877878	0.0010596	0.0010596	FDR<0.05	-0.1762	negligible	164.541	166.011	163.071	0.307919	-0.0919905	0.982291	0.926706	0.999945	Not Sig	nonsignificant	.	.	dihydropyrimidinase-like 4 [Source:RGD Symbol;Acc:2409]
Borcs7	chr1	1068	713	81.3544	92.4625	-11.1081	0.879864	0.00105963	0.00105963	FDR<0.05	-0.14374	negligible	131.475	129.406	133.544	0.336492	0.107094	1.03198	0.914714	0.999945	Not Sig	nonsignificant	.	.	BLOC-1 related complex subunit 7 [Source:RGD Symbol;Acc:1311783]
Cox6a1	chr12	21390	13509	86.7146	89.1627	-2.44812	0.972543	0.00106023	0.00106023	FDR<0.05	-0.0377162	negligible	4022.34	3935.84	4108.85	0.204186	0.305919	1.04396	0.759666	0.999945	Not Sig	nonsignificant	.	.	cytochrome c oxidase subunit 6A1 [Source:RGD Symbol;Acc:2384]
Fbxo7	chr7	679	295	82.5018	99.4726	-16.9709	0.829392	0.00106153	0.00106153	FDR<0.05	-0.294857	small	114.963	92.7437	137.182	0.421246	1.4014	1.47915	0.161094	0.999945	Not Sig	nonsignificant	.	.	F-box protein 7 [Source:RGD Symbol;Acc:1305648]
LOC108351255	chr6	879	655	63.2486	72.477	-9.22836	0.872672	0.00106235	0.00106235	FDR<0.05	-0.173765	negligible	215.696	216.783	214.608	0.278233	-0.0476143	0.989969	0.962024	0.999945	Not Sig	nonsignificant	.	.	60S ribosomal protein L35a pseudogene [Source:RGD Symbol;Acc:11360540]
Shoc2	chr1	360	230	75.7114	95.6576	-19.9462	0.791483	0.00106747	0.00106747	FDR<0.05	-0.283389	small	54.5274	56.3242	52.7306	0.462381	-0.247418	0.936198	0.804585	0.999945	Not Sig	nonsignificant	Y	.	SHOC2 leucine-rich repeat scaffold protein [Source:RGD Symbol;Acc:1308146]
ND4	chrM	52706	37951	52.0976	52.35	-0.252378	0.995179	0.00106883	0.00106883	FDR<0.05	-0.0076868	negligible	4447.33	4698.89	4195.78	0.200938	-0.81435	0.892931	0.415444	0.999945	Not Sig	nonsignificant	.	.	mitochondrially encoded NADH:ubiquinone oxidoreductase core subunit 4 [Source:RGD Symbol;Acc:620559]
Dnajc7	chr10	3198	2174	77.6422	83.9916	-6.34944	0.924404	0.00107199	0.00107199	FDR<0.05	-0.0737076	negligible	669.599	665.25	673.949	0.225185	0.0785823	1.01308	0.937365	0.999945	Not Sig	nonsignificant	.	.	DnaJ heat shock protein family (Hsp40) member C7 [Source:RGD Symbol;Acc:1303226]
Slc39a9	chr6	228	152	102.661	126.977	-24.3163	0.808499	0.00107199	0.00107199	FDR<0.05	-0.303753	small	20.4178	20.8434	19.9922	0.695373	-0.112098	0.959166	0.910745	0.999945	Not Sig	nonsignificant	.	.	solute carrier family 39, member 9 [Source:RGD Symbol;Acc:1311236]
Cdh13	chr19	550	299	78.0778	93.4097	-15.3319	0.835864	0.00107243	0.00107243	FDR<0.05	-0.248181	small	130.108	128.514	131.702	0.328587	0.117741	1.02481	0.906273	0.999945	Not Sig	nonsignificant	.	Y	cadherin 13 [Source:RGD Symbol;Acc:619745]
Dcaf5	chr6	229	160	72.0911	95.7514	-23.6603	0.752899	0.00107636	0.00107636	FDR<0.05	-0.298035	small	13.4665	10.5263	16.4067	0.834844	0.753495	1.55864	0.451152	0.999945	Not Sig	nonsignificant	.	Y	DDB1 and CUL4 associated factor 5 [Source:RGD Symbol;Acc:1306535]
LOC685668	chr9	1724	1210	104.122	111.94	-7.81828	0.930157	0.00108492	0.00108492	FDR<0.05	-0.131049	negligible	181.109	191.75	170.468	0.302053	-0.54998	0.889014	0.582333	0.999945	Not Sig	nonsignificant	.	.
Pitpna	chr10	1036	543	120.177	108.544	11.6332	1.10717	0.00109503	0.00109503	FDR<0.05	0.17798	negligible	99.6439	106.098	93.1898	0.427711	-0.392973	0.878335	0.69434	0.999945	Not Sig	nonsignificant	.	.	phosphatidylinositol transfer protein, alpha [Source:RGD Symbol;Acc:61885]
Ctsl	chr17	3504	2288	85.9526	92.2689	-6.3163	0.931545	0.00109994	0.00109994	FDR<0.05	-0.0861221	negligible	691.581	679.363	703.799	0.225885	0.221638	1.03597	0.824596	0.999945	Not Sig	nonsignificant	.	.	cathepsin L [Source:RGD Symbol;Acc:2448]
Hnrnpk	chr17	8285	5431	114.537	118.262	-3.72481	0.968504	0.00110141	0.00110141	FDR<0.05	-0.0597845	negligible	1315.43	1268.92	1361.94	0.229135	0.435913	1.0733	0.6629	0.999945	Not Sig	nonsignificant	.	Y	heterogeneous nuclear ribonucleoprotein K [Source:RGD Symbol;Acc:71058]
Serp1	chr2	769	270	118.878	104.485	14.3935	1.13776	0.00110146	0.00110146	FDR<0.05	0.211381	small	47.166	28.2794	66.0526	0.554618	2.21949	2.33571	0.0264536	0.999945	Not Sig	nonsignificant	Y	Y	stress-associated endoplasmic reticulum protein 1 [Source:RGD Symbol;Acc:620790]
Chmp5	chr5	5273	3411	102.637	107.168	-4.53077	0.957723	0.00111478	0.00111478	FDR<0.05	-0.0838477	negligible	1065.35	1036.6	1094.1	0.218361	0.350292	1.05547	0.726119	0.999945	Not Sig	nonsignificant	.	.	charged multivesicular body protein 5 [Source:RGD Symbol;Acc:1305968]
Xpr1	chr13	429	267	81.16	102.952	-21.7918	0.78833	0.00112329	0.00112329	FDR<0.05	-0.221785	small	18.6816	18.0934	19.2697	0.719539	0.146308	1.06501	0.883678	0.999945	Not Sig	nonsignificant	Y	Y	xenotropic and polytropic retrovirus receptor 1 [Source:RGD Symbol;Acc:1306554]
Msantd4	chr8	448	386	79.8298	96.3315	-16.5017	0.828699	0.00112407	0.00112407	FDR<0.05	-0.210736	small	92.4512	104.164	80.7386	0.389382	-0.975709	0.77511	0.329209	0.999945	Not Sig	nonsignificant	.	Y	Myb/SANT DNA binding domain containing 4 with coiled-coils [Source:RGD Symbol;Acc:1565380]
Stip1	chr1	3414	2399	90.8642	96.9615	-6.09729	0.937116	0.00112468	0.00112468	FDR<0.05	-0.0737057	negligible	754.329	783.87	724.788	0.226489	-0.50835	0.924628	0.611208	0.999945	Not Sig	nonsignificant	.	.	stress-induced phosphoprotein 1 [Source:RGD Symbol;Acc:621599]
Timm10b	chr1	1420	990	104.177	115.217	-11.0403	0.904178	0.00112908	0.00112908	FDR<0.05	-0.152871	negligible	236.272	238.019	234.525	0.271755	-0.0831543	0.985321	0.933729	0.999945	Not Sig	nonsignificant	.	Y	translocase of inner mitochondrial membrane 10B [Source:RGD Symbol;Acc:71097]
Clip3	chr1	3607	2349	100.574	107.177	-6.60319	0.93839	0.00112979	0.00112979	FDR<0.05	-0.0921825	negligible	321.444	332.179	310.708	0.255463	-0.377984	0.935363	0.705442	0.999945	Not Sig	nonsignificant	.	.	CAP-GLY domain containing linker protein 3 [Source:RGD Symbol;Acc:1306245]
Acyp1	chr6	1395	954	112.336	122.514	-10.1784	0.916921	0.00113279	0.00113279	FDR<0.05	-0.112397	negligible	267.92	263.471	272.369	0.262944	0.181542	1.03377	0.855942	0.999945	Not Sig	nonsignificant	.	.	acylphosphatase 1 [Source:RGD Symbol;Acc:1311327]
Serbp1	chr4	887	567	92.1411	104.732	-12.5911	0.879778	0.00113642	0.00113642	FDR<0.05	-0.172904	negligible	67.1462	61.2196	73.0727	0.435874	0.603865	1.19362	0.545933	0.999945	Not Sig	nonsignificant	Y	Y	Serpine1 mRNA binding protein 1 [Source:RGD Symbol;Acc:619907]
Slc35c2	chr3	646	446	105.338	119.412	-14.074	0.882139	0.00113927	0.00113927	FDR<0.05	-0.175403	negligible	126.275	131.029	121.521	0.331294	-0.349003	0.927431	0.727087	0.999945	Not Sig	nonsignificant	Y	.	solute carrier family 35 member C2 [Source:RGD Symbol;Acc:1311250]
Mrps6	chr11	4477	3051	98.8884	104.277	-5.38874	0.948323	0.00114062	0.00114062	FDR<0.05	-0.0630253	negligible	866.566	881.245	851.887	0.216598	-0.222312	0.966686	0.824071	0.999945	Not Sig	nonsignificant	.	.	mitochondrial ribosomal protein S6 [Source:RGD Symbol;Acc:2322928]
Acat1	chr8	3041	1999	99.7445	107.22	-7.47533	0.93028	0.00115008	0.00115008	FDR<0.05	-0.101407	negligible	538.653	513.276	564.03	0.239008	0.555478	1.09888	0.578568	0.999945	Not Sig	nonsignificant	.	.	acetyl-CoA acetyltransferase 1 [Source:RGD Symbol;Acc:2016]
Slc30a3	chr6	1918	910	85.2261	95.8574	-10.6312	0.889093	0.0011567	0.0011567	FDR<0.05	-0.116691	negligible	304.834	269.252	340.417	0.340786	1.02367	1.26431	0.30599	0.999945	Not Sig	nonsignificant	.	.	solute carrier family 30 member 3 [Source:RGD Symbol;Acc:1359689]
RGD1359634	chr7	576	413	106.098	124.286	-18.1883	0.853658	0.00116059	0.00116059	FDR<0.05	-0.206227	small	114.233	116.679	111.786	0.335969	-0.189209	0.95806	0.849929	0.999945	Not Sig	nonsignificant	.	.	similar to RIKEN cDNA 1700088E04 [Source:RGD Symbol;Acc:1359634]
Gng3	chr1	9182	7738	96.3264	99.3544	-3.02796	0.969524	0.00116253	0.00116253	FDR<0.05	-0.0523762	negligible	1808.92	1998.65	1619.18	0.203789	-1.49116	0.810133	0.135919	0.999945	Not Sig	nonsignificant	.	.	G protein subunit gamma 3 [Source:RGD Symbol;Acc:620805]
Oip5-as1	chr3	1154	689	104.094	119.533	-15.4388	0.870841	0.00117112	0.00117112	FDR<0.05	-0.137733	negligible	8.43572	8.43161	8.43983	1.03513	-0.0252665	1.00097	0.979842	0.999945	Not Sig	nonsignificant	.	.
Lrrcc1	chr2	216	135	89.9238	117.74	-27.8158	0.763752	0.00117486	0.00117486	FDR<0.05	-0.305478	small	18.9765	18.4337	19.5193	0.728216	0.151129	1.05889	0.879874	0.999945	Not Sig	nonsignificant	.	Y	leucine rich repeat and coiled-coil centrosomal protein 1 [Source:RGD Symbol;Acc:628722]
Rab28	chr14	1321	823	87.7538	99.6006	-11.8468	0.881057	0.00119133	0.00119133	FDR<0.05	-0.131708	negligible	255.912	243.936	267.888	0.269125	0.516222	1.09819	0.6057	0.999945	Not Sig	nonsignificant	.	.	RAB28, member RAS oncogene family [Source:RGD Symbol;Acc:620891]
Nsf	chr10	5042	3444	110.515	117.432	-6.91688	0.941099	0.00119203	0.00119203	FDR<0.05	-0.0714135	negligible	923.606	919.215	927.996	0.214636	0.0622308	1.00955	0.950379	0.999945	Not Sig	nonsignificant	.	.	N-ethylmaleimide sensitive factor, vesicle fusing ATPase [Source:RGD Symbol;Acc:621594]
LOC102555331	chrX	702	403	94.2941	107.708	-13.4142	0.875458	0.00119255	0.00119255	FDR<0.05	-0.207018	small	9.08393	10.9977	7.17019	0.989042	-0.636083	0.651974	0.524722	0.999945	Not Sig	nonsignificant	.	.
Mrpl10	chr10	1126	870	87.4353	95.7763	-8.34099	0.912912	0.00120424	0.00120424	FDR<0.05	-0.11054	negligible	230.822	248.73	212.915	0.274537	-0.828025	0.856012	0.407656	0.999945	Not Sig	nonsignificant	.	.	mitochondrial ribosomal protein L10 [Source:RGD Symbol;Acc:1588626]
Kcnip3	chr3	275	174	89.9794	112.576	-22.5965	0.799277	0.00121114	0.00121114	FDR<0.05	-0.319996	small	31.5298	30.2959	32.7637	0.563533	0.181796	1.08146	0.855743	0.999945	Not Sig	nonsignificant	.	.	potassium voltage-gated channel interacting protein 3 [Source:RGD Symbol;Acc:70888]
Exoc7	chr10	576	384	85.8382	103.001	-17.1632	0.833369	0.00121384	0.00121384	FDR<0.05	-0.184029	negligible	101.561	89.3954	113.726	0.368878	0.910076	1.27217	0.362783	0.999945	Not Sig	nonsignificant	.	.	exocyst complex component 7 [Source:RGD Symbol;Acc:620236]
Sqle	chr7	1340	713	115.95	104.85	11.0993	1.10586	0.00121414	0.00121414	FDR<0.05	0.132376	negligible	233.186	223.8	242.571	0.300152	0.395552	1.08387	0.692435	0.999945	Not Sig	nonsignificant	.	.	squalene epoxidase [Source:RGD Symbol;Acc:3755]
Hpcal4	chr5	2145	1307	115.877	124	-8.12347	0.934488	0.0012144	0.0012144	FDR<0.05	-0.110337	negligible	166.05	162.555	169.545	0.30209	0.186045	1.043	0.85241	0.999945	Not Sig	nonsignificant	.	Y	hippocalcin-like 4 [Source:RGD Symbol;Acc:708491]
Pwwp2b	chr1	191	175	76.3787	93.1191	-16.7404	0.820226	0.00121725	0.00121725	FDR<0.05	-0.366414	small	39.7353	45.5612	33.9094	0.508408	-0.823106	0.744261	0.410447	0.999945	Not Sig	nonsignificant	.	.	PWWP domain containing 2B [Source:RGD Symbol;Acc:1307108]
Nfat5	chr19	304	174	101.268	131.304	-30.0356	0.771252	0.00121825	0.00121825	FDR<0.05	-0.317672	small	24.1994	23.2784	25.1205	0.63085	0.156991	1.07914	0.875252	0.999945	Not Sig	nonsignificant	Y	Y	nuclear factor of activated T-cells 5 [Source:RGD Symbol;Acc:1309142]
Ripor1	chr19	414	268	90.8919	108.802	-17.9105	0.835385	0.00121865	0.00121865	FDR<0.05	-0.222438	small	82.2948	81.9827	82.6068	0.41066	0.0770302	1.00761	0.9386	0.999945	Not Sig	nonsignificant	.	Y	RHO family interacting cell polarization regulator 1 [Source:RGD Symbol;Acc:1307772]
Borcs8	chr16	1422	1035	111.731	122.543	-10.8122	0.911768	0.00121917	0.00121917	FDR<0.05	-0.129334	negligible	36.527	37.6009	35.453	0.531104	-0.134869	0.942876	0.892715	0.999945	Not Sig	nonsignificant	.	.	BLOC-1 related complex subunit 8 [Source:RGD Symbol;Acc:1582941]
Rps12	chr1	6034	3707	67.2563	70.6784	-3.42215	0.951581	0.00123321	0.00123321	FDR<0.05	-0.063887	negligible	398.262	377.713	418.812	0.246232	0.617	1.10881	0.537235	0.999945	Not Sig	nonsignificant	.	.	ribosomal protein S12 [Source:RGD Symbol;Acc:62024]
Nme3	chr10	2299	1494	85.5787	93.002	-7.42339	0.92018	0.00123757	0.00123757	FDR<0.05	-0.100022	negligible	432.853	438.827	426.88	0.252027	-0.142874	0.972775	0.88639	0.999945	Not Sig	nonsignificant	.	.	NME/NM23 nucleoside diphosphate kinase 3 [Source:RGD Symbol;Acc:619879]
Ppm1d	chr10	226	74	114.063	79.5042	34.559	1.43468	0.00124431	0.00124431	FDR<0.05	0.433372	small	23.3552	17.2818	29.4286	0.69397	1.13392	1.70287	0.25683	0.999945	Not Sig	nonsignificant	.	.	protein phosphatase, Mg2+/Mn2+ dependent, 1D [Source:RGD Symbol;Acc:1305460]
Eif6	chr3	2187	1444	88.087	94.5981	-6.51113	0.931171	0.00124462	0.00124462	FDR<0.05	-0.132591	negligible	428.481	424.954	432.007	0.246758	0.0837591	1.0166	0.933248	0.999945	Not Sig	nonsignificant	.	.	eukaryotic translation initiation factor 6 [Source:RGD Symbol;Acc:1305373]
Etv5	chr11	411	163	118.329	101.367	16.9626	1.16734	0.00124513	0.00124513	FDR<0.05	0.275992	small	26.0232	16.9414	35.1049	0.646144	1.64243	2.07213	0.1005	0.999945	Not Sig	nonsignificant	.	Y	ETS variant transcription factor 5 [Source:RGD Symbol;Acc:1309590]
Mmadhc	chr3	915	691	96.0484	111.408	-15.3596	0.862132	0.00125072	0.00125072	FDR<0.05	-0.139249	negligible	195.266	202.067	188.465	0.303528	-0.332521	0.932685	0.739496	0.999945	Not Sig	nonsignificant	.	.	metabolism of cobalamin associated D [Source:RGD Symbol;Acc:1303272]
Txndc12	chr5	1152	836	85.9486	96.5283	-10.5797	0.890398	0.00125765	0.00125765	FDR<0.05	-0.120378	negligible	234.233	240.089	228.377	0.275103	-0.272917	0.95122	0.784917	0.999945	Not Sig	nonsignificant	.	Y	thioredoxin domain containing 12 [Source:RGD Symbol;Acc:1305960]
Ndufaf8	chr10	2306	1432	74.1893	79.3357	-5.14641	0.935131	0.00126552	0.00126552	FDR<0.05	-0.116492	negligible	362.004	340.922	383.086	0.268121	0.651138	1.12368	0.514958	0.999945	Not Sig	nonsignificant	.	.
Tsen34	chr1	426	300	92.1726	110.092	-17.9197	0.837231	0.00126772	0.00126772	FDR<0.05	-0.266514	small	77.2561	79.5477	74.9645	0.42656	-0.152771	0.942385	0.878579	0.999945	Not Sig	nonsignificant	.	.	tRNA splicing endonuclease subunit 34 [Source:RGD Symbol;Acc:1359564]
Cd59	chr3	3383	2243	93.2458	99.5445	-6.2987	0.936725	0.00126949	0.00126949	FDR<0.05	-0.0759091	negligible	680.197	670.934	689.459	0.227753	0.16368	1.02761	0.869983	0.999945	Not Sig	nonsignificant	.	.	CD59 molecule [Source:RGD Symbol;Acc:2311]
Camkk1	chr10	1254	816	123.084	136.255	-13.1718	0.90333	0.0012711	0.0012711	FDR<0.05	-0.134341	negligible	158.642	161.008	156.276	0.314504	-0.107554	0.970611	0.91435	0.999945	Not Sig	nonsignificant	Y	.	calcium/calmodulin-dependent protein kinase kinase 1 [Source:RGD Symbol;Acc:62023]
Cct8	chr11	3663	2468	97.0596	103.975	-6.91578	0.933486	0.0012712	0.0012712	FDR<0.05	-0.0739692	negligible	681.726	682.511	680.941	0.249247	-0.0271872	0.9977	0.97831	0.999945	Not Sig	nonsignificant	.	Y	chaperonin containing TCP1 subunit 8 [Source:RGD Symbol;Acc:1305452]
Prpsap2	chr10	1387	909	95.2644	105.575	-10.3104	0.902341	0.00127359	0.00127359	FDR<0.05	-0.12025	negligible	279.082	279.994	278.17	0.260599	-0.0402612	0.993486	0.967885	0.999945	Not Sig	nonsignificant	.	.	phosphoribosyl pyrophosphate synthetase-associated protein 2 [Source:RGD Symbol;Acc:620207]
Rgs7	chr13	395	263	85.4788	108.794	-23.3152	0.785694	0.00128266	0.00128266	FDR<0.05	-0.262537	small	86.65	90.4925	82.8075	0.431296	-0.250341	0.915076	0.802323	0.999945	Not Sig	nonsignificant	.	.	regulator of G-protein signaling 7 [Source:RGD Symbol;Acc:3570]
Rpl27-l1	chrX	2639	1738	60.0101	65.2035	-5.19339	0.920351	0.00129196	0.00129196	FDR<0.05	-0.0940396	negligible	500.21	502.118	498.303	0.235917	-0.0467432	0.992403	0.962718	0.999945	Not Sig	nonsignificant	.	.	ribosomal protein L27-like 1 [Source:RGD Symbol;Acc:1585224]
Cct3	chr2	3720	2528	85.8043	93.2283	-7.42398	0.920368	0.00129421	0.00129421	FDR<0.05	-0.0858245	negligible	733.482	732.441	734.522	0.223088	0.0124191	1.00284	0.990091	0.999945	Not Sig	nonsignificant	.	.	chaperonin containing TCP1 subunit 3 [Source:RGD Symbol;Acc:735038]
Rasgef1b	chr14	73	51	114.952	76.5439	38.4085	1.50178	0.00129476	0.00129476	FDR<0.05	0.548531	medium	9.23314	10.9977	7.46862	1.07144	-0.541132	0.679109	0.588417	0.999945	Not Sig	nonsignificant	.	.	RasGEF domain family, member 1B [Source:RGD Symbol;Acc:1562220]
Hnrnpa1	chr7	8605	5560	95.9896	100.475	-4.48497	0.955362	0.00130035	0.00130035	FDR<0.05	-0.0617491	negligible	1653.4	1648.89	1657.91	0.21208	0.0316753	1.00547	0.974731	0.999945	Not Sig	nonsignificant	.	.	heterogeneous nuclear ribonucleoprotein A1 [Source:RGD Symbol;Acc:69234]
Spint2	chr1	506	223	90.7506	106.443	-15.6927	0.852572	0.00131854	0.00131854	FDR<0.05	-0.305459	small	75.1148	57.7362	92.4934	0.484514	1.44892	1.602	0.14736	0.999945	Not Sig	nonsignificant	.	.	serine peptidase inhibitor, Kunitz type, 2 [Source:RGD Symbol;Acc:735123]
Tars3	chr1	129	87	86.807	124.487	-37.6805	0.697315	0.0013279	0.0013279	FDR<0.05	-0.477498	small	18.1707	19.5857	16.7557	0.754687	-0.252732	0.855508	0.800476	0.999945	Not Sig	nonsignificant	.	.	threonyl-tRNA synthetase 3 [Source:RGD Symbol;Acc:1311308]
Xrcc6	chr7	459	212	119.108	95.5156	23.5922	1.247	0.00132974	0.00132974	FDR<0.05	0.222276	small	68.2746	55.4851	81.064	0.418249	1.33073	1.46101	0.183279	0.999945	Not Sig	nonsignificant	.	.	X-ray repair cross complementing 6 [Source:RGD Symbol;Acc:2643]
Elavl2	chr5	577	378	97.1183	113.792	-16.6739	0.853471	0.0013334	0.0013334	FDR<0.05	-0.20231	small	61.8121	55.931	67.6931	0.4369	0.599675	1.2103	0.548723	0.999945	Not Sig	nonsignificant	.	Y	ELAV like RNA binding protein 2 [Source:RGD Symbol;Acc:628611]
Nsun3	chr11	77	61	109.225	191.243	-82.018	0.571132	0.00134177	0.00134177	FDR<0.05	-0.561645	medium	9.922	13.6948	6.14924	1.00171	-1.17821	0.449021	0.238713	0.999945	Not Sig	nonsignificant	Y	Y	NOP2/Sun RNA methyltransferase 3 [Source:RGD Symbol;Acc:2322119]
Mat2b	chr10	2067	1402	90.9147	100.149	-9.2343	0.907794	0.00134202	0.00134202	FDR<0.05	-0.0931131	negligible	419.751	430.923	408.578	0.241917	-0.326774	0.948144	0.743839	0.999945	Not Sig	nonsignificant	.	Y	methionine adenosyltransferase 2B [Source:RGD Symbol;Acc:1593534]
Tfg	chr11	247	166	98.5261	130.064	-31.5375	0.757522	0.00135188	0.00135188	FDR<0.05	-0.236203	small	37.12	38.438	35.8021	0.601912	-0.111033	0.931424	0.91159	0.999945	Not Sig	nonsignificant	.	.	trafficking from ER to golgi regulator [Source:RGD Symbol;Acc:1309751]
Naga	chr7	514	411	97.7864	114.79	-17.0032	0.851875	0.00135194	0.00135194	FDR<0.05	-0.165759	negligible	111.567	123.225	99.9088	0.35474	-0.863708	0.81078	0.387748	0.999945	Not Sig	nonsignificant	.	.	alpha-N-acetylgalactosaminidase [Source:RGD Symbol;Acc:1306025]
Oard1	chr9	236	197	80.0414	102.572	-22.5306	0.780344	0.00135733	0.00135733	FDR<0.05	-0.239686	small	39.9394	45.7451	34.1337	0.516784	-0.829307	0.746171	0.40693	0.999945	Not Sig	nonsignificant	.	Y	O-acyl-ADP-ribose deacylase 1 [Source:RGD Symbol;Acc:1308299]
Disp2	chr3	1413	994	111.893	122.694	-10.8011	0.911967	0.00136169	0.00136169	FDR<0.05	-0.119326	negligible	91.1593	83.0311	99.2875	0.369736	0.723804	1.19579	0.469186	0.999945	Not Sig	nonsignificant	.	.	dispatched RND transporter family member 2 [Source:RGD Symbol;Acc:1309569]
Nap1l1	chr7	1686	1197	100.257	111.41	-11.1536	0.899887	0.00137351	0.00137351	FDR<0.05	-0.125158	negligible	302.843	313.299	292.386	0.256672	-0.381674	0.933248	0.702703	0.999945	Not Sig	nonsignificant	.	Y	nucleosome assembly protein 1-like 1 [Source:RGD Symbol;Acc:71094]
Snx2	chr18	1571	1105	93.2173	103.303	-10.0854	0.90237	0.00137443	0.00137443	FDR<0.05	-0.132048	negligible	322.871	328.962	316.781	0.286953	-0.211904	0.96297	0.832182	0.999945	Not Sig	nonsignificant	.	.	sorting nexin 2 [Source:RGD Symbol;Acc:1310291]
Mtm1	chr6	182	136	93.2997	71.3621	21.9376	1.30741	0.00137797	0.00137797	FDR<0.05	0.365304	small	35.9343	42.8641	29.0045	0.529175	-1.04983	0.676662	0.293795	0.999945	Not Sig	nonsignificant	.	Y	myotubularin 1 [Source:RGD Symbol;Acc:1304582]
Pgbd5	chr19	353	257	74.4673	94.2201	-19.7527	0.790355	0.0013964	0.0013964	FDR<0.05	-0.277007	small	21.2354	24.2211	18.2496	0.696908	-0.592963	0.753461	0.553206	0.999945	Not Sig	nonsignificant	.	Y	piggyBac transposable element derived 5 [Source:RGD Symbol;Acc:1310825]
LOC100911432	chr3	145	102	104.356	148.005	-43.6489	0.705086	0.00139707	0.00139707	FDR<0.05	-0.371345	small	27.5713	26.2376	28.905	0.607293	0.189684	1.10167	0.849556	0.999945	Not Sig	nonsignificant	.	.
Sema5a	chr2	750	422	91.4082	107.562	-16.1535	0.849821	0.0014061	0.0014061	FDR<0.05	-0.202054	small	49.4223	41.1097	57.735	0.468288	1.06858	1.40441	0.285259	0.999945	Not Sig	nonsignificant	.	Y	semaphorin 5A [Source:RGD Symbol;Acc:1308650]
Katnb1	chr19	727	490	103.761	120.003	-16.2424	0.86465	0.00141256	0.00141256	FDR<0.05	-0.19228	negligible	150.56	147.184	153.935	0.308459	0.20422	1.04587	0.838182	0.999945	Not Sig	nonsignificant	.	.	katanin regulatory subunit B1 [Source:RGD Symbol;Acc:1311256]
Eif3f	chr1	951	604	80.2227	90.8876	-10.6649	0.882659	0.00141641	0.00141641	FDR<0.05	-0.166882	negligible	142.385	144.8	139.97	0.33268	-0.12005	0.966642	0.904444	0.999945	Not Sig	nonsignificant	.	Y	eukaryotic translation initiation factor 3, subunit F [Source:RGD Symbol;Acc:1306112]
Riok3	chr18	700	365	92.7292	109.395	-16.6662	0.847652	0.00142311	0.00142311	FDR<0.05	-0.200287	small	112.37	102.198	122.542	0.344769	0.783919	1.19906	0.433088	0.999945	Not Sig	nonsignificant	.	Y	RIO kinase 3 [Source:RGD Symbol;Acc:1310833]
Tmem254	chr16	1097	696	91.2095	102.363	-11.1534	0.89104	0.00143243	0.00143243	FDR<0.05	-0.134885	negligible	209.8	192.667	226.933	0.280909	0.836425	1.17785	0.402916	0.999945	Not Sig	nonsignificant	.	.	transmembrane protein 254 [Source:RGD Symbol;Acc:1305689]
R3hdm4	chr7	2044	1244	105.137	113.216	-8.07844	0.928646	0.00143654	0.00143654	FDR<0.05	-0.116772	negligible	334.588	331.103	338.073	0.265088	0.13242	1.02105	0.894652	0.999945	Not Sig	nonsignificant	.	.	R3H domain containing 4 [Source:RGD Symbol;Acc:1307067]
Slc35b1	chr10	3391	2287	91.8269	98.65	-6.82314	0.930835	0.00144449	0.00144449	FDR<0.05	-0.0712847	negligible	666.598	672.69	660.505	0.233852	-0.125739	0.981886	0.899939	0.999945	Not Sig	nonsignificant	.	Y	solute carrier family 35, member B1 [Source:RGD Symbol;Acc:727783]
Pcdhb9	chr18	129	84	80.2927	109.437	-29.1443	0.733689	0.00144808	0.00144808	FDR<0.05	-0.412881	small	20.9737	19.1672	22.7802	0.674267	0.369501	1.1885	0.711754	0.999945	Not Sig	nonsignificant	.	.	protocadherin beta 9 [Source:RGD Symbol;Acc:1596840]
Dnajc12	chr20	747	583	85.974	98.3916	-12.4176	0.873794	0.00146441	0.00146441	FDR<0.05	-0.174046	negligible	161.048	173.266	148.831	0.308978	-0.732734	0.858978	0.46372	0.999945	Not Sig	nonsignificant	.	Y	DnaJ heat shock protein family (Hsp40) member C12 [Source:RGD Symbol;Acc:1591898]
Pnma8a	chr1	311	276	75.3996	91.5982	-16.1986	0.823156	0.00146543	0.00146543	FDR<0.05	-0.20489	small	56.4871	62.6337	50.3405	0.440481	-0.712681	0.803729	0.476043	0.999945	Not Sig	nonsignificant	.	.	PNMA family member 8A [Source:RGD Symbol;Acc:1310803]
Tamm41	chr4	361	256	89.0756	108.77	-19.6948	0.818932	0.00147483	0.00147483	FDR<0.05	-0.176626	negligible	59.1547	61.7438	56.5657	0.439045	-0.292637	0.916136	0.7698	0.999945	Not Sig	nonsignificant	.	.	TAM41 mitochondrial translocator assembly and maintenance homolog [Source:RGD Symbol;Acc:1586150]
Ndufa1	chrX	15506	9946	78.6787	81.2972	-2.61851	0.967791	0.001481	0.001481	FDR<0.05	-0.0452515	negligible	2841.8	2803.64	2879.97	0.201717	0.194177	1.02722	0.846038	0.999945	Not Sig	nonsignificant	.	.	NADH:ubiquinone oxidoreductase subunit A1 [Source:RGD Symbol;Acc:1560955]
Parl	chr11	1067	811	80.3457	89.8038	-9.45809	0.89468	0.00148449	0.00148449	FDR<0.05	-0.165366	negligible	221.192	218.068	224.317	0.289056	0.11835	1.02866	0.905791	0.999945	Not Sig	nonsignificant	.	.	presenilin associated, rhomboid-like [Source:RGD Symbol;Acc:1306191]
Tmem14a	chr9	3483	2444	95.7618	102.948	-7.18626	0.930195	0.00148478	0.00148478	FDR<0.05	-0.0997962	negligible	703.167	711.572	694.762	0.225928	-0.160051	0.976376	0.872841	0.999945	Not Sig	nonsignificant	.	.	transmembrane protein 14A [Source:RGD Symbol;Acc:1307710]
Ncoa4	chr16	896	643	95.9063	110.016	-14.1092	0.871752	0.00149285	0.00149285	FDR<0.05	-0.15141	negligible	183.71	181.619	185.802	0.309346	0.0771103	1.02303	0.938536	0.999945	Not Sig	nonsignificant	.	.	nuclear receptor coactivator 4 [Source:RGD Symbol;Acc:1563014]
Cops7b	chr9	231	171	98.3472	125.456	-27.1091	0.783916	0.00149303	0.00149303	FDR<0.05	-0.174423	negligible	41.5241	43.3883	39.6599	0.503642	-0.273437	0.914069	0.784517	0.999945	Not Sig	nonsignificant	.	Y	COP9 signalosome subunit 7B [Source:RGD Symbol;Acc:1306918]
Dlg3	chrX	558	389	95.5063	112.827	-17.3207	0.846484	0.00149771	0.00149771	FDR<0.05	-0.252195	small	63.829	66.561	61.0971	0.438399	-0.253931	0.917912	0.799549	0.999945	Not Sig	nonsignificant	.	.	discs large MAGUK scaffold protein 3 [Source:RGD Symbol;Acc:68423]
Nup54	chr14	221	161	102.785	133.036	-30.2506	0.772613	0.00150518	0.00150518	FDR<0.05	-0.304801	small	47.8718	48.9135	46.83	0.478826	-0.160069	0.957405	0.872827	0.999945	Not Sig	nonsignificant	.	.	nucleoporin 54 [Source:RGD Symbol;Acc:619926]
Ttf2	chr2	22	17	64.349	195.605	-131.256	0.328975	0.00150938	0.00150938	FDR<0.05	-1.10502	large	5.41329	3.98013	6.84645	1.29374	0.583297	1.72016	0.559694	0.999945	Not Sig	nonsignificant	.	.	transcription termination factor 2 [Source:RGD Symbol;Acc:1309145]
Skp1	chr10	26055	16854	111.187	115.273	-4.08554	0.964558	0.00151151	0.00151151	FDR<0.05	-0.0270984	negligible	4607.15	4490.89	4723.42	0.204606	0.353706	1.05178	0.723559	0.999945	Not Sig	nonsignificant	.	.	S-phase kinase-associated protein 1 [Source:RGD Symbol;Acc:1359648]
Pfkfb3	chr17	303	154	120.201	95.6715	24.5296	1.25639	0.00151393	0.00151393	FDR<0.05	0.316174	small	29.4186	23.4094	35.4277	0.587062	0.984786	1.5134	0.324729	0.999945	Not Sig	nonsignificant	.	.	6-phosphofructo-2-kinase/fructose-2,6-biphosphatase 3 [Source:RGD Symbol;Acc:619776]
Slc25a4	chr16	46642	28337	96.2353	95.5049	0.730366	1.00765	0.00151829	0.00151829	FDR<0.05	0.0448657	negligible	9044.69	8529.45	9559.93	0.199015	0.825837	1.12081	0.408897	0.999945	Not Sig	nonsignificant	.	Y	solute carrier family 25 member 4 [Source:RGD Symbol;Acc:620352]
Aip	chr1	2120	1407	90.1975	98.0111	-7.8136	0.920278	0.00151897	0.00151897	FDR<0.05	-0.126438	negligible	404.875	407.673	402.078	0.254279	-0.0946637	0.986276	0.924582	0.999945	Not Sig	nonsignificant	.	.	aryl-hydrocarbon receptor-interacting protein [Source:RGD Symbol;Acc:628619]
C2cd2l	chr8	805	474	83.5608	97.0004	-13.4397	0.861447	0.00153215	0.00153215	FDR<0.05	-0.177761	negligible	130.895	130.135	131.654	0.369564	0.0934279	1.01167	0.925564	0.999945	Not Sig	nonsignificant	.	Y	C2CD2-like [Source:RGD Symbol;Acc:1310281]
Smim18	chr16	668	529	107.356	120.423	-13.0668	0.891493	0.00153596	0.00153596	FDR<0.05	-0.165963	negligible	153.563	160.486	146.64	0.308004	-0.42475	0.913726	0.671019	0.999945	Not Sig	nonsignificant	.	Y	small integral membrane protein 18 [Source:RGD Symbol;Acc:6501537]
Bst2	chr16	42	16	85.472	38.7736	46.6984	2.20439	0.00154239	0.00154239	FDR<0.05	0.860584	large	6.26328	5.13211	7.39445	1.213	0.465916	1.44082	0.641276	0.999945	Not Sig	nonsignificant	.	.	bone marrow stromal cell antigen 2 [Source:RGD Symbol;Acc:727849]
LOC689130	chr3	5148	1608	89.3836	85.4868	3.89678	1.04558	0.0015441	0.0015441	FDR<0.05	0.135179	negligible	224.54	163.834	285.245	0.351678	2.31911	1.74106	0.0203893	0.999945	Not Sig	nonsignificant	.	.
Ggt7	chr3	2839	1961	104.3	112.151	-7.85133	0.929993	0.00154722	0.00154722	FDR<0.05	-0.0758153	negligible	566.546	577.85	555.241	0.247833	-0.249448	0.960875	0.803014	0.999945	Not Sig	nonsignificant	.	.	gamma-glutamyltransferase 7 [Source:RGD Symbol;Acc:619870]
Akap11	chr15	573	445	81.8396	99.6812	-17.8416	0.821014	0.00155224	0.00155224	FDR<0.05	-0.192205	negligible	75.132	81.748	68.516	0.401248	-0.609361	0.838136	0.542285	0.999945	Not Sig	nonsignificant	Y	Y	A-kinase anchoring protein 11 [Source:RGD Symbol;Acc:2079]
Prr13	chr7	1453	972	82.5949	91.269	-8.67403	0.904962	0.00155351	0.00155351	FDR<0.05	-0.131146	negligible	267.876	267.766	267.986	0.264931	-0.00491685	1.00082	0.996077	0.999945	Not Sig	nonsignificant	.	Y	proline rich 13 [Source:RGD Symbol;Acc:1307129]
Med4	chr15	626	509	85.8825	99.7805	-13.898	0.860714	0.00155374	0.00155374	FDR<0.05	-0.190644	negligible	132.052	145.274	118.83	0.333252	-0.889919	0.817976	0.37351	0.999945	Not Sig	nonsignificant	.	.	mediator complex subunit 4 [Source:RGD Symbol;Acc:1306671]
Ankra2	chr2	293	156	95.0928	121.667	-26.5742	0.781582	0.00155528	0.00155528	FDR<0.05	-0.351121	small	48.7322	47.472	49.9924	0.485835	0.202107	1.05309	0.839833	0.999945	Not Sig	nonsignificant	.	Y	ankyrin repeat family A member 2 [Source:RGD Symbol;Acc:1303108]
Dnaja2	chr19	1739	1057	105.056	115.985	-10.9298	0.905766	0.00155837	0.00155837	FDR<0.05	-0.121464	negligible	312.151	308.584	315.718	0.29232	0.134913	1.02312	0.89268	0.999945	Not Sig	nonsignificant	.	Y	DnaJ heat shock protein family (Hsp40) member A2 [Source:RGD Symbol;Acc:71001]
Epb41l1	chr3	1276	781	103.445	116.28	-12.8355	0.889616	0.00155975	0.00155975	FDR<0.05	-0.161008	negligible	75.3657	69.4927	81.2386	0.439212	0.569165	1.16902	0.569244	0.999945	Not Sig	nonsignificant	.	Y	erythrocyte membrane protein band 4.1-like 1 [Source:RGD Symbol;Acc:71087]
Foxo3	chr20	374	157	106.311	88.7353	17.5755	1.19807	0.00156882	0.00156882	FDR<0.05	0.322409	small	10.9529	11.0759	10.8299	0.925902	-0.001832	0.97779	0.998538	0.999945	Not Sig	nonsignificant	.	Y	forkhead box O3 [Source:RGD Symbol;Acc:1309196]
Pts	chr8	467	358	96.454	114.858	-18.4038	0.839769	0.00157464	0.00157464	FDR<0.05	-0.177743	negligible	92.3017	104.661	79.9427	0.363064	-1.08279	0.763828	0.278903	0.999945	Not Sig	nonsignificant	.	.	6-pyruvoyl-tetrahydropterin synthase [Source:RGD Symbol;Acc:68367]
Bnip3	chr1	4940	3582	108.315	114.063	-5.74839	0.949604	0.00157603	0.00157603	FDR<0.05	-0.0745467	negligible	873.714	889.321	858.107	0.241073	-0.226965	0.964901	0.820451	0.999945	Not Sig	nonsignificant	.	Y	BCL2 interacting protein 3 [Source:RGD Symbol;Acc:620800]
Ift27	chr7	597	436	83.1706	94.7873	-11.6167	0.877444	0.00157774	0.00157774	FDR<0.05	-0.182346	negligible	128.226	127.861	128.59	0.329656	0.00207337	1.00571	0.998346	0.999945	Not Sig	nonsignificant	.	.	intraflagellar transport 27 [Source:RGD Symbol;Acc:1308703]
Kitlg	chr7	221	112	130.883	108.045	22.8383	1.21138	0.00158297	0.00158297	FDR<0.05	0.343914	small	21.0799	18.4083	23.7514	0.698417	0.471498	1.29025	0.637285	0.999945	Not Sig	nonsignificant	.	Y	KIT ligand [Source:RGD Symbol;Acc:3086]
Kcnc4	chr2	287	217	81.3609	102.219	-20.8581	0.795947	0.00158329	0.00158329	FDR<0.05	-0.244864	small	43.849	54.9335	32.7645	0.598222	-1.19235	0.59644	0.233126	0.999945	Not Sig	nonsignificant	.	Y	potassium voltage-gated channel subfamily C member 4 [Source:RGD Symbol;Acc:1589169]
RGD1561916	chr5	844	541	72.9304	80.3829	-7.45246	0.907288	0.00159427	0.00159427	FDR<0.05	-0.170897	negligible	148.22	138.596	157.844	0.312142	0.584096	1.13888	0.559156	0.999945	Not Sig	nonsignificant	.	.	similar to testes development-related NYD-SP22 isoform 1 [Source:RGD Symbol;Acc:1561916]
LOC102554879	chr12	200	131	112.616	145.981	-33.3648	0.771444	0.00160233	0.00160233	FDR<0.05	-0.398925	small	32.2468	27.0492	37.4443	0.567854	0.783915	1.3843	0.43309	0.999945	Not Sig	nonsignificant	.	.
Plgrkt	chr1	414	285	91.5677	111.268	-19.7004	0.822947	0.00161236	0.00161236	FDR<0.05	-0.238821	small	81.64	85.7282	77.5518	0.400058	-0.349843	0.904625	0.726456	0.999945	Not Sig	nonsignificant	.	.	plasminogen receptor with a C-terminal lysine [Source:RGD Symbol;Acc:1306839]
Naa10	chrX	952	655	99.8339	111.303	-11.4696	0.896952	0.00161608	0.00161608	FDR<0.05	-0.120577	negligible	188.071	187.351	188.791	0.289101	0.0425881	1.00769	0.96603	0.999945	Not Sig	nonsignificant	.	.	N(alpha)-acetyltransferase 10, NatA catalytic subunit [Source:RGD Symbol;Acc:1565315]
Ift172	chr6	134	98	123.357	88.9223	34.4342	1.38724	0.00161694	0.00161694	FDR<0.05	0.366918	small	25.8264	25.6605	25.9923	0.629754	0.0735053	1.01293	0.941404	0.999945	Not Sig	nonsignificant	.	.	intraflagellar transport 172 [Source:RGD Symbol;Acc:620744]
Rnf14	chr18	6207	4315	106.434	113.635	-7.20112	0.93663	0.00161722	0.00161722	FDR<0.05	-0.0489301	negligible	1433.13	1437.05	1429.21	0.22462	-0.0428718	0.994539	0.965804	0.999945	Not Sig	nonsignificant	.	.	ring finger protein 14 [Source:RGD Symbol;Acc:1589576]
Ppdpf	chr3	3213	2093	101.453	106.504	-5.05141	0.952571	0.00163002	0.00163002	FDR<0.05	-0.0979575	negligible	613.417	612.957	613.878	0.229469	0.0140749	1.0015	0.98877	0.999945	Not Sig	nonsignificant	.	.	pancreatic progenitor cell differentiation and proliferation factor [Source:RGD Symbol;Acc:1310660]
Ppt1	chr5	2842	1954	87.9989	94.9691	-6.97025	0.926605	0.0016323	0.0016323	FDR<0.05	-0.0698251	negligible	295.136	280.361	309.911	0.264881	0.529076	1.1054	0.596753	0.999945	Not Sig	nonsignificant	.	.	palmitoyl-protein thioesterase 1 [Source:RGD Symbol;Acc:61994]
Apba1	chr1	493	315	110.536	131.936	-21.4001	0.837799	0.00163386	0.00163386	FDR<0.05	-0.196598	negligible	22.1881	21.4712	22.905	0.663792	0.175106	1.06678	0.860997	0.999945	Not Sig	nonsignificant	.	Y	amyloid beta precursor protein binding family A member 1 [Source:RGD Symbol;Acc:620844]
Lactb2	chr5	1037	849	87.1931	97.3956	-10.2025	0.895247	0.00163759	0.00163759	FDR<0.05	-0.1476	negligible	200.473	205.709	195.237	0.304465	-0.273728	0.949095	0.784294	0.999945	Not Sig	nonsignificant	.	.	lactamase, beta 2 [Source:RGD Symbol;Acc:1307876]
Gnpda2	chr14	455	356	98.7002	115.285	-16.5847	0.856142	0.00163948	0.00163948	FDR<0.05	-0.187614	negligible	105.342	114.559	96.1243	0.375805	-0.702095	0.83908	0.48262	0.999945	Not Sig	nonsignificant	.	Y	glucosamine-6-phosphate deaminase 2 [Source:RGD Symbol;Acc:1305521]
Grwd1	chr1	291	232	99.0398	119.716	-20.676	0.827291	0.00164704	0.00164704	FDR<0.05	-0.265688	small	65.4392	71.8241	59.0543	0.418465	-0.657594	0.822208	0.510799	0.999945	Not Sig	nonsignificant	.	.	glutamate-rich WD repeat containing 1 [Source:RGD Symbol;Acc:1310649]
Cinp	chr6	1318	878	94.6419	104.141	-9.49889	0.908788	0.00165549	0.00165549	FDR<0.05	-0.107136	negligible	235.033	229.142	240.923	0.275051	0.269834	1.05142	0.787288	0.999945	Not Sig	nonsignificant	Y	Y	cyclin-dependent kinase 2-interacting protein [Source:RGD Symbol;Acc:1563395]
Thyn1	chr8	1851	1218	99.2235	107.393	-8.16947	0.923929	0.00166641	0.00166641	FDR<0.05	-0.115048	negligible	328.695	333.411	323.978	0.257701	-0.173106	0.971706	0.862568	0.999945	Not Sig	nonsignificant	.	.	thymocyte nuclear protein 1 [Source:RGD Symbol;Acc:1359525]
Bad	chr1	1926	1246	88.9903	96.2574	-7.26706	0.924504	0.00166981	0.00166981	FDR<0.05	-0.123233	negligible	374.877	371.875	377.879	0.246257	0.0966425	1.01615	0.92301	0.999945	Not Sig	nonsignificant	.	.	BCL2-associated agonist of cell death [Source:RGD Symbol;Acc:620103]
Creb3	chr5	1261	868	92.7178	101.483	-8.76525	0.913628	0.00167255	0.00167255	FDR<0.05	-0.120661	negligible	252.861	261.139	244.583	0.27108	-0.340819	0.9366	0.73324	0.999945	Not Sig	nonsignificant	.	.	cAMP responsive element binding protein 3 [Source:RGD Symbol;Acc:1308831]
Adsl	chr7	2396	1475	112.493	124.217	-11.7231	0.905624	0.00167273	0.00167273	FDR<0.05	-0.100515	negligible	460.583	437.601	483.565	0.240634	0.588277	1.10504	0.556346	0.999945	Not Sig	nonsignificant	.	.	adenylosuccinate lyase [Source:RGD Symbol;Acc:1307617]
Sod2	chr1	1264	606	97.0624	106.709	-9.64669	0.909598	0.00167689	0.00167689	FDR<0.05	-0.16143	negligible	37.5603	29.5096	45.611	0.547712	1.20268	1.54563	0.229098	0.999945	Not Sig	nonsignificant	.	Y	superoxide dismutase 2 [Source:RGD Symbol;Acc:3732]
Eri3	chr5	2676	1738	102.107	108.745	-6.63725	0.938965	0.00168078	0.00168078	FDR<0.05	-0.0796277	negligible	513.249	520.997	505.5	0.231276	-0.189297	0.970255	0.84986	0.999945	Not Sig	nonsignificant	.	.	ERI1 exoribonuclease family member 3 [Source:RGD Symbol;Acc:1595859]
Hp1bp3	chr5	1325	794	102.985	116.161	-13.1757	0.886574	0.00168908	0.00168908	FDR<0.05	-0.105764	negligible	215.317	203.874	226.759	0.281541	0.544567	1.11225	0.586052	0.999945	Not Sig	nonsignificant	.	.	heterochromatin protein 1, binding protein 3 [Source:RGD Symbol;Acc:735099]
Hmgb1	chr12	3386	2257	104.04	109.922	-5.8818	0.946491	0.00169789	0.00169789	FDR<0.05	-0.0964555	negligible	367.888	369.076	366.7	0.25545	-0.0537635	0.993564	0.957124	0.999945	Not Sig	nonsignificant	Y	Y	high mobility group box 1 [Source:RGD Symbol;Acc:2802]
Usp3	chr8	119	84	107.23	76.7404	30.4899	1.39731	0.00170836	0.00170836	FDR<0.05	0.400731	small	24.4793	26.0537	22.905	0.625136	-0.285964	0.879146	0.774906	0.999945	Not Sig	nonsignificant	.	Y	ubiquitin specific peptidase 3 [Source:RGD Symbol;Acc:1308852]
Gpr180	chr15	135	82	95.9945	132.843	-36.8484	0.722617	0.00171636	0.00171636	FDR<0.05	-0.44403	small	16.487	19.4547	13.5193	0.821962	-0.589752	0.69491	0.555357	0.999945	Not Sig	nonsignificant	.	.	G protein-coupled receptor 180 [Source:RGD Symbol;Acc:1359193]
Tmem198	chr9	351	143	119.327	92.5447	26.7822	1.2894	0.00172009	0.00172009	FDR<0.05	0.322531	small	43.4746	36.134	50.8152	0.567429	0.92514	1.4063	0.354893	0.999945	Not Sig	nonsignificant	.	.	transmembrane protein 198 [Source:RGD Symbol;Acc:2319152]
Rex1bd	chr16	853	434	90.8305	101.929	-11.0983	0.891118	0.00172202	0.00172202	FDR<0.05	-0.219157	small	149.687	139.038	160.336	0.35539	0.623752	1.15318	0.53279	0.999945	Not Sig	nonsignificant	.	.	required for excision 1-B domain containing [Source:RGD Symbol;Acc:1566239]
Ddx50	chr20	604	348	94.8108	78.5945	16.2163	1.20633	0.00172271	0.00172271	FDR<0.05	0.195183	negligible	112.303	111.625	112.981	0.340435	0.0544076	1.01215	0.95661	0.999945	Not Sig	nonsignificant	.	.	DExD-box helicase 50 [Source:RGD Symbol;Acc:1310934]
Pgap2	chr1	223	135	92.1781	121.871	-29.6925	0.75636	0.00172847	0.00172847	FDR<0.05	-0.304006	small	26.2792	22.807	29.7514	0.608439	0.616802	1.30449	0.537365	0.999945	Not Sig	nonsignificant	.	.	post-GPI attachment to proteins 2 [Source:RGD Symbol;Acc:619744]
Itgb1bp1	chr6	929	640	101.268	115.907	-14.6394	0.873697	0.00172964	0.00172964	FDR<0.05	-0.156929	negligible	180.862	187.273	174.45	0.291316	-0.354645	0.931527	0.722856	0.999945	Not Sig	nonsignificant	.	.	integrin subunit beta 1 binding protein 1 [Source:RGD Symbol;Acc:1307810]
Kcng1	chr3	245	252	77.3786	103.819	-26.4403	0.745323	0.00173524	0.00173524	FDR<0.05	-0.237621	small	11.5175	11.7565	11.2784	0.949835	-0.00509849	0.959333	0.995932	0.999945	Not Sig	nonsignificant	.	Y	potassium voltage-gated channel modifier subfamily G member 1 [Source:RGD Symbol;Acc:631416]
Mrpl21	chr1	1273	912	81.8243	92.242	-10.4176	0.887062	0.0017594	0.0017594	FDR<0.05	-0.164984	negligible	253.842	269.598	238.086	0.267029	-0.677277	0.883113	0.49823	0.999945	Not Sig	nonsignificant	.	Y	mitochondrial ribosomal protein L21 [Source:RGD Symbol;Acc:1310203]
Epm2aip1	chr8	813	466	107.165	126.924	-19.7591	0.844323	0.00177325	0.00177325	FDR<0.05	-0.099351	negligible	12.5944	12.0186	13.1702	0.857413	0.180017	1.09582	0.857139	0.999945	Not Sig	nonsignificant	.	Y	EPM2A interacting protein 1 [Source:RGD Symbol;Acc:1310977]
Tbc1d13	chr3	269	177	110.373	141.276	-30.9029	0.781258	0.00177427	0.00177427	FDR<0.05	-0.316372	small	39.5376	40.5601	38.515	0.50503	-0.148031	0.949578	0.882319	0.999945	Not Sig	nonsignificant	.	.	TBC1 domain family, member 13 [Source:RGD Symbol;Acc:1591937]
Fam104a	chr10	735	486	84.4004	99.0915	-14.6911	0.851742	0.00178191	0.00178191	FDR<0.05	-0.197268	negligible	49.4695	48.5732	50.3658	0.468617	0.0803242	1.03691	0.935979	0.999945	Not Sig	nonsignificant	Y	.	family with sequence similarity 104, member A [Source:RGD Symbol;Acc:1563409]
Lgalsl	chr14	692	476	85.6717	102.338	-16.6659	0.837148	0.00178578	0.00178578	FDR<0.05	-0.167047	negligible	94.2796	103.116	85.4436	0.387984	-0.710613	0.82862	0.477324	0.999945	Not Sig	nonsignificant	.	.	galectin-like [Source:RGD Symbol;Acc:1307414]
Farsa	chr19	621	424	101.437	122.25	-20.8132	0.829749	0.00178808	0.00178808	FDR<0.05	-0.230321	small	122.446	123.697	121.196	0.331605	-0.0977963	0.979782	0.922094	0.999945	Not Sig	nonsignificant	.	.	phenylalanyl-tRNA synthetase subunit alpha [Source:RGD Symbol;Acc:1310314]
Atxn10	chr7	4703	3292	105.278	111.199	-5.92118	0.946752	0.0017891	0.0017891	FDR<0.05	-0.082528	negligible	929.295	936.894	921.696	0.221102	-0.115051	0.983778	0.908404	0.999945	Not Sig	nonsignificant	.	.	ataxin 10 [Source:RGD Symbol;Acc:621813]
Ccdc106	chr1	430	260	90.7987	112.27	-21.4712	0.808753	0.00179697	0.00179697	FDR<0.05	-0.222452	small	77.6722	73.16	82.1845	0.395772	0.432914	1.12335	0.665077	0.999945	Not Sig	nonsignificant	.	.	coiled-coil domain containing 106 [Source:RGD Symbol;Acc:1566222]
Mtres1	chr20	697	572	79.376	92.7718	-13.3958	0.855604	0.00180444	0.00180444	FDR<0.05	-0.118443	negligible	160.52	176.616	144.425	0.302148	-0.962047	0.817733	0.336026	0.999945	Not Sig	nonsignificant	.	.	mitochondrial transcription rescue factor 1 [Source:RGD Symbol;Acc:1597785]
Crtc1	chr16	410	180	85.871	111.841	-25.9697	0.767797	0.00180554	0.00180554	FDR<0.05	-0.210647	small	21.3176	17.9624	24.6729	0.694737	0.705851	1.37359	0.480281	0.999945	Not Sig	nonsignificant	.	.	CREB regulated transcription coactivator 1 [Source:RGD Symbol;Acc:1589158]
Ppp6c	chr3	1312	844	98.1127	109.057	-10.9446	0.899644	0.00181034	0.00181034	FDR<0.05	-0.12465	negligible	278.636	272.978	284.294	0.272323	0.191723	1.04145	0.847959	0.999945	Not Sig	nonsignificant	Y	.	protein phosphatase 6, catalytic subunit [Source:RGD Symbol;Acc:708460]
Cbr1	chr11	187	117	121.594	155.32	-33.7262	0.78286	0.0018131	0.0018131	FDR<0.05	-0.483783	small	96.2683	93.8469	98.6898	0.365303	0.168631	1.0516	0.866087	0.999945	Not Sig	nonsignificant	.	.
Spata33	chr19	723	542	69.2613	78.426	-9.16475	0.883141	0.00181349	0.00181349	FDR<0.05	-0.19109	negligible	124.432	134.09	114.774	0.346849	-0.609829	0.855944	0.541975	0.999945	Not Sig	nonsignificant	.	.	spermatogenesis associated 33 [Source:RGD Symbol;Acc:1561507]
Dmtf1	chr4	527	375	91.2614	109.531	-18.2695	0.833202	0.00181505	0.00181505	FDR<0.05	-0.203863	small	105.203	100.315	110.092	0.362734	0.332176	1.09747	0.739757	0.999945	Not Sig	nonsignificant	.	.	cyclin D binding myb-like transcription factor 1 [Source:RGD Symbol;Acc:70966]
Bub3	chr1	1443	1139	88.8927	96.0769	-7.18423	0.925224	0.00183182	0.00183182	FDR<0.05	-0.122621	negligible	305.812	327.256	284.367	0.263579	-0.769947	0.868942	0.441331	0.999945	Not Sig	nonsignificant	.	.	BUB3 mitotic checkpoint protein [Source:RGD Symbol;Acc:1306654]
Armt1	chr1	582	412	95.5794	111.633	-16.0533	0.856196	0.00183996	0.00183996	FDR<0.05	-0.142496	negligible	119.361	121.236	117.486	0.355293	-0.158307	0.969062	0.874215	0.999945	Not Sig	nonsignificant	.	.	acidic residue methyltransferase 1 [Source:RGD Symbol;Acc:1305235]
Cav2	chr4	121	60	75.4556	106.987	-31.5311	0.70528	0.00184117	0.00184117	FDR<0.05	-0.532291	medium	22.6934	20.2663	25.1205	0.693288	0.510479	1.23952	0.609716	0.999945	Not Sig	nonsignificant	.	Y	caveolin 2 [Source:RGD Symbol;Acc:620348]
Agtpbp1	chr17	903	567	96.5689	111.241	-14.6724	0.868103	0.00184196	0.00184196	FDR<0.05	-0.193124	negligible	185.723	167.791	203.654	0.291111	0.971303	1.21374	0.331397	0.999945	Not Sig	nonsignificant	.	.	ATP/GTP binding carboxypeptidase 1 [Source:RGD Symbol;Acc:1306307]
Ist1	chr19	1385	930	109.346	121.278	-11.9323	0.901612	0.00184474	0.00184474	FDR<0.05	-0.129439	negligible	250.627	252.213	249.04	0.273878	-0.0860644	0.987421	0.931415	0.999945	Not Sig	nonsignificant	.	Y	IST1 factor associated with ESCRT-III [Source:RGD Symbol;Acc:1307799]
Arl5b	chr17	493	34	132.463	91.6156	40.847	1.44585	0.00184738	0.00184738	FDR<0.05	0.518461	medium	8.99968	0.471358	17.528	1.70814	2.85601	37.1862	0.00428999	0.560447	Not Sig	nonsignificant	.	Y	ADP-ribosylation factor like GTPase 5B [Source:RGD Symbol;Acc:1305569]
Elmo2	chr3	1127	730	110.516	120.871	-10.3542	0.914337	0.00184904	0.00184904	FDR<0.05	-0.159006	negligible	197.586	202.72	192.452	0.299227	-0.225352	0.949347	0.821705	0.999945	Not Sig	nonsignificant	.	.	engulfment and cell motility 2 [Source:RGD Symbol;Acc:1305784]
Adprh	chr11	1717	1141	80.5015	87.0971	-6.59558	0.924273	0.0018494	0.0018494	FDR<0.05	-0.140784	negligible	332.707	319.402	346.013	0.251073	0.455084	1.08332	0.649049	0.999945	Not Sig	nonsignificant	.	.	ADP-ribosylarginine hydrolase [Source:RGD Symbol;Acc:2052]
Atp13a1	chr16	174	122	106.834	140.096	-33.2624	0.762575	0.0018508	0.0018508	FDR<0.05	-0.288711	small	25.3851	22.8852	27.8849	0.663009	0.457244	1.21847	0.647496	0.999945	Not Sig	nonsignificant	.	.	ATPase 13A1 [Source:RGD Symbol;Acc:1306033]
Stx8	chr10	1886	1217	87.2881	94.3019	-7.01384	0.925624	0.00185934	0.00185934	FDR<0.05	-0.0937871	negligible	317.803	312.672	322.934	0.253383	0.184928	1.03282	0.853285	0.999945	Not Sig	nonsignificant	.	.	syntaxin 8 [Source:RGD Symbol;Acc:61917]
Smdt1	chr7	3908	2033	85.2133	89.7716	-4.55831	0.949223	0.00187326	0.00187326	FDR<0.05	-0.0912345	negligible	430.166	364.509	495.822	0.33244	1.36258	1.36025	0.173015	0.999945	Not Sig	nonsignificant	.	.	single-pass membrane protein with aspartate-rich tail 1 [Source:RGD Symbol;Acc:1311310]
Arpc4	chr4	8726	5276	106.036	109.008	-2.97201	0.972736	0.00188607	0.00188607	FDR<0.05	-0.0520339	negligible	1651.9	1580.98	1722.83	0.207968	0.596883	1.08972	0.550586	0.999945	Not Sig	nonsignificant	.	.	actin related protein 2/3 complex, subunit 4 [Source:RGD Symbol;Acc:1310096]
Spryd7	chr15	923	539	90.9822	102.61	-11.628	0.886678	0.0019044	0.0019044	FDR<0.05	-0.166256	negligible	113.622	105.026	122.218	0.340533	0.659547	1.16369	0.509544	0.999945	Not Sig	nonsignificant	.	.	SPRY domain containing 7 [Source:RGD Symbol;Acc:1306437]
Mesd	chr1	1604	1214	81.6967	89.7173	-8.02058	0.910602	0.00190487	0.00190487	FDR<0.05	-0.125825	negligible	334.142	346.846	321.439	0.267284	-0.433057	0.926747	0.664974	0.999945	Not Sig	nonsignificant	.	.	mesoderm development LRP chaperone [Source:RGD Symbol;Acc:1310344]
Nudt16	chr8	788	354	84.8299	97.113	-12.2831	0.873517	0.00192138	0.00192138	FDR<0.05	-0.180107	negligible	120.052	96.6984	143.405	0.369308	1.59422	1.48302	0.110888	0.999945	Not Sig	nonsignificant	.	.	nudix hydrolase 16 [Source:RGD Symbol;Acc:1311387]
Mgst1	chr4	314	218	71.9057	90.0488	-18.1431	0.798519	0.0019249	0.0019249	FDR<0.05	-0.29729	small	63.1144	63.8385	62.3903	0.424091	-0.088942	0.977315	0.929128	0.999945	Not Sig	nonsignificant	Y	Y	microsomal glutathione S-transferase 1 [Source:RGD Symbol;Acc:70927]
Klc1	chr6	2779	1795	122.754	130.307	-7.55289	0.942038	0.00192524	0.00192524	FDR<0.05	-0.0902029	negligible	496.892	519.493	474.291	0.665319	-0.194871	0.912988	0.845494	0.999945	Not Sig	nonsignificant	.	.	kinesin light chain 1 [Source:RGD Symbol;Acc:621411]
[truncated: 10,114 more rows]

## Sheet: cDNA_60min
gene_name	chrom	Ipsi_60min_counts	Contra_60min_counts	Ipsi_60min_polya_gm_mean	Contra_60min_polya_gm_mean	polya_length_diff	polya_fold_change	polya_pvalue	polya_padj	polya_sig	polya_cohen_d	polya_effect_size	diffexp_baseMean	diffexp_baseMean_1	diffexp_baseMean_2	diffexp_lfcSE	diffexp_stat	diffexp_fold_change	diffexp_pvalue	diffexp_padj	diffexp_sig	diffexp_effect	cpeb1	cpeb2	gene_description
[truncated: 12,592 more rows]

[truncated: 6 more sheets: GO_up_polya_10min, GO_up_polya_60min, GO_up_diffexp_10min, GO_up_diffexp_60min, GO_up_CPEB_10min, GO_up_CPEB_60min]
