# Supplementary material
Source: HighWire-hosted journal article supplement (doi:10.1101/rna.080485.125)
Supplement: Supplementary_Table_4.xlsx [file Supplementary_Table_4.xlsx]

## Sheet: TAPAS_APA_10min
chrom	gene_name	strand	APA_site	annotation	APA_motif	log2_fold_change	p_value	adj_p_value	decision	significance	source	gene_description	seq_context
chr1	Aamdc	-	151861989	unassigned	GATAAA	0.142128	0.919919	1	N	Not Sig	ncbiRefSeq	adipogenesis associated, Mth938 domain containing [Source:RGD Symbol;Acc:1561459]	CCAAAAATAGTTTGGATTAATGTTCCAAAGCATCAACTATGGTGAGATCTTTAATGCTCT
chr1	Aamdc	-	151862200	3UTR	none	0.265801	0.856984	1	N	Not Sig	ncbiRefSeq	adipogenesis associated, Mth938 domain containing [Source:RGD Symbol;Acc:1561459]	ATCAATCTGTTCCAAGAACATGAACATGTGTCCAAAGTACACAGAGGAGGCTGATGTGGA
chr1	Abcc2	+	242723237	3UTR	AATAAA	-0.409514	0.675616	1	N	Not Sig	ncbiRefSeq	ATP binding cassette subfamily C member 2 [Source:RGD Symbol;Acc:2366]	CCAGAGACCTGTAAAAATAGACACTTCAAAGATTATCATGAATAAATATTTAAATAAATA
chr1	Abcc6	-	96447223	unassigned	none	-1.1292	0.457091	1	N	Not Sig	ncbiRefSeq	ATP binding cassette subfamily C member 6 [Source:RGD Symbol;Acc:620268]	AGCCATGGTACTAAGGTTAGCTCCTCGCTTGGTAGAAACCCTAAGAATGAGCTGCAGGCT
chr1	Abcc8	-	96611498	CDS	none	-0.162982	0.877316	1	N	Not Sig	ncbiRefSeq	ATP binding cassette subfamily C member 8 [Source:RGD Symbol;Acc:3786]	GCACTGTCCGTCCACTTGGCCAGCCAGTAGTCAATGGCCACCAAGACCATGTGCTTGAGC
chr1	Abhd17b	+	219232732	3UTR	AGTAAA	-0.24604	0.703639	1	N	Not Sig	ncbiRefSeq	abhydrolase domain containing 17B, depalmitoylase [Source:RGD Symbol;Acc:1305246]	TATTGTGAATGCTTTGGTTCAGACATGTCAAATTAACAGTAAAACAGCAAATGTATCACT
chr1	Abhd17c	-	138084631	unassigned	AATACA	-0.501658	0.41124	1	N	Not Sig	ncbiRefSeq	abhydrolase domain containing 17C, depalmitoylase [Source:RGD Symbol;Acc:1308210]	TGGTACGTTCTCACGGTTTCTTTTGATGGCGGATGAAGGAAGGAGCACATAAGCCCACGC
chr1	Abhd2	+	133298291	3UTR	none	-1.0435	0.390157	1	N	Not Sig	ncbiRefSeq	abhydrolase domain containing 2, acylglycerol lipase [Source:RGD Symbol;Acc:1311389]	GTTTTCTCCATTGCATTGTTAGCCATGGTGACAAGCTACAAGATTCTCACCCTTCTGTCC
chr1	Abhd2	+	133298563	3UTR	none	0.510948	0.600754	1	N	Not Sig	ncbiRefSeq	abhydrolase domain containing 2, acylglycerol lipase [Source:RGD Symbol;Acc:1311389]	CCGAGGACCTGGGGCTTCCTGGGCCTGAACTTTGCCTGTGAAGCAAAGGAAGTTCTCTGA
chr1	Ablim1	-	256084292	unassigned	none	-0.409905	0.260387	1	N	Not Sig	ncbiRefSeq		ATCTTTGGGCTCCCCTCTTCCCATCTTTCACCCCGGGAAGTGAATCACAGGACTGTCACT
chr1	Abracl	-	12654950	unassigned	none	-0.0330637	0.925006	1	N	Not Sig	ncbiRefSeq	ABRA C-terminal like [Source:RGD Symbol;Acc:1583256]	AAGAACTCATTTGTTAAGAGGCACATTCATACTTGAATGACAAAACACAGACTTCAGGAA
chr1	Abracl	-	12655075	3UTR	AAGAAA	-0.564077	0.522646	1	N	Not Sig	ncbiRefSeq	ABRA C-terminal like [Source:RGD Symbol;Acc:1583256]	TCGCTTCTCACTTTGACGGAGTGTCAAGTGTGGCAGAGACTAAGAATGGTTTAAGAAAAC
chr1	Abraxas2	+	187672660	3UTR	AATAAA	-0.148828	0.513832	1	N	Not Sig	ncbiRefSeq	abraxas 2, BRISC complex subunit [Source:RGD Symbol;Acc:1308918]	ATACAGTGTATATCTGACAAAGCAGTTAAATGTGACAATAAAAACTTATTTAATCATGAT
chr1	Acadsb	+	186227713	intron	none	-0.329524	0.659493	1	N	Not Sig	ncbiRefSeq	acyl-CoA dehydrogenase, short/branched chain [Source:RGD Symbol;Acc:2013]	CGTCTCTGTGTGGCTCTCCTTAGCTCTGGGTACACTCCTGATTATCCTGTTTCTCCCTTT
chr1	Acan	+	133044415	3UTR	AATAAA	0.871081	0.312105	1	N	Not Sig	ncbiRefSeq	aggrecan [Source:RGD Symbol;Acc:68358]	CTATTTATATTTTTGAAAACTAAAGATTATGATAATTATAATAATAAAGACATTGGAAGA
chr1	Acat2	+	47713879	3UTR	AATAAA	0.0699952	0.902359	1	N	Not Sig	ncbiRefSeq	acetyl-CoA acetyltransferase 2 [Source:RGD Symbol;Acc:1359366]	TCCCCAAAATGATGAACTGTAACTGGAATTGAAAGCCAAATAAACTCTTCCCTCCCTTGC
chr1	Acat2l1	+	47829012	3UTR	none	-0.240493	0.81408	1	N	Not Sig	ncbiRefSeq	acetyl-CoA acetyltransferase 2-like 1 [Source:RGD Symbol;Acc:1562948]	TCGCAATGTGTGTTCAGAGAGGGTGAGCCACCACCCTTACAGTTCTCATTCAAACACTAA
chr1	Acer3	-	152504179	unassigned	ACTAAA	0.170595	1	1	N	Not Sig	ncbiRefSeq	alkaline ceramidase 3 [Source:RGD Symbol;Acc:1561254]	AAGCTACTAAATCTTACAAGGAACATATAGATTTTGGTAAAGATTTTTCTTCCAAAACCA
chr1	Acer3	-	152506514	3UTR	AATACA	-0.482649	0.346216	1	N	Not Sig	ncbiRefSeq	alkaline ceramidase 3 [Source:RGD Symbol;Acc:1561254]	TGAGAAAAACCCCTACTTTTCTTTGGAAGCCATAGCTCAGGATGCAATCAACAGACATAA
chr1	Acp4	-	94736375	3UTR	none	-0.0364919	0.862775	1	N	Not Sig	ncbiRefSeq	acid phosphatase 4 [Source:RGD Symbol;Acc:1308270]	TGGCCACTTCAGGGTCCCCACCCCTCTGCCTCCACATGGGCCCCAAAGCACTACATACAG
chr1	Acsl5	+	254336607	3UTR	AATAAA	-0.024513	0.984661	1	N	Not Sig	ncbiRefSeq	acyl-CoA synthetase long-chain family member 5 [Source:RGD Symbol;Acc:69402]	ATAGCATGTGGTGCCTCTACCTGTAAATGTCAGATCTTTGAAATAAACTATTACAGATAT
chr1	Acsm3	+	174159966	3UTR	AATAAA	-0.279862	0.693339	1	N	Not Sig	ncbiRefSeq	acyl-CoA synthetase medium-chain family member 3 [Source:RGD Symbol;Acc:62086]	AGCTGTCATATTCTATGGTTAGTTATTAAATTTAACCTAATAAATATGGTTTATAAAAAT
chr1	Acsm5	+	173896837	3UTR	AATAAA	0.990114	0.403328	1	N	Not Sig	ncbiRefSeq	acyl-CoA synthetase medium-chain family member 5 [Source:RGD Symbol;Acc:1309578]	AGAGTGATCCTGCTTCCATGAATAAAGTGGAAGAACAACGGGAGATGGTTCCTGACATGA
chr1	Acta2	-	231746526	unassigned	AATAAG	-0.780464	0.82625	1	N	Not Sig	ncbiRefSeq	actin alpha 2, smooth muscle [Source:RGD Symbol;Acc:621676]	TAACCACTAGAGGGAGGCGTCCTATAATAAGTGATTCTCACCTAACAGAAACACAACTGA
chr1	Actn4	-	84182782	3UTR	none	0.133343	0.585446	1	N	Not Sig	ncbiRefSeq	actinin alpha 4 [Source:RGD Symbol;Acc:61816]	CAGTGAGCACTGCAAGCTCCCTGGGGAATGACGGGGACGCAGGGAGAAGATGACACCAGA
chr1	Actr1a	-	245237820	unassigned	none	0.0813953	0.977268	1	N	Not Sig	ncbiRefSeq	actin related protein 1A [Source:RGD Symbol;Acc:1307025]	TCACTTTTAGGGAGCTTCCCTTTCTTCCTACCAGGCACTGGTCACACAGAGGTCAGACTG
chr1	Acy3	+	201282951	intron	none	-0.12481	0.81649	1	N	Not Sig	ncbiRefSeq	aminoacylase 3 [Source:RGD Symbol;Acc:1305394]	CTGTTGTATACCCTCTGTTTGTTAATGAGGCCGCCTACTACGAGAAGCGTGTGGCTTTTC
chr1	Acy3	+	201283180	intron	TATAAA	-0.0035464	0.959851	1	N	Not Sig	ncbiRefSeq	aminoacylase 3 [Source:RGD Symbol;Acc:1305394]	CACCATGTCCTTTTCCAGACAACTGATCTCATGATATAAAATAGACTGTGCCCCTCAAAA
chr1	Adam12	-	188686983	unassigned	none	-2.1708	0.0328215	0.98925	N	Not Sig	ncbiRefSeq	ADAM metallopeptidase domain 12 [Source:RGD Symbol;Acc:1583652]	TGCTGCACAAGACTTTCCCCTTAGTTATGTATCAATAACATTCTGGATAACACACTCAAA
chr1	Adam8	-	194776558	unassigned	AATAAA	-0.894941	0.381933	1	N	Not Sig	ncbiRefSeq	ADAM metallopeptidase domain 8 [Source:RGD Symbol;Acc:1566394]	AAGGGAGATGGTGGGTGAAATAGTTTGAGCTGGTGAAATAAAAACAAACTGCCCTTTAGA
chr1	Adamts17	+	120768203	intron	AATAAA	-0.278964	0.756706	1	N	Not Sig	ncbiRefSeq	ADAM metallopeptidase with thrombospondin type 1 motif, 17 [Source:RGD Symbol;Acc:1308783]	AAAAACTCATCGTTCCATTGGGAGCAAGTTGGACATGTGTAATAAAATGTTTTTCCATAA
chr1	Adat2	+	7972710	3UTR	none	-0.812737	0.55038	1	N	Not Sig	ncbiRefSeq	adenosine deaminase, tRNA-specific 2 [Source:RGD Symbol;Acc:1309642]	ACCTGGACAGAATTCCGGCCTGAATGCTGCTGGCATCACTGGTCACGTTTACATGTTATT
chr1	Adat2	+	7975252	3UTR	AATAAA	0.228403	0.835908	1	N	Not Sig	ncbiRefSeq	adenosine deaminase, tRNA-specific 2 [Source:RGD Symbol;Acc:1309642]	TTTAGGGGAAAAATGATAATAGCAACAGCAACGACAATAAAGGTGAAAACATAGAACCAG
chr1	Adcy2	+	34762623	intron	AATAAA	0.196084	1	1	N	Not Sig	ncbiRefSeq	adenylate cyclase 2 [Source:RGD Symbol;Acc:619965]	AACAGAGTATCTCCTGGCATGTTTCCATCCTGAAAATAAAGGTTGATATTTTCATCCTCA
chr1	Adcy2	+	34776383	CDS	AGTAAA	-1.17459	0.44705	1	N	Not Sig	ncbiRefSeq	adenylate cyclase 2 [Source:RGD Symbol;Acc:619965]	GGAGAACGTGCTTCCTGCACACGTGGCTGAACACTTCCTGGCCAGGAGCCTGAAAAATGA
chr1	Adcy2	+	34783103	CDS	AACAAG	-0.132178	0.941608	1	N	Not Sig	ncbiRefSeq	adenylate cyclase 2 [Source:RGD Symbol;Acc:619965]	GTCAGATGTGAACAAGGAAGGCTTGGAATGCCTGCGGCTCCTGAATGAGATCATTGCTGA
chr1	Adcy2	+	34822234	3UTR	ATTAAA	-0.0975962	0.946014	1	N	Not Sig	ncbiRefSeq	adenylate cyclase 2 [Source:RGD Symbol;Acc:619965]	TCTGATGTTTTGATGCCATTTGTCTTTTGTAAGGTTAATTCATTAAAAGTTTTATGTACT
chr1	Add3	+	252255123	3UTR	AATAAA	0.0977695	0.772241	1	N	Not Sig	ncbiRefSeq	adducin 3 [Source:RGD Symbol;Acc:2043]	TTATGCTAATTAATGTTAAATCACAATAAACAGTATTTTAAATATATGCATTTGGTATAA
chr1	Adgra1	+	194673253	3UTR	AATACA	-0.188314	0.579484	1	N	Not Sig	ncbiRefSeq	adhesion G protein-coupled receptor A1 [Source:RGD Symbol;Acc:1308241]	CATGCTGTGTACGTACTGTAGATACAGACCATCCAGAGGAAAATACAGTGTTTTACATTG
chr1	Adgrg6	-	8812888	unassigned	CATAAA	-0.709973	0.320259	1	N	Not Sig	ncbiRefSeq	adhesion G protein-coupled receptor G6 [Source:RGD Symbol;Acc:1308551]	AATAATGTTTTTCCCTATTTAAGAGGCAGAAATAGAAACACTCCCTCATAAAGGAACTGA
chr1	Adm	+	164747653	3UTR	AATAAA	0.236556	0.900968	1	N	Not Sig	ncbiRefSeq	adrenomedullin [Source:RGD Symbol;Acc:2047]	TAATCTATTTACATAAAATATGTGATCTGGGAAAAAGCAAACCAATAAACTGTCTCAATG
chr1	Aen	+	132824520	3UTR	AGTAAA	0.0427682	1	1	N	Not Sig	ncbiRefSeq	apoptosis enhancing nuclease [Source:RGD Symbol;Acc:1305051]	TACTGTGAGAAATCAGCTTGTTTGTGCTTCCAGAGGAGTAAAGGAATAAGTGCAACTGGA
chr1	Afap1l2	-	255964237	unassigned	CATAAA	-0.35785	0.60489	1	N	Not Sig	ncbiRefSeq	actin filament associated protein 1-like 2 [Source:RGD Symbol;Acc:1310668]	TCAGTGTGTAAATAAGATGTTTGCCCCGTGCCGTCCCATAAAATACAAGGGAAACCCAAA
chr1	Afdn	+	54034216	3UTR	ATTAAA	-0.465248	0.336962	1	N	Not Sig	ncbiRefSeq	afadin, adherens junction formation factor [Source:RGD Symbol;Acc:708561]	AGCATTCCTTTTTCCCATTTCCATCTTTCACTCCTTCATTAAACTGCTGAGTCATTCCTT
chr1	Agpat4	-	48525130	unassigned	CATAAA	0.881412	0.2146	1	N	Not Sig	ncbiRefSeq	1-acylglycerol-3-phosphate O-acyltransferase 4 [Source:RGD Symbol;Acc:619916]	GATCAATCTTTCAGACCGACCCCCCGCCACCCACTGAGCATAAAGAAAGATGCAGATGTT
chr1	Agpat4	-	48525979	3UTR	none	0.186176	0.740855	1	N	Not Sig	ncbiRefSeq	1-acylglycerol-3-phosphate O-acyltransferase 4 [Source:RGD Symbol;Acc:619916]	GTGGGAACTCAGCCTCCCCTGCACTGTCTACTCTGGTACACAAAAAACCCAGAATGTGGT
chr1	Agpat4	-	48527321	3UTR	CATAAA	0.0650347	0.932338	1	N	Not Sig	ncbiRefSeq	1-acylglycerol-3-phosphate O-acyltransferase 4 [Source:RGD Symbol;Acc:619916]	CCCAAAGCCAGGGAAGAGTGGGGGTGGGGGGTAGCAGATTTGTGTAAATACTTGCCACAG
chr1	Ahnak	+	205912215	3UTR	AATAAA	0.204752	0.682404	1	N	Not Sig	ncbiRefSeq	AHNAK nucleoprotein [Source:RGD Symbol;Acc:619779]	TAATGGAGAATGTATGAAAGTCCATGCTGTACAAGCCAAATAAAGCTCTTTATTAACCCT
chr1	Ahnak	+	205912348	3UTR	none	0.688942	0.812063	1	N	Not Sig	ncbiRefSeq	AHNAK nucleoprotein [Source:RGD Symbol;Acc:619779]	CAGACTCGATCCATCCAATGCTATCGTTAGTTTTGTGAGTGATGTTAAGGCATTACCTCT
chr1	Ahnak	+	205970930	exon	AATAAA	1.03893	0.899771	1	N	Not Sig	ncbiRefSeq	AHNAK nucleoprotein [Source:RGD Symbol;Acc:619779]	TTTGGCAGCTATGGGTGTAGGGACTCTCTACTTATCCACCCAATAAACGTGTGTCAAGCA
chr1	Ahsp	+	182885507	3UTR	AATAAA	0.688942	0.998887	1	N	Not Sig	ncbiRefSeq	alpha hemoglobin stabilizing protein [Source:RGD Symbol;Acc:1306725]	CTTCAGACCATTCTCCCATGATGTCGTTGTATTTTGACATGCCAATAAAGACTGATACTA
chr1	Aig1	-	8046429	unassigned	none	-0.218054	0.653753	1	N	Not Sig	ncbiRefSeq	androgen-induced 1 [Source:RGD Symbol;Acc:1562920]	GCAAGAACAGGCACTTCAACCGCGCTGTTAAGGCTCTGAGACGGACAATGCAGACACAAG
chr1	Aig1	-	8046724	3UTR	AATATA	1.26205	0.388831	1	N	Not Sig	ncbiRefSeq	androgen-induced 1 [Source:RGD Symbol;Acc:1562920]	GCCTCCACCCACATCTGCCCCTCCAATCTTATCATATTCCTCAATAAGAAATATATTTGA
chr1	Aip	-	201407286	3UTR	none	0.124644	0.687246	1	N	Not Sig	ncbiRefSeq	aryl-hydrocarbon receptor-interacting protein [Source:RGD Symbol;Acc:628619]	TGGCCAGGGGCAAGACTCGAAGCATCAGCCTCAAGCTAGACAGTGAAGAGTGAGCAAACC
chr1	Aip	-	201408001	3UTR	none	0.0688339	0.96949	1	N	Not Sig	ncbiRefSeq	aryl-hydrocarbon receptor-interacting protein [Source:RGD Symbol;Acc:628619]	CACTGACTACCAAGCACCTGGCCACTGAGGACCAGCCTTCAGGACGGATTAGCTCTGCAA
chr1	Ak3	-	226737471	unassigned	none	0.0689782	0.668039	1	N	Not Sig	ncbiRefSeq	adenylate kinase 3 [Source:RGD Symbol;Acc:619885]	GAAAGCCTTTTGACTATGTTTCAAAAGCTGGAGATGAAGATCAAAATGCAAACAGCCTGA
chr1	Akap12	+	40819860	3UTR	AATAAA	-0.0168192	0.960847	1	N	Not Sig	ncbiRefSeq	A-kinase anchoring protein 12 [Source:RGD Symbol;Acc:70988]	TTATGTTCCTTTGGATAAATTGTGATTTGACAACTGATTTAAATAAACATATTTGCCTCA
chr1	Akap13	+	129619645	3UTR	AATAAA	-0.0797078	0.80181	1	N	Not Sig	ncbiRefSeq	A-kinase anchoring protein 13 [Source:RGD Symbol;Acc:727893]	TCCGAGTCTTGTAAAGTCCCCCTCAGACCTTTCAGAAATAATAAATGTCCTTTGAAATCT
chr1	Akap7	+	20217799	3UTR	AATAAA	-0.161033	0.619687	1	N	Not Sig	ncbiRefSeq	A-kinase anchoring protein 7 [Source:RGD Symbol;Acc:1303071]	TGTATTCCTTTATACGTACCTACGTTTTCATGCGTCATAATAAAAGTACTCTTTCCTCTA
chr1	Akip1	+	163742832	3UTR	AATAAA	0.0749353	0.955664	1	N	Not Sig	ncbiRefSeq	A-kinase interacting protein 1 [Source:RGD Symbol;Acc:1306959]	TGACATCACTGCCATCATTTCACTCTAAGAAGAAGAATAAAACCACCCTATAACTGTCTT
chr1	Akip1	+	163743646	intron	none	-2.23386	0.0599543	1	N	Not Sig	ncbiRefSeq	A-kinase interacting protein 1 [Source:RGD Symbol;Acc:1306959]	GAGAAAAAAACCTTAATTCATATATGCTGACTGTAATTTTAAAGATTTTTGCTTTGTGTT
chr1	Akt1s1	+	95339676	3UTR	ATTAAA	0.254807	0.546032	1	N	Not Sig	ncbiRefSeq	AKT1 substrate 1 [Source:RGD Symbol;Acc:1312049]	GGGAGAGTGGGATGGGGATCGGGAAGGGCGCTCTGAGATTAAAGTTTTACCTCTGACTGG
chr1	Akt2	+	82933826	3UTR	AATAAA	0.0331455	0.938551	1	N	Not Sig	ncbiRefSeq	AKT serine/threonine kinase 2 [Source:RGD Symbol;Acc:2082]	GGCCTTTCCTTACTCCTCATATTTGTACGGTACAAGCAATAAAGACACTCATTTCAGACC
chr1	Aldh16a1	-	95626726	unassigned	none	0.655972	0.614359	1	N	Not Sig	ncbiRefSeq	aldehyde dehydrogenase 16 family, member A1 [Source:RGD Symbol;Acc:1566295]	AGTGCTCTCCCAGGGCTGCCTACCGGGCCACACAAGAAGCCACTGTTCCCACACCCTCAA
chr1	Aldh18a1	-	239375656	unassigned	AATAAG	0.0688525	0.899329	1	N	Not Sig	ncbiRefSeq	aldehyde dehydrogenase 18 family, member A1 [Source:RGD Symbol;Acc:1311431]	AAGGGTCACCAGAGAGGGAGAGGGGAGACAACGGTAAGGACAAATAAGGGAGAAAACTTT
chr1	Aldh1a1	+	218152962	3UTR	AATAAA	0.825486	0.203727	1	N	Not Sig	ncbiRefSeq	aldehyde dehydrogenase 1 family, member A1 [Source:RGD Symbol;Acc:2087]	TTTGTTGGTCTGTAATTATTTGGGAATCAACTAGGATTATGGCAATAAACTCTGCTGGTC
chr1	Aldh3b1	-	201145308	unassigned	none	0.141078	0.657299	1	N	Not Sig	ncbiRefSeq	aldehyde dehydrogenase 3 family, member B1 [Source:RGD Symbol;Acc:1359546]	GGATCTTAGTCTTACCATGGAGGCAGCACATGCACTCCAAAAGAGACAAGACACCTGTAG
chr1	Aldh3b2	+	201264699	3UTR	AATAAA	0.358948	0.429749	1	N	Not Sig	ncbiRefSeq	aldehyde dehydrogenase 3 family, member B2 [Source:RGD Symbol;Acc:1584166]	ATCCATGTAGGCAGAATATATATACATGGAAAATAAAATAACAAAATCTTGAAAAAATGG
chr1	Aldoa	-	181402274	unassigned	AACAAA	0.00439774	0.9033	1	N	Not Sig	ncbiRefSeq	aldolase, fructose-bisphosphate A [Source:RGD Symbol;Acc:2089]	AGTGAAGCTCTTTCCTCAGGCCCTCCCTCATACCCTACAAGACATGAACAACAAACAGAC
chr1	Alg8	+	151704307	3UTR	AATAAA	-0.0124645	0.986004	1	N	Not Sig	ncbiRefSeq	ALG8, alpha-1,3-glucosyltransferase [Source:RGD Symbol;Acc:1305468]	GCATAATTAGATTCTGTTCCTAAGGAGATATAAATAAAATGTCATTTTATATTTGCAGAA
chr1	Alkbh6	+	85568977	3UTR	AATAAA	0.964377	0.0149269	0.60116	N	Not Sig	ncbiRefSeq	alkB homolog 6 [Source:RGD Symbol;Acc:1566318]	AGTAACTGTGGAAACCACGGAGAAGTCACCATTCCAAATAAACAGAAAATACCTTTATTC
chr1	Ampd3	+	164925393	CDS	ATTACA	0.982258	0.898728	1	N	Not Sig	ncbiRefSeq	adenosine monophosphate deaminase 3 [Source:RGD Symbol;Acc:2111]	CTACACAAGGGATTACACGTCTCTCTCTCTACTGATGACCCCATGCAGTTCCACTACACC
chr1	Ampd3	+	164927213	intron	none	0.643635	0.983946	1	N	Not Sig	ncbiRefSeq	adenosine monophosphate deaminase 3 [Source:RGD Symbol;Acc:2111]	GCTAGGGAGTTGAGGAAAGCCATGGAGAAAGTGCTTTTTGTGTTGCAAGGTGGAAGAGTT
chr1	Ampd3	+	164929896	3UTR	AATAAA	0.303231	0.597837	1	N	Not Sig	ncbiRefSeq	adenosine monophosphate deaminase 3 [Source:RGD Symbol;Acc:2111]	TTTCATTGTATCAAATACTTTTTTAAAGACTACAAATAAAGTCTGTTAGGACTGTGACCC
chr1	Anapc15	+	156266004	3UTR	AATAAA	-0.0348463	0.891935	1	N	Not Sig	ncbiRefSeq	anaphase promoting complex subunit 15 [Source:RGD Symbol;Acc:1311634]	TGCCAGGTGTGGTCCCTTTCTATCCCTCTTTAATAAAGACACAGGACTGATTCTTTCCCC
chr1	Ankrd13d	-	201565711	unassigned	AATAAT	-0.0620232	1	1	N	Not Sig	ncbiRefSeq	ankyrin repeat domain 13D [Source:RGD Symbol;Acc:1309156]	CTATCCATCAATAATCCCCCATCCAGTGTCCCTTGGTTCCAGTCCACGGAGGACAGCAAG
chr1	Ankrd27	+	88303613	3UTR	AGTAAA	0.0375446	0.941945	1	N	Not Sig	ncbiRefSeq	ankyrin repeat domain 27 [Source:RGD Symbol;Acc:1307106]	TGCCAAATGATGGAAAAGAAAACAGTAAACTTTGACTCTTGATTGTGTCCTGCCATTTTT
chr1	Ankrd42	-	146648079	unassigned	AGTAAA	-0.283949	0.763369	1	N	Not Sig	ncbiRefSeq	ankyrin repeat domain 42 [Source:RGD Symbol;Acc:1310789]	GGTCAAAACTCTTTAAGATCATGCATATTAGTAGTAGTATATCTAGACAGTAAAATACAA
chr1	Ankrd42	-	146654897	intron	AATACA	-0.613217	0.661178	1	N	Not Sig	ncbiRefSeq	ankyrin repeat domain 42 [Source:RGD Symbol;Acc:1310789]	GAGGAAAGATCCCTTGGAATTCACAGGTACTAAATACAAAGCAATGGTTTTAAGGACATT
chr1	Anks4b	+	174557796	3UTR	AATAAA	1.2739	0.733973	1	N	Not Sig	ncbiRefSeq	ankyrin repeat and sterile alpha motif domain containing 4B [Source:RGD Symbol;Acc:1584204]	TGATAGCAGTTTGGGCTTTCAACCTCCTGAGAAGTGAAAAATAAATGTCTATTGTTTGAG
chr1	Ano1	-	199751438	unassigned	none	-1.17432	0.326483	1	N	Not Sig	ncbiRefSeq	anoctamin 1 [Source:RGD Symbol;Acc:1310786]	CAGGGCTCATCAGAGCTCAGGACAGGGGCAGGTTGGGAGAAGAGCAGTCGGAAGAGGCCA
chr1	Anpep	-	133767331	unassigned	none	-0.476438	0.642875	1	N	Not Sig	ncbiRefSeq	alanyl aminopeptidase, membrane [Source:RGD Symbol;Acc:2991]	TCTCCAGCTCTCATAACCATTGTATCAATCTCATGTTCCCACTGAGTGACAAGTCTGTAA
chr1	Anxa1	-	217861174	unassigned	AAGAAA	-1.32598	0.176935	1	N	Not Sig	ncbiRefSeq	annexin A1 [Source:RGD Symbol;Acc:2118]	CGCCATTAGATATATACACACACAAAAGAAAATCATGAAAGGAGAAACAATGACACACCA
chr1	Ap2a1	-	95384302	3UTR	AATAGA	0.529107	0.208911	1	N	Not Sig	ncbiRefSeq	adaptor related protein complex 2 subunit alpha 1 [Source:RGD Symbol;Acc:1306254]	ACTCTACAAGCCCTCACCCCGCTCCTTTGATCACTTAGGGTGGGCAGTCAATAGATGGGG
chr1	Ap2a2	+	196725608	3UTR	AATAAA	0.0149275	0.858823	1	N	Not Sig	ncbiRefSeq	adaptor related protein complex 2 subunit alpha 2 [Source:RGD Symbol;Acc:71015]	TAGTCCAGTGTGCTTGTTCTCAGAGAAAAAAAAAAAATAAATGCTAGGACAGGAAACTGG
chr1	Ap2s1	+	77428902	3UTR	AATAAA	1.02088	0.0486358	1	N	Not Sig	ncbiRefSeq	adaptor related protein complex 2 subunit sigma 1 [Source:RGD Symbol;Acc:620188]	TTATTGTGTGATGCTGTGAGTGTGCGTGTGTGCAGCCCCCAATAAACCTGTGGTCCTGCC
chr1	Ap3b2	-	135412579	unassigned	none	0.0720724	0.921686	1	N	Not Sig	ncbiRefSeq	adaptor related protein complex 3 subunit beta 2 [Source:RGD Symbol;Acc:1308950]	TCAAACAGTCACTCGTGGTAAATCTTTCCCCAAACACCTTAGAAGGAAGGTGAGCCAGAA
chr1	Ap3s2	-	133818824	unassigned	none	-0.0776082	0.686625	1	N	Not Sig	ncbiRefSeq	adaptor related protein complex 3 subunit sigma 2 [Source:RGD Symbol;Acc:1586888]	AGTGGGTTTCTGAGCAAGTGTGTATGTGGGGAGTTCATCATTCACAAAACAGCACTGAAC
chr1	Ap5b1	+	202880301	3UTR	AATAAA	-0.351992	0.653312	1	N	Not Sig	ncbiRefSeq	adaptor related protein complex 5 subunit beta 1 [Source:RGD Symbol;Acc:1562657]	TATCTGAAGACAGCTACAGTGTACTCATATGTAATAAATGAATAAATTTAAAAAAAAAAA
chr1	Apba1	+	221569496	3UTR	AATAAA	0.019634	0.828837	1	N	Not Sig	ncbiRefSeq	amyloid beta precursor protein binding family A member 1 [Source:RGD Symbol;Acc:620844]	ACTGAACGCTAATGTCTGTATAAGAATTGCTGGAACAATAAACAAGGACTTCACCCCCTT
chr1	Apba2	+	118286855	3UTR	AATAAA	-0.22869	0.711997	1	N	Not Sig	ncbiRefSeq	amyloid beta precursor protein binding family A member 2 [Source:RGD Symbol;Acc:620845]	TGCAGCTGACCCTAGGAAGACTTCGTGCATATTGCTAATAAACCTGAAGTCATGATCAAA
chr1	Apbb1	-	159896888	unassigned	none	-0.0236216	0.808148	1	N	Not Sig	ncbiRefSeq	amyloid beta precursor protein binding family B member 1 [Source:RGD Symbol;Acc:2122]	GGCAAAGGAAGCTTGGTAGGTAGCAAGATCTTGACTGAAGAGTTGACATGGCCACAAGAC
chr1	Aplp1	-	85696879	unassigned	none	0.0415556	0.587929	1	N	Not Sig	ncbiRefSeq	amyloid beta precursor like protein 1 [Source:RGD Symbol;Acc:69257]	GTTTAAAAACCTTCAAGAAGTGCTTGTGCTTACACACAGTTTCTCCAACAGAAACACGGG
chr1	Apobr	+	181173209	3UTR	AATAAA	-0.0165955	0.916765	1	N	Not Sig	ncbiRefSeq	apolipoprotein B receptor [Source:RGD Symbol;Acc:1565169]	ACTCAAGGACGAAACAATAAATAAACCATTTCCTAAAAATAAATAAATATCCAAGAAATA
chr1	Apoc1	-	79347056	unassigned	none	0.195635	0.619327	1	N	Not Sig	ncbiRefSeq	apolipoprotein C1 [Source:RGD Symbol;Acc:2134]	ACCCAGATTCCACCTTCTCCCTCAGCTCCCACCCGAGTCAAAGCACTTCAGGAAGCATTT
chr1	Apoc2	-	79329428	unassigned	AAGAAA	0.254496	0.891896	1	N	Not Sig	ncbiRefSeq	apolipoprotein C2 [Source:RGD Symbol;Acc:2135]	ACTAGATCCAAAGACCCTCCATCTTGGCTCTGGGAACCCCAGAAAAGAAGCCACACGGAT
chr1	Apoc4	-	79335744	unassigned	none	0.0272557	1	1	N	Not Sig	ncbiRefSeq	apolipoprotein C4 [Source:RGD Symbol;Acc:70959]	TAGATATGATGGAAGGTTGACCTCTGGCCTCAAGAGGAGCTATGCATCCGGTGACACAGA
chr1	Apoe	-	79353923	unassigned	GATAAA	0.153388	0.303341	1	N	Not Sig	ncbiRefSeq	apolipoprotein E [Source:RGD Symbol;Acc:2138]	CAGGCAGAAACGATAAACTGAGGCTGAAGCTGTGTGGAATCACTCACAGAGACTCAGAAC
chr1	Aqp11	-	152046514	unassigned	none	-0.179227	0.73596	1	N	Not Sig	ncbiRefSeq	aquaporin 11 [Source:RGD Symbol;Acc:628763]	ACTGCCCCTCCCCCGCCTGACTTTATTTTCTCTTGTTCTTTTCATCACAGTTAATACTGA
chr1	Arap1	+	155803170	CDS	none	-0.601355	0.775859	1	N	Not Sig	ncbiRefSeq	ArfGAP with RhoGAP domain, ankyrin repeat and PH domain 1 [Source:RGD Symbol;Acc:1310385]	CGGATGGTCAGGACTACAAGGCGGGCAAGGTGGTAGAAGACCTCATCAGCCATTATGTGG
chr1	Arap1	+	155814186	3UTR	TATAAA	0.168859	0.851256	1	N	Not Sig	ncbiRefSeq	ArfGAP with RhoGAP domain, ankyrin repeat and PH domain 1 [Source:RGD Symbol;Acc:1310385]	CATCCCTTCCCCACTTTGGATACTTTTTGATAATATAAATATATCTGTATATTTTACCCT
chr1	Arfip2	-	159974254	unassigned	AATAAA	-0.159498	0.720727	1	N	Not Sig	ncbiRefSeq	ADP-ribosylation factor interacting protein 2 [Source:RGD Symbol;Acc:1303204]	ATTCTCAGAATCATTGCATTATGGAAAAACAGCTTTGGTAGAATACAATAAAAATTGTAC
chr1	Arfip2	-	159975654	3UTR	none	0.289177	0.440589	1	N	Not Sig	ncbiRefSeq	ADP-ribosylation factor interacting protein 2 [Source:RGD Symbol;Acc:1303204]	CTGGGCATTTCTTACCAATCCACCCTCCTCTACTCCCCCACAAATTGACCTCACTGGGCC
chr1	Arfip2	-	159977161	CDS	none	0.231777	0.729538	1	N	Not Sig	ncbiRefSeq	ADP-ribosylation factor interacting protein 2 [Source:RGD Symbol;Acc:1303204]	GCTTTTTGACCCATGCCAGCCAACTTCCCAAACCTTGGGCCCACACCTGGCAGCCTCATA
chr1	Arg1	+	20488420	3UTR	AATAAA	0.40242	0.406221	1	N	Not Sig	ncbiRefSeq	arginase 1 [Source:RGD Symbol;Acc:2150]	ACGAGGCCTGCATCCACGTCGTTCAAAACATGTGATTTTTGTAATAAACTCTTTATAATA
chr1	Arhgap17	-	177807578	unassigned	AATACA	-0.184164	0.887276	1	N	Not Sig	ncbiRefSeq	Rho GTPase activating protein 17 [Source:RGD Symbol;Acc:628767]	CACACACACACACACAAATACACATGTATATAACCAGAGTTTGCCCCCAAGAATTAGCAA
chr1	Arhgap18	-	18403530	unassigned	AATAAT	0.736753	0.697666	1	N	Not Sig	ncbiRefSeq	Rho GTPase activating protein 18 [Source:RGD Symbol;Acc:1305053]	TAAACAGACAAAAGTAGACTCATGAACATGCCCCTGCAAAAACAATAATTCTAGGAGAAG
chr1	Arhgap19	-	240580865	intron	none	-0.649694	0.579594	1	N	Not Sig	ncbiRefSeq	Rho GTPase activating protein 19 [Source:RGD Symbol;Acc:1593044]	CTTAGGACAAGAAGCTACCTTCAAAGCAACGGGGGCCAAAAAACCAGTCAGAACCCACAG
chr1	Arhgap33	-	85776111	3UTR	none	0.0886847	0.779644	1	N	Not Sig	ncbiRefSeq	Rho GTPase activating protein 33 [Source:RGD Symbol;Acc:2318374]	CTCAATGTTTGCCTCAAAGCCAAGAGCATGGAAAATCCCCAGTTTGTCTTCATTCACTGG
chr1	Arhgap35	-	77202435	unassigned	none	-0.272585	0.597334	1	N	Not Sig	ncbiRefSeq	Rho GTPase activating protein 35 [Source:RGD Symbol;Acc:1308738]	GGGAGTAGGGTCACCCCCACTCGGCCCCAGGCTGCTTTGGAGACTGCAGCCCTTCATTTC
chr1	Arhgap35	-	77202965	3UTR	AATACA	-0.10335	0.362799	1	N	Not Sig	ncbiRefSeq	Rho GTPase activating protein 35 [Source:RGD Symbol;Acc:1308738]	AAAGATCATTTAACATGTGAAAATACAAGTACCAGAAAAATAAGCCGACAACAGCACTAT
chr1	Arhgef1	+	80518029	CDS	none	-0.0464038	1	1	N	Not Sig	ncbiRefSeq	Rho guanine nucleotide exchange factor 1 [Source:RGD Symbol;Acc:620951]	CGCTGACACCCACACCCGACGGCAAGACCATGCTGCGGCCTGTGCTCCGGCTCACCTCTG
chr1	Arhgef1	+	80520954	3UTR	AATATA	-0.404192	0.628682	1	N	Not Sig	ncbiRefSeq	Rho guanine nucleotide exchange factor 1 [Source:RGD Symbol;Acc:620951]	CCTTTGCTGTTTTTATATCCTGAATTGGAGGTTTATTTTTAATATATATTATCTAAGGTG
chr1	Arhgef17	-	155230606	unassigned	none	-0.11717	0.932526	1	N	Not Sig	ncbiRefSeq	Rho guanine nucleotide exchange factor 17 [Source:RGD Symbol;Acc:1309890]	AGTTCAAGGTCATCCTCAGCTAGATACTGCCCTAAAAAAGCAAAAAAGACACAGCCGTGT
chr1	Arhgef17	-	155232982	3UTR	none	-0.0530422	0.983862	1	N	Not Sig	ncbiRefSeq	Rho guanine nucleotide exchange factor 17 [Source:RGD Symbol;Acc:1309890]	CCCTCGTCCTTGGGGAGACAGCTGGCAGGAAGCCGTGATGGCCAGGGCCGGGGGAGCCAT
chr1	Arid1b	+	45923644	3UTR	AATAAA	-0.0903717	0.876057	1	N	Not Sig	ncbiRefSeq	AT-rich interaction domain 1B [Source:RGD Symbol;Acc:708504]	AATCTTTATATGTCCCACATGTTAAGAATAAATGTACATTAAATCTTGTTACGCACTGTG
chr1	Arl2	-	203434128	unassigned	ATTAAA	0.172694	0.780947	1	N	Not Sig	ncbiRefSeq	ADP-ribosylation factor like GTPase 2 [Source:RGD Symbol;Acc:69326]	CCTTCTGCTCTGCTCGGTCCCCTCTGGACTCAGCATTCCAGGTGAGCATTAAAGTCATGA
chr1	Arl3	-	245400658	unassigned	none	0.113862	0.7082	1	N	Not Sig	ncbiRefSeq	ADP ribosylation factor like GTPase 3 [Source:RGD Symbol;Acc:69327]	TGCAGTGCAAGGCCTTGTTCCTTTCTAATCCTGTGCTCTAAGACATCTAACACTATTTCA
chr1	Arl6ip1	-	172430474	unassigned	CATAAA	0.0746525	0.898962	1	N	Not Sig	ncbiRefSeq	ADP-ribosylation factor like GTPase 6 interacting protein 1 [Source:RGD Symbol;Acc:735205]	TGGGAGTTCACTAGTCAGATTCATAAACTCAAAAGTTAACAAAGGAAGTGAGACAAATAG
chr1	Arl6ip1	-	172430583	3UTR	ATTAAA	-0.65206	0.0206529	0.742194	N	Not Sig	ncbiRefSeq	ADP-ribosylation factor like GTPase 6 interacting protein 1 [Source:RGD Symbol;Acc:735205]	AAGTAGAAGAAATGATTAAAACTGCCAAAGTAGTTAACTAGTAGAACATGTATTAGTCTC
chr1	Armc5	+	182826912	3UTR	ATTAAA	-0.0557807	1	1	N	Not Sig	ncbiRefSeq	armadillo repeat containing 5 [Source:RGD Symbol;Acc:1306553]	CCAGGGGCTGGCCTGACTCAGCACTATGGTATTGAAATTAAAAACCTGAGATTTGGACAC
chr1	Armh3	-	244666249	unassigned	ACTAAA	-0.0561181	0.898908	1	N	Not Sig	ncbiRefSeq	armadillo-like helical domain containing 3 [Source:RGD Symbol;Acc:9299787]	CTTTATGACACAGGACCAATCTGCATTTAGGAGACGAAGAGGGGAAAGACACTAAAGAGA
chr1	Armh3	-	244667005	3UTR	none	0.782874	0.286951	1	N	Not Sig	ncbiRefSeq	armadillo-like helical domain containing 3 [Source:RGD Symbol;Acc:9299787]	CGTGGAGGGGAGCTCATCTAGGCTCCCACTGGAGGGGTGGGTGGGGAGGGGGGAGCTGCT
chr1	Armt1	+	40918302	3UTR	AATAAA	-0.0720023	0.718001	1	N	Not Sig	ncbiRefSeq	acidic residue methyltransferase 1 [Source:RGD Symbol;Acc:1305235]	ATTGGAAATAAAGTTGAAATGCTTTCTGTACTGGAATAATAAAATGAATTTTACAGAGAA
chr1	Arnt2	-	138236234	unassigned	none	-0.142383	0.777319	1	N	Not Sig	ncbiRefSeq	aryl hydrocarbon receptor nuclear translocator 2 [Source:RGD Symbol;Acc:2154]	CCCAGTTTCCCAGGGGTAGGTTCCTTTCAAGTTGATCAATTACCAAGCTAGTCCAAGGCA
chr1	Arntl	+	167430232	3UTR	AATAAA	-0.0400888	1	1	N	Not Sig	ncbiRefSeq		TGGGTTAAAGTATAATGTATTAGACAGTTAAATATTTTTAATAAATGTTTCCCTTGTTCT
chr1	Arpin	-	133864287	unassigned	AACAAA	-0.019587	0.969909	1	N	Not Sig	ncbiRefSeq	actin-related protein 2/3 complex inhibitor [Source:RGD Symbol;Acc:1311021]	GTTCTCCAAGTACAAAACAACAAAAACAGTCATACGAAAAAAATATGGTCCAGGACCTGT
chr1	Arpin	-	133865176	3UTR	none	0.513148	0.57433	1	N	Not Sig	ncbiRefSeq	actin-related protein 2/3 complex inhibitor [Source:RGD Symbol;Acc:1311021]	TTGGAGGACTCACCCAGTACATGTCCACCACCTAGGGAAAGGAACACAGGAGACAATAGG
chr1	Arrb1	+	153894155	intron	none	-0.759998	0.635236	1	N	Not Sig	ncbiRefSeq	arrestin, beta 1 [Source:RGD Symbol;Acc:2156]	CACTTGAGCAGAGAAGGGAGTGTGGGGGCCGGTGACTCTGTCTGTCTTTCTCCCCATCCA
chr1	Arrb1	+	153909577	3UTR	ATTAAA	-0.0328592	0.975299	1	N	Not Sig	ncbiRefSeq	arrestin, beta 1 [Source:RGD Symbol;Acc:2156]	GGACAAATGAGCAAAAGAACCTTGAACAAGAGGCCATTAAAGGCCTTTTGTGATGGAGGA
chr1	Arrb1	+	153910174	3UTR	TATAAA	0.0149967	0.961712	1	N	Not Sig	ncbiRefSeq	arrestin, beta 1 [Source:RGD Symbol;Acc:2156]	TGAATACGATCAATTTTTTATAAAATTGATTATGTGATGGACACTCGTTTTTTATATTCC
chr1	Arrb1	+	153912111	3UTR	none	0.655153	0.383273	1	N	Not Sig	ncbiRefSeq	arrestin, beta 1 [Source:RGD Symbol;Acc:2156]	ACACACACACACACACACACACACACACACACACACACAGACATGCACCGTGACTAGCAC
chr1	Arrdc4	-	122369354	unassigned	AACAAA	-1.2744	0.0597538	1	N	Not Sig	ncbiRefSeq	arrestin domain containing 4 [Source:RGD Symbol;Acc:1311763]	TCTAGGATGATTTAACTCAGTCTTTGAAGTCAACACAGGAACAAAAAATGAGCTACCCAG
chr1	As3mt	+	245627858	3UTR	AATAAA	0.138873	0.899142	1	N	Not Sig	ncbiRefSeq	arsenite methyltransferase [Source:RGD Symbol;Acc:621325]	TTTTTCCCTGTAAATGAATGAAAATGAAAACAAATGAAAAATAAATTTGACTTCATCCTG
chr1	Asah2	-	229865661	unassigned	ATTACA	-0.0556088	0.910273	1	N	Not Sig	ncbiRefSeq	N-acylsphingosine amidohydrolase 2 [Source:RGD Symbol;Acc:69410]	TCTTCTATCTCGTCTTCAGAAGTCTGCATTACCTCTCATTACAAATCACTGTCCCCAGAC
chr1	Asb7	-	120222834	unassigned	AAGAAA	-0.473411	0.491723	1	N	Not Sig	ncbiRefSeq	ankyrin repeat and SOCS box-containing 7 [Source:RGD Symbol;Acc:1305154]	ACCAAACACCTGGAGTTGTTAAGAAGTTAAGGCAGAGGAGAAAGAAAACACAAATTCACT
chr1	Ascl2	-	198148998	unassigned	none	-0.301797	0.711088	1	N	Not Sig	ncbiRefSeq	achaete-scute family bHLH transcription factor 2 [Source:RGD Symbol;Acc:2159]	ACTGCACCTGGGGAACACGGGCGACACAAGAGGGTGAGACGGGTAGAAGGCACTACAAAC
chr1	Aspdh	+	94960720	3UTR	AGTAAA	-0.482595	0.70729	1	N	Not Sig	ncbiRefSeq	aspartate dehydrogenase domain containing [Source:RGD Symbol;Acc:1310111]	TCCTCCCCTACCCTTGCTGTCACCTTGACTACTATGGGTCCCAGTAAACATCAGAATTCT
chr1	Asphd1	-	181552973	unassigned	none	0.36307	0.571982	1	N	Not Sig	ncbiRefSeq	aspartate beta-hydroxylase domain containing 1 [Source:RGD Symbol;Acc:1306636]	CCCTTGCCCCAAGCCCTAGCCTGGGATTGGTAACTGGGAAGGAAAGAGTCAGGACTTAGG
chr1	Asrgl1	-	206006102	unassigned	none	0.0178803	0.958741	1	N	Not Sig	ncbiRefSeq	asparaginase and isoaspartyl peptidase 1 [Source:RGD Symbol;Acc:708526]	GACCAAGAAGGGAGCTTGTATCTGTTCTGATCTTGGTCAATAGTGACGCCTAACCACACT
chr1	Asrgl1	-	206007106	3UTR	AACAAA	0.0760632	0.873957	1	N	Not Sig	ncbiRefSeq	asparaginase and isoaspartyl peptidase 1 [Source:RGD Symbol;Acc:708526]	TCAACCAAGCATTCATTGACTTATTGATCAAGGTAACAAAAGGAGGGACAGACTGCACAA
chr1	Atad1	-	230544226	unassigned	AATAAA	0.0974418	0.926715	1	N	Not Sig	ncbiRefSeq	ATPase family, AAA domain containing 1 [Source:RGD Symbol;Acc:1308570]	AATAGAATAAATCAATATTAAAATGTCTGCTATAAAAGTGTGAAATCTCAACTACAATAT
chr1	Atad1	-	230544594	3UTR	AATAAA	-0.0580318	0.752475	1	N	Not Sig	ncbiRefSeq	ATPase family, AAA domain containing 1 [Source:RGD Symbol;Acc:1308570]	AATAAATACACAAGAATTTAGTTTTCAAAGAAATAAAGCAAATAATAAAGCGGAAAGCAT
chr1	Ate1	-	184961547	unassigned	none	-0.335773	0.73585	1	N	Not Sig	ncbiRefSeq	arginyltransferase 1 [Source:RGD Symbol;Acc:1309335]	CCGTGGGATGTGTCTTAGTTAGGGTTTTACTGCTGTGAACAGACACCATGACAAAAGCAA
chr1	Ate1	-	184964079	3UTR	AAGAAA	0.305163	0.543009	1	N	Not Sig	ncbiRefSeq	arginyltransferase 1 [Source:RGD Symbol;Acc:1309335]	ATGGTTACAGGTATACATGGTGCTGGAACCATATGTCACTAAGAAATGGATGAAGAGAAG
chr1	Atf5	-	95295601	unassigned	none	0.121901	0.845291	1	N	Not Sig	ncbiRefSeq	activating transcription factor 5 [Source:RGD Symbol;Acc:628902]	TCTTTATGACTACCCCCAGACTCAGTCTCCCCAGTCCCCTCTCAAAGACAGACACACAGG
chr1	Atg2a	+	203562240	3UTR	AATAAA	-0.665226	0.385505	1	N	Not Sig	ncbiRefSeq	autophagy related 2A [Source:RGD Symbol;Acc:1589890]	TTAAGCTCCCTGAGCGTGTGGGTCAGTGTCTGCATGAAGTGGAATAAACTTGCCCACCGC
chr1	Atl3	+	204726359	3UTR	ATTAAA	-0.930274	0.181563	1	N	Not Sig	ncbiRefSeq	atlastin GTPase 3 [Source:RGD Symbol;Acc:1309871]	AATCGATGATGTTTCACTTTTGGGTTGTACATTTAATGGATTAAAGATCACACCACCACA
chr1	Atl3	+	204727360	3UTR	AGTAAA	0.407304	0.541117	1	N	Not Sig	ncbiRefSeq	atlastin GTPase 3 [Source:RGD Symbol;Acc:1309871]	TTTCTTTGTTGCATTTGTATATATAATGCACTGAAACTGAAGTAAAATTTTCGACATTAA
chr1	Atp10a	+	109730437	3UTR	AATAAA	-1.06956	0.582754	1	N	Not Sig	ncbiRefSeq	ATPase phospholipid transporting 10A (putative) [Source:RGD Symbol;Acc:1306150]	ATTGTTGTGTGTATTTCTTGCTAAAATCATCACAGGCAATAAACAACCCCCCACTTTGCA
chr1	Atp1a3	-	80572789	unassigned	none	-0.0254701	0.774882	1	N	Not Sig	ncbiRefSeq	ATPase Na+/K+ transporting subunit alpha 3 [Source:RGD Symbol;Acc:2169]	GCGCTGGCAGGGGGCACCCCATCTGCCCACAGCTCTGGCAGGCAAGTACAACACGCACAC
chr1	Atp2a1	-	181026605	3UTR	GATAAA	0.200386	0.899494	1	N	Not Sig	ncbiRefSeq	ATPase sarcoplasmic/endoplasmic reticulum Ca2+ transporting 1 [Source:RGD Symbol;Acc:621293]	GACACTAAGGTTTTTGTCCATAGGTACCCGAAATAGGCCCCAAGACATAAGGAAGCAAGG
chr1	Atp5mk	-	245973909	3UTR	AATAAA	0.145633	0.62201	1	N	Not Sig	ncbiRefSeq	ATP synthase membrane subunit K [Source:RGD Symbol;Acc:631426]	GCCTTTGTTGCATTTTGTACAGTTTTATATTTTTGATATCTTGTAAATAAAGACAACCAG
chr1	Atrnl1	+	257211766	3UTR	AATAAA	-0.316491	0.506027	1	N	Not Sig	ncbiRefSeq	attractin like 1 [Source:RGD Symbol;Acc:1563485]	CAGCTTATAAAGCATTTTACTGGAAATAAAATTCTTCGCCCCCGGGGGGAAGTGAACCAA
chr1	Atrnl1	+	257219289	3UTR	AATAAA	0.553878	0.728354	1	N	Not Sig	ncbiRefSeq	attractin like 1 [Source:RGD Symbol;Acc:1563485]	TGGGCCTTAATTTCTTTCATGTAAAAGCCTGTTTTAAAATAAATCTTAAAACAAGAAAAC
chr1	Atxn2l	-	181078292	unassigned	none	0.203808	0.627573	1	N	Not Sig	ncbiRefSeq	ataxin 2-like [Source:RGD Symbol;Acc:1565868]	CTACCTCCTTATGGAGGAGGGAAAAGTACTTTTGTTTTTAAGAATCAAACCTATAGGCAG
chr1	Aurkc	-	66843652	unassigned	none	0.258512	0.82852	1	N	Not Sig	ncbiRefSeq	aurora kinase C [Source:RGD Symbol;Acc:1309573]	TCACTCACCTCCGACCAAGGTTCAACCCAATCCACACACCAACTCACTCAAGCAAGAAGC
chr1	Aurkc	-	66845987	CDS	none	0.0688544	1	1	N	Not Sig	ncbiRefSeq	aurora kinase C [Source:RGD Symbol;Acc:1309573]	AGAGAGGGGGTATGCACAGACCACCCGAAGTCTGCGATCTTCACCTCGCCCTTGAGGCCC
chr1	Avpi1	-	240930235	unassigned	none	-0.34049	0.537707	1	N	Not Sig	ncbiRefSeq	arginine vasopressin-induced 1 [Source:RGD Symbol;Acc:621721]	CCTTCCCTATCTGGCTACGTCTGTTTTGAGATTCCCCTCTTCTGTAACAGACTGAGACAA
chr1	Axl	-	81265655	unassigned	none	0.169429	0.818406	1	N	Not Sig	ncbiRefSeq	Axl receptor tyrosine kinase [Source:RGD Symbol;Acc:620028]	AGGACCCATCTTCTTGGACCCAAAGCATCTTACTGTGCCTAAGATGAAGATCAGGCCAAC
chr1	B3gat3	+	205823926	exon	AATAAA	0.017708	0.970599	1	N	Not Sig	ncbiRefSeq	beta-1,3-glucuronyltransferase 3 [Source:RGD Symbol;Acc:1311968]	TCCTACCTCTAGAATAAAGAATCTCAACCCAGAGGGGCTTCATGGTTCCCCTCACTTGGC
chr1	B4galnt4	+	196182294	3UTR	AATGAA	-0.0457626	0.99057	1	N	Not Sig	ncbiRefSeq	beta-1,4-N-acetyl-galactosaminyl transferase 4 [Source:RGD Symbol;Acc:1310052]	CAAGAGTTCTGTCTGTTCTGTTTTTTATTCAGAATGAAATGAAATATTTTTTTTAGTTCT
chr1	B4gat1	+	202345490	3UTR	AATAAA	0.574205	0.0434303	1	N	Not Sig	ncbiRefSeq	beta-1,4-glucuronyltransferase 1 [Source:RGD Symbol;Acc:1309541]	GAGGTCGGGCTACTCATTTGCCTTCGGATGACAGTGTGTAAATAAACGAGTGTTACACCC
chr1	B9d2	+	81195381	3UTR	AATAAA	-0.0529643	1	1	N	Not Sig	ncbiRefSeq	B9 domain containing 2 [Source:RGD Symbol;Acc:1566122]	ACTGTCAGGGGCACTTAATAAAAGCATGCATTTCTCATAGGTAAGGTGTCCCCTCGTACC
chr1	Bad	+	204142826	3UTR	AATAAA	0.120355	0.755481	1	N	Not Sig	ncbiRefSeq	BCL2-associated agonist of cell death [Source:RGD Symbol;Acc:620103]	CTAGCTGGAGGCCCCAGGTCGGGAGAAACGTGCTTTATAATAAAGCCCGCGCATGTGTCG
chr1	Bag3	+	183126860	3UTR	AATAAA	0.0504502	0.774392	1	N	Not Sig	ncbiRefSeq	BAG cochaperone 3 [Source:RGD Symbol;Acc:1307794]	TGGCTTTAATGTTGTTACATTTCGGGGAGGGGGACAGAAAATAAAGCGATTGTATAAGTC
chr1	Banf1	-	202672169	unassigned	none	0.0890894	0.822129	1	N	Not Sig	ncbiRefSeq	BAF nuclear assembly factor 1 [Source:RGD Symbol;Acc:620662]	AATGGAAGGACCCAGTTTCGGTGTGCACCGTGTTCAGCAATGGAACACAACCCAGCCCGT
chr1	Banf1	-	202672394	3UTR	AAGAAA	-1.03284	0.0896263	1	N	Not Sig	ncbiRefSeq	BAF nuclear assembly factor 1 [Source:RGD Symbol;Acc:620662]	GCTGCCATGGAACTGTAGGGGGAGGGGAAGGGGAAGGCATGCGAGGGCAAGAAACCCAGA
chr1	Bax	-	95940000	unassigned	none	0.0225015	0.928459	1	N	Not Sig	ncbiRefSeq	BCL2 associated X, apoptosis regulator [Source:RGD Symbol;Acc:2192]	AGTGGAAGGTGGGCCTGGTGCCTGTGCTTGCTGCCAGCTGTGTGGACACTGGACCATATC
chr1	Bbip1	-	252943588	3UTR	none	-0.0631046	0.851136	1	N	Not Sig	ncbiRefSeq	BBSome interacting protein 1 [Source:RGD Symbol;Acc:6498801]	GTAAGAGTTGTCAGCACAGCTTTTCTTTTTTCTTTTTGTTTTTGTTATTGTTTTTTTTTT
chr1	Bbs1	-	202184811	unassigned	none	0.817709	0.233606	1	N	Not Sig	ncbiRefSeq	Bardet-Biedl syndrome 1 [Source:RGD Symbol;Acc:1307581]	TGGGATAGACTTGGGTGGTGTCTCGGTGAGGGTTCTCTAGAGTCACAGAATTTATGGCAT
chr1	Bbs1	-	202186118	exon	AATGAA	-0.0314017	0.836315	1	N	Not Sig	ncbiRefSeq	Bardet-Biedl syndrome 1 [Source:RGD Symbol;Acc:1307581]	CCCACACACATCTGAAAAGAATTTAAAATAGTTAATGAAAATGGCTGCTGTACAGGAATG
chr1	Bbs1	-	202187147	3UTR	none	1.33933	0.227574	1	N	Not Sig	ncbiRefSeq	Bardet-Biedl syndrome 1 [Source:RGD Symbol;Acc:1307581]	GGTTCCCAAGTGATTCAGAATAGTCTGGAGGGCCAGGGGTCCCAGCACTTGAGATCTAAA
chr1	Bcam	-	79415015	unassigned	none	-0.797874	0.560488	1	N	Not Sig	ncbiRefSeq	basal cell adhesion molecule (Lutheran blood group) [Source:RGD Symbol;Acc:68378]	CTCCTCCCTCCCTTCCCCTTTATCCTCCTCCCCTAGAAGAGAACCTGGCCATAGGAAAGT
chr1	Bcat2	+	96060007	3UTR	AATAAA	0.0825618	0.953938	1	N	Not Sig	ncbiRefSeq	branched chain amino acid transaminase 2 [Source:RGD Symbol;Acc:68948]	TTTTTTTTTTTCCGTCTCTCTCTCCTTGCTGCAATTTTGAAATAAAATGCCAAAGAACAA
chr1	Bccip	+	188524956	3UTR	AATAAA	0.0944242	0.825798	1	N	Not Sig	ncbiRefSeq	BRCA2 and CDKN1A interacting protein [Source:RGD Symbol;Acc:1307362]	AGAAAAGCGTGGAATAGTAATTTTAAGAACTTAATAAAAACTATTTTTTTATTTTAAAAT
chr1	Bckdha	-	81138945	unassigned	none	0.111805	0.784174	1	N	Not Sig	ncbiRefSeq	branched chain keto acid dehydrogenase E1 subunit alpha [Source:RGD Symbol;Acc:2196]	CACACACACACACACACCCCAGCCCCCAAACTTGACGAAACAGAGACCAGAGGAAGCAGA
chr1	Bckdk	+	182520006	3UTR	ATTAAA	-0.132021	0.722683	1	N	Not Sig	ncbiRefSeq		GAGTACTTATTTGACCTGCTGTTATTAAAGTTTGCATTTTGAATGCCCTCTTGGGCCTCA
chr1	Bcl2l12	-	95472271	unassigned	CATAAA	0.688942	1	1	N	Not Sig	ncbiRefSeq	Bcl2 like 12 [Source:RGD Symbol;Acc:1307361]	AACACACACATACATAAAAACACACACACACATAACATAATTTTTTAAAAGGACTTAGGG
chr1	Bcl2l12	-	95472787	exon	none	0.225897	1	1	N	Not Sig	ncbiRefSeq	Bcl2 like 12 [Source:RGD Symbol;Acc:1307361]	CACACACACACACACACACACACACACACACACACACACTCAAACACTTTAGTGCTCTAG
chr1	Bcl7c	-	182277162	unassigned	none	0.038926	1	1	N	Not Sig	ncbiRefSeq	BAF chromatin remodeling complex subunit BCL7C [Source:RGD Symbol;Acc:1308439]	GGGAGGGAGAGAGAGAGAGAGAGAGAGAGAGAGAGAGAAGAAGAAGAAGAAGAAGAAGAA
chr1	Bcl7c	-	182320331	intron	AGTAAA	-0.33805	0.998017	1	N	Not Sig	ncbiRefSeq	BAF chromatin remodeling complex subunit BCL7C [Source:RGD Symbol;Acc:1308439]	GAGCCAAAACTGTCTCCAAAGACCCTCCCCAGCCTTGACAGGGAAATGACATGACACAAA
chr1	Bclaf1	+	15115321	3UTR	AATAAA	0.903068	0.541496	1	N	Not Sig	ncbiRefSeq		GAAAATAGTAGACTGTATGTTGAAAATTGTACTGAAATAAAGTAGAAGACGTTCAATATC
chr1	Bclaf1	+	15117522	3UTR	AATAAA	0.256565	0.583544	1	N	Not Sig	ncbiRefSeq		GTATATTTCAACAGGGACCCTTGTAAATTGTCATATGCCAATAAAATGTCCTAAGTGGTA
chr1	Bclaf1	+	15117666	3UTR	TATAAA	-0.100898	0.816906	1	N	Not Sig	ncbiRefSeq		TGGAATACCAACTTGTATAAATTTGATCTGTGGTTTGATAAATGATTTTAATTTTTTAAA
chr1	Best1	-	206629339	3UTR	none	0.879781	0.0001049	0.0133007	N	FDR<0.05	ncbiRefSeq	bestrophin 1 [Source:RGD Symbol;Acc:1311656]	GCTGACGTCCCCAAGGCCATGTGACTTTACTGGTCACTGAGGCAGTGCATGCATGTCAGG
chr1	Bet1l	-	195930164	unassigned	AATAAA	-0.43247	0.473394	1	N	Not Sig	ncbiRefSeq	Bet1 golgi vesicular membrane trafficking protein-like [Source:RGD Symbol;Acc:71051]	CCCAAGGCCAGCCACAGATTAGGCTTGACTCAAAATAACTCAAATTTCTCAGAAACGAGG
chr1	Bet1l	-	195931406	3UTR	AATACA	-0.526915	0.119448	1	N	Not Sig	ncbiRefSeq	Bet1 golgi vesicular membrane trafficking protein-like [Source:RGD Symbol;Acc:71051]	AGAGGGAGAGAGAAGAACACAGACATGAATACAGTCAGAGAAGGGCACGGAACTTCAAGG
chr1	Bicra	-	76661896	unassigned	AATAAT	0.0990905	0.974302	1	N	Not Sig	ncbiRefSeq	BRD4 interacting chromatin remodeling complex associated protein [Source:RGD Symbol;Acc:1306385]	CCACCAACGCTATTCCCATAATAACACACCCAAAACCAACAGGGGCCGGAGGGGGCCTGA
chr1	Bles03	+	202736807	3UTR	AATAAA	-0.0696675	0.92209	1	N	Not Sig	ncbiRefSeq	basophilic leukemia expressed protein BLES03 [Source:RGD Symbol;Acc:628612]	TGCCTGCTCCTGGCATTTCAATAAAACCCAGCTTGGGTCTGTGTCTTGAGTGTTTTTTAA
chr1	Blm	-	134409831	unassigned	none	-0.485832	0.737579	1	N	Not Sig	ncbiRefSeq	BLM RecQ like helicase [Source:RGD Symbol;Acc:1308810]	TCAGGATTTCTCTGGGGTGGAGGATTCAGTCATTGTCACAATTGTTACAGATGCTCTGAG
chr1	Blnk	-	239753639	unassigned	AATATA	-0.282906	0.725075	1	N	Not Sig	ncbiRefSeq	B-cell linker [Source:RGD Symbol;Acc:1561933]	CTTCTCTTAGTTTAAAAATATAGTATTGCTTCCTTATATCACTGAGCACGCATCACACCC
chr1	Bloc1s2	-	243024610	unassigned	AATAAG	0.11651	0.690831	1	N	Not Sig	ncbiRefSeq	biogenesis of lysosomal organelles complex-1, subunit 2 [Source:RGD Symbol;Acc:1306551]	AAGGCGAATTACTGCCACATGGGTAGCAATAAGTTGCAAAAAAAAAAAAAAAGAACCCAT
chr1	Blvrb	+	82756311	3UTR	none	0.00412674	1	1	N	Not Sig	ncbiRefSeq	biliverdin reductase B [Source:RGD Symbol;Acc:1306080]	ATACATTTTTAGCCAAGAACTTCAAATTCTTTCAGAAAACCTAATCCTAATTTTCCTCTG
chr1	Bnip3	-	193708163	unassigned	TATAAA	-0.0412546	0.689094	1	N	Not Sig	ncbiRefSeq	BCL2 interacting protein 3 [Source:RGD Symbol;Acc:620800]	GAGAGATCTGATAGCTTCCCACCATACACTATGTCCAGTAATCATGTAAATATAAACAAA
chr1	Bnip3	-	193708285	3UTR	AATAGA	0.421225	0.836438	1	N	Not Sig	ncbiRefSeq	BCL2 interacting protein 3 [Source:RGD Symbol;Acc:620800]	ATACAATAGAATATATACAGCATGTCAAGGAGGCAGGCTTTAAAGCCATGCTATAGAAAA
chr1	Bnip3	-	193708704	3UTR	ATTATA	-0.149343	0.550114	1	N	Not Sig	ncbiRefSeq	BCL2 interacting protein 3 [Source:RGD Symbol;Acc:620800]	ATAACCCACACCCTTTAATTTTCTACTACATAATAGGATTATAAGGCCACAGAATTCCTT
chr1	Bola2	+	181292834	3UTR	AATAGA	-0.0118764	0.988568	1	N	Not Sig	ncbiRefSeq	bolA family member 2 [Source:RGD Symbol;Acc:1565363]	GATGAATTTCTTTCCTGAGCCCTCTAGGTCCCAACCTAAATAGATGGAAGTTCTGTTCTT
chr1	Borcs7	+	245577431	3UTR	AAGAAA	1.22087	0.115956	1	N	Not Sig	ncbiRefSeq	BLOC-1 related complex subunit 7 [Source:RGD Symbol;Acc:1311783]	CGCTTGCCTAGCAAGCGCAAGGCCCTGGGTTCGGTCCCCAGCTCCGAAAAAAAGAAAAAA
chr1	Borcs7	+	245577701	3UTR	TATAAA	0.239868	0.628178	1	N	Not Sig	ncbiRefSeq	BLOC-1 related complex subunit 7 [Source:RGD Symbol;Acc:1311783]	GTGACTTCCACAGACTGTTAAAGAACAGACCCTTTCCTTATACTCCCAGCATATAAAACA
chr1	Borcs7	+	245578180	3UTR	AATAAA	0.0532321	0.961217	1	N	Not Sig	ncbiRefSeq	BLOC-1 related complex subunit 7 [Source:RGD Symbol;Acc:1311783]	TAAAAATCCATCTGCTAAGAAAAATGTAGTTTTCATTTAAAATAAAAAACAAGATGATAC
chr1	Brd9	-	29329973	unassigned	none	0.10903	0.855757	1	N	Not Sig	ncbiRefSeq	bromodomain containing 9 [Source:RGD Symbol;Acc:1307359]	GACAAGGAGAAGATGCCCAGCTGACGACAGGTATCCCCACCCTCAAAGCAGACAGGATGA
chr1	Brms1	+	202355028	exon	AATAAA	-0.0155812	0.93763	1	N	Not Sig	ncbiRefSeq	BRMS1, transcriptional repressor and anoikis regulator [Source:RGD Symbol;Acc:1311057]	CAGGGCCATTCCTGGTGTCTGCCTCTCAGATCCCAAGGACTGGAATAAAATTGGACCTGG
chr1	Brsk1	-	69134165	3UTR	none	0.0940736	0.573892	1	N	Not Sig	ncbiRefSeq	BR serine/threonine kinase 1 [Source:RGD Symbol;Acc:1563268]	GTACCCACCTGTCCCTGTGATCAGAAGCACCCCAGGAATTGAGAGGCGAAGGCCAGCCAG
chr1	Brsk2	+	197088624	3UTR	AATAAA	-0.061405	0.943354	1	N	Not Sig	ncbiRefSeq	BR serine/threonine kinase 2 [Source:RGD Symbol;Acc:1566256]	CCCCTGTCAAATAACTGTGAGCAACTTCAGTTCTGGAACAATAAATTCCTTCCGTAAAGA
chr1	Bscl2	+	205743430	3UTR	AATAAA	-0.0745098	0.882061	1	N	Not Sig	ncbiRefSeq	BSCL2 lipid droplet biogenesis associated, seipin [Source:RGD Symbol;Acc:1308135]	ACCTCTTCCCTTGTTCCCTTAATAAACTATTTTGTGTCAGCTGCTAGTATGGACATCAGA
chr1	Btaf1	+	234743902	3UTR	AATAAA	0.832509	0.10839	1	N	Not Sig	ncbiRefSeq	B-TFIID TATA-box binding protein associated factor 1 [Source:RGD Symbol;Acc:1564130]	AATCAAATGTCAAAAAAATTCAGTGTGAATCAATACAATAAAAACTTGAGTTTTGCTACC
chr1	Btbd1	-	135734548	unassigned	GATAAA	-0.130479	0.858476	1	N	Not Sig	ncbiRefSeq	BTB domain containing 1 [Source:RGD Symbol;Acc:1310962]	AGATTCTAGCAGATATCTTGGGGCACTGTGGTGCGGACCTAGCGGGATAAAAGACAACCA
chr1	Btbd10	-	167431319	unassigned	CATAAA	0.554	0.123401	1	N	Not Sig	ncbiRefSeq	BTB domain containing 10 [Source:RGD Symbol;Acc:1306301]	GATTTCTAGTTTTATGTAACATACATGACATAGAATCTAGCCAACGTGTTCATAAAGTTG
chr1	Btbd10	-	167438752	intron	AATAAA	2.90533	0.212123	1	N	Not Sig	ncbiRefSeq	BTB domain containing 10 [Source:RGD Symbol;Acc:1306301]	AAAATCTATATAATTTTGTGCTATAAATAACTGGAATAAAAAAGACAAAAATACTTCACA
chr1	Btrc	+	244375789	3UTR	TATAAA	0.000772847	0.985387	1	N	Not Sig	ncbiRefSeq	beta-transducin repeat containing E3 ubiquitin protein ligase [Source:RGD Symbol;Acc:1359721]	TTTCTCTCCCATTGGGTTCCAGACAAAGATGACTTATAAATATATTTAGTGTTTTGCCAG
chr1	Btrc	+	244380126	3UTR	TATAAA	-0.275401	0.61062	1	N	Not Sig	ncbiRefSeq	beta-transducin repeat containing E3 ubiquitin protein ligase [Source:RGD Symbol;Acc:1359721]	TTTGGTTTTTTTTTTAAATGTTTGGGGGAAAAGTAAATTATAAATACAAACTTAAAGCGC
chr1	Bub3	+	186340968	3UTR	AATAAA	-0.195896	0.550148	1	N	Not Sig	ncbiRefSeq	BUB3 mitotic checkpoint protein [Source:RGD Symbol;Acc:1306654]	CTATCTAAAACTGTTATATTTTTCTGCTGTCTAATAAATCAGAGATTTGGAACTTTTAAA
chr1	C2cd3	+	154812955	3UTR	AATAAA	-0.0869726	0.84513	1	N	Not Sig	ncbiRefSeq	C2 domain containing 3 centriole elongation regulator [Source:RGD Symbol;Acc:1307366]	AGCTCTGAAATTCATTGTTTTGCCTTTGTTTTAATAAAAGTCTGGCATTTGTATTTGTGT
chr1	C5ar2	-	76930380	intron	AATAAA	0.423055	0.622211	1	N	Not Sig	ncbiRefSeq	complement C5a receptor 2 [Source:RGD Symbol;Acc:1303027]	GGAAAAATTATTACACAACAATCTGAACCAGAGAAAGCTTACAATAAACAACAAAACACA
chr1	Ca11	+	96175191	3UTR	ATTAAA	0.283244	0.714897	1	N	Not Sig	ncbiRefSeq		CACCAGGGGAGGGGAATTCACCCCAAAACAAAGCTATTAAAGGGACTGAATGTTTCCAGT
chr1	Cacng6	-	65732909	unassigned	ACTAAA	-0.894671	0.614177	1	N	Not Sig	ncbiRefSeq	calcium voltage-gated channel auxiliary subunit gamma 6 [Source:RGD Symbol;Acc:628806]	GGATTCCCTTCTCCACCCTAGAAAGCATGAGCTCCATCACAGACAGGCTCCAAATCAAGG
chr1	Cacng7	-	65800819	intron	AAGAAA	-0.020097	1	1	N	Not Sig	ncbiRefSeq	calcium voltage-gated channel auxiliary subunit gamma 7 [Source:RGD Symbol;Acc:628807]	AGAAGGAGGAAGGAAGGAAAGAAAGAAGAGAGGAGGAGGAAGAAAGAAGAGAAGGAGAAT
chr1	Cacul1	-	259666334	unassigned	AGTAAA	-0.186722	0.703333	1	N	Not Sig	ncbiRefSeq	CDK2-associated, cullin domain 1 [Source:RGD Symbol;Acc:1308127]	GTGGAACTGATCGTCCATGTTACAACAGTAAACCAGGAATGAAGTCCAGGGACACCTGCA
chr1	Calca	-	168878211	unassigned	AATGAA	-0.580819	0.273924	1	N	Not Sig	ncbiRefSeq	calcitonin-related polypeptide alpha [Source:RGD Symbol;Acc:2254]	GACCCCCCAAAACTCAAAGCTCTCTTGTAAAACACAGTATAAGTAACAGCAAAGACTCCA
chr1	Calcb	+	168970125	3UTR	none	0.0293211	1	1	N	Not Sig	ncbiRefSeq	calcitonin-related polypeptide, beta [Source:RGD Symbol;Acc:620997]	GTCCAGACGATGGTAGCAGCTCTGGTGAACCTCAGGGAGACGTGATATCACTGCCTCTTG
chr1	Calhm2	-	246022323	unassigned	none	-1.0494	0.0676903	1	N	Not Sig	ncbiRefSeq	calcium homeostasis modulator family member 2 [Source:RGD Symbol;Acc:1308276]	GTGCCATCTCCTCTTACCTTGGGCGTATGCCTTGTCAATTGCACAAACACCAGTCTAGGC
chr1	Calm3	-	77590667	unassigned	none	0.168917	0.565217	1	N	Not Sig	ncbiRefSeq	calmodulin 3 [Source:RGD Symbol;Acc:2259]	GGAAGCAATGAGGGCATGGAGGGACAGTCAGGAGGAAGGAGAAAGAGCAGTCATGCAGCT
chr1	Caly	-	194862670	unassigned	AATGAA	0.0237142	0.865918	1	N	Not Sig	ncbiRefSeq	calcyon neuron-specific vesicular protein [Source:RGD Symbol;Acc:621719]	GGTACAGAAGCTAATGAAAGTGTTCACGAAAGGTTGCCACCACCAAAAGAGAAACCAAGA
chr1	Capn1	-	203275911	unassigned	AATAAG	0.338435	0.704411	1	N	Not Sig	ncbiRefSeq	calpain 1 [Source:RGD Symbol;Acc:2267]	GACAAGGCATGCTGGTACAATCAAGGGAACAGTTTGGGAGAATAACACCCGGAGACACAT
chr1	Capn1	-	203277730	intron	none	0.282765	0.892073	1	N	Not Sig	ncbiRefSeq	calpain 1 [Source:RGD Symbol;Acc:2267]	CCTTCAGCCTCCACCCCATTCACACCCTACGTCTCTCGAGGAATACTGTGTGCACTGTGG
chr1	Capn1	-	203279589	3UTR	ATTACA	0.688942	1	1	N	Not Sig	ncbiRefSeq	calpain 1 [Source:RGD Symbol;Acc:2267]	GTGGACAGTATCTATTACAACCCCAACCTCCAGAGACATGGAAGGCAGGTGGGAGGATAC
chr1	Capn1	-	203279676	intron	AACAAA	2.74111	0.109751	1	N	Not Sig	ncbiRefSeq	calpain 1 [Source:RGD Symbol;Acc:2267]	CGACTCCAGGCTGAAGCCGTTAGTGCGCAGGGTCTTTGTCTGAAACAAACAACAAACAAA
chr1	Capn12	+	84183160	3UTR	AGTAAA	0.194764	0.573885	1	N	Not Sig	ncbiRefSeq	calpain 12 [Source:RGD Symbol;Acc:1307341]	TAAAGTAAATAGTAATTCTCTGGAAGGTTTTAATTTTTTATAGGATTTTTTTTAAGCTTT
chr1	Capn5	-	152416251	unassigned	AATGAA	-0.104311	0.780529	1	N	Not Sig	ncbiRefSeq	calpain 5 [Source:RGD Symbol;Acc:620084]	GGGGGAGAATGAGGTAGGGGTAGGAGGAACAGGACAAATGAAACAGACAGACACAGAAAG
chr1	Capns1	-	85444612	3UTR	none	-0.025448	0.827057	1	N	Not Sig	ncbiRefSeq	calpain, small subunit 1 [Source:RGD Symbol;Acc:2270]	TCACTCTACAGAGCTCTCCTTCCTGGACTCAGCGCCCCCTCTCCGCACTCAGAGTCTGAA
chr1	Carnmt1	+	216123360	3UTR	ATTAAA	-1.30911	0.0582084	1	N	Not Sig	ncbiRefSeq	carnosine N-methyltransferase 1 [Source:RGD Symbol;Acc:1311863]	TAATGTGTATATGGACTTAATTTTCCTTTAAATATTAAAGTCTACCAATTGCTATAACAG
chr1	Carns1	-	201459060	unassigned	AACAAA	-0.459035	0.453014	1	N	Not Sig	ncbiRefSeq	carnosine synthase 1 [Source:RGD Symbol;Acc:1308234]	CTCCCCACCTACTGAACCCAGATGGGGGCACTATCTAAAACAAAAACTGGATTCCAGATA
chr1	Carns1	-	201460703	CDS	none	0.225897	1	1	N	Not Sig	ncbiRefSeq	carnosine synthase 1 [Source:RGD Symbol;Acc:1308234]	AGTCTCTGTGAAGCCAGGCAGCCTTGTGGGGCCATTATCAGAGACAAAAGCAGCCAGCAG
chr1	Cars	-	198753688	unassigned	none	-0.0823014	0.854236	1	N	Not Sig	ncbiRefSeq		ACTGGGATCCATGCCTGCCCCGGTCTCTTTGAAGCAACCCTTTACAGGTGCCAGGCAGGT
chr1	Cars	-	198754223	3UTR	none	-0.0753757	0.928568	1	N	Not Sig	ncbiRefSeq		CTGCTGAGCAGGCACCTGTAGGCCAGCTCGCCCCAGTGCTGAGAGGGCAGACCGGGCCTT
chr1	Casp7	+	255476735	3UTR	ATTAAA	0.37525	0.816304	1	N	Not Sig	ncbiRefSeq	caspase 7 [Source:RGD Symbol;Acc:620944]	CCCCTCCTAATAAGTGGTTGACAAATATTCCTATTTATTGATTAAAATGTGTTTCAGAAA
chr1	Catsperz	-	204114815	unassigned	none	0.175327	1	1	N	Not Sig	ncbiRefSeq		AAGGTCACGGGGAAAGGCGGGGCCACGTGCGTCCGCCTCACGCAAGCAGCCACGCACTGA
chr1	Cavin3	-	159826548	unassigned	none	0.424854	0.606294	1	N	Not Sig	ncbiRefSeq	caveolae associated protein 3 [Source:RGD Symbol;Acc:628755]	ACCCTCCTACTGCCTTCCCCAACCCACGCTCGCTCTCGCCCTTTCGCATTGAGTCTGGGA
chr1	Cbwd1	-	222568277	unassigned	AGTAAA	-0.126908	0.733152	1	N	Not Sig	ncbiRefSeq		CTCAGTTATGATTAGTAAAGGAGTGTACCTCATTCTCACATTATACAGAAAAGAAACACA
chr1	Ccdc106	-	68779881	unassigned	none	0.213202	0.666698	1	N	Not Sig	ncbiRefSeq	coiled-coil domain containing 106 [Source:RGD Symbol;Acc:1566222]	CTCCGTGGCGACGGCCACCCCTTCCCAGCACATCCCCTTTCTAGTAAGATCTAGGGCCCA
chr1	Ccdc106	-	68780313	CDS	none	0.257992	0.722321	1	N	Not Sig	ncbiRefSeq	coiled-coil domain containing 106 [Source:RGD Symbol;Acc:1566222]	AGCAGGCGCTCCTTGGATGGATCGAACTCTCCCACCTCAGCCAGCTTTTCGGGAGCCACA
chr1	Ccdc106	-	68781006	CDS	none	0.304285	0.662687	1	N	Not Sig	ncbiRefSeq	coiled-coil domain containing 106 [Source:RGD Symbol;Acc:1566222]	ATGTACCCACTCACCCCGTTGCCTCTCTCGAGCCTTGGGCTTCCCAAATCTCCTCCGGCC
chr1	Ccdc127	-	28928419	unassigned	none	0.186433	0.7592	1	N	Not Sig	ncbiRefSeq	coiled-coil domain containing 127 [Source:RGD Symbol;Acc:735106]	TGGGTAAGCATTTTCAAGTTTGCTATCTCTCTATACAGTAAGATATGCGCAGGGTGAAAT
chr1	Ccdc127	-	28929528	3UTR	none	-0.406312	0.483132	1	N	Not Sig	ncbiRefSeq	coiled-coil domain containing 127 [Source:RGD Symbol;Acc:735106]	ATTTGGTGGTGTTTTTTGTTTTGTTTTGTTTTGTTTTGGTATGTGTGTATGTGGGTGTTC
chr1	Ccdc127	-	28929704	3UTR	ACTAAA	0.758085	1	1	N	Not Sig	ncbiRefSeq	coiled-coil domain containing 127 [Source:RGD Symbol;Acc:735106]	CCCCTAGAACTAAAATGCATAGTTGTGCTTGTTTTGCTAACTATTAGCAGCTCAAAATGT
chr1	Ccdc170	+	41041066	3UTR	CATAAA	0.43532	1	1	N	Not Sig	ncbiRefSeq	coiled-coil domain containing 170 [Source:RGD Symbol;Acc:1310945]	GAGAATACTTTCTATTAGATAGTTTATCTTATTTTAAATATATGAAACATAAACTTATAA
chr1	Ccdc189	-	182197170	unassigned	none	-0.111211	0.992991	1	N	Not Sig	ncbiRefSeq		AGCCTGGGAGAGCCAGTTCCATGTCTGCTGTCAGTTTCATAGGGGAACCAGAAGGTGCTC
chr1	Ccdc189	-	182198509	intron	none	-0.0754616	0.937898	1	N	Not Sig	ncbiRefSeq		ACAGGCCCAACCCTTTGATTTGACCTTGGCAGAGCCCTGGCCACCTTAACCCTTCTGATG
chr1	Ccdc189	-	182198839	intron	none	0.0368433	1	1	N	Not Sig	ncbiRefSeq		AGGAAGCCCTTGCCATAAGAGAAGAGGGCAGACAAGTGGCCACTCGCCACCTGCACACAG
chr1	Ccdc28a	-	12857667	unassigned	none	-0.196309	0.505926	1	N	Not Sig	ncbiRefSeq	coiled-coil domain containing 28A [Source:RGD Symbol;Acc:1310326]	TGAACCCTTGTTTCCAGATTGAGGACTTCTAGGTCTTCCAAACAGACGACAGAGGCAATC
chr1	Ccdc28a	-	12858219	CDS	none	-0.767272	0.597321	1	N	Not Sig	ncbiRefSeq	coiled-coil domain containing 28A [Source:RGD Symbol;Acc:1310326]	GGGCCGCATTAGCTGCTGGGTGCACTGGGAACGTCCTGCGCATCGGCCAAATGCAGTTTC
chr1	Ccdc28a	-	12860440	intron	none	-0.397171	0.73741	1	N	Not Sig	ncbiRefSeq	coiled-coil domain containing 28A [Source:RGD Symbol;Acc:1310326]	ACTTTACACTGTTGATAGTAGGCAAAGGATACATAGAAGAATTCAATTCTTCTAACTGCA
chr1	Ccdc61	-	78537493	unassigned	none	-0.052305	1	1	N	Not Sig	ncbiRefSeq	coiled-coil domain containing 61 [Source:RGD Symbol;Acc:1307390]	TGTCAACCCCATCCTCACTTCTGCCCACTCCAGGCCTACCCTTGAATCACAGGCTAAGGG
chr1	Ccdc8	+	77682848	3UTR	AATAAA	-1.13658	0.386237	1	N	Not Sig	ncbiRefSeq	coiled-coil domain containing 8 [Source:RGD Symbol;Acc:1359717]	GCCTTTTTGCACTTAAAGAGAGAACTCAAGCTGATATGCAAATAAAAATGTGTACAAGGC
chr1	Ccdc81	-	143739471	unassigned	AATAAA	0.144645	0.866986	1	N	Not Sig	ncbiRefSeq	coiled-coil domain containing 81 [Source:RGD Symbol;Acc:1306766]	GAATAAAAACACAGGGGTGAGAGTAACATGGGATACACAGGGAATAATTAGTCGATGTGA
chr1	Ccdc85b	-	202763644	unassigned	none	0.295154	0.556071	1	N	Not Sig	ncbiRefSeq	coiled-coil domain containing 85B [Source:RGD Symbol;Acc:1565319]	TGGGTTTCCGCCCTCTTCCCAACCCCGGCGAGTTCCAGACACAAGCTGGCAGGCTTCAGG
chr1	Ccdc88b	-	204036912	unassigned	none	0.591275	0.997406	1	N	Not Sig	ncbiRefSeq	coiled-coil domain containing 88B [Source:RGD Symbol;Acc:1311475]	CCCACGCCGATGGAAGTCCCCAGACCTCCAGTCTCCCACAAGCAGCCAGCAGACACAGAA
chr1	Ccdc89	+	144387513	3UTR	AAGAAA	1.03893	0.899771	1	N	Not Sig	ncbiRefSeq		ATGGCAAAAACAAAGAAAATTCATTTACTATACTTTTAAGTACAAAAAACACTTTACTAT
chr1	Ccdc9	-	76978311	unassigned	none	0.640935	0.998186	1	N	Not Sig	ncbiRefSeq		CCCACTGCCTCTGACCCACCACTATCAAGGAAAGATTTCTTACCCACACCCCAAAGCCAC
chr1	Ccdc9	-	76978874	intron	none	0.666307	0.567967	1	N	Not Sig	ncbiRefSeq		CACATCAAAGCCCGCCAAGCACAGCAGCCCAGCCTGATCAGCTAGCAGCACAGTTCAAAG
chr1	Ccdc9	-	76980298	intron	none	0.316767	0.758313	1	N	Not Sig	ncbiRefSeq		TTTTCTAAACATCTCCCCATATGAGGGGAGCAAGGGGGGTTCAAGGACACAGTGGGGTGG
chr1	Ccdc9	-	76981350	CDS	none	-0.33805	0.998017	1	N	Not Sig	ncbiRefSeq		AAGGACTCCACACAACCAAGCACATTGAGGAGGGGCTGTCCCAAGGGAAGGGCACCCCAC
chr1	Ccdc90b	+	146646314	3UTR	AATAAA	-0.175076	0.622692	1	N	Not Sig	ncbiRefSeq	coiled-coil domain containing 90B [Source:RGD Symbol;Acc:1308637]	TTTTATTTTCTTGGTTATTATTGCAATTAGATTTTTATATAAAATAAAATACTATAACAA
chr1	Ccdc97	-	81219224	unassigned	AATACA	0.3681	0.465952	1	N	Not Sig	ncbiRefSeq	coiled-coil domain containing 97 [Source:RGD Symbol;Acc:1309393]	TGACTCAATGGCTGTGCAGCTCAGCTTTTAGAAAGTTACATAAGAGATTGATGGATGGCA
chr1	Ccdc97	-	81220691	3UTR	AAGAAA	-0.0497558	0.881483	1	N	Not Sig	ncbiRefSeq	coiled-coil domain containing 97 [Source:RGD Symbol;Acc:1309393]	CGGGAGGTGGGGCAGTGGCATGAAGGGAGAAAGAGGGTAAGAAAAGGACATGTAGACCAA
chr1	Ccdc97	-	81220849	3UTR	none	-0.458806	0.926747	1	N	Not Sig	ncbiRefSeq	coiled-coil domain containing 97 [Source:RGD Symbol;Acc:1309393]	ATCCTGGATCAGAGAAAAGACGATGGGGCCAGGGCAAGAGGGGCAGTGATGTTCCCAGAG
chr1	Ccer2	+	84046222	3UTR	AATAAA	-0.562224	0.682712	1	N	Not Sig	ncbiRefSeq	coiled-coil glutamate-rich protein 2 [Source:RGD Symbol;Acc:6502457]	TGACTCGGGACCCCACCCCCAGCTCCTCCACCCTTCCTGAGTGAATAAAGCACAAAGCAA
chr1	Cckbr	+	159781738	3UTR	none	-0.600808	0.450757	1	N	Not Sig	ncbiRefSeq	cholecystokinin B receptor [Source:RGD Symbol;Acc:2290]	AACCTTGTGCAAAAAGGCCAGGGTATGAAGATAGGGATGAGCGTACCCTCTCTTGGTTGT
chr1	Ccn2	-	20802198	unassigned	none	0.344955	0.657441	1	N	Not Sig	ncbiRefSeq	cellular communication network factor 2 [Source:RGD Symbol;Acc:621392]	AAACTTCCTGCTTACACCCAGGGAAACCCAAGGAAAGTTTACAAGAATGAGCAGCCAAGC
chr1	Ccnd1	-	200089001	unassigned	AAGAAA	0.272055	0.627407	1	N	Not Sig	ncbiRefSeq	cyclin D1 [Source:RGD Symbol;Acc:68384]	GCATACCTCCCCCCACCCCCGACTCCTGTCCTTAGGGCCAAGAAAATACACAACAGCAAG
chr1	Ccne1	-	90781946	unassigned	none	-0.825249	0.168552	1	N	Not Sig	ncbiRefSeq	cyclin E1 [Source:RGD Symbol;Acc:2294]	GGTAGAGCCACTCTAAAAGAGAACTGCTAGTTTCTGATACTGCAGAGTTAACAACAGCTG
chr1	Ccp110	+	173070065	3UTR	AATAAA	-0.684629	0.337684	1	N	Not Sig	ncbiRefSeq	centriolar coiled-coil protein 110 [Source:RGD Symbol;Acc:1310509]	TGGTTTTCACTAGTTTTGCTTCTAGGTAAAAGGCAAAATAAAGTTTTCATCCTAAAGGAA
chr1	Ccp110	+	173072872	3UTR	AATAAA	-0.0602753	0.84755	1	N	Not Sig	ncbiRefSeq	centriolar coiled-coil protein 110 [Source:RGD Symbol;Acc:1310509]	TACTTTGGTTTTCACTAGTTTTGCTTCTAGGTAAAAGGCAAAATAAAGTTTTCATCCTAA
chr1	Ccs	-	202113791	unassigned	ATTAAA	0.0229145	0.999458	1	N	Not Sig	ncbiRefSeq	copper chaperone for superoxide dismutase [Source:RGD Symbol;Acc:620403]	GATACAGACAGCAGAGAGACTCTACTCACTAAGCCCATTAAAAGACACAGAGACACAGAA
chr1	Ccs	-	202114185	intron	none	0.0503355	0.971905	1	N	Not Sig	ncbiRefSeq	copper chaperone for superoxide dismutase [Source:RGD Symbol;Acc:620403]	TCAGGGTTTCATGTGCCCCACTGGCATATCACCCCCTCCTGCTGGGGGTAGCATAACTCA
chr1	Cd151	+	196568751	3UTR	AATAAA	-0.0422679	0.762546	1	N	Not Sig	ncbiRefSeq	CD151 molecule (Raph blood group) [Source:RGD Symbol;Acc:621290]	TCCCAGATGCCCACAGATGCTCCTGCTGTGTGACAGGTGCTCAATAAATGTATAAGCAGT
chr1	Cd248	+	202376238	3UTR	AATAAA	0.454432	0.653306	1	N	Not Sig	ncbiRefSeq		AGGGGTGGGTGCTGGGATCTTCTCCAATAAATGGCGTGCCAACCTCACCCAAAGTCCGTG
chr1	Cd274	+	227136381	3UTR	ATTAAA	-1.47524	0.0220755	0.766121	N	Not Sig	ncbiRefSeq	CD274 molecule [Source:RGD Symbol;Acc:1566211]	TGTCTGATTGTCATTGTATTGCATTAATTTAATAAGATATTATTTATTAAAAACATTTGA
chr1	Cd274	+	227137376	3UTR	AATAAA	0.116239	0.754425	1	N	Not Sig	ncbiRefSeq	CD274 molecule [Source:RGD Symbol;Acc:1566211]	ATACGGATGTACAGGCGAAACATGCAGGCCCATAAAATAGAAATAAATCTTAAAAATATA
chr1	Cd2bp2	-	181809398	unassigned	ACTAAA	0.0144399	0.853012	1	N	Not Sig	ncbiRefSeq	Cd2 (cytoplasmic tail) binding protein 2 [Source:RGD Symbol;Acc:1311741]	CTCTCCAGAGTGGGTGGGTGTATATTCACTTTCTTCCAGTGCTTTGTTAAATCACCACAA
chr1	Cd33	-	93935417	unassigned	AACAAG	0.0195244	0.956507	1	N	Not Sig	ncbiRefSeq	CD33 molecule [Source:RGD Symbol;Acc:1596020]	TATCCCCAGTGGCACACTTCCTCCAACTAGGCCACACCTATTTCAACAAGGCCACACCTC
chr1	Cd33	-	93935708	3UTR	ATTATA	0.691345	0.564918	1	N	Not Sig	ncbiRefSeq	CD33 molecule [Source:RGD Symbol;Acc:1596020]	AGAGAGGTGAGGCAGGAGGAGAAGGCAGGAGCCCATTATACTGAGTACAAAAACCAAAAA
chr1	Cd37	-	95719170	3UTR	AATAAA	0.00958066	0.999253	1	N	Not Sig	ncbiRefSeq	CD37 molecule [Source:RGD Symbol;Acc:62035]	GACCACCCTGCCACCTTCCCTTCCCCAAGAGTGATGGTTTATGTTTGAAGGAGAATAAAA
chr1	Cd6	-	207442872	unassigned	none	0.487894	0.920632	1	N	Not Sig	ncbiRefSeq	Cd6 molecule [Source:RGD Symbol;Acc:2312]	GGGAGAGGGAGAGGGAGAAAGAGAGAGCACCGAGTTTAAGGAACTGTCAAGATACACCTA
chr1	Cd81	+	198251657	3UTR	AATAAA	0.10112	0.779454	1	N	Not Sig	ncbiRefSeq	Cd81 molecule [Source:RGD Symbol;Acc:2315]	CTTCAACTGTAATTAAATCTTGAAACAGTCATTTAATAAAGGAGGAAAAAATCAGGCATG
chr1	Cdc37l1	+	226729245	intron	CATAAA	0.112314	1	1	N	Not Sig	ncbiRefSeq	cell division cycle 37-like 1 [Source:RGD Symbol;Acc:1309295]	GACAATATGAGGAGAGTCCTGTATTTATCTTTAAGCCTCATAAAATGGTAAAAAAAAAAA
chr1	Cdc37l1	+	226733994	3UTR	AATAAA	0.224225	0.57293	1	N	Not Sig	ncbiRefSeq	cell division cycle 37-like 1 [Source:RGD Symbol;Acc:1309295]	TTGTGCTTTTGATATAAATATATATACTCTATAATAAAATGTCTGACTAATTTATATGGC
chr1	Cdc42bpg	+	203628502	3UTR	AATAAA	-0.13565	0.900797	1	N	Not Sig	ncbiRefSeq	CDC42 binding protein kinase gamma [Source:RGD Symbol;Acc:1307260]	GGATGGATGGGCTCTGATGCACCGAGATGTGGCAAGAAACAATAAAGCCAACTTTACAAG
chr1	Cdc42ep2	-	203201999	unassigned	none	-0.213389	0.548672	1	N	Not Sig	ncbiRefSeq	CDC42 effector protein 2 [Source:RGD Symbol;Acc:1310253]	AGCACAGCGTTCATGGAGACTGGCCCACCTTCAGGAGGAAACCCAGCAAAAGGGAACAGG
chr1	Cdc42ep5	+	70038297	3UTR	ACTAAA	0.266149	0.830558	1	N	Not Sig	ncbiRefSeq		AAGGGGTGCAGAAGCAGGACAGTGGTGGGGTGCCACCAACTAAAAGTCAAATCTGTCCTC
chr1	Cdipt	+	181587407	3UTR	AATAAA	0.177134	0.529636	1	N	Not Sig	ncbiRefSeq	CDP-diacylglycerol--inositol 3-phosphatidyltransferase [Source:RGD Symbol;Acc:620576]	CTGCCTGGAGTGAAAAGTAGCCTGGCATGTGGTAACTGCTTAATAAATATTCATGGAAAG
chr1	Cdk2ap2	+	201393137	3UTR	AATAAA	0.0498011	0.917472	1	N	Not Sig	ncbiRefSeq	cyclin-dependent kinase 2 associated protein 2 [Source:RGD Symbol;Acc:1588883]	GTGTCTTTTACTAAATATGCCCTTTTTATATAAATAAAAGATGATTTGGAGCCATTCTCT
chr1	Cdkn1c	-	198655393	unassigned	AACAAG	1.34483	0.225391	1	N	Not Sig	ncbiRefSeq	cyclin-dependent kinase inhibitor 1C [Source:RGD Symbol;Acc:727892]	CCCACCATATTCATTTGCCTCAGCTCTGAGCCACAAACGTGTAAAAGAACAAGACTTCGA
chr1	Cdr2	-	175502836	unassigned	CATAAA	2.08251	0.136734	1	N	Not Sig	ncbiRefSeq	cerebellar degeneration-related protein 2 [Source:RGD Symbol;Acc:1310578]	TGAGAAATACTGGGGAAAGCCAGCTGGTTTCAGCTGTAAACGAAAAACGACAGACAGTAG
chr1	Ceacam1	-	81043594	intron	AAGAAA	-2.27327	0.0107009	0.483396	N	Not Sig	ncbiRefSeq	CEA cell adhesion molecule 1 [Source:RGD Symbol;Acc:67396]	CTGGCTTCTATCCAAAGCATGGCATAACCGAAAACAAGAAACAGAAAAACCCACCAAGTG
chr1	Ceacam16	-	79514974	unassigned	none	0.93143	0.84912	1	N	Not Sig	ncbiRefSeq	CEA cell adhesion molecule 16, tectorial membrane component [Source:RGD Symbol;Acc:1306386]	TACCAAAGCAAGCTGCGCTTGGCCAGGCTGGCGGCGGTGGAAGGAAAGGCTGACAACCAC
chr1	Ceacam4	+	80382941	3UTR	AATAAA	1.25808	0.60997	1	N	Not Sig	ncbiRefSeq	CEA cell adhesion molecule 4 [Source:RGD Symbol;Acc:708435]	GCTGATGGTGTCCCGCTTCACCTCCCTCCGCCAGCAATAAAGTCAGCAAAACTTCTACAA
chr1	Cebpa	+	87762303	3UTR	TATAAA	-1.31646	0.231421	1	N	Not Sig	ncbiRefSeq	CCAAT/enhancer binding protein alpha [Source:RGD Symbol;Acc:2326]	ACAAAGTTTCATGCTAGATGTCCTATGTATTATATCTATAATATAAACATATCAAACTCA
chr1	Cemip	-	137906920	unassigned	ATTAAA	0.745759	0.312519	1	N	Not Sig	ncbiRefSeq	cell migration inducing hyaluronidase 1 [Source:RGD Symbol;Acc:1305254]	AGATGACTGGTCTAACAATGAGGCCCACCGTACCAGTGAATTAAACCAGCAGACAAGACA
chr1	Cemip2	+	219407360	3UTR	AATAAA	1.68369	0.0888663	1	N	Not Sig	ncbiRefSeq	cell migration inducing hyaluronidase 2 [Source:RGD Symbol;Acc:1307941]	CTGATTTTATGTACTAATAATTAGGGCCTAAGTTAAATAAATAAAAATGTGTGTGCATGT
chr1	Cend1	-	196525152	unassigned	none	-0.0821786	0.675132	1	N	Not Sig	ncbiRefSeq	cell cycle exit and neuronal differentiation 1 [Source:RGD Symbol;Acc:1309401]	TACCCAAGTAGGAAGCCTTTGCCCCTCCCAGCCCCATGCAGGTGAGGACACCAGCCCAGC
chr1	Cenpw	+	27530453	3UTR	AATAAA	-0.672728	0.447419	1	N	Not Sig	ncbiRefSeq	centromere protein W [Source:RGD Symbol;Acc:1593465]	GCTTATTGAAGAGCATTTTGCTTTGTCCAATAAAATTTCTATGAATGGTTGTAAACATTG
chr1	Cep43	-	52533417	unassigned	AATAAA	0.151946	0.708172	1	N	Not Sig	ncbiRefSeq	centrosomal protein 43 [Source:RGD Symbol;Acc:1583370]	ATGAACGGCGTTTTACAAGAGCAAAGTCCTGTCGAGCATTTAAAAATAAAACACTGTAAA
chr1	Cep43	-	52534212	3UTR	none	1.33113	0.118138	1	N	Not Sig	ncbiRefSeq	centrosomal protein 43 [Source:RGD Symbol;Acc:1583370]	CGCTGACACAAACCACAGCGCCTGCTCACTCACTCAACACGGATCAATGGTTTCCAATTT
chr1	Cep43	-	52547638	CDS	AAGAAA	0.445713	0.659778	1	N	Not Sig	ncbiRefSeq	centrosomal protein 43 [Source:RGD Symbol;Acc:1583370]	CACCAACCATAGGTTTTTTCTGGTTTAGGAATGGGATCATCAAAGAAAGAATCTCCTTCC
chr1	Cep72	+	29255294	3UTR	AATAAA	-0.565627	0.582609	1	N	Not Sig	ncbiRefSeq	centrosomal protein 72 [Source:RGD Symbol;Acc:1566336]	CTTGTATGATGTTAACGTGTCATAGTAAAACAAATAAAAAACCTCCCCACTTGTGCCTCA
chr1	Cep78	-	213246182	unassigned	none	0.684776	0.51084	1	N	Not Sig	ncbiRefSeq	centrosomal protein 78 [Source:RGD Symbol;Acc:620464]	TCGCACATTCACACACCCACAGTTGCACATACTACCACCAACACCGTACACAAAGTGAAA
chr1	Cep78	-	213247346	3UTR	AATATA	0.429655	0.614411	1	N	Not Sig	ncbiRefSeq	centrosomal protein 78 [Source:RGD Symbol;Acc:620464]	AAGAAGTATAGAAAACTTGCCCTATAGTATTTCTAGCCCTGTATTTTAATATACCACTCA
chr1	Cep89	+	88100111	3UTR	AATAAA	-0.319708	0.499793	1	N	Not Sig	ncbiRefSeq	centrosomal protein 89 [Source:RGD Symbol;Acc:1311730]	GGAGGCCCATGGAAGCCACTGAGTGTCACAGGCAAGAATGAAATAAACCTGCCCAGGCAT
chr1	Cfap161	-	137743782	unassigned	none	-1.49624	0.314896	1	N	Not Sig	ncbiRefSeq	cilia and flagella associated protein 161 [Source:RGD Symbol;Acc:1310371]	TGACATCCCAGGTTGGAGGCTAAAACCAAAGTAGGCTGTTTTTCAGAGCACCACAGGGAC
chr1	Cfap43	-	246625258	unassigned	ATTACA	0.688942	1	1	N	Not Sig	ncbiRefSeq	cilia and flagella associated protein 43 [Source:RGD Symbol;Acc:1560545]	AGTTTACAATCCGGTGTTTCTTGACTGAAGACCACTGTTCTTTAATAATTACAAACGACA
chr1	Cfap58l1	+	246911363	3UTR	AATAAA	-0.496244	0.73731	1	N	Not Sig	ncbiRefSeq		CTGGGGTAGGAAAATCTGTTCTGAAGAAGAAATGCCAATAAATACTTCATCATAAAAAAA
chr1	Cfl1	+	202801335	3UTR	AATAAA	0.328193	0.192089	1	N	Not Sig	ncbiRefSeq	cofilin 1 [Source:RGD Symbol;Acc:69285]	ACCAGTAAGGGACCTTCAATTTAAAAAAAAAAAAACACAATAAAAAGGCTAATTAACAAT
chr1	Ch25h	-	232014876	unassigned	none	0.223651	0.948566	1	N	Not Sig	ncbiRefSeq	cholesterol 25-hydroxylase [Source:RGD Symbol;Acc:1310575]	ACACACACACACAGTTTCTTTTTAGTTTTTATCCAGCGGGTCCATCAGGAGTCAACACTT
chr1	Chd1	+	56708462	intron	AATAAA	0.9708	0.849534	1	N	Not Sig	ncbiRefSeq	chromodomain helicase DNA binding protein 1 [Source:RGD Symbol;Acc:1306794]	TGTGGTAGCTTTGAACATTTTTTTGTCTTATGAAAATAATAAAGTAATTTCTAAAATAAA
chr1	Chd1	+	56729119	3UTR	AATAAA	1.42782	0.175532	1	N	Not Sig	ncbiRefSeq	chromodomain helicase DNA binding protein 1 [Source:RGD Symbol;Acc:1306794]	CATTGTACCAACTAACCTTCCATTTTAATAATAAACAATAAACGATTCTTATAAAAAGCA
chr1	Chd2	-	127188145	unassigned	AATATA	0.120549	0.604115	1	N	Not Sig	ncbiRefSeq	chromodomain helicase DNA binding protein 2 [Source:RGD Symbol;Acc:1310056]	TGGTTAGCCCAATTCTAAAAATCCTTAGTAACACGTTTTAATATACAAGACTCAAAAGTA
chr1	Chid1	-	196594359	exon	AAGAAA	-0.142091	0.75635	1	N	Not Sig	ncbiRefSeq	chitinase domain containing 1 [Source:RGD Symbol;Acc:1308955]	GTATGAAGGCAGGGCCTTCTGCACTGCCTTTGTCAGACTTTAGGGTGAAGCTAAGAAAGG
chr1	Chid1	-	196594504	3UTR	none	-0.0841542	0.788549	1	N	Not Sig	ncbiRefSeq	chitinase domain containing 1 [Source:RGD Symbol;Acc:1308955]	AGAGCCCGGCTGTCCTAAGGGATGGGAATTGTGTTTTTACCTGACTCACAGCAGGCAGCA
chr1	Chka	+	201125515	3UTR	AATAAA	1.13545	0.00835866	0.407828	N	Not Sig	ncbiRefSeq	choline kinase alpha [Source:RGD Symbol;Acc:61944]	GTGCACATATTTCTGCTACCACCGAAACTGTATTATACAGATAAATAAACAACTTGAAAC
chr1	Chmp2a	-	73660044	unassigned	none	0.0346518	0.963329	1	N	Not Sig	ncbiRefSeq	charged multivesicular body protein 2A [Source:RGD Symbol;Acc:1305050]	TCCTCTTCACTCCAACCTGGAATTTGGGTCTTAGTGTAACTAGTCACAAGCTCAGCCTTG
chr1	Chp2	+	176772188	3UTR	AAGAAA	-0.573764	0.926193	1	N	Not Sig	ncbiRefSeq	calcineurin-like EF hand protein 2 [Source:RGD Symbol;Acc:727796]	TCCGGAAGACTTAGCATAGAGAGGTGGTTGACTTAAGAAAAATGAAGTAATATTATCAGA
chr1	Chp2	+	176772443	3UTR	AATAAA	1.68193	0.252824	1	N	Not Sig	ncbiRefSeq	calcineurin-like EF hand protein 2 [Source:RGD Symbol;Acc:727796]	GGTGACTGGAGGGAGGATGGGGTACAGTAATAAACTTTCCTAAAGTGGATGGTTACTCCA
chr1	Chrm1	+	205582999	3UTR	AATAAA	0.0225921	0.968994	1	N	Not Sig	ncbiRefSeq	cholinergic receptor, muscarinic 1 [Source:RGD Symbol;Acc:2342]	TCTTTCCATCCTCAGCATATGCTGAGTCTGTGAATAAAGCCACGTAACTAGTGGGAACTA
chr1	Chst15	-	187028859	unassigned	AACAAG	-0.432582	0.285743	1	N	Not Sig	ncbiRefSeq	carbohydrate sulfotransferase 15 [Source:RGD Symbol;Acc:628881]	CTTCCTGCCCTGAGACTTGCTCGCACACACAGAACAACATGGAGACAACTGTCCAGCAAG
chr1	Chst8	-	87294143	unassigned	none	-0.207905	0.732018	1	N	Not Sig	ncbiRefSeq	carbohydrate sulfotransferase 8 [Source:RGD Symbol;Acc:1308979]	GCATAGGGCAAGGTCCTTCCCTATGAACTTACAGCAAGACCCGGAGTAGACTGAAAACCA
chr1	Chsy1	+	119750711	3UTR	AGTAAA	0.501284	0.462363	1	N	Not Sig	ncbiRefSeq	chondroitin sulfate synthase 1 [Source:RGD Symbol;Acc:1311904]	TATTTTGGTGTTAGTTGAAAACTTGAATTACATTTGGAGAGTAAAACATTGAAGCACAGA
chr1	Chuk	-	242959538	unassigned	ATTATA	0.256225	0.657616	1	N	Not Sig	ncbiRefSeq	component of inhibitor of nuclear factor kappa B kinase complex [Source:RGD Symbol;Acc:1306661]	CAAACTATATTAGCCTATAGTACTACACATTGCAGTTTGGTAATGAGTAGAGATTCAAAA
chr1	Cib1	-	134178330	unassigned	none	0.0327432	0.902377	1	N	Not Sig	ncbiRefSeq	calcium and integrin binding 1 [Source:RGD Symbol;Acc:620133]	CTCCGACGTGGGGATGATCACAGGCTCCTACAAGTCCAGTCCTGCTGCTACTGTCATACA
chr1	Cic	+	80880537	3UTR	ATTAAA	-0.126681	0.967872	1	N	Not Sig	ncbiRefSeq	capicua transcriptional repressor [Source:RGD Symbol;Acc:1310706]	GCAATATTTCTTACTGTGCCGAGAAGCCGCAATGACCGAGATTAAAGCTGTTTAACACAG
chr1	Cited2	+	12314867	3UTR	AATAAA	1.96127	7.406e-08	1.87021e-05	Y	FDR<0.05	ncbiRefSeq	Cbp/p300-interacting transactivator, with Glu/Asp-rich carboxy-terminal domain, 2 [Source:RGD Symbol;Acc:620112]	AAAAAATACTTGTTAATTTATTCTATTTTAATTTGCCAATGTCAATAAAAAGTTAAGAAA
chr1	Clasrp	-	79232259	unassigned	ATTAAA	0.311676	0.878187	1	N	Not Sig	ncbiRefSeq	CLK4-associating serine/arginine rich protein [Source:RGD Symbol;Acc:1563538]	ACAGCACCTGCAGCAGTCTTCAGCCTGGAAGTTCTAAATTAGAGGACAGCATGTGGCGAA
chr1	Clec11a	-	94800455	unassigned	AATACA	0.495593	0.426428	1	N	Not Sig	ncbiRefSeq	C-type lectin domain containing 11A [Source:RGD Symbol;Acc:3627]	GGTATCTGCCCTCCCCTGACCTCCTTGGGCACTAGACACACACATGTTGAATACACACAC
chr1	Clec11a	-	94801492	3UTR	GATAAA	-0.153028	0.708897	1	N	Not Sig	ncbiRefSeq	C-type lectin domain containing 11A [Source:RGD Symbol;Acc:3627]	TCCTAACTCCCCCCCTCCCCCAGGCAAGATAAAGGTCAATTGACCCCACGGCCCCTCAAA
chr1	Clip3	+	85563184	3UTR	AATAAA	0.0877627	0.767959	1	N	Not Sig	ncbiRefSeq	CAP-GLY domain containing linker protein 3 [Source:RGD Symbol;Acc:1306245]	TTCACTGCATGTCCCTAAACTCAGCATGACTCCTGTCCTCTTCAATAAAGACGTTTCTAT
chr1	Cln3	-	181156070	unassigned	TATAAA	-0.162425	0.813739	1	N	Not Sig	ncbiRefSeq	CLN3 lysosomal/endosomal transmembrane protein, battenin [Source:RGD Symbol;Acc:1359537]	AAATACATATATCCCAAAGTGGGCTTATATAAACTTTCCGTTTCAGAGACTGCACAGAAA
chr1	Clns1a	+	152039670	3UTR	AATAAA	-0.162849	0.532103	1	N	Not Sig	ncbiRefSeq	chloride nucleotide-sensitive channel 1A [Source:RGD Symbol;Acc:61884]	AAGTACTCTCAATGATATTTTGTCTTTGTAATAGTTAAATAAATCTGGGTTTTCTATATC
chr1	Clpb	+	156151527	3UTR	AATAAA	0.588214	0.566497	1	N	Not Sig	ncbiRefSeq	caseinolytic mitochondrial matrix peptidase chaperone subunit B [Source:RGD Symbol;Acc:621328]	CCTGAACATCTAATAAAGGCCCCTTGCTGTGGCATGGCAACCAATCCACCTGGCCCTCAT
chr1	Clpb	+	156158183	3UTR	AATAAA	-0.0330761	0.962975	1	N	Not Sig	ncbiRefSeq	caseinolytic mitochondrial matrix peptidase chaperone subunit B [Source:RGD Symbol;Acc:621328]	AACTTATTAGCATTAAAGATACTTGGTGAGTGACTAAATAAAAGCTTAATATACCAAAAA
chr1	Clptm1	-	79289477	unassigned	none	0.259914	0.508393	1	N	Not Sig	ncbiRefSeq	CLPTM1 regulator of GABA type A receptor forward trafficking [Source:RGD Symbol;Acc:1310959]	TCTTCAAGACCTCAGCCAGATGCACGGTCCAGACAAGGAAGGCAGAGGAGGTGCTGTGGT
chr1	Clptm1l	-	29667544	unassigned	AAGAAA	-0.0960939	0.899589	1	N	Not Sig	ncbiRefSeq	CLPTM1-like [Source:RGD Symbol;Acc:1307896]	AGAAATCTATCTTTTGTATTGATCTCTAAGAAAGGTTTAACGTATAATATCCACAATATT
chr1	Cnfn	-	80949698	3UTR	none	0.000844696	0.991068	1	N	Not Sig	ncbiRefSeq	cornifelin [Source:RGD Symbol;Acc:1563577]	AGCCTCTTTCCCAGTCTGATAGGTCCTGATAATGTGCATGTGTCAGCAGGGCTCACATTT
chr1	Cnih2	-	202399415	unassigned	none	0.036644	0.634007	1	N	Not Sig	ncbiRefSeq	cornichon family AMPA receptor auxiliary protein 2 [Source:RGD Symbol;Acc:1304930]	TCTAGAATATTCCACCTAACCCTATGTGTTCAAGCCTTCTAGAAGCAGAATTTGGGGCCT
chr1	Cnksr3	-	43499272	unassigned	CATAAA	0.444274	0.559776	1	N	Not Sig	ncbiRefSeq	Cnksr family member 3 [Source:RGD Symbol;Acc:1307544]	GTCATTTATGTTTGCTTCCTTAGCTCCTCTACCACAAATTCATAAAATCCTAAAACGCTT
chr1	Cnnm1	+	242341563	intron	none	-0.0464038	1	1	N	Not Sig	ncbiRefSeq	cyclin and CBS domain divalent metal cation transport mediator 1 [Source:RGD Symbol;Acc:1308728]	CAACCTCTACACACCCGACTACTCTGTGCACATCCTCAGCGATGTGCAGTTTGTGAAGGT
chr1	Cnnm1	+	242354905	3UTR	AATAAA	0.0309164	0.769012	1	N	Not Sig	ncbiRefSeq	cyclin and CBS domain divalent metal cation transport mediator 1 [Source:RGD Symbol;Acc:1308728]	TTTCTTCAGGTTAAAATACATTTTAAAAAAGAGATTTTAAAATAAAGCATTTATGAAGAC
chr1	Cnnm2	+	245768081	3UTR	GATAAA	-0.971415	0.380154	1	N	Not Sig	ncbiRefSeq	cyclin and CBS domain divalent metal cation transport mediator 2 [Source:RGD Symbol;Acc:1308162]	TAAAAGGTTTTGTTCATTTCTATTATTCTATTTAGATAAATGATTTTCTGTTCACCCTTT
chr1	Cnnm2	+	245769539	3UTR	GATAAA	0.13992	0.854956	1	N	Not Sig	ncbiRefSeq	cyclin and CBS domain divalent metal cation transport mediator 2 [Source:RGD Symbol;Acc:1308162]	GTGCTCATAACTCCCAGGTATGAATGTTCTGTAAGTCCTAGGATAAAGGAATTGGTTATA
chr1	Cnot3	-	65555923	3UTR	none	0.405562	0.661286	1	N	Not Sig	ncbiRefSeq	CCR4-NOT transcription complex, subunit 3 [Source:RGD Symbol;Acc:1304771]	CGCCAGCAGAATCCAACTCCTCCCCACTGAACTCTTTTGGGGGGATAGGGGAGGCTGCAG
chr1	Cntf	-	209887853	unassigned	AATATA	-0.193509	0.777809	1	N	Not Sig	ncbiRefSeq	ciliary neurotrophic factor [Source:RGD Symbol;Acc:2370]	CCCTCCAGGACAAAGATGTAAAGTTTTACAGAATATACAAAGCCCATGGAACACTCACTG
chr1	Coa4	+	154884903	3UTR	AATAAA	-0.365111	0.333141	1	N	Not Sig	ncbiRefSeq	cytochrome c oxidase assembly factor 4 homolog [Source:RGD Symbol;Acc:1562228]	GACCTTCCTTTTGCTTAGAGACTAGTGTGAGAGCAGAAATAAAGCAACACTCAAAGGAGT
chr1	Coa4	+	154885443	3UTR	ATTAAA	-0.2226	0.713986	1	N	Not Sig	ncbiRefSeq	cytochrome c oxidase assembly factor 4 homolog [Source:RGD Symbol;Acc:1562228]	GAACTCACAGAGATCTGCCTGCCTCTGCCTTCTGAGCACTGGGATTAAAGGCACATGCCA
chr1	Cog7	-	176489794	unassigned	none	-0.214327	0.751331	1	N	Not Sig	ncbiRefSeq	component of oligomeric golgi complex 7 [Source:RGD Symbol;Acc:1566058]	TTCTCAGACCCTGCTCAGTGTGTGAGCACTTAGACATCACCAGAGAAGGACACACCCTTT
chr1	Copb1	-	168404333	unassigned	CATAAA	-0.230869	0.639535	1	N	Not Sig	ncbiRefSeq	COPI coat complex subunit beta 1 [Source:RGD Symbol;Acc:620861]	GTAACTCTCTTCATAAATATAGGCCAGGTAAAAAAAAGAAGAAATTCCACTGATACAAAT
chr1	Coq7	-	172836358	intron	AAGAAA	0.0552388	0.953149	1	N	Not Sig	ncbiRefSeq	coenzyme Q7, hydroxylase [Source:RGD Symbol;Acc:2381]	CATGTGCCATAAGGTGGGCAGGGTTAGTTTACTGCCAGCCTCACAGCACAAGAAAACCAA
chr1	Coq7	-	172838736	CDS	none	0.0539753	0.980377	1	N	Not Sig	ncbiRefSeq	coenzyme Q7, hydroxylase [Source:RGD Symbol;Acc:2381]	CTCTCCCCACAAGCACACAGTCAGTCTCTCCCCCCAAGCACACAGTCAGTCACCTGCAGC
chr1	Coq8b	+	82549181	3UTR	AATAAA	0.243094	0.700158	1	N	Not Sig	ncbiRefSeq	coenzyme Q8B [Source:RGD Symbol;Acc:1311356]	GTATTGGAGGATGGGGGTGGGTGCTGATCCTTCCCTCCGAATAAAGGCACCCTTTCCCTA
chr1	Coro1a	-	181295560	unassigned	none	0.0928524	0.896873	1	N	Not Sig	ncbiRefSeq	coronin 1A [Source:RGD Symbol;Acc:620009]	CCTTGCGTTCAGAGAACTATCAAGGGGAAGCCTTGGGGCTAGCCAGTTCACCAGTCAGAG
chr1	Coro1b	+	201448414	3UTR	AATAAA	0.220224	0.540289	1	N	Not Sig	ncbiRefSeq	coronin 1B [Source:RGD Symbol;Acc:2382]	AGAAAAAGCAGCAGAGATGGGTTCTATATTTTCATTCCAAATAAAATGCTCTTTCTAAAG
chr1	Cox15	-	242605587	unassigned	none	-0.0509403	0.806694	1	N	Not Sig	ncbiRefSeq	cytochrome c oxidase assembly homolog COX15 [Source:RGD Symbol;Acc:1312043]	GTCATCAGAGTTATGGCCTAATCAATCCCATGGGGCTGGTAAAAGGAAAAAAAATCCTGG
chr1	Cox15	-	242614124	intron	none	0.629526	0.436195	1	N	Not Sig	ncbiRefSeq	cytochrome c oxidase assembly homolog COX15 [Source:RGD Symbol;Acc:1312043]	AGGACTCTGGTTTTTCTTCTAATCCACTTTTCACCATATACCAACCCAACAGACCCTACA
chr1	Cox6a2	-	182788527	unassigned	AAGAAA	-0.445787	0.791451	1	N	Not Sig	ncbiRefSeq	cytochrome c oxidase subunit 6A2 [Source:RGD Symbol;Acc:2385]	ACCTACCCTATGGCCTGCCCAGCCTCTCTGCCATGCCGTTCCCAAAGAATCAGAGGACAC
chr1	Cox6b1	-	85875079	unassigned	AAGAAA	-0.017595	0.992581	1	N	Not Sig	ncbiRefSeq	cytochrome c oxidase subunit 6B1 [Source:RGD Symbol;Acc:1584097]	CTTTAAACAAATCTACCCGTCATTTTACAAAGAAAAAGATAGCCACTATGAGGCCCCTTC
chr1	Cox6b1	-	85875188	3UTR	none	0.915076	0.245129	1	N	Not Sig	ncbiRefSeq	cytochrome c oxidase subunit 6B1 [Source:RGD Symbol;Acc:1584097]	TTTTATTAGTAGTTGCATCATGATTCAGGGTCCCAGGGTAGGGACCATCATATACTGAGG
chr1	Cox6b2	+	69095311	3UTR	AATAAA	0.563757	0.610668	1	N	Not Sig	ncbiRefSeq		TGGGTTGCCCCCCTCCTCCACTTTGTCCTTATGCCACAAATAAAGCTATGGTGCTGCTAA
chr1	Cox8a	-	204402117	unassigned	none	0.770834	0.00082199	0.0731454	N	Not Sig	ncbiRefSeq		CCATCCTCAGTTTGTGTGGAAGCAGAAGCCCAGTGCAGGAGGACATGATGTATTTCTGGA
chr1	Cpeb1	-	135300047	unassigned	none	-0.222164	0.463059	1	N	Not Sig	ncbiRefSeq	cytoplasmic polyadenylation element binding protein 1 [Source:RGD Symbol;Acc:1310421]	TTGTCCCTGGAATCTCCTTCCCTGCTTGCTACCACACACCCCGGACAGACAAAACCACAA
chr1	Cpeb3	-	234749137	unassigned	AGTAAA	-0.0722183	0.903911	1	N	Not Sig	ncbiRefSeq	cytoplasmic polyadenylation element binding protein 3 [Source:RGD Symbol;Acc:1564670]	AATTTCCCGATGAGAAGTAAACACACGGAGATAGTGCTTAGCAAAAGATGACACGTGTCA
chr1	Cpsf7	+	207191865	3UTR	AATAAA	-0.0741214	0.729829	1	N	Not Sig	ncbiRefSeq	cleavage and polyadenylation specific factor 7 [Source:RGD Symbol;Acc:1305441]	GTTTGTCTTTCTGATAGGTTGAGAATTGTGTAATAAACTTGATGACGATGTCAATCTTTT
chr1	Cpt1a	+	200627059	3UTR	AATAAA	0.101038	0.86401	1	N	Not Sig	ncbiRefSeq	carnitine palmitoyltransferase 1A [Source:RGD Symbol;Acc:2396]	GAAGTGCATGTGTGAGCGAATGTAGCTGGCCATTAATAAAACATTAATACTGTCTACTAC
chr1	Cpt1c	-	95442813	unassigned	none	0.0309409	0.979471	1	N	Not Sig	ncbiRefSeq	carnitine palmitoyltransferase 1c [Source:RGD Symbol;Acc:1305384]	GGGGTGAAAGGGGTGCCCCATCCCCCCACTCCACCCATGCCTCGCAGAAGAGTACAGTGG
chr1	Cpxm2	-	186836796	unassigned	none	0.711307	0.434444	1	N	Not Sig	ncbiRefSeq	carboxypeptidase X (M14 family), member 2 [Source:RGD Symbol;Acc:1310955]	CTTAATGGCTATAGTCACAGAGGTACAAGGCACTGCATATCCGCCTGGAAAAACACATGA
chr1	Crebzf	+	144420804	intron	AATAAA	0.460962	0.887587	1	N	Not Sig	ncbiRefSeq	CREB/ATF bZIP transcription factor [Source:RGD Symbol;Acc:1565584]	TTTTGTGCAGAACCGATGACAAAAATATGGTGTCATAATAAAATCAGGTTTGTTGATCTT
chr1	Crebzf	+	144423538	3UTR	AATAAA	0.047685	0.872994	1	N	Not Sig	ncbiRefSeq	CREB/ATF bZIP transcription factor [Source:RGD Symbol;Acc:1565584]	CTTGCTAGGCACGCCATGGTATTTTTTTTCTTTCAATAAAAGCCTATTTAACACATCCAA
chr1	Crtac1	-	241091678	unassigned	none	-0.261182	0.763423	1	N	Not Sig	ncbiRefSeq	cartilage acidic protein 1 [Source:RGD Symbol;Acc:621085]	GCTAATATCCAGCAGATAGTTTATTGGCATAATTTCTCCAGAAAAAAGGCTGGAAGACTT
chr1	Crtac1	-	241092165	3UTR	none	-0.257106	0.822024	1	N	Not Sig	ncbiRefSeq	cartilage acidic protein 1 [Source:RGD Symbol;Acc:621085]	AATCTATTGGGTGTGGAGAGAGGTAGGCAGCAGGAGAGATATAGTTTTTCCACAAAGGTT
chr1	Crtc3	-	134552829	unassigned	none	-0.172843	0.715185	1	N	Not Sig	ncbiRefSeq	CREB regulated transcription coactivator 3 [Source:RGD Symbol;Acc:1309666]	AGGCAGCGGGAGAAGCGTCCCGCCCAGCTGCTGCACCCAAGACCAAAGAGAAACGCCAAG
chr1	Crym	-	174560422	unassigned	none	-0.153642	0.728826	1	N	Not Sig	ncbiRefSeq	crystallin, mu [Source:RGD Symbol;Acc:620943]	TGAGTGAGCATTTGACACCTTTATTTCCTTCCCACAGGAAGCTGTCAAAGTACACATGGA
chr1	Cst6	-	202655321	unassigned	AAGAAA	0.0293037	0.897155	1	N	Not Sig	ncbiRefSeq	cystatin E/M [Source:RGD Symbol;Acc:628799]	TGACAGTCCCTGGGAGTAGAGTGAAGGTCAGTCAGGGTAAGAAACACACAGGAGAAACCA
chr1	Cstf2t	+	228956182	3UTR	AATAAA	0.150869	0.53676	1	N	Not Sig	ncbiRefSeq	cleavage stimulation factor subunit 2, tau variant [Source:RGD Symbol;Acc:1310026]	TCTTTGTTATAAGAAAATCTCTGCATTGTTTCATGAAAATTAAATAAAAAGGTTATATAA
chr1	Ctbp2	-	187782063	unassigned	none	0.201876	0.623934	1	N	Not Sig	ncbiRefSeq	C-terminal binding protein 2 [Source:RGD Symbol;Acc:68372]	AGTGTGATGACATCTCAAGGGCTAGCTTTTACATAGGTGAGATGTACTTAAATGTCAGGA
chr1	Ctr9	+	165167301	3UTR	AATAAA	0.0179964	0.973263	1	N	Not Sig	ncbiRefSeq	CTR9 homolog, Paf1/RNA polymerase II complex component [Source:RGD Symbol;Acc:1311097]	TGTTGTTAGAGTGGGAAGAGCTTCCCAGCCGCTTAATAAACTCTTTACCAACTGTGCTGG
chr1	Ctsc	+	142041539	intron	AATAAA	0.081827	1	1	N	Not Sig	ncbiRefSeq	cathepsin C [Source:RGD Symbol;Acc:2445]	ACTTGGGTGTCTACCACTAGCAGTCTTTGAAATAAAAAGACAGCTCACTTAATAATTTGA
chr1	Ctsc	+	142059841	3UTR	AATAAA	0.0590069	1	1	N	Not Sig	ncbiRefSeq	cathepsin C [Source:RGD Symbol;Acc:2445]	GAATACATGGCCAAAATAGTTATTTTTTAAAGACTTTAAAATAAATGATTTAATCGATGC
chr1	Ctsd	-	197527466	unassigned	none	0.0207459	0.925838	1	N	Not Sig	ncbiRefSeq	cathepsin D [Source:RGD Symbol;Acc:621511]	AGCTACCTCCATCCCTAAGACCCCAATTCAGGAACAGTACAGAGCACACCAACAACAGAG
chr1	Ctsf	+	202158525	3UTR	AATAAA	0.0315752	0.873237	1	N	Not Sig	ncbiRefSeq	cathepsin F [Source:RGD Symbol;Acc:1308181]	TTTCCACATCCAGGAAAGTTGTAACCAGCCTTCCCTAAGAGCAATAAAAAGGTAGCCTGC
chr1	Cttn	-	199599709	unassigned	ACTAAA	0.159041	0.667464	1	N	Not Sig	ncbiRefSeq	cortactin [Source:RGD Symbol;Acc:619839]	CCCAGTGCCACCTTCAAATCAAAACATGGAGACTAACCACTGCAGAGGACCACACAGCAA
chr1	Cuedc2	-	245192056	unassigned	AATGAA	-0.0475324	0.959628	1	N	Not Sig	ncbiRefSeq	CUE domain containing 2 [Source:RGD Symbol;Acc:1308096]	GAAGCTGGTCAGACAGACATAGTATTTTCTTGCCCTGGGGCAGAAATCACTAGAATGAAC
chr1	Cutc	+	242635729	CDS	AATGAA	0.238204	0.898249	1	N	Not Sig	ncbiRefSeq	cutC copper transporter [Source:RGD Symbol;Acc:1304966]	CTGGAGCTACAGAATTCCACTGTTCTGCCCGATCTTCTAGAGACTCAGGAATGAAGTTTC
chr1	Cutc	+	242635830	intron	AATAAA	0.14862	1	1	N	Not Sig	ncbiRefSeq	cutC copper transporter [Source:RGD Symbol;Acc:1304966]	ATTAATCTTTGCTTAAATAAGAAAGCCTTAGCTGATGTCAATAAATAATGGAATACCGTG
chr1	Cutc	+	242637046	3UTR	AATAAA	0.050305	1	1	N	Not Sig	ncbiRefSeq	cutC copper transporter [Source:RGD Symbol;Acc:1304966]	TTTAGTGCCACTTTTGTGCCTTTTTGTTTTGTAAAATAAAAATTCTCCTTCTGTTGTGTT
chr1	Cwf19l1	-	242997719	unassigned	AATACA	0.120071	0.964588	1	N	Not Sig	ncbiRefSeq	CWF19 like cell cycle control factor 1 [Source:RGD Symbol;Acc:1304716]	AACTTTGGTCTCATATACACATACTTTCATTTCAGAGGCCATAAGCAACATAAGACATTT
chr1	Cxcl17	-	80984750	intron	ACTAAA	0.93143	0.84912	1	N	Not Sig	ncbiRefSeq	C-X-C motif chemokine ligand 17 [Source:RGD Symbol;Acc:1304717]	TTGTCTTAGATTGTTGCTCCGATCATTTTACACTCCCACTAAAACGTAAACAACACAAAG
chr1	Cyb561a3	+	207237574	3UTR	ATTAAA	-0.243684	0.803853	1	N	Not Sig	ncbiRefSeq	cytochrome b561 family, member A3 [Source:RGD Symbol;Acc:1304670]	ACTCATGAGTGGGTATTTTACCTCATGAATCTGACTCTTATTAAATGTTTTTAAACATTA
chr1	Cyb5r2	-	161655861	3UTR	none	-0.162895	0.837547	1	N	Not Sig	ncbiRefSeq	cytochrome b5 reductase 2 [Source:RGD Symbol;Acc:1308421]	ACCCCACACTAGCAAGTCCTGGCTTGCCCAGAGTATTTTCTACATATCCACGCATTATGA
chr1	Cyfip1	+	106799392	3UTR	AATAAA	0.0927384	0.712319	1	N	Not Sig	ncbiRefSeq	cytoplasmic FMR1 interacting protein 1 [Source:RGD Symbol;Acc:1310332]	CTGTGAGTCTGATTCGTGAGATATGACTTAACGATTAGAGAAATAAAAATCAATGGAATC
chr1	Cyp2r1	-	168780366	intron	AATAAA	-1.04711	0.457371	1	N	Not Sig	ncbiRefSeq	cytochrome P450, family 2, subfamily r, polypeptide 1 [Source:RGD Symbol;Acc:1311866]	AAGTAAAACACCTCTGTGACAAGAGCTTCAAGTCTTTGAAGAAATAAACTTAAGATGATA
chr1	Cyp2s1	-	81309947	unassigned	AACAAA	-0.499676	0.661343	1	N	Not Sig	ncbiRefSeq	cytochrome P450, family 2, subfamily s, polypeptide 1 [Source:RGD Symbol;Acc:1306078]	AAGACAACGCATGTTCAATTATTTTCTAATTTTTTCTTAAAATAACCGTAACAAAGAGTG
chr1	Cyp2t1	+	82451564	3UTR	AATACA	-0.223276	0.876406	1	N	Not Sig	ncbiRefSeq	cytochrome P450, family 2, subfamily t, polypeptide 1 [Source:RGD Symbol;Acc:620086]	CTGCCCTAACTGTACGTGTGAATCTCTTTACGGAGAGGAATACAAGTGTGTGCAGCTCTG
chr1	Cyth2	-	96284251	unassigned	AAGAAA	0.0417185	0.845716	1	N	Not Sig	ncbiRefSeq	cytohesin 2 [Source:RGD Symbol;Acc:620398]	CTGGTTAATGTCAGGAGGATGGGTTCTCAGCTCTCCCAAACCCAAGAAATGAGGGCATCT
chr1	Dact2	-	55181022	unassigned	none	-0.171142	0.992385	1	N	Not Sig	ncbiRefSeq	dishevelled-binding antagonist of beta-catenin 2 [Source:RGD Symbol;Acc:1310742]	GCCTCTCCTGCCTCAGGTTCACACACGTCTCATGTTGGGAAGGAAGAGACATGACAGTGG
chr1	Dact3	+	77558630	3UTR	AATAAA	-0.0263449	0.920206	1	N	Not Sig	ncbiRefSeq	dishevelled-binding antagonist of beta-catenin 3 [Source:RGD Symbol;Acc:1563892]	GGGGGGCCAGATTCTGTGTGTTTCTCTAACCTCTTTGTAAATAAATGCACAATGTTACAT
chr1	Dagla	-	206890634	unassigned	none	0.0147076	0.79838	1	N	Not Sig	ncbiRefSeq	diacylglycerol lipase, alpha [Source:RGD Symbol;Acc:1359461]	ACACTCCCTTACCCTGCTGCCTCCACCCCAGCTGAGGGAGAGAGACCACAGGAGACAGAG
chr1	Dbp	+	96180743	3UTR	AATAAA	-0.215034	0.85657	1	N	Not Sig	ncbiRefSeq	D-box binding PAR bZIP transcription factor [Source:RGD Symbol;Acc:2491]	AGGAACCCATCCATCCAACCGCCTCCATCAACACAATCCTGAATAAATCTTGAGAACCCA
chr1	Dchs1	-	160104930	unassigned	AACAAA	0.336895	0.647995	1	N	Not Sig	ncbiRefSeq	dachsous cadherin-related 1 [Source:RGD Symbol;Acc:1309878]	CAGGTATCCACAGTGCTATGCCAGTGACTTCTGGTTACCCTGACAGAACAAAGCCAGAGG
chr1	Dclre1a	-	255569910	unassigned	AAGAAA	-0.327137	0.69067	1	N	Not Sig	ncbiRefSeq	DNA cross-link repair 1A [Source:RGD Symbol;Acc:1306156]	AAGCTGCTCTAAAAAAGTTTACTAAAAAGAAAATAAGCCAACAACGAAACCCATCCAGAG
chr1	Dclre1a	-	255578418	exon	GATAAA	0.0728101	1	1	N	Not Sig	ncbiRefSeq	DNA cross-link repair 1A [Source:RGD Symbol;Acc:1306156]	ATTTCTTAGAGTTCTATTAGGATAAATACCTTTCCAGTGCTTACCTTAAAATTGATTTGC
chr1	Dctn3l1	-	5526815	unassigned	none	-0.544687	0.775637	1	N	Not Sig	ncbiRefSeq		GCATGCCGAGTGTCTCAGCCTTGTAGGATAGAGTGGTGCTCTCTTTCTTTTCGATCCAGA
chr1	Dctn5	+	176705737	3UTR	none	-0.775763	0.113592	1	N	Not Sig	ncbiRefSeq	dynactin subunit 5 [Source:RGD Symbol;Acc:1305654]	ACAGGCTGTGGTGACTTGTACCAGTCATCCAAGTACCTTGGAGGTAGAAGCAGGAGGAGT
chr1	Dctn5	+	176705905	3UTR	AATAAA	-0.0743054	0.729372	1	N	Not Sig	ncbiRefSeq	dynactin subunit 5 [Source:RGD Symbol;Acc:1305654]	CTGTTGTTCATTCAGGATGACCTTAATTGTTATAAAGTAGTTAATAAAAGACTTAAAACA
chr1	Dctpp1	-	181877439	unassigned	AAGAAA	-0.00292099	1	1	N	Not Sig	ncbiRefSeq	dCTP pyrophosphatase 1 [Source:RGD Symbol;Acc:620933]	CCTGCTTCTCTGCAGGATTTGAGATATTTTGTCTAGGTTCTCAAGAAAAATCCAAACATT
chr1	Dcun1d3	-	174243000	intron	AATAAA	0.0723681	0.91632	1	N	Not Sig	ncbiRefSeq	defective in cullin neddylation 1 domain containing 3 [Source:RGD Symbol;Acc:1308893]	CCCAATGGGTTGATAAACTACTTCAGAATAAATTCACTGTTTTTTGTTTTCTGCAGAAAT
chr1	Dcun1d3	-	174245646	3UTR	AATAGA	0.97367	0.106778	1	N	Not Sig	ncbiRefSeq	defective in cullin neddylation 1 domain containing 3 [Source:RGD Symbol;Acc:1308893]	GATTTGGGGCAGACTAATCAAGGAAGAAAATTCCAAATATTTAATAGACACTTTTTCATT
chr1	Ddb1	+	207278685	3UTR	AATAAA	0.0249154	0.947229	1	N	Not Sig	ncbiRefSeq	damage-specific DNA binding protein 1 [Source:RGD Symbol;Acc:621889]	GGGCTGTGAATTGGTTGTTAGTTTCTGAATTTTACCAAATAAAGTAGAATCTAAGAAGAA
chr1	Deaf1	-	196401856	unassigned	TATAAA	-0.11268	0.896506	1	N	Not Sig	ncbiRefSeq	DEAF1 transcription factor [Source:RGD Symbol;Acc:620671]	GCCTCAGCAAAGCCCTCTGGTCTGGTCGTTTGAATATAAAGTGGGCTCGGCAGCGGCCAG
chr1	Dedd2	-	80789083	unassigned	AATAAG	0.232765	0.916508	1	N	Not Sig	ncbiRefSeq	death effector domain containing 2 [Source:RGD Symbol;Acc:1588968]	TACAAACACACTGACTCCCTCGCAGCATAGCAGTGAGCAAAATAAGACACGACACAAGAC
chr1	Dedd2	-	80791991	3UTR	AACAAA	-1.06175	0.320557	1	N	Not Sig	ncbiRefSeq	death effector domain containing 2 [Source:RGD Symbol;Acc:1588968]	ATCATGCTCTTCTCCAGCCTTTCCCCTCGTCGACCAACAAAGGTACCGGAGAGCCTCGAC
chr1	Dennd10	+	259973593	3UTR	CATAAA	0.710632	0.62835	1	N	Not Sig	ncbiRefSeq	DENN domain containing 10 [Source:RGD Symbol;Acc:1308326]	ACCATAAACATAAGCTCGTTTTCAGAAAGCCGTCTCAAAGTTTGCTTTTTTATTCTTCTA
chr1	Dennd10	+	259974455	3UTR	TATAAA	-0.0209541	0.809834	1	N	Not Sig	ncbiRefSeq	DENN domain containing 10 [Source:RGD Symbol;Acc:1308326]	ACTTGACATACGTTGTTTACTGGAGCTAACAACTGAAGATTAAATTTGCACTTTATAAAA
chr1	Dennd2b	-	163544074	unassigned	AAGAAA	-0.0449697	0.87374	1	N	Not Sig	ncbiRefSeq	DENN domain containing 2B [Source:RGD Symbol;Acc:1308995]	CCTGTATCCATCCAGAATTCACCTGGTTTTGAGAAAACTGAAGAAAGTGAAACAGGAACA
chr1	Dennd2b	-	163547337	CDS	none	0.688942	0.998887	1	N	Not Sig	ncbiRefSeq	DENN domain containing 2B [Source:RGD Symbol;Acc:1308995]	AGTGCCTTCCCTGGGGCAGCCCAGGTTTTGTATATGCTGCTCTTACCTGTCGGATGAATC
chr1	Dennd5a	-	163928182	unassigned	none	-0.125182	0.851867	1	N	Not Sig	ncbiRefSeq	DENN domain containing 5A [Source:RGD Symbol;Acc:1306759]	AGGCAGGCCACACTGTACCTTCCACAACGCATACACCCATGAAAGCCAGTGACCAGAGAG
chr1	Det1	-	132749735	unassigned	none	1.13544	0.615471	1	N	Not Sig	ncbiRefSeq	DET1 partner of COP1 E3 ubiquitin ligase [Source:RGD Symbol;Acc:1309793]	CCCCTCTCCCCGAGTATGGAGAAAGCACTGGTGTGAGGGAAACATCAAGCAAGAGACGGT
chr1	Dgat2	-	153454077	intron	none	0.909164	0.00700549	0.365675	N	Not Sig	ncbiRefSeq	diacylglycerol O-acyltransferase 2 [Source:RGD Symbol;Acc:620329]	CTCGAAGTGCGCCCTGTGCAGTGGGATAGACAGTGTGAGTACAGCATTAAGCAACAACGC
chr1	Dhcr7	+	199031052	3UTR	ATTAAA	0.157383	0.724762	1	N	Not Sig	ncbiRefSeq	7-dehydrocholesterol reductase [Source:RGD Symbol;Acc:621769]	ACTAGATAGGCTCATGTTAGCCTTGCAAGCGGTTCTTTGTATTAAATCTGCCTTGTTAAA
chr1	Dhdh	-	95954360	unassigned	none	0.612836	0.53392	1	N	Not Sig	ncbiRefSeq	dihydrodiol dehydrogenase [Source:RGD Symbol;Acc:1588686]	AATGTAACCACATTGTAATTTCTAAACTTTTTTTCAATGAGTTTGCTGGGGGATATGGAG
chr1	Dhx32	-	188524511	intron	ATTACA	0.0974382	0.825859	1	N	Not Sig	ncbiRefSeq	DEAH-box helicase 32 (putative) [Source:RGD Symbol;Acc:1311740]	TCTTTATTTGGGTAAGTGAGCTCTGCCTCTGTGTTGATTACATTTCCCTCTGTGTCTCCT
chr1	Dhx34	-	76880866	unassigned	AATAAA	-1.49624	0.433033	1	N	Not Sig	ncbiRefSeq	DExH-box helicase 34 [Source:RGD Symbol;Acc:1584452]	TGGGAGGCTTGTGAAGGGGGATAATGTTTGAAATGTAAATAAATAAAATAATTAATTTTT
chr1	Dkk3	-	166237968	unassigned	AATAAA	-0.195957	0.583112	1	N	Not Sig	ncbiRefSeq	dickkopf WNT signaling pathway inhibitor 3 [Source:RGD Symbol;Acc:621846]	TGTGAAATGCCACCTGTATGTGTTACTGTTCAATTACTCTAATAAAACACCAGAACCAAA
chr1	Dkk3	-	166239870	3UTR	none	0.0607635	0.942724	1	N	Not Sig	ncbiRefSeq	dickkopf WNT signaling pathway inhibitor 3 [Source:RGD Symbol;Acc:621846]	ATACAGCAAATCCTAACCAGCACAGGTTTTAGTGACAAATGGACCCATACCACAGACACA
chr1	Dkk3	-	166240821	3UTR	AGTAAA	0.208171	0.910563	1	N	Not Sig	ncbiRefSeq	dickkopf WNT signaling pathway inhibitor 3 [Source:RGD Symbol;Acc:621846]	TCAGACTCTAAATGAGGTGAGCTGCAGATGCCTGGAAAATCTGCTTCTATGGAATTTTAA
chr1	Dlg2	+	146503805	3UTR	AATAAA	-0.00904358	0.825643	1	N	Not Sig	ncbiRefSeq	discs large MAGUK scaffold protein 2 [Source:RGD Symbol;Acc:619895]	CATTCCATTTGTGTAAAAAATAAAGCACACACGATTATAAAATCAAGATGTATATTTCAT
chr1	Dlg2	+	146503949	3UTR	TATAAA	-0.478264	0.348556	1	N	Not Sig	ncbiRefSeq	discs large MAGUK scaffold protein 2 [Source:RGD Symbol;Acc:619895]	TAAACATGCCGTGGTTTTCTTATATAAATATTAAAACAATTTCTACTTTATAGCAAAATT
chr1	Dll1	-	56312061	unassigned	none	-0.864056	0.325063	1	N	Not Sig	ncbiRefSeq	delta like canonical Notch ligand 1 [Source:RGD Symbol;Acc:70949]	TGCCGCCTCTCTTCTTGTGAATTGGATGCCTGGGTGGATGACTGAAGAGTAACACCCGAG
chr1	Dmac2	+	81132532	intron	none	0.105123	0.913981	1	N	Not Sig	ncbiRefSeq	distal membrane arm assembly component 2 [Source:RGD Symbol;Acc:1549698]	GACCCTGTCTCAGAAGAGAAAGTCTTTTTGAATCTTCTCCTTCCTTCCTTGTTTTCCTGA
chr1	Dmac2	+	81134329	3UTR	AATACA	-0.226669	0.66243	1	N	Not Sig	ncbiRefSeq	distal membrane arm assembly component 2 [Source:RGD Symbol;Acc:1549698]	TCTGTCATGACTCCAATACACCACTGAAATGTGTGGTTCTTTAAATTTCCGCTATCACAT
chr1	Dmac2	+	81134810	3UTR	ATTAAA	0.0904211	0.922559	1	N	Not Sig	ncbiRefSeq	distal membrane arm assembly component 2 [Source:RGD Symbol;Acc:1549698]	CCTTGACTGGGCCCCGGCTTTGAAAGGAATGCCCATTATTAAAGATTTATTTGTTCATTT
chr1	Dmpk	+	78740584	3UTR	AATAAA	0.306756	0.631881	1	N	Not Sig	ncbiRefSeq	DM1 protein kinase [Source:RGD Symbol;Acc:1309825]	GTCCCCACCTACGACCTCCACTCCTGACCCTCGCAAATAAAATACTTCTGGCTGCCCTAA
chr1	Dmwd	+	78728477	CDS	none	0.0331556	1	1	N	Not Sig	ncbiRefSeq	DM1 locus, WD repeat containing [Source:RGD Symbol;Acc:1594179]	CCCTAGTTCACAGACGAGGAGACCGAGACCCAGGCAGGGGAAGCAAGTTGGCCCAGGTCA
chr1	Dmwd	+	78729224	3UTR	ACTAAA	0.243078	0.323589	1	N	Not Sig	ncbiRefSeq	DM1 locus, WD repeat containing [Source:RGD Symbol;Acc:1594179]	CGCCCCCAGGGCCCTCCTTGTCCCCTTAGCCCTCTTATTTATACTAAAGTCCTTGTTTGC
chr1	Dnaaf3	+	69299364	3UTR	AATAAA	-0.764546	0.570818	1	N	Not Sig	ncbiRefSeq	dynein, axonemal, assembly factor 3 [Source:RGD Symbol;Acc:2323487]	GTTGGAGGGACAAGGACATATCCTCCCTTGGATGCGGTTCAAATAAAGAGCGCAGGGTCA
chr1	Dnajb13	-	154848585	unassigned	AAGAAA	0.261223	0.664437	1	N	Not Sig	ncbiRefSeq	DnaJ heat shock protein family (Hsp40) member B13 [Source:RGD Symbol;Acc:1359131]	GTCTACAAAGCAAGTTCCAGAACAGCCAGGGCTACAAAGAAATCCTGTCTCAGAAAAAAA
chr1	Dnajb13	-	154849744	3UTR	none	0.235427	0.64379	1	N	Not Sig	ncbiRefSeq	DnaJ heat shock protein family (Hsp40) member B13 [Source:RGD Symbol;Acc:1359131]	CCAGGTGCCTAGCTTTTTGGTTCCTAGAGGTAACATCCCCCCGACTCGCTTCCCGTCATA
chr1	Dnajc4	-	204178188	unassigned	none	0.0640868	1	1	N	Not Sig	ncbiRefSeq	DnaJ heat shock protein family (Hsp40) member C4 [Source:RGD Symbol;Acc:1308693]	AGGGTCGCTGCCTCACGAGGGGAGGGATGAGGAGATGAGTGACCTGAAGGACCGAGTCGG
chr1	Dnmbp	-	242736188	unassigned	none	-1.00754	0.226127	1	N	Not Sig	ncbiRefSeq	dynamin binding protein [Source:RGD Symbol;Acc:1583840]	CTTTGGCTCAGCAGGGCAAAGATGAGAAAAAAGGCTCAGATTCAAGATGAAGGAAACACA
chr1	Doc2a	+	181462528	3UTR	AATAAA	0.304788	0.373789	1	N	Not Sig	ncbiRefSeq	double C2 domain alpha [Source:RGD Symbol;Acc:620518]	TTCTGATTGTGTCAGTGGCCGAAGCATGGCAACTGGGCATCAATAAACATCTCTTGAGGA
chr1	Doc2g	+	201299865	3UTR	AATAAA	0.100464	1	1	N	Not Sig	ncbiRefSeq	double C2-like domains, gamma [Source:RGD Symbol;Acc:1307473]	TTCTTGTCTCCTTCCACTCATGCAACCCCAAACACAAGCAAAATAAACACCTGCTTCTGC
chr1	Dock1	+	189983775	3UTR	AATAAA	0.103744	0.777914	1	N	Not Sig	ncbiRefSeq	dedicator of cyto-kinesis 1 [Source:RGD Symbol;Acc:1566072]	TGTTCTAGGAGAGTTCAAAGTTAATCACTGACGAATGAAAAATAAATGTTATTTAAAAAG
chr1	Dock8	+	222842471	3UTR	AATAAA	-0.522881	0.580736	1	N	Not Sig	ncbiRefSeq	dedicator of cytokinesis 8 [Source:RGD Symbol;Acc:1561588]	CTCATAAATAAATAAATAAATAAATAAATAAATAAATAAATAAATCAATCAATCAATCAA
chr1	Dpcd	+	244426040	3UTR	AAGAAA	-1.11726	0.662766	1	N	Not Sig	ncbiRefSeq	deleted in primary ciliary dyskinesia [Source:RGD Symbol;Acc:1307648]	TAAAGAAGGTAAAGACAGCGCACAGCAGTGATGGGGACTGCAAGACGCAGTAGCTACTGA
chr1	Dpcd	+	244426224	3UTR	AGTAAA	0.0316881	0.953268	1	N	Not Sig	ncbiRefSeq	deleted in primary ciliary dyskinesia [Source:RGD Symbol;Acc:1307648]	CCACCTGTGGTTTTATCCTGAGTAAAGTCATTTGCAGTTGTTCTGGAAGGACTGACTGCC
chr1	Dpcd	+	244426889	3UTR	AATAAA	-0.130482	0.572271	1	N	Not Sig	ncbiRefSeq	deleted in primary ciliary dyskinesia [Source:RGD Symbol;Acc:1307648]	ACAGCTGCAGTGTACGCATATACATTAAATAAATCTTAAAAAAAAAATGACCTAACCATC
chr1	Dpf1	+	84615201	3UTR	AAGAAA	-0.35462	0.597202	1	N	Not Sig	ncbiRefSeq	double PHD fingers 1 [Source:RGD Symbol;Acc:61868]	AGCCTTTTTCTAAAGAAAAAGACAAAACGTGAAAAAAAAAAAAGGAAAAAAAAAAAGAAA
chr1	Dpf1	+	84615954	3UTR	ATTAAA	-0.204174	0.85379	1	N	Not Sig	ncbiRefSeq	double PHD fingers 1 [Source:RGD Symbol;Acc:61868]	TGCTGTGAATTAACTTGTTCTGTGTATTAAACTGGGCCGGACCCCTCTGCCCACAACTGC
chr1	Dpf2	-	203183673	unassigned	AATGAA	-0.0793567	0.677829	1	N	Not Sig	ncbiRefSeq	double PHD fingers 2 [Source:RGD Symbol;Acc:1311699]	TCCTAACTAAGTAAGTCTGAAATGAAATGACCTTTCAACAAGGAGTCAGGAACAAACAGT
chr1	Dpp3	-	202204682	unassigned	AAGAAA	0.0372537	1	1	N	Not Sig	ncbiRefSeq	dipeptidylpeptidase 3 [Source:RGD Symbol;Acc:621127]	GAAGCCAAAAGTGATGTACTGTGCTTTGAACCGAAAGATGAAGAAACACACACATTGCAA
chr1	Dpy19l3	-	88350302	unassigned	none	-0.118246	0.672497	1	N	Not Sig	ncbiRefSeq	dpy-19 like C-mannosyltransferase 3 [Source:RGD Symbol;Acc:1308334]	CCTATTAGCAGAGACCTCCGCCTCCTCCAGCTCGACCTTCAAAGCAACAGAAGACACCAC
chr1	Dpysl4	+	193898914	3UTR	AATAAA	0.115147	0.774982	1	N	Not Sig	ncbiRefSeq	dihydropyrimidinase-like 4 [Source:RGD Symbol;Acc:2409]	TACCAGACACCGGCCACCGGCCAAGCTGATTTGAGTCAGGTCAATAAAAAGTCTGGGTTC
chr1	Drap1	-	202731774	unassigned	none	-0.143533	0.964655	1	N	Not Sig	ncbiRefSeq	Dr1 associated protein 1 [Source:RGD Symbol;Acc:1308477]	TACCCGTCTCTTCACTGTGCCGAGCCCGTCACTGCACTGGCTGCAGAACACTATACTTTT
chr1	Drap1	-	202732270	3UTR	AAGAAA	0.198124	0.719571	1	N	Not Sig	ncbiRefSeq	Dr1 associated protein 1 [Source:RGD Symbol;Acc:1308477]	GTGGGGGGATGGGCAATACAGCCACGAAGCCCTGGACACAGGATGAAAAGAAACCAAAAT
chr1	Dtx4	-	209457718	unassigned	none	-0.316176	0.580043	1	N	Not Sig	ncbiRefSeq	deltex E3 ubiquitin ligase 4 [Source:RGD Symbol;Acc:1311767]	GTGCTTCTGCGACAGGTGCCCAAGCATGTCTACAAAAGCAGGCCCTGAGGAGTAACAACA
chr1	Dusp5	+	252551878	3UTR	AATAAA	5.82962	8.01433e-15	4.40482e-12	Y	FDR<0.05	ncbiRefSeq	dual specificity phosphatase 5 [Source:RGD Symbol;Acc:620854]	ATATATACATGTAGTACAAAATTAAAAAAATGTCAAAAAATAAAAAGTGCTTGTTCTTGT
chr1	Dusp8	-	197167391	unassigned	AAGAAA	0.0758267	0.649694	1	N	Not Sig	ncbiRefSeq	dual specificity phosphatase 8 [Source:RGD Symbol;Acc:1306425]	GCCCCCTAGTGCCCAACCTCTCCCACAACCAACCCTAAGAAAGAGTCAGCAGAGGCCTGA
chr1	Dynlt1	-	46887016	unassigned	none	-0.00572612	0.984942	1	N	Not Sig	ncbiRefSeq	dynein light chain Tctex-type 1 [Source:RGD Symbol;Acc:620261]	AATTCTGAAGGCAGTAGCCACAGGTTCTCGTGTTACTCCAAGCTACAAAGGACACAAAAA
chr1	Ech1	+	84119789	intron	none	-2.54619	0.128253	1	N	Not Sig	ncbiRefSeq	enoyl-CoA hydratase 1 [Source:RGD Symbol;Acc:69353]	CTTAGGCAATGAGTAATGCCTGGAGCTCGCGTGGGAGCTCGTATGGGAAGCAACAGGCAA
chr1	Ech1	+	84120786	3UTR	AACAAG	-0.192299	0.650235	1	N	Not Sig	ncbiRefSeq	enoyl-CoA hydratase 1 [Source:RGD Symbol;Acc:69353]	TGTATAACTTTATGACTTAGTTCTTCAGTTCCCGGGGCCTTATCTCCACTGTGAACAATA
chr1	Echdc1	-	28476353	unassigned	AATAAG	-0.0382052	0.835227	1	N	Not Sig	ncbiRefSeq	ethylmalonyl-CoA decarboxylase 1 [Source:RGD Symbol;Acc:1359654]	GAAACTGGCTAGGAGAAGTTAATTCTTACACAGTTTTAATAAGTGAATTCTGAAATGGAC
chr1	Echdc1	-	28485626	intron	ACTAAA	0.0617941	0.93779	1	N	Not Sig	ncbiRefSeq	ethylmalonyl-CoA decarboxylase 1 [Source:RGD Symbol;Acc:1359654]	ACCATTCCATCCAGCTCGAAGTCCAGTGGATAGACCTTTTGAAATCAACATACAGTAGAG
chr1	Echs1	-	194895035	unassigned	AATAAA	0.011939	0.854444	1	N	Not Sig	ncbiRefSeq	enoyl-CoA hydratase, short chain 1 [Source:RGD Symbol;Acc:69330]	TAAGACAAATAAATCTTTAAAAAAAAAGATGGTGAAGTTAAAAACACACAAACAGTCATG
chr1	Edrf1	+	188466268	CDS	none	0.401249	0.91622	1	N	Not Sig	ncbiRefSeq	erythroid differentiation regulatory factor 1 [Source:RGD Symbol;Acc:1306820]	GCGCACTGTGGTGCAGAGGATGAGTTCAAACGGGAGTTCTCCCCAGAAGAGGGCTTGTAT
chr1	Edrf1	+	188478743	3UTR	ATTAAA	0.700495	0.192717	1	N	Not Sig	ncbiRefSeq	erythroid differentiation regulatory factor 1 [Source:RGD Symbol;Acc:1306820]	ATACTTTTCAAATGTGTTGTAATAACTTGTGTTGGTTTTAATTAAAGTTTCCTGAAGTAA
chr1	Eed	-	143867874	unassigned	AGTAAA	-0.0721776	0.786529	1	N	Not Sig	ncbiRefSeq	embryonic ectoderm development [Source:RGD Symbol;Acc:1309782]	TTTACACTTAAGACTTCATAGTAAATAGCTTTCTCTAGTTAAAGTAAACATTACAAGAAG
chr1	Eef1akmt2	-	187616830	intron	CATAAA	0.204868	0.690788	1	N	Not Sig	ncbiRefSeq	EEF1A lysine methyltransferase 2 [Source:RGD Symbol;Acc:1306300]	TGGTCAAGTCTTCATAAATAGCTATAGTCAACTGGATCAAAGTACAAACACCAAAAACAG
chr1	Eef1g	+	205871317	3UTR	ATTAAA	-0.0129626	0.936627	1	N	Not Sig	ncbiRefSeq	eukaryotic translation elongation factor 1 gamma [Source:RGD Symbol;Acc:1302939]	CCTAGCTGCCTGCACCTATCCTTCAAGGGAGATGGGGGTCATTAAAGGAAACTGAACATT
chr1	Eef2k	+	175452944	3UTR	TATAAA	0.246912	0.883852	1	N	Not Sig	ncbiRefSeq	eukaryotic elongation factor-2 kinase [Source:RGD Symbol;Acc:2538]	CCATTTCTTTTGGGAGGGGAGAAGTAGTTTTACTATGGTATAAATTCACTTTTGTATTGC
chr1	Eef2k	+	175454452	3UTR	none	-0.638908	0.63586	1	N	Not Sig	ncbiRefSeq	eukaryotic elongation factor-2 kinase [Source:RGD Symbol;Acc:2538]	TCTCTCTCTCTCTCACACACACACACACACACACACACACACACACACACACACACAAAA
chr1	Efemp2	+	202789414	3UTR	AATAAA	0.476852	0.784005	1	N	Not Sig	ncbiRefSeq	EGF containing fibulin extracellular matrix protein 2 [Source:RGD Symbol;Acc:1359496]	GGATGACTGTTCTGTTTAAAGGGACTATGATGTGAAGGACAATAAAGGGAGAAAGAAGGA
chr1	Efemp2	+	202789784	3UTR	AATACA	0.602964	0.900818	1	N	Not Sig	ncbiRefSeq	EGF containing fibulin extracellular matrix protein 2 [Source:RGD Symbol;Acc:1359496]	TCAAACTATTTGACCAGGGCCGTCTAATTACACTCAAAAATACAGTACCCTATTGACTCC
chr1	Efl1	+	136763518	3UTR	AATAAA	-0.0718713	0.992329	1	N	Not Sig	ncbiRefSeq	elongation factor like GTPase 1 [Source:RGD Symbol;Acc:1306521]	ATTCACTTTCAATAATAAATATGGTCTATATATTTTAAAGATGTCAGAGAACATACTTTC
chr1	Egln2	-	82451553	3UTR	AATACA	0.0953217	0.699275	1	N	Not Sig	ncbiRefSeq	egl-9 family hypoxia-inducible factor 2 [Source:RGD Symbol;Acc:631376]	TGATATCCTCACTGCCCTAACTGTACGTGTGAATCTCTTTACGGAGAGGAATACAAGTGT
chr1	Ehbp1l1	-	202994114	unassigned	none	0.063596	0.867561	1	N	Not Sig	ncbiRefSeq	EH domain binding protein 1-like 1 [Source:RGD Symbol;Acc:1563823]	TTAGCCTAAGTCCCACCCTCTTCCTCCCATTGAAGCCCTACTGAGTAAGGGCAGGCACTG
chr1	Ehbp1l1	-	202996587	CDS	none	0.101857	0.872704	1	N	Not Sig	ncbiRefSeq	EH domain binding protein 1-like 1 [Source:RGD Symbol;Acc:1563823]	CCAGCAGGGTGGGTGAGCAGACAGAGAGGAGGCTTAGAGCCCAGACTCACAGCAGCTGCA
chr1	Ehbp1l1	-	203003426	exon	ACTAAA	0.289444	0.476541	1	N	Not Sig	ncbiRefSeq	EH domain binding protein 1-like 1 [Source:RGD Symbol;Acc:1563823]	GCCTCTTCTTTAGCAAATCAGCGTCACGCACGTGGGAGAAAGAGCCATGTGCTCGGGGTG
chr1	Ehd1	+	203602225	3UTR	ATTAAA	-0.0708249	0.805613	1	N	Not Sig	ncbiRefSeq	EH-domain containing 1 [Source:RGD Symbol;Acc:1309017]	TGTGGGGAGAGTGGCTGAGTGAGGACTGTTTCTTGCATTAAAGAAAGTTTAATTGTGCCA
chr1	Ehd2	-	76639567	unassigned	AATAGA	-0.415378	0.598388	1	N	Not Sig	ncbiRefSeq	EH-domain containing 2 [Source:RGD Symbol;Acc:1560856]	GAATGGTCCCCCAGGCACCTCTTCCTTAGGGGTCCCCGCCCCAAGATAACCTGACAGCGA
chr1	Eid2	+	83539599	3UTR	GATAAA	0.773073	0.263583	1	N	Not Sig	ncbiRefSeq		CGAATGGCAAGCAACATGAATAATTGTATATAGTATGTGATAAATTGTGTTTTCAAACAT
chr1	Eid2	+	83542262	3UTR	AATAAA	-0.871937	0.206618	1	N	Not Sig	ncbiRefSeq		AGAGAAGCCCTGTGTCAATAAATGATAAATAAAAAGATACAGAAGTTCATTTCTATCCAA
chr1	Eid2b	+	83547337	3UTR	AATGAA	-0.157086	0.907957	1	N	Not Sig	ncbiRefSeq	EP300 interacting inhibitor of differentiation 2B [Source:RGD Symbol;Acc:9381183]	CCTTAATGACTACTATCGGAGTCTGTATCTTAACTTATCTAATGAACTAGTTGTCTTCTG
chr1	Eif1ad	+	202678316	3UTR	ATTAAA	-0.0201353	0.979863	1	N	Not Sig	ncbiRefSeq	eukaryotic translation initiation factor 1A domain containing [Source:RGD Symbol;Acc:1304686]	AGCATGGCCCCTTTCTGAACTGACATAAAAAGAATTAAACCCCTGGTGGGTAGTGACTTA
chr1	Eif1ad	+	202679661	3UTR	AATAAA	-0.196251	0.695596	1	N	Not Sig	ncbiRefSeq	eukaryotic translation initiation factor 1A domain containing [Source:RGD Symbol;Acc:1304686]	ACACATGTATAAAATATAGGTGTATATACATGGAGAAATAAACCATATGGGTTAAAGAGA
chr1	Eif3a	-	259902766	unassigned	AATAAA	0.067397	0.803402	1	N	Not Sig	ncbiRefSeq	eukaryotic translation initiation factor 3, subunit A [Source:RGD Symbol;Acc:1307269]	ACCAAAGAAATAAAACACAGCAGCAAGTTCTGTGTTGGCTTCAATAAGACCAAATGGTTA
chr1	Eif3c	-	181134603	unassigned	AACAAG	0.11628	0.811092	1	N	Not Sig	ncbiRefSeq	eukaryotic translation initiation factor 3, subunit C [Source:RGD Symbol;Acc:1308871]	CATAATTGGCAAGTGAGTCCAAAATAGCTGTGTGGCAACAAGCAGACAACAAGCAACTAT
chr1	Eif3f	+	162943203	3UTR	AATAAA	0.0539479	0.772188	1	N	Not Sig	ncbiRefSeq	eukaryotic translation initiation factor 3, subunit F [Source:RGD Symbol;Acc:1306112]	ACAGTGACTCAATCAGCTCCTTGTGACTCCAAATAAACAGAGCTTAACCTTTTGTAAATG
chr1	Eif3k	-	84260124	unassigned	none	0.139194	0.802326	1	N	Not Sig	ncbiRefSeq	eukaryotic translation initiation factor 3, subunit K [Source:RGD Symbol;Acc:1309221]	GGGAAGGGCCCCAGCTCAGGTCACAAGTTGGCTCTCTGAGGGCAGAGGCAGGAGACAACA
chr1	Eif3k	-	84264502	exon	none	0.306222	0.926256	1	N	Not Sig	ncbiRefSeq	eukaryotic translation initiation factor 3, subunit K [Source:RGD Symbol;Acc:1309221]	CTGCAGACCTGGCATGATGGGGCTTGGGACCTACAGGCTTCCATCCTCCCCAGGCTCCAG
chr1	Eif4g2	-	165181432	unassigned	AAGAAA	-0.0162592	0.971312	1	N	Not Sig	ncbiRefSeq	eukaryotic translation initiation factor 4, gamma 2 [Source:RGD Symbol;Acc:1305294]	GGGTTGGAGGCATTGTGCAATGCTAGGATCAAGTGGTGTAACAAAAGAAGAAAAACCCAG
chr1	Eif4g2	-	165182640	3UTR	AACAAA	0.227985	0.681934	1	N	Not Sig	ncbiRefSeq	eukaryotic translation initiation factor 4, gamma 2 [Source:RGD Symbol;Acc:1305294]	AAACAAAGTGAACAATTCTCCAGAACTTTGCAGATACTATTTGAAGTCATGTACAACTAC
chr1	Emc10	-	94980259	unassigned	AGTAAA	0.0395904	1	1	N	Not Sig	ncbiRefSeq	ER membrane protein complex subunit 10 [Source:RGD Symbol;Acc:1303214]	ACATCTCCCAAACCCACCCACCCGTCTCCCCCTCCCCAAAATGAGAGGCCACACAAGTGT
chr1	Eml2	+	78859343	3UTR	AATACA	-0.00339844	0.858115	1	N	Not Sig	ncbiRefSeq	EMAP like 2 [Source:RGD Symbol;Acc:621066]	GGGTATTTTTTTTTAAGTTTATTCTTTTATATCATTCAGAAATACAGACTTATGCACTGA
chr1	Eml3	+	205837790	3UTR	AATAAA	-0.116484	1	1	N	Not Sig	ncbiRefSeq		GAGCCGGGCAATTCAACTCTGACACTCTGCCCGGTGAGGGGCAATAAAAAGAAAAAAGTC
chr1	Emp3	-	96388650	unassigned	none	1.2259	0.733178	1	N	Not Sig	ncbiRefSeq	epithelial membrane protein 3 [Source:RGD Symbol;Acc:621094]	TTAGGAGGAGTGAGAACAGAGTCAGCCTCGTGGTATTGTGAAGAAGAGGAACCCAGTCAG
chr1	Emsy	-	152888586	CDS	none	0.0118823	1	1	N	Not Sig	ncbiRefSeq	EMSY transcriptional repressor, BRCA2 interacting [Source:RGD Symbol;Acc:1310712]	CAATCTGAGCTTCCATCAAAGACATTTGCAAAATGTCTGACACTGCTGTCTTCTCAGAGG
chr1	Emx2	+	258633593	3UTR	AATAAA	0.428649	0.576651	1	N	Not Sig	ncbiRefSeq	empty spiracles homeobox 2 [Source:RGD Symbol;Acc:1564797]	TACTTCCAAGAAGTATGTCAATGTCAATATTTTGTCAATAAAGATTTATCAATATGCCCT
chr1	Eno4	+	258119810	3UTR	AATAAA	0.354996	0.95492	1	N	Not Sig	ncbiRefSeq	enolase 4 [Source:RGD Symbol;Acc:1308333]	TATTATTTTTCCTTAGATCCCTTTTGGAATGAAAGTGGGATTAACTTAATAAAACCACTC
chr1	Enpp1	+	20763741	3UTR	AATAAA	-0.680752	0.550365	1	N	Not Sig	ncbiRefSeq	ectonucleotide pyrophosphatase/phosphodiesterase 1 [Source:RGD Symbol;Acc:628825]	CCTTTTGTCATCTGTAAAGATGTTTAGGTAATAAAACTTGCAATCAACATTGCCATGATA
chr1	Entpd1	+	239552323	3UTR	AATAAA	-0.361513	0.531758	1	N	Not Sig	ncbiRefSeq	ectonucleoside triphosphate diphosphohydrolase 1 [Source:RGD Symbol;Acc:69265]	AAGAGAGAGAAATGTTTCAATTCATCTAAATAAACGAGTAAGAAATGTAACGTGATATAA
chr1	Entpd7	+	242601042	3UTR	none	0.161176	1	1	N	Not Sig	ncbiRefSeq	ectonucleoside triphosphate diphosphohydrolase 7 [Source:RGD Symbol;Acc:1310638]	TTCAAGGCAACCAAAACGATACAGCTTCCTTGCTTACTTGACAAGCCATTGGCGGGTGTG
chr1	Epb41l2	-	19863009	unassigned	GATAAA	0.289066	0.492043	1	N	Not Sig	ncbiRefSeq	erythrocyte membrane protein band 4.1-like 2 [Source:RGD Symbol;Acc:1563977]	TGTAAAAATAGCACTCCAGTTGATTTCTTTAATGTTTATGAAAAGAGAGGTGACACATTC
chr1	Epm2a	+	5845337	3UTR	none	-0.33028	0.770776	1	N	Not Sig	ncbiRefSeq	EPM2A glucan phosphatase, laforin [Source:RGD Symbol;Acc:71047]	AGTGGATTTTTATCATTACTGTGAGTGTCACACACACATACTGCATGTGTACACACACAC
chr1	Epn1	-	68742490	unassigned	none	0.111396	0.554168	1	N	Not Sig	ncbiRefSeq	Epsin 1 [Source:RGD Symbol;Acc:619772]	CCCTGGAAGAGGGGCTTCTCAGGGACACGTGAACAGTGGACGGGAATTTGGGGGAGCCAC
chr1	Eps8l2	+	196471539	3UTR	AATAAA	0.00907654	0.929905	1	N	Not Sig	ncbiRefSeq	EPS8-like 2 [Source:RGD Symbol;Acc:1310912]	GTCCCAGAGATGAGAGTGGGGATCCTCAGCTATGTCAATAAACCAGCTGTCTCCTAGCAA
chr1	Ercc1	+	79007963	3UTR	AATAAA	-0.0390546	0.937602	1	N	Not Sig	ncbiRefSeq	ERCC excision repair 1, endonuclease non-catalytic subunit [Source:RGD Symbol;Acc:1306992]	CCCCGATGACCCCCTGCCACCGAGGCTCCGTGTCACACAATAAAGCATTTCCATGCCCAG
chr1	Eri2	-	174158849	intron	AATAGA	-0.494439	0.340105	1	N	Not Sig	ncbiRefSeq	ERI1 exoribonuclease family member 2 [Source:RGD Symbol;Acc:1583889]	CTCCACCAGGCAGATTCCCACTCAGAGAAAGCAGATAAGACATACCAAGGTATCAAACAC
chr1	Eri2	-	174161505	CDS	none	0.982258	0.898728	1	N	Not Sig	ncbiRefSeq	ERI1 exoribonuclease family member 2 [Source:RGD Symbol;Acc:1583889]	ATTTGAGCATTTTCCTGGGGATTTCCTGTACTTTGGAGCTCCTTTTGGTTTATGCTGGGA
chr1	Erlin1	-	242921146	unassigned	AACAAA	0.0657721	0.923892	1	N	Not Sig	ncbiRefSeq	ER lipid raft associated 1 [Source:RGD Symbol;Acc:1307058]	GCCGTGGAACATGCTACAGCAACAGAGAAGTGTGAAGACTTGGAGAAAACAAAACACACA
chr1	Ermard	+	56002686	3UTR	AATAAA	-0.866137	0.3869	1	N	Not Sig	ncbiRefSeq	ER membrane-associated RNA degradation [Source:RGD Symbol;Acc:1309374]	CACAGAAAGCACATGTAGAGGTTCTGAAAGATAATGAAATAAACGGAATGACTTCTTCAG
chr1	Ermp1	-	227383991	3UTR	none	1.21808	0.0719917	1	N	Not Sig	ncbiRefSeq	endoplasmic reticulum metallopeptidase 1 [Source:RGD Symbol;Acc:727831]	ATACGGCCTCTCATGCTAACCAAGTGTTCCACTACTGAGTTATATCCCACAAGCCCCTGC
chr1	Ermp1	-	227387913	3UTR	AATAAA	0.676061	0.503251	1	N	Not Sig	ncbiRefSeq	endoplasmic reticulum metallopeptidase 1 [Source:RGD Symbol;Acc:727831]	AGAGATATAAAATAGCCTGGAAATATTAGGATACAATAAAAAGCAGTTGTAAAAGATCCA
chr1	Esrra	-	204104099	3UTR	none	0.265503	0.466783	1	N	Not Sig	ncbiRefSeq	estrogen related receptor, alpha [Source:RGD Symbol;Acc:1583866]	GTTAACTAGATGTGTCGTGCGTGACCCCCCAAATTCCCCCAATGATTCACCAACCACCGT
chr1	Etfb	+	93866072	3UTR	AATAAA	0.131458	0.693894	1	N	Not Sig	ncbiRefSeq	electron transfer flavoprotein subunit beta [Source:RGD Symbol;Acc:1303312]	GAGGTGGGGAGGATCTGAGACCCTCCCTGATATGCCACAATAAAACTGTGCCTTTCCAAG
chr1	Ethe1	+	80199089	3UTR	AATAAA	0.122992	0.837484	1	N	Not Sig	ncbiRefSeq	ETHE1, persulfide dioxygenase [Source:RGD Symbol;Acc:1311034]	CTACCCCTACTCTCACCAGCTACTTCAGCTTCTTAAATAAAGTTTACTTTGATTTTGCCA
chr1	Exoc3	+	29122055	3UTR	ATTAAA	-0.0746347	0.914277	1	N	Not Sig	ncbiRefSeq	exocyst complex component 3 [Source:RGD Symbol;Acc:621790]	TTACTTTGTGGCTTTCCTATTGTCACTGTATTAAAACAAAAGTCCGTCTCTTGTGCTCCG
chr1	Exoc6	+	235457038	3UTR	AATAAA	-0.11518	0.800042	1	N	Not Sig	ncbiRefSeq	exocyst complex component 6 [Source:RGD Symbol;Acc:3653]	AAACCCAATAAATTGTGTATGAAACTGGTTGCAAATATTAGAAAAACATGTCTCTGCTTG
chr1	Exoc6	+	235457824	3UTR	ATTAAA	0.0434208	0.986594	1	N	Not Sig	ncbiRefSeq	exocyst complex component 6 [Source:RGD Symbol;Acc:3653]	TGTCTGGATTTTGTGATAATATTAAAAAGGTTGCAAGTCGGTGAAGATGCTCTTTCAGCC
chr1	Exosc1	-	240734776	unassigned	none	-0.0752597	0.78509	1	N	Not Sig	ncbiRefSeq	exosome component 1 [Source:RGD Symbol;Acc:1591855]	AGCTCACATGGTAGTGTCCAGCCTCTTCTGTCAATTCAGTCAACAGTTCAGGGATTCCTA
chr1	Exosc1	-	240735426	3UTR	CATAAA	-0.00177981	0.936416	1	N	Not Sig	ncbiRefSeq	exosome component 1 [Source:RGD Symbol;Acc:1591855]	GGTGTCATAAAACACACACACACACACACACACACACGTGTGCGCAAAGAAGAAAACTAT
chr1	Exosc1	-	240735610	3UTR	AATAAA	0.0804721	1	1	N	Not Sig	ncbiRefSeq	exosome component 1 [Source:RGD Symbol;Acc:1591855]	ATGAGCCAGAGAATAAAAATCAGTTTCCCCAAAATAGTGTTTCAAATAGTGTACATTTTC
chr1	Exosc5	+	81177266	3UTR	ATTAAA	0.275146	0.606392	1	N	Not Sig	ncbiRefSeq	exosome component 5 [Source:RGD Symbol;Acc:1307861]	TCACCAGGACACCATTAAAAAGGGCTCACCTGTGTTGAGCGAGTGAGTCGGTAGCCACTG
chr1	Eya4	+	22415977	exon	AATAAA	-1.25705	0.109526	1	N	Not Sig	ncbiRefSeq	EYA transcriptional coactivator and phosphatase 4 [Source:RGD Symbol;Acc:1307099]	TATTAAAAGCTTGTAAAAATGTACATCTTTACTATTTCTCAATAAATACCTTTGCAACTG
chr1	Ezr	-	46967960	unassigned	ATTACA	-0.0292439	0.961	1	N	Not Sig	ncbiRefSeq	ezrin [Source:RGD Symbol;Acc:621161]	CCACGGTCATCGGTCTCCCACCTGCCCCCGTGTCAGATCAAGTGTCGTGATTACATGGTT
chr1	Faap24	-	88051522	3UTR	none	0.0813732	0.964446	1	N	Not Sig	ncbiRefSeq	FA core complex associated protein 24 [Source:RGD Symbol;Acc:1564719]	TTAGGGGCTGGGGATTTAGCTCAGTGGTAGAGCGCTTACCTAGGAAGCGCAAGGCCCTGG
chr1	Fads1	+	206842733	3UTR	AATAAA	0.139256	0.737094	1	N	Not Sig	ncbiRefSeq	fatty acid desaturase 1 [Source:RGD Symbol;Acc:621678]	TGTGTCAATGTCGTTACCACATTCTGATGAAGCTAAAAAATAAAATTTAATTTGGGCCAA
chr1	Fads2	-	206707383	unassigned	none	0.268733	0.478465	1	N	Not Sig	ncbiRefSeq	fatty acid desaturase 2 [Source:RGD Symbol;Acc:68339]	CTTGTGACATTGGCATACGGGAGCACTAGTCATCCATTGATCTTGCTGAACTAAGGGCAA
chr1	Fads2	-	206708776	3UTR	AAGAAA	0.369715	0.69552	1	N	Not Sig	ncbiRefSeq	fatty acid desaturase 2 [Source:RGD Symbol;Acc:68339]	AGGATAGGGTAGGTCGGGGTGAGGGAAGAGAAGAACAAGAAAGGATGAAAAACCAAGCAC
chr1	Fads3	+	206699243	CDS	AAGAAA	-0.33805	0.895341	1	N	Not Sig	ncbiRefSeq	fatty acid desaturase 3 [Source:RGD Symbol;Acc:628876]	ACAGTATGGCAAGAAGAAACGCAGATACCTGCCCTACAACCACCAGCATCTATACTTCTT
chr1	Fah	-	138548829	unassigned	none	0.006836	0.935879	1	N	Not Sig	ncbiRefSeq	fumarylacetoacetate hydrolase [Source:RGD Symbol;Acc:61932]	AAGATGAACCATTGACTGGCTCCATAGAACAGAGACAAGGGACAAAACCAAGAACAGAGA
chr1	Fam111a	+	209656551	3UTR	AATAAA	-0.102714	0.995689	1	N	Not Sig	ncbiRefSeq	FAM111 trypsin like peptidase A [Source:RGD Symbol;Acc:1560913]	TTTTGGCCCAAATACTCATTCTCAATATTATAAAGTAATAAATGTTGTTTTTACAGCTAT
chr1	Fam120b	+	56383432	3UTR	ATTAAA	1.6027	0.0556847	1	N	Not Sig	ncbiRefSeq	family with sequence similarity 120B [Source:RGD Symbol;Acc:1310304]	TAGCAGGAGTCTAATTCCAAACATTTGCTGACTATTAAATTGTGAAAATGTTTCCTCAAA
chr1	Fam120b	+	56385062	3UTR	AATAAA	0.126002	0.839953	1	N	Not Sig	ncbiRefSeq	family with sequence similarity 120B [Source:RGD Symbol;Acc:1310304]	TCAAGTCTTGTGATAGAATTTCCACATATCAATTTAAAATAAAAATACATTTTTAAACTC
chr1	Fam160a2	-	159718678	unassigned	AACAAA	-0.182431	0.806538	1	N	Not Sig	ncbiRefSeq		TTATGAGATTTCCCTTTGATTGATCTAGTCTGAGAAAATAACTGAGATATGAACAAACAC
chr1	Fam160a2	-	159728470	CDS	AATAAA	0.0704813	0.951168	1	N	Not Sig	ncbiRefSeq		TAACTAATGCTGGCTACTGAGATATCTAGGGAGAATAAAGGAAGGTGGTCCTCACCTAGG
chr1	Fam160b1	+	256444107	3UTR	AATAAA	-0.537743	0.427431	1	N	Not Sig	ncbiRefSeq		CTTACAGTGCATGCAGGACAAAGAGGGAAATCAAGAAAATAAATTGATGTGACTTAAACG
chr1	Fam168a	+	155203175	3UTR	AATAAA	-0.677858	0.379354	1	N	Not Sig	ncbiRefSeq	family with sequence similarity 168, member A [Source:RGD Symbol;Acc:1308929]	AAACAAATAAAAACATTTAAAAATAATAATAATTATAATAATAAACCTTTGACCAGTGTC
chr1	Fam168a	+	155203436	3UTR	ATTAAA	0.119998	0.719971	1	N	Not Sig	ncbiRefSeq	family with sequence similarity 168, member A [Source:RGD Symbol;Acc:1308929]	TTACTGTAAGCTGTAGAACATTCAACAACTATTAAAAGAAAGTTTCCAAAAAAAAAAAAA
chr1	Fam169b	+	121949317	CDS	none	2.55576	0.344521	1	N	Not Sig	ncbiRefSeq	family with sequence similarity 169, member B [Source:RGD Symbol;Acc:1585883]	CCGTTGCCAAGGCCTGGGGACAGCAATGCTGAGGGACTTCTGTGACACCTTTCACGGAGA
chr1	Fam169b	+	121957313	CDS	none	-0.155946	0.939908	1	N	Not Sig	ncbiRefSeq	family with sequence similarity 169, member B [Source:RGD Symbol;Acc:1585883]	TTTGCTTTATGTTCTGATTTCAGGAACGGATCATTGGAGAACCAGAGAGGACACAGAATG
chr1	Fam169b	+	121958473	intron	ATTAAA	-0.0407296	0.955439	1	N	Not Sig	ncbiRefSeq	family with sequence similarity 169, member B [Source:RGD Symbol;Acc:1585883]	ATGATAATGGACTGAACCTCTGAACCTGTAAGCCAGACCCAATTAAATGTTTTTATAAGA
chr1	Fam174b	+	127568601	3UTR	none	-0.393742	0.660012	1	N	Not Sig	ncbiRefSeq	family with sequence similarity 174, member B [Source:RGD Symbol;Acc:1596692]	CAAAAGCCTGAAGGGGACTTTCAGATGTACCCAGGAGAATCATGACATTTTGTTCTCCCA
chr1	Fam174b	+	127618591	3UTR	none	0.825684	0.707617	1	N	Not Sig	ncbiRefSeq	family with sequence similarity 174, member B [Source:RGD Symbol;Acc:1596692]	AGCATCAGGAAGGAACCAGAGTAGGTTGTTGAGCCATGAAAAAGTCACTTCAGCATAGCA
chr1	Fam181b	+	147167923	3UTR	AATAAA	-0.187622	0.958795	1	N	Not Sig	ncbiRefSeq	family with sequence similarity 181, member B [Source:RGD Symbol;Acc:1564695]	ATCACGCATGTGAAGATGAAATGGGATTAAAAAAAATAAAACCGCGATCCATTTAATAAA
chr1	Fam189a1	-	118288364	unassigned	none	-0.119825	0.926149	1	N	Not Sig	ncbiRefSeq		TGGCAGCTTCTTGCTCCCCCAAACCCAGTCCTTCCAGGACCCTTTTAGTCCCAGTGAGAA
chr1	Fam189a2	-	221592499	unassigned	none	-0.415766	0.602616	1	N	Not Sig	ncbiRefSeq		CCCCAAACTCACTTCCATGAGTTATCTGTACGCACACAAACACTACACATGGAGCCCAGA
chr1	Fam53b	-	187500060	unassigned	AACAAA	0.102631	0.786853	1	N	Not Sig	ncbiRefSeq	family with sequence similarity 53, member B [Source:RGD Symbol;Acc:1310799]	GCCAGGAGAGGCTGCTGGTTCACTGCACCCAACAAAAAGCACAGAGCTATGCCCAGGCAG
chr1	Fam71e1	+	94993535	intron	AATAAA	-0.139614	0.959982	1	N	Not Sig	ncbiRefSeq		GCTCAGAGCCAGAGAGATGGATTTTTAAACTTAATAAAGATCAGGCTCTTAAGAACTAAT
chr1	Fam71e1	+	94995971	CDS	none	1.2259	0.609785	1	N	Not Sig	ncbiRefSeq		TGAAGGTCGGCGAATGTTCAGGGTCAGGATGCCCTGGTAGTTGGTTATGAGGAATTTGGG
chr1	Fam83e	+	96200375	CDS	none	0.358272	0.622771	1	N	Not Sig	ncbiRefSeq	family with sequence similarity 83, member E [Source:RGD Symbol;Acc:1309316]	AGACCTGGTCAAAAGTCTCACTCTGCGCCACAGTGAAGTGGTTCTTCCAGTCGCCACTGA
chr1	Fam89b	-	203015771	unassigned	none	-0.0331264	0.946094	1	N	Not Sig	ncbiRefSeq	family with sequence similarity 89, member B [Source:RGD Symbol;Acc:1311544]	GACTACCCTTGCCAGAAAACTATCCCCAACCCAGTCAGTACCAATTAACCAAGCAATCAC
chr1	Fam98c	-	84452805	3UTR	AACAAG	-0.301609	0.912724	1	N	Not Sig	ncbiRefSeq	family with sequence similarity 98, member C [Source:RGD Symbol;Acc:1303117]	CGCTGCCCCTCCACAAACCCATATACCCCCTGACCTGGTTTCCAACAGAAACAAGAACCT
chr1	Fan1	-	117915322	unassigned	none	-1.70738	0.0138687	0.574642	N	Not Sig	ncbiRefSeq	FANCD2 and FANCI associated nuclease 1 [Source:RGD Symbol;Acc:1566323]	TATCCAGCAGATATCTTGGGGCACCGCGGTGCGGACGCAGCGAGGAAAAAGACAACTTTA
chr1	Fan1	-	117916751	3UTR	none	1.42293	0.138626	1	N	Not Sig	ncbiRefSeq	FANCD2 and FANCI associated nuclease 1 [Source:RGD Symbol;Acc:1566323]	TAAAGTTCTTTCTGCAGACACTGGATCCAGGTGGCTTCCGACTCTTCCTCATCTGCCTGT
chr1	Fanci	+	133383658	intron	AATAAA	0.150741	0.827141	1	N	Not Sig	ncbiRefSeq	FA complementation group I [Source:RGD Symbol;Acc:2321863]	CACATAAGGATGCACTTTGGCTTATACAATAAATCTTTAAACATTTCTGGGGTAGTTTTG
chr1	Fank1	+	188685500	3UTR	AATAAA	-1.47267	0.282609	1	N	Not Sig	ncbiRefSeq	fibronectin type III and ankyrin repeat domains 1 [Source:RGD Symbol;Acc:1304756]	TTTTGTGTCTCTAGGGACAAACTGGTTCATTTAGCCTTCTAATAAAGCAGCTAGAAAAAC
chr1	Far1	+	167703097	3UTR	none	-0.225184	0.824054	1	N	Not Sig	ncbiRefSeq	fatty acyl CoA reductase 1 [Source:RGD Symbol;Acc:1306647]	TTTTTTTTTGAAATCCTTTAAGAGGTGGGGTTTAGTTTTGCTAAAGACCACAGCCATGTA
chr1	Far1	+	167705251	3UTR	AATAAA	-0.784607	0.111124	1	N	Not Sig	ncbiRefSeq	fatty acyl CoA reductase 1 [Source:RGD Symbol;Acc:1306647]	ATTGGGTGCCTTTGTTTGTAAACCAAAAAGTAATAAATGAATCCCTATATTTCTATTATA
chr1	Far1	+	167705868	3UTR	AATAAA	0.55951	0.259277	1	N	Not Sig	ncbiRefSeq	fatty acyl CoA reductase 1 [Source:RGD Symbol;Acc:1306647]	AAATGAGTTCATCAGTCTGTTTATATATGAAATATTTTCTTAATAAAGAAAATTTGAGCA
chr1	Fastkd3	-	34858341	unassigned	ATTAAA	-0.276802	0.701677	1	N	Not Sig	ncbiRefSeq	FAST kinase domains 3 [Source:RGD Symbol;Acc:1309729]	TAAACTTCCTTCTAATCCTCACTAGAAACAGAAAACCACATTAAAAACAAGACAACTAAC
chr1	Fau	+	203351741	3UTR	AATAAA	0.189698	0.532829	1	N	Not Sig	ncbiRefSeq	FAU ubiquitin like and ribosomal protein S30 fusion [Source:RGD Symbol;Acc:61938]	AATGCTAATTCCTAAGTCCTGTTGTGATCCTGCCACACTAATAAAGCCACTTTGCCCAGA
chr1	Fbl	+	83478929	3UTR	ATTAAA	0.880495	0.163476	1	N	Not Sig	ncbiRefSeq	fibrillarin [Source:RGD Symbol;Acc:1305542]	TACTGTTGCACATGTGGCTTTTGACTTTTTGCAGGGGATTTTTCTATTAAAAGACTAATC
chr1	Fbrs	+	182104025	3UTR	TATAAA	-0.263214	0.849835	1	N	Not Sig	ncbiRefSeq	fibrosin [Source:RGD Symbol;Acc:1594591]	ATTCTGTAACATGACTTGCGAATATTTATATAAAAATGAGTGTTACAATGAGACACCCCC
chr1	Fbxl15	+	245191972	3UTR	AATAAA	0.742794	0.199418	1	N	Not Sig	ncbiRefSeq	F-box and leucine-rich repeat protein 15 [Source:RGD Symbol;Acc:1306444]	GAGAGGCCTGGGATAGCCCTGTCCCACCCTGGAATTTCAAATAAAGAGCTTTTTACCCCT
chr1	Fbxl19	+	182380294	3UTR	none	0.801188	0.741738	1	N	Not Sig	ncbiRefSeq	F-box and leucine-rich repeat protein 19 [Source:RGD Symbol;Acc:1310989]	TCCGACCTGAGTTGGGGGTGGGGGAATGTCAGCTTAAAGATGGGCAAGATGGGACTCCTC
chr1	Fbxl19	+	182380837	3UTR	TATAAA	0.0060057	0.970078	1	N	Not Sig	ncbiRefSeq	F-box and leucine-rich repeat protein 19 [Source:RGD Symbol;Acc:1310989]	TGGACCCCTAACCCCACAAGTCTGTACAATAAGGTTTGCTATAAAACTCAGAATCTAGCC
chr1	Fbxo17	+	84024455	3UTR	AATACA	-0.344061	0.82787	1	N	Not Sig	ncbiRefSeq	F-box protein 17 [Source:RGD Symbol;Acc:1308308]	AACCAAGCTTGGAATTATAACAAAAGGCTACTTAAAAGAATACAGTGACAAAATTTTTTA
chr1	Fbxo27	+	83987780	3UTR	AATAAA	-0.63979	0.384265	1	N	Not Sig	ncbiRefSeq	F-box protein 27 [Source:RGD Symbol;Acc:1563982]	ATAACACACTGGCAATATCTACCTGCCAATTGCACTGTAATAAATTGATTATTTTGCCTA
chr1	Fbxo30	+	5671558	3UTR	TATAAA	-0.0240231	1	1	N	Not Sig	ncbiRefSeq	F-box protein 30 [Source:RGD Symbol;Acc:1359367]	CTTTTGATGTTTATAAAACACTTCAAGACATTTAAGACATTTAAAAATGTGAAACTTCAA
chr1	Fbxo46	+	78786579	3UTR	TATAAA	0.025031	0.811307	1	N	Not Sig	ncbiRefSeq	F-box protein 46 [Source:RGD Symbol;Acc:1308393]	CTAGTGTGTGGCATCTGACCAATTTTTAATTGGTTCTTTCTATAAAATCAATATTTATAA
chr1	Fbxw4	-	244426891	3UTR	AATAAA	0.337425	0.541622	1	N	Not Sig	ncbiRefSeq	F-box and WD repeat domain containing 4 [Source:RGD Symbol;Acc:1306518]	AGCTGCAGTGTACGCATATACATTAAATAAATCTTAAAAAAAAAATGACCTAACCATCAA
chr1	Fcgbp	+	83413082	3UTR	AGTAAA	-0.692207	0.707263	1	N	Not Sig	ncbiRefSeq	Fc gamma binding protein [Source:RGD Symbol;Acc:2313189]	TCCCCCTTGCTGAGCCCCTGAATTCAAACCTGAAAGCATCGAGTAAATATCTTGACCCAG
chr1	Fcgrt	-	95574435	unassigned	TATAAA	0.348967	0.540657	1	N	Not Sig	ncbiRefSeq	Fc gamma receptor and transporter [Source:RGD Symbol;Acc:61811]	ACACAACTCGGTCTATAAAATGGCCAGGCTGTACCACAGCAATCAGGAGGAGTCTGTAAG
chr1	Fchsd2	+	155685348	3UTR	AATAAA	-0.0448841	0.886525	1	N	Not Sig	ncbiRefSeq	FCH and double SH3 domains 2 [Source:RGD Symbol;Acc:1304812]	CTGTAAAAAGTTTGTATTTATTATGTATAAAATGTTGAATAATAAAAAGTGAAATTAAGT
chr1	Fen1	-	206845125	unassigned	ACTAAA	-0.135799	0.791559	1	N	Not Sig	ncbiRefSeq	flap structure-specific endonuclease 1 [Source:RGD Symbol;Acc:621821]	TCTATTTATTCTACAGGAAACTAAAACACTCAGGGCATTCTCAAACATTCAGAAAGCCAC
chr1	Fermt3	-	204189482	CDS	GATAAA	-0.0307211	0.928858	1	N	Not Sig	ncbiRefSeq	FERM domain containing kindlin 3 [Source:RGD Symbol;Acc:1310168]	GATAAAGAGACAGAGTCTCAGAGTGGCCCCAAGCACAGCTCCAGAGGAGGAAGAAGAAAG
chr1	Fes	-	134337697	unassigned	none	0.0887186	1	1	N	Not Sig	ncbiRefSeq	FES proto-oncogene, tyrosine kinase [Source:RGD Symbol;Acc:1564385]	ACTACAGTCATCCTCTCCTAAGAACTGGCCCCTGGCCTCCAGAGGAGCACACATGTCAAT
chr1	Fgfbp3	-	234644022	unassigned	AATAAA	-0.120322	0.930312	1	N	Not Sig	ncbiRefSeq	fibroblast growth factor binding protein 3 [Source:RGD Symbol;Acc:1560326]	ACACACACGCACACACACACACACAAATAAAAGAATGAAATAAAAGAAATCGCAGAATTT
chr1	Fgfr2	-	184745417	unassigned	none	-0.113152	0.927105	1	N	Not Sig	ncbiRefSeq	fibroblast growth factor receptor 2 [Source:RGD Symbol;Acc:2611]	ACCCCACCAAGTACTGTCCACAGCTCCAAAGCACAGGAAACCATTTGGTAAGACACGAGT
chr1	Fgfr2	-	184746950	CDS	none	0.00681268	1	1	N	Not Sig	ncbiRefSeq	fibroblast growth factor receptor 2 [Source:RGD Symbol;Acc:2611]	TTCCTGGTGCTGTCCTGTTTGGGGACAGGAAGACACACCCGCTCATGTTTTAACACTGCC
chr1	Fibp	+	202772404	exon	AATAAA	-0.128492	0.777148	1	N	Not Sig	ncbiRefSeq	FGF1 intracellular binding protein [Source:RGD Symbol;Acc:628715]	GCCCCTTTCCTTCCTCCCTCCGACATACCCCGAGAATAAAGTTGCCATAAGTTTGCAGAC
chr1	Fiz1	+	68835723	3UTR	AATAAA	-0.223931	0.744377	1	N	Not Sig	ncbiRefSeq	FLT3-interacting zinc finger 1 [Source:RGD Symbol;Acc:1306359]	ACCTGACCCCTGACCCCTCTCCCCAATGTCTCTGGGACTCCAATAAACCTCATTCAATCA
chr1	Fkbp2	-	204167723	unassigned	AAGAAA	0.0288754	0.928069	1	N	Not Sig	ncbiRefSeq	FKBP prolyl isomerase 2 [Source:RGD Symbol;Acc:1560660]	GCCCTACTCCCAACACTGAAGCTAAATCTCTTAGGATCCACAAAGAAACACAGACTCACT
chr1	Fkrp	-	77479640	unassigned	AACAAG	-0.0433203	0.978991	1	N	Not Sig	ncbiRefSeq	fukutin related protein [Source:RGD Symbol;Acc:1305852]	AACAGGGTGCACGCAGGGGTGGATGGGAGTAGGGCACATCCAGGAAGTGTGTGGAACAAG
chr1	Flrt1	-	204275784	intron	none	-0.138156	0.970416	1	N	Not Sig	ncbiRefSeq	fibronectin leucine rich transmembrane protein 1 [Source:RGD Symbol;Acc:1565152]	CACGGAGACAGCTCCTGATGAGCTGGGCTGCTGAGCCCACAGTCGGCAGCAGAGAGGACT
chr1	Flt3lg	-	95615055	unassigned	none	0.604111	0.484298	1	N	Not Sig	ncbiRefSeq		TGAAGTTTTGATCTCTCTGCCTCAGCCTCCTGAATACTGAGATTCCAGGCACGCAGCACC
chr1	Flt3lg	-	95615966	intron	none	1.61632	0.751388	1	N	Not Sig	ncbiRefSeq		CTGACTCTCATCCCGAAGCCTGGCCATTCCAGGCTGCAGTGTAAGCAGTAGGGTAGACTC
chr1	Folh1	-	140428100	unassigned	none	-0.283143	0.704172	1	N	Not Sig	ncbiRefSeq	folate hydrolase 1 [Source:RGD Symbol;Acc:70963]	TTTACTCATGAAAATGTGGTGACACACAAAATCTTGTACCTACAAGATTAACTCAAATGC
chr1	Fosb	-	78954311	unassigned	AATGAA	5.97906	6.01215e-51	2.80873e-47	Y	FDR<0.05	ncbiRefSeq	FosB proto-oncogene, AP-1 transcription factor subunit [Source:RGD Symbol;Acc:1308198]	GTCAATGAACTGTGGTCGGCAGCGGCAGGAGGCCCTTCATCTGATCAGACATATCCACCC
chr1	Fosl1	+	202763057	3UTR	AATAAA	3.36502	0.00027772	0.030173	Y	FDR<0.05	ncbiRefSeq	FOS like 1, AP-1 transcription factor subunit [Source:RGD Symbol;Acc:2627]	TTTCCTAAAGAGACTATTTTTATACAAACCTTCCAAAATGGAATAAAAGGCTTGAAGCTC
chr1	Fra10ac1	-	235969070	unassigned	none	-0.117086	0.841215	1	N	Not Sig	ncbiRefSeq	FRA10A associated CGG repeat 1 [Source:RGD Symbol;Acc:1309482]	TCCAAAGCAGGGCTCAACATAGCAGTTCATACACAGCAGAAGCCTGGTAAACACTCACAT
chr1	Frat1	+	240640857	3UTR	AATAAA	-0.13043	0.976748	1	N	Not Sig	ncbiRefSeq	FRAT regulator of WNT signaling pathway 1 [Source:RGD Symbol;Acc:9147096]	AGGATTTTAACTTAACTGAAATAACTGTTTTTGAATAAATGTGTTGGGTTCCCCACCACC
chr1	Frat2	-	240654119	unassigned	AACAAA	-0.317386	0.767855	1	N	Not Sig	ncbiRefSeq	FRAT regulator of WNT signaling pathway 2 [Source:RGD Symbol;Acc:1591882]	TACTACTGACACCCCACATGGTCTTCATTCCCCTCAAACCTGCAATCAGAAACAAAGACC
chr1	Frmd8	-	203143215	unassigned	ATTATA	-0.416785	0.615977	1	N	Not Sig	ncbiRefSeq	FERM domain containing 8 [Source:RGD Symbol;Acc:1310323]	GGCACACAGGACACGTGTGGTTACCATACCCTGGCCATTCCATATTATAACCATTCCAAA
chr1	Fsd2	-	135484001	unassigned	AAGAAA	0.705533	0.463048	1	N	Not Sig	ncbiRefSeq	fibronectin type III and SPRY domain containing 2 [Source:RGD Symbol;Acc:1305167]	GAAAGCACAAGAAACCACATTCTGTTAGCGTCTGAGAAAAGGAAGGAACGTCAGTCCAAC
chr1	Fsd2	-	135486047	3UTR	AATAAG	-0.00933499	1	1	N	Not Sig	ncbiRefSeq	fibronectin type III and SPRY domain containing 2 [Source:RGD Symbol;Acc:1305167]	AAATACTCACACATTTAAAAAAATAAGTTTTTAAATGTTTTCCTATTTTGTTTTCTAACA
chr1	Fth1	+	206629429	3UTR	AATAAA	0.886926	6.22521e-05	0.00855371	N	FDR<0.05	ncbiRefSeq	ferritin heavy chain 1 [Source:RGD Symbol;Acc:2635]	AAACATCTGCTTAAAAGTTCTTTAATTTGTACCATTTCTTCAAATAAAGAATTTTGGTAC
chr1	Ftl1	-	95936389	unassigned	none	1.05987	0.0103095	0.472737	N	Not Sig	ncbiRefSeq	ferritin light chain 1 [Source:RGD Symbol;Acc:61813]	AACACAGCAGAGCCAACTCCTTTCCATGCAGCCCTCCCACACAGACAGAAAAACCAGCTG
chr1	Fuca2	+	7900777	3UTR	TATAAA	-0.148111	0.806602	1	N	Not Sig	ncbiRefSeq	alpha-L-fucosidase 2 [Source:RGD Symbol;Acc:1303053]	TGTTGTTGTTACACTAAAGAGACTAAATGATATAAAAATGATATAAAAACTGAAGCCATT
chr1	Furin	-	134348141	exon	none	-0.00520565	0.913927	1	N	Not Sig	ncbiRefSeq	furin (paired basic amino acid cleaving enzyme) [Source:RGD Symbol;Acc:3274]	CCCCAGTTGAACACAGTGAAGGGTCCTGAGAAAAGGAAGAGCAACACACTGGAGACCAGG
chr1	Fus	+	182590414	3UTR	ATTAAA	0.235373	0.559065	1	N	Not Sig	ncbiRefSeq	Fus RNA binding protein [Source:RGD Symbol;Acc:1308864]	GTGTGTCAGACTACCGTAATTGTAACCATATCTCTGGTTCCCATTAAAAACCATTTTAGT
chr1	Fut2	-	96119548	unassigned	AACAAA	-0.331136	0.585428	1	N	Not Sig	ncbiRefSeq	fucosyltransferase 2 [Source:RGD Symbol;Acc:2639]	AGCCAGGGCTTTGTAGAGATACTGTTTCAAAAGACCAAACAAACAAACAAACACCATGAA
chr1	Fuz	+	95383231	CDS	none	-0.543336	0.997163	1	N	Not Sig	ncbiRefSeq	fuzzy planar cell polarity protein [Source:RGD Symbol;Acc:1310608]	GCAACGCAGGCGCCTCCTTAGAAATTTCTATACGTTGGTGGCCACCACCCACTTCCCACC
chr1	Fuz	+	95384192	CDS	none	0.626088	0.505603	1	N	Not Sig	ncbiRefSeq	fuzzy planar cell polarity protein [Source:RGD Symbol;Acc:1310608]	GGCCAGGCATGGGGTGGCAGCTGGTGGCTGTGCAGCTAGGGCTACGGCTGCTGCTGTTGA
chr1	Fuz	+	95384422	3UTR	none	-0.496244	0.824897	1	N	Not Sig	ncbiRefSeq	fuzzy planar cell polarity protein [Source:RGD Symbol;Acc:1310608]	AGGGAGGGAGGGAGGAGGGTGAAAAGGAGGGAGGGGGAGGGGAGGAGGTACCTACTTCCC
chr1	Fuz	+	95384530	3UTR	AATAAA	0.550781	0.236853	1	N	Not Sig	ncbiRefSeq	fuzzy planar cell polarity protein [Source:RGD Symbol;Acc:1310608]	TCCCTTGACCCCCCAGAATGTAAACAGCAGCAGATGAACAAAAATAAAATACAAAGGCCA
chr1	Fv1	+	94736791	exon	ATTAAA	-0.0579701	0.750499	1	N	Not Sig	ncbiRefSeq	Friend virus susceptibility 1 [Source:RGD Symbol;Acc:1309326]	TGAGGTGGGCAGCCCTGGAACTTTTGCCTTCGTGAGTTCCTATTAAATGGCTGGATCATT
chr1	Fxn	-	221874006	unassigned	AAGAAA	-0.0558783	1	1	N	Not Sig	ncbiRefSeq	frataxin [Source:RGD Symbol;Acc:1565754]	AAGAAACGATGCAATTCTAACAAAGATGCAATTCTAACAAATCGTCAGATCCGGGACAGG
chr1	Fxn	-	221874110	3UTR	none	-0.0750161	1	1	N	Not Sig	ncbiRefSeq	frataxin [Source:RGD Symbol;Acc:1565754]	GTGATTATCTTCGGAAGCAGGTATGGGAAACCAGACATTCAGCTATAGAAGGAGGCTGGG
chr1	Fxyd1	-	86287162	unassigned	none	-0.00579633	0.936427	1	N	Not Sig	ncbiRefSeq	FXYD domain-containing ion transport regulator 1 [Source:RGD Symbol;Acc:69306]	GGGGCCACGGGGGGGGGCCTCCCGAGTTTTCGCAGGAGAGGCACTGAGATCAACTAAGCG
chr1	Fxyd3	-	86305530	3UTR	none	0.00531158	0.964456	1	N	Not Sig	ncbiRefSeq		CCTCCTCGCTGCCGGCAGCCACACTCCAAGCTCCACACAGAGTCTCTGGCTCGCCTGAGC
chr1	Fxyd5	-	86267936	unassigned	none	-0.0286827	0.956306	1	N	Not Sig	ncbiRefSeq	FXYD domain-containing ion transport regulator 5 [Source:RGD Symbol;Acc:620827]	CAGCCCTGCCTCTTCCTCCCATTCCTGTGCCACGAATTCACAGAAGACAGAGGCCACGGA
chr1	Fxyd7	-	86277677	unassigned	none	0.160729	0.672946	1	N	Not Sig	ncbiRefSeq	FXYD domain-containing ion transport regulator 7 [Source:RGD Symbol;Acc:620830]	CAGCCGCCTCAGCCTCCCACCCAGTCCTCTGGTGCCCACAGACGACAACACACAGACAGA
chr1	Gabra5	-	108268727	unassigned	TATAAA	-0.0195253	0.964325	1	N	Not Sig	ncbiRefSeq	gamma-aminobutyric acid type A receptor subunit alpha 5 [Source:RGD Symbol;Acc:61859]	TTTAGTGACTTAGTTAATCAAAACTTGAATCTAAATTATAAATTACATGACATGAGATCA
chr1	Gabrb3	+	108702521	3UTR	ATTAAA	0.237978	0.412756	1	N	Not Sig	ncbiRefSeq	gamma-aminobutyric acid type A receptor subunit beta 3 [Source:RGD Symbol;Acc:2651]	CAGATACAATATGAAACTTGTTGAATGAATTCAAATTTATTAAAAAAGGACTAACTGATA
chr1	Gal	-	200650438	unassigned	AATAAA	0.128852	0.831043	1	N	Not Sig	ncbiRefSeq	galanin and GMAP prepropeptide [Source:RGD Symbol;Acc:61954]	AATAAACTACACAGGAGGTGGCAGTGATAGACGCAGCATAGAAGAACCAAACAGTCCAGT
chr1	Gal3st3	+	202603446	3UTR	AATAAA	-0.310235	0.558894	1	N	Not Sig	ncbiRefSeq	galactose-3-O-sulfotransferase 3 [Source:RGD Symbol;Acc:1564991]	TCTTCTTCTTCTTCTTCTTTTCTTCTTATTCCTTTTTTAAAAATAAAACAACTCTAAATT
chr1	Galnt18	-	165593179	unassigned	AGTAAA	0.0617666	0.850504	1	N	Not Sig	ncbiRefSeq	polypeptide N-acetylgalactosaminyltransferase 18 [Source:RGD Symbol;Acc:1309623]	GACGCCAACTCCAGGGGAGCCGGGCCCAGCTCACTCCAGGGAACCAAATGACTGTGAAGA
chr1	Ganab	+	205813699	intron	AATAAA	-0.0544258	0.883503	1	N	Not Sig	ncbiRefSeq	glucosidase II alpha subunit [Source:RGD Symbol;Acc:1309775]	TCCCAACTGTGACAGGTTTTGATAAAAAGGAGAAACAATAAAAAATAATAATACCATAGA
chr1	Gapdhs	-	85979095	unassigned	none	0.0433352	0.991166	1	N	Not Sig	ncbiRefSeq	glyceraldehyde-3-phosphate dehydrogenase, spermatogenic [Source:RGD Symbol;Acc:620150]	AGCGCCGCCTTGAAGCGGGCCCTGAACGCAAGGTGATCGGCGCAGAGACAAGGGGGCAAA
chr1	Garre1	-	86862120	unassigned	none	-0.782248	0.255544	1	N	Not Sig	ncbiRefSeq	granule associated Rac and RHOG effector 1 [Source:RGD Symbol;Acc:1308428]	TCTTCTGAGAGCCACTGCTTCTAACACATCTGCAGCAGTTAATTTTAAAAAAGATGCAGA
chr1	Gas2	+	101532458	CDS	none	-0.171378	0.919345	1	N	Not Sig	ncbiRefSeq	growth arrest-specific 2 [Source:RGD Symbol;Acc:1563167]	CTCCTTCGCCTTCTCCTTCATCAAAGTCTTCAGGGAAGAAGAGTACTGGAAACCTACTGG
chr1	Gas2	+	101582619	3UTR	AATAAA	-0.745783	0.194801	1	N	Not Sig	ncbiRefSeq	growth arrest-specific 2 [Source:RGD Symbol;Acc:1563167]	CACACATTATCTGTCTCTGTATCAGCGCTTCACTCCTAAATAAAGTTAATCTTCAAAACT
chr1	Gatd1	-	196504532	unassigned	none	-0.94202	0.228282	1	N	Not Sig	ncbiRefSeq	glutamine amidotransferase class 1 domain containing 1 [Source:RGD Symbol;Acc:1304836]	AACCAGACTGCCTGCATCTCAGGAGAGCCTGGTCTATTTAGTGACTTCCAGGACTATATT
chr1	Gatd1	-	196504773	3UTR	AATAAA	-0.444816	0.239203	1	N	Not Sig	ncbiRefSeq	glutamine amidotransferase class 1 domain containing 1 [Source:RGD Symbol;Acc:1304836]	AATGCACATAAAAATAGAGAAATCATTAAAAATAAAATAAGCATTTAAAAATAAGCAAGA
chr1	Gatd1	-	196506627	3UTR	AATAAG	0.000124995	0.8125	1	N	Not Sig	ncbiRefSeq	glutamine amidotransferase class 1 domain containing 1 [Source:RGD Symbol;Acc:1304836]	GCCGCTATAGGGATAGGATAATAAGAACTGTTCACTCTAAAAAGATGAGTTCATAGCCAG
chr1	Gbf1	+	245147050	3UTR	AATAAA	-0.0371129	0.932966	1	N	Not Sig	ncbiRefSeq	golgi brefeldin A resistant guanine nucleotide exchange factor 1 [Source:RGD Symbol;Acc:1307160]	ATGGAAAAATAACATTGGACTTTTTATGATATAATAAATGTCTTAGTACCAACACAGTTC
chr1	Gcnt1	-	214718343	unassigned	AAGAAA	1.02637	0.177969	1	N	Not Sig	ncbiRefSeq	glucosaminyl (N-acetyl) transferase 1 [Source:RGD Symbol;Acc:621370]	ATATAGAAACCCTTATTGTGATTGGCGGAGCTAAGAAGAAATAATGTGTGCAGACACAGT
chr1	Gda	-	218903044	intron	ATTAAA	0.0859084	0.772936	1	N	Not Sig	ncbiRefSeq	guanine deaminase [Source:RGD Symbol;Acc:621617]	TTCATCCATTAAACTGATCTGACTTTCAACCAAAGCAAAGAACAAATACAACACACACCG
chr1	Gde1	-	173016983	unassigned	none	0.0575054	0.570245	1	N	Not Sig	ncbiRefSeq	glycerophosphodiester phosphodiesterase 1 [Source:RGD Symbol;Acc:621788]	CAGAGTCACCCCAGAGTCCCAGACGCTGTAGGACCAGAAGTGTGGTACAGTTTGCCCTCT
chr1	Gdpd5	+	153760551	3UTR	ATTAAA	1.07463	0.163494	1	N	Not Sig	ncbiRefSeq	glycerophosphodiester phosphodiesterase domain containing 5 [Source:RGD Symbol;Acc:1559673]	GCCAAAGTTGCCTATAGTAGAAGGAACCTAAGGGCAAAAACAATTAAATCTGCCATCGTG
chr1	Gdpgp1	+	134192218	intron	AGTAAA	-0.198588	0.673879	1	N	Not Sig	ncbiRefSeq	GDP-D-glucose phosphorylase 1 [Source:RGD Symbol;Acc:1560277]	CACACACACACACAAATGTATCTCAAAACAAGATTTTTTTAAAAAGTAAATGTAAAAAGG
chr1	Gdpgp1	+	134193281	intron	AATAAA	-0.460709	0.368236	1	N	Not Sig	ncbiRefSeq	GDP-D-glucose phosphorylase 1 [Source:RGD Symbol;Acc:1560277]	TCCAGCTCAACTTCTCAAAAAAATAAAGAAAAATCGATCCTTTTTTTCTAGCTCCCAGTA
chr1	Gemin7	-	79215053	unassigned	none	-0.304502	0.380198	1	N	Not Sig	ncbiRefSeq	gem (nuclear organelle) associated protein 7 [Source:RGD Symbol;Acc:1597035]	AGGACAGATGGAAAACAGCTTGAGAGGCTCAACCCTGCAAGCTCCTCAGTGCTCTCTGCA
chr1	Gemin7	-	79215208	3UTR	none	-0.290947	0.651709	1	N	Not Sig	ncbiRefSeq	gem (nuclear organelle) associated protein 7 [Source:RGD Symbol;Acc:1597035]	TTTCAACACGAAAGACCTAGGATGTCTGTGGTTGCAGCCTCCCACTGTGGCACAGCCTGT
chr1	Gfra1	-	257315681	unassigned	AATATA	-0.498385	0.359063	1	N	Not Sig	ncbiRefSeq	GDNF family receptor alpha 1 [Source:RGD Symbol;Acc:2681]	TGCTTCTTTCAGGAATTTTGTCACCAAAACAAGTACAGTAAGTAATATAAGCCATTTTTA
chr1	Gfra1	-	257320221	3UTR	ATTAAA	0.4046	0.894086	1	N	Not Sig	ncbiRefSeq	GDNF family receptor alpha 1 [Source:RGD Symbol;Acc:2681]	CTTAATTAAAGCAAAAGTAGGCTCACTAGGAGATATGCTCCCATTCATGACTGGCATTCT
chr1	Gga2	-	176552045	unassigned	none	-0.0773029	1	1	N	Not Sig	ncbiRefSeq	golgi associated, gamma adaptin ear containing, ARF binding protein 2 [Source:RGD Symbol;Acc:1304800]	ACCTCTCCCTTCCAGGCTGTTACCTTTAAATGCATCCCCTATGGACTCAACACCAGGCAG
chr1	Ginm1	-	2246383	unassigned	AATAAA	0.158019	0.513806	1	N	Not Sig	ncbiRefSeq	glycosylated integral membrane protein 1 [Source:RGD Symbol;Acc:1309759]	ACAGGCATTTTTATCACCTGCGCAAACTCTCTCCCCCATGCATAAACTAAAAATAAAGCA
chr1	Gipr	-	78804286	unassigned	AAGAAA	-1.06863	0.287838	1	N	Not Sig	ncbiRefSeq	gastric inhibitory polypeptide receptor [Source:RGD Symbol;Acc:2689]	TACAGTGCCACCCCTTGCCCAAGACTGACATTTCTGTTGCCTTCCAAAGAAGCAGGACGT
chr1	Gldc	-	227883246	unassigned	ACTAAA	-0.187271	0.960933	1	N	Not Sig	ncbiRefSeq	glycine decarboxylase [Source:RGD Symbol;Acc:1308660]	TGTCACTGCCCTGCAGCTTCCTGAGTCTTGTGCATCATGGGTGTAAAATCACATGGGAAG
chr1	Gldc	-	227894185	intron	AACAAA	0.701762	0.765671	1	N	Not Sig	ncbiRefSeq	glycine decarboxylase [Source:RGD Symbol;Acc:1308660]	ATTTCTGTGGCCTCTTTGAGACCCTTTCCCCCCATCATCTGCAACAAAGAGAAAAAGAGC
chr1	Glis3	-	225976028	unassigned	AATAAA	-1.13379	0.116739	1	N	Not Sig	ncbiRefSeq	GLIS family zinc finger 3 [Source:RGD Symbol;Acc:1565505]	TTTATCCAGTTTGTGAAGTGGATTAATAGAATAACCAATAAAACATGTATAAAAGCTTTA
chr1	Glrx3	+	192272011	3UTR	AATAAA	0.170517	0.597572	1	N	Not Sig	ncbiRefSeq	glutaredoxin 3 [Source:RGD Symbol;Acc:69414]	AACATATGTTACATTTTCCATGAAGCATAGAAGGCAATAAACTCCAGATTCAGCTAAAAA
chr1	Gmfg	+	83739187	3UTR	AATAAA	-0.0695177	1	1	N	Not Sig	ncbiRefSeq	glia maturation factor, gamma [Source:RGD Symbol;Acc:620506]	GACTGATAGGATATGAACATCCAAGAGCTAAATAAAGATTAAAATTTCAGGAATGTTAAT
chr1	Gna14	+	213897424	3UTR	AATACA	-1.48203	0.0127247	0.540424	N	Not Sig	ncbiRefSeq	G protein subunit alpha 14 [Source:RGD Symbol;Acc:1308122]	GCTGTTTGAACTGTGTACGCTGTGCCTTTCTGGATACTAAGAATACACTGTTCTACCCTC
chr1	Gnaq	+	213670897	3UTR	AATAAA	0.330541	0.851371	1	N	Not Sig	ncbiRefSeq	G protein subunit alpha q [Source:RGD Symbol;Acc:620770]	AGTGAAATATAGCAGAATGTTAACCCATATAAAAATAAAGTGTACCCAAATATTGTAATG
chr1	Gnaq	+	213671946	3UTR	AATACA	-0.0391845	0.969909	1	N	Not Sig	ncbiRefSeq	G protein subunit alpha q [Source:RGD Symbol;Acc:620770]	CCTAATGTTGTATAATGCCCCGATGATCTTACTGGTTAAAAATACAGTATTTTCGGCCAT
chr1	Gng3	-	205731836	5UTR	none	-0.0174273	0.938961	1	N	Not Sig	ncbiRefSeq	G protein subunit gamma 3 [Source:RGD Symbol;Acc:620805]	CTGGGGACCGCCATTTTAAGAACAGTGCCGTGCACCCTTAGCGCGTGCCTCCATGCGGGT
chr1	Gng3	-	205732061	3UTR	AACAAA	-3.86717	3.94444e-31	6.14248e-28	Y	FDR<0.05	ncbiRefSeq	G protein subunit gamma 3 [Source:RGD Symbol;Acc:620805]	CGCCGCTTTTGAGCGCTCATTTTAACAAACCCCCACTGGGGGCGCTCGGGCGCCTTATAC
chr1	Gng3	-	205732170	3UTR	none	0.734396	0.000338113	0.0344799	N	FDR<0.05	ncbiRefSeq	G protein subunit gamma 3 [Source:RGD Symbol;Acc:620805]	TCCCTGAATATGGCAAGTGTATCGACTAAGGATCCTCTTTCCCAAGAACGCTAACACAGG
chr1	Gng8	+	77568370	3UTR	AGTAAA	0.0816432	1	1	N	Not Sig	ncbiRefSeq	G protein subunit gamma 8 [Source:RGD Symbol;Acc:620808]	GTGCCTGCACTTTAGGGGAAAATGAGGCACGGGCAAAAACGTGGGGGCCACCTTTGTGGG
chr1	Golga7b	+	241080890	3UTR	AATAAA	-0.289852	0.694512	1	N	Not Sig	ncbiRefSeq	golgin A7 family, member B [Source:RGD Symbol;Acc:1583839]	AGATGAAGACCTTTTGTTTTATTCTTTTCCCAATAAAAGGACTTGCCAGCTTGAGGCTCC
chr1	Got1	-	242357292	unassigned	none	-0.0160503	0.875477	1	N	Not Sig	ncbiRefSeq	glutamic-oxaloacetic transaminase 1 [Source:RGD Symbol;Acc:2721]	TCTAAAGACTTCTTTCTAAATTGTGGGTCACAACTCATTAATGGATCACAAACTCAATTA
chr1	Got1	-	242357478	exon	TATAAA	0.297012	0.938935	1	N	Not Sig	ncbiRefSeq	glutamic-oxaloacetic transaminase 1 [Source:RGD Symbol;Acc:2721]	TCAGTTAAATATGTAAATCCACTTGTGTGTCATGATATAAATACTGGCCACAGTGGCCTT
chr1	Got1	-	242357674	exon	none	0.171922	0.888268	1	N	Not Sig	ncbiRefSeq	glutamic-oxaloacetic transaminase 1 [Source:RGD Symbol;Acc:2721]	GGGACAGGACTCTGTACAGACTCAAGCAACGTGCAGAAGCCCACGGCTTCGTGGGCAACA
chr1	Gpam	-	254106322	unassigned	ATTAAA	-0.155749	0.807053	1	N	Not Sig	ncbiRefSeq	glycerol-3-phosphate acyltransferase, mitochondrial [Source:RGD Symbol;Acc:61847]	AGGCAACGTGAGCAACGCAGTCTCAACACAACAATTCAAGACATTAAAGAGAAGTCGGGG
chr1	Gpatch1	-	87925605	unassigned	AAGAAA	-0.131461	0.788418	1	N	Not Sig	ncbiRefSeq	G patch domain containing 1 [Source:RGD Symbol;Acc:1308935]	GCCTTCGATCTTCTCTCCTTTTTAAAGTCTCCAGCACATTGCAAAAGAAATCAAGAAGCA
chr1	Gpi	-	86828210	unassigned	GATAAA	0.032043	0.993245	1	N	Not Sig	ncbiRefSeq	glucose-6-phosphate isomerase [Source:RGD Symbol;Acc:2727]	CCCGAAAAAACGCAGAGGCAGGGTCACCCACACCCGACAGATAAAGCACCACCTCAGTAA
chr1	Gpi	-	86828370	3UTR	none	-1.46905	0.0923683	1	N	Not Sig	ncbiRefSeq	glucose-6-phosphate isomerase [Source:RGD Symbol;Acc:2727]	CCTGCTTCAACAGGGGGAGGGTGCACAGAGGGGGCGGACAGCAGCTCCAGACCAGCTTCT
chr1	Gpr137	-	204129635	unassigned	none	-0.00256322	0.892779	1	N	Not Sig	ncbiRefSeq	G protein-coupled receptor 137 [Source:RGD Symbol;Acc:1586317]	ATCATCCTGATACCAAGCAGGACGAGGTAAGAGGGAACAGAACTCAGACAAGTGACCGGA
chr1	Gpr26	+	186784567	3UTR	AACAAG	0.688942	1	1	N	Not Sig	ncbiRefSeq	G protein-coupled receptor 26 [Source:RGD Symbol;Acc:619843]	GGTGGACAGGAACTGCCACCATTGTCCAGCGATTGACATAATGCTGATGTCTGAACAAGA
chr1	Gpr26	+	186805433	3UTR	AATAAA	-1.05259	0.278574	1	N	Not Sig	ncbiRefSeq	G protein-coupled receptor 26 [Source:RGD Symbol;Acc:619843]	ACCAGTTGACCTTGCAGAAGTTCTCGGTCTAATGAATAAATAATGAGTAAGATGTTAAGC
chr1	Gpr4	+	78877123	3UTR	none	-0.846859	0.893443	1	N	Not Sig	ncbiRefSeq	G protein-coupled receptor 4 [Source:RGD Symbol;Acc:1311604]	ATACCTAGCATGCTGGCAATTCTTTCTGGTTTGTCTTTTGGAAAAAGAGTGGTTATTTAT
chr1	Gprc5b	-	173316397	3UTR	none	0.0141138	0.621758	1	N	Not Sig	ncbiRefSeq	G protein-coupled receptor, class C, group 5, member B [Source:RGD Symbol;Acc:1309510]	TGCCTCAGTACCAAATCCTTAGCCGGTGTCAGCCACTCCGTGTGGAAGGACGGTGCATCC
chr1	Gprc5b	-	173316903	3UTR	none	-0.0644551	0.849281	1	N	Not Sig	ncbiRefSeq	G protein-coupled receptor, class C, group 5, member B [Source:RGD Symbol;Acc:1309510]	AAAGGCCCAGACATGGCTGACAGCCTCCTCTGTAGGTCTGACTGACAAGCTACCACGCGT
chr1	Gramd1a	-	86367000	unassigned	none	-0.253083	0.912845	1	N	Not Sig	ncbiRefSeq	GRAM domain containing 1A [Source:RGD Symbol;Acc:1311022]	TGATGGCAGGGTGAGTGGGAGGCCCCCATCCACTCCCAAGACTCCGACAGGCACAGCCAT
chr1	Grik5	-	80605877	unassigned	ACTAAA	-0.165951	1	1	N	Not Sig	ncbiRefSeq	glutamate ionotropic receptor kainate type subunit 5 [Source:RGD Symbol;Acc:2735]	GCAAACTCCAAGGGCCTAAAAACTCCCGTTGACCTCCCAGACCCAGAAAATCAAACCCAG
chr1	Grin2d	-	96306870	CDS	none	-0.160298	0.83376	1	N	Not Sig	ncbiRefSeq	glutamate ionotropic receptor NMDA type subunit 2D [Source:RGD Symbol;Acc:2740]	TAGACCTGGGATGGGCCTTCGGATCCTAGATCGTAGGTTTCAGCCTCCATGGGCTCCCCG
chr1	Grin2d	-	96307996	intron	none	0.404536	0.593482	1	N	Not Sig	ncbiRefSeq	glutamate ionotropic receptor NMDA type subunit 2D [Source:RGD Symbol;Acc:2740]	CATTTTTTCTCCAGAGAAGTTGAAGGGACCTAAGAGACAGACACAGAACTCAGGCTTGGA
chr1	Grk2	-	201581479	unassigned	none	0.0426561	0.768132	1	N	Not Sig	ncbiRefSeq	G protein-coupled receptor kinase 2 [Source:RGD Symbol;Acc:2062]	CAAGTCTGGGGAGACAAGGGCCTTCTCTCACCAGTGGCAAGAGGGCAGGACAGAGAGGTC
chr1	Grk5	+	260223696	3UTR	ATTAAA	0.453068	0.499465	1	N	Not Sig	ncbiRefSeq	G protein-coupled receptor kinase 5 [Source:RGD Symbol;Acc:61985]	ATGATCATCATCTGCTGGTCTTTGTTATATACTAACCAGATAAATTAAAATTTGTTTTCT
chr1	Grm1	-	5058284	intron	none	-0.166965	0.765527	1	N	Not Sig	ncbiRefSeq	glutamate metabotropic receptor 1 [Source:RGD Symbol;Acc:2742]	ATGTGTTATTCTAGACTACTTCTGCTAGTGTAATGCTTAGAAAGTTCAGAGAAGGAATAT
chr1	Grm5	+	141884849	3UTR	ATTAAA	-0.457691	0.237645	1	N	Not Sig	ncbiRefSeq	glutamate metabotropic receptor 5 [Source:RGD Symbol;Acc:2746]	TGAAGCCAGTTACTTTTTGAAAGACATTAAAAAGCAAACTATGATATGACTTCAAGCTTA
chr1	Grm5	+	141884979	3UTR	AATAAA	0.207212	0.438694	1	N	Not Sig	ncbiRefSeq	glutamate metabotropic receptor 5 [Source:RGD Symbol;Acc:2746]	ATATTGTGAATCATATACACATTTGAATTATGATCACGGAATAATAAATTAAAATAAATC
chr1	Grwd1	-	96301259	unassigned	AAGAAA	-0.157237	0.664734	1	N	Not Sig	ncbiRefSeq	glutamate-rich WD repeat containing 1 [Source:RGD Symbol;Acc:1310649]	CCATTTCCCTCCTTACTACCATTAGGTTTCTCACAGAAAAGAAGCTCCAAGGACTGGTGT
chr1	Gsg1l	-	180440402	unassigned	none	-0.448818	0.430587	1	N	Not Sig	ncbiRefSeq	GSG1-like [Source:RGD Symbol;Acc:1562278]	CCCTCCCTTTCTTCTCTCCTGGCAATAACCCCGTTCCAGTCACCCACATACCACAATCAC
chr1	Gsk3a	-	80815842	3UTR	GATAAA	-0.00922656	0.808389	1	N	Not Sig	ncbiRefSeq	glycogen synthase kinase 3 alpha [Source:RGD Symbol;Acc:620351]	TGGAACTCATTCCAAACCCTGAACCCCCACCTCTGTGGAAATAGGCAGCCAGACAGGAAG
chr1	Gsto1	+	246731226	3UTR	none	0.29172	0.41778	1	N	Not Sig	ncbiRefSeq	glutathione S-transferase omega 1 [Source:RGD Symbol;Acc:70952]	GAGCCCTCAGCGAATGATGTTTTCCTTCATCGATTGAATAGCATGCTTTTATTTTACCCA
chr1	Gsto2	+	246753867	3UTR	AATAAA	0.640935	0.998186	1	N	Not Sig	ncbiRefSeq	glutathione S-transferase omega 2 [Source:RGD Symbol;Acc:1310764]	TTGTTTTTTTTTTGCTTTTTTGTTTTTTTGAGGTCCCTAATAAACATGGACGTGTAAAAT
chr1	Gsto2	+	246757590	3UTR	AATAAA	2.29049	0.0211297	0.746103	N	Not Sig	ncbiRefSeq	glutathione S-transferase omega 2 [Source:RGD Symbol;Acc:1310764]	GAACAATCATGTACATGTGGTTTTTTTTTTTACTGTCAATAAACGTACTTTAAAAAAATA
chr1	Gstp1	-	201337761	unassigned	none	0.218785	0.648256	1	N	Not Sig	ncbiRefSeq	glutathione S-transferase pi 1 [Source:RGD Symbol;Acc:2758]	TCTACCCTTTCCCAGCCTGAAGTTCCCAGAGCCCCTTTCACTAGGAAACAGCAGCCAAGG
chr1	Gtf2h1	+	97349455	exon	AATAAA	-0.232604	0.646963	1	N	Not Sig	ncbiRefSeq	general transcription factor IIH subunit 1 [Source:RGD Symbol;Acc:1308225]	GTGAGAAATATAAGAATTGCTTATTTTCACCTGTTTAGAAGAATAAAGGAAGTTTCTCAT
chr1	Gtf2h5	+	46662300	3UTR	none	1.0014	0.619122	1	N	Not Sig	ncbiRefSeq	general transcription factor IIH subunit 5 [Source:RGD Symbol;Acc:1560991]	TTTCTCTTACCCAGAAGTGAGAGCTCTAGTGTTAAGCACTTGGCAATCCCAACCACAGAC
chr1	Gtf2h5	+	46662465	3UTR	ATTAAA	0.0239749	0.999551	1	N	Not Sig	ncbiRefSeq	general transcription factor IIH subunit 5 [Source:RGD Symbol;Acc:1560991]	TTTTGATGGACCATTAAAAAAATCTTTGTAAAGAAGAATTTTAACAACTGGCTGCAATTT
chr1	Gtf2h5	+	46662705	3UTR	ATTAAA	-0.019185	0.928677	1	N	Not Sig	ncbiRefSeq	general transcription factor IIH subunit 5 [Source:RGD Symbol;Acc:1560991]	AATGTAATCATAAATGTTTTCCCTGCCTTTTTAAAACACCAATTAAATACACCAGAAAAA
chr1	Gtf2h5	+	46663166	3UTR	ATTAAA	1.10896	0.313974	1	N	Not Sig	ncbiRefSeq	general transcription factor IIH subunit 5 [Source:RGD Symbol;Acc:1560991]	ATAAATGTTATATTTTTATCCATATGCTCTGATGCAATTAAACCAAGTATTACTCTTTTT
chr1	Gtf2h5	+	46663511	3UTR	none	-1.56929	0.183669	1	N	Not Sig	ncbiRefSeq	general transcription factor IIH subunit 5 [Source:RGD Symbol;Acc:1560991]	GATCTGTGAGTTCAAGATTGACCTGGTCTACAGAGTGAGTTCCAAAACAGACAGGACTAC
chr1	Gtf3c1	-	180203994	unassigned	AACAAA	-0.0510269	0.973751	1	N	Not Sig	ncbiRefSeq	general transcription factor IIIC subunit 1 [Source:RGD Symbol;Acc:621048]	AAAAAAATCTCAAGAAGAGGAGTTCTCTGGGAAACAACAATCACTAGGCAAACACACAAA
chr1	Gys1	+	95935292	3UTR	AATACA	-0.19342	0.578507	1	N	Not Sig	ncbiRefSeq	glycogen synthase 1 [Source:RGD Symbol;Acc:1589798]	AGAAGGTGTGTGATTGGAGTGTGTTCAGAGATGAAAAAATACAGCTGTATTTAAGACTGC
chr1	Hapln3	-	133046464	unassigned	CATAAA	-0.344888	0.995323	1	N	Not Sig	ncbiRefSeq	hyaluronan and proteoglycan link protein 3 [Source:RGD Symbol;Acc:1308098]	GGCTCTCCCTCAGGAGAGTACAGTGGACCTCAAATACCCCCAGAGAAGGATGCCAAGAGA
chr1	Haus5	-	85912370	unassigned	GATAAA	0.131072	1	1	N	Not Sig	ncbiRefSeq	HAUS augmin-like complex, subunit 5 [Source:RGD Symbol;Acc:2318093]	GAACGACAGCCAGAGAGGACCTGCAGATCTGTGCCAAGACAAAGTTGATAAAACTGGGCA
chr1	Haus5	-	85912868	CDS	none	0.890955	0.848649	1	N	Not Sig	ncbiRefSeq	HAUS augmin-like complex, subunit 5 [Source:RGD Symbol;Acc:2318093]	CCGATATTCAACTGCCCCCATCTTACCAGTCCTCAACGATCCCCTGTAGCTCAGGGATTT
chr1	Hbb	-	158250420	unassigned	none	0.300576	0.324656	1	N	Not Sig	ncbiRefSeq	hemoglobin subunit beta [Source:RGD Symbol;Acc:2783]	TTGTATCTTGAATCCTAAGCATGAACCCTTCTATGAGATACAATTAATTTAACACACCAT
chr1	Hbb-b1	-	158224174	unassigned	none	0.161634	0.690886	1	N	Not Sig	ncbiRefSeq		TAGCATGAACCCTTCTGTGAGACACAATTAATTTAACACATTTAACACTATATTTCATTG
chr1	Hbb-bs	-	158218355	unassigned	ATTAAA	0.124597	0.749012	1	N	Not Sig	ncbiRefSeq		TTTATATCATAAATGCTTCACATTAATCCTTCCAAGAAACACAAGTAATTAAAACACACC
chr1	Hbs1l	+	16110718	intron	AATAAT	-0.264352	0.834035	1	N	Not Sig	ncbiRefSeq	HBS1-like translational GTPase [Source:RGD Symbol;Acc:1308509]	TGTGTGTGTGTGTGTGTGTGTGTGTGTGTGTGTGTGTGATTTAATAATTTATGCCTCATA
chr1	Hbs1l	+	16169882	3UTR	none	0.277749	0.982385	1	N	Not Sig	ncbiRefSeq	HBS1-like translational GTPase [Source:RGD Symbol;Acc:1308509]	TGTGTGTGTTCTAAGGAAGCCTATCTTACTGGGGCTGGGAGAGTCCATCTGTGACCTGGT
chr1	Hbs1l	+	16170081	3UTR	AATAAA	0.0495429	0.946617	1	N	Not Sig	ncbiRefSeq	HBS1-like translational GTPase [Source:RGD Symbol;Acc:1308509]	AGATACTATTTAAGTTGAAAAGCCAGCTAATAAAATGCCTTAGTTTGAATGCCTTGCAAA
chr1	Hcst	-	85676975	unassigned	CATAAA	-1.1955	0.635167	1	N	Not Sig	ncbiRefSeq	hematopoietic cell signal transducer [Source:RGD Symbol;Acc:1359238]	AAAACGGTCATAAATCAGGGAATCGCTACTTGGGAGGAGGTCAGACTTTGAGAAGAACAA
chr1	Hddc2	-	26294029	unassigned	AAGAAA	-0.157169	0.727205	1	N	Not Sig	ncbiRefSeq	HD domain containing 2 [Source:RGD Symbol;Acc:1307562]	AAGGACATAGCCTGGTAGGCCTGAGTAGAAGAATTGAAGAAATCCAGAACAGAAGCCAAA
chr1	Hddc3	+	134301058	3UTR	AATAAA	0.0639018	0.815474	1	N	Not Sig	ncbiRefSeq	HD domain containing 3 [Source:RGD Symbol;Acc:1311839]	GACTGGATAAGCCTTGGTTTATAAGTCGTGGAAAATAAAGCATTTAGGGTAAAGGCTTAA
chr1	Hddc3	+	134301757	3UTR	none	-1.78046	0.728157	1	N	Not Sig	ncbiRefSeq	HD domain containing 3 [Source:RGD Symbol;Acc:1311839]	GGGGATAGGGCCCCCACAGCCTTTCTATAATTCTCCTGCCTCTGCGACAAAGCGCAACCA
chr1	Hdgfl3	-	135822599	intron	AATAAA	0.147015	0.753623	1	N	Not Sig	ncbiRefSeq	HDGF like 3 [Source:RGD Symbol;Acc:628773]	TGTCTTATTCGTGTAAAATATTAATATTGAACAATAAACTCTTAAGGCACTGCAACTTAA
chr1	Hdgfl3	-	135824785	3UTR	AACAAG	-0.170087	0.800051	1	N	Not Sig	ncbiRefSeq	HDGF like 3 [Source:RGD Symbol;Acc:628773]	ACTACCATAGGTATAGAAGTATGCTGAAAGATTCTTTTGTATTCTGACAGTAACAAGACC
chr1	Hdgfl3	-	135827539	3UTR	AATAAA	-0.0801408	0.68179	1	N	Not Sig	ncbiRefSeq	HDGF like 3 [Source:RGD Symbol;Acc:628773]	TTTCATAGGTGGCTGGCTGATTATTTCTCTTGTGTTTCTGTGTATATCTTCAATAAAATT
chr1	Hectd2	+	234343487	3UTR	ATTAAA	0.76838	0.142433	1	N	Not Sig	ncbiRefSeq	HECT domain E3 ubiquitin protein ligase 2 [Source:RGD Symbol;Acc:1305536]	CTGTATTGTATTGAGTTTATCTGTGTACATTTTCAAGTATTAAAATTATACAGTCAGTCA
chr1	Herc2	+	107107981	3UTR	AACAAA	-0.758873	0.56113	1	N	Not Sig	ncbiRefSeq	HECT and RLD domain containing E3 ubiquitin protein ligase 2 [Source:RGD Symbol;Acc:1307989]	ATTATTATTTCTTCAGTGCATTTAAAAGTTACTTAGAACAGAAAACAAAAATGCCATTCA
chr1	Herc2	+	107108135	3UTR	AATAAA	-0.0609398	0.972226	1	N	Not Sig	ncbiRefSeq	HECT and RLD domain containing E3 ubiquitin protein ligase 2 [Source:RGD Symbol;Acc:1307989]	TAATGTCTATGTCATGTTTATGCCAAAATTTTAATCCCCTATAAATAAAACATGTGTCAC
chr1	Herc2	+	107110994	3UTR	AATAAA	-0.0598203	0.953175	1	N	Not Sig	ncbiRefSeq	HECT and RLD domain containing E3 ubiquitin protein ligase 2 [Source:RGD Symbol;Acc:1307989]	CCAAGAAACTGAGGCATGAGCATGCTTTTGGTCACTGGCCAATAAAGGACTACTATACTT
chr1	Hey2	+	26832214	3UTR	ATTAAA	0.198543	0.765149	1	N	Not Sig	ncbiRefSeq	hes-related family bHLH transcription factor with YRPW motif 2 [Source:RGD Symbol;Acc:621405]	TGTAACTTTTTTCTATGCAAAAGTCTACGTGTCACTAATTAAATGACGTCCTTTTTGACT
chr1	Hhex	+	235196039	3UTR	AATGAA	-1.21354	0.37406	1	N	Not Sig	ncbiRefSeq	hematopoietically expressed homeobox [Source:RGD Symbol;Acc:619932]	TTGTAAAAAAAACCCTGCAAAAATGTTTGATTTTTTTTTTAATTTAATGAATTAACTTTC
chr1	Hiatl3	+	66758919	3UTR	AATAAA	-0.396981	0.603804	1	N	Not Sig	ncbiRefSeq		TAAGGTCTCAAATGTAAATATTCTGTTAATAAAATTAAATATTTTAATGATTTTTTTCTT
chr1	Hif1an	+	243436274	3UTR	AATAAA	-0.111795	0.609869	1	N	Not Sig	ncbiRefSeq	hypoxia inducible factor 1 subunit alpha inhibitor [Source:RGD Symbol;Acc:1308281]	CTGTAAAGCTTTAGCACAGTGCCTGGCAAGCACTTAATAAATGGCTGTGGTGGTGGTTTA
chr1	Hif3a	-	77718109	unassigned	none	0.0901227	1	1	N	Not Sig	ncbiRefSeq	hypoxia inducible factor 3 subunit alpha [Source:RGD Symbol;Acc:70332]	CCCAGCCACACAGTGTACCCCCAACCTCCAAAGCAACCCCACAGATGAGTCAACACAGGT
chr1	Hikeshi	-	143825921	unassigned	AATAAA	0.20379	0.594062	1	N	Not Sig	ncbiRefSeq	heat shock protein nuclear import factor hikeshi [Source:RGD Symbol;Acc:1359455]	ACAAACAAGTTAGCTACTCCAGCAAAGTACTGTGAGAATAAACGAAAGGTTACACAGGCG
chr1	Hikeshi	-	143826113	3UTR	none	-1.26635	0.66373	1	N	Not Sig	ncbiRefSeq	heat shock protein nuclear import factor hikeshi [Source:RGD Symbol;Acc:1359455]	TTGTTCAACGGTTCTAATTTTTATAAGGGTTTTATAAGTCTCATAGTCACTAAGCAGGTT
chr1	Hint3	+	27045798	3UTR	AATAAA	0.00831074	0.914021	1	N	Not Sig	ncbiRefSeq	histidine triad nucleotide binding protein 3 [Source:RGD Symbol;Acc:621603]	TTTTATGACAGTTGTATAGTCTTACACATAAATATTCAAAATAAAGAATACCATGCCACT
chr1	Hipk4	+	82821077	3UTR	AATAAA	0.0686683	1	1	N	Not Sig	ncbiRefSeq	homeodomain interacting protein kinase 4 [Source:RGD Symbol;Acc:1307541]	CATTGGCCATGCGTGTGCCCGGGCCTGCCTGCCTCTGTGTATTTCAATAAATAACTGTTC
chr1	Hirip3	+	181475081	3UTR	AATAAA	-0.235473	0.668966	1	N	Not Sig	ncbiRefSeq	HIRA interacting protein 3 [Source:RGD Symbol;Acc:1306463]	CATTTGAGGCGGTTGTTGTTTTATTTTTAAAGACTCAATAAAATGTAATTACTTTATCCA
chr1	Hivep2	+	8555991	3UTR	AATAAA	0.0442225	0.769349	1	N	Not Sig	ncbiRefSeq	HIVEP zinc finger 2 [Source:RGD Symbol;Acc:61988]	GTATATTGAATTACATTAAGGAGTGTTCTTTAAAAAGAGAAATAAATATACAATTACATG
chr1	Hnrnpl	+	84111568	3UTR	AATAAA	-0.0115205	0.728937	1	N	Not Sig	ncbiRefSeq	heterogeneous nuclear ribonucleoprotein L [Source:RGD Symbol;Acc:71059]	GCCCATGTATCTTGGCACATTTCAATAAAATTGTTTGGAAAATAAAACTATTCGCTGGGG
chr1	Hnrnpul1	-	81228403	unassigned	ATTAAA	-0.483609	0.573758	1	N	Not Sig	ncbiRefSeq	heterogeneous nuclear ribonucleoprotein U-like 1 [Source:RGD Symbol;Acc:1307456]	GGAATTTCATTTTCCCTTTGAAGGCCTCCCATCCCAATTAAAGGCCAACTGCAGTAACAC
chr1	Hnrnpul1	-	81228715	3UTR	none	-0.450928	0.404679	1	N	Not Sig	ncbiRefSeq	heterogeneous nuclear ribonucleoprotein U-like 1 [Source:RGD Symbol;Acc:1307456]	CCCCACCTTCCCTTCACCCTCTCCCCCGCTTAAGCCCACCAGAAACTACCAAGACTCCTG
chr1	Hoga1	+	240884241	3UTR	none	0.281179	0.667958	1	N	Not Sig	ncbiRefSeq	4-hydroxy-2-oxoglutarate aldolase 1 [Source:RGD Symbol;Acc:1310475]	ACAGGCTCAAGACTGCTTAAAAGTCCAAAATTCAAAGTCTCTTCTGAGGCTCACTGTAAA
chr1	Homer2	-	135558976	unassigned	none	-1.46218	0.0128576	0.543941	N	Not Sig	ncbiRefSeq	homer scaffold protein 2 [Source:RGD Symbol;Acc:620705]	CGAAGGCCTTTCCAAAGGTTTCTGTCAGCTTAAAAACACAGAGATTTCACCGAGCCATGG
chr1	Hps1	-	241551179	unassigned	none	0.0808986	0.953631	1	N	Not Sig	ncbiRefSeq	HPS1, biogenesis of lysosomal organelles complex 3 subunit 1 [Source:RGD Symbol;Acc:69193]	TATGGTATTAAGGAGGCAGATGATTCTCAGTGCCACAGGGAAGACCAGGAACGGGCTTGG
chr1	Hps5	-	97281625	unassigned	AATACA	-0.0442041	0.944057	1	N	Not Sig	ncbiRefSeq		TCCACACTGGATTTACCTAATACATTCCTTCAAATTGCTCCAAACAAATCTCATGTCCAT
chr1	Hps6	+	244855865	3UTR	AATACA	-0.131974	0.953682	1	N	Not Sig	ncbiRefSeq	HPS6, biogenesis of lysosomal organelles complex 2 subunit 3 [Source:RGD Symbol;Acc:631341]	TGTGTGTGCAATACTGTCTGTTGTGGGACAAATTTTAAAATACATGCAAATAGCAAATAT
chr1	Hs3st2	+	176077400	intron	AATAAA	0.177217	0.891286	1	N	Not Sig	ncbiRefSeq	heparan sulfate-glucosamine 3-sulfotransferase 2 [Source:RGD Symbol;Acc:727787]	TCGGCATGCACGGGATCATGCTTGTCCATGTGAAATAAATATGGCTTTCTCGTGTCCTTC
chr1	Hs3st4	+	178944851	3UTR	TATAAA	-0.222422	0.779792	1	N	Not Sig	ncbiRefSeq	heparan sulfate-glucosamine 3-sulfotransferase 4 [Source:RGD Symbol;Acc:11422907]	AAACTGTCATTTCTCCCACTAAATGGAAACTGTGTTGTTATAAAGCTTAATGCAACCTGA
chr1	Hsd3b7	+	182415445	3UTR	ATTAAA	0.142031	0.837932	1	N	Not Sig	ncbiRefSeq	hydroxy-delta-5-steroid dehydrogenase, 3 beta- and steroid delta-isomerase 7 [Source:RGD Symbol;Acc:628727]	CTTCCTCCCTGAGGATGCCAACCTGTATCTGGCCACACCTGGATTAAAATCCTTTGCCAA
chr1	Hspa12a	-	257935641	unassigned	AGTAAA	-0.17744	0.635075	1	N	Not Sig	ncbiRefSeq	heat shock protein family A (Hsp70) member 12A [Source:RGD Symbol;Acc:1305531]	GTCATGATCCCTCCGCAACTCCATCTACACCCCAAATGAGAAAAAACTATTCTAGGCCAT
chr1	Hspb6	+	85809072	3UTR	AATAAA	-0.0981461	0.666578	1	N	Not Sig	ncbiRefSeq	heat shock protein family B (small) member 6 [Source:RGD Symbol;Acc:621554]	TTCCTGTCTCCCCAGGCCTTCCTGCCATTAGTTCCCAATAAATGCACTTGAGATTTGTCA
chr1	Hspbp1	+	69188948	3UTR	none	0.259429	1	1	N	Not Sig	ncbiRefSeq	HSPA (Hsp70) binding protein 1 [Source:RGD Symbol;Acc:628677]	CCCAAGGGATTGCCAGGCCTTGTTTGGGCCTGCGCCTGGGCCTGCCAGCCCATCTCTAGG
chr1	Hspbp1	+	69189059	3UTR	AATAAA	0.0650802	0.73299	1	N	Not Sig	ncbiRefSeq	HSPA (Hsp70) binding protein 1 [Source:RGD Symbol;Acc:628677]	CCTTGCTTTCTGTCTTTCATGTCCACACTGCTCTTCAAATAAAAACATTTCTCCTGCTCT
chr1	Htatip2	+	99488632	3UTR	AATAAA	-0.546832	0.228747	1	N	Not Sig	ncbiRefSeq	HIV-1 Tat interactive protein 2 [Source:RGD Symbol;Acc:1309941]	AGAGGCTGTAAAACAAGCTTCTGTAATTCTCTGAGGAATAAAAATAAATGGAGAAACCCT
chr1	Htr7	-	233636441	unassigned	none	-0.456476	0.373033	1	N	Not Sig	ncbiRefSeq	5-hydroxytryptamine receptor 7 [Source:RGD Symbol;Acc:71034]	AGCAAGCGAGCGCACCCTACCCCAGCCGACCGTTGTAGAGCAACATATATGACATCAGAC
chr1	Htra1	+	185547380	3UTR	ATTAAA	-0.202844	0.978741	1	N	Not Sig	ncbiRefSeq	HtrA serine peptidase 1 [Source:RGD Symbol;Acc:69235]	AATCCTGGAATCAGGAGTACAATGACTTTGAGTTTCAGCTATTAAAATACTTCTTCATAC
chr1	Ice1	+	32679903	3UTR	AATAAA	-0.812621	0.317924	1	N	Not Sig	ncbiRefSeq	interactor of little elongation complex ELL subunit 1 [Source:RGD Symbol;Acc:1309747]	TCTTAAAACTCTTGTATGTGTTTTTATAATAAAAAAATAAAACAAGCCATACACACTTGT
chr1	Ide	-	235002983	unassigned	AATACA	-0.0250104	0.961912	1	N	Not Sig	ncbiRefSeq	insulin degrading enzyme [Source:RGD Symbol;Acc:2861]	CGGATGCTGACAGGGAAGCTGGAGTATTTCACTGAAACTGTAAAGTAATACAACACGGGA
chr1	Ide	-	235023687	intron	TATAAA	0.890955	0.848649	1	N	Not Sig	ncbiRefSeq	insulin degrading enzyme [Source:RGD Symbol;Acc:2861]	ACTTTTTAAAAATATGGCATTATAACTATATCAATGGAAATTATAAAAGTATCGGACTTA
chr1	Idh2	-	134038643	unassigned	none	0.360577	0.315032	1	N	Not Sig	ncbiRefSeq	isocitrate dehydrogenase (NADP(+)) 2 [Source:RGD Symbol;Acc:1597139]	CTGTCCCTGGGGCATCCTACCAGCTACTTCCTCTCACTCAGGGACAAAGACATCAAGACC
chr1	Ifit1	+	232154103	3UTR	none	1.75808	0.490521	1	N	Not Sig	ncbiRefSeq	interferon-induced protein with tetratricopeptide repeats 1 [Source:RGD Symbol;Acc:620599]	CTGGTGCCATTGTAAAGGACGCACCTCTATGTTTGCATGGTTTCTTGGTTATCTTTCATC
chr1	Ifit1bl	-	232122617	intron	AATACA	-2.17391	0.113426	1	N	Not Sig	ncbiRefSeq	interferon-induced protein with tetratricopeptide repeats 1B-like [Source:RGD Symbol;Acc:1304872]	TTCTGGTTCCATACAATCATAGAATACAGATCTTAATGTTCCAAACAAAGTACACTCAAA
chr1	Ifit2	+	232108635	3UTR	AATAAA	0.485319	0.425667	1	N	Not Sig	ncbiRefSeq	interferon-induced protein with tetratricopeptide repeats 2 [Source:RGD Symbol;Acc:1307804]	CTGGAACTGTACTGTACCTTCGCTTTTTTAGACTCAAGTGCAGATAATAAAGAGTAACAT
chr1	Ifit3	+	232119310	3UTR	AATAAA	0.462311	0.342362	1	N	Not Sig	ncbiRefSeq	interferon-induced protein with tetratricopeptide repeats 3 [Source:RGD Symbol;Acc:1359681]	ACAGTGATCCTGCAGTATGCCAAATTGAAATTGTAGAATAAATTTAAAAGTTTCAACTAA
chr1	Ifitm1	+	196069156	3UTR	AATAAA	-0.559731	0.735447	1	N	Not Sig	ncbiRefSeq	interferon induced transmembrane protein 1 [Source:RGD Symbol;Acc:1307601]	TACTCACATGGCTGTTCATAGTGGATTCAATAAAATACATGTGCTGCGACCTTCTGTCCC
chr1	Ifitm10	-	197507500	unassigned	none	0.147858	0.6522	1	N	Not Sig	ncbiRefSeq	interferon induced transmembrane protein 10 [Source:RGD Symbol;Acc:1563319]	AGCACCCCCAAACCTCCAGGTGACATCTAGGCCCTGCTTGGAACACGGACAGAAGCTGAA
chr1	Ifitm2	-	196051538	intron	none	0.345416	0.627803	1	N	Not Sig	ncbiRefSeq	interferon induced transmembrane protein 2 [Source:RGD Symbol;Acc:69332]	CTCCTCAGACAAGAAGGATGCTGGGCGAGCTCAGTACAGAACAGGAGTCACAGCCAGAGT
chr1	Ifitm3	-	196111025	unassigned	AATAAA	0.336207	0.679722	1	N	Not Sig	ncbiRefSeq	interferon induced transmembrane protein 3 [Source:RGD Symbol;Acc:1595844]	CATGCCCACCTCAGAGCGAGGAAGATTGAGGGGTAGGATGAATAAAAGCAGCCCAAGGAT
chr1	Ifitm6	-	196117032	unassigned	none	-0.177072	0.808496	1	N	Not Sig	ncbiRefSeq	interferon induced transmembrane protein 6 [Source:RGD Symbol;Acc:1304718]	AAGAAGGAAGTCAGGGAAACTTTGAGTAAGCTTAGTACAGGACCAGTCAGGGGACAATGA
chr1	Ifngr1	+	14351799	3UTR	AGTAAA	-0.142766	0.646431	1	N	Not Sig	ncbiRefSeq	interferon gamma receptor 1 [Source:RGD Symbol;Acc:620570]	GCATACGTTTTTTTATGGGGCATCACTTATGATTTTTAAGTAAAATGTTTTGAAACCAGA
chr1	Igf1r	+	121838545	3UTR	AATAAA	0.415728	0.831029	1	N	Not Sig	ncbiRefSeq	insulin-like growth factor 1 receptor [Source:RGD Symbol;Acc:2869]	TCTGCTTTTTTCTAGTAGTTAAAGTACCACATGAATTAAGTTAAATAAAAGAATTCTGTA
chr1	Igf2	-	197814408	unassigned	AAGAAA	1.14883	0.151415	1	N	Not Sig	ncbiRefSeq	insulin-like growth factor 2 [Source:RGD Symbol;Acc:2870]	CCTGCCACCCTTCCTTTCCTTTGCCCCCTCCCCCAAGTGAAAGAGCAAAGAACTCAATAA
chr1	Igf2r	+	48067501	3UTR	AATAAA	0.162063	0.767217	1	N	Not Sig	ncbiRefSeq	insulin-like growth factor 2 receptor [Source:RGD Symbol;Acc:2871]	TTTTAATCAACTTTACTGTAATATGAAGTATTCAATTTCAATAAAAATAAATTATTAACT
chr1	Ighmbp2	-	200506640	unassigned	GATAAA	-0.424666	0.826178	1	N	Not Sig	ncbiRefSeq	immunoglobulin mu DNA binding protein 2 [Source:RGD Symbol;Acc:68325]	ATCCTTAGACCACACAATGCATGCCCACTGTGTCACTGCAGAAGAAAGGATAAAGGTGGC
chr1	Igsf6	-	175610166	intron	AATAAA	-2.34406	0.127718	1	N	Not Sig	ncbiRefSeq	immunoglobulin superfamily, member 6 [Source:RGD Symbol;Acc:620663]	ACACATGTGAATAAAAAATAAAATAAAAATTTTAAACAACAAACCATCCAGCCAAAACAC
chr1	Ikzf5	-	186169107	unassigned	CATAAA	-0.58016	0.0982419	1	N	Not Sig	ncbiRefSeq	IKAROS family zinc finger 5 [Source:RGD Symbol;Acc:1310965]	CTTTACTGTAAGTTACATAAAAATCAATTTGATTCTAGTTTTAAAAAACAAAAAACAGAA
chr1	Ikzf5	-	186172667	CDS	none	-0.405961	0.693262	1	N	Not Sig	ncbiRefSeq	IKAROS family zinc finger 5 [Source:RGD Symbol;Acc:1310965]	TCGTTAAGGTAGTCTGGTTTCTGGACCACCATGGAAGGCGGACTTAAGTTGATTAGTGCT
chr1	Il11	+	69076128	3UTR	AATAAA	-0.769754	0.458226	1	N	Not Sig	ncbiRefSeq	interleukin 11 [Source:RGD Symbol;Acc:621475]	TTCCACCATGACTGTATTTTGCATGACACGTTTACAAACAATAATAAACACTATTTTTAG
chr1	Il16	-	137617701	unassigned	AACAAA	-0.280183	0.667635	1	N	Not Sig	ncbiRefSeq	interleukin 16 [Source:RGD Symbol;Acc:1583872]	AATGACCAAAGCAAAATGTTATACTGGCCATGCACATGCTACAAACAACGCAAGGCAGTT
chr1	Il16	-	137617940	3UTR	none	-0.218352	0.757184	1	N	Not Sig	ncbiRefSeq	interleukin 16 [Source:RGD Symbol;Acc:1583872]	CTGTGATCACAGATGACTATCATTTAGTATCAAGCAGACAGAGTGCCTGACACGAGACAG
chr1	Il16	-	137626523	CDS	none	-0.281172	0.614435	1	N	Not Sig	ncbiRefSeq	interleukin 16 [Source:RGD Symbol;Acc:1583872]	TTTGTGTAGTCAACAGTCTCAAGAGAGGGTCTGGAGACAAAGCTTTCGGGTTGGGTCGCT
chr1	Il18bp	-	156372922	unassigned	none	-0.30132	0.799002	1	N	Not Sig	ncbiRefSeq	interleukin 18 binding protein [Source:RGD Symbol;Acc:620042]	AAAAAAAAAAAAAAAAAAAGTGTTAACAGGATGGATGGACACAAGGACAAACAGGAAGAA
chr1	Il27	-	181173107	3UTR	none	-0.0102518	1	1	N	Not Sig	ncbiRefSeq	interleukin 27 [Source:RGD Symbol;Acc:1561420]	CCCAAGCTGTTCTGATCTTTGGGTGTCAGGCCTTCCTGTGAAAACACGTGGAAACACAAA
chr1	Il33	+	227736373	3UTR	AATAAA	0.312801	0.498682	1	N	Not Sig	ncbiRefSeq	interleukin 33 [Source:RGD Symbol;Acc:1311155]	TAAGTAGCCAAATGTGTTCTTGACGTTGTTCACAACTTTGAATAAACTAAGTTTCAAAGC
chr1	Il4r	+	180139981	3UTR	AATAAA	0.727328	0.223447	1	N	Not Sig	ncbiRefSeq	interleukin 4 receptor [Source:RGD Symbol;Acc:2899]	GAGGGCAGGACAGAAGAGGTCACGTGGAGCTCTATGTCAATAAAGACTCTTTATCTTGTC
chr1	Ilk	+	160095137	3UTR	AATAAA	0.105196	0.856816	1	N	Not Sig	ncbiRefSeq	integrin-linked kinase [Source:RGD Symbol;Acc:620063]	GATGTCTCCCAACATGGGAGGGATCAGCCCCGCCTGTCACAATAAAGTTTATTATGAAAA
chr1	Ina	+	245908329	3UTR	ATTAAA	-0.019259	0.809062	1	N	Not Sig	ncbiRefSeq	internexin neuronal intermediate filament protein, alpha [Source:RGD Symbol;Acc:2911]	TGACCCCCCCCCCACACTGTAAGACATTAGTAATATTAAGAAATTAAAAGTCATTAATCC
chr1	Inafm1	-	76976807	unassigned	none	-1.90619	0.13753	1	N	Not Sig	ncbiRefSeq	InaF-motif containing 1 [Source:RGD Symbol;Acc:2301983]	CAGGCTGTGACTCTGAAAGGGCTGAAGGTCAAAGTGGATACGGTACAAACCAACGCTGTT
chr1	Incenp	-	206520654	unassigned	AATACA	-0.580942	0.626424	1	N	Not Sig	ncbiRefSeq	inner centromere protein [Source:RGD Symbol;Acc:1305292]	AGAGAATACCCTCACTTGGCAAAATACAAACACCATTTTCTATAATACGCCTAGACCACA
chr1	Ino80e	-	181461405	CDS	AAGAAA	0.232863	0.389944	1	N	Not Sig	ncbiRefSeq	INO80 complex subunit E [Source:RGD Symbol;Acc:1359572]	CCCCTCTCCCCAAGGTACTTGAGACCAGACGTGGATAAGAAATCCAAGCATAAGACGTGT
chr1	Ino80e	-	181462217	3UTR	none	0.527415	0.378046	1	N	Not Sig	ncbiRefSeq	INO80 complex subunit E [Source:RGD Symbol;Acc:1359572]	CTCTCCAGGCTGCCTGGTCCCCTGCCCCACAAGGAGGGGGTGGGATTAGGGGAGATTAGA
chr1	Inpp5a	+	194380427	intron	AATAAA	-0.444021	0.571455	1	N	Not Sig	ncbiRefSeq	inositol polyphosphate-5-phosphatase A [Source:RGD Symbol;Acc:1306168]	TCGAAGGCCTCTGGAAGTGACTGCTCGGTTCCTAAGCAATAAAATTGATCATGGTGAAAA
chr1	Inpp5f	+	183270096	3UTR	ATTAAA	-0.152543	0.794849	1	N	Not Sig	ncbiRefSeq	inositol polyphosphate-5-phosphatase F [Source:RGD Symbol;Acc:1305777]	GCCTTTGTTATTTATTACAAGTGTCAAGTCTTGTGACTATTAAAGTACCACTGTAATTCA
chr1	Inpp5f	+	183270275	3UTR	ATTAAA	-0.341836	0.767569	1	N	Not Sig	ncbiRefSeq	inositol polyphosphate-5-phosphatase F [Source:RGD Symbol;Acc:1305777]	ATTCTTCTATTTTAAAAATGAAAGCTGTATTTTAAATCCCAGACATTAAAAACTGAATAC
chr1	Inppl1	-	156183042	3UTR	AACAAA	0.355309	0.665948	1	N	Not Sig	ncbiRefSeq	inositol polyphosphate phosphatase-like 1 [Source:RGD Symbol;Acc:68396]	AGAGATTAGACACTAGAGGGGAAGAGCTGTCGGGGAACGGAACAAAGTGGTTTCCTTTTC
chr1	Insc	+	169080185	CDS	none	-0.309708	0.926211	1	N	Not Sig	ncbiRefSeq	INSC, spindle orientation adaptor protein [Source:RGD Symbol;Acc:1311379]	TCTTTCACCCAGCACCTCACTAGCTTTCTGGAGAACATGGAGGAGATTGTGACAGCCCTA
chr1	Insc	+	169100435	3UTR	AATAAA	-0.40672	0.739553	1	N	Not Sig	ncbiRefSeq	INSC, spindle orientation adaptor protein [Source:RGD Symbol;Acc:1311379]	TATGCAGTTGAAAAGACATACTGTAAGGAAATGTTTTTCTTTAATAAATGGAATCATGAA
chr1	Insyn2a	-	189697855	intron	AAGAAA	-1.08772	0.213054	1	N	Not Sig	ncbiRefSeq	inhibitory synaptic factor 2A [Source:RGD Symbol;Acc:2302685]	GATTCCCTTCCCCTCCCCAAACACAGAGGCAGTGAAAGAAACTTGGTAGCCACACAAAAC
chr1	Ints4	+	151853824	3UTR	AATAAA	0.136248	0.925284	1	N	Not Sig	ncbiRefSeq	integrator complex subunit 4 [Source:RGD Symbol;Acc:1305036]	ATTAAAACCAGAAATCTGCTGGTTTATTTCCTCTATCCCCATAATAAAGTTGAGAAAACA
chr1	Ints5	+	205793685	3UTR	AATAAA	-0.695175	0.562963	1	N	Not Sig	ncbiRefSeq	integrator complex subunit 5 [Source:RGD Symbol;Acc:1309370]	AGTGGTGTCACTTTTTTCAAACCCCACCATTTTTTCTAAATAAAATTTGCCGAGTTGACA
chr1	Ipcef1	-	43268932	intron	AAGAAA	-0.0243993	0.894066	1	N	Not Sig	ncbiRefSeq	interaction protein for cytohesin exchange factors 1 [Source:RGD Symbol;Acc:735159]	GGCTGGTTTGGGGTTGTTTCTTTTAGTCTTTAAGGAAGAAGAAATAATGTAAGGCAGAAA
chr1	Ipcef1	-	43282387	CDS	none	0.10398	1	1	N	Not Sig	ncbiRefSeq	interaction protein for cytohesin exchange factors 1 [Source:RGD Symbol;Acc:735159]	CACATCTCACCTTTAATGTGCTGTTCAAGGTTCTGATCTTGTGCAGCTTCTCGTTTATTG
chr1	Ipo7	+	164102483	3UTR	AATGAA	-0.108375	0.768237	1	N	Not Sig	ncbiRefSeq	importin 7 [Source:RGD Symbol;Acc:1310849]	AAAATTTATAATTGTACAAATGAAATGCACATATTGATATTTAAAATGCATAATTAAGAA
chr1	Ipo7	+	164102753	3UTR	AATAAA	0.00338646	0.877817	1	N	Not Sig	ncbiRefSeq	importin 7 [Source:RGD Symbol;Acc:1310849]	CTAGGTTGCTTAAGGTTCTATAAAAATCAAAACAATAAAAATGCGGTAGTTATTCATATT
chr1	Ipo7	+	164102936	3UTR	ATTACA	-1.59052	0.0589938	1	N	Not Sig	ncbiRefSeq	importin 7 [Source:RGD Symbol;Acc:1310849]	GAACACCATATCTAAAAAAGGATTTATACAGTGAAAATTCTCATTACATAGGTTATATAT
chr1	Iqck	+	173251336	intron	AATAAA	0.272318	0.611343	1	N	Not Sig	ncbiRefSeq	IQ motif containing K [Source:RGD Symbol;Acc:6502881]	TGGCTCAGCCATTAGAGGCTAAGCTCACAAAAAAAAAATAAGTAAATAAAATCTTGAACG
chr1	Iqck	+	173316990	3UTR	AATAAA	-0.0582006	0.758107	1	N	Not Sig	ncbiRefSeq	IQ motif containing K [Source:RGD Symbol;Acc:6502881]	TCTTGTTAAGAACAGCATTTTGAAAATAAAACCTATCTGCCCATGCTTAACAACCTTTAA
chr1	Iqgap1	-	134679580	unassigned	AATAAA	-0.102064	0.862266	1	N	Not Sig	ncbiRefSeq	IQ motif containing GTPase activating protein 1 [Source:RGD Symbol;Acc:1311884]	ACATCAAAGCCATCAGAGGCTCAGTAGCATGATTTACCTATCTTTTGGAATAAAGAGATT
chr1	Irf2bp1	+	78655267	3UTR	AATAAA	-0.0906318	0.936144	1	N	Not Sig	ncbiRefSeq	interferon regulatory factor 2 binding protein 1 [Source:RGD Symbol;Acc:1308312]	TGTTCCCTTCTCCCACCCTTTTTTTCCTTCAATAAACTGAGAGATGGGTTGTTTTTTTTC
chr1	Irf2bp1	+	78655436	3UTR	ATTAAA	-0.799721	0.64481	1	N	Not Sig	ncbiRefSeq	interferon regulatory factor 2 binding protein 1 [Source:RGD Symbol;Acc:1308312]	CAGTGGGCGGCTGTTTGTAGTAGTGTACATTTGCTGTGCTCTGATTAAAAGGTGTAGTCG
chr1	Irf3	+	95484923	3UTR	AATAAA	-0.0751636	1	1	N	Not Sig	ncbiRefSeq	interferon regulatory factor 3 [Source:RGD Symbol;Acc:1549774]	GCCACTGGAGAAACCTGAGCCCAGCTCAGCTGCTCCAATAAAGCAATTTATGCCACCATC
chr1	Irf7	-	196367379	unassigned	none	0.159673	1	1	N	Not Sig	ncbiRefSeq	interferon regulatory factor 7 [Source:RGD Symbol;Acc:1307828]	CTGAGCTAAATCCCCAGCCCCTCCCCATTCCTGTCTTAAAGCGTTTGTATCCAGTGAGAG
chr1	Irgq	+	80131880	3UTR	AATAAA	-0.40415	0.397251	1	N	Not Sig	ncbiRefSeq	immunity-related GTPase Q [Source:RGD Symbol;Acc:1309409]	GGAATCTGTCTGGTCAACCTGTGGTGTGTTTTGGAAAAAAGAATAAAAGGGTAGAAATAC
chr1	Isg20	+	132837026	3UTR	AATAAA	1.2739	0.733973	1	N	Not Sig	ncbiRefSeq	interferon stimulated exonuclease gene 20 [Source:RGD Symbol;Acc:1306407]	TTGGAGCAAAGAAAAAAAAAACCAAACTTTAGTAATAAATGACTTTGATTTTGTCTAATC
chr1	Isoc2b	+	68993757	3UTR	AATAAA	0.119333	0.89141	1	N	Not Sig	ncbiRefSeq	isochorismatase domain containing 2b [Source:RGD Symbol;Acc:1309062]	AGGAGGGGGAACGAATGTCACAACTGGGACCCAGTCTCGAAGAATAAACATTGATGTGAC
chr1	Itgal	+	181955734	3UTR	AATAAA	-0.0292	0.871513	1	N	Not Sig	ncbiRefSeq	integrin subunit alpha L [Source:RGD Symbol;Acc:631424]	TTAGGGCATGCGTTTTCTGTTGCTACAATAAAGCACCCCAAAGAAAACAACATACGTGGA
chr1	Itgam	+	182709494	3UTR	AATAAA	0.360256	0.765577	1	N	Not Sig	ncbiRefSeq	integrin subunit alpha M [Source:RGD Symbol;Acc:2926]	ATATTATTTCCAGCCATTTGCTATTGTGAACAATGCTGAATTAATAAATTGGGTATATCT
chr1	Itpkc	-	82500956	unassigned	TATAAA	-0.0845269	0.949629	1	N	Not Sig	ncbiRefSeq	inositol-trisphosphate 3-kinase C [Source:RGD Symbol;Acc:631336]	GAAGGTCCAGAGTATGAGTCTCAGATGCCACATACCCAGGTGCCCAAAAATATCCACAAC
chr1	Jak2	+	227054378	3UTR	none	-0.565395	0.682953	1	N	Not Sig	ncbiRefSeq	Janus kinase 2 [Source:RGD Symbol;Acc:2939]	GTAATGTAAATTTTGCAGTGTAAGAGATGCACAGGACACACATGTACAGTTTTTACCACG
chr1	Jakmip3	+	193881103	3UTR	AATAAA	0.0861244	0.912643	1	N	Not Sig	ncbiRefSeq	janus kinase and microtubule interacting protein 3 [Source:RGD Symbol;Acc:1307177]	CAGAGAATTTTTACTTATTTGTAAATTACTGTACAGTTTTAATAAAACTTGTTTTAAATC
chr1	Josd2	+	94964750	3UTR	AATAAA	0.179924	0.748637	1	N	Not Sig	ncbiRefSeq	Josephin domain containing 2 [Source:RGD Symbol;Acc:1307305]	CTGCCCCAGTGTCCCCGCTCCCCTGACCACTGCTGCCTCAATAAATCTGCTCTTTTGTTA
chr1	Kank1	+	223074514	3UTR	AATAAA	0.23962	0.649871	1	N	Not Sig	ncbiRefSeq	KN motif and ankyrin repeat domains 1 [Source:RGD Symbol;Acc:1307714]	ATGTTTGAAGTGCCTTAGACTCTTGCCATATTTTCAAAATAAAAATTTCATTAAGCTCTG
chr1	Kat5	-	202895750	unassigned	none	0.0471438	0.992137	1	N	Not Sig	ncbiRefSeq	lysine acetyltransferase 5 [Source:RGD Symbol;Acc:621061]	CACCTTACCACCCTGAAGCTGGCATTGCATGGCACCCAGTCTGGCAAGAACTCCTGATCG
chr1	Kat8	+	182536638	3UTR	AATAAA	-0.128448	0.83865	1	N	Not Sig	ncbiRefSeq	lysine acetyltransferase 8 [Source:RGD Symbol;Acc:1311512]	TTGTGTCATTTATTAATAAAGCAAATTCTGCTGGTGTGCTGGACTTCGGAGGCAGGAAGA
chr1	Katna1	+	2244132	3UTR	AATAAA	0.230122	0.828826	1	N	Not Sig	ncbiRefSeq	katanin catalytic subunit A1 [Source:RGD Symbol;Acc:1303062]	ATAATGGTGTGATATTTAAATTCTTTCTGGTGCTTAATAAAGACAATATTTTTAAACTGC
chr1	Katnip	+	180436765	3UTR	AATAAA	-0.0376973	0.987892	1	N	Not Sig	ncbiRefSeq	katanin interacting protein [Source:RGD Symbol;Acc:1595846]	TTAACTGTCAAACAAATGTTTATTTTTTCTTACAAAATCAATAAAAGATGTTATTAAGAA
chr1	Kcnc1	+	96944742	3UTR	AATAAA	-0.0554409	0.912212	1	N	Not Sig	ncbiRefSeq	potassium voltage-gated channel subfamily C member 1 [Source:RGD Symbol;Acc:2955]	AAAAACTGCATGCCCAATGTTATGCAAAGAGATTCGAGCATGAAATAAATTTTGTAACAT
chr1	Kcnc3	+	95095164	3UTR	AATAAA	0.411228	0.354527	1	N	Not Sig	ncbiRefSeq	potassium voltage-gated channel subfamily C member 3 [Source:RGD Symbol;Acc:621358]	TGCCCCTCCCCACCTGCCCTCCCACTCCCCAGCCCAATAAATGATTCCTTTTCATTTACA
chr1	Kcnip2	-	244641146	unassigned	GATAAA	-0.0107616	0.928285	1	N	Not Sig	ncbiRefSeq	potassium voltage-gated channel interacting protein 2 [Source:RGD Symbol;Acc:70887]	CGTTGGATTCCATGGCAATTGCATGGCGGCGGTGGGGGATAAAGAGGCAGAGCCAGCAGG
chr1	Kcnj11	-	96591047	unassigned	none	-0.42588	0.514768	1	N	Not Sig	ncbiRefSeq	potassium inwardly-rectifying channel, subfamily J, member 11 [Source:RGD Symbol;Acc:69247]	GTCTGAGCTTAGAGGGGCACCATGCGGGGAGTAAGACCAGACAGCGACACATCACCCAGA
chr1	Kcnj14	-	96293158	unassigned	AACAAG	-0.00523262	0.996742	1	N	Not Sig	ncbiRefSeq	potassium inwardly-rectifying channel, subfamily J, member 14 [Source:RGD Symbol;Acc:628872]	ATCTCTGCAAAGGGCTCTGATCAGCTTGGATCTTTCACATCTTACTACAGGAACAAGCAG
chr1	Kcnk4	-	204117940	intron	none	0.368634	0.85744	1	N	Not Sig	ncbiRefSeq	potassium two pore domain channel subfamily K member 4 [Source:RGD Symbol;Acc:621449]	CTAGTGGCCTGAAGGAGTTCTAAGGTGCGTCTAGGTTTGGGGAACTCGGGCATACTTCTT
chr1	Kcnk4	-	204118367	3UTR	none	0.0868662	0.915501	1	N	Not Sig	ncbiRefSeq	potassium two pore domain channel subfamily K member 4 [Source:RGD Symbol;Acc:621449]	CCCCACGGTGGCGCGAGAAAAGCCCTCGCACACCCACTTGGGTCCCAGGAGCACTCACTC
chr1	Kcnq1	+	198395480	intron	none	1.74888	0.317569	1	N	Not Sig	ncbiRefSeq	potassium voltage-gated channel subfamily Q member 1 [Source:RGD Symbol;Acc:621503]	GTATTTCTTATATACATTTCGAGTGTTATTCCCTTTCGCGGTTTCCGGGCAAACATCCCC
chr1	Kctd13	+	181552842	3UTR	AATAAA	0.228788	0.440455	1	N	Not Sig	ncbiRefSeq	potassium channel tetramerization domain containing 13 [Source:RGD Symbol;Acc:735189]	TTTATTATTTTAATTTTCTATTAAATTATTGGAATAAAGTTGAGCTGAAGGTCTGCTGCT
chr1	Kctd14	+	151766692	3UTR	AATAAA	-0.137684	0.829258	1	N	Not Sig	ncbiRefSeq	potassium channel tetramerization domain containing 14 [Source:RGD Symbol;Acc:1306430]	GAGTTCTTTGTGGCAGGATTCTGACATCAGTCATCAGATTAAATAAAGAACTCTTAACTG
chr1	Kctd15	-	87258657	unassigned	none	-0.752775	0.563879	1	N	Not Sig	ncbiRefSeq	potassium channel tetramerization domain containing 15 [Source:RGD Symbol;Acc:1583737]	CCCCCTCTGCCAGAACTGAAGGGTGGGAATCTGGCTGCAGCTTCTGCATAGGACGGAGCC
chr1	Kctd21	+	151667309	3UTR	AAGAAA	0.530286	0.379943	1	N	Not Sig	ncbiRefSeq	potassium channel tetramerization domain containing 21 [Source:RGD Symbol;Acc:1559529]	GACAAGCAGATCTGTGATCATATTCAAGTAAGTCAAGGAAGAAACCTCAGAAATCAACAC
chr1	Kctd21	+	151667617	3UTR	AATAAA	-0.530643	0.292592	1	N	Not Sig	ncbiRefSeq	potassium channel tetramerization domain containing 21 [Source:RGD Symbol;Acc:1559529]	AACAAAATAATGTACGTGAGACTAAACAATAAATGACAGTTACTTTTTGTCTGCTTCCAA
chr1	Kctd21	+	151669775	3UTR	AATAAA	-0.846381	0.459826	1	N	Not Sig	ncbiRefSeq	potassium channel tetramerization domain containing 21 [Source:RGD Symbol;Acc:1559529]	ATCAGAAGTCCACTGTAACTTTAACTGTAGCACAAGCAAAATAAACCAGTCACTAGCTCT
chr1	Kdelr1	+	96358142	3UTR	AATAAA	0.0108614	0.965627	1	N	Not Sig	ncbiRefSeq	KDEL endoplasmic reticulum protein retention receptor 1 [Source:RGD Symbol;Acc:1306764]	TGTTTTTGTACAGAATTTGATGGCTGACTCTTTGTTCTCTTGAAATAAACCAAGGAAAAC
chr1	Kdm2a	-	201612426	unassigned	none	-0.103959	0.865373	1	N	Not Sig	ncbiRefSeq	lysine demethylase 2A [Source:RGD Symbol;Acc:1309419]	AAACCTTCTGACATCCTCTTAGACATAGACATACACATACACCAAAGGAGAAAGGGGTTA
chr1	Kdm8	+	180028828	3UTR	AATAAA	0.051093	0.936431	1	N	Not Sig	ncbiRefSeq	lysine demethylase 8 [Source:RGD Symbol;Acc:1304823]	CTTGGTCCATATGTAATTTAAAATTTCTTCAATAACAATAAAATATATTTTCTTAAGTAA
chr1	Kiaa0408L	-	28615599	unassigned	ATTAAA	-0.433791	0.398989	1	N	Not Sig	ncbiRefSeq	Kiaa0408-like [Source:RGD Symbol;Acc:1307525]	AGCCAGTGTGGTCATAAAATTCATTACATTGTTTTATTAAAGACTCTAAGAATCTCAGGT
chr1	Kif22	-	181635346	unassigned	ACTAAA	0.360028	0.859415	1	N	Not Sig	ncbiRefSeq	kinesin family member 22 [Source:RGD Symbol;Acc:1311886]	CTGACCCCCAAGGTAGTTATAGGTTCTCCCTACAGCCCTGCCATCAAAAATCAGGCTCAA
chr1	Kif7	-	133640080	intron	none	0.7522	0.617229	1	N	Not Sig	ncbiRefSeq	kinesin family member 7 [Source:RGD Symbol;Acc:1310310]	ACTAACTCTGATAGGCTCCACTGCCTCTCAGCGGGGGACACGTTTAAGACGTAAGCCATA
chr1	Kirrel2	-	85708792	unassigned	none	0.623976	0.478092	1	N	Not Sig	ncbiRefSeq	kirre like nephrin family adhesion molecule 2 [Source:RGD Symbol;Acc:1308456]	TCCAACCTTTACAAGCCTCTTCATTCATGGAAAACACCAGGAGGCTCGAAGCACAGTTAC
chr1	Klc2	-	202414554	intron	AACAAG	0.000506462	0.942211	1	N	Not Sig	ncbiRefSeq	kinesin light chain 2 [Source:RGD Symbol;Acc:1307377]	TCCTGATTCCACCCGACTCTAGGGATGCTCAGGGGCTCTGAATTCCTCAAAACAAGCCCG
chr1	Klf9	+	220725029	3UTR	none	0.864094	0.0501535	1	N	Not Sig	ncbiRefSeq	KLF transcription factor 9 [Source:RGD Symbol;Acc:70934]	CATCAGTGGCCCACCACTACTTAGCTTGTATCTCGGTGTCTACACAATGGCCTGAACCAC
chr1	Klhl25	+	129750141	3UTR	AATAAA	0.0900798	0.820959	1	N	Not Sig	ncbiRefSeq	kelch-like family member 25 [Source:RGD Symbol;Acc:1310815]	TACTTTTATTAGTTTCTAACTTAATAAAAGTGAGGAAGTTCTTGCCCTCCTTTGGGTTCT
chr1	Klk11	+	94233279	3UTR	AATAAA	1.51639	0.599424	1	N	Not Sig	ncbiRefSeq	kallikrein related-peptidase 11 [Source:RGD Symbol;Acc:1308690]	GTTCCCAGCTTTGAAGACCGTCCCTGGCATATTCCAGTGTTTCAATAAATATTTGTTAAA
chr1	Klk6	+	94286136	3UTR	AATAAA	-0.190338	0.549445	1	N	Not Sig	ncbiRefSeq	kallikrein related-peptidase 6 [Source:RGD Symbol;Acc:3419]	CCTTCAGATGTCCAGCTCTGCCCCCTCATGCTTAATAAATGCAGTGACACAGAACACAGA
chr1	Klk8	+	94258645	3UTR	AATAAA	-0.0635892	1	1	N	Not Sig	ncbiRefSeq	kallikrein related-peptidase 8 [Source:RGD Symbol;Acc:1305998]	CCATGGGCAAGAGGGACTGATCCTGGGGATGGGCGGTCAATAAAGACCACTGCTGGCTCC
chr1	Kmt2b	-	85821699	unassigned	AATAAA	-0.36186	0.733887	1	N	Not Sig	ncbiRefSeq	lysine methyltransferase 2B [Source:RGD Symbol;Acc:7678027]	TAGCACATGCATACTAGTAAGCATGCGCAAACACAGCCACAATAAAATCATGAAGACCAC
chr1	Kmt5b	+	201049816	3UTR	AATAAA	-0.610644	0.140651	1	N	Not Sig	ncbiRefSeq	lysine methyltransferase 5B [Source:RGD Symbol;Acc:1311637]	TATTTTGTACATGCACTTGCAGTATTGAGGTTAATCATTTTAATAAATTCGGAAATTAAA
chr1	Kmt5c	-	69099530	unassigned	CATAAA	0.104052	0.967203	1	N	Not Sig	ncbiRefSeq	lysine methyltransferase 5C [Source:RGD Symbol;Acc:1305226]	GGCAGTCTCCCAGGCATGCCACCTCATGAGCCAAGCTGAGATCTCACCCTCCAACATAAA
chr1	Kndc1	+	194733777	CDS	none	-0.0457952	1	1	N	Not Sig	ncbiRefSeq	kinase non-catalytic C-lobe domain containing 1 [Source:RGD Symbol;Acc:1565261]	CTTTGCAACGGCCATGCAAATCCTGGGCGGGCTGGAACACCTGGCCGTGAGGCAGTCCCC
chr1	Kndc1	+	194738352	3UTR	AATAAA	-0.0676745	0.930866	1	N	Not Sig	ncbiRefSeq	kinase non-catalytic C-lobe domain containing 1 [Source:RGD Symbol;Acc:1565261]	TGTTTGCATGGCGCCCTGATGTCACAAGGTACAGATTTCTAAATAAAGTCATTTCTACCA
chr1	Knop1	-	173180399	unassigned	none	0.135772	0.835776	1	N	Not Sig	ncbiRefSeq	lysine-rich nucleolar protein 1 [Source:RGD Symbol;Acc:1565096]	GGGGAGCTGAGACAGGGTCGCTTGAAGCTAGTCCGGGCAAAACACACACATTCAAAAACT
chr1	Knop1	-	173183924	3UTR	AAGAAA	0.225897	1	1	N	Not Sig	ncbiRefSeq	lysine-rich nucleolar protein 1 [Source:RGD Symbol;Acc:1565096]	AATAACTGCAGATGACTAGTTCAAGCCAACTGCAAAACTGAGCAAGAAATGCAGCTTGAA
chr1	Kptn	+	76809529	3UTR	none	-0.0471077	1	1	N	Not Sig	ncbiRefSeq		CTCTTCCTTAGTCCCTGTGGATCCCACCAAGTCTATCCCAAGTGCTCTGAATCTACAGAA
chr1	L3mbtl3	+	19089245	3UTR	AATAAA	0.405851	0.684771	1	N	Not Sig	ncbiRefSeq	L3MBTL histone methyl-lysine binding protein 3 [Source:RGD Symbol;Acc:1305474]	TATTTGTACATTAACTTGCACTTGTTACATGTGATATGAATGAAATAAAATCTTAATTGC
chr1	Lama2	+	18320640	3UTR	ATTAAA	-0.307177	1	1	N	Not Sig	ncbiRefSeq	laminin subunit alpha 2 [Source:RGD Symbol;Acc:1308889]	TGAATTTTAACTCAAGTTCTCTTTCAAGCTTATGATTATTAAACCAATTATTTCATTCTA
chr1	Lamtor1	+	156277685	3UTR	GATAAA	0.0211709	0.940297	1	N	Not Sig	ncbiRefSeq	late endosomal/lysosomal adaptor, MAPK and MTOR activator 1 [Source:RGD Symbol;Acc:735078]	TACATGTTTGCTCTTTTTGTTTTTTGTTTGTCACCCCTCGATAAAGAAAGTATATTCATT
chr1	Lat	-	180936535	unassigned	AATAAA	-0.652633	0.570886	1	N	Not Sig	ncbiRefSeq	linker for activation of T cells [Source:RGD Symbol;Acc:620802]	GCCTGATCAACATAGCAAGACCCATCCCAGTTAAGCAAAATAAATAAATAAAACAAAAGG
chr1	Lats1	+	2193638	3UTR	AATAAA	0.115331	0.736252	1	N	Not Sig	ncbiRefSeq	large tumor suppressor kinase 1 [Source:RGD Symbol;Acc:1564085]	CAATCATTTCTTCTAGTGTAATATTTGCTGGGATAATAAAAAAGCAAACTTCAAATTTTT
chr1	Lcmt1	+	177960108	3UTR	AATAAA	-0.0489994	0.81702	1	N	Not Sig	ncbiRefSeq	leucine carboxyl methyltransferase 1 [Source:RGD Symbol;Acc:735118]	ACACCAGATCCTGTTCCTGTCAGTATCATTGTTTAAATAAATTTCACTTGCCATTTGTGT
chr1	Ldb1	-	244877150	intron	none	0.211959	0.756834	1	N	Not Sig	ncbiRefSeq	LIM domain binding 1 [Source:RGD Symbol;Acc:1310359]	CCATCTGTCAGAAGAAGGGAGGTGGCTGGATTTCCAACAGGGGAATAGGGAACATGAGTG
chr1	Ldha	+	97381065	3UTR	none	0.264842	0.996959	1	N	Not Sig	ncbiRefSeq	lactate dehydrogenase A [Source:RGD Symbol;Acc:2996]	ACGCACCCTCACCAAACATGCCTAGGCCATGAGTTCCCAGTTAGTTATAAGCTGGCTCCA
chr1	Ldha	+	97381247	exon	AATAAA	0.149676	0.646341	1	N	Not Sig	ncbiRefSeq	lactate dehydrogenase A [Source:RGD Symbol;Acc:2996]	GAACCAACCACTCAAGTGTCATGCCAAGGAAAACACCAAATAAACCTTGAACAGTGAGTG
chr1	Leng1	+	65555976	3UTR	TATAAA	0.118518	0.946736	1	N	Not Sig	ncbiRefSeq	leukocyte receptor cluster member 1 [Source:RGD Symbol;Acc:1307933]	GCTGCAGGTGCCAGCCGTCATATAAAACTATTTATTCATAAATATTTTCCAAAATGAAAA
chr1	Leng1	+	65556319	intron	none	0.879353	0.699607	1	N	Not Sig	ncbiRefSeq	leukocyte receptor cluster member 1 [Source:RGD Symbol;Acc:1307933]	TTCTTCCGCTGGCCCCACTTCTCGTAGTCAAAGTAGATGTAGGTGCCCTGGCCGGGGAAG
chr1	Leng1	+	65556915	intron	AATAAA	1.05129	0.333457	1	N	Not Sig	ncbiRefSeq	leukocyte receptor cluster member 1 [Source:RGD Symbol;Acc:1307933]	TATCTATGGGGAAAGCCACTGTGAAACACACCAACTGAAAGCAATAAAATTCATGACGCT
chr1	Leng8	-	70040784	CDS	none	0.262763	0.612742	1	N	Not Sig	ncbiRefSeq	leukocyte receptor cluster member 8 [Source:RGD Symbol;Acc:1306180]	AAAGTGTGTGGGATCCAGGTGCTTGGCCTGATGACAGAAGGGCCCCTCGCAAACCCCGGC
chr1	Leng8	-	70041359	3UTR	AAGAAA	-0.264644	0.487773	1	N	Not Sig	ncbiRefSeq	leukocyte receptor cluster member 8 [Source:RGD Symbol;Acc:1306180]	CTGCCCCTGGCTCAAATTCCCCTGAACTGACCAAGGTTTCAAATTTCAGAAAAGAAACAG
chr1	Leng9	+	70041559	3UTR	none	-0.0379384	0.923841	1	N	Not Sig	ncbiRefSeq	leukocyte receptor cluster member 9 [Source:RGD Symbol;Acc:6488215]	GTCCAGCTGTTTGCAACCTCATAGCACATCCTCCAGTTACATGGCAGAAGGGGGGGGGGG
chr1	Lgi4	+	86304876	3UTR	AATAAA	0.457089	0.293138	1	N	Not Sig	ncbiRefSeq	leucine-rich repeat LGI family, member 4 [Source:RGD Symbol;Acc:735035]	AGAATGTGACAGGGGCAAGAACAGGGAGTGTATGAATTCAATAAATGCCCCGCGCACCCA
chr1	Lgi4	+	86305909	intron	AATAAA	0.0870554	0.779362	1	N	Not Sig	ncbiRefSeq	leucine-rich repeat LGI family, member 4 [Source:RGD Symbol;Acc:735035]	GAGGGGTGGCCCATCTCCTGGACGGTGGCTAAGGAAATAAACGGAATAATATGTAAATAA
chr1	Lhpp	+	187462260	intron	AACAAG	0.58502	0.815511	1	N	Not Sig	ncbiRefSeq	phospholysine phosphohistidine inorganic pyrophosphate phosphatase [Source:RGD Symbol;Acc:1359187]	GATGAGAGGGACTTGAAAAACAAGGGGGCCGTGGAGAGCACTTCAACAGGGTAGCTTCCT
chr1	Lhpp	+	187468802	intron	AATAAA	0.30277	1	1	N	Not Sig	ncbiRefSeq	phospholysine phosphohistidine inorganic pyrophosphate phosphatase [Source:RGD Symbol;Acc:1359187]	TCCACACCACAGAGCCCTTTGGAATCTAAACAGAAATAAAATAGGTCTGTAACCTTTAAA
chr1	Lhpp	+	187494577	3UTR	AATAAA	-0.00736514	0.838968	1	N	Not Sig	ncbiRefSeq	phospholysine phosphohistidine inorganic pyrophosphate phosphatase [Source:RGD Symbol;Acc:1359187]	AATATGTTGTTTCCAGTGCACAGAGCGACCTAATGGCTCAATAAACTTGGCCTCAACAGT
chr1	Lig1	+	74204399	3UTR	AATAAA	0.292019	0.799126	1	N	Not Sig	ncbiRefSeq	DNA ligase 1 [Source:RGD Symbol;Acc:621424]	CAGGATGAGATCCTGGGGCTGGGATGCTTCATTTTATTCAATAAATGACTATCATTTGAC
chr1	Lin37	-	85809064	3UTR	AATAAA	-0.235779	0.707524	1	N	Not Sig	ncbiRefSeq	lin-37 DREAM MuvB core complex component [Source:RGD Symbol;Acc:1308901]	CTGAACATTTCCTGTCTCCCCAGGCCTTCCTGCCATTAGTTCCCAATAAATGCACTTGAG
chr1	Lins1	+	120293607	3UTR	AATAAA	-0.0634059	0.771193	1	N	Not Sig	ncbiRefSeq	lines homolog 1 [Source:RGD Symbol;Acc:1308792]	AGGTTTGTTTCTCTTTATATAAATTGCCTATCTAAGATAAATAAAAACAAAATCTGCAAA
chr1	Lipa	-	232024350	unassigned	AATATA	-0.16372	0.514662	1	N	Not Sig	ncbiRefSeq	lipase A, lysosomal acid type [Source:RGD Symbol;Acc:3008]	ATGTCCTGACAAAAGAAAAGAATATAGGCTAGCCATCGAAAAGCAAACACCAGCACACGG
chr1	Lipe	-	80965611	intron	none	-0.716313	0.775269	1	N	Not Sig	ncbiRefSeq	lipase E, hormone sensitive type [Source:RGD Symbol;Acc:3010]	TTTTCCCTTTCGCAGCAACTTGAGCCCAGTGCTGCCATCTGCTGGGAAAACACACTCCCT
chr1	Lipe	-	80970990	CDS	none	0.982258	0.898728	1	N	Not Sig	ncbiRefSeq	lipase E, hormone sensitive type [Source:RGD Symbol;Acc:3010]	GTCTCCACCTGTGAGCATGCTGGGCTTGCTTGTGGCTCTGAGCTCACCGATAGCACCTCA
chr1	Lipt2	+	154506120	3UTR	AATAAA	-0.155682	0.90355	1	N	Not Sig	ncbiRefSeq	lipoyl(octanoyl) transferase 2 [Source:RGD Symbol;Acc:1305211]	AAAAAAAAAAAAAAAAACAACCTGGATCTTCCTTCAATAAAGGGGAAAGCCTCTTCAAAA
chr1	Lix1	+	58176500	intron	none	0.347367	1	1	N	Not Sig	ncbiRefSeq	limb and CNS expressed 1 [Source:RGD Symbol;Acc:1309454]	GGAGGTCCTTGATCCACTTGGACTTGAGCTTTGTACAGGGGGATAGGAATGTATCGATTT
chr1	Lix1	+	58185966	3UTR	AATAAA	0.0474633	0.952175	1	N	Not Sig	ncbiRefSeq	limb and CNS expressed 1 [Source:RGD Symbol;Acc:1309454]	TCATGTATGTTTTCAACCATCCCCTTAGTGGTTCTACTTCAAAATAAAAGAAAGACAACA
chr1	Lix1	+	58186327	3UTR	AATAAA	-2.63463	0.146243	1	N	Not Sig	ncbiRefSeq	limb and CNS expressed 1 [Source:RGD Symbol;Acc:1309454]	CCCATCTTCTAATAATGTTTTAAATACTTAAGATTAAATAAATAGTACAGGTGATTTTTT
chr1	Lix1	+	58187553	3UTR	AATAAA	0.0427717	1	1	N	Not Sig	ncbiRefSeq	limb and CNS expressed 1 [Source:RGD Symbol;Acc:1309454]	CTAAACTTGGGCAACTTTATCAGAATATTACAGATTTAATAAAAATCATTATTCCTTCGA
chr1	Lmntd2	-	196315111	3UTR	AATATA	0.00466151	1	1	N	Not Sig	ncbiRefSeq	lamin tail domain containing 2 [Source:RGD Symbol;Acc:1307439]	TTTCTCTTGGGACACCATATAACCTTTGTAAAAGCCAAGCGAAACATTTTCAACTCTCAG
chr1	Lmo1	-	163132337	unassigned	AACAAG	0.0803198	0.869171	1	N	Not Sig	ncbiRefSeq	LIM domain only 1 [Source:RGD Symbol;Acc:621166]	ACCAGAGGCAGAAGGTGGGGAGGTGTGGTTCTGTGTCAGTAATGTGAACAATGCAGTCAT
chr1	Lmtk3	+	96280361	3UTR	none	-0.307884	0.994038	1	N	Not Sig	ncbiRefSeq	lemur tyrosine kinase 3 [Source:RGD Symbol;Acc:1588641]	GACACTGACACAGCCTCTGGGGAGGTGCCTGAGGCTGGGCCCTCCCTCTCCTCCACCATG
chr1	Lnpep	-	58258641	unassigned	AATATA	0.178173	0.611903	1	N	Not Sig	ncbiRefSeq	leucyl and cystinyl aminopeptidase [Source:RGD Symbol;Acc:621752]	AGAATCTGAGATGAAACGCTTCTAATATATAATCTGTCTAATAACATGAATCCATACAAT
chr1	LOC100125364	+	55951496	3UTR	ATTACA	0.320366	1	1	N	Not Sig	ncbiRefSeq	RIKEN cDNA 1600012H06 gene [Source:MGI Symbol;Acc:MGI:1915162]	TGCACGGATCGATTACAGTTTGCTGTGAACCTTGCTACTTGACCTGGTGAAATTCTGGTT
chr1	LOC100125364	+	55951632	3UTR	TATAAA	0.461377	0.955332	1	N	Not Sig	ncbiRefSeq	RIKEN cDNA 1600012H06 gene [Source:MGI Symbol;Acc:MGI:1915162]	CAGCAAGCACAATATTTTAGAAATTAAAATTCCTATAAAAAGGAATCTGCTCAATTTAAA
chr1	LOC100125364	+	55952259	3UTR	AATAAA	0.124279	1	1	N	Not Sig	ncbiRefSeq	RIKEN cDNA 1600012H06 gene [Source:MGI Symbol;Acc:MGI:1915162]	AAGGGTAGAAGTTGCTAATAAAGAAATAAATCAACTGGATGTTTAAGGTCTTAGTTAATT
chr1	LOC100125364	+	55952636	intron	AAGAAA	-0.207814	0.646523	1	N	Not Sig	ncbiRefSeq	RIKEN cDNA 1600012H06 gene [Source:MGI Symbol;Acc:MGI:1915162]	AGTCAAAGAAGAAAATGTAAACAACCCTTAATCAGTGTGAACTTTAGTGCATGGCCAAAA
chr1	LOC100125364	+	55953172	intron	AATAAA	-0.0495041	0.80933	1	N	Not Sig	ncbiRefSeq	RIKEN cDNA 1600012H06 gene [Source:MGI Symbol;Acc:MGI:1915162]	GACATAGCAGTCACTTTGTTAATAAATAATCTTTAAAAATAAAATCAAACCATTGAGACA
chr1	LOC100134871	-	158236971	unassigned	none	-0.181471	0.841555	1	N	Not Sig	ncbiRefSeq	beta globin minor gene [Source:RGD Symbol;Acc:2290038]	TTGTATCTTGAAACCTAAGCATGAACCCTTCTATGAGATACAATTAATTTAACACACCAT
chr1	LOC100302465	-	189059743	unassigned	AATAAA	-0.427952	0.606263	1	N	Not Sig	ncbiRefSeq	hypothetical LOC100302465 [Source:RGD Symbol;Acc:2311471]	GTCACTGTGGGGTTGTAGTGGGTATTGCCATTATCTATCAGAATAAAGGAGAGAGAAATG
chr1	LOC100359574	+	259716921	3UTR	none	0.462528	0.564933	1	N	Not Sig	ncbiRefSeq	NHP2 non-histone chromosome protein 2-like 1-like [Source:RGD Symbol;Acc:2323620]	ACTGTGAATGAGGAACTTTCTTTGGGTAGCAGTCCCTCCCACCCCTTATCATTTGAAAAA
chr1	LOC100360791	+	19108207	3UTR	AATAAA	0.899975	0.134873	1	N	Not Sig	ncbiRefSeq	tumor protein, translationally-controlled 1 [Source:RGD Symbol;Acc:2321467]	TTTTTTTAAGAAAAAAAAAAAACATGTCATGTGGGTTGTCTAAAAATAAAGTGCATTTAA
chr1	LOC100360843	+	76610603	3UTR	AATAAA	-0.211094	0.993495	1	N	Not Sig	ncbiRefSeq	ribosomal protein S19-like [Source:RGD Symbol;Acc:2321315]	GCCAACAAGAAGCATTAGAACAAAGGATGCTGGGTTAATAAATTGCCTCATTCATAAAAA
chr1	LOC100361060	+	180986203	3UTR	AATAAA	-0.0411293	0.954627	1	N	Not Sig	ncbiRefSeq	ribosomal protein L36-like [Source:RGD Symbol;Acc:2320900]	TGATGACCCCTCCCCCAATAAAAGATGGTTCTTAAAAAAAAAAAAAAAAAAAAAAAAAAA
chr1	LOC100361898	+	227988841	3UTR	ATTAAA	-0.586431	0.533757	1	N	Not Sig	ncbiRefSeq		CAACAGAGGAATGTCTGAATGAAGTACTCAATTAAAGAGAAACAATTTCTAAAAAAAAAA
chr1	LOC100361913	-	84549826	3UTR	AATAAA	0.440621	0.55079	1	N	Not Sig	ncbiRefSeq	rCG54286-like [Source:RGD Symbol;Acc:2319167]	CGCGCTCTCCCTCCCAGCCAAGGTGCTCTTGTAGCCAGCTGCACACCCGCAACAATAAAC
chr1	LOC100362069	+	83056902	3UTR	AATAAA	0.0221222	0.969089	1	N	Not Sig	ncbiRefSeq		GAGCTCCTGAGCCCCACACCCCAGAAGCAATAAAGAGTCCACTGATTTGTTCGACCACCT
chr1	LOC100362342	-	192184439	unassigned	AACAAG	-0.224648	0.663326	1	N	Not Sig	ncbiRefSeq		GGAAGCTTCCTGATCTGGGAAAAACAAGGTCAGTGAGTTACACAGTACACCAAAGCCAGA
chr1	LOC100362709	+	34723042	3UTR	AATAAA	-0.0162204	0.984782	1	N	Not Sig	ncbiRefSeq		GAAAAGCCATCTATGTACTGAGCAAAGGATTAGAAGGAAAATAAATGATTTATACTTTAT
chr1	LOC100364016	-	20099752	intron	none	-0.923013	0.596975	1	N	Not Sig	ncbiRefSeq		CTTTCCTAAGTGTGAAACTCTGTTCTATAGAGATTACTAATTCTTTTTTTTTTTTTTTAC
chr1	LOC100364427	+	76617067	3UTR	AATAAA	0.201961	0.77904	1	N	Not Sig	ncbiRefSeq	ribosomal protein S12-like [Source:RGD Symbol;Acc:2321033]	CGAGGAGTACTTCAAATGCAAGAAATGAATAAATAAAATTTTGGCTCATTAAAAAAAAAA
chr1	LOC100364457	-	76622574	unassigned	none	0.0516461	0.838287	1	N	Not Sig	ncbiRefSeq		GAGCAGTCAGTGCTCTTAACTGCTGAGCCATCTCTTTCTAGTCCCTGTATGGTACGGAAG
chr1	LOC100365062	+	73775984	3UTR	AATAAA	-0.152788	0.71829	1	N	Not Sig	ncbiRefSeq	eukaryotic translation initiation factor 3, subunit 6 48kDa-like [Source:RGD Symbol;Acc:2319808]	ATTAACATGTTTGCTAAAAATTTTGGAAATTTGAATAAAATTGGCTATGATTCATTTTTT
chr1	LOC100365363	+	60706241	3UTR	ATTAAA	-0.732485	0.212748	1	N	Not Sig	ncbiRefSeq	vomeronasal 1 receptor, F4-like [Source:RGD Symbol;Acc:2319215]	CTTGTTCAAAACATCACTAATCAAACTTTTAGCTAATGAAATTAAAGGTTTTATTTTCCA
chr1	LOC100909904	+	94977868	3UTR	AATAAA	1.57623	0.438713	1	N	Not Sig	ncbiRefSeq		GTTGGGGTGAGGGGAGCTGTGGAAAAATCTGTAGAAATAAACGTTTTTACTCCTAACACA
chr1	LOC100911093	-	170720729	unassigned	AATACA	-1.30903	0.453449	1	N	Not Sig	ncbiRefSeq	CCA tRNA nucleotidyltransferase 1, mitochondrial-like [Source:RGD Symbol;Acc:6494996]	ACGTGAATGCTTCAATTCACATAACAATTCACACAGGACCAAAATTGAGTGGGTCTCTGA
chr1	LOC100911196	-	68810663	unassigned	ATTAAA	0.56018	0.613803	1	N	Not Sig	ncbiRefSeq		CACCTAATTTCTTTAAATATTTTTTAAAAATTGAGATTAAAAAAAATCAAGATTAGCCAC
chr1	LOC100912336	-	207807375	unassigned	AATAAA	-0.107695	0.992027	1	N	Not Sig	ncbiRefSeq	membrane-spanning 4-domains subfamily A member 12-like [Source:RGD Symbol;Acc:6487805]	CAGATTAATTTATGATAATGCAATAAATTCATGGTAAATTTCCCACATGGAAAAACCAAC
chr1	LOC100912427	-	171304586	unassigned	ACTAAA	-0.308392	0.910628	1	N	Not Sig	ncbiRefSeq	nuclease-sensitive element-binding protein 1-like [Source:RGD Symbol;Acc:6486912]	GGTAGTTAGGTCTTACCATGAAATCAGGTGGGCCACATATGGCTGAATTCTCAGGACAAT
chr1	LOC100912659	+	93038481	3UTR	AATAAA	-0.401119	0.529871	1	N	Not Sig	ncbiRefSeq	zinc finger protein 709-like [Source:RGD Symbol;Acc:6485855]	GCAGCTTGCTATTTTTGTAACATGGTGATTTGGTTGAACACAATAAAGTACAGTAGTAAC
chr1	LOC100912787	-	85069431	unassigned	none	-0.25402	0.794398	1	N	Not Sig	ncbiRefSeq	zinc finger protein 850-like [Source:RGD Symbol;Acc:6485475]	ATCCCACCTTTTTGCCCCTGCCCCAAACTGTGCCCCAATGTCAGCAGGAAGTAGACACAG
chr1	LOC102546648	+	94005687	intron	AATAAA	0.181937	1	1	N	Not Sig	ncbiRefSeq		GAGTGTTGAAAGGCTTTTAACAGTGTGTCAGATTATAATAAATGCCAAGCACCTCATACC
chr1	LOC102547287	-	35052534	intron	GATAAA	-0.176079	0.854384	1	N	Not Sig	ncbiRefSeq	zinc finger protein 728-like [Source:RGD Symbol;Acc:7718701]	TCTCTTTGGCTTGCGGCCTTATTTTCCCTCTCGTGATGATAAAATACCCTGACACATGCA
chr1	LOC102547413	+	85053324	3UTR	AATAAA	-1.05136	0.223945	1	N	Not Sig	ncbiRefSeq		ACATTACCACTTGGAGAATTTTGTCATCTATCTTTACTGTAATAAAGCCATATTCACTCT
chr1	LOC102548231	+	91167626	3UTR	TATAAA	-0.826557	0.232957	1	N	Not Sig	ncbiRefSeq		TGTTCTATGTGATGTTCTCTGTATTTGCCAAGTATAAAACCAAAGTATTGGCTCTGAAAA
chr1	LOC102548320	+	91196398	3UTR	AATAAA	1.36029	0.0838711	1	N	Not Sig	ncbiRefSeq	zinc finger protein 845-like [Source:RGD Symbol;Acc:7683572]	ATCTGATTAGTGTGAAAATTTGCTTTCATCTTTAATAAATAGTAAAATTATGTTTACTCA
chr1	LOC102548320	+	91198291	3UTR	AATAAA	0.348272	0.611882	1	N	Not Sig	ncbiRefSeq	zinc finger protein 845-like [Source:RGD Symbol;Acc:7683572]	ACTGTCCAAAGTGATGGATTGTGATCTAGAAGTGCAAGATGAAATAAATCCTTTTCTTCT
chr1	LOC102548503	+	79827563	3UTR	AATAAA	-0.596786	0.411374	1	N	Not Sig	ncbiRefSeq		ATAGTGTTTTAGAAAGGATCTTCTTAGCGTACGAATAAAGAAAAGAATCAAAAAACGTAT
chr1	LOC102548695	-	79885874	intron	none	-0.274235	0.735726	1	N	Not Sig	ncbiRefSeq	zinc finger protein 45-like [Source:RGD Symbol;Acc:7529325]	GTGTTGTATGTTCTTTCATGTGTAGATTTAAGTGTAATGGAGTGTGGGGCGGCTGGTCTG
chr1	LOC102548728	+	61723295	3UTR	AATAAA	-0.753803	0.255906	1	N	Not Sig	ncbiRefSeq	zinc finger protein 845-like [Source:RGD Symbol;Acc:7537348]	TAGCAGAAAGACCATGAAATAAAACTCAGGAAAATATTAATAAAGACATATATTCAGCTT
chr1	LOC102548730	-	110158662	exon	AAGAAA	-0.113646	1	1	N	Not Sig	ncbiRefSeq		TACCTTGTACTGATCCCTGTGTCTCTTAGGTAGTAGGCAGATACTCATTAATCAAGAAAT
chr1	LOC102548730	-	110159517	intron	none	-0.714732	0.391775	1	N	Not Sig	ncbiRefSeq		GTGGTAACTAACATCTTGGAAAACATCCTGAGAGCAGTTCTCCCAGCATTTGCTTGTTAA
chr1	LOC102548730	-	110159789	intron	AATATA	1.1779	0.178591	1	N	Not Sig	ncbiRefSeq		TATATTCACAGATTTGTGAAATTGTCTTTATATAATTCCAGAGCATTTTCATCGCTGTAA
chr1	LOC102549471	+	156460607	intron	AATAAA	-0.22168	0.617537	1	N	Not Sig	ncbiRefSeq		GAGTAAATACTCCCCATACTAGCTTTTCCTACATGAGTCTACATAATAAAATGGTGAACA
chr1	LOC102549842	-	35075407	unassigned	none	-1.02368	0.159661	1	N	Not Sig	ncbiRefSeq	zinc finger protein 91-like [Source:RGD Symbol;Acc:7600894]	ACTTTACTATGGCTCTAAAACAGGAATTGTGTGTCATTAGACAAAAACTACAGTTCTCAC
chr1	LOC102550291	-	260248230	unassigned	none	0.555763	1	1	N	Not Sig	ncbiRefSeq	zinc finger protein 658-like [Source:RGD Symbol;Acc:7570552]	TACATTCATGAGGTTTTTCTCCTGTATGAATTCTTTTATGCCTTTGAAGATGACTGTTAC
chr1	LOC102550534	+	172861181	3UTR	AATAAA	0.0764388	0.868621	1	N	Not Sig	ncbiRefSeq		TCCTGTTGTGATCCTGCCACACTAATAAAGCTACTTTGCCCAGAAAAAAAAAAAAAGAAA
chr1	LOC102550851	+	61395333	3UTR	AATAAA	-0.107695	0.992027	1	N	Not Sig	ncbiRefSeq	zinc finger protein 420-like [Source:RGD Symbol;Acc:7563768]	TTTAGAAGTATAACAAAGTTTATATTAAAATAAAATTCTGTACATGTCACTGCAGGGAAA
chr1	LOC102551340	-	35165731	unassigned	none	-0.74809	0.364573	1	N	Not Sig	ncbiRefSeq	zinc finger protein 728-like [Source:RGD Symbol;Acc:7697243]	TTGTCTACCACGGTATCTTATGCAGTGTATCTTATTGCTATGAAGAAGCACCAAACCAGG
chr1	LOC102552527	+	61155126	3UTR	AATAAA	-0.147479	0.875635	1	N	Not Sig	ncbiRefSeq		TTATATCATAAAAGAGTATCATAGAGTTTATATTTAAATAAAATTCTGCAAATGTGTCTG
chr1	LOC102552731	-	94713612	unassigned	none	1.87452	0.401941	1	N	Not Sig	ncbiRefSeq	uncharacterized LOC102552731 [Source:RGD Symbol;Acc:7636386]	TCGAATCCAGCTAGGCCAGACCCTACACTGGAAGCAGAAGAGAGGACAAGCACTTGAACG
chr1	LOC102552823	+	58480393	3UTR	ATTAAA	0.637136	0.840594	1	N	Not Sig	ncbiRefSeq	zinc finger protein 709-like [Source:RGD Symbol;Acc:7716102]	TAATGGACTGAAACTCTGTATCTGCAACGCCTCCCCAATTAAATGTTGTGTTTTATAAGA
chr1	LOC102553046	-	202003100	5UTR	none	0.0700789	0.955097	1	N	Not Sig	ncbiRefSeq		TCCATCCCTGCCCCCAACCCCCTTAAGGCAGTGACTAGGCCAGAATTCTCCTGGTTGATA
chr1	LOC102553298	+	138541383	3UTR	AGTAAA	-1.45895	0.0928926	1	N	Not Sig	ncbiRefSeq		CCTCACAAGATACCATGGCTGTTTTTAGTGACTGAGAGTAAACTGGCTAGGCCATGGCTG
chr1	LOC102553298	+	138547105	3UTR	AATAAA	0.368206	0.377406	1	N	Not Sig	ncbiRefSeq		GCTATAAATATGTACAATCCATGTATTGATTTTAAAAAATAAATAAAATAGAAAAGAGGT
chr1	LOC102553760	-	83203849	unassigned	none	-1.3782	0.282584	1	N	Not Sig	ncbiRefSeq	zinc finger protein 59-like [Source:RGD Symbol;Acc:7588314]	GTTGTGTTGGTCAGCTACTCCTGGGCCCTGAGGTATGGTTGAAACACCCAGTGAGACAGC
chr1	LOC102553890	+	76580677	3UTR	AATAAA	0.0268906	1	1	N	Not Sig	ncbiRefSeq		GGTAAAATGAAACTATTGATTAATAAAAATTGATTTTTTTAAAAAATTTTGTGCATTAAA
chr1	LOC102553962	-	182003288	exon	none	-1.12859	0.217848	1	N	Not Sig	ncbiRefSeq		TTTTTCTTCAAGTGAAACTAGATATCTGGGAGAGAGGGGAGTGAGGTTCTTTGATTTTCA
chr1	LOC102554136	+	83082120	intron	AATAAA	-0.794186	0.0738963	1	N	Not Sig	ncbiRefSeq		ATGTGTTTGTACAATGTCAGTTATTGAATCGACAATAAATTTACAACCTTGTGTCATGCT
chr1	LOC102554136	+	83141461	3UTR	AATAAA	-0.0807189	0.985679	1	N	Not Sig	ncbiRefSeq		TGAATCCCAGAAACTTCGATGTATTCAGAGCTGGCTGGAATAAAGACCTGTAGTTGGTTA
chr1	LOC102554302	-	182039365	unassigned	AATAAG	1.49055	0.230686	1	N	Not Sig	ncbiRefSeq		TACAGGTGACCAGTCAATAAGTGAGCTGTCTTTAGTTATGATCCAGTGAGAACCAAGCTA
chr1	LOC102554302	-	182039923	3UTR	none	-1.09204	0.259151	1	N	Not Sig	ncbiRefSeq		CACTGAACCAACTCACATCTCTAGCCCAGACCCCATTTTTTTAAACACAAAACACTGGGG
chr1	LOC102554457	-	64916830	unassigned	AATAAA	-0.47682	0.165477	1	N	Not Sig	ncbiRefSeq		TACCAAGGACTAATCTATCAAAAAAACTGAAAATGAATAAATGAAGTCTTAATACATATT
chr1	LOC102555183	-	85409569	unassigned	AATAAA	-0.744358	0.0249168	0.838957	N	Not Sig	ncbiRefSeq		AGAACTATAAGAACGAGACCATATGCAACATAGTATAAAATAAAGTTGAAAGATTTAAGA
chr1	LOC102555377	+	62493726	intron	AATAAA	0.0964181	0.944297	1	N	Not Sig	ncbiRefSeq	zinc finger protein 182-like [Source:RGD Symbol;Acc:7744154]	ACCATTAACTCCTTGTCAATACTCCTGTGTGTACCTCCAATAAATCTCACTGATTCAACA
chr1	LOC102555644	-	62435502	unassigned	none	0.928905	0.372183	1	N	Not Sig	ncbiRefSeq	zinc finger protein 182-like [Source:RGD Symbol;Acc:7699783]	AACAGAGATGCAGCCCACATATTTATCTACCCATCCCAAGTTGAAGCTGAAAACACCCAA
chr1	LOC102555672	+	93197705	3UTR	AATATA	-0.717395	0.261306	1	N	Not Sig	ncbiRefSeq	zinc finger protein 850-like [Source:RGD Symbol;Acc:7701959]	TGAAAACTCATGTAGTGAAAATTTTGGAATTTTTTTAAAAAAAATATAAGAATATGTTTT
chr1	LOC102556805	-	38625890	unassigned	none	0.334857	0.916924	1	N	Not Sig	ncbiRefSeq	rho GTPase-activating protein 20-like [Source:RGD Symbol;Acc:7734973]	TAACTGCATAGACCTGGCCCAGGAGGCTTCAGGGAGAATATTTCAGTGTGTGGCCTGGAG
chr1	LOC102556805	-	38645084	intron	CATAAA	-0.0834275	0.827081	1	N	Not Sig	ncbiRefSeq	rho GTPase-activating protein 20-like [Source:RGD Symbol;Acc:7734973]	ACTCTAAACTATATTTCACCTTATAAGCACAGTTATTTCTCATAAAAACCCACCACATAT
chr1	LOC102556967	+	94022750	3UTR	ATTACA	-0.82654	0.458924	1	N	Not Sig	ncbiRefSeq	zinc finger protein 484-like [Source:RGD Symbol;Acc:7510716]	ATATTACATCAATGGTTTTTTGTTTAATGCGGGAGGTTTTTTGTTTTTGTTTTGTTTTTG
chr1	LOC102556967	+	94022941	3UTR	ATTAAA	-0.329372	0.750033	1	N	Not Sig	ncbiRefSeq	zinc finger protein 484-like [Source:RGD Symbol;Acc:7510716]	TAGGATTAAAGATGTGTACCAGTATGCCTGTCTGGATAATAATATTTTTATTTTTATTTT
chr1	LOC102557108	-	207751597	unassigned	AATAGA	-1.49624	0.433033	1	N	Not Sig	ncbiRefSeq	uncharacterized LOC102557108 [Source:RGD Symbol;Acc:7639871]	TTTATGAGAGTTGCTGAGGACATGGTGTCTCCTCACAGCAATAGAACACTGACTAAGCCA
chr1	LOC103689966	+	84921258	3UTR	AATAAA	0.0217974	0.801973	1	N	Not Sig	ncbiRefSeq	MARCKS-related protein-like [Source:RGD Symbol;Acc:9082300]	CTAAAACCATTCTTCCACCTGGATTTACTGTAACATTTGGAAAAGGAATAAATGTTGTCC
chr1	LOC103690163	+	85106028	3UTR	AATAAA	-0.444725	0.442901	1	N	Not Sig	ncbiRefSeq		CAGTGTACACATATATAATAAATAAATAAATTTTTATAAAAGGAGAGGATCATTTAAAAA
chr1	LOC103690163	+	85143682	3UTR	AATAAA	-0.0895555	0.746575	1	N	Not Sig	ncbiRefSeq		AGATCTGTTCCTAGCATACAGCATGGGTTTAATAAAATATTTCTCTGTTGTCATTTGTAT
chr1	LOC103691005	+	61235545	3UTR	AATAAA	0.0118823	1	1	N	Not Sig	ncbiRefSeq		ATGAACTTTTATATTTTTTAAAATAATGCTAAAATAAAAATTTGCCTATTGTGTCAAAAG
chr1	LOC103691165	-	129641306	intron	none	-0.0584592	0.919746	1	N	Not Sig	ncbiRefSeq	uncharacterized LOC103691165 [Source:RGD Symbol;Acc:9322177]	AAGGCTTGGATTTCAGGTAGAGAATGGATTCGGCGTGACAGACAGACACAAACTCGAGGT
chr1	LOC103691235	-	181407344	intron	none	-0.158947	0.634333	1	N	Not Sig	ncbiRefSeq	uncharacterized LOC103691235 [Source:RGD Symbol;Acc:9213265]	CCTAGGGGGGTAAGAAGAGGAAGCTTAGGTTTGCTTGGAGAGGAGGAGGTGCCAATGTTC
chr1	LOC103691238	-	182816656	intron	none	-0.85178	0.348967	1	N	Not Sig	ncbiRefSeq	zinc finger protein 239-like [Source:RGD Symbol;Acc:9074604]	CAGGTATGGGTATAACACTCACTCAATGCAACAGAGTCAAAGGCCAAACAGTAAGCAGAA
chr1	LOC103691253	+	187920157	3UTR	AATAAA	-2.01396	0.0792402	1	N	Not Sig	ncbiRefSeq		TCAGACCCCTGCATGAGTACCACATATCACACAACAATAAAATACTACCCTCTTTCTTAT
chr1	LOC103691288	-	205470558	intron	none	0.418644	0.714714	1	N	Not Sig	ncbiRefSeq		TCTTCTGACCTCCCTGAGCACTGGGCATGCACATACATACAGACAAAACATTCCACGCAC
chr1	LOC103691392	-	258564626	intron	AATAAG	-0.0889275	0.946716	1	N	Not Sig	ncbiRefSeq		GGCATCACCCACAATAAGCTGGGCCCTTCCCCTTGATCACTAGTTGAGAAAATGCCTTAC
chr1	LOC103691392	-	258569636	intron	none	0.248799	0.662585	1	N	Not Sig	ncbiRefSeq		GGGGTGCCTCCTGGGTCAGTTGCTTTTCTATTGCTGTGGTAAAATGTCATGATCAAGAGC
chr1	LOC103691392	-	258598737	intron	none	-2.23206	0.113934	1	N	Not Sig	ncbiRefSeq		AAGCCAATATTCTGCTATTGGCCTTCAGATGAAGATGTTGAACTCTGAGCTTCTCCTGCA
chr1	LOC108348090	+	91108313	intron	AAGAAA	0.688942	1	1	N	Not Sig	ncbiRefSeq	zinc finger protein OZF-like [Source:RGD Symbol;Acc:11436011]	TTGATCCAGCAGCCTCAGCACACGAGGGGTCGGAGGAGTCACGCACGTAAGAAAAGTGGT
chr1	LOC108348090	+	91111883	intron	ATTAAA	-0.0986946	0.795471	1	N	Not Sig	ncbiRefSeq	zinc finger protein OZF-like [Source:RGD Symbol;Acc:11436011]	ACCAGAGTTTTGTAGATGAAACTAATCTATTAAAGGCCATACATACATATTGTTAAATGT
chr1	LOC108348989	+	79816527	3UTR	ATTAAA	-0.107585	0.824219	1	N	Not Sig	ncbiRefSeq	high mobility group protein B1 pseudogene [Source:RGD Symbol;Acc:11444414]	TGTTTTGTTGACATTCTGAATGCTTCTAAGTAAATACAATTTTTTTTATTAAAAAAAAAA
chr1	LOC108349446	-	134302903	unassigned	none	-0.0464038	1	1	N	Not Sig	ncbiRefSeq	60S ribosomal protein L35a pseudogene [Source:RGD Symbol;Acc:11501622]	GGCCACCATCTCTAATCTTCAACTGTATCACAATGTACAGGCTAAGAAGCCCTTCTTGGG
chr1	LOC108349526	-	56643277	unassigned	AATACA	0.849312	0.691898	1	N	Not Sig	ncbiRefSeq		CCTCTGTGAAACATTTCCTACATGCATGCTCACATAACTGTCCAACACAAACACACACAT
chr1	LOC108349548	+	77292501	3UTR	AATAAA	0.0543719	0.902988	1	N	Not Sig	ncbiRefSeq		ACAAGGTTTAACTGTTTTATATACACTGGCTGTAGCATACAATAAAGCAGCATACAAACA
chr1	LOC108349570	-	94915679	unassigned	AATACA	0.289981	0.642246	1	N	Not Sig	ncbiRefSeq		GGGACCTTCCTCATTTCTGACCAAACACCTGGCAAAAAACAATACACAAACAAACAAAAC
chr1	LOC108349682	-	201440416	intron	none	0.154936	0.704306	1	N	Not Sig	ncbiRefSeq		GTTCTTCTGGGGACTTGCTTTGCCCATTTGTTTTTGTTTTGTTTTTTTTTTTTACAAGAG
chr1	LOC108349848	-	121497669	unassigned	none	-0.124646	0.886427	1	N	Not Sig	ncbiRefSeq	thymosin beta-10 pseudogene [Source:RGD Symbol;Acc:11489695]	TTGATGTTCTTGTGACATGGTCTTATGTAGCCCAGGCTGGCCTCAAACTCTTTATGATTT
chr1	LOC120093053	-	204167723	unassigned	AAGAAA	0.00268679	0.990823	1	N	Not Sig	ncbiRefSeq		GCCCTACTCCCAACACTGAAGCTAAATCTCTTAGGATCCACAAAGAAACACAGACTCACT
chr1	LOC120093053	-	204168250	intron	none	0.230246	1	1	N	Not Sig	ncbiRefSeq		CAGTGATGCCTCTGTAGCTTTAACTCTTCTTAGGCATGTCTCAGCCCCCTCCCCAGGACC
chr1	LOC120093053	-	204168434	intron	none	1.48403	0.00673171	0.354353	N	Not Sig	ncbiRefSeq		AGCCTTTCTTCCCACAGCGTACTTCCTGGATCACTGCAACATGTGCCCCAGACTAGACTC
chr1	LOC120093065	-	158243695	unassigned	none	0.0628522	0.756238	1	N	Not Sig	ncbiRefSeq		CTTTGTATCTTGAAACCTAAGCATGAACCCTTCTATGAGATACAATTAATTTAACACACC
chr1	LOC120093131	+	85543780	3UTR	AATAAA	-0.453598	0.493114	1	N	Not Sig	ncbiRefSeq		GTGTCTGAAGACAGCTACACTGTACTCATAGACATAAAATAAATAAAATCTTTAAAAAAA
chr1	LOC120097335	+	117224157	3UTR	AATAAA	0.0207772	0.947353	1	N	Not Sig	ncbiRefSeq	high mobility group nucleosome-binding domain-containing protein 5-like [Source:RGD Symbol;Acc:41304028]	TGACTATATGTGTATGCACAAAGTTTTGCTGGATTTATCATAATAAAACAGTTCCACAAA
chr1	LOC120097610	+	240958094	3UTR	AATAAA	2.61494	0.032973	0.992217	N	Not Sig	ncbiRefSeq		ATCCAGTAGTGTATTCAAGGTTACCCCAGTATGCTTTTTCGGAATAAAGTTTGTTTTGTC
chr1	LOC120099120	+	47723780	3UTR	none	-0.472673	0.925999	1	N	Not Sig	ncbiRefSeq		TTGCTGTACTTTAGTGTGAGACACCCAAGGCTAAGACGTTGAGACACTGCACTTGACACT
chr1	LOC120099865	+	133429122	3UTR	AATAAA	0.0414786	0.89676	1	N	Not Sig	ncbiRefSeq		TACCTAAGTACCGTTTACAATGTGGCATTAATAAATGTGTCTGAGAAGCACCACTCCCTG
chr1	LOC120099911	-	168472018	unassigned	AACAAG	0.194499	0.881796	1	N	Not Sig	ncbiRefSeq		TTTCCTTTAAATAATTAACATCTTCTTTCCCAAAATATGAAAACAAGACAGAGAGGTCAG
chr1	LOC120099911	-	168472181	3UTR	none	-0.00657822	0.965606	1	N	Not Sig	ncbiRefSeq		AACACTGCTTCTTGGTCCTCAGGATCCCTAAGGAAGTCGTCTCAGAGGTTCTGATGGAGC
chr1	LOC120099911	-	168472364	3UTR	none	0.449966	0.91737	1	N	Not Sig	ncbiRefSeq		TCCATGTTCCCATCTACACAGCTTGCTTAAGTTCAGCTGACGTATTCATCCTGAGTGGAC
chr1	LOC308990	+	181705126	3UTR	AATAAA	-0.150301	1	1	N	Not Sig	ncbiRefSeq		TTACTTTATATTTTTTCCTTAAATTGATTTGCTGTTTGCTTAATAAATTTGTTTTAAAGT
chr1	LOC499235	-	161678310	intron	AATAGA	-0.146621	0.880944	1	N	Not Sig	ncbiRefSeq		GTCCATATGTAATTCTAATAGATCTGCCCTTATATGTTACTTTGTCTTTTTCCCTTGCAG
chr1	LOC499240	-	163742986	3UTR	none	-1.1301	0.350244	1	N	Not Sig	ncbiRefSeq		AGTTTTAGAAGTCCCCCATGCTGTGTGCCCAAAAACAGTAACGTAATGGTGCTGTCTGAA
chr1	LOC499331	+	216132896	3UTR	AATAAA	0.671867	0.196757	1	N	Not Sig	ncbiRefSeq		TAAGTTATTGTGTTACAATTTATTTTTTAATAAAGTACACTGTTTATGTTTGAGCTATGT
chr1	LOC679739	+	29977420	3UTR	AATAAA	0.12691	0.660778	1	N	Not Sig	ncbiRefSeq		GTGAGGTCACTGCTCTGTGAATGGTGTCCCTTGTTATGAATAAAGGATGCTCCCACCATG
chr1	LOC680200	-	34866933	exon	none	-0.0672204	1	1	N	Not Sig	ncbiRefSeq		CGTCCGGGACAGGACCAACGCAGAACTTCCAAGCCCCACGGACACCCGCACGCACTGTCC
chr1	LOC681458	+	243114450	3UTR	none	-0.599866	0.626939	1	N	Not Sig	ncbiRefSeq	similar to stearoyl-coenzyme A desaturase 3 [Source:RGD Symbol;Acc:1595370]	ACGTTGATTATGGAGGAAGGTCAGCTGTGTGCTTTTTCTGCCTCTTTGAGTTAGCCAACT
chr1	LOC682870	-	35020476	unassigned	AATAAT	-0.964667	0.138976	1	N	Not Sig	ncbiRefSeq		TGCCTCCGATGCTTCCCTACAATAATTTGTTGGTGTCATGAGTGGTATGACCAAAAACAA
chr1	LOC684270	-	68940176	unassigned	none	0.182193	0.774961	1	N	Not Sig	ncbiRefSeq		CAAAGACCCATCTCCTTCTCTACCTGCACGCTCTAGTAGCACCCCGCAAACCCCAACAAT
chr1	LOC684792	+	68937112	3UTR	AATAAA	-0.0464038	1	1	N	Not Sig	ncbiRefSeq	predicted gene, 36210 [Source:MGI Symbol;Acc:MGI:5595369]	GAACCCCATAAACATGTAAAATAAACCCTGGAAAAATAAACCAAGCTGGGGTTCCCACTG
chr1	LOC685933	+	236685858	3UTR	AATAAA	-0.0605836	0.887764	1	N	Not Sig	ncbiRefSeq		AAAAAAATTAACTAAAATCCATTAGTAACAATTACTATGAAAAATAAAACTTGTACACAG
chr1	LOC687508	+	85444860	exon	none	0.00935577	0.816512	1	N	Not Sig	ncbiRefSeq		AGGGCCCTTGGGACATGGAAGCAATAGGAGTGCTAGGCTTGGCACACAGACAGGATGGAG
chr1	LOC687508	+	85447530	intron	none	2.10921	0.273015	1	N	Not Sig	ncbiRefSeq		TGGCTCAGTGGTTAAGAGCACTGACTGCTCTTCCTGAGGTCCTGAGTTCAAATCCCAGCA
chr1	LOC687679	-	87982658	unassigned	none	0.244895	0.468218	1	N	Not Sig	ncbiRefSeq	similar to small nuclear ribonucleoprotein polypeptide G [Source:RGD Symbol;Acc:1583028]	GCTCTGGAACCATGCGCCTCAGTAACCTTTGTTTTTTTTTTTTTTTTATATTTTTTTTTT
chr1	LOC688778	+	201196070	CDS	none	0.335015	0.769439	1	N	Not Sig	ncbiRefSeq		GATGAGGCGATTGAGTTCATCAACCGGAGGGAGAAGCCACTTGCGCTGTATGCCTATTCC
chr1	LOC688778	+	201200642	intron	AATAAT	0.257061	0.73022	1	N	Not Sig	ncbiRefSeq		GGCTTTGTCCCACCTGAAGTGACATGATCATGAACCCAGATCAGAATAATTGGTGGAATC
chr1	LOC688778	+	201201666	intron	AACAAA	0.985254	0.72092	1	N	Not Sig	ncbiRefSeq		CTTCCTTCCTGGGCCCACATGGGCATTTAGCTCTGAAACTAACAAAGATTCATGGAGCAG
chr1	LOC689065	-	201784008	unassigned	GATAAA	1.92979	0.103564	1	N	Not Sig	ncbiRefSeq	RIKEN cDNA 2010003K11 gene [Source:MGI Symbol;Acc:MGI:1917111]	CTGTCTCACAGGAGTTGGGAGAGGCTTGGAACTTGTATATTAGTCACGAGGCAAATAGTT
chr1	LOC690000	+	90886227	3UTR	AATAAA	-0.243012	0.545131	1	N	Not Sig	ncbiRefSeq	similar to CG3740-PA [Source:RGD Symbol;Acc:1585208]	CCTGGTACCGTGGCTTTTATTGTGCTAGACACTCAATAAATATATATTTTTAAAGCTCTG
chr1	LOC690000	+	90887204	3UTR	AATAAA	-0.371517	0.278954	1	N	Not Sig	ncbiRefSeq	similar to CG3740-PA [Source:RGD Symbol;Acc:1585208]	ACCTTTTCAAAACTACAACCTGACTATCGTCCAATTACTAATAAATTACTTTTCCTTGAA
chr1	LOC691135	+	66649422	intron	none	-0.631366	0.825474	1	N	Not Sig	ncbiRefSeq	similar to zinc finger protein 418 [Source:RGD Symbol;Acc:1587451]	ATATGAACAGTGCGTAAAGTCTTATACCCAAAAAGCCACCCTTATAAGACACCAGCGAGT
chr1	LOC691143	-	97198684	unassigned	none	-1.02946	0.374163	1	N	Not Sig	ncbiRefSeq		GCAATGCCTTCAGCAACCAACTCATCTCCAGACTGAAGAGTGAGTTCTTATACCCCCAAT
chr1	LOC691143	-	97200139	3UTR	none	1.03893	0.563038	1	N	Not Sig	ncbiRefSeq		GGGCAGACTACGAAACCACGGTCTGTACAATGTTCATTTAAACCATCATCCGGACGCCAA
chr1	LOC691143	-	97206497	CDS	none	0.264436	0.887626	1	N	Not Sig	ncbiRefSeq		CGTGGTGACACCTCACTTGCCTTCCTCTATCTTCAGGTGCTCCTGTTCGGCCCGTGAGGC
chr1	LOC691722	+	73049932	3UTR	AATAAA	0.688942	1	1	N	Not Sig	ncbiRefSeq		GGTCTTCCTGAATGTGATAGCAAAATATTTTCATTAAATAAAACTTTCTAAGTGATGTTT
chr1	Lpcat1	-	29766069	unassigned	none	-0.344034	0.889774	1	N	Not Sig	ncbiRefSeq	lysophosphatidylcholine acyltransferase 1 [Source:RGD Symbol;Acc:1311599]	CTAAAAACATCTGTTGTCTCTCTACTACATGAGGCACTTAACGAAAACACACTCGAGCCT
chr1	Lpxn	+	209963085	3UTR	AATAAA	-0.00722175	1	1	N	Not Sig	ncbiRefSeq	leupaxin [Source:RGD Symbol;Acc:1304981]	TATGTGGAAGTGTATTTTAACTGACACGTGTGATGAATAAAGCAGCTTGTGGTTTTGGTG
chr1	Lrfn1	+	83761448	3UTR	ATTAAA	-0.520721	0.60571	1	N	Not Sig	ncbiRefSeq	leucine rich repeat and fibronectin type III domain containing 1 [Source:RGD Symbol;Acc:1304707]	AAATCCCACTCCGGAGCCGGGACCCTCCGCCGCAGCAGAATTAAACTTTTTTCTGTGTCT
chr1	Lrfn3	-	85616861	unassigned	none	-0.426358	0.822267	1	N	Not Sig	ncbiRefSeq	leucine rich repeat and fibronectin type III domain containing 3 [Source:RGD Symbol;Acc:1305567]	CCCTCCCCTCTGCAGCACCACTCAGTCCCCACAGACAGAGACAAGGGCAAGGGCACAGCC
chr1	Lrfn4	-	201888568	intron	none	-0.381657	0.950027	1	N	Not Sig	ncbiRefSeq	leucine rich repeat and fibronectin type III domain containing 4 [Source:RGD Symbol;Acc:1585286]	ACAGCCTCCCTTCCTCCCTCCCAGGGATCAAGCAGGATGAGATCAAAGACCAACACTGGC
chr1	Lrp11	+	2108114	3UTR	AATAAA	0.0101572	0.900312	1	N	Not Sig	ncbiRefSeq	LDL receptor related protein 11 [Source:RGD Symbol;Acc:1308602]	AAAAGATGCCTTGTATGTTCCAGTCCTTTAATAAACTATTTTATTCTTATGCCTTTAAAA
chr1	Lrp3	-	87844866	intron	none	-0.285966	0.700151	1	N	Not Sig	ncbiRefSeq	LDL receptor related protein 3 [Source:RGD Symbol;Acc:619729]	TGCCCATCACGGACAAGCCCTTGAAGACACAATGAGACCTAGTAGAGACTGGAACAGCTG
chr1	Lrp5	-	200814246	unassigned	CATAAA	0.254496	0.891896	1	N	Not Sig	ncbiRefSeq	LDL receptor related protein 5 [Source:RGD Symbol;Acc:1309329]	AATCTGTCTTTGGGAACAGGCTCAATACTCAAATACTCACGAGGCACAAAAGAATGGCAG
chr1	Lrrc10b	-	207096470	unassigned	none	-0.293273	0.756931	1	N	Not Sig	ncbiRefSeq	leucine rich repeat containing 10B [Source:RGD Symbol;Acc:1564983]	AGTCTGTCCCAAAGGTAATGACTCTAGCAAGAGCTAGGGAAAGCCTAGGCGATCCAAACC
chr1	Lrrc14b	+	28925645	3UTR	none	-0.313578	0.69664	1	N	Not Sig	ncbiRefSeq	leucine rich repeat containing 14B [Source:RGD Symbol;Acc:1564978]	ACTCCATTCGTAGTTCTGCATGTGACCCACCTGCTCAGGTACCTCCCCATTTCAGGACCT
chr1	Lrrc27	+	194021583	intron	AATAAA	-0.0469439	0.957515	1	N	Not Sig	ncbiRefSeq	leucine rich repeat containing 27 [Source:RGD Symbol;Acc:1559981]	GAAACCTCCCACTCCTCCCCTCTGAAACCTGCCTATAAATAAACCTCCTGAGGCCACAGT
chr1	Lrrc27	+	194035087	3UTR	ATTAAA	-0.111211	0.992991	1	N	Not Sig	ncbiRefSeq	leucine rich repeat containing 27 [Source:RGD Symbol;Acc:1559981]	CTTTCTGAGGCTATACAAGGTTTAGCTGCATTAAAAGGAAGAATCCTGTAAGCAAGCCAA
chr1	Lrrc28	-	121127732	intron	none	0.185195	0.860007	1	N	Not Sig	ncbiRefSeq	leucine rich repeat containing 28 [Source:RGD Symbol;Acc:1307209]	GAGGTCGTGTGCCCAGGCCTGCTGGTGTTCAGTACGCTGCAGTAACAGGAGGAGAGACAC
chr1	Lrrc28	-	121129152	3UTR	CATAAA	0.133705	1	1	N	Not Sig	ncbiRefSeq	leucine rich repeat containing 28 [Source:RGD Symbol;Acc:1307209]	TCATCTGGCTAAGTTTATATATGAGACACTCTCACATAAAAAGAAAGACACAGAAGACAA
chr1	Lrrc32	+	152798539	exon	none	1.92939	0.202347	1	N	Not Sig	ncbiRefSeq	leucine rich repeat containing 32 [Source:RGD Symbol;Acc:1309087]	AGGGGGTGGGGGGGAAGGGAGAATGAGGCTCTTGGCCTCTGTGCCCTACCCCAACTCTAA
chr1	Lrrc4b	+	94956309	3UTR	AGTAAA	-0.07774	1	1	N	Not Sig	ncbiRefSeq	leucine rich repeat containing 4B [Source:RGD Symbol;Acc:1307121]	CTCTGTAATTACTTTAAAAAAAAAAAAAAAAACACGGAAAAAGTAAAAAAAAAAAAAAAA
chr1	Lrrc51	-	156278616	unassigned	none	-0.480083	0.682281	1	N	Not Sig	ncbiRefSeq	leucine rich repeat containing 51 [Source:RGD Symbol;Acc:1565856]	CTGAAGTTTTACTAGTAGCGGCTGGGTGTGGAGAGCATCTTAACCAAGCACAGGTGATGT
chr1	Lrrc56	+	196315170	3UTR	AATAAA	0.153287	0.938091	1	N	Not Sig	ncbiRefSeq	leucine rich repeat containing 56 [Source:RGD Symbol;Acc:1311654]	GGTATGCAGAAATGTGCTTTACTTTATAAGCAATGGTTGGTTCAATAAATTATGAAGCTG
chr1	Lrrk1	-	119844359	unassigned	none	-0.214274	0.79694	1	N	Not Sig	ncbiRefSeq	leucine-rich repeat kinase 1 [Source:RGD Symbol;Acc:1308000]	CAGCAAGGGGACCTGGGAAGGCTAGAGTCTATGCGTTTCACTCAAGAGACAAAGGCCATG
chr1	Lrtomt	-	156266654	unassigned	AAGAAA	0.688942	0.998887	1	N	Not Sig	ncbiRefSeq	leucine rich transmembrane and O-methyltransferase domain containing [Source:RGD Symbol;Acc:1561509]	TGGAGGGGGGGCGAAGTTGAAAAGAAAGCCTCCCCAGCCTGAGCCCAGCATGTGTTGGAT
chr1	Lsm14a	-	86964799	intron	AACAAA	-0.0616226	0.840258	1	N	Not Sig	ncbiRefSeq	LSM14A mRNA processing body assembly factor [Source:RGD Symbol;Acc:1305695]	CAGTTTCCCACACGTCTATCACTACTCAATGTTTTATTGAGAAAGTTAACAAAAGCCAAT
chr1	Lsp1	+	197648412	intron	AATAAA	-0.918025	0.453258	1	N	Not Sig	ncbiRefSeq	lymphocyte-specific protein 1 [Source:RGD Symbol;Acc:1306133]	AAGTCCTGCCCTGTTTATGGATCCTTCGTTTTGTGTAATAAAGTGCATTGAGTGTCCCCT
chr1	Lsr	-	86185768	5UTR	none	1.32037	0.980049	1	N	Not Sig	ncbiRefSeq	lipolysis stimulated lipoprotein receptor [Source:RGD Symbol;Acc:69236]	CGCGGCCTGGGGCCTGCTTCCCTGAGTGCTCGCCGCCGCCGCCGCCGCGACTTGAGCTTT
chr1	Ltbp3	+	203045973	3UTR	AATAAA	-0.0575239	1	1	N	Not Sig	ncbiRefSeq	latent transforming growth factor beta binding protein 3 [Source:RGD Symbol;Acc:62057]	TGTGCCTGACCTGCTGACCAGGCTGACATGGTTTGTACAATAAATACATCCTCCGGGCCT
chr1	Ltbp4	-	82600135	unassigned	none	-0.0587796	1	1	N	Not Sig	ncbiRefSeq	latent transforming growth factor beta binding protein 4 [Source:RGD Symbol;Acc:1307033]	CCGAGGAGTGACTCAGCACACAGTGGAGCCAGCTTTTGAGAAAGAGAAAAAGGCTGAGGC
chr1	Lto1	+	200080951	exon	AATAAA	-0.435207	0.142714	1	N	Not Sig	ncbiRefSeq	LTO1 maturation factor of ABCE1 [Source:RGD Symbol;Acc:1304637]	GTCATCATATCTTACTTTCCTATTATATTTGGGAAAATGAATAAATAGTGTATTTAAAGT
chr1	Ltv1	-	7565672	unassigned	AATAAA	-0.189735	0.580929	1	N	Not Sig	ncbiRefSeq	LTV1 ribosome biogenesis factor [Source:RGD Symbol;Acc:1311264]	CATCTGCGAACAACGACTCTGACAACCATACAAATAAATGAGCACACCAATTCCGTTCAT
chr1	Luzp2	+	105983247	3UTR	AATAAA	-0.212239	0.26303	1	N	Not Sig	ncbiRefSeq	leucine zipper protein 2 [Source:RGD Symbol;Acc:6496163]	CCTTTTATGTACATAAACTATGTCAATAAACTAGTGCCTCAGACCTGTGAGCCCTAATGA
chr1	Luzp2	+	105983605	3UTR	TATAAA	-0.106439	0.781738	1	N	Not Sig	ncbiRefSeq	leucine zipper protein 2 [Source:RGD Symbol;Acc:6496163]	GCTGTTTTAGGTGGACAAGATGTATAAATGGACTGAAATTAAATTTGTGAATTTGCTGTA
chr1	Lyrm1	+	174304754	3UTR	TATAAA	0.143159	0.752289	1	N	Not Sig	ncbiRefSeq	LYR motif containing 1 [Source:RGD Symbol;Acc:1563498]	ATCTCCTGACTCTTGTAATTTCCAAATTTATCCCTTTATAAAGGGCAGCTTTGGATTGAT
chr1	Lyrm1	+	174305053	3UTR	AATAAA	0.113253	0.928592	1	N	Not Sig	ncbiRefSeq	LYR motif containing 1 [Source:RGD Symbol;Acc:1563498]	AGTACATGCCTTAATTAAACATGTGTTTATTTTAAAATAAACTGTGATTACTTAAGATGC
chr1	Lysmd4	+	120841261	intron	ATTAAA	0.0447376	1	1	N	Not Sig	ncbiRefSeq	LysM domain containing 4 [Source:RGD Symbol;Acc:1592887]	GCTTTCACCAAGGCTGCATCAGCTACACAATTAAAAAAAAAAAAACACCTATCTCCTAAA
chr1	Lysmd4	+	120842659	CDS	ACTAAA	-0.0782766	0.816771	1	N	Not Sig	ncbiRefSeq	LysM domain containing 4 [Source:RGD Symbol;Acc:1592887]	AGTGAGAAATCATGGGATCCTCACAGAGACCCACCAAGAACTAATGCCCCTTGGGGCCTC
chr1	Lysmd4	+	120845145	3UTR	AATAAA	-0.407761	0.312392	1	N	Not Sig	ncbiRefSeq	LysM domain containing 4 [Source:RGD Symbol;Acc:1592887]	TACAGTTTTAACTTGTATTTCTGTATTTTTCTCAAGTGGAATAAAATTTCTTCTGTGAAG
chr1	Lyve1	-	164962871	unassigned	ATTAAA	0.667374	0.397829	1	N	Not Sig	ncbiRefSeq	lymphatic vessel endothelial hyaluronan receptor 1 [Source:RGD Symbol;Acc:1310864]	CACATTAAAACTGTGACACTGACCAATTTAAATGAGACCATTTGAAGCAAAGACAGCCCA
chr1	Lyve1	-	164963097	3UTR	AATACA	3.05529	0.0417714	1	N	Not Sig	ncbiRefSeq	lymphatic vessel endothelial hyaluronan receptor 1 [Source:RGD Symbol;Acc:1310864]	TTCTTCTTGATAGAAAACATAAGAGCTTGGTAATGCATTTGTTAAAGGGACACGAAGTGT
chr1	Lzts2	+	243888487	3UTR	GATAAA	-0.168684	0.968686	1	N	Not Sig	ncbiRefSeq	leucine zipper tumor suppressor 2 [Source:RGD Symbol;Acc:1359249]	AAAAAAAAAAAGTTTTGTTAAAAAAAAAGGCTTGATGGATAAACTCTAGGGGAATTTGTT
chr1	Macrod1	+	204262837	intron	none	1.29732	0.534183	1	N	Not Sig	ncbiRefSeq	mono-ADP ribosylhydrolase 1 [Source:RGD Symbol;Acc:628701]	TAGAGCCATTCCGGGAGGGTGGATGGGGTTAAGCTGAAGCCTCCCCCCCCATAACATCCC
chr1	Macrod1	+	204283264	3UTR	TATAAA	-0.317912	1	1	N	Not Sig	ncbiRefSeq	mono-ADP ribosylhydrolase 1 [Source:RGD Symbol;Acc:628701]	TCCTGCAAGATTATTTTTAGTCTTTAACTCTCATGATCTGGTATAAATTACATCTCCAAC
chr1	Macrod1	+	204387026	3UTR	AATAAA	0.203722	0.770116	1	N	Not Sig	ncbiRefSeq	mono-ADP ribosylhydrolase 1 [Source:RGD Symbol;Acc:628701]	CGAGCCTGTCCTGCCCTGCCTTTAAGAAGCCTCCTAATAAAGCTGTCTGGTTCAGCCCTC
chr1	Mag	-	86148226	unassigned	AATACA	0.754624	0.276697	1	N	Not Sig	ncbiRefSeq	myelin-associated glycoprotein [Source:RGD Symbol;Acc:3035]	CTGCAGGCTCCAGACAGGGCGTATTTCTATGCATGCACTCAAAACACACATACACATAAG
chr1	Mag	-	86148401	3UTR	none	0.277498	0.598159	1	N	Not Sig	ncbiRefSeq	myelin-associated glycoprotein [Source:RGD Symbol;Acc:3035]	GTTACAGCAACGAGAAAAGTATTACTAATATGCCCCTTTCCTCCAAAGGATGGGTCTAGA
chr1	Magel2	+	115884679	3UTR	TATAAA	2.50029	0.0320014	0.977142	N	Not Sig	ncbiRefSeq	MAGE family member L2 [Source:RGD Symbol;Acc:1583615]	CATTAGTAAAATACTGTCTGGAGAAAAGTGAAGATCTATATCTATATAAATATACTTTCA
chr1	Mamdc2	-	220863958	unassigned	GATAAA	0.335277	0.822684	1	N	Not Sig	ncbiRefSeq	MAM domain containing 2 [Source:RGD Symbol;Acc:1305129]	AGTAGAGTTTGCGATTATGTAATGGTTATGTTCTGATAAAGATAAATAATGTAGTGATGA
chr1	Mamstr	+	96116294	3UTR	ATTAAA	0.358761	0.711665	1	N	Not Sig	ncbiRefSeq	MEF2 activating motif and SAP domain containing transcriptional regulator [Source:RGD Symbol;Acc:1588652]	GTGTCTGGCTGGTGAATTAAACTGTGGCTCTCTCACGTGGTCTGAGGCTCACGAGACTGG
chr1	Man2a2	-	134304713	unassigned	AATAAA	-0.121343	0.81596	1	N	Not Sig	ncbiRefSeq	mannosidase, alpha, class 2A, member 2 [Source:RGD Symbol;Acc:1310238]	GTGTGTGCTTGTGATTAATATTTGTCCTGTCAGACAAATAACTGACAAGTCACTGCACAT
chr1	Map3k10	-	82955782	unassigned	none	0.0393362	0.795163	1	N	Not Sig	ncbiRefSeq	mitogen activated protein kinase kinase kinase 10 [Source:RGD Symbol;Acc:1308381]	GCCATTGTGGGGTAAGTCAGCATCAGGGCCGAGGCTGGGGAAGCACACACAGCCAAGCTT
chr1	Map3k11	+	202988652	3UTR	AATAAA	-0.0113118	1	1	N	Not Sig	ncbiRefSeq	mitogen-activated protein kinase kinase kinase 11 [Source:RGD Symbol;Acc:1359261]	AAGGTTGGAGCCTTGGCCTGGGGAGCCAATGAAGCCAAATAAACTTGTAAGCTGTCTCCC
chr1	Map3k4	+	48519357	3UTR	AATAAA	0.305796	0.60409	1	N	Not Sig	ncbiRefSeq	mitogen activated protein kinase kinase kinase 4 [Source:RGD Symbol;Acc:1311192]	TTCATAAGTGAAACTGAAGAAAAGGTTCTTTTTCAATAAATGGTTTATTTTAGGAAAGCT
chr1	Map3k5	+	14904319	3UTR	AGTAAA	-0.0588257	1	1	N	Not Sig	ncbiRefSeq	mitogen-activated protein kinase kinase kinase 5 [Source:RGD Symbol;Acc:1306565]	TTGTTCTAAAGCTATCCGTTGTGTCATATTTACAGAAAAGTAAAAAGATTGCCGGAATGC
chr1	Map3k5	+	14904934	3UTR	AATAAA	-1.87317	0.0925297	1	N	Not Sig	ncbiRefSeq	mitogen-activated protein kinase kinase kinase 5 [Source:RGD Symbol;Acc:1306565]	CTCCAATAAAAGAGAAATGGCCTTTATTTCTATGTGAAAATAAAAGTACAATGTGTCATA
chr1	Map4k1	+	84292496	3UTR	AATAAA	0.172045	0.889767	1	N	Not Sig	ncbiRefSeq	mitogen activated protein kinase kinase kinase kinase 1 [Source:RGD Symbol;Acc:1305463]	TAGTGGTCACAACATGTCCTTATCTCCCAATAAACTTGACTTTAGTCTTGTCATCTTGAA
chr1	Map4k2	+	203660515	3UTR	AATAAA	-0.000985859	0.959752	1	N	Not Sig	ncbiRefSeq	mitogen activated protein kinase kinase kinase kinase 2 [Source:RGD Symbol;Acc:1308199]	CCAAAGTTATATGTAGACAGGGCTGCGTCAAAAATAAATAAAACTTGCCTTCTCATTTAT
chr1	Map6	+	153605533	intron	AATAAA	0.688942	1	1	N	Not Sig	ncbiRefSeq	microtubule-associated protein 6 [Source:RGD Symbol;Acc:61804]	TACACACTCTGAGTCCTGCCTGCTGTGATGTTAATAAATCTCTTCCCTGGACGATGATTC
chr1	Map6	+	153634414	3UTR	AATAAA	-0.366669	0.72403	1	N	Not Sig	ncbiRefSeq	microtubule-associated protein 6 [Source:RGD Symbol;Acc:61804]	TCTGCATGAAACCGTGCTGTATAGTCTTGCTGGAATCTAATAAAACTGGTTCCTCTGGCT
chr1	Map7	+	15037573	exon	AATAAA	0.0872359	0.760532	1	N	Not Sig	ncbiRefSeq	microtubule-associated protein 7 [Source:RGD Symbol;Acc:1308866]	GTTCTATTTATTTAAATCTACCAAACATAAAATACAAATAAAATGTTTGACATAGTTTTG
chr1	Mapk1ip1	-	193655318	unassigned	ATTATA	-0.041527	0.929659	1	N	Not Sig	ncbiRefSeq	mitogen-activated protein kinase 1 interacting protein 1 [Source:RGD Symbol;Acc:1565431]	TTGGTTGGTTGGTTGGTTGGTTTTTTTTGGGGGGGGGTGGGGGGGCAAAACAACATTATA
chr1	Mapk3	+	181372863	3UTR	TATAAA	0.190776	0.424403	1	N	Not Sig	ncbiRefSeq	mitogen activated protein kinase 3 [Source:RGD Symbol;Acc:3046]	GCCCCTCCCCACCTCCCTGTGCCTGTATCTAATATATAAATATAGAGATGTGTATATGGA
chr1	Marchf5	+	234952637	3UTR	AATAAA	0.534003	0.192016	1	N	Not Sig	ncbiRefSeq	membrane associated ring-CH-type finger 5 [Source:RGD Symbol;Acc:1305617]	AACAAATATAGATTGAGCTGTATTAGGTTGTAAATAATAAATATTTTAGTAAAGACTGGT
chr1	Marchf5	+	234953849	3UTR	AATAAA	-0.805169	0.0864214	1	N	Not Sig	ncbiRefSeq	membrane associated ring-CH-type finger 5 [Source:RGD Symbol;Acc:1305617]	ATTACTTATAAAATGATTGACGAATATATAATAAAGTGGCTTCATTAGTCACTGCCTGCT
chr1	Mark2	-	204461028	3UTR	none	0.0888821	0.679974	1	N	Not Sig	ncbiRefSeq	microtubule affinity regulating kinase 2 [Source:RGD Symbol;Acc:708483]	AGGGGTGGGGGGTGGGGACTGGGTCCCCGCCCAGCAGGGAGAAGGAACAGGAGGCAGCAG
chr1	Mark4	-	79075352	unassigned	none	0.138129	0.61916	1	N	Not Sig	ncbiRefSeq	microtubule affinity regulating kinase 4 [Source:RGD Symbol;Acc:1591792]	CTGGGCCCTCCAGGGTTCTGGTCATCTCCAGCCCCTTTCCCATAGATGGGCTCTGTACGT
chr1	Mas1	+	47911257	3UTR	none	2.18333	0.0365698	1	N	Not Sig	ncbiRefSeq	MAS1 proto-oncogene, G protein-coupled receptor [Source:RGD Symbol;Acc:3049]	TTCTATCATTATCAAAGACTCATTCTTCTCTTAGCTGTCCAGTAGTGTTCAACAGTTAAC
chr1	Mas1	+	47911375	3UTR	none	-1.31752	0.127271	1	N	Not Sig	ncbiRefSeq	MAS1 proto-oncogene, G protein-coupled receptor [Source:RGD Symbol;Acc:3049]	TGTGTGATGACTGCTGTGTGCTCCTAGGTGACCTCAGGCAAGTGGCTTGGGAGAGCCTGA
chr1	Mas1	+	47911497	3UTR	AATAAA	0.0849616	0.884244	1	N	Not Sig	ncbiRefSeq	MAS1 proto-oncogene, G protein-coupled receptor [Source:RGD Symbol;Acc:3049]	GGTAGGCAAAGCACCCAGCTCACTGTCAAAGTTCAATAAATATCCGTCTCTCCTTGTCCT
chr1	Maz	-	181629741	unassigned	AATAGA	0.225318	0.500917	1	N	Not Sig	ncbiRefSeq	MYC associated zinc finger protein [Source:RGD Symbol;Acc:1594632]	TAGAAGAGGTGAGGCACACACACAACAGGGGCTTGACGAAGATAACACAGGAACCCAGAG
chr1	Mboat7	+	65539535	3UTR	AATAAA	0.258625	0.337106	1	N	Not Sig	ncbiRefSeq	membrane bound O-acyltransferase domain containing 7 [Source:RGD Symbol;Acc:1306945]	TCATCCTTGGCCTCTGACAGGTCAGAATGTATAAATCTTTCCCAATAAAGTGTTACACAT
chr1	Mcee	+	117987778	3UTR	ATTAAA	0.103323	0.862095	1	N	Not Sig	ncbiRefSeq	methylmalonyl CoA epimerase [Source:RGD Symbol;Acc:1309966]	ACTATTTCTACTACTTTAAAACTTTAATTGCAGAAAGATTAAAATATATACACATGTATA
chr1	Mcmbp	-	183270597	unassigned	none	-0.908107	0.391558	1	N	Not Sig	ncbiRefSeq	minichromosome maintenance complex binding protein [Source:RGD Symbol;Acc:1306730]	TTCCAGTTCAGCTTGAGGAGACGATATCTCGTGTTTCTAATTCATGAAAAATGGCTCAGG
chr1	Mcmbp	-	183271558	3UTR	none	-0.0660636	0.898817	1	N	Not Sig	ncbiRefSeq	minichromosome maintenance complex binding protein [Source:RGD Symbol;Acc:1306730]	CCCTTCAGTCCCACAGAAGACAGCTGCAGATGCAGGAGGTGAGAGAGTTAAGGACAATGT
chr1	Mcmbp	-	183271976	3UTR	none	-0.326571	0.794923	1	N	Not Sig	ncbiRefSeq	minichromosome maintenance complex binding protein [Source:RGD Symbol;Acc:1306730]	GCTGGCACTTCAGTCTGGCCTAAGATGTAGCCGTGGCTAAGGAAATGGTGTGATCAGCAA
chr1	Me3	+	143731932	3UTR	TATAAA	0.338723	0.592095	1	N	Not Sig	ncbiRefSeq	malic enzyme 3 [Source:RGD Symbol;Acc:1311070]	GTTTGGGCTCAATGAAGAAATACAATATAAACAGGTTCCAAAATGGCCAGTCTTGTCACC
chr1	Me3	+	143733722	3UTR	ATTAAA	-0.568791	0.423829	1	N	Not Sig	ncbiRefSeq	malic enzyme 3 [Source:RGD Symbol;Acc:1311070]	ACGATTTTTTCCCAAAGTGAAAATATGGCTGTCTTAACATTAAAACATAGAATCATTTCA
chr1	Me3	+	143735549	3UTR	none	1.15561	0.401721	1	N	Not Sig	ncbiRefSeq	malic enzyme 3 [Source:RGD Symbol;Acc:1311070]	CAGTGGTAGAGCGCTTGCCTAGCAAGCAGAAGGCCCTGGGTTCGGTCCCCAGCTCCAAAA
chr1	Med10	-	33470063	unassigned	AACAAA	-0.046246	0.86313	1	N	Not Sig	ncbiRefSeq	mediator complex subunit 10 [Source:RGD Symbol;Acc:1310128]	CGTTCTACAAGAACAAAATATGCTGCTCTACATTTGAAGAATGTCACAGAAGTACATGAA
chr1	Med23	-	20490314	unassigned	none	-0.292863	0.622833	1	N	Not Sig	ncbiRefSeq	mediator complex subunit 23 [Source:RGD Symbol;Acc:1307671]	TCGGATGGCTTCTATTCATTTTATTCAGAACGCTCAGAGCAAAGACAAAACTCTCACAAT
chr1	Med25	-	95359960	unassigned	none	-0.362513	0.654449	1	N	Not Sig	ncbiRefSeq	mediator complex subunit 25 [Source:RGD Symbol;Acc:1305137]	GGCCAGGCTGTCACACAAGTGGGTGGATTAGTCAGGGAGAAGGAAAGCCCACGGCCAGAA
chr1	Med29	-	83677960	unassigned	none	0.414533	0.608526	1	N	Not Sig	ncbiRefSeq	mediator complex subunit 29 [Source:RGD Symbol;Acc:1311009]	CCAGAATCCATGATTCATTCTAGCTGGGGCCTTTTCACTTCTGCTTTGGAGCTAAAAATA
chr1	Med29	-	83678297	3UTR	none	-0.62222	0.380905	1	N	Not Sig	ncbiRefSeq	mediator complex subunit 29 [Source:RGD Symbol;Acc:1311009]	GGAGGACGGGAGCAGAAAAATGGGTTAAAAAAAAAAAAAAAAAAAAAAAAAAAGAGTCCA
chr1	Med29	-	83678552	3UTR	AATAAA	0.0386629	1	1	N	Not Sig	ncbiRefSeq	mediator complex subunit 29 [Source:RGD Symbol;Acc:1311009]	TGCCCCCTGCTGGTTCCAGCTACTTACTGTGGCAGGACAAATAAATCAGTAACAGGAACC
chr1	Mef2a	-	120847873	unassigned	none	0.0488599	0.709375	1	N	Not Sig	ncbiRefSeq	myocyte enhancer factor 2a [Source:RGD Symbol;Acc:1359360]	TGCCTGGTGGCCATGCCAGAACCTACTGTTTTCCCCAGGCAAACATGACAGAGTCTGGAT
chr1	Megf8	+	80950610	3UTR	CATAAA	0.228242	0.96375	1	N	Not Sig	ncbiRefSeq	multiple EGF-like-domains 8 [Source:RGD Symbol;Acc:621190]	ATGAGCTGACAGTGTCTCCTGCCCTGTGAAATGTGAACATAAACTTGGCTTTTAAAAAAA
chr1	Megf8	+	80951613	3UTR	AATAAA	0.0914258	0.808252	1	N	Not Sig	ncbiRefSeq	multiple EGF-like-domains 8 [Source:RGD Symbol;Acc:621190]	CCCAATGCACCCAGAGTCCTTCCCCAAGACAATAAAAACTTGTAGGTGGGGTTGGTTTTC
chr1	Meiosin	-	78744503	3UTR	none	1.71236	0.372616	1	N	Not Sig	ncbiRefSeq	meiosis initiator [Source:RGD Symbol;Acc:7528935]	AGCCCTTGGAACTGTAACTGCCTGGATTTAACCACTTCTCCTGACAATGGTGTCAAGGTG
chr1	Meis3	+	76872691	3UTR	GATAAA	0.682601	0.368682	1	N	Not Sig	ncbiRefSeq	Meis homeobox 3 [Source:RGD Symbol;Acc:1308532]	CTCTGACATTCTTCTACCTTTCCTTTTTTTAATGATAAAGTCTTAAAAGTGCAAATCAAA
chr1	Men1	+	203643798	CDS	none	1.65309	0.489733	1	N	Not Sig	ncbiRefSeq	menin 1 [Source:RGD Symbol;Acc:3078]	AGAGTCCAAGCCTGAGGAGCCACCACCACCCAAGAAGCCTGCGTTGGACAAGGGCCCAGG
chr1	Men1	+	203644868	3UTR	GATAAA	-0.00884601	0.877596	1	N	Not Sig	ncbiRefSeq	menin 1 [Source:RGD Symbol;Acc:3078]	TTTTGTACATAGATTTATTTTTCAGTTCCAAGGAAGATAAATACATTTTGTTAAGAAAAA
chr1	Mesd	+	137879999	3UTR	AATAAA	-0.133547	0.56453	1	N	Not Sig	ncbiRefSeq	mesoderm development LRP chaperone [Source:RGD Symbol;Acc:1310344]	TTGTCCCAGTGAAGCTACTGTTGATTGTTGGTTTTTCAAAAATAAAATATGTTTACTGGT
chr1	Mesp2	+	133759207	3UTR	ATTAAA	0.208218	0.84015	1	N	Not Sig	ncbiRefSeq	mesoderm posterior bHLH transcription factor 2 [Source:RGD Symbol;Acc:1305959]	GGTGACAGCTGCCCAGAATCTTGTATACTGGTTCTATAATTGTTTTATAATTAAAAAAAG
chr1	Mettl9	+	175623062	3UTR	AATAAA	-0.0620464	0.98794	1	N	Not Sig	ncbiRefSeq	methyltransferase like 9 [Source:RGD Symbol;Acc:2311609]	AAACTCCTTCTCTTACTATTCAAAAAATGTTTTTAATCATGCTAATAAATGTTTTTGGAA
chr1	Mex3b	+	136859365	3UTR	AATAAA	2.01193	0.000528184	0.0514059	Y	Not Sig	ncbiRefSeq	mex-3 RNA binding family member B [Source:RGD Symbol;Acc:1306790]	GTAATGGTGCTACTTCATTTTTTAAGTATTTCTATATAAATAAAACATTGAAGAAAAATC
chr1	Mfge8	-	133064664	exon	AATAAG	-0.00474949	0.907938	1	N	Not Sig	ncbiRefSeq	milk fat globule EGF and factor V/VIII domain containing [Source:RGD Symbol;Acc:3083]	GGGGGCAGAGAGCAGCACCAGGCATTCTGACTTGGACAGAGCAATAAGGAAGCACAGAAG
chr1	Mfsd13a	+	245233490	3UTR	none	-2.22814	0.0229706	0.790227	N	Not Sig	ncbiRefSeq	major facilitator superfamily domain containing 13A [Source:RGD Symbol;Acc:1309313]	ACCAAACCCGGCCAGACCTTTGCCCCACTGCTGGGCACCTGGCTGCTCTGCTTCTACACA
chr1	Mfsd13a	+	245236313	3UTR	AGTAAA	1.23163	0.053478	1	N	Not Sig	ncbiRefSeq	major facilitator superfamily domain containing 13A [Source:RGD Symbol;Acc:1309313]	AGGCCTCCAAACGCTAAAGAGGCTCATCTCATTTCAAATCAAGTAAAGCCAGCCATTCCG
chr1	Mgmt	+	191937757	3UTR	ATTAAA	-0.792576	0.528565	1	N	Not Sig	ncbiRefSeq	O-6-methylguanine-DNA methyltransferase [Source:RGD Symbol;Acc:3087]	GGTGTTGGAAGCGGATGTGTGGTGGGTACCACTATATTAAAAGAGCTGCATGTGTCCTGG
chr1	Mical2	+	166471714	3UTR	AATAAA	0.0951904	0.720396	1	N	Not Sig	ncbiRefSeq	microtubule associated monooxygenase, calponin and LIM domain containing 2 [Source:RGD Symbol;Acc:1311773]	TGTTTAGGTTTATTTATGATACTTGATGCTGTAAATGAAAATAAATATGGTTCTTTATAA
chr1	Minpp1	+	230379728	3UTR	AATAAA	-0.555397	0.457985	1	N	Not Sig	ncbiRefSeq	multiple inositol-polyphosphate phosphatase 1 [Source:RGD Symbol;Acc:3089]	TTCAAATACCATAAAAATGTTTGCTACAATAAATAAATAAAATTCTTGTGGCTTTACTAC
chr1	Mkrn3	-	115926773	unassigned	ATTAAA	-1.69197	0.0984945	1	N	Not Sig	ncbiRefSeq	makorin, ring finger protein, 3 [Source:RGD Symbol;Acc:1311197]	GTTAATGTTATCATAGAAATTTTCAAAGTCATGTTTTGTAAATCCATTAAAAAGAGTCAG
chr1	Mms19	-	240757278	unassigned	GATAAA	0.00870962	0.920079	1	N	Not Sig	ncbiRefSeq	MMS19 homolog, cytosolic iron-sulfur assembly component [Source:RGD Symbol;Acc:727890]	GGCTGGGAGCTCTCGGTATGTGCCACTACAGCATCTGCAGGATAAAGGGAATACATGGGA
chr1	Mob2	-	197092990	unassigned	AACAAG	-0.0881697	0.767242	1	N	Not Sig	ncbiRefSeq	MOB kinase activator 2 [Source:RGD Symbol;Acc:1562983]	CTTGCACCCTTCCCTACCAAGGAACCTCAGGGAAGGCTCGGAACAATATGAAACAGCAGG
chr1	Mob2	-	197093301	3UTR	none	0.245292	1	1	N	Not Sig	ncbiRefSeq	MOB kinase activator 2 [Source:RGD Symbol;Acc:1562983]	GACTCTGAGCCAAGATCCAGGTGAGGGCTAGGGACAAAAGCTGCAGGGCAGGCCTCTGTA
chr1	Mogat2	-	153521812	intron	AAGAAA	0.236921	1	1	N	Not Sig	ncbiRefSeq	monoacylglycerol O-acyltransferase 2 [Source:RGD Symbol;Acc:1598060]	TGAGGGCTCAAGCTGAGGTTCCAATCAGCCCCATTGGTTTGGAGAAAGAAAGAGAAGGGA
chr1	Morn4	-	240888337	unassigned	TATAAA	0.0279772	0.993807	1	N	Not Sig	ncbiRefSeq	MORN repeat containing 4 [Source:RGD Symbol;Acc:1307336]	CCACAAATATCAAACGGTCGATATTCATGAGGCCTGAAGTCCAGAAAATCCATAACACTA
chr1	Mosmo	+	175287629	exon	AATAAA	1.32344	0.0392241	1	N	Not Sig	ncbiRefSeq	modulator of smoothened [Source:RGD Symbol;Acc:7606925]	ACTTGTATTTTTGTTATTGAGCAAGTTTATCAAAATAAATTGTCTACTAAAGAAACTAAA
chr1	Mosmo	+	175288521	intron	ATTAAA	-0.77866	0.0837426	1	N	Not Sig	ncbiRefSeq	modulator of smoothened [Source:RGD Symbol;Acc:7606925]	AACATTTCGTATTAATTGTTTAAGACAGATTGTTTGTCCATTAAAGCAGCTCTTTCTTAT
chr1	Moxd1	-	21075123	unassigned	AATAAA	-0.480083	0.49638	1	N	Not Sig	ncbiRefSeq	monooxygenase, DBH-like 1 [Source:RGD Symbol;Acc:1310033]	GGTTTGGGTAACTCAGGTCTCAGGCATTTTGAGGCAGAAATAAACACAAAATTTCCAGTA
chr1	Moxd1	-	21075286	3UTR	AATACA	0.258157	0.620176	1	N	Not Sig	ncbiRefSeq	monooxygenase, DBH-like 1 [Source:RGD Symbol;Acc:1310033]	GTAAAACTAGCCACAGAATACATCAGTATTTCCTCAAATGTAAAAATTATTCGAATCAAG
chr1	Mpc1	-	52437744	unassigned	none	0.0705439	0.884251	1	N	Not Sig	ncbiRefSeq	mitochondrial pyruvate carrier 1 [Source:RGD Symbol;Acc:620902]	TTTCAGACAATACTTCTGCAGTTTCCTAACCAACACAGCAAGAGATCCAGTCACACTCAA
chr1	Mpeg1	+	209456690	3UTR	TATAAA	-0.652349	0.0909976	1	N	Not Sig	ncbiRefSeq	macrophage expressed 1 [Source:RGD Symbol;Acc:69275]	AAATATGTAGCTCTACTAACAAAAATGTGTATAAATATTCATTAAAGTGTGTACTTAGCA
chr1	Mphosph10	-	117948133	unassigned	AATAAG	-0.341953	0.661459	1	N	Not Sig	ncbiRefSeq	M-phase phosphoprotein 10 [Source:RGD Symbol;Acc:1307633]	TGAATTCCCTCAGTGACAGACTGTAAGCTGTAAGAGGAAATAAGCCCTTTCCCGCACAAG
chr1	Mrgpre	-	198963785	unassigned	GATAAA	-0.335753	0.314205	1	N	Not Sig	ncbiRefSeq	MAS related GPR family member E [Source:RGD Symbol;Acc:738045]	AGATGATAGATGTACTAGTTTGCTTTCTATTGCTGTGATAAACTCCATGACAAAAAGGAA
chr1	Mrgprf	+	200473576	3UTR	AATAAA	0.741627	0.617822	1	N	Not Sig	ncbiRefSeq	MAS related GPR family member F [Source:RGD Symbol;Acc:708478]	GCCTGTGTAGCCAAAGGAAGTTTTATAAACGATAATAAAGTATGTATTAATACACATTTT
chr1	mrpl11	+	202267287	3UTR	AATAAA	0.0443471	0.950819	1	N	Not Sig	ncbiRefSeq	mitochondrial ribosomal protein L11 [Source:RGD Symbol;Acc:1359665]	CCTGACTTCTGTACATATGCTGTGCCACAGGATCGAGCCTGAATAAACGTCCTTTGTCAT
chr1	Mrpl16	+	208638330	3UTR	ATTAAA	-0.224085	0.582301	1	N	Not Sig	ncbiRefSeq	mitochondrial ribosomal protein L16 [Source:RGD Symbol;Acc:735195]	TCTGAAACACTGTGTCACCCGATTGGCTCTAATTAAAGTTCGAGTGTAATCTCAGGGTAC
chr1	Mrpl16	+	208638483	3UTR	none	-0.35143	0.523195	1	N	Not Sig	ncbiRefSeq	mitochondrial ribosomal protein L16 [Source:RGD Symbol;Acc:735195]	TCTCGTTTGAGTTCAAGGCCACTCACATCTACAAGCAAGATCTTGTCTCCAAAAAAAAAA
chr1	Mrpl17	-	160162180	unassigned	TATAAA	-0.098405	0.650948	1	N	Not Sig	ncbiRefSeq	mitochondrial ribosomal protein L17 [Source:RGD Symbol;Acc:70943]	GAATCAATCAATACAGGGCCCATATAAATAAGTGTTAAAATAAGCAAACTGAGCCAGGAA
chr1	Mrpl17	-	160162720	intron	none	0.0448219	1	1	N	Not Sig	ncbiRefSeq	mitochondrial ribosomal protein L17 [Source:RGD Symbol;Acc:70943]	TGCCACTTCAAGGTCTCACACACTACAAGAGCTCCAAGACCCACCAACACAGGTACCACA
chr1	Mrpl18	+	47841986	3UTR	ATTAAA	-0.043172	0.844937	1	N	Not Sig	ncbiRefSeq	mitochondrial ribosomal protein L18 [Source:RGD Symbol;Acc:1306387]	ATGAGATGTATTTAAGGAAAGTAGTGACTATTTGAAGAACAAATTAAAACGTTTGTAACA
chr1	Mrpl21	+	200537894	intron	AATAAA	-0.0153255	0.946783	1	N	Not Sig	ncbiRefSeq	mitochondrial ribosomal protein L21 [Source:RGD Symbol;Acc:1310203]	TTGGGCTACACAGCAAGACCCTATCTGACAATGATAACAAATAAAATATTTTGTAGGAGA
chr1	Mrpl23	+	197695220	3UTR	AATAAA	0.072229	0.918358	1	N	Not Sig	ncbiRefSeq	mitochondrial ribosomal protein L23 [Source:RGD Symbol;Acc:68343]	CCACAGACCCTAGTGAGCACAGTGGTTCTGACAAGCCCAAATAAAAATTCTTTGTGGAGA
chr1	Mrpl36	-	29965480	unassigned	ATTACA	-0.11073	0.723498	1	N	Not Sig	ncbiRefSeq	mitochondrial ribosomal protein L36 [Source:RGD Symbol;Acc:1306375]	GGAAATGTACTAACCTTCTGAAATCGTTAATTTGATGGTACAAAAAACACTATTACAGGG
chr1	Mrpl36	-	29965838	3UTR	AACAAG	0.674707	0.779651	1	N	Not Sig	ncbiRefSeq	mitochondrial ribosomal protein L36 [Source:RGD Symbol;Acc:1306375]	TGGTCTGATTAGATTTGAAGGAACTGGGCTACAATGTGGGGAAAGCAGGTTCAACAAGGC
chr1	Mrpl43	-	243867254	unassigned	none	-0.0281628	0.86645	1	N	Not Sig	ncbiRefSeq	mitochondrial ribosomal protein L43 [Source:RGD Symbol;Acc:1307593]	TACTATAGTAAGGGCAACAGGACATCCCATGTCCTTCAGAAGACAGCCTTCAACCCTTCA
chr1	Mrpl46	-	132698871	unassigned	none	-0.0537851	0.861089	1	N	Not Sig	ncbiRefSeq	mitochondrial ribosomal protein L46 [Source:RGD Symbol;Acc:1309123]	ACACACACACACACACACACAGGCTTTTCGTAGGCCCAGAAACTTTATCAGAACTGGGGA
chr1	Mrpl48	-	154896662	intron	TATAAA	0.890955	0.848649	1	N	Not Sig	ncbiRefSeq	mitochondrial ribosomal protein L48 [Source:RGD Symbol;Acc:1307576]	TTATAAAGAACCCAGACTCAGGAACTTCACCATAGCAACAGGAAATAGACTAATGCAAAG
chr1	Mrpl48	-	154897036	3UTR	none	0.0640443	0.929609	1	N	Not Sig	ncbiRefSeq	mitochondrial ribosomal protein L48 [Source:RGD Symbol;Acc:1307576]	GAGCTGGGGACCGAACCCAGGGCCTTTCGAGAAACAGAATTCCTTAAAGATACCTGACCC
chr1	Mrpl49	-	203346067	3UTR	none	-0.193559	0.695921	1	N	Not Sig	ncbiRefSeq	mitochondrial ribosomal protein L49 [Source:RGD Symbol;Acc:1309920]	TGCTGCTTTCTTTTGGTTTTGTGTTACAGGAGTTTCTGGAGAGTTTCAGATGATTATTTA
chr1	Mrpl49	-	203346323	3UTR	none	-0.178506	0.459156	1	N	Not Sig	ncbiRefSeq	mitochondrial ribosomal protein L49 [Source:RGD Symbol;Acc:1309920]	GGTTGGTACCTCTCTACCTTAGGTCTGAGGTCAGACAGGGTAGCCAGGCACTATGTATGA
chr1	Mrpl49	-	203346941	3UTR	none	0.195758	0.752766	1	N	Not Sig	ncbiRefSeq	mitochondrial ribosomal protein L49 [Source:RGD Symbol;Acc:1309920]	TCTTGCTTCCCATCTAGAGTTCCCTGTCCAATTTCCCACAATCTAATCCTGCCTCTAGCT
chr1	Mrps11	+	132717251	3UTR	AATAAA	0.0126224	0.997196	1	N	Not Sig	ncbiRefSeq	mitochondrial ribosomal protein S11 [Source:RGD Symbol;Acc:1559901]	ACTGCTGGCCACTGTGGCCAGCTCCAGCCTCTGCTCTGAAAATAAAGGACTGTTCTCTGT
chr1	Mrps12	-	84025895	unassigned	none	-0.0160428	0.999294	1	N	Not Sig	ncbiRefSeq	mitochondrial ribosomal protein S12 [Source:RGD Symbol;Acc:1306221]	TCGGCACCTCAGAGGGGCGCAGACCCTCCTCCACACCCGGGGACAGACACTGAACACTGA
chr1	Ms4a4a	+	208085121	3UTR	AATAAA	-0.432947	0.827003	1	N	Not Sig	ncbiRefSeq	membrane spanning 4-domains A4A [Source:RGD Symbol;Acc:1307006]	CTCTCTATAAGACTATCAGAATGTAATAAATAAACCATCAATTTACTGGGTAAATAACAC
chr1	Ms4a6a	-	208401464	intron	none	0.00197271	0.950017	1	N	Not Sig	ncbiRefSeq	membrane spanning 4-domains A6A [Source:RGD Symbol;Acc:1305800]	CCATGTACATACAAAATGTATGTGTGTGTGAGGGTTACAGTCACTAGAAGCCTCCAACAC
chr1	Ms4a6bl	+	208255398	3UTR	AATAAA	-0.768349	0.350532	1	N	Not Sig	ncbiRefSeq	membrane-spanning 4-domains, subfamily A, member 6B-like [Source:RGD Symbol;Acc:1359381]	AAGAAGTATATATGCTGTTGCTTCAAAATAAAGTGTTTTTGTGATTATCCGTTCTTTTCG
chr1	Mta2	+	205846902	3UTR	AATAAA	0.215253	0.603353	1	N	Not Sig	ncbiRefSeq	metastasis associated 1 family, member 2 [Source:RGD Symbol;Acc:1306743]	CCCTCTGCCTTTTATATGCCAATTCTCAGAAATAAAGATCTTTTGTCTGTTTTTTAACCT
chr1	Mtfr2	+	15138631	3UTR	AATAAA	0.287214	0.836049	1	N	Not Sig	ncbiRefSeq	mitochondrial fission regulator 2 [Source:RGD Symbol;Acc:6494892]	TATAACCTGTATATATGTATATTCTTTTGTAAGTAGATTTTATAATAAATGGATCTTTTG
chr1	Mtg1	+	194944277	3UTR	AGTAAA	-0.118874	0.70602	1	N	Not Sig	ncbiRefSeq	mitochondrial ribosome-associated GTPase 1 [Source:RGD Symbol;Acc:6497155]	CAGAGGAGTCTAAGTTATAATCTGTAATTTAAAAAATGAGTTAAAAGGCCCACTTAAAAA
chr1	Mthfd1l	+	40632911	3UTR	AATAAA	-0.225301	0.79	1	N	Not Sig	ncbiRefSeq	methylenetetrahydrofolate dehydrogenase (NADP+ dependent) 1-like [Source:RGD Symbol;Acc:1307311]	AGCACTGTGCTGCCAAGCCAGTTTTTGTCTTTGAACTGGAAATAAAAGTATTTCTAGAAA
chr1	Mtmr10	+	117910837	3UTR	AATAAA	-0.345861	0.463933	1	N	Not Sig	ncbiRefSeq	myotubularin related protein 10 [Source:RGD Symbol;Acc:1305958]	GCTCAACAGAATGGATGTAAAGGGAATTCTGATGGCTAAATAAAATTTCCATGGAAACCG
chr1	Mtrf1l	-	42208817	exon	AATACA	-1.36785	0.140542	1	N	Not Sig	ncbiRefSeq	mitochondrial translation release factor 1 like [Source:RGD Symbol;Acc:1598312]	TAAGCCCACTAGATAGGCACATAATCAGATCTTAGTTTGAAGAAGCCAACTCTAACACAT
chr1	Mtrr	+	34896162	CDS	none	0.139949	0.892976	1	N	Not Sig	ncbiRefSeq	5-methyltetrahydrofolate-homocysteine methyltransferase reductase [Source:RGD Symbol;Acc:1308671]	AAGAGGAGGAGGCCCCAGCAAAGTATGTGCAAGACAACCTCCAGCATCACAGCCAGCAGG
chr1	Mtrr	+	34898956	3UTR	AATAAA	0.0924063	0.865348	1	N	Not Sig	ncbiRefSeq	5-methyltetrahydrofolate-homocysteine methyltransferase reductase [Source:RGD Symbol;Acc:1308671]	CCAGTTAGACTTCTAATACCAAATTCTCTTGCAAGTTTCGAAAATAAAGCATATAAAAGG
chr1	Mtrr	+	34899425	3UTR	ATTAAA	0.514669	0.398062	1	N	Not Sig	ncbiRefSeq	5-methyltetrahydrofolate-homocysteine methyltransferase reductase [Source:RGD Symbol;Acc:1308671]	ATGTCACTAAGAGACTCCCTGGTCATTATAAGAATTAAAGATTTGAAAAAATAATCTCAA
chr1	Mus81	-	202790294	unassigned	none	-0.480083	0.61346	1	N	Not Sig	ncbiRefSeq	MUS81 structure-specific endonuclease subunit [Source:RGD Symbol;Acc:1311957]	CCAGGGAAATTGGGAGTTCTAGGCCAGCCTGGGTTATATAGCAAGTTCTAGACCAAGCTG
chr1	Mus81	-	202790468	3UTR	none	0.0689706	1	1	N	Not Sig	ncbiRefSeq	MUS81 structure-specific endonuclease subunit [Source:RGD Symbol;Acc:1311957]	ACAATTGGATCTCCCGCAGTCTTCCAGTTCCTGCACATTTCATAAGGACCTTGGCATTGC
chr1	Mus81	-	202791212	intron	none	0.0674796	1	1	N	Not Sig	ncbiRefSeq	MUS81 structure-specific endonuclease subunit [Source:RGD Symbol;Acc:1311957]	TTTATGTTGAACTCCATGCAGGAAGGAAGGGCAGAGGAACCCTCAGCAGCTCTCTGGGGT
chr1	Mvp	-	181594733	unassigned	CATAAA	0.355827	0.760275	1	N	Not Sig	ncbiRefSeq	major vault protein [Source:RGD Symbol;Acc:70932]	ATCACCCAGGCTGGAGGGAAGAGAAAAAAAAGAAAGAAAGAAAAACAAAAACATAAATGT
chr1	Mxi1	+	252383679	3UTR	AATAAA	0.240638	0.519265	1	N	Not Sig	ncbiRefSeq	MAX interactor 1, dimerization protein [Source:RGD Symbol;Acc:3128]	TTTTATGTTTAGATAGGGCTGGGCAAGGAGAAAGAAAATAAAAACAACCATATTCAGCAG
chr1	Myadm	-	65864179	unassigned	GATAAA	-0.0254371	0.908087	1	N	Not Sig	ncbiRefSeq	myeloid-associated differentiation marker [Source:RGD Symbol;Acc:727835]	CCATCTCTTGGAGTCGTTCCTTCCTCCCCACCCACCCACCCCGAGATAAAGAAAGCATGA
chr1	Myb	-	15939770	unassigned	none	-0.174923	0.827125	1	N	Not Sig	ncbiRefSeq	MYB proto-oncogene, transcription factor [Source:RGD Symbol;Acc:1560020]	AAAAGATTATTTTGATATGTAACTACCACCCCGAACCACAGAAAGGAGAGACACCAGGAA
chr1	Myh14	-	95096265	unassigned	none	-0.32036	0.726842	1	N	Not Sig	ncbiRefSeq	myosin heavy chain 14 [Source:RGD Symbol;Acc:1306821]	CACATATCACAGAAGCTGAAGTTCCTTGTGCTCTGGTAACCAATTAGGAACTCAGCCGTG
chr1	Mylpf	+	181832543	3UTR	AATAAA	0.554213	0.815562	1	N	Not Sig	ncbiRefSeq		GCTTGTAGCCGCACCAACTCTCACCCTGACCCCCCAATAAAAGTCAACTGGTCTTTGTTT
chr1	Mypop	+	78650555	3UTR	AATAAA	0.0362335	0.926677	1	N	Not Sig	ncbiRefSeq	Myb-related transcription factor, partner of profilin [Source:RGD Symbol;Acc:1565160]	CCCTCCCCCCTTTCTCTTCAGTGCTGACAAGATGTCAATAAACTTATTTTCATACAATTA
chr1	Myrf	-	206854174	unassigned	none	0.220909	0.635281	1	N	Not Sig	ncbiRefSeq	myelin regulatory factor [Source:RGD Symbol;Acc:1306622]	TAGTCAGCTTGGTCTGAGATGACTCCCACCAGAACGATCTGAAGAAGATGCCAGAGGCAA
chr1	Mzf1	-	73670521	unassigned	AATAAA	-0.00102261	0.824966	1	N	Not Sig	ncbiRefSeq	myeloid zinc finger 1 [Source:RGD Symbol;Acc:1308391]	GGGGGAGCACACCCATGGCCTTGTGAATACTAGCCTATCAATAAACTTTCTGACTCTGGC
chr1	Naa40	-	204410635	unassigned	none	-1.40739	0.109922	1	N	Not Sig	ncbiRefSeq	N(alpha)-acetyltransferase 40, NatD catalytic subunit [Source:RGD Symbol;Acc:1565838]	CACATCAGGCTTTGTCATTGTTGTATTACTTTTCTAGCTGCGATGAAACACCACGACCAA
chr1	Nadsyn1	-	198981565	exon	CATAAA	0.347323	0.844418	1	N	Not Sig	ncbiRefSeq	NAD synthetase 1 [Source:RGD Symbol;Acc:727801]	CCTCTGTGGGCATCCATACACACATATATGTGTATGTACACATAAATAGACTTATTTTGT
chr1	Nadsyn1	-	198981832	3UTR	AATAAA	-0.41977	0.776455	1	N	Not Sig	ncbiRefSeq	NAD synthetase 1 [Source:RGD Symbol;Acc:727801]	TACACAGACATATATGTAGGCCAGAGACCATGCATACATATAAAATAATAAAATACATCT
chr1	Nanos1	+	259901500	3UTR	TATAAA	0.449649	0.315426	1	N	Not Sig	ncbiRefSeq	nanos C2HC-type zinc finger 1 [Source:RGD Symbol;Acc:1308194]	TTTAACAGCTTTTTAGTTTTTTGTACTTTATTTTTCCTATAAAGTCCTTTTCAGAAGTTA
chr1	Nap1l4	-	198709696	unassigned	AACAAA	0.0285718	0.984591	1	N	Not Sig	ncbiRefSeq	nucleosome assembly protein 1-like 4 [Source:RGD Symbol;Acc:1305391]	GTGTGGCCAACTGTGGGCAGTCAGAAGGGGCAAGTGGGCTGACAAACAAACAACAAAAAA
chr1	Napa	+	76805869	3UTR	AATAAA	0.212797	0.514818	1	N	Not Sig	ncbiRefSeq	NSF attachment protein alpha [Source:RGD Symbol;Acc:620855]	CTGTCGACTTGAAGCTGCGGCTGGCCCAAGAAAGACAATAAAACCTGCCACTTTTGCATG
chr1	Nars2	+	151382633	CDS	AATGAA	0.679874	0.615771	1	N	Not Sig	ncbiRefSeq	asparaginyl-tRNA synthetase 2, mitochondrial [Source:RGD Symbol;Acc:1305145]	AACTATCCATCAGAACTCAAGCCCTTCTACATGCGGGAGAATGAAGATGATCCTCAGAAC
chr1	Nars2	+	151412068	3UTR	AATAAT	0.719002	0.348798	1	N	Not Sig	ncbiRefSeq	asparaginyl-tRNA synthetase 2, mitochondrial [Source:RGD Symbol;Acc:1305145]	TTGAATTTATATGTATCAAATTATCAAATAATTTTAAAATAACATGCATACCTAAAATAA
chr1	Nat14	-	68910598	unassigned	none	-0.0661396	0.92384	1	N	Not Sig	ncbiRefSeq	N-acetyltransferase 14 [Source:RGD Symbol;Acc:1565991]	CAGAAGGAGGGAGTCTGGAGAGAGCAGCTGGAAAATGCATCAGAGAGGAGACAGGCACAC
chr1	Nav2	+	99322336	3UTR	AATAAA	0.290813	0.680393	1	N	Not Sig	ncbiRefSeq	neuron navigator 2 [Source:RGD Symbol;Acc:619778]	TCTGACGATTGTACCAGTCTTAAATTATTCATGATTCAATAAACTTAATGCTTATTTATT
chr1	Nccrp1	-	83835082	unassigned	AATGAA	-0.194002	1	1	N	Not Sig	ncbiRefSeq	NCCRP1, F-box associated domain containing [Source:RGD Symbol;Acc:1305932]	GTGGGTGGGATGTGGACTGAGGGGATCCTAATGAACAGAGAGCAGGCAGACGACCCGCCT
chr1	Ncoa7	+	27016949	3UTR	AATAAA	-0.0138355	1	1	N	Not Sig	ncbiRefSeq	nuclear receptor coactivator 7 [Source:RGD Symbol;Acc:1566426]	ATACCAACTACATGTAATGCAGTGCTACTCCAATATTTTCAATAAAGGAATTTATGCATT
chr1	Ndn	+	115850767	3UTR	AATAAA	0.00319144	0.666006	1	N	Not Sig	ncbiRefSeq	necdin, MAGE family member [Source:RGD Symbol;Acc:1310526]	GCACACTTTGCAAAACATGTATCCAACCCCACCATAAATAAACTTTAAAATGAGCATTAA
chr1	Ndufa3	-	65597561	unassigned	AACAAA	0.14908	0.621508	1	N	Not Sig	ncbiRefSeq	NADH:ubiquinone oxidoreductase subunit A3 [Source:RGD Symbol;Acc:1588687]	CCTAGGCTACATATATGAAACTTCCTTGTCTCAAAACAACAAAAAAGGACCCCACAAAAG
chr1	Ndufb8	-	243408658	unassigned	none	0.0422409	0.956147	1	N	Not Sig	ncbiRefSeq	NADH:ubiquinone oxidoreductase subunit B8 [Source:RGD Symbol;Acc:1309129]	ACCGGCTCCTTGTGGAAGTGACTATTCCTGGGGAAAGGAGACACGGATACCACAGTACTG
chr1	Ndufc2	+	151718187	3UTR	ATTAAA	0.0450253	0.946223	1	N	Not Sig	ncbiRefSeq	NADH:ubiquinone oxidoreductase subunit C2 [Source:RGD Symbol;Acc:1307511]	TTTCTGTGACAGTGAAGTTTAGGTTAATATGTTAACACCTGTAATTAAAATAGTTATTAT
chr1	Ndufs8	-	201140584	exon	AATAGA	0.0122509	0.988738	1	N	Not Sig	ncbiRefSeq	NADH:ubiquinone oxidoreductase core subunit S8 [Source:RGD Symbol;Acc:1309436]	CAAACCAGAGGCCTGGCTGCGTGGGGTAGATTCTGCCCTAGAAATAGAACACAACAGGCA
chr1	Ndufv1	-	201300364	unassigned	AACAAA	0.135218	0.686704	1	N	Not Sig	ncbiRefSeq	NADH:ubiquinone oxidoreductase core subunit V1 [Source:RGD Symbol;Acc:1359247]	GGAACAAATCTGCACTCATGGGTGGGGGATAGAGGGGAGAAAAGGGAAGTCCCAGAAAAG
chr1	Nectin2	-	79372122	unassigned	none	-0.74737	0.53462	1	N	Not Sig	ncbiRefSeq	nectin cell adhesion molecule 2 [Source:RGD Symbol;Acc:1309505]	ATTCATTTCCCTCACATGCTTCCCCACTCCCTTCACATCTCACAGAAAACACAAGACTTT
chr1	Nectin2	-	79380393	intron	ATTACA	-0.458131	0.99501	1	N	Not Sig	ncbiRefSeq	nectin cell adhesion molecule 2 [Source:RGD Symbol;Acc:1309505]	CATTCAGTCATTCCCCAGGACACAAAGAGAGGGGTCTGATGTATTACAAAACACCCCTGA
chr1	Nell1	+	100573869	3UTR	AATAAA	-0.181909	0.85316	1	N	Not Sig	ncbiRefSeq	neural EGFL like 1 [Source:RGD Symbol;Acc:620998]	TTATTTTTCTTGATTTTTGGATCAAATTCTAAAAATAAAGTTGCCTGTTGTGACTTTCGT
chr1	Neu3	-	154137731	unassigned	none	0.770705	0.441609	1	N	Not Sig	ncbiRefSeq	neuraminidase 3 [Source:RGD Symbol;Acc:619881]	AGGCTGGAGAAAGCATCTGACCTTACAATGCTGCTTTCTCAAGTCTTTTTTTTTTTTTGA
chr1	Neurl1	+	246152888	3UTR	AATAAA	-0.042909	0.886926	1	N	Not Sig	ncbiRefSeq	neuralized E3 ubiquitin protein ligase 1 [Source:RGD Symbol;Acc:1307021]	TAGCATTGCCTCCTTTGTGAACTGGGTCACTGTGTTTGTGAATAAAGGTGATTTCGTACC
chr1	NEWGENE_1309147	+	78910452	3UTR	AATATA	-0.378645	0.635321	1	N	Not Sig	ncbiRefSeq		AAAATTTCCCTTCCCCCCACAAAACCCAAATATATATATATACTTTTTCTTAAAAAAAAA
chr1	Nfatc2ip	-	180954833	unassigned	none	0.0675381	0.982795	1	N	Not Sig	ncbiRefSeq	nuclear factor of activated T-cells 2 interacting protein [Source:RGD Symbol;Acc:1359096]	ATAACTAACGGTTCCTATCACAAGAACATCAACTGGGATCCCATGAGAACCACAAAGACA
chr1	Nfkbib	-	84046291	unassigned	AACAAG	0.132986	0.867118	1	N	Not Sig	ncbiRefSeq	NFKB inhibitor beta [Source:RGD Symbol;Acc:621887]	GCTCACTTGGCTCTGGAGGGATGGGACCTGAAACAAGTAGGAAGGCAGTGTGGGCCTGCG
chr1	Nfkbid	+	85690413	3UTR	ATTAAA	2.08626	0.047531	1	N	Not Sig	ncbiRefSeq	NFKB inhibitor delta [Source:RGD Symbol;Acc:1308055]	AGTGAATTGCTCCCCTTGGTCTGTATCCCTTTAGCTACCAATTAAACTCGATTTGGCCTC
chr1	Ngrn	+	134218484	exon	AATGAA	-0.11102	0.676853	1	N	Not Sig	ncbiRefSeq	neugrin, neurite outgrowth associated [Source:RGD Symbol;Acc:1583734]	AAGGGTTTTAAAAAGTAAGTTTATACCCACTTTAGAGCAGAAACTGAAGCAGGACCAAAA
chr1	Ngrn	+	134219347	exon	AATAAA	-0.0927723	0.667512	1	N	Not Sig	ncbiRefSeq	neugrin, neurite outgrowth associated [Source:RGD Symbol;Acc:1583734]	TGTCTAATCAGTTGGTTTCCTTATGTGCAGAATAAAGTAAAATGGTGCGGTTTGATGCTT
chr1	Nhlrc2	+	255648903	exon	ATTAAA	0.929777	0.409628	1	N	Not Sig	ncbiRefSeq	NHL repeat containing 2 [Source:RGD Symbol;Acc:1307348]	AAAGCTCTCCCAAGGCTTTGTACACTCTTTTTCATGAAATAGATTAAATATTTTTCTCCA
chr1	Nhlrc2	+	255650447	3UTR	AAGAAA	0.71236	0.859087	1	N	Not Sig	ncbiRefSeq	NHL repeat containing 2 [Source:RGD Symbol;Acc:1307348]	AAAGGAGAAAACCTCAAGATGAGAATTATTTGAACCTTGGAGAGTATGGGGAAAAGAATA
chr1	Nhsl1	+	13188578	3UTR	AATAAA	-0.432055	0.517722	1	N	Not Sig	ncbiRefSeq	NHS-like 1 [Source:RGD Symbol;Acc:1308124]	CCATTTAAAAGGTATTTATTAGGTTTTAAGTTTGTTTTGAATAAAACAATTGTAAAGCCA
chr1	Nipa1	-	106833999	exon	AATACA	-0.0620667	0.988035	1	N	Not Sig	ncbiRefSeq	NIPA magnesium transporter 1 [Source:RGD Symbol;Acc:1305401]	AATGATTTAGAACCCAAGAGTACATAAGAACTCCAAGCATTGGGAAAAATTCAACACATA
chr1	Nipa2	-	106799978	unassigned	CATAAA	-0.513962	0.298297	1	N	Not Sig	ncbiRefSeq	NIPA magnesium transporter 2 [Source:RGD Symbol;Acc:1306051]	AACATAGTAAGATCCCTGTCTTAAAAACAAACATAAATAGAGAAACATCATTGGGCTGGG
chr1	Nkain2	+	25872057	exon	AATAGA	0.038926	1	1	N	Not Sig	ncbiRefSeq	sodium/potassium transporting ATPase interacting 2 [Source:RGD Symbol;Acc:7740967]	CAAATTCTATATCTCAGCATCAAGTGATATGCTGAATTGCAAGAGAAGATCAAAATAGAA
chr1	Nkain2	+	25877051	exon	AATAAA	-0.101242	0.765279	1	N	Not Sig	ncbiRefSeq	sodium/potassium transporting ATPase interacting 2 [Source:RGD Symbol;Acc:7740967]	AGTGATTTTTTTGACTTTACTAGTGTAATTTGCATTTTAAAAATAAATGGAAAAATGAAT
chr1	Nkx6-2	-	194380148	3UTR	none	-0.300639	0.819541	1	N	Not Sig	ncbiRefSeq	NK6 homeobox 2 [Source:RGD Symbol;Acc:1307280]	ACAGCCTGTGCCGGACTCGCACCCAGCACTGAGAACCGCGGAAGGTGCCTGCGGAGCCTG
chr1	Nmb	-	134869445	unassigned	none	0.391703	0.374054	1	N	Not Sig	ncbiRefSeq	neuromedin B [Source:RGD Symbol;Acc:1562710]	TCCACCCTCCAGAGAGCCCTTCCCTTTTTCCTCAAATGTGGGTGGAAGGAGAGGCCCAGA
chr1	Nmbr	+	9146081	3UTR	AATAAA	0.160289	0.917267	1	N	Not Sig	ncbiRefSeq	neuromedin B receptor [Source:RGD Symbol;Acc:3181]	TTTCTTCTCTGCATGGTATTACAGTTTTCACCAAATAAACATCTTTCCATTTGTCAAGAA
chr1	Nmrk1	+	216076791	3UTR	AATAAA	-0.358138	0.341212	1	N	Not Sig	ncbiRefSeq	nicotinamide riboside kinase 1 [Source:RGD Symbol;Acc:1564687]	AATTAAAATCATGAATTCATGTATGGAGATTGTTTATTAATAATAAAAATAACTGCCCAT
chr1	Noc3l	-	236556788	exon	AATAAA	-0.249384	0.615412	1	N	Not Sig	ncbiRefSeq	NOC3-like DNA replication regulator [Source:RGD Symbol;Acc:1560656]	AAGTAAATAAATTTAAAAATTCAAATTAAATCACATCAAAAAAATAAAAACCATGAAGGT
chr1	Nolc1	+	244930360	CDS	none	0.119788	1	1	N	Not Sig	ncbiRefSeq	nucleolar and coiled-body phosphoprotein 1 [Source:RGD Symbol;Acc:621578]	AGGGTCAGGGAGGAGGAGATTGAGGTGGACTCTCGAGTAGCAGACAATTCCTTCGATGCC
chr1	Nolc1	+	244931028	3UTR	ATTAAA	0.135499	0.758188	1	N	Not Sig	ncbiRefSeq	nucleolar and coiled-body phosphoprotein 1 [Source:RGD Symbol;Acc:621578]	TTTTGTTGTGATTTTCAGAGATGAGTTCCACAGATTAAAGTCTTTGCCTAAGGCAATGCA
chr1	Nolc1	+	244932087	3UTR	AATAAA	0.0758934	0.862057	1	N	Not Sig	ncbiRefSeq	nucleolar and coiled-body phosphoprotein 1 [Source:RGD Symbol;Acc:621578]	AGGAAGTCTGCATGGTCAAAGTTCTGTGTCTTACTACAAAACAATAAAATGGATGGTCCC
chr1	Nomo1	+	96556280	3UTR	AATAAA	-0.23405	0.771379	1	N	Not Sig	ncbiRefSeq	Nodal modulator 1 [Source:RGD Symbol;Acc:1305240]	GATCTGCCAAGAGCTGGATGAATAAAGTCAGCCACTCATTTGTGGTGTTGTTTCTCTCAG
chr1	Nop53	-	76629083	unassigned	AAGAAA	0.241478	0.83617	1	N	Not Sig	ncbiRefSeq	NOP53 ribosome biogenesis factor [Source:RGD Symbol;Acc:1303085]	AATGGGGTGGGTAGACTTTAGGGGAGAGGACACTGCTTGTAAGAAAATAACAAGACCCCA
chr1	Nosip	+	95558648	3UTR	AATAAA	0.111431	0.959569	1	N	Not Sig	ncbiRefSeq	nitric oxide synthase interacting protein [Source:RGD Symbol;Acc:1309992]	GAAATGTCCCGGCCAGTGATGCAGGCCTGAGCCGTGACCTAATAAACTTGGACGTGAACA
chr1	Nosip	+	95559099	3UTR	none	-0.631829	0.514939	1	N	Not Sig	ncbiRefSeq	nitric oxide synthase interacting protein [Source:RGD Symbol;Acc:1309992]	GACAGCTTTCCTCCGTGCCTCCCCAAACCCGAAACCTGTTCACAAGCAACACAGAACACC
chr1	Npas1	-	77167374	unassigned	AGTAAA	0.0207555	1	1	N	Not Sig	ncbiRefSeq	neuronal PAS domain protein 1 [Source:RGD Symbol;Acc:1310040]	CCATACCATACCACACATGGCCACACATACGAGTAAATAATAATTTTAAAGGAACATGAA
chr1	Npm3	-	244595637	unassigned	none	-0.116649	0.858889	1	N	Not Sig	ncbiRefSeq	nucleophosmin/nucleoplasmin, 3 [Source:RGD Symbol;Acc:1565542]	AGTGCCACCTGGTGGTCCCTAGGGAAATGTCATCTCAGCATTGAAAAAAGCCACACAAGG
chr1	Nr1h2	-	95041966	unassigned	none	0.194116	0.571927	1	N	Not Sig	ncbiRefSeq	nuclear receptor subfamily 1, group H, member 2 [Source:RGD Symbol;Acc:61906]	CCACCCCTCCACCCCCACCCTCGTGGTCGAACCTAGAACCCCTCCACGTTGGGCTCAGGA
chr1	Nr2f2	-	124008281	unassigned	ACTAAA	-2.2987	0.000916785	0.0789934	Y	Not Sig	ncbiRefSeq	nuclear receptor subfamily 2, group F, member 2 [Source:RGD Symbol;Acc:69305]	GACTGAACTGAATAGTTGACTTCCCAAATCAGCACACCCTGTAAAAGTTTTCTTTATTCT
chr1	Nr2f2	-	124009179	3UTR	none	-1.23339	0.0500623	1	N	Not Sig	ncbiRefSeq	nuclear receptor subfamily 2, group F, member 2 [Source:RGD Symbol;Acc:69305]	CAGTGAGAACTCACAGGGGCTCAGCTCGATGCACAGACAGTGAGTGGGGACAGCCAAGCA
chr1	Nrip3	-	163789737	unassigned	none	0.0142123	0.859051	1	N	Not Sig	ncbiRefSeq	nuclear receptor interacting protein 3 [Source:RGD Symbol;Acc:1304777]	AGAAATGCTGACACACTTAGGCCGTGTCCTGGTTCCTCAGCTTCAGAGACTCAGACAAGC
chr1	Nrip3	-	163792396	3UTR	none	-0.0167672	0.585916	1	N	Not Sig	ncbiRefSeq	nuclear receptor interacting protein 3 [Source:RGD Symbol;Acc:1304777]	TTCAAAAGAGACTCTAACATCAAGATATGTTTTTACACCTCTTTGAAACAGCTGAAAGGA
chr1	Nrxn2	+	203842299	intron	AAGAAA	-0.0185878	0.951671	1	N	Not Sig	ncbiRefSeq	neurexin 2 [Source:RGD Symbol;Acc:620211]	GAAAACACCCCAAACCCGGAAATGTGTGGGAAAAAGAAAACAAAAACTTTCCAAATTCCA
chr1	Nsmce1	-	180030354	unassigned	none	0.3835	0.689834	1	N	Not Sig	ncbiRefSeq	NSE1 homolog, SMC5-SMC6 complex component [Source:RGD Symbol;Acc:1307760]	GGACCCACTATCAACAGCAGGGGCAGCAGCCTGTCCTGGTTGGTTTTTCTGTTTAGCTGG
chr1	Nsmce3	-	118401301	intron	AACAAA	-0.245603	0.893801	1	N	Not Sig	ncbiRefSeq		TCATATCCATACAGAATATGTATTTCTAAAGCTGTGTTGACAAGAAGCTAAAACAATTTT
chr1	Nt5c2	-	245770992	unassigned	none	-0.588239	0.430526	1	N	Not Sig	ncbiRefSeq	5'-nucleotidase, cytosolic II [Source:RGD Symbol;Acc:2323387]	ACATGGACAAGCTACTTTTAAATCTGAAATGTAATCGCACATACACAATGTGACCTAAAG
chr1	Nt5c2	-	245771405	3UTR	none	1.67888	0.0978974	1	N	Not Sig	ncbiRefSeq	5'-nucleotidase, cytosolic II [Source:RGD Symbol;Acc:2323387]	TAGGGAAGCTCCCAGGGGAGATGGAGCTGCCACTCTTGTCCTCTAAAGCGCACAGACTTA
chr1	Nt5c2	-	245772252	3UTR	none	-0.0272669	0.99165	1	N	Not Sig	ncbiRefSeq	5'-nucleotidase, cytosolic II [Source:RGD Symbol;Acc:2323387]	AACATGTCCCAGGACAACCAGGGCTACAGAAACTTAAGTCTTTTTAAAAAATGCTAAAAC
chr1	Nt5c2	-	245772536	3UTR	AAGAAA	-0.148718	0.939227	1	N	Not Sig	ncbiRefSeq	5'-nucleotidase, cytosolic II [Source:RGD Symbol;Acc:2323387]	GGAAGAAAACAAAAGTTAGAGCAAGTTCTACAACACAAGTCATGGTTGGAAGTCACAACC
chr1	Nt5c2	-	245773249	3UTR	AATACA	0.0357329	1	1	N	Not Sig	ncbiRefSeq	5'-nucleotidase, cytosolic II [Source:RGD Symbol;Acc:2323387]	CCTGCTCTTCCTATGCAGTTTCAAACCATCTGCAGAGAATACAGATACACAAAACTGAAG
chr1	Ntrk3	-	132116471	unassigned	AATAAA	-0.221641	0.792976	1	N	Not Sig	ncbiRefSeq	neurotrophic receptor tyrosine kinase 3 [Source:RGD Symbol;Acc:3214]	CGACCTACTCAAATCAGGTTACCATTAAACTCAACACAATAAATCCAAATGAACCAATGG
chr1	Ntrk3	-	132232567	intron	AATAAG	0.0101476	0.912783	1	N	Not Sig	ncbiRefSeq	neurotrophic receptor tyrosine kinase 3 [Source:RGD Symbol;Acc:3214]	ACCTAGAATTGCTACATCTTAATACTCTTTGCAAAACTTCCAAATAAGAGGTCTGATGCA
chr1	Nucb1	-	95968324	intron	none	0.0553746	0.918724	1	N	Not Sig	ncbiRefSeq	nucleobindin 1 [Source:RGD Symbol;Acc:620030]	GGGATACAGGGCCTCGTTCATGCTAGGCAAGCATCATTCCAACTGATCCACAGCCCCAGA
chr1	Nucb1	-	95968537	3UTR	none	0.130685	0.887401	1	N	Not Sig	ncbiRefSeq	nucleobindin 1 [Source:RGD Symbol;Acc:620030]	GCCACAGGACACCAGGGAGTCGAGCAGGTGGCATGCAGGGGGACTTGCAAGAGGGCAGTA
chr1	Nucb2	+	170787355	3UTR	AATAAA	-0.0137734	0.910014	1	N	Not Sig	ncbiRefSeq	nucleobindin 2 [Source:RGD Symbol;Acc:620888]	CTTCACTCAATAAATACTTTAAAAGCACATTTGGAATAAAGGAAGAGACTTTTAAGTGAG
chr1	Nudt19	-	88214474	unassigned	AATAAG	0.377502	0.323675	1	N	Not Sig	ncbiRefSeq	nudix hydrolase 19 [Source:RGD Symbol;Acc:1302935]	TAGAAGATGGCAGGACACCCCTTCCCAATGTTCAACCAATAAGGCAACCATTGTGAAACC
chr1	Nudt22	-	204182796	unassigned	none	-0.129109	0.886132	1	N	Not Sig	ncbiRefSeq	nudix hydrolase 22 [Source:RGD Symbol;Acc:735224]	TCACCCATCCCGGGTCCTCTTAGAGGATCCCAGACTCCCAGAAAAGCAGCGGAAGCCAAC
chr1	Nudt8	+	201295233	3UTR	ATTAAA	-0.264296	1	1	N	Not Sig	ncbiRefSeq	nudix hydrolase 8 [Source:RGD Symbol;Acc:1309040]	CCTCTGCCTTGATTTGGCCAGGCTACTCCAGAACTGATTAAAAGAGTGTTTGACAACTCT
chr1	Numa1	+	156372193	3UTR	AATAAA	-0.273618	0.665373	1	N	Not Sig	ncbiRefSeq	nuclear mitotic apparatus protein 1 [Source:RGD Symbol;Acc:1308777]	GCCGGGAATGGATCTTTTCTAAATGTTATTACTTGTAAATAAAGTCTATTTTTCTCCCTT
chr1	Numa1	+	156372854	3UTR	none	-0.631366	0.825474	1	N	Not Sig	ncbiRefSeq	nuclear mitotic apparatus protein 1 [Source:RGD Symbol;Acc:1308777]	AGCTCAGTGGTAGAGCGCTTACCTAGGAAGCGCAAGGCCCTGGGTTCGGTCCCCAGCTCA
chr1	Numbl	+	82573788	3UTR	AATAAA	-0.0839669	0.963052	1	N	Not Sig	ncbiRefSeq	NUMB-like, endocytic adaptor protein [Source:RGD Symbol;Acc:1307579]	CAGATTTGTATTATACAAGGACAGCCAATAAAGGAAGACTATAATGGTGGCCACTGGGAA
chr1	Nup43	+	2157885	3UTR	AATAAA	-0.309793	0.700934	1	N	Not Sig	ncbiRefSeq	nucleoporin 43 [Source:RGD Symbol;Acc:1596513]	ATCATTAGAAAGTGGTATTTGTAAGGAAACAATAAACTGTTAATGCCAGTGCCCAATATT
chr1	Nup62	+	95314899	intron	AATAAA	-0.0618229	0.838154	1	N	Not Sig	ncbiRefSeq	nucleoporin 62 [Source:RGD Symbol;Acc:619938]	TAGCCTCTATGGTCCCTGATCAAAACATTGCTTTTCTAAATAAAGAAAACATTGTGAAAT
chr1	Nup98	-	156494422	unassigned	none	0.00239422	1	1	N	Not Sig	ncbiRefSeq	nucleoporin 98 and 96 precursor [Source:RGD Symbol;Acc:71033]	CCAGGATCTGTTTCTTAAAGATTCCAGAGTTCCCAAAACACAAAGACAAAACCACCAGGA
chr1	Nupr1	-	181213291	unassigned	AATACA	0.195206	0.766433	1	N	Not Sig	ncbiRefSeq	nuclear protein 1, transcriptional regulator [Source:RGD Symbol;Acc:69363]	ATGGACACAGCAAGATACAATACACACAAACACAACAAAGACAGCACAACACACACACAA
chr1	Nxf1	+	205668636	3UTR	GATAAA	0.340734	0.487737	1	N	Not Sig	ncbiRefSeq	nuclear RNA export factor 1 [Source:RGD Symbol;Acc:62014]	ACTTAACCCCAGGATTCCCTTTACTTTTTAAGATAAAGAGTGATATTGTAGTGTGTGTCC
chr1	Oat	-	187347861	unassigned	AATAAA	-0.304999	0.202006	1	N	Not Sig	ncbiRefSeq	ornithine aminotransferase [Source:RGD Symbol;Acc:621724]	ACACTAGAGAAAACTGAAAGAAAATTTAAATACAAATAAAAAAGTAAATAGACTCACATC
chr1	Oat	-	187348004	3UTR	GATAAA	1.23953	3.44488e-05	0.00499027	Y	FDR<0.05	ncbiRefSeq	ornithine aminotransferase [Source:RGD Symbol;Acc:621724]	GCCAGTCATAGGGGTGAAATAATACACTGATTATTACCAAAAGATAAATACAAAATACTC
chr1	Oca2	+	107446092	3UTR	AAGAAA	0.982258	0.898728	1	N	Not Sig	ncbiRefSeq	OCA2 melanosomal transmembrane protein [Source:RGD Symbol;Acc:2318412]	TTATCAACAGCACCGGGTGGAAGATTTCCCCACAGCACCTCTGAAGAAGAAAAAGATGAG
chr1	Oga	-	244598284	unassigned	none	-0.0264284	0.888914	1	N	Not Sig	ncbiRefSeq	O-GlcNAcase [Source:RGD Symbol;Acc:621077]	AGGGATCAGATGTGAGGAAAAAAAGATGGGAGAAACCGGAGAAAAGGCAGCACACCACAC
chr1	Oga	-	244611723	intron	none	1.43427	0.598374	1	N	Not Sig	ncbiRefSeq	O-GlcNAcase [Source:RGD Symbol;Acc:621077]	GCAGCGCAACATAGTTCTTTTCCACTGGAAGACAGCCTTCTACCTCCTGTTCAAGTTAAC
chr1	Olfml1	+	161502539	3UTR	AATAAA	0.227838	0.677599	1	N	Not Sig	ncbiRefSeq	olfactomedin-like 1 [Source:RGD Symbol;Acc:1311854]	TTTTTTGTTGCCTGCTTCTTTCTTCTTGCTTTCAGTGTAATAAAAGTGAGATTAAGCAGA
chr1	Opa3	+	78899549	3UTR	none	-0.125847	0.926839	1	N	Not Sig	ncbiRefSeq	outer mitochondrial membrane lipid metabolism regulator OPA3 [Source:RGD Symbol;Acc:1309147]	GGGTCATCCCATTGTGAGTTCCAGGACAGCCTCCTGAACCACAGAAAGAGGCCCTGTCTT
chr1	Opalin	-	239891136	unassigned	none	-0.0324103	0.598513	1	N	Not Sig	ncbiRefSeq	oligodendrocytic myelin paranodal and inner loop protein [Source:RGD Symbol;Acc:1307776]	AGGAGGCAGAAAGGAGGGAAAAGTTGCATCCTTAATGCAGGGAAAGACAAGCCACAGAGA
chr1	Orai3	+	182386054	3UTR	AATAAA	-0.165684	0.904085	1	N	Not Sig	ncbiRefSeq	ORAI calcium release-activated calcium modulator 3 [Source:RGD Symbol;Acc:1306538]	GCCCTGCTCAGACACTGAGTTTTTGATGCACCTTGTTTTGTAAATAAAGTGTCTCTCACA
chr1	Osbp	+	208918509	3UTR	ATTAAA	-0.707792	0.114056	1	N	Not Sig	ncbiRefSeq	oxysterol binding protein [Source:RGD Symbol;Acc:1308069]	TTTTGCCTTATTGCTTTTTTTCAAAAAAAAAAACTACTAAATTAAATAATTTTTAAAAAT
chr1	Osbpl5	-	198862070	unassigned	none	-0.392694	0.426449	1	N	Not Sig	ncbiRefSeq	oxysterol binding protein-like 5 [Source:RGD Symbol;Acc:1308402]	ACTGCTTTTTCCATCTCCCCAGAATTTCTCCTTGTTCCCAAGGACCCCACACAAGAGAAT
chr1	Ostf1	-	216002036	unassigned	TATAAA	0.7166	0.104762	1	N	Not Sig	ncbiRefSeq	osteoclast stimulating factor 1 [Source:RGD Symbol;Acc:628849]	TGGTATAAAAAGCTTTAGTTATTTAGTTACCAGCAATGAGTGATAGCACAAAAACAGAGA
chr1	Ostf1	-	216002173	3UTR	AAGAAA	1.26474	0.123314	1	N	Not Sig	ncbiRefSeq	osteoclast stimulating factor 1 [Source:RGD Symbol;Acc:628849]	CAAGCATTTCTCCTTTGAAAATCCCACTCAAAACATCTCATTCTTTGAGGTAAAGAACTT
chr1	Otub1	-	204387214	unassigned	none	0.0382044	0.974387	1	N	Not Sig	ncbiRefSeq	OTU deubiquitinase, ubiquitin aldehyde binding 1 [Source:RGD Symbol;Acc:1311329]	AAGAGGCTCCAAAAGCCCTGGGTGAGCCAGGAGGGTAGATGCATGGGCCAGACAGCAGAG
chr1	Otub1	-	204387856	3UTR	none	0.0341324	0.929457	1	N	Not Sig	ncbiRefSeq	OTU deubiquitinase, ubiquitin aldehyde binding 1 [Source:RGD Symbol;Acc:1311329]	AGGGAAAGGGACAGCCAGACACACAGCAGCCAGCGGGCAGGTAGGGAAGGGCAGCAGAGC
chr1	Otud7a	+	117388102	3UTR	AATAAA	0.0572193	0.885229	1	N	Not Sig	ncbiRefSeq	OTU deubiquitinase 7A [Source:RGD Symbol;Acc:1563721]	TTTTTTTTTTTACTTGTTTGGAAAATTATAATAAAACAACTGAGTATCTCCTGTGAGTAA
chr1	Otud7a	+	117388214	3UTR	ATTAAA	-0.0384535	1	1	N	Not Sig	ncbiRefSeq	OTU deubiquitinase 7A [Source:RGD Symbol;Acc:1563721]	TTCAAGTTTTTGCATAAAGTGGTTCCTTAAATCAAAGTTATTTATTAAATAGAATCTTTA
chr1	Ovol1	-	202855815	3UTR	none	1.30599	0.338128	1	N	Not Sig	ncbiRefSeq	ovo like transcriptional repressor 1 [Source:RGD Symbol;Acc:1306956]	TAACTCCTTGGGTGCGTGAGACATACACCCTTTGACCCACAACCCTTGTTTGGTCTCAGC
chr1	P2ry2	-	155352049	unassigned	AACAAA	0.0699749	1	1	N	Not Sig	ncbiRefSeq	purinergic receptor P2Y2 [Source:RGD Symbol;Acc:62088]	CAGGAATTCTAAGTCATTCTGAGCCACATCTCAAGACCCCAAATCAAAGCAACAAAATGC
chr1	P4ha3	+	154663778	3UTR	ATTAAA	1.03893	0.899771	1	N	Not Sig	ncbiRefSeq	prolyl 4-hydroxylase subunit alpha 3 [Source:RGD Symbol;Acc:735150]	TTAAAAGTGGAAAACAATTTTTTTGTGATTTTTTAAATTGTCATTAAAATGTTTTAAATT
chr1	Pabir1	-	222114987	intron	ATTAAA	-0.238399	0.904477	1	N	Not Sig	ncbiRefSeq	PP2A Aalpha (PPP2R1A) and B55A (PPP2R2A) interacting phosphatase regulator 1 [Source:RGD Symbol;Acc:1310316]	GTTCTTCAGTAGATGGAAAATAGCAACCATTGAAAAACACCAAAAATTAGTGTGCCATGA
chr1	Pacrg	+	50305450	intron	CATAAA	0.212378	1	1	N	Not Sig	ncbiRefSeq	parkin coregulated [Source:RGD Symbol;Acc:1561027]	CAAGGCTTTCCAATACATAAATAGTGCCTGTTTCTTAGATTACAATAGTGTACTGTGCTT
chr1	Pacrg	+	50305562	intron	AATAAA	-0.165139	0.776745	1	N	Not Sig	ncbiRefSeq	parkin coregulated [Source:RGD Symbol;Acc:1561027]	GGAGTCCGAGTTAAACCTTCAGTTGTATAGACAATAAAACTATAATTCTCATATGCAATT
chr1	Pacs1	-	202437502	exon	none	-0.0821979	0.912793	1	N	Not Sig	ncbiRefSeq	phosphofurin acidic cluster sorting protein 1 [Source:RGD Symbol;Acc:620579]	GTCACATCTGCTGAGGATGGATGGTTGCAGTGACAGAGTGAGGGACAGGAGCCCAAGAGA
chr1	Paf1	+	83689231	3UTR	AATAAA	-0.122354	0.969493	1	N	Not Sig	ncbiRefSeq	PAF1 homolog, Paf1/RNA polymerase II complex component [Source:RGD Symbol;Acc:1306219]	GTTTTGTGAGCCCTTTGTCCCTACCCTTCAATCTTTGCTGTTAATAAATCTAACTTCTCT
chr1	Pafah1b3	-	80881262	unassigned	none	0.220652	0.868872	1	N	Not Sig	ncbiRefSeq	platelet-activating factor acetylhydrolase 1b, catalytic subunit 3 [Source:RGD Symbol;Acc:620333]	GTCAGGGATCTGGCTGGTGGTGGGACTCAGACAAAACTAACCATAACACAGGAGGCAGAG
chr1	Pagr1	-	181622707	unassigned	AATGAA	0.0423506	0.942384	1	N	Not Sig	ncbiRefSeq		CAGTTCTGCCTCTGCCCAAGTAAGAACATGTGCTTGGGTTGAGCGGCAGTCTCTCCTCTG
chr1	Pak1	+	152226388	3UTR	AATAAA	0.079389	0.968116	1	N	Not Sig	ncbiRefSeq	p21 (RAC1) activated kinase 1 [Source:RGD Symbol;Acc:3250]	GTCCTACTGCCTCAGCAGCACAAGTTTCTATTTCCTTCAATAAAAGGAGATGAAAATACT
chr1	Pak4	-	83849903	unassigned	none	0.0521723	0.903133	1	N	Not Sig	ncbiRefSeq	p21 (RAC1) activated kinase 4 [Source:RGD Symbol;Acc:1307705]	CAGTCTCCAAATTTCCCTTACTACACTGCTGGACAGTGGTCTCCATACACCACACACACA
chr1	Palb2	-	176665075	unassigned	AACAAG	-0.716313	0.775269	1	N	Not Sig	ncbiRefSeq	partner and localizer of BRCA2 [Source:RGD Symbol;Acc:1304759]	TTCTTATTTTTGAACTGATAAGAACAGACTGGGAAAAAAAAGTAGAACAAGACAAGCAGA
chr1	Pank1	-	232324717	unassigned	AGTAAA	0.611432	0.425885	1	N	Not Sig	ncbiRefSeq	pantothenate kinase 1 [Source:RGD Symbol;Acc:1304677]	CTAACTCTGGGTGGGAGGATTATTTATTGGAGAAGACCGAGTAAAGAAAGAGTCAAATAG
chr1	Paox	+	194928504	3UTR	CATAAA	-0.106324	0.924904	1	N	Not Sig	ncbiRefSeq	polyamine oxidase [Source:RGD Symbol;Acc:1561125]	CTGACCATTGATGCCCTGCTAACTGTTGTACACATAAAGCAATTAACACTGCCTGTGTGT
chr1	Papss2	+	230539332	3UTR	AATAAA	0.313574	0.568821	1	N	Not Sig	ncbiRefSeq	3'-phosphoadenosine 5'-phosphosulfate synthase 2 [Source:RGD Symbol;Acc:1307012]	TTGGTGTGACTGTTTCAGTGTCCCGCTGATACTTGTTCTTCAATAAATCTCTCAAAGACC
chr1	Parva	+	166704957	exon	AATAAA	-0.291383	0.509659	1	N	Not Sig	ncbiRefSeq	parvin, alpha [Source:RGD Symbol;Acc:71021]	CATTTCTTCTGCATGATTCCAGAAATACCCTGTGCAAATAAACTCTGAATGAACGTACAA
chr1	Patl1	+	208862904	3UTR	AATAAA	-0.840271	0.157348	1	N	Not Sig	ncbiRefSeq	PAT1 homolog 1, processing body mRNA decay factor [Source:RGD Symbol;Acc:1305514]	AAGTTTCTAAATTTACATTTTTATAGGGTATTGTAAATAAAACAAATTGTATACTTGAAA
chr1	Pc	+	201898411	3UTR	AATAAA	-0.0476893	0.897513	1	N	Not Sig	ncbiRefSeq	pyruvate carboxylase [Source:RGD Symbol;Acc:3262]	CTCAATAAAAGTGGCCTTCCCTTGCCCTCCACACTAGGTCATGTACAGTCTACTCCACCC
chr1	Pcgf5	+	234175314	3UTR	AATAAA	1.48074	0.110467	1	N	Not Sig	ncbiRefSeq	polycomb group ring finger 5 [Source:RGD Symbol;Acc:1583513]	ACTGTCCTATTCTTGGTAAACTTTTATGTAAAAAAGAATAAACAACCAAAAAAAAAAAAA
chr1	Pcgf5	+	234180021	3UTR	ATTAAA	1.33001	0.172144	1	N	Not Sig	ncbiRefSeq	polycomb group ring finger 5 [Source:RGD Symbol;Acc:1583513]	TGTGTATATCTGACCATGTTGAAAATAGTATCTTTGTTATTAAATTTTTGATTGCATATT
chr1	Pcgf6	-	245925353	unassigned	TATAAA	-0.431052	0.512379	1	N	Not Sig	ncbiRefSeq	polycomb group ring finger 6 [Source:RGD Symbol;Acc:1306904]	AAATACCCAAATTATAAAGATGGAAAAAAGAAAAAGAAACTAATGAATATCTCGACACAT
chr1	Pcmt1	-	2111755	unassigned	none	-0.119728	0.691845	1	N	Not Sig	ncbiRefSeq	protein-L-isoaspartate (D-aspartate) O-methyltransferase 1 [Source:RGD Symbol;Acc:3268]	GTGAAAGCGCCTTTTTCTGTTTTGCGTGTGGTGATGTGCAATGACTACCAAGGATCCAGA
chr1	Pcmt1	-	2112552	3UTR	none	0.95613	0.0568391	1	N	Not Sig	ncbiRefSeq	protein-L-isoaspartate (D-aspartate) O-methyltransferase 1 [Source:RGD Symbol;Acc:3268]	TGGCCGTGGGCAGCATCTGGACCTAGACCTGTGTTCTTCCAGATTCAAAGGCCACCAATG
chr1	Pcmt1	-	2113055	3UTR	AAGAAA	1.01878	0.293483	1	N	Not Sig	ncbiRefSeq	protein-L-isoaspartate (D-aspartate) O-methyltransferase 1 [Source:RGD Symbol;Acc:3268]	GAAGTAAGTGTCCAAGAAAAGCAAAGCCACTCTTCCAAACTAAGTCACAAACGAAGCTTT
chr1	Pcmt1	-	2117620	intron	none	0.345722	0.747739	1	N	Not Sig	ncbiRefSeq	protein-L-isoaspartate (D-aspartate) O-methyltransferase 1 [Source:RGD Symbol;Acc:3268]	TGAAGGGAGCCCCCAAAAACAGCTCTTGTAGGCTAAGGTCTTAAAGTCCACACCCTTTCA
chr1	Pcnx3	-	202951321	unassigned	AATGAA	-0.149613	1	1	N	Not Sig	ncbiRefSeq	pecanex 3 [Source:RGD Symbol;Acc:1305529]	TCCTCCCCACCTCAGGCACCTCTACCAACCTCACCTAGTCCCACAGAAAGTAACTGCCAA
chr1	Pcsk5	-	214986921	intron	none	-0.991743	0.194328	1	N	Not Sig	ncbiRefSeq	proprotein convertase subtilisin/kexin type 5 [Source:RGD Symbol;Acc:620326]	AAGTTTCTCGTCCACTGAGCCTTTCAGAGATGTTTACCCATGGGTACGAAGAGATCAAAT
chr1	Pcsk5	-	214989329	3UTR	AAGAAA	1.11397	0.599902	1	N	Not Sig	ncbiRefSeq	proprotein convertase subtilisin/kexin type 5 [Source:RGD Symbol;Acc:620326]	CTGCACAAACTTGAGATAGAGAGAGAGAAAAAAAAAAGATAGCAAGAAAGAGAGAGGTGG
chr1	Pcsk6	+	119627626	3UTR	AATAAA	0.253943	0.689961	1	N	Not Sig	ncbiRefSeq	proprotein convertase subtilisin/kexin type 6 [Source:RGD Symbol;Acc:3246]	TCAGTGAAGCAAATCTAATGTTAACCCTGAGTTAATAAAAGAGTTAACATCCCATTGCAA
chr1	Pdcd11	+	246021280	3UTR	ATTAAA	-0.10316	0.901595	1	N	Not Sig	ncbiRefSeq	programmed cell death 11 [Source:RGD Symbol;Acc:1304933]	GAGCATGCTACATGGACCCAGCTAGCCTTGAACTCTGAAGGGATTAAAGGCACATATTAT
chr1	Pdcd11	+	246021998	3UTR	ATTAAA	-0.344158	0.643242	1	N	Not Sig	ncbiRefSeq	programmed cell death 11 [Source:RGD Symbol;Acc:1304933]	GTTTTTTGTTTGTTGGTTTGAGTCTAAAAGAAATTAAAAGCTTTCTTTGACAGAGTCTAA
chr1	Pdcd2	-	56484946	unassigned	GATAAA	-0.0800519	0.895627	1	N	Not Sig	ncbiRefSeq	programmed cell death 2 [Source:RGD Symbol;Acc:61887]	TTCATACTTCTGTCTTTGGTAACTGTCTATTTAGGATAAAGTCCTGGAGATGGAGATGGA
chr1	Pdcd2l	-	86810291	unassigned	none	0.113966	1	1	N	Not Sig	ncbiRefSeq	programmed cell death 2-like [Source:RGD Symbol;Acc:1589941]	CAGTTAAAGTTAGGCATGGTGGCCTTGGGATCCCAGCACTTGGGAGTCTGAGGCAGGAGG
chr1	Pdcd4	+	252944274	exon	AATAAA	-0.183482	0.811477	1	N	Not Sig	ncbiRefSeq	programmed cell death 4 [Source:RGD Symbol;Acc:620816]	AAACTGGAAAAACGAACCCGGTTCTACAAGAATGTACAACAAAATAAAACATGTGAACAC
chr1	Pdcd5	-	88305868	unassigned	ACTAAA	0.081773	0.840532	1	N	Not Sig	ncbiRefSeq	programmed cell death 5 [Source:RGD Symbol;Acc:1310561]	TGCCACCATTTAAAAGCTCTTGGTAAGAAGGGGAAATCATTCAAAACGCACATCTTCCTT
chr1	Pdcd6	+	28981804	3UTR	AATAAA	0.0406656	0.975296	1	N	Not Sig	ncbiRefSeq	programmed cell death 6 [Source:RGD Symbol;Acc:1311239]	AAACGAAATTTTATCCATTGGAATATGTAACATAAGCAATAAAGTAATGATACAGACTGT
chr1	Pdcd6	+	28982188	3UTR	AATAAA	-0.00548561	0.900773	1	N	Not Sig	ncbiRefSeq	programmed cell death 6 [Source:RGD Symbol;Acc:1311239]	GGACCAAGTCTATGTATGAAGAACAGGTCGTGTAGCATAAACAATAAAGTGTTGATACAG
chr1	Pde10a	-	51765742	unassigned	CATAAA	-0.241137	0.499342	1	N	Not Sig	ncbiRefSeq	phosphodiesterase 10A [Source:RGD Symbol;Acc:68434]	TGGACAGCTTCCCTGGGCATCTGTCGCCTTCCCCATAAATGAGAGCAAACTTGAGAGATG
chr1	Pde2a	+	155915432	3UTR	AATAAA	-0.221497	0.715558	1	N	Not Sig	ncbiRefSeq	phosphodiesterase 2A [Source:RGD Symbol;Acc:620965]	TTGTATGTGGTCCCGTGGGCTGAGTGCTTTGTACATGAGAATAAATCTATTTCTTTCTAC
chr1	Pde3b	+	168770077	intron	AATAAA	-0.756066	0.435313	1	N	Not Sig	ncbiRefSeq	phosphodiesterase 3B [Source:RGD Symbol;Acc:61943]	CATGATTTGTAAACTGGTTCCAGCATCTATTACTAAGTAATAAAATTTTAACTGATAATC
chr1	Pde7b	-	15179710	intron	none	0.266375	0.370589	1	N	Not Sig	ncbiRefSeq	phosphodiesterase 7B [Source:RGD Symbol;Acc:621016]	AACATTCCCATCTGGTTGGCTGGCGACGTGTTACTTGGAGAGAATCAGGATATTTTTATA
chr1	Pde8a	+	135288985	3UTR	ATTAAA	-0.0890727	0.892979	1	N	Not Sig	ncbiRefSeq	phosphodiesterase 8A [Source:RGD Symbol;Acc:735125]	GTTTCATTTTAAACTTGTATTTTTTTCTGGATGAAATTAAACTATTTGTTTTTAAGAAGT
chr1	Pdlim1	-	239042371	unassigned	none	-0.173931	0.752988	1	N	Not Sig	ncbiRefSeq	PDZ and LIM domain 1 [Source:RGD Symbol;Acc:68324]	CAGAGAGAAGTTCATGAGACAGGACACAGAGCACAGGCAGAGTGAACTAAGGGGCGGCAC
chr1	Pdzd7	-	243888294	3UTR	none	0.195427	0.891921	1	N	Not Sig	ncbiRefSeq	PDZ domain containing 7 [Source:RGD Symbol;Acc:1309882]	CATGTCCCAGCTCCGCAAGCCTCTTGTGGGCTGAGGGGGCTGAAGTCAGACCAAAGGAAG
chr1	Pdzd8	-	258449217	unassigned	AATAAA	-0.0641613	0.796155	1	N	Not Sig	ncbiRefSeq	PDZ domain containing 8 [Source:RGD Symbol;Acc:1308622]	GTATTCTTTTATAAACCATTTCATCAACACTGTGGCTAGAATAAAATAGGTAACGCTGTT
chr1	Pdzd8	-	258450345	3UTR	AATGAA	0.617558	0.225414	1	N	Not Sig	ncbiRefSeq	PDZ domain containing 8 [Source:RGD Symbol;Acc:1308622]	AGGTAATAATGCCAGAGAAGAACCAGTCACCTGTTTTAAATGTCATCAAATGAAGATATT
chr1	Pdzd9	-	175197638	intron	CATAAA	-0.141682	0.99566	1	N	Not Sig	ncbiRefSeq	PDZ domain containing 9 [Source:RGD Symbol;Acc:1560558]	AAGCAGCTTGGACTGCATAGTCTCAGGACCACCATAAAAGGAACACCAGGCATAAAGCTA
chr1	Pdzd9	-	175197978	3UTR	none	0.0854216	0.882087	1	N	Not Sig	ncbiRefSeq	PDZ domain containing 9 [Source:RGD Symbol;Acc:1560558]	AAACTCAAGGTACATGGTTTATCTACTTGGTGATGACATTTAACTCTCTGTGTTTTATTT
chr1	Pdzd9	-	175199174	CDS	none	0.00392596	0.904735	1	N	Not Sig	ncbiRefSeq	PDZ domain containing 9 [Source:RGD Symbol;Acc:1560558]	CGTCTTTGCCAACACTAATAGTATTGTCCTTCTTCTTATACCCATGCCATTCTGTGGAGA
chr1	Peg3	+	67124690	3UTR	AATAAA	-0.0340522	0.948656	1	N	Not Sig	ncbiRefSeq	paternally expressed 3 [Source:RGD Symbol;Acc:2323590]	TGGTTGTAGTTGTTCTATCTTGTAATAGTGTCAACAATAAAAATAAAGTTAAAAATAAGA
chr1	Peli3	-	202230033	unassigned	ATTAAA	-0.728483	0.331493	1	N	Not Sig	ncbiRefSeq	pellino E3 ubiquitin protein ligase family member 3 [Source:RGD Symbol;Acc:1305989]	CACGATGCCATTTTATAATCTCAATAGGAGTGCACATTAAATGAAGTCCTTCACCAGCAG
chr1	Pepd	+	87681230	3UTR	AATAAA	-0.0847985	0.797246	1	N	Not Sig	ncbiRefSeq		TTCTTCCAAAAAAAAAAAATCAATATGCAAAATGGAATTTGAAATAAAAGCTTTTCTAAA
chr1	Perp	+	13554513	3UTR	AATAAA	0.00838235	1	1	N	Not Sig	ncbiRefSeq	p53 apoptosis effector related to PMP22 [Source:RGD Symbol;Acc:1310294]	AGTTGCAGCCAAGACAATTGCAGTTTTCATGACCAGCTTCCCCAATAAACCAGATGTTCA
chr1	Pex11a	-	133680090	unassigned	none	-0.0363888	0.89201	1	N	Not Sig	ncbiRefSeq	peroxisomal biogenesis factor 11 alpha [Source:RGD Symbol;Acc:619842]	CTGTGCCTAGTCATTCCTGAGCCCACAGACTCTGAAGCAGACACACTCACAGATGCATGA
chr1	Pex3	-	7912507	unassigned	AATAAA	-0.149044	0.57968	1	N	Not Sig	ncbiRefSeq	peroxisomal biogenesis factor 3 [Source:RGD Symbol;Acc:621636]	AAATCTTATTAAAGAACAAATAAATTAATGGCTAAAAAACTATTAACTAAACCAAACTAT
chr1	Pex3	-	7913115	3UTR	ATTAAA	0.00827481	0.96946	1	N	Not Sig	ncbiRefSeq	peroxisomal biogenesis factor 3 [Source:RGD Symbol;Acc:621636]	ACTGTGCTGAATTAAAAATACAGTAAGGTGCTAAATGAATCTACTTCATTATGAGATGAA
chr1	Pex3	-	7913274	CDS	AAGAAA	-0.199574	0.73577	1	N	Not Sig	ncbiRefSeq	peroxisomal biogenesis factor 3 [Source:RGD Symbol;Acc:621636]	ACTGTGGTTTTTCTTGAAAGAAAACAATCATTTCTCCAGTTGTTGGGGGGTGCTGAATGC
chr1	Pex7	-	14582697	unassigned	CATAAA	-0.431008	0.726992	1	N	Not Sig	ncbiRefSeq	peroxisomal biogenesis factor 7 [Source:RGD Symbol;Acc:1308483]	TGAATAGAAAAGTATATTCATACATTCAGTACATTTAAAAGGCAATCTCATAAATGATCT
chr1	Pgam1	+	240731442	3UTR	AATAAA	0.118788	0.672782	1	N	Not Sig	ncbiRefSeq	phosphoglycerate mutase 1 [Source:RGD Symbol;Acc:3312]	GGGCATAACAACTAAGTCTCTTTCCAGATCAGTATAATAAAGGAGTGATGTGCAATACTT
chr1	Pgap2	+	156618115	3UTR	AATAAA	0.519879	0.36155	1	N	Not Sig	ncbiRefSeq	post-GPI attachment to proteins 2 [Source:RGD Symbol;Acc:619744]	TCCCCATCTTTCATTTGTATATTTTATTTCAAAGGACAATAAATTTTTTTCTTTTGCCAA
chr1	Pgghg	+	196043908	CDS	none	1.47592	0.598935	1	N	Not Sig	ncbiRefSeq	protein-glucosylgalactosylhydroxylysine glucosidase [Source:RGD Symbol;Acc:1306015]	TTTCAATCTGGATCCTGCCCTCACCCAGCAAGTTTACAGTGTGTTCCCTCTGTCCCTTCC
chr1	Pgghg	+	196044560	3UTR	ATTAAA	0.912009	0.487909	1	N	Not Sig	ncbiRefSeq	protein-glucosylgalactosylhydroxylysine glucosidase [Source:RGD Symbol;Acc:1306015]	TGTGCCCCTATACCAAGCCAACTTGGCTAATTAAAGTCAGTGCTGGCAAAGGCTGAAGTC
chr1	Pgm2l1	+	154615181	3UTR	AATAAA	-0.183348	0.707769	1	N	Not Sig	ncbiRefSeq	phosphoglucomutase 2-like 1 [Source:RGD Symbol;Acc:1583226]	CCTGTTGCACAATAATGTTCTGTCTCCACAAAAAAATAAAAAAGAAAGAAAAGAAAAAAA
chr1	Pgm2l1	+	154620901	3UTR	AATAAA	-0.151996	0.685744	1	N	Not Sig	ncbiRefSeq	phosphoglucomutase 2-like 1 [Source:RGD Symbol;Acc:1583226]	TGGATTTCTGTGGTTTTAACCAAATGAAATGTTCTCAGTAATAAACAGGTCTCTCCATAG
chr1	Pgm5	-	222325637	unassigned	none	-0.0567548	1	1	N	Not Sig	ncbiRefSeq	phosphoglucomutase 5 [Source:RGD Symbol;Acc:1307969]	AGGTGACAACTGCTCGAATTGCAAAGCCGCAAGAGACACAAAGGAGCTGAGGTCCACAAT
chr1	Pgpep1l	-	121835242	3UTR	none	-0.0427867	0.662135	1	N	Not Sig	ncbiRefSeq	pyroglutamyl-peptidase I-like [Source:RGD Symbol;Acc:1561859]	TTTTCTTATTTTTAAAACTGTCCGAGTTGTTGGTGTCCTTTTGTTTTGCGTGGGTGTTTT
chr1	Pgpep1l	-	121835511	3UTR	AATGAA	0.742566	0.605861	1	N	Not Sig	ncbiRefSeq	pyroglutamyl-peptidase I-like [Source:RGD Symbol;Acc:1561859]	TTTTCTCCTTATGTGCTTCAAGTAATCTTTCCAAGCTGAGTTGTGGCCTTTTTCACGCAC
chr1	Phactr2	-	7591253	unassigned	AATAAA	-0.634677	0.492542	1	N	Not Sig	ncbiRefSeq	phosphatase and actin regulator 2 [Source:RGD Symbol;Acc:1303141]	ACAGAATAAAAAGACAACATTATCTGAAAAAAAAATAAGACAAACGACAAGAGACTAAAG
chr1	Phf10	-	55952248	3UTR	AATAAA	-0.0674454	0.86988	1	N	Not Sig	ncbiRefSeq	PHD finger protein 10 [Source:RGD Symbol;Acc:1305266]	GACTTTCTTTCAAGGGTAGAAGTTGCTAATAAAGAAATAAATCAACTGGATGTTTAAGGT
chr1	Phkg2	+	182196473	intron	none	0.0384203	0.973587	1	N	Not Sig	ncbiRefSeq	phosphorylase kinase catalytic subunit gamma 2 [Source:RGD Symbol;Acc:620024]	CTTTGAGCGCTGTAAAGGCAGCCAGCCCTGGAACCTCACACCTCGCCAGCGGTTCCGGGT
chr1	Phkg2	+	182197124	3UTR	AATAAA	0.0146252	0.934427	1	N	Not Sig	ncbiRefSeq	phosphorylase kinase catalytic subunit gamma 2 [Source:RGD Symbol;Acc:620024]	CCTTGCCATCACCGCCTGTGCTGCATCTGAAATAAAACCTGCTACAAGCCTGGGAGAGCC
chr1	Phlda2	-	198696896	unassigned	none	0.622761	0.451297	1	N	Not Sig	ncbiRefSeq	pleckstrin homology-like domain, family A, member 2 [Source:RGD Symbol;Acc:1304755]	CCGTTCAATTCCACCCTTCCACACATACGCCCCGGTAGGAACTACACGGACCACACAGTT
chr1	Phrf1	+	196366899	3UTR	none	-0.360484	0.708992	1	N	Not Sig	ncbiRefSeq	PHD and ring finger domains 1 [Source:RGD Symbol;Acc:708360]	TTATAGATACACTGTTTCCATTGTGGTCTAATTTATCAAAGATGGCTTATCTTTAGAAAT
chr1	Pi4k2a	+	240928306	3UTR	none	0.419337	0.355711	1	N	Not Sig	ncbiRefSeq	phosphatidylinositol 4-kinase type 2 alpha [Source:RGD Symbol;Acc:620485]	GGCAGCAGAAGTGTTTACACCCTATGCTGGGGACCCTTGAGCATTCTCACACACTGCAAT
chr1	Pi4k2a	+	240929105	3UTR	AACAAA	0.621321	0.0599888	1	N	Not Sig	ncbiRefSeq	phosphatidylinositol 4-kinase type 2 alpha [Source:RGD Symbol;Acc:620485]	AGAAATTGTATGTATTGTATTTAAATCATTGCAAATGTATGAATAACAAATTCAGTTCTG
chr1	Pi4k2a	+	240929234	3UTR	CATAAA	0.437015	0.398501	1	N	Not Sig	ncbiRefSeq	phosphatidylinositol 4-kinase type 2 alpha [Source:RGD Symbol;Acc:620485]	TGGAGTTACGGAGACTTGGCTCTTGAAAACTAAGTGTTTTCATAAAACATTGCAAAAGCT
chr1	Picalm	+	144137599	3UTR	none	0.124045	0.681738	1	N	Not Sig	ncbiRefSeq	phosphatidylinositol binding clathrin assembly protein [Source:RGD Symbol;Acc:621054]	ATGCAGCTTCCACAAAACATGTTATGGTATTCTGGTTTGAGGTGCATTCTCCTTTTTCCT
chr1	Picalm	+	144137719	3UTR	AATAAA	-0.60414	0.550456	1	N	Not Sig	ncbiRefSeq	phosphatidylinositol binding clathrin assembly protein [Source:RGD Symbol;Acc:621054]	AGGAAGTTATATCTGCTGGTCAAATAAAATGTAAAATTTGTTTTATTTAAACATACAAAA
chr1	Picalm	+	144138042	3UTR	TATAAA	-0.0112189	0.87844	1	N	Not Sig	ncbiRefSeq	phosphatidylinositol binding clathrin assembly protein [Source:RGD Symbol;Acc:621054]	TGTGTTTTTGTTAATGACTGATTTTCAAATTTCGCTATTATTAAAATGTTTCCATATAAA
chr1	Pih1d1	+	95645294	3UTR	AATAAA	0.144956	0.961597	1	N	Not Sig	ncbiRefSeq	PIH1 domain containing 1 [Source:RGD Symbol;Acc:1309809]	AAATGTGGAGAAGATACTGGTGTCTTCTCTCAGTGAAATAAACAGGTTTCCAGTTTTCTC
chr1	Pik3c2a	-	170577941	unassigned	none	-0.32818	0.724885	1	N	Not Sig	ncbiRefSeq	phosphatidylinositol-4-phosphate 3-kinase, catalytic subunit type 2 alpha [Source:RGD Symbol;Acc:1310389]	TTAATTTGTACTTCTCAGCTCTGTGAACTATGCCTAGAATGTGTGGCTAAGTGAACTTTC
chr1	Pip5k1b	-	221914156	intron	none	-0.041364	0.945885	1	N	Not Sig	ncbiRefSeq	phosphatidylinositol-4-phosphate 5-kinase type 1 beta [Source:RGD Symbol;Acc:1310914]	CACACACACACACACACACACACACGACTCTTAAGTCATTTGAATCAACGCATGACCAGA
chr1	Pitpnm1	+	201406034	CDS	none	0.163063	0.753159	1	N	Not Sig	ncbiRefSeq	phosphatidylinositol transfer protein, membrane-associated 1 [Source:RGD Symbol;Acc:1306710]	ATGGCCTCACCCATGACCCACTGCGACAGAAAGCTATGTTTCTGCAGAGCCTGGTGCAAG
chr1	Pitpnm1	+	201407522	3UTR	TATAAA	0.15122	0.64157	1	N	Not Sig	ncbiRefSeq	phosphatidylinositol transfer protein, membrane-associated 1 [Source:RGD Symbol;Acc:1306710]	TAGGGTCCAGCAGCTTTTCCAATGTGTGAACCTATAAAATTAAACTGCACTCTACCAAGG
chr1	Plaat3	+	204816294	3UTR	AAGAAA	0.259429	1	1	N	Not Sig	ncbiRefSeq	phospholipase A and acyltransferase 3 [Source:RGD Symbol;Acc:2829]	GCTCTCAAGAAACAAGAAACAGAAGCAGTGAGCTGAATGACTATCCAGCTTTAGGGCTCT
chr1	Plaat3	+	204816396	3UTR	AATAAA	0.0385666	0.926186	1	N	Not Sig	ncbiRefSeq	phospholipase A and acyltransferase 3 [Source:RGD Symbol;Acc:2829]	CTTTATAATTAGGTATATTTTCACAATATACAATAAACCACAAGAAGGGAATTTTCATGG
chr1	Plcb3	-	204143256	unassigned	none	0.456664	0.903971	1	N	Not Sig	ncbiRefSeq	phospholipase C beta 3 [Source:RGD Symbol;Acc:61993]	GCAAGGCAAGGCATGTGGGGCGGGGCGGCGCGGCAGCATGATCACTAGGGAACGTAGAAG
chr1	Pld3	-	82821862	unassigned	none	-0.121426	0.614759	1	N	Not Sig	ncbiRefSeq	phospholipase D family, member 3 [Source:RGD Symbol;Acc:1308248]	AGTTGTCACCACCGGAAGCCCATGCCCCGTCCCCAAAGGAACATACCATCTCATACCACT
chr1	Plekha1	+	185476817	CDS	none	-0.235729	0.630373	1	N	Not Sig	ncbiRefSeq	pleckstrin homology domain containing A1 [Source:RGD Symbol;Acc:1564153]	CCGCAGCCTCTCGCAGCCACTCTCTGGTCTCAAGCTATACCATGGAGAAGCGAGGATTTT
chr1	Plekha1	+	185479156	3UTR	AATAAA	-0.116997	0.622227	1	N	Not Sig	ncbiRefSeq	pleckstrin homology domain containing A1 [Source:RGD Symbol;Acc:1564153]	GTCCGGTTGGTTGAACACTGTACTGACTTGAGAATAAACTGCTCGCAATCCATTGTCACT
chr1	Plekha7	-	170364523	unassigned	AATAAA	0.0287818	0.889029	1	N	Not Sig	ncbiRefSeq	pleckstrin homology domain containing A7 [Source:RGD Symbol;Acc:1598216]	GCAGGGTAAGTGTGCACACTCCATAGTGAATAAACACAGCCAGCAAAAACCAGGACACAG
chr1	Plekha7	-	170374747	intron	ATTACA	-0.490993	0.871756	1	N	Not Sig	ncbiRefSeq	pleckstrin homology domain containing A7 [Source:RGD Symbol;Acc:1598216]	CCATATCAAACCAATGGAATGGTGTTTGGTTTTCCAATTACAGTTTGGAAGACTTAGACA
chr1	Plekhb1	-	154998797	intron	AACAAA	0.11662	0.874091	1	N	Not Sig	ncbiRefSeq	pleckstrin homology domain containing B1 [Source:RGD Symbol;Acc:621614]	GCTGGGTTACAGAATTTTCAGGAGGAAACAGATCCTGGAGGAACAAAACAAGCAAAGCCA
chr1	Plekhf1	-	90908637	3UTR	none	0.517275	0.368563	1	N	Not Sig	ncbiRefSeq	pleckstrin homology and FYVE domain containing 1 [Source:RGD Symbol;Acc:1310544]	ATGGTTTCTACCCTGGACTGAGCAGTGCCTGAAGCTAGGGTACTCTTAGCAACCAAACGG
chr1	Plekhg1	+	40434062	3UTR	none	-0.01673	1	1	N	Not Sig	ncbiRefSeq	pleckstrin homology and RhoGEF domain containing G1 [Source:RGD Symbol;Acc:1583676]	GACAGTAGCACCCACTTTTAGAATACCTTCTCCCCACATCCCAAGGAGTTCTATACTGTG
chr1	Plgrkt	-	227099004	unassigned	none	-0.0903182	0.838341	1	N	Not Sig	ncbiRefSeq	plasminogen receptor with a C-terminal lysine [Source:RGD Symbol;Acc:1306839]	GAGAGATGAAGACCGGGTAGAGATTCTGTCTGACAGGACCTGAAGCAGCAAGACATGGGT
chr1	Plpp4	+	183959319	3UTR	AATAAA	-0.205183	0.874051	1	N	Not Sig	ncbiRefSeq	phospholipid phosphatase 4 [Source:RGD Symbol;Acc:1306289]	GCTGTAGCACCCACCCTCCTGTGTTCATGTTGTGAAACATAATAAAGTCCCACCTAGAAG
chr1	Plpp6	+	226681952	3UTR	AATAAA	-0.557237	0.356969	1	N	Not Sig	ncbiRefSeq	phospholipid phosphatase 6 [Source:RGD Symbol;Acc:1566000]	AATTGTACAATGACGGATACCTTTTAAAAAATATCAAAATAAATTAACTGGTAATGTTAA
chr1	Pnkp	+	95346637	3UTR	AATAAA	0.307608	0.734423	1	N	Not Sig	ncbiRefSeq	polynucleotide kinase 3'-phosphatase [Source:RGD Symbol;Acc:1303331]	GACTATACTGCCAGTTTTCCGAGGGCTGAGTCCTCAATAAACACTGCTGCTACTCTGCTC
chr1	Pnkp	+	95346921	3UTR	ATTAAA	0.628615	0.427038	1	N	Not Sig	ncbiRefSeq	polynucleotide kinase 3'-phosphatase [Source:RGD Symbol;Acc:1303331]	GTTTGACCAGGTACAGGAGATTGTAACAATTAAAAGAAAGGCTGTAGTGTGGGTACCTGT
chr1	Pnlip	+	257811655	3UTR	AATAAA	1.2259	0.733178	1	N	Not Sig	ncbiRefSeq	pancreatic lipase [Source:RGD Symbol;Acc:3360]	AGAAGGCTGCTGATGTGTGACCACCAAGTCCCACTGTAATAAAGTCTAGTATCAAAGCCA
chr1	Pnma8a	+	77642263	3UTR	none	-0.494027	0.3892	1	N	Not Sig	ncbiRefSeq	PNMA family member 8A [Source:RGD Symbol;Acc:1310803]	GTTCTTCATTGTTTGCCCTCCAGCAGCCTAAATGGAATTGAGGTCCCGAGAGTTAGTTCT
chr1	Pnma8a	+	77642780	3UTR	ATTAAA	0.902518	0.121241	1	N	Not Sig	ncbiRefSeq	PNMA family member 8A [Source:RGD Symbol;Acc:1310803]	CTCTGAATTTAGTGCCATTAAATCTGACCATGCTGCCCTGTCTCATTCTATGTGCCTGTG
chr1	Pnma8a	+	77643026	3UTR	AATAAA	-0.398512	0.456647	1	N	Not Sig	ncbiRefSeq	PNMA family member 8A [Source:RGD Symbol;Acc:1310803]	TATTCCGTGGCACGAGCATGGCCCTATAAATAAATATAATTAAAAAATTATGTGTGAAAG
chr1	Pnma8a	+	77643155	3UTR	AATAAA	-0.0694641	0.978107	1	N	Not Sig	ncbiRefSeq	PNMA family member 8A [Source:RGD Symbol;Acc:1310803]	TCAAGGCCAACTTGGGCTACAGAATAAGATCCTATCTCAAAATAAATAAGTAAATAAAAA
chr1	Pnma8b	+	77626525	3UTR	AATGAA	-0.0831692	0.913968	1	N	Not Sig	ncbiRefSeq	PNMA family member 8B [Source:RGD Symbol;Acc:1560435]	TCGTGTGCTGTGTGATCCGGGATCCTCAAATGAAGCAATGAAGCATCTTAGTTGTTGATT
chr1	Pnma8c	+	77671529	3UTR	none	0.0587742	1	1	N	Not Sig	ncbiRefSeq	PNMA family member 8C [Source:RGD Symbol;Acc:41230706]	TAAATCCTAGGAATCATGACTTGTAGGGGAAAGGCACACTCTTTTCTAAAGAGAAAAAAA
chr1	Pnpla2	+	196557357	3UTR	none	-0.309708	0.926211	1	N	Not Sig	ncbiRefSeq	patatin-like phospholipase domain containing 2 [Source:RGD Symbol;Acc:1309044]	GGGAAACCTTTCACCAGCCACTCACAATGCTACTCCTGGTGGGGAGGGATGAGGAGTAAC
chr1	Pnpla2	+	196557529	3UTR	AATAAA	-0.167116	0.585992	1	N	Not Sig	ncbiRefSeq	patatin-like phospholipase domain containing 2 [Source:RGD Symbol;Acc:1309044]	GAATTATTTATTATTGCCAAAGCAGATATAATAAAAGCCACAGCTTAGCCTCGGCCGTCC
chr1	Pnpla2	+	196557803	3UTR	AATAAA	0.135876	0.838783	1	N	Not Sig	ncbiRefSeq	patatin-like phospholipase domain containing 2 [Source:RGD Symbol;Acc:1309044]	TTAAGGGTCAGTTTGGGAGTTTGAGACCCTTAGTATTAATAAAAACTAAAACGTTGGGCT
chr1	Pola2	-	203227182	unassigned	ATTAAA	0.0855195	1	1	N	Not Sig	ncbiRefSeq	DNA polymerase alpha 2, accessory subunit [Source:RGD Symbol;Acc:621817]	CTGGACATAGGTCAAGTAGACAACATTCCTAGGACACTACTCAGGAAAAAAAAGATTAAA
chr1	Pold3	-	154417892	unassigned	AATAGA	0.306147	0.732439	1	N	Not Sig	ncbiRefSeq	DNA polymerase delta 3, accessory subunit [Source:RGD Symbol;Acc:1312027]	CATTTAGATAACTGTGCTCCTGCCGCCTGGCTGTCAAGTAACAGACCCATCAGACATTCA
chr1	Pold3	-	154418082	3UTR	none	0.493511	0.350457	1	N	Not Sig	ncbiRefSeq	DNA polymerase delta 3, accessory subunit [Source:RGD Symbol;Acc:1312027]	GGTGGCACATTGGGTACAGAAATCGAAGATTTGCATTCTCCCTGTAAAGATACAACTCCA
chr1	Pold4	+	201528406	3UTR	AATAAA	-0.227994	0.570448	1	N	Not Sig	ncbiRefSeq	DNA polymerase delta 4, accessory subunit [Source:RGD Symbol;Acc:1308519]	TGGCTGAGTTCTTAATCAAAAAGTTCACTAATGCTTACAATAAAGTATATTAAGCCTGAA
chr1	Polg	-	133382763	intron	AATAAT	0.263464	0.721146	1	N	Not Sig	ncbiRefSeq	DNA polymerase gamma, catalytic subunit [Source:RGD Symbol;Acc:620057]	TGCCTTTGGCAGGATTCCATCTTAAGTTTGTTGAAGCTAGAAATAATATCAGTAGACAAG
chr1	Polg	-	133382989	3UTR	none	0.116434	0.735007	1	N	Not Sig	ncbiRefSeq	DNA polymerase gamma, catalytic subunit [Source:RGD Symbol;Acc:620057]	CAGGACTGGGGGTCTGAATCCCTGCCTGGGAGGCAGACAGGAAAAGCATGACTGATCCAG
chr1	Poll	-	244400201	unassigned	none	0.142412	0.766973	1	N	Not Sig	ncbiRefSeq	DNA polymerase lambda [Source:RGD Symbol;Acc:1308053]	TGGTCCTGCAGGAATGGAGGACAACAGGTGAGGTCAGCACAGCTCACAGACAGCAGGCAA
chr1	Polr1g	-	79007489	intron	AATGAA	-0.743118	0.455283	1	N	Not Sig	ncbiRefSeq	RNA polymerase I subunit G [Source:RGD Symbol;Acc:1591707]	CCCAGGATGCTCGGCCCCATCTCTCAAAAGTAAGACTTTTTGTTGGTTTGTTTTATTAAT
chr1	Polr1g	-	79007804	3UTR	AATAAG	0.996698	0.168645	1	N	Not Sig	ncbiRefSeq	RNA polymerase I subunit G [Source:RGD Symbol;Acc:1591707]	AGAAACCACACACCCAAAGCTCCTCGACAGGAGAATAAGAGGCGGAACCCCGCACCAAAC
chr1	Polr2g	-	205689159	unassigned	AATAAA	-0.000664896	0.931444	1	N	Not Sig	ncbiRefSeq	RNA polymerase II subunit G [Source:RGD Symbol;Acc:621284]	TCCCTCCAACCCAATAAATAAATATTAAAAAAAAAAAAAAGCACAAAACCAAACCAAAAG
chr1	Polr2g	-	205689307	3UTR	AAGAAA	0.0313557	0.995336	1	N	Not Sig	ncbiRefSeq	RNA polymerase II subunit G [Source:RGD Symbol;Acc:621284]	AGAGAATAAGAGCACAGCTCAGCTGGAAGAAACAAAGTGTTCTGGGGACAAGGAGCCTTC
chr1	Polr2i	+	85484952	3UTR	AATAAA	0.0494047	0.958618	1	N	Not Sig	ncbiRefSeq	RNA polymerase II subunit I [Source:RGD Symbol;Acc:1309395]	CACCGCTGGACTGAGTGACCGTTCCTTCCTCCATTTGTAATAAATGCCCAGTTTCCACAC
chr1	Polr2l	-	196570050	unassigned	none	0.0702986	0.765096	1	N	Not Sig	ncbiRefSeq		GGAGGCAGGGAGGTAGCCTCAGAGACAGCATAGACGTGGATATAGAGAAAAGTCAGACCT
chr1	Polr3e	+	175487176	CDS	none	-1.1955	0.635167	1	N	Not Sig	ncbiRefSeq	RNA polymerase III subunit E [Source:RGD Symbol;Acc:1308086]	AAGGACTTTCTGGAACACATGGCTGTAGTGAGGATCAACAGAGGCTGGGAGTTCTTACTG
chr1	Polr3e	+	175494256	3UTR	AATAAA	-1.78046	0.0654386	1	N	Not Sig	ncbiRefSeq	RNA polymerase III subunit E [Source:RGD Symbol;Acc:1308086]	TTGATGTAAAAAAAATTATATTTTGTGTATTTTTAAAATAAATGCTAACACTAAACTGGC
chr1	Polr3e	+	175494678	3UTR	AATAAA	0.0846201	0.888966	1	N	Not Sig	ncbiRefSeq	RNA polymerase III subunit E [Source:RGD Symbol;Acc:1308086]	TTAATGTACTTCAGGCCCAAATATTTTAAATCAAAATGTAATAAAGGTTTTTTTTTACCT
chr1	Pop4	-	90960025	unassigned	none	-0.0162949	0.929958	1	N	Not Sig	ncbiRefSeq	POP4 homolog, ribonuclease P/MRP subunit [Source:RGD Symbol;Acc:1305955]	GGGAGCCACACACAACCCCCTTCCCTTTCAACCCATAAGTACTGGAGTTTGAAGCCATTT
chr1	Ppfia1	-	199641276	unassigned	none	0.343569	0.57668	1	N	Not Sig	ncbiRefSeq	PTPRF interacting protein alpha 1 [Source:RGD Symbol;Acc:1309009]	ATCCCTCACTGTGCCATCCTTTGGCAGAGCTTAAGGCAGCGGACGCTCGTTCACAGCATT
chr1	Ppfia3	-	95817109	unassigned	AACAAA	0.157803	0.629897	1	N	Not Sig	ncbiRefSeq	PTPRF interacting protein alpha 3 [Source:RGD Symbol;Acc:620054]	AAGACGGACAGTCTCGACTCCTTGCTCTGGAGGTTAACATCTTAAGAACAAAAACTGGGA
chr1	Ppfibp2	+	161650343	3UTR	AATAAA	0.23298	0.786279	1	N	Not Sig	ncbiRefSeq	PPFIA binding protein 2 [Source:RGD Symbol;Acc:1565383]	TGATTGTACCTTACTATAGGGTGGCCACTTCTTTCTGATAATAAAAACAGTATTTATATA
chr1	Ppfibp2	+	161660011	CDS	none	-1.36679	0.010372	0.472737	N	Not Sig	ncbiRefSeq	PPFIA binding protein 2 [Source:RGD Symbol;Acc:1565383]	TCCAAGTACTGAGTCATCTTTCCTCCTTCAGGATACTTAGGGTGCACATTTTTGAAGTAG
chr1	Ppil4	+	2305636	3UTR	AGTAAA	1.27294	2.24564e-06	0.000437129	Y	FDR<0.05	ncbiRefSeq	peptidylprolyl isomerase like 4 [Source:RGD Symbol;Acc:1311051]	GGGTGTAGTATGTTTGATATATGTTCATACTCTGAAGCAAGTAAATCCATATTACAAACA
chr1	Ppil4	+	2305639	3UTR	AGTAAA	-0.878205	0.0161626	0.631862	N	Not Sig	ncbiRefSeq	peptidylprolyl isomerase like 4 [Source:RGD Symbol;Acc:1311051]	TGTAGTATGTTTGATATATGTTCATACTCTGAAGCAAGTAAATCCATATTACAAACAGCT
chr1	Ppil4	+	2306210	3UTR	GATAAA	0.169056	0.930054	1	N	Not Sig	ncbiRefSeq	peptidylprolyl isomerase like 4 [Source:RGD Symbol;Acc:1311051]	AAGTTCATCCATGTTGCAAATGATAGTTTCCTTCCTAAAGGATAAACAATATCCTGTTGT
chr1	Ppme1	-	154668098	unassigned	AATAAA	0.0585109	0.940317	1	N	Not Sig	ncbiRefSeq	protein phosphatase methylesterase 1 [Source:RGD Symbol;Acc:1309683]	CAACTAACTAATAAACTGTTCCTAGCCAGATCAGCAAAGTAAGGACAGCTCCTCAGACGA
chr1	Ppp1ca	+	201488732	3UTR	AATAAA	0.0556155	0.89244	1	N	Not Sig	ncbiRefSeq	protein phosphatase 1 catalytic subunit alpha [Source:RGD Symbol;Acc:3375]	CTGGCAGCCAGATCCTGGGGCAACCCATCTGGTCTCTTGAATAAAGGTCAAAGCTGGATT
chr1	Ppp1r12c	+	69343200	3UTR	AATAAA	-0.290205	0.749109	1	N	Not Sig	ncbiRefSeq	protein phosphatase 1, regulatory subunit 12C [Source:RGD Symbol;Acc:1584883]	GAGAAGGTATTTTTGAGACAAAGCACAGGCACCATAAATAAAGTCGTGACATTGCCACTC
chr1	Ppp1r13l	+	79030713	3UTR	AATAAA	0.0314567	0.935342	1	N	Not Sig	ncbiRefSeq	protein phosphatase 1, regulatory subunit 13 like [Source:RGD Symbol;Acc:1593681]	CTTACTGTTTATAATGACGCGGAAACTGTTTCCTTTATAAATAAAGGTCGTTTGCCCAGC
chr1	Ppp1r14a	+	84590525	intron	none	-1.2959	0.360161	1	N	Not Sig	ncbiRefSeq	protein phosphatase 1, regulatory (inhibitor) subunit 14A [Source:RGD Symbol;Acc:620536]	TTGCCCAAAGAGACACAGGCCTAGGGGTGTAGGAGGCCTCCCCCCTGCTCTGTTCTCAGA
chr1	Ppp1r14a	+	84590741	3UTR	none	0.0132663	1	1	N	Not Sig	ncbiRefSeq	protein phosphatase 1, regulatory (inhibitor) subunit 14A [Source:RGD Symbol;Acc:620536]	CCTCTGCTCCACCCCCAAAGCCCAGATTGTTTCTAAGTTGTATTTAATGGTTCCGTAACT
chr1	Ppp1r14b	+	204167319	3UTR	AATAAA	-0.349706	0.817783	1	N	Not Sig	ncbiRefSeq	protein phosphatase 1, regulatory (inhibitor) subunit 14B [Source:RGD Symbol;Acc:628702]	TATTGACTCTGCGGCGCAGGCCCTTTGAAAATAAAGCTAGGATACAGCCTTTGGAGCAGC
chr1	Ppp1r14c	+	39886738	3UTR	AATAAA	0.518065	0.35844	1	N	Not Sig	ncbiRefSeq	protein phosphatase 1, regulatory (inhibitor) subunit 14c [Source:RGD Symbol;Acc:620538]	TAATGTTTACCAATGATTTATTTACAAGCTATTTACTCAAATAAAGGGAGCTGCTTACAA
chr1	Ppp1r14c	+	39886967	3UTR	AATAAA	-0.91089	0.324371	1	N	Not Sig	ncbiRefSeq	protein phosphatase 1, regulatory (inhibitor) subunit 14c [Source:RGD Symbol;Acc:620538]	ATTAATAAAGAGACAAAAGTGTACTCACACAAAATAAATAAAATCTTTGTAAAAAAAAAA
chr1	Ppp1r15a	-	96000052	unassigned	AATAAG	3.66306	2.40971e-09	7.63223e-07	Y	FDR<0.05	ncbiRefSeq	protein phosphatase 1, regulatory subunit 15A [Source:RGD Symbol;Acc:621526]	TATCAATAAGTACACACATATTTAGCCTCCCTTAAGCTATCAATAAGTACACACTTAGAG
chr1	Ppp1r32	-	207113806	unassigned	none	-0.107695	1	1	N	Not Sig	ncbiRefSeq	protein phosphatase 1, regulatory subunit 32 [Source:RGD Symbol;Acc:708532]	CGATGCACTCTAGCTCACCCCTTACCCCAGCACCACCCTGCCTGACAATGACTGGATACC
chr1	Ppp1r3c	-	234460957	unassigned	AAGAAA	0.075275	0.885243	1	N	Not Sig	ncbiRefSeq	protein phosphatase 1, regulatory subunit 3C [Source:RGD Symbol;Acc:1309132]	TTAGTTGCTATGTTTCTGATTTGACCAGTTACGGTTTGGGAAAAGAAAACATTCTCAGGT
chr1	Ppp2r1a	+	60559466	3UTR	AATAAA	0.0165293	0.865633	1	N	Not Sig	ncbiRefSeq	protein phosphatase 2 scaffold subunit A alpha [Source:RGD Symbol;Acc:620907]	ATTGTGCCATTTTTATTTTATTCCTTTCCCTACTCTTTACACAGAATAAAAATGTAGAAA
chr1	Ppp2r2d	+	193699950	3UTR	AATAAA	-0.398272	0.591893	1	N	Not Sig	ncbiRefSeq	protein phosphatase 2, regulatory subunit B, delta [Source:RGD Symbol;Acc:708356]	GAAAACCTACTTGAAGCTGAATTGGTGGACTCTGCTCAATAAAGGCCATTACTCAAATGT
chr1	Ppp2r2d	+	193700277	3UTR	AATAAA	-0.0837633	0.973456	1	N	Not Sig	ncbiRefSeq	protein phosphatase 2, regulatory subunit B, delta [Source:RGD Symbol;Acc:708356]	CACACCTTCTGTGGAGCTACTTAATAAACACAGCACACTGTGAAGTGTTTTTAAATCCAA
chr1	Ppp2r5b	-	203527267	3UTR	AATAAA	-0.0961492	0.897328	1	N	Not Sig	ncbiRefSeq	protein phosphatase 2, regulatory subunit B', beta [Source:RGD Symbol;Acc:727786]	TCCTCAGCAGTCTCACTGCTGCTTTCTCCTTCACCCCTGTCCTCAATAAAGCAGGCAGTG
chr1	Ppp2r5b	-	203529896	exon	none	0.43243	0.654391	1	N	Not Sig	ncbiRefSeq	protein phosphatase 2, regulatory subunit B', beta [Source:RGD Symbol;Acc:727786]	CCACTACTGTCAGGGTTGTGAGAACCCTTCATACCTCCTTCTGGGTGCAGGTTTTAGGCC
chr1	Ppp4c	-	181392898	unassigned	AATAGA	0.496802	0.282604	1	N	Not Sig	ncbiRefSeq	protein phosphatase 4, catalytic subunit [Source:RGD Symbol;Acc:621225]	ATCAGTGGACAAACAGATAAGTCTCTATGTCCACCCCAATCAAACCTGACAGAAACCCTA
chr1	Ppp5c	-	77690202	unassigned	none	0.327351	0.409552	1	N	Not Sig	ncbiRefSeq	protein phosphatase 5, catalytic subunit [Source:RGD Symbol;Acc:68415]	AAACTGCACCCACGCTGGAGGAGCCCGCACATGGTAGACACATGCCAATGTGGGTTTGAG
chr1	Ppp6r1	+	69217164	3UTR	AATAAA	0.15649	0.821971	1	N	Not Sig	ncbiRefSeq	protein phosphatase 6, regulatory subunit 1 [Source:RGD Symbol;Acc:1311409]	AGTAATGTGTGCAGAGCTGGTGTTTCATACTGCAAATATAAATAAAGGAAGATAGCAGAA
chr1	Ppp6r3	-	200693124	intron	none	-0.601809	0.375457	1	N	Not Sig	ncbiRefSeq	protein phosphatase 6, regulatory subunit 3 [Source:RGD Symbol;Acc:1307145]	AGGACGACTCTTGGCACAGGCTCACAATGTGGCTACTAGAACCCCAAAAAGGCTCAGGAG
chr1	Pprc1	+	244918474	3UTR	AATAAA	0.588383	0.614914	1	N	Not Sig	ncbiRefSeq	PPARG related coactivator 1 [Source:RGD Symbol;Acc:1309688]	TAGTGTGGAAAGACTTTTATAAGGAAATGAAAAAAAGTTAAATAAAAATATGTTAAATCG
chr1	Pprc1	+	244918583	3UTR	AATAAA	0.0135364	1	1	N	Not Sig	ncbiRefSeq	PPARG related coactivator 1 [Source:RGD Symbol;Acc:1309688]	ACTTGGCTTTATATGTAAGGTGGGTCTGAGGGGAACATCTAATAAACATGAAGTAGAGGG
chr1	Prc1	+	134271763	3UTR	AATAAA	0.547825	0.805156	1	N	Not Sig	ncbiRefSeq	protein regulator of cytokinesis 1 [Source:RGD Symbol;Acc:1311754]	ACATATATATGTTGTTTTTAAACATATTAAAATAAAATGTATATAGTTAATCTTTCAAAT
chr1	Prcp	+	146983890	3UTR	AATAAA	-0.0853138	0.695253	1	N	Not Sig	ncbiRefSeq	prolylcarboxypeptidase [Source:RGD Symbol;Acc:1307842]	ACTGGACAAATTCTGTTAATAAAAATCCTTTAAAAATAGACAAATCTTCTATTGAAAAAG
chr1	Prdx3	-	260001641	unassigned	AATAAA	0.0115017	0.908825	1	N	Not Sig	ncbiRefSeq	peroxiredoxin 3 [Source:RGD Symbol;Acc:620040]	GAGCTAAGTCATCAAAGGAGGAGCAGTGCCCCAGAATAAATTGACAGTTAATGATGTCAA
chr1	Prdx5	-	204099825	unassigned	none	0.696522	0.0278912	0.911074	N	Not Sig	ncbiRefSeq	peroxiredoxin 5 [Source:RGD Symbol;Acc:71007]	ACTTCAGCTCTATCTATGGCTACCGGTGAGTAAGGGCGAAGCAGACGATTCCATGCCAGA
chr1	Prkcb	+	177163538	3UTR	ATTAAA	-0.0808315	0.944121	1	N	Not Sig	ncbiRefSeq	protein kinase C, beta [Source:RGD Symbol;Acc:3396]	TCTCTTGGAGGAAACTTTTTGTTTAAGAATTGGTATGATTAAACTGAATTCATATATGCA
chr1	Prkcg	-	65832850	unassigned	none	-0.0587802	0.916469	1	N	Not Sig	ncbiRefSeq	protein kinase C, gamma [Source:RGD Symbol;Acc:3397]	ACAGCCAGCCCACCTCCGCACCCACTTCATCCCCCAAACTTTACGAGAAAACATCCAAAC
chr1	Prkd2	+	77542385	3UTR	AATAAA	0.349634	0.718269	1	N	Not Sig	ncbiRefSeq	protein kinase D2 [Source:RGD Symbol;Acc:1308054]	GACCACCACATGTGCACACACAAACACAGACAATAAATGTATTTTCTTTTTTAACAAATG
chr1	Prkn	-	48688650	unassigned	none	0.378875	0.433275	1	N	Not Sig	ncbiRefSeq	parkin RBR E3 ubiquitin protein ligase [Source:RGD Symbol;Acc:61797]	GGAATGTGGCCAAAGTTCCCTCCCACATCTCCAAAATTTATCAGAAATGCATCCCCAAGG
chr1	Prkn	-	49303858	intron	CATAAA	-0.410941	0.826313	1	N	Not Sig	ncbiRefSeq	parkin RBR E3 ubiquitin protein ligase [Source:RGD Symbol;Acc:61797]	TCTGTATATAACACAATTACACATATTCATACATATGCATAAATGATACTTAAGAATTTT
chr1	Prlhr	-	259606703	unassigned	AAGAAA	0.982258	0.898728	1	N	Not Sig	ncbiRefSeq	prolactin releasing hormone receptor [Source:RGD Symbol;Acc:71037]	TAAATTCCACTCACAATGTACGCAGAGAAAAAAGAAGAAAGAAAGAAAGAAAGAAAGAAA
chr1	Prmt1	-	95458852	unassigned	none	0.233528	0.627567	1	N	Not Sig	ncbiRefSeq	protein arginine methyltransferase 1 [Source:RGD Symbol;Acc:62020]	TGGACAGTCCTCAGGGAGTGACAGGCTGCTGAACTACCCCAGCCCCCAGGGCAAGAAGTG
chr1	Prmt1	-	95458965	3UTR	none	-0.631366	1	1	N	Not Sig	ncbiRefSeq	protein arginine methyltransferase 1 [Source:RGD Symbol;Acc:62020]	TTATGAAAAACACTGCCACGATGTACCCTCCCATCCCCCAAGCCCAGCCCCTGAGCCCCC
chr1	Prmt3	+	99579441	3UTR	AATAAA	0.227306	0.757201	1	N	Not Sig	ncbiRefSeq	protein arginine methyltransferase 3 [Source:RGD Symbol;Acc:620413]	TGATATTCAGGTTGAAAAAATGAAAAATATCCAATAAAATGTGTAACTATTGAAATAGTA
chr1	Prmt3	+	99581772	3UTR	AAGAAA	-0.0508362	0.881801	1	N	Not Sig	ncbiRefSeq	protein arginine methyltransferase 3 [Source:RGD Symbol;Acc:620413]	CTAGGAAGCGCAAGGCCCTGGGTTCGGTCCCCAGCTCCGGAAAAAAAAAGAACCAAAAAA
chr1	Prodh2	+	85767164	3UTR	AATAAA	-0.289806	0.870993	1	N	Not Sig	ncbiRefSeq	proline dehydrogenase 2 [Source:RGD Symbol;Acc:1306761]	CTAAGGTTTCTCCGTCAGCACCATCAGGGGCCGTGTGCTCAATAAAGGTCCTTAGCCCTG
chr1	Proser3	-	85793362	intron	none	0.363065	0.556125	1	N	Not Sig	ncbiRefSeq	proline and serine rich 3 [Source:RGD Symbol;Acc:1565712]	TCTCACTGAGCTTGGCAGGTGCAGGCTTGTGTGCACCATCCCCAGCATAATGGCTCTTTT
chr1	Prpf19	+	207552662	3UTR	ATTAAA	0.0983533	0.578604	1	N	Not Sig	ncbiRefSeq	pre-mRNA processing factor 19 [Source:RGD Symbol;Acc:708496]	TCTTGCAGGTTTTTGTAAGCAGTGATCTAGTTTCATTAAAAAAAAAAAGCCACACAGTAA
chr1	Prpf31	-	65575886	unassigned	none	-4.0905	0.00135646	0.106394	N	Not Sig	ncbiRefSeq	pre-mRNA processing factor 31 [Source:RGD Symbol;Acc:1305832]	CCAGCAACCATTCTCCCTCACCTACACAACTACAGATTCATAACACACCAAACACAGTTC
chr1	Prpf31	-	65576377	3UTR	CATAAA	0.0937863	0.939583	1	N	Not Sig	ncbiRefSeq	pre-mRNA processing factor 31 [Source:RGD Symbol;Acc:1305832]	ACTCTGGAAGCCCCACAGCTCTGAGTCCTCTGGTTCTTTCATAAACAAATCATACCCTCT
chr1	Prr12	-	95510014	unassigned	AACAAA	-0.443388	0.700191	1	N	Not Sig	ncbiRefSeq	proline rich 12 [Source:RGD Symbol;Acc:1309896]	TCCCCCTGGGCAGCCTGTCCACCCCAACCCTCGATCTTGACAAACCATAACAAAATTCAT
chr1	Prr12	-	95510163	3UTR	none	-0.71892	0.399261	1	N	Not Sig	ncbiRefSeq	proline rich 12 [Source:RGD Symbol;Acc:1309896]	ATCCTTGCTCCCACTGCCCAGGCCCACCCACCGCCGCAGACAGAGCACTCCAGCCTGCTG
chr1	Prr14	+	182089330	3UTR	TATAAA	0.0313311	1	1	N	Not Sig	ncbiRefSeq	proline rich 14 [Source:RGD Symbol;Acc:1594592]	CTCTGAATCAATTGTATTTTTTTCTCTATATTTCTATAAAGTTTTCAATATATGTTTCTG
chr1	Prr18	-	52400214	unassigned	none	0.178553	0.567537	1	N	Not Sig	ncbiRefSeq	proline rich 18 [Source:RGD Symbol;Acc:1564079]	TGTTCAAAGATTCCTTTCTGGACAGTTATCCATTATCTTCTCCAAGAAGCAGCACACAGC
chr1	Prrg2	-	95534275	unassigned	none	0.708671	0.376044	1	N	Not Sig	ncbiRefSeq	proline rich and Gla domain 2 [Source:RGD Symbol;Acc:1305444]	GCACAGCACCGGTACCCAGATATTCTGCTCCACCGCGCGTAAATGCGCCCAGTAAGGGGG
chr1	Prrt2	-	181625242	unassigned	none	0.34569	0.24652	1	N	Not Sig	ncbiRefSeq	proline-rich transmembrane protein 2 [Source:RGD Symbol;Acc:1564195]	CGTTCACTAGGGCCTGCCAGAAAGCAGTACCTTGACTCTGCAAACCAACACAGGGACCAA
chr1	Prss23	-	143402724	unassigned	none	0.207344	0.604093	1	N	Not Sig	ncbiRefSeq	serine protease 23 [Source:RGD Symbol;Acc:1359545]	CCTGGTGTGACAGCAAGGTTTGCAGAGCTGTATACAGACTTCCCACAAAGCAGACCAGAA
chr1	Prss36	-	182543084	unassigned	none	-0.970632	0.382066	1	N	Not Sig	ncbiRefSeq	serine protease 36 [Source:RGD Symbol;Acc:1593186]	TCCCCTTAGCTCTGAGGTGTTCAGCACCTCTGTAGCCTAAGAGATACCACAAAGCCACGT
chr1	Prss53	-	182494943	3UTR	AACAAA	-0.124467	0.827043	1	N	Not Sig	ncbiRefSeq	serine protease 53 [Source:RGD Symbol;Acc:1566127]	AAGTTTTAAAAAAGGAAAATTGCTCTCCAACACCCCCCCCCCAAAGGAAAAAAAAAACAA
chr1	Prss53	-	182495491	intron	AAGAAA	0.200426	1	1	N	Not Sig	ncbiRefSeq	serine protease 53 [Source:RGD Symbol;Acc:1566127]	CTAGATGGGTGCATAGGGTCTCCCCTAGATGGGAACCAAGGCTAAAGAAGAGGGAACGTA
chr1	Prss8	-	182536228	intron	AATAAG	-2.89568	0.000627222	0.0583129	Y	Not Sig	ncbiRefSeq	serine protease 8 [Source:RGD Symbol;Acc:619973]	TGTGTTTTGGCAGGGTAGAATAAGAACCAAGGCCTCTTTTTTTTTTTTTTTTTTTTTTTT
chr1	Prss8	-	182536444	3UTR	none	0.475909	0.345903	1	N	Not Sig	ncbiRefSeq	serine protease 8 [Source:RGD Symbol;Acc:619973]	GGTGTAAGCAGACTTGGCCCAGAGGTCCTGCTGACCTCTCATTCCTCTTTCCTCCCACAG
chr1	Prune2	+	214572374	CDS	none	0.153841	0.941493	1	N	Not Sig	ncbiRefSeq	prune homolog 2 with BCH domain [Source:RGD Symbol;Acc:1311350]	GGAATGGATATCCACTTCGAGGAGGGAGTGTTGAGTCCCAGTGCCACAGACATGAGGCCG
chr1	Prune2	+	214599028	intron	AAGAAA	0.0964813	1	1	N	Not Sig	ncbiRefSeq	prune homolog 2 with BCH domain [Source:RGD Symbol;Acc:1311350]	GGCGGAAGATGCCAGGGCTAGGCTGGATGAAGAAATGCTACCAGATGATTGACAGACGGT
chr1	Prune2	+	214624848	3UTR	AATAAA	0.225388	0.599915	1	N	Not Sig	ncbiRefSeq	prune homolog 2 with BCH domain [Source:RGD Symbol;Acc:1311350]	CCCCTACTGTGTAACTCAAAAAATAAAAATAGATTCCACACACTGTGGTTTCCTTTTTCA
chr1	Psat1	-	213196708	unassigned	none	0.00863909	0.939172	1	N	Not Sig	ncbiRefSeq	phosphoserine aminotransferase 1 [Source:RGD Symbol;Acc:735170]	CGTCGGAATGTTTAAAGGCAGCATGACTGAAAAAGCGAGCAGAATCATTCGCAGGCAACC
chr1	Psat1	-	213196829	3UTR	none	0.529636	0.92074	1	N	Not Sig	ncbiRefSeq	phosphoserine aminotransferase 1 [Source:RGD Symbol;Acc:735170]	ACAACCAGAAAAGACCTCAGCAAAGATCTGGAATGTACAGATTGCCCTGGTTAAACTACA
chr1	Psd	-	245173278	unassigned	none	0.129858	0.582992	1	N	Not Sig	ncbiRefSeq	pleckstrin and Sec7 domain containing [Source:RGD Symbol;Acc:620297]	TACGGCAACCCCAATGTCACGCCAGTCCCTGTCCCCGAGCAAGAACAGAGGAGGCCCAAG
chr1	Psenen	-	85814904	unassigned	none	0.0479507	0.90445	1	N	Not Sig	ncbiRefSeq	presenilin enhancer gamma secretase subunit [Source:RGD Symbol;Acc:1312037]	GCTTTTATGTGCTGGCAATCACTTTATGCGTCTGCCTCCAAAAGATCCCAAGAACTCAGT
chr1	Psma1	-	168442420	unassigned	AACAAA	0.00265735	0.9409	1	N	Not Sig	ncbiRefSeq	proteasome 20S subunit alpha 1 [Source:RGD Symbol;Acc:61841]	TGACCATTGTAATATTAGCTTCCATCTACAGTCGAAACTACTTAAAAACAAAAACTTGAC
chr1	Psmb1	-	56442431	unassigned	AATAAA	0.0866902	0.862966	1	N	Not Sig	ncbiRefSeq	proteasome 20S subunit beta 1 [Source:RGD Symbol;Acc:621092]	ATAAACACACACATAATGAAAAGTTAATTTCAAAATAAATTAATATATCCAGACAAAGAA
chr1	Psmb1	-	56442678	3UTR	AAGAAA	0.0279491	1	1	N	Not Sig	ncbiRefSeq	proteasome 20S subunit beta 1 [Source:RGD Symbol;Acc:621092]	CCCAAGGGAGAAATTCTTCACAATCTGTCATGCTTAGAGAAGACACGGTGTAAGAAAACG
chr1	Psmc4	-	83349126	unassigned	none	0.0066665	0.921486	1	N	Not Sig	ncbiRefSeq	proteasome 26S subunit, ATPase 4 [Source:RGD Symbol;Acc:621102]	GGCCCAGAGCATCCTATTCAACGTCCATATTCCCTAAAGGAGTTAAACACCTAAGAAGAA
chr1	Psmd13	+	195976895	3UTR	AATAAA	0.0401287	0.99571	1	N	Not Sig	ncbiRefSeq	proteasome 26S subunit, non-ATPase 13 [Source:RGD Symbol;Acc:1305236]	TGGACCTTTCCAGTGTGGTCTGAGAGTGCTTCTATAATAAATGCCTTTGCATTGTTCTGT
chr1	Psmd8	-	84474376	unassigned	none	0.128323	0.689773	1	N	Not Sig	ncbiRefSeq	proteasome 26S subunit, non-ATPase 8 [Source:RGD Symbol;Acc:1309842]	GTCTAAGTTACAATCCTGGCTCAAGGAGAGGCCAGAATGGATATACCCAGATATATCCAC
chr1	Psmd8	-	84474705	3UTR	none	0.219158	0.763209	1	N	Not Sig	ncbiRefSeq	proteasome 26S subunit, non-ATPase 8 [Source:RGD Symbol;Acc:1309842]	CACTCACCCAGAAGGCCCAGAGGCCCCCAAACTCCCAAATTCTTATCTCCACCATCCCAC
chr1	Pstk	+	186168144	3UTR	ATTAAA	-0.0344577	0.934429	1	N	Not Sig	ncbiRefSeq	phosphoseryl-tRNA kinase [Source:RGD Symbol;Acc:1564300]	AGATACCATTGTGCAGAAGTATTTTTCAAAGCAACATTAAACTTTCTGAATTTCTAGTAA
chr1	Ptar1	+	221326859	3UTR	none	-0.447089	0.761169	1	N	Not Sig	ncbiRefSeq	protein prenyltransferase alpha subunit repeat containing 1 [Source:RGD Symbol;Acc:708369]	CGTCCATACTTGGGCTTCTCGTTTGGCTCTTGTGATTGGCTCCCATACTTATTCACCGCA
chr1	Ptdss2	+	196265963	3UTR	AATAAA	0.158813	0.66221	1	N	Not Sig	ncbiRefSeq	phosphatidylserine synthase 2 [Source:RGD Symbol;Acc:1307914]	GCTCCCTGCGTTTATAGTCGTACCCTTGAGCAAACAGAACAAATAAAGTAATGATGAAGG
chr1	Ptdss2	+	196267632	3UTR	ATTAAA	-0.272954	0.607669	1	N	Not Sig	ncbiRefSeq	phosphatidylserine synthase 2 [Source:RGD Symbol;Acc:1307914]	TGACCATTTAGTTTTCAGATAAAAGACACACAACTTTTATTAAAGTAAGCACTAAACAGC
chr1	Ptgdr2	+	207590273	3UTR	AATAAA	-0.183025	0.80833	1	N	Not Sig	ncbiRefSeq	prostaglandin D2 receptor 2 [Source:RGD Symbol;Acc:1311986]	TCCTTCTAGGAGCCTAGAGCTGTACTTATGGGGACACCAATAAACACCTCTGCGGTAGAG
chr1	Ptov1	-	95347066	exon	AACAAG	0.0625923	0.630047	1	N	Not Sig	ncbiRefSeq	PTOV1, extended AT-hook containing adaptor protein [Source:RGD Symbol;Acc:1306977]	TAACTTCAGGAAGTACGACCATCTTGCACTGAGCACAGAACAAGCATGGAGGGATAGCAT
chr1	Ptov1	-	95347375	3UTR	none	-0.0204366	0.902271	1	N	Not Sig	ncbiRefSeq	PTOV1, extended AT-hook containing adaptor protein [Source:RGD Symbol;Acc:1306977]	CATGCAGCAGGTCTAAGGCCAGGGTCACCCTGCTGCTTCCCACAAACACAAGTGCCGCTC
chr1	Ptpn5	-	97620637	unassigned	AGTAAA	0.407906	0.371948	1	N	Not Sig	ncbiRefSeq	protein tyrosine phosphatase, non-receptor type 5 [Source:RGD Symbol;Acc:3448]	GTGAGGCACAAAAGTCTAGGGTGTAAGGAGAGAACAGGAAATGACAGACCCAGGAGGCTA
chr1	Ptprcap	+	201451293	3UTR	AATAAA	2.03893	0.330649	1	N	Not Sig	ncbiRefSeq	protein tyrosine phosphatase, receptor type, C-associated protein [Source:RGD Symbol;Acc:1559601]	GTGCGCCCCAGATAGACACTGGACAGGTGATATACCGAAAATAAAACTTTGTAAGCAATG
chr1	Ptpre	+	190475920	CDS	none	0.10799	1	1	N	Not Sig	ncbiRefSeq	protein tyrosine phosphatase, receptor type, E [Source:RGD Symbol;Acc:620771]	ATCCACTCGGAACAGAAGGTTGACGTCTTCGAGTTTGTGTCTAGAATCCGCAATCAGCGC
chr1	Ptpre	+	190489557	3UTR	ATTAAA	-0.0542891	1	1	N	Not Sig	ncbiRefSeq	protein tyrosine phosphatase, receptor type, E [Source:RGD Symbol;Acc:620771]	ACCTGCTGTAAGATTATTAAATCATAAATGTCCTTTTTAAAAATTGGAATAACATGTTAA
chr1	Ptpre	+	190494815	3UTR	AATAAA	-0.696924	0.152767	1	N	Not Sig	ncbiRefSeq	protein tyrosine phosphatase, receptor type, E [Source:RGD Symbol;Acc:620771]	CAACAAAACGGGTGTTTCTCAGATGTTCACACAAAGATAAATAAAAGATATGTTCTACAA
chr1	Ptprk	-	16738895	unassigned	ATTAAA	-0.620037	0.602654	1	N	Not Sig	ncbiRefSeq	protein tyrosine phosphatase, receptor type, K [Source:RGD Symbol;Acc:619706]	CGTTTGCCTCTCCAATGTAAAAGCCTCCCACCCCCCCACATTAAAATCTCTCGGTGCAGG
chr1	Pum3	-	225074331	unassigned	ATTAAA	0.131795	0.917002	1	N	Not Sig	ncbiRefSeq	pumilio RNA-binding family member 3 [Source:RGD Symbol;Acc:1564753]	CATACCTCGAACTGTGTAGTACTCAGTCCGACAGATCAGACAGTTGACATTAAACCAAAT
chr1	Pvr	-	79561293	unassigned	AATATA	0.236575	0.799071	1	N	Not Sig	ncbiRefSeq	PVR cell adhesion molecule [Source:RGD Symbol;Acc:3813]	AAGTTTGAGGTCAGCCTGGGCTACAGGAAACACTGTCTCAAAAAATATATATTATAACTA
chr1	Pwwp2b	+	194049385	3UTR	AATAAG	-1.49624	0.724851	1	N	Not Sig	ncbiRefSeq	PWWP domain containing 2B [Source:RGD Symbol;Acc:1307108]	GGCCCCAGAAATAAGGGAGCTCTTGACCCAATTTGAAATGTAACTTTGGTTCCGGGAGCA
chr1	Pwwp2b	+	194059977	3UTR	AAGAAA	-0.501971	0.331806	1	N	Not Sig	ncbiRefSeq	PWWP domain containing 2B [Source:RGD Symbol;Acc:1307108]	AGGCCACATTCCTTTCCCCTCTGTCACTTCCAAGACCAAAAAGAAAACAGAAAGAAAAGA
chr1	Pygm	+	203705368	exon	AATAAA	-0.213801	0.618918	1	N	Not Sig	ncbiRefSeq	glycogen phosphorylase, muscle associated [Source:RGD Symbol;Acc:3461]	TGTATGGGGTCTAACCAAGTGCACCCACTCCCCAATAAATCGACTCTCCATGACCTTCCT
chr1	Pyroxd2	-	241523277	unassigned	none	0.0428954	1	1	N	Not Sig	ncbiRefSeq	pyridine nucleotide-disulphide oxidoreductase domain 2 [Source:RGD Symbol;Acc:1303232]	GGCAGGCCAGGCCTCCAATCAGTTGGTGGTGGGAAACCCCTGACAAGAAGGGAACAGTTG
chr1	Pyroxd2	-	241524400	CDS	none	-0.202897	0.876705	1	N	Not Sig	ncbiRefSeq	pyridine nucleotide-disulphide oxidoreductase domain 2 [Source:RGD Symbol;Acc:1303232]	CTCCCACAGAGGTATAGGCCTTGCACGGGGCATCTGTAGTCAGAGTGTTGGGGCACTGGT
chr1	Qk	+	50496033	intron	AATAAA	-0.108883	0.907478	1	N	Not Sig	ncbiRefSeq		TCCCATGTTGTTTGTAAATAGGATAATTGAAAAAGCAATAAACATTTATTGAACAAAAGA
chr1	Qk	+	50499655	3UTR	AATAAA	0.15615	0.685892	1	N	Not Sig	ncbiRefSeq		TTTGCTGTTTCTATTAACCCATAGCATTATTTTAATAAATGTTATAATACCAACCTACTA
chr1	Qk	+	50501568	3UTR	AGTAAA	-0.421899	0.766974	1	N	Not Sig	ncbiRefSeq		CTTTGGTGGAATGAAACACGTTGCCAAAGTTATCAGTTAAGTAAAGCTTATTTTCTGAAA
chr1	Qpctl	-	78786729	unassigned	none	0.0303324	1	1	N	Not Sig	ncbiRefSeq	glutaminyl-peptide cyclotransferase-like [Source:RGD Symbol;Acc:1308128]	CCATCCCTAGCAAGGTCCCGAAGCCTGAGAAAGACTTAGTGTTTCTTAAATGTCTCAAAA
chr1	Qpctl	-	78787905	3UTR	none	-0.173464	0.858031	1	N	Not Sig	ncbiRefSeq	glutaminyl-peptide cyclotransferase-like [Source:RGD Symbol;Acc:1308128]	CCCTGTGGTTTTCCTAGGGTATGTTTTCTAAGCAACTATGCATTCACCAAACTGGCGAAA
chr1	Qpctl	-	78788734	3UTR	AATAAA	0.0482999	0.963173	1	N	Not Sig	ncbiRefSeq	glutaminyl-peptide cyclotransferase-like [Source:RGD Symbol;Acc:1308128]	ACAGATATACACACAGGCAAAGCACAATTGCACATGAAATAAAAATAAAAGAAAGAAGCA
chr1	Qpctl	-	78788973	3UTR	AACAAA	0.0891927	0.928947	1	N	Not Sig	ncbiRefSeq	glutaminyl-peptide cyclotransferase-like [Source:RGD Symbol;Acc:1308128]	GATGAAGTTTCAGGACAGGCAGCACTACACAGAGAAACCCCGTATCAAAAACAAACAAGA
chr1	Qprt	-	181718188	unassigned	none	-0.438486	0.6604	1	N	Not Sig	ncbiRefSeq	quinolinate phosphoribosyltransferase [Source:RGD Symbol;Acc:1310309]	GTGTGTGTCTTAGGGTACACGAGCGGTGCTAATTTCTAGCATTTACCAACCACTCACAGT
chr1	R3hcc1l	+	241395239	3UTR	ATTAAA	-0.213002	0.63555	1	N	Not Sig	ncbiRefSeq	R3H domain and coiled-coil containing 1-like [Source:RGD Symbol;Acc:1307934]	CTCCAGTTTAATCAGTGATATGTTGTGAGAGGGAGAAATTAAAGGCTATTTTATAACATA
chr1	Rab1b	-	202405758	intron	none	0.478	0.322564	1	N	Not Sig	ncbiRefSeq	RAB1B, member RAS oncogene family [Source:RGD Symbol;Acc:1642882]	TCAGTTCCACCCAGCAACTCAAAGCTGACTCAGACCAAAGACCACACTCAGTCACCACAG
chr1	Rab30	+	146890411	3UTR	AATAAA	-0.165779	0.774886	1	N	Not Sig	ncbiRefSeq	RAB30, member RAS oncogene family [Source:RGD Symbol;Acc:1309507]	CGTTTTGGTACATTGATACCCTTAGATGTATTACCTAAAAATAAAAAGAGAATGGGGGAA
chr1	Rab30	+	146898369	3UTR	AATAAA	0.835554	0.254909	1	N	Not Sig	ncbiRefSeq	RAB30, member RAS oncogene family [Source:RGD Symbol;Acc:1309507]	TTGACTGGAAATTGATTTCCCATGTACTTGTACATAAATAAACATTTCCTGTTGCCCCCA
chr1	Rab32	-	4946192	unassigned	CATAAA	-0.289806	0.771311	1	N	Not Sig	ncbiRefSeq	RAB32, member RAS oncogene family [Source:RGD Symbol;Acc:1559997]	CGCACATAAAATAACTAAATCTAAAATTCAACAGCAAACCATTTTTTTATTATTATTTTT
chr1	Rab38	+	142262923	3UTR	AATAAA	0.464662	0.724759	1	N	Not Sig	ncbiRefSeq	RAB38, member RAS oncogene family [Source:RGD Symbol;Acc:628752]	TAAGATATATTATATATATTTTTCACAAGTGAAAAATAAAACATTAAAAGTGTTCTTTCC
chr1	Rab3il1	+	206679978	3UTR	AATAAA	0.453323	0.522414	1	N	Not Sig	ncbiRefSeq	RAB3A interacting protein-like 1 [Source:RGD Symbol;Acc:619764]	TCCTTCAAATGGAATGTAACACGATCTCTATTTAATAAAGGAAGGCTTTGTTGGTAGGGG
chr1	Rab3il1	+	206682716	3UTR	AATAAA	0.645669	0.744716	1	N	Not Sig	ncbiRefSeq	RAB3A interacting protein-like 1 [Source:RGD Symbol;Acc:619764]	TGCTAATATCCCTTGGAGAGCTTGCATAGAATCCTTTTAATAAATGACCATTAGTAAATT
chr1	Rab4b	-	82461395	unassigned	none	0.267789	0.355421	1	N	Not Sig	ncbiRefSeq	RAB4B, member RAS oncogene family [Source:RGD Symbol;Acc:620931]	ACTCATAACTTCCACTAGAGTCCGCTTCTGACTCCTCATCTCAGAATGACAGAGGCCGGA
chr1	Rab4b	-	82465230	intron	none	0.893656	0.601025	1	N	Not Sig	ncbiRefSeq	RAB4B, member RAS oncogene family [Source:RGD Symbol;Acc:620931]	AAGTCTTGGAGGCTGTCCTGTGTCCCACCCCTCGTTTGCCTCCTGAGCCCCTAGCATCCC
chr1	Rab6a	+	154996712	3UTR	AATAAA	0.0601605	0.983335	1	N	Not Sig	ncbiRefSeq	RAB6A, member RAS oncogene family [Source:RGD Symbol;Acc:619737]	GATTGACTCTTTTGTTTTATTTTGACATGGCATGTCCTGAAATAAATATCAATTCAATAT
chr1	Rab6a	+	154996958	3UTR	AATAAA	0.0624015	0.591559	1	N	Not Sig	ncbiRefSeq	RAB6A, member RAS oncogene family [Source:RGD Symbol;Acc:619737]	TAGATTTTTTTTTTTAACACAATTTTGCTGCCAAGTATATATAAATAAAACACAAAAGAA
chr1	Rab6a	+	154997091	3UTR	AATAAA	0.036666	0.731219	1	N	Not Sig	ncbiRefSeq	RAB6A, member RAS oncogene family [Source:RGD Symbol;Acc:619737]	ATAAAATGCACTTGAAATAAATTATATGAATAAATGACTGACAAGAACAAATGTGAACAA
chr1	Rab6a	+	155007970	CDS	none	0.142208	0.873158	1	N	Not Sig	ncbiRefSeq	RAB6A, member RAS oncogene family [Source:RGD Symbol;Acc:619737]	GGGGAAAGCTCAGGGACTCACCGGGGTGGAGTTTGCCTCCATCAGGGCTGTCTTCCATGC
chr1	Rab6a	+	155008920	intron	none	0.442669	0.680859	1	N	Not Sig	ncbiRefSeq	RAB6A, member RAS oncogene family [Source:RGD Symbol;Acc:619737]	AAATTCCCTCCTCTACTTGCACCCCAAGATCCTACTCCACACAGCTCCTGAATCCACTCA
chr1	Rabac1	-	80564028	unassigned	CATAAA	-0.00400599	0.89974	1	N	Not Sig	ncbiRefSeq	Rab acceptor 1 [Source:RGD Symbol;Acc:621002]	TCTCCAACCCCAGACCTCACTTCTTAGTGAAACCCCTCCTTACACGAGAAAATACCAGGA
chr1	Rabep2	+	181026651	3UTR	AATAAA	-0.0927668	0.859367	1	N	Not Sig	ncbiRefSeq	rabaptin, RAB GTPase binding effector protein 2 [Source:RGD Symbol;Acc:621416]	ATAAGGAAGCAAGGCCAGACTTTTCTGTCATTTATTTTCAATAAATAAGCAGTCAGCTAG
chr1	Rad9a	-	201488510	3UTR	ACTAAA	0.0211772	0.989639	1	N	Not Sig	ncbiRefSeq	RAD9 checkpoint clamp component A [Source:RGD Symbol;Acc:2319938]	AAATCATGCTGCCATGGGTCACACTGGCCTCTCAGGCCCACCCATCATGGGGAACACAGC
chr1	Ramac	+	135714125	3UTR	AACAAA	-0.0944112	1	1	N	Not Sig	ncbiRefSeq	RNA guanine-7 methyltransferase activating subunit [Source:RGD Symbol;Acc:1310022]	ACAACCAGCGGCCTCCATATGGTTACTACTGACAGATGTTGGCAGCTTTTAACAAAGACC
chr1	Ramac	+	135714228	3UTR	AAGAAA	0.100587	1	1	N	Not Sig	ncbiRefSeq	RNA guanine-7 methyltransferase activating subunit [Source:RGD Symbol;Acc:1310022]	GTCATAGCTTTTCATTCTATTTTAAAGAATGGGTTATTAATTGTTTAAACTTGAGACTTG
chr1	Ramac	+	135714417	3UTR	AATAAA	-0.187696	0.510584	1	N	Not Sig	ncbiRefSeq	RNA guanine-7 methyltransferase activating subunit [Source:RGD Symbol;Acc:1310022]	TTTCCTTATTTGGACTGTAGGAATTCTGTCTGTATCACAGAAATAAATTTTTTTAATTAA
chr1	Ranbp6	-	227572393	unassigned	TATAAA	-0.254527	0.459956	1	N	Not Sig	ncbiRefSeq	RAN binding protein 6 [Source:RGD Symbol;Acc:1305165]	GGGGGGGGATTCCATTTAAAACAAATTCTAATATAAAAAAGAACACAGTAGAAGGACAAT
chr1	Rasgrp2	+	203710611	intron	AATAAA	-0.0464038	1	1	N	Not Sig	ncbiRefSeq	RAS guanyl releasing protein 2 [Source:RGD Symbol;Acc:1311630]	AGCTCAGGGGGCACTACGCATGCTACACCATATGTGCTTAATAAATGTCTGTTCAATTGA
chr1	Rasgrp2	+	203722984	3UTR	AATAAA	0.113966	1	1	N	Not Sig	ncbiRefSeq	RAS guanyl releasing protein 2 [Source:RGD Symbol;Acc:1311630]	ACTTCTGTGAATATTTGTATTTTCCAGATGGAATAAAAAGGCCCGAATAATTAACCTCGA
chr1	Rasgrp4	+	84452839	exon	ATTAAA	-0.130099	0.89461	1	N	Not Sig	ncbiRefSeq	RAS guanyl releasing protein 4 [Source:RGD Symbol;Acc:620476]	CTGGTTTCCAACAGAAACAAGAACCTATAACAATCAAAAGAATTAAATTTATTTTTCACA
chr1	Rasip1	+	96109564	3UTR	AATAAA	-0.267576	0.868792	1	N	Not Sig	ncbiRefSeq	Ras interacting protein 1 [Source:RGD Symbol;Acc:1305291]	ATGGGAAGATGGGCTTGGGATGTGAATTCCAAGAAGTAATAAAAGTATCTGTGGTATTGA
chr1	Rassf7	+	196323778	3UTR	AATAAA	-0.17193	0.968727	1	N	Not Sig	ncbiRefSeq	Ras association domain family member 7 [Source:RGD Symbol;Acc:1306244]	GTGTGCTGCCTTCCTTCCCCTGACAGACCTCAATAAATCACCTTCCAAAGGTGCTTAAGG
chr1	Rbbp6	+	177535673	3UTR	AATAAA	-0.303183	0.800532	1	N	Not Sig	ncbiRefSeq	RB binding protein 6, ubiquitin ligase [Source:RGD Symbol;Acc:1311964]	CTGAACTCATTACAGCCCCGTTATGTCACTTTTTGATTACAATAAAAGTTTTCAGTAAAC
chr1	Rbbp6	+	177537395	3UTR	ATTAAA	-0.555143	0.645251	1	N	Not Sig	ncbiRefSeq	RB binding protein 6, ubiquitin ligase [Source:RGD Symbol;Acc:1311964]	AGGCACTGCCAGGTGCTCTGTACTTTCTATAACCATTAAAAATGCCCATGGCCCTTGATG
chr1	Rbm14	-	202076939	exon	TATAAA	0.836806	0.207979	1	N	Not Sig	ncbiRefSeq	RNA binding motif protein 14 [Source:RGD Symbol;Acc:620542]	AAAAAGGCATACACCACCACACCCAGATATAAGTGCTAAGACAAAAAAATATGCCAAAAA
chr1	Rbm14	-	202078266	3UTR	AATAAA	0.148765	0.605699	1	N	Not Sig	ncbiRefSeq	RNA binding motif protein 14 [Source:RGD Symbol;Acc:620542]	GTACAAATAAACAAAGAACCCAGAAATAAGCCCAAACAAGAACTTTCTCAAAGCACACAT
chr1	Rbm14	-	202087279	intron	AAGAAA	0.204131	0.734562	1	N	Not Sig	ncbiRefSeq	RNA binding motif protein 14 [Source:RGD Symbol;Acc:620542]	AAAGAAAGGTATTCCGGGTGGTAGGGGATGGGAGCTTGGAGGAAGGTTGCTTCAGGCTTA
chr1	Rbm14	-	202094570	intron	none	0.546577	0.564975	1	N	Not Sig	ncbiRefSeq	RNA binding motif protein 14 [Source:RGD Symbol;Acc:620542]	CATTAGCCTTGTAAACATGGCAGCAGCCATCCCCATCCCAGCCTGATCGCAGCCAGAACC
chr1	Rbm14	-	202094930	3UTR	none	0.258781	0.56696	1	N	Not Sig	ncbiRefSeq	RNA binding motif protein 14 [Source:RGD Symbol;Acc:620542]	TCACGTCTTCCTGGATGTCAAACTGGCTCACCTGACAGTGCAATCAAGACAATGACAACC
chr1	Rbm4	-	202078441	3UTR	none	0.377681	0.406096	1	N	Not Sig	ncbiRefSeq	RNA binding motif protein 4 [Source:RGD Symbol;Acc:1306891]	ATCCAATACCCACTGCAGTCAGGAGGCAGGGAGGAGACAGCACAGCCCCCACCAGTTTCT
chr1	Rbm42	-	85898617	unassigned	none	0.339415	0.508165	1	N	Not Sig	ncbiRefSeq	RNA binding motif protein 42 [Source:RGD Symbol;Acc:1306184]	CTTTCCAAGCTCAGGTGGGGTGAGCCAGGCCCTGTCAGCTAACAGTTTCTAAGTCCAGTC
chr1	Rbm4b	+	202058024	3UTR	AATAAA	0.244827	0.727246	1	N	Not Sig	ncbiRefSeq	RNA binding motif protein 4B [Source:RGD Symbol;Acc:1359343]	GTTTTATTCCACTCCCCCATATTTTTTTTGAAAAAAAAAAAATAAATGTTTCTAACACTT
chr1	Rbp4	-	235893916	unassigned	AAGAAA	0.748636	0.177569	1	N	Not Sig	ncbiRefSeq	retinol binding protein 4 [Source:RGD Symbol;Acc:3546]	GGCATCTCCAAGTACAGCCCACCTGCAGCTGGACCACAAAGAAGTCTGCAACTCACAGGA
chr1	Rccd1	-	134271869	unassigned	AAGAAA	-0.0573159	1	1	N	Not Sig	ncbiRefSeq	RCC1 domain containing 1 [Source:RGD Symbol;Acc:1309901]	AACTCACCAGAAGACAAAGTTCAAAGGATGTTGAAGAAATTTCAAGAATGTATTCTCAGA
chr1	Rccd1	-	134273846	CDS	none	1.2259	0.733178	1	N	Not Sig	ncbiRefSeq	RCC1 domain containing 1 [Source:RGD Symbol;Acc:1309901]	GCTAAGTACTGCTCTACCCTGAGTCTCACTTACGTGTCACCACAGCTGTGTGTCGGGATC
chr1	Rce1	-	201899357	unassigned	none	-0.269497	0.622619	1	N	Not Sig	ncbiRefSeq	Ras converting CAAX endopeptidase 1 [Source:RGD Symbol;Acc:1309261]	AATGTGGCCTTGGGTCCTTACCAAAGTCGGAGTACAGAGTGCCAAAGATCTAAGACCATG
chr1	Rcl1	+	226869044	3UTR	CATAAA	0.0239535	1	1	N	Not Sig	ncbiRefSeq	RNA terminal phosphate cyclase-like 1 [Source:RGD Symbol;Acc:1305320]	GTATGGCATAAAATTTGTTTTTATTCTTCTTATTGCACTGTAGTGTAAATTATTATAAGA
chr1	Rcn3	-	95564502	unassigned	none	0.103023	0.828376	1	N	Not Sig	ncbiRefSeq	reticulocalbin 3 [Source:RGD Symbol;Acc:1359365]	TGCTCCTCCATCTCTTCCCAGCATCCTCCACCCCGCTCTCAGACAGACAGACAGAGCAGG
chr1	Rcn3	-	95564654	3UTR	none	0.426316	0.857864	1	N	Not Sig	ncbiRefSeq	reticulocalbin 3 [Source:RGD Symbol;Acc:1359365]	CTGGGTCTGTGCTGGGGATGGTATCAGTGTCATTTAAGTGCCTGAGTGTCCTGGGCAGGT
chr1	Rdh13	+	69401110	3UTR	none	-0.0845471	0.643932	1	N	Not Sig	ncbiRefSeq	retinol dehydrogenase 13 [Source:RGD Symbol;Acc:1304959]	GTCAGGCTTGGTGGCAAGGGCCTTCACCTCTGAACCATAGTGCCAGCCCTGAGTCATAGG
chr1	Rdh13	+	69401454	3UTR	AATAAA	-0.34222	0.451947	1	N	Not Sig	ncbiRefSeq	retinol dehydrogenase 13 [Source:RGD Symbol;Acc:1304959]	CTGCGTTTACAATCAGTGTTTACAATCAAATAAATGGAAATAAACATTTCTATCACTCGT
chr1	Rela	+	202935480	3UTR	AATAAA	0.0252173	0.962903	1	N	Not Sig	ncbiRefSeq	RELA proto-oncogene, NF-kB subunit [Source:RGD Symbol;Acc:727889]	CAAAAAGCTATTGGACTCTTGCTCTTTCTAGCTCTGAACTAATAAATGTATTACCACGCT
chr1	Relb	-	79257737	unassigned	none	0.419699	0.858552	1	N	Not Sig	ncbiRefSeq	RELB proto-oncogene, NF-kB subunit [Source:RGD Symbol;Acc:2321078]	AACTGTTTTGTTCCACACAAACCTAGTGTTTCCTAAGCAAAAAAAGAGAGAAGACCCCAA
chr1	Relt	-	155206975	unassigned	AAGAAA	1.18928	0.457501	1	N	Not Sig	ncbiRefSeq	RELT, TNF receptor [Source:RGD Symbol;Acc:1305381]	TTAGCTCATGTCAAGACGGGTAAAATATGTAAGATTCTAAACTGAAAGAAAGAGCTCGTT
chr1	Reps1	+	12775560	3UTR	AATAAA	-0.0314477	0.958883	1	N	Not Sig	ncbiRefSeq	RALBP1 associated Eps domain containing 1 [Source:RGD Symbol;Acc:1307131]	ATTGTATTTAAGTATCTTTTATTTTTTAATTTCAATAAAAGGGTCAGGAGGACTTTCTCT
chr1	Rexo5	+	174240927	CDS	none	0.716866	0.743461	1	N	Not Sig	ncbiRefSeq	RNA exonuclease 5 [Source:RGD Symbol;Acc:1305412]	TGTCCTTCCAGCTGATGCTCCCACCTTTTGGAAACCAAAGCTGCCAACTTGGCCTCTTGC
chr1	Rexo5	+	174241495	3UTR	ATTAAA	0.434275	1	1	N	Not Sig	ncbiRefSeq	RNA exonuclease 5 [Source:RGD Symbol;Acc:1305412]	GCCAGCATTGTCTTAAATCTTTGCCACTGTCATGCATTAAAGAACAATTTTCATATGTTC
chr1	Rfk	+	214807438	3UTR	AATAAA	-0.161762	0.700582	1	N	Not Sig	ncbiRefSeq	riboflavin kinase [Source:RGD Symbol;Acc:1549748]	TGTTTGCAGACCTTGGAATAAAGTTTGACTGTTATTTTTTTCCTTTTCCCCTGTCAGCTC
chr1	Rfx3	-	225449871	unassigned	AATAAA	0.237872	0.449641	1	N	Not Sig	ncbiRefSeq	regulatory factor X3 [Source:RGD Symbol;Acc:1307779]	TGAGGAGAGGGGAAAAAAATAAAAAAATAAAAAAAAAACAACAAAAACCCAAGCCATTTC
chr1	Rfx3	-	225458908	CDS	none	1.04638	0.233869	1	N	Not Sig	ncbiRefSeq	regulatory factor X3 [Source:RGD Symbol;Acc:1307779]	TGTGCTGCTTCCTCTCACAGGAGCTCAGTCAAAAAGCCCTTAAGATTTTTCAGTTCTTAC
chr1	RGD1305014	-	186132359	unassigned	TATAAA	-0.478922	0.396871	1	N	Not Sig	ncbiRefSeq		GTTTGTCAAAACAATGGACAAGTATAAATTACCCCCCTTTTTAAAAAAAGAAACAACTTA
chr1	RGD1305014	-	186132837	3UTR	AATAAT	-0.630047	0.277466	1	N	Not Sig	ncbiRefSeq		AGAAAGAGTCTAAGTATACAACTTCCCAAAAATAATTAGAAAAAAATTGAATATCTTAGC
chr1	RGD1305713	-	135725868	unassigned	ATTACA	-0.00169	0.868384	1	N	Not Sig	ncbiRefSeq		AGTTCTACACAGGGAGATCCTGTCTCAGAAACAACATGGTCAACACTCTAAAATATTACA
chr1	RGD1305713	-	135726192	3UTR	AACAAA	-0.48903	0.294293	1	N	Not Sig	ncbiRefSeq		GGAAACATTCCCAACTGATTTCTGATGGGCTTAACAAACAATGAGAAGAACTTCCAGGAC
chr1	RGD1307554	+	82868325	3UTR	AATAAA	0.568972	0.242081	1	N	Not Sig	ncbiRefSeq	similar to CG16812-PA [Source:RGD Symbol;Acc:1307554]	ATATAGTTGAGGAAGACTTGGAATGTCTCTCTTTACAAATAAATTTATTTTGTGTGTATA
chr1	RGD1308544	-	34825886	unassigned	AACAAA	-0.0924984	0.905439	1	N	Not Sig	ncbiRefSeq		GAACCCTTCCCCAACAAATCCTTGCAAAGTGAAGAACCAGCATGCAAAGCAAACACAGCT
chr1	RGD1309036	-	94857114	3UTR	AATAAA	-0.0160587	1	1	N	Not Sig	ncbiRefSeq		CAAAAGAAAAAATATACGAAGCAAAATAAAAATTAAACAAAAAAAAAAAAAACCTAAAAC
chr1	RGD1309350	+	195909158	3UTR	AATAAA	0.372973	0.856599	1	N	Not Sig	ncbiRefSeq	similar to transthyretin (4L369) [Source:RGD Symbol;Acc:1309350]	ACCTGCAAATCCACATCTGTCACTGGGACAGGGACAATAAACCAGAACTTTGCTTCTGCC
chr1	RGD1311595	-	227490982	unassigned	AATAAA	0.637517	0.567143	1	N	Not Sig	ncbiRefSeq	similar to KIAA2026 protein [Source:RGD Symbol;Acc:1311595]	AAGCTGAATATGTATATATCAGCGTCTCAGTAAAGTAATAAAGTAATAAAGCTCCAGTAA
chr1	RGD1311595	-	227491855	3UTR	AACAAA	-0.159438	0.900403	1	N	Not Sig	ncbiRefSeq	similar to KIAA2026 protein [Source:RGD Symbol;Acc:1311595]	TATACGTGTATTCTTTCAATGGACAAGAACACATTTTAAAAATGGTATTCAAACAAAGAA
chr1	RGD1311703	+	170345584	3UTR	AATAAA	0.243043	0.83696	1	N	Not Sig	ncbiRefSeq		AGTCAGAGTTGTATAAAATGAGAAATAAATACTGCACTCAGCTTCCTTTCATATTAGCAT
chr1	RGD1311703	+	170346104	3UTR	AATAAA	0.109952	0.821943	1	N	Not Sig	ncbiRefSeq		TATGTGACCAAAGTTCATTTTTTCCTCCTAAGGTCTAAATAAAGAGAAAGCAGTTTCCCA
chr1	RGD1311703	+	170346863	3UTR	AACAAG	1.03893	0.70868	1	N	Not Sig	ncbiRefSeq		AACAGTGTGTAAAGTACCTTGAAGAAGTTTGGTTTTAGCTTGAACAATGATTTTGAAATC
chr1	RGD1311946	+	200953950	3UTR	ATTAAA	0.0541446	1	1	N	Not Sig	ncbiRefSeq	similar to RIKEN cDNA 1810055G02 [Source:RGD Symbol;Acc:1311946]	GCACACTTGGCCCTCGATGTGTGGAATTTTGACCAGAATTAAAAGCAATGACCTCTCTCC
chr1	RGD1359158	-	219136084	unassigned	AATGAA	-0.243495	0.608772	1	N	Not Sig	ncbiRefSeq		ATGTGAAAGTTCTGTTGTAGAATGAAGACGGGCACTCAAATTGACAAAGCTTCCTTGCCA
chr1	RGD1359158	-	219138194	intron	AACAAG	-0.268789	0.411421	1	N	Not Sig	ncbiRefSeq		GATGGGTATTGTGTATATCGGGAAAATCAGTCTCTAAGCTTTTATAACAACAAGACACAG
chr1	RGD1560015	-	47263646	unassigned	AATAAT	-0.145067	0.923394	1	N	Not Sig	ncbiRefSeq		TCATGGGCCCACCACATTTTATTTAATAACAACTGTTCTTCTTCTTTTTTGGGGGGGGGG
chr1	RGD1560108	+	204612845	3UTR	none	0.132949	0.41117	1	N	Not Sig	ncbiRefSeq		ACGCACACAATATCATTAGTAGTTTCTCATCTCTACACTTTTCTTTAAAAAAAAAAAAAA
chr1	RGD1560544	-	203369354	3UTR	none	0.628076	0.849588	1	N	Not Sig	ncbiRefSeq		CACAAATGTTGTGGCCCCACACATGCATGTACACAAAAGCTAAAGCACACTGAGACATCT
chr1	RGD1560854	+	82499841	3UTR	AATAAA	0.331554	0.635702	1	N	Not Sig	ncbiRefSeq		CCATTTGCTGTGGTACATGCACATTCACAGAAATGCAAATAAAAAGATTTTTTAACCCTT
chr1	RGD1562402	+	89563540	3UTR	ATTAAA	0.148403	0.692627	1	N	Not Sig	ncbiRefSeq	similar to 60S ribosomal protein L27a [Source:RGD Symbol;Acc:1562402]	GGAGGTGCCTGTGTCCTGGTGGCTTAAAGCCACTTCAGAGGCTAATTAAATGCAAACATT
chr1	RGD1563217	-	181434523	intron	none	-0.111211	0.992991	1	N	Not Sig	ncbiRefSeq		TGTAGTAAGAGGAGAAATGGAGGCACACACCTTATTCTCACTCCTTCCTCTGTCTTCCTA
chr1	RGD1563217	-	181437007	intron	none	0.0463523	0.891951	1	N	Not Sig	ncbiRefSeq		CTCTCTCCCTCCCCGCAGGCACTGGCTGTCCTCGGCCTACACACAGTTTGCAGTTCCCTA
chr1	RGD1563217	-	181438301	intron	none	0.385199	0.46791	1	N	Not Sig	ncbiRefSeq		AGTATCTGAGGGGAGAGATTCAGGCAGGCATAGCGCCTCAGGCTTTTGCCTTTTCTCCTA
chr1	RGD1563217	-	181438741	intron	none	0.888792	0.210657	1	N	Not Sig	ncbiRefSeq		AGGTGACTGTGGGAAGGGAGTCCCGCCTCTCCTTGCCCTACCTCGCTGTTCTTGTCCACA
chr1	RGD1564382	-	35156247	unassigned	none	0.175407	1	1	N	Not Sig	ncbiRefSeq		CATATGTTCCTGGACTTTTGTTTTGTTGTTGCTGCTGCTGTTGTTGATGAGCAACTTTTT
chr1	RGD1564801	-	74017247	unassigned	none	-0.375515	0.65525	1	N	Not Sig	ncbiRefSeq		CCCTCCCCTTCTTTTTTTTTATTATTCTTCTTTTTTTTATTATTATTAACTTGAGTATTT
chr1	RGD1565057	-	226689495	unassigned	ATTATA	0.0313557	1	1	N	Not Sig	ncbiRefSeq	similar to hypothetical protein FLJ32871 [Source:RGD Symbol;Acc:1565057]	TTAGCTCCTCATTATAATTCATTTAAAGAGAACATCAAAGCAAGACATCTCAGGAAAATG
chr1	RGD1565566	+	61494783	3UTR	AATAAA	0.113966	1	1	N	Not Sig	ncbiRefSeq		GAGGCCAAACACCTTCTTCTAGACACAGAGACCTACTGAATAAAAGCTTCAGACTGTCAA
chr1	RGD1566325	-	34979131	unassigned	none	-0.165814	0.377788	1	N	Not Sig	ncbiRefSeq	similar to regulator of sex-limitation candidate 16 [Source:RGD Symbol;Acc:1566325]	GTTGGACCTGAAGGACTACCACCAAAGATCCACTCATCCCAAAAGACCACTGGAGCCGAG
chr1	RGD1566325	-	35002319	intron	none	-2.60649	0.00489352	0.278797	N	Not Sig	ncbiRefSeq	similar to regulator of sex-limitation candidate 16 [Source:RGD Symbol;Acc:1566325]	GTCACCAGGCATTGGGTAATGTTGGGGTCTGGGAATCGCCTCACAAACCACATGAACACC
chr1	RGD1597339	+	205784576	3UTR	AATAAA	0.041129	0.958332	1	N	Not Sig	ncbiRefSeq		AAAGACTGGAGAGGGCCCTCTCTAGCAGTTAACTCCTTTTGTAATAAAGCTCTAGTGCTT
chr1	Rgma	+	127172918	3UTR	AGTAAA	0.482011	0.129994	1	N	Not Sig	ncbiRefSeq	repulsive guidance molecule BMP co-receptor a [Source:RGD Symbol;Acc:1311983]	GTAAATTATTTATTAATGGCTAAATGCAAGTAAAGTTTGGTTTGTTTTGTTATTTTCTTT
chr1	Rgmb	-	56766597	unassigned	ATTAAA	-0.308202	0.476762	1	N	Not Sig	ncbiRefSeq	repulsive guidance molecule BMP co-receptor b [Source:RGD Symbol;Acc:1595392]	CCTTCAAAAGACCTGAGGTGCAGTGTCCTTAAGGGTCAAGGCTACTCATTAAAGACAGAT
chr1	Rgmb	-	56766789	3UTR	none	-1.03577	0.156648	1	N	Not Sig	ncbiRefSeq	repulsive guidance molecule BMP co-receptor b [Source:RGD Symbol;Acc:1595392]	TCCTCCTGCAGAGGTTCCTCAGCTCGTCCAACAGGTGTCACTGTAATCACAGAGCAGACA
chr1	Rgs10	-	182946333	unassigned	none	0.624327	0.0158716	0.623093	N	Not Sig	ncbiRefSeq	regulator of G-protein signaling 10 [Source:RGD Symbol;Acc:3562]	CACGCACAGCCCGGGCAGGAAGGGCAGGGGGAAGGTTTACAAAGTAGAGATGGCTAAAGG
chr1	Rgs17	-	42222247	unassigned	ATTATA	0.179493	0.60388	1	N	Not Sig	ncbiRefSeq	regulator of G-protein signaling 17 [Source:RGD Symbol;Acc:1305515]	GTCTAGAAGTTATTATACTTGGATAGCATTACACCAATAAGCAAACAATAACTTGTCTAA
chr1	Rgs17	-	42226423	3UTR	AATAAA	0.807361	0.23002	1	N	Not Sig	ncbiRefSeq	regulator of G-protein signaling 17 [Source:RGD Symbol;Acc:1305515]	GAATTCAATCAATTTTGAATAAAGCAAATGTTGTGCTCTTGAAATGGTGGCAGAGACACC
chr1	Rgs17	-	42227628	3UTR	AATAAA	0.985709	0.413623	1	N	Not Sig	ncbiRefSeq	regulator of G-protein signaling 17 [Source:RGD Symbol;Acc:1305515]	AACATGATGCCAACCTTTCAAGTAAAATAAAGTGAAAAAGAAAACTCCAAACTTGCATCT
chr1	Rgs17	-	42229148	3UTR	none	-0.895121	0.459128	1	N	Not Sig	ncbiRefSeq	regulator of G-protein signaling 17 [Source:RGD Symbol;Acc:1305515]	GACTTTCCCAGTTGTCTTTTCCCAGCAGCCAACCTGTCGTTTTTTTCAGGAACTCGATTT
chr1	Rhog	-	156618712	unassigned	none	0.259218	0.538585	1	N	Not Sig	ncbiRefSeq	ras homolog family member G [Source:RGD Symbol;Acc:621310]	TCTGGGGAGCCCTAGCTCATGCCCACCCGCCAATGCCCAGCACACAGGGAGGAGCCGGGG
chr1	Rhpn2	+	88051900	3UTR	AATAAA	0.0340902	0.992132	1	N	Not Sig	ncbiRefSeq	rhophilin, Rho GTPase binding protein 2 [Source:RGD Symbol;Acc:1308366]	CCCGCTGTCCCTGGGGCTGTTTGTATAAATATTTAAATAAAGTCATGTTCATTGTTTGAG
chr1	Ric1	+	227384552	3UTR	AATAAA	-0.130123	0.805589	1	N	Not Sig	ncbiRefSeq	RIC1 homolog, RAB6A GEF complex partner 1 [Source:RGD Symbol;Acc:1310016]	TGCTTCTGTAATGTGTATTCCCACCCGTTGGTAAAGGGTAATAAAACTATTACACAAACA
chr1	Ric3	-	163030620	3UTR	none	-0.245459	0.497613	1	N	Not Sig	ncbiRefSeq	RIC3 acetylcholine receptor chaperone [Source:RGD Symbol;Acc:1588939]	AAGAGAAGCCCAGCTCCAGCCTCCTGGACCCCATACTGGTGACCGGCTTGGTGAGGACAG
chr1	Ric3	-	163030731	3UTR	none	-1.96984	0.0544881	1	N	Not Sig	ncbiRefSeq	RIC3 acetylcholine receptor chaperone [Source:RGD Symbol;Acc:1588939]	ATGTATGTCGATTTACACATGATTGTCTTTTCCTATTTTGGAGTGGTCAGACATTTTATT
chr1	Ric8a	+	195941468	3UTR	ATTAAA	-0.252325	0.556924	1	N	Not Sig	ncbiRefSeq	RIC8 guanine nucleotide exchange factor A [Source:RGD Symbol;Acc:727957]	AGACTGTATATCTGTGAAGTAGCCGGGTGAAAGAATATTAAATAGAAACTGATTTCATTC
chr1	Rin1	+	202361991	3UTR	AATAAA	0.262567	0.603685	1	N	Not Sig	ncbiRefSeq	Ras and Rab interactor 1 [Source:RGD Symbol;Acc:620006]	TCCCTAATCCTTTGTACAGGATGGAGCACTCTACAGGTGCTCAATAAATGGTGTCCACTG
chr1	Rin1	+	202362731	3UTR	CATAAA	-0.45019	0.473119	1	N	Not Sig	ncbiRefSeq	Ras and Rab interactor 1 [Source:RGD Symbol;Acc:620006]	CCCCCAAATCTCAAAAGAGGAGTGTGTGTATTTTGTGTCATAAAGAGAGATTCAGTACCA
chr1	Rinl	+	84087439	3UTR	AATAAA	-1.26197	0.335216	1	N	Not Sig	ncbiRefSeq	Ras and Rab interactor-like [Source:RGD Symbol;Acc:1310133]	CTCACCTGAATCTCTCTGGGGCAGGTAGAATAAAGGCACAGTCCCCAAAAGGTATCTACA
chr1	Riok2	+	58119396	3UTR	AATAAA	-0.265576	0.60117	1	N	Not Sig	ncbiRefSeq	RIO kinase 2 [Source:RGD Symbol;Acc:1311588]	TCTTTTTAAGACCAAAGCCAATATTTATGGAAATTATGGAAATAAACCCTTATTAGACTC
chr1	Rlbp1	-	133308919	unassigned	AATAAG	0.183419	0.676366	1	N	Not Sig	ncbiRefSeq	retinaldehyde binding protein 1 [Source:RGD Symbol;Acc:1309649]	TCCCCAAGTTGCTTTTGCTCAGCATTTTATCACGGGATAGAAACTCGAAATAAGACATAA
chr1	Rln1	-	227079959	unassigned	AATAAA	2.81086	0.211829	1	N	Not Sig	ncbiRefSeq	relaxin 1 [Source:RGD Symbol;Acc:3579]	CGAAATGTAAATAAGAAATACCCAAGTTAATAAAGATGGAGAAAAACAAAAAGGCAAAAA
chr1	Rmnd1	-	40859828	CDS	AGTAAA	-0.125385	0.604244	1	N	Not Sig	ncbiRefSeq	required for meiotic nuclear division 1 homolog [Source:RGD Symbol;Acc:1309546]	TGGGATCTTGGTGGAGTCAAGGAGTAGGGATCAGAGCCACGCCTAAAAATGAGACCATGC
chr1	Rmnd1	-	40866337	intron	ATTATA	-0.0534533	0.714393	1	N	Not Sig	ncbiRefSeq	required for meiotic nuclear division 1 homolog [Source:RGD Symbol;Acc:1309546]	AGCCTGCTTCTCCCTCCAGAGAGTTGGCATTATAGGCATGCACTGCCACTGGACCACAGA
chr1	Rmnd1	-	40875917	intron	none	-0.107695	1	1	N	Not Sig	ncbiRefSeq	required for meiotic nuclear division 1 homolog [Source:RGD Symbol;Acc:1309546]	TTTTGGGTATATGCCCAAGAGAGGTATAGCTGGATCCTCAGGCAGTTCAATGTCCAATTT
chr1	Rnaseh2c	+	202895674	3UTR	AATAAA	0.158313	0.822428	1	N	Not Sig	ncbiRefSeq	ribonuclease H2, subunit C [Source:RGD Symbol;Acc:2319141]	AGAGCCCTTCACACCACTTTGGAGCCACTGTTTCTATCCCAATAAATGAGATCTTCACAA
chr1	Rnaset2	+	52603150	3UTR	ACTAAA	-0.549404	0.714867	1	N	Not Sig	ncbiRefSeq	ribonuclease T2 [Source:RGD Symbol;Acc:1309918]	AGTAAGAGAAGTTCCCAAATCATTGCTTTCTAAAAATTCACTAAAAAGTTTCTTAAAATG
chr1	rnf141	-	164933971	unassigned	none	0.342537	0.667024	1	N	Not Sig	ncbiRefSeq	ring finger protein 141 [Source:RGD Symbol;Acc:1303154]	GAGCAACAGACCAGGTGGGCTGGAAGTATGGCTAAACAGTAGCAAACTGTAGCCCACCAT
chr1	Rnf146	+	28475758	3UTR	AATAAA	-0.325487	0.238544	1	N	Not Sig	ncbiRefSeq	ring finger protein 146 [Source:RGD Symbol;Acc:1306482]	TTTTTCTTTTTGATTAAAAACACTTTATAATTTAATAAATACTAGAATTTATCAGAAATA
chr1	Rnf169	-	154250461	unassigned	GATAAA	-0.490631	0.494044	1	N	Not Sig	ncbiRefSeq	ring finger protein 169 [Source:RGD Symbol;Acc:1583288]	CTGCCTTCAGCTTAGTCCACACCGAGACGCAGCTCTCCAGAGACTGATCAGAAATAGTCT
chr1	Rnf217	+	26108734	3UTR	ATTAAA	-0.181161	0.918857	1	N	Not Sig	ncbiRefSeq	ring finger protein 217 [Source:RGD Symbol;Acc:1306836]	CATGATGGTTATTTCCGTGGGCCTAACTTGGTAATGTACTGAATTAAAGCCAGTGTCAAC
chr1	Rnf40	+	182214572	CDS	none	1.03893	0.899771	1	N	Not Sig	ncbiRefSeq	ring finger protein 40 [Source:RGD Symbol;Acc:628638]	TCCCGCCCACCCCAGGCTGTAGAAGCAGCCCAGTTGGCTGAGGACCTGAAGGTGCAGTTG
chr1	Rnf40	+	182217898	3UTR	AATAAA	-0.154177	0.870673	1	N	Not Sig	ncbiRefSeq	ring finger protein 40 [Source:RGD Symbol;Acc:628638]	TCGTGTATGGGCTGCTAATTGTTATGAATAAATACCCAACCCTAGGCTGAGAGAAGCCGG
chr1	Rnh1	-	196269292	unassigned	AGTAAA	0.0483641	1	1	N	Not Sig	ncbiRefSeq	ribonuclease/angiogenin inhibitor 1 [Source:RGD Symbol;Acc:621398]	CAGTCATAGCATCATGGGTCCATAGCAGAGCTACACCAGCCCACAAATGATGATGAGGAC
chr1	Rnh1	-	196271496	CDS	none	0.0554778	1	1	N	Not Sig	ncbiRefSeq	ribonuclease/angiogenin inhibitor 1 [Source:RGD Symbol;Acc:621398]	CTCTACAGCGCAGCACACTTACCAAAGCACACGCAGCACTGTGTCCGGATAGCCCAGGGC
chr1	Rnls	-	231037480	unassigned	none	-1.54201	0.0397932	1	N	Not Sig	ncbiRefSeq	renalase, FAD-dependent amine oxidase [Source:RGD Symbol;Acc:1309804]	GCTGTAATTTGTCACCCTTGCAGCCTGAGCAAGATGCACAGAGACGGTTCAGTAATTAAG
chr1	Rnls	-	231041345	3UTR	AAGAAA	-0.474398	0.73505	1	N	Not Sig	ncbiRefSeq	renalase, FAD-dependent amine oxidase [Source:RGD Symbol;Acc:1309804]	GCTTCCATAAGGCTTGATAATGAAAAGTCAGAAAATTGGGGAAGAAGTAGTCTAAGAAAT
chr1	Rom1	-	205824049	unassigned	none	-0.193067	0.780427	1	N	Not Sig	ncbiRefSeq	retinal outer segment membrane protein 1 [Source:RGD Symbol;Acc:1306070]	GGCTCCTCCTCTGCACAGTCCTTCCTGCCCCCTTCCCCTTGACAAGAGAGAGAGCAGTGA
chr1	Rorb	-	216363628	unassigned	ATTATA	-0.85901	0.560784	1	N	Not Sig	ncbiRefSeq	RAR-related orphan receptor B [Source:RGD Symbol;Acc:1306778]	TATCTAAAAACATAGAAATAGGTAAGCCTAGTAAGTGGAATTTTCTTAAATTATAGTTGA
chr1	Rorb	-	216363749	3UTR	AATAAA	1.45525	0.403509	1	N	Not Sig	ncbiRefSeq	RAR-related orphan receptor B [Source:RGD Symbol;Acc:1306778]	AAATTCTATAAACAGTTGTCTCCAAAACATACCCGAATAAAATTAAAAAAGATAACACCC
chr1	Rpl13a	-	95609373	unassigned	none	0.225287	0.472893	1	N	Not Sig	ncbiRefSeq	ribosomal protein L13A [Source:RGD Symbol;Acc:628697]	GTCTTACAGTTCCCCTCTGCCCTCCCTGCTTCTGTATAGGAGACAGACCGCGAAACACCA
chr1	Rpl18	+	96191451	3UTR	AATAAA	0.0676312	0.86339	1	N	Not Sig	ncbiRefSeq	ribosomal protein L18 [Source:RGD Symbol;Acc:621182]	CAGCCGAGGCTACAAAAACTAACCCTGGCTCTTACTGTTAATAAAAAAGCTTTGGATGTT
chr1	Rpl27a	+	163542241	3UTR	ATTAAA	0.177124	0.580948	1	N	Not Sig	ncbiRefSeq		GTGGCTTAAAGCCACTTCAGAGGCTAATTAAATGCAAACATTTTCCATGTGGTCTGAGTA
chr1	Rpl27a	+	163542771	3UTR	AATAAA	-0.0474254	0.90147	1	N	Not Sig	ncbiRefSeq		GGGAAGATGAGGCTTTAAGAGGACCTTGGAATAAAAAACCAAGAACTTGATTGTCTACCT
chr1	Rpl28	-	69052147	unassigned	AATGAA	0.0116174	0.857988	1	N	Not Sig	ncbiRefSeq	ribosomal protein L28 [Source:RGD Symbol;Acc:621193]	GGGTTGAAAATAGTTCAAGTCGGACTAGAATGAACAACAAATAATCCAGATGAGACACAT
chr1	Rpl28	-	69052756	3UTR	AATAGA	0.849312	0.848117	1	N	Not Sig	ncbiRefSeq	ribosomal protein L28 [Source:RGD Symbol;Acc:621193]	GTTTTACACATCAGATGAATAGAACATACTTTCACTAAGGACTTCACTCTGAAACCTTTG
chr1	Rpl28	-	69053202	3UTR	ACTAAA	0.204209	0.591588	1	N	Not Sig	ncbiRefSeq	ribosomal protein L28 [Source:RGD Symbol;Acc:621193]	GGCACAACTAAAGACAAACGCAGGGCCACAGCTCAATGAGCCACAGAACAGGAGGCCTAA
chr1	Rplp2	+	196548634	3UTR	AATAAA	0.149321	0.751164	1	N	Not Sig	ncbiRefSeq	ribosomal protein lateral stalk subunit P2 [Source:RGD Symbol;Acc:621775]	GACATGGGATTTGGCCTGTTTGATTAAGTTCCCCTGCCAATAAAGCCTTTTTATGTATTT
chr1	Rpp30	+	233808531	3UTR	AATAAA	-2.891	7.89188e-05	0.0103856	Y	FDR<0.05	ncbiRefSeq	ribonuclease P/MRP subunit p30 [Source:RGD Symbol;Acc:1595116]	CAAATAAAACCCAGTGAAGCATTTTTAAAGACTAACGATTAATTTAGATATACTTTTAAA
chr1	Rpp30	+	233808672	3UTR	AATAAA	0.313475	0.507267	1	N	Not Sig	ncbiRefSeq	ribonuclease P/MRP subunit p30 [Source:RGD Symbol;Acc:1595116]	AAAAATAATAAATTAATGTTTTTTGTTCTTGGTACATATGGATTTGTAACTTTTACTATC
chr1	Rps11	-	95605689	exon	none	0.0902874	0.779269	1	N	Not Sig	ncbiRefSeq	ribosomal protein S11 [Source:RGD Symbol;Acc:621026]	CTCAGGTCTAAGCCCCGAAATCTCCTCTCTGATCCAGGACACAAGAGACTCCAAATCTGT
chr1	Rps12	+	21683010	3UTR	AATAAA	0.0824618	0.981501	1	N	Not Sig	ncbiRefSeq	ribosomal protein S12 [Source:RGD Symbol;Acc:62024]	GGATGTCATCGAGGAGTACTTCAAATGCAAGAAATGAATAAATAAAATTTTGGCTCATTT
chr1	Rps12l2	+	252598153	3UTR	AATAAA	0.147124	0.956694	1	N	Not Sig	ncbiRefSeq	ribosomal protein S12-like 2 [Source:RGD Symbol;Acc:2321899]	CATCGAGGAGTACTTCAAATGCAAGAAATGAATAAATAAAACTTTGGCTCAAAAAAAAAA
chr1	Rps13	-	170572924	unassigned	none	0.30032	0.539156	1	N	Not Sig	ncbiRefSeq	ribosomal protein S13 [Source:RGD Symbol;Acc:621027]	CTGCCGAAACACTTTCCCATCAACACATGCAGTACTGGCGCAGAGAAACACAAAACATGA
chr1	Rps15a	-	172420150	unassigned	none	0.0285086	0.930731	1	N	Not Sig	ncbiRefSeq	ribosomal protein S15a [Source:RGD Symbol;Acc:619939]	TATGTCAAACCTCGCAGCTGGGAGTACTCTGCTACAAAGATTCAAAAGTACTGACCCTGA
chr1	Rps16	+	83645809	3UTR	AATAAA	0.134632	0.588638	1	N	Not Sig	ncbiRefSeq	ribosomal protein S16 [Source:RGD Symbol;Acc:621031]	AAGCCAGTCTCAAGGATCAGGGTTTACCTTTGTAATAAACATCCTGGGACTTTATATTTC
chr1	Rps16	+	83645931	3UTR	none	-0.137223	0.993179	1	N	Not Sig	ncbiRefSeq	ribosomal protein S16 [Source:RGD Symbol;Acc:621031]	GCTGTGGGGACTGGAGTGATGGCTGCCTTCCCACAGCATTTGAGCTCTGACCTGGTTTCT
chr1	Rps16	+	83646054	3UTR	ATTAAA	0.217199	0.654385	1	N	Not Sig	ncbiRefSeq	ribosomal protein S16 [Source:RGD Symbol;Acc:621031]	CCTGCTTCTGCTTCACCAGTGCTAGGATTAAAGAGGTGTGGACTACCACATTCAGCGACT
chr1	Rps17	-	135295919	unassigned	AATACA	0.135239	0.824152	1	N	Not Sig	ncbiRefSeq	ribosomal protein S17 [Source:RGD Symbol;Acc:62027]	TAGGTCAGAAAGTGTTCAGACCCCCACCCTGACCCTAACAGCAACAATACAGCCAAACTT
chr1	Rps19l2	+	80486511	3UTR	AATAAA	0.18684	0.747505	1	N	Not Sig	ncbiRefSeq		AGCTGCCAACAAGAAGCATTAGAACAAAGGATGCTGGGTTAATAAATTGCCTCATTCATA
chr1	Rps3	-	153778362	unassigned	none	0.144138	0.655619	1	N	Not Sig	ncbiRefSeq	ribosomal protein S3 [Source:RGD Symbol;Acc:619888]	ACTGCTCCACAGGCCACCATAACAGTCAGCTGAACACTGGACACAATCCAGTCAGGCCTT
chr1	Rps5	+	73543073	3UTR	AATAAA	-0.0149144	0.915172	1	N	Not Sig	ncbiRefSeq	ribosomal protein S5 [Source:RGD Symbol;Acc:3601]	AACCGCTGATTTCCCAGCTGCTGCCTAATAAATTGTGTGCCCTTTGGGACAGTTACATCT
chr1	Rps6ka2	+	52906737	3UTR	AATAAA	0.141658	0.666922	1	N	Not Sig	ncbiRefSeq	ribosomal protein S6 kinase A2 [Source:RGD Symbol;Acc:620676]	TATTATGCTTTCCAAACTTTCCCATGAGATTTTTTGAATAAACATGGATTTTATGAAGTG
chr1	Rps6ka4	-	204021804	unassigned	none	0.256544	0.755015	1	N	Not Sig	ncbiRefSeq	ribosomal protein S6 kinase A4 [Source:RGD Symbol;Acc:1307277]	AGGTCCACCTGCCCCTCCAACTCTGGTTCCAGACATCCTCACCATGAACACAAACCACAG
chr1	Rps6kb2	-	201451264	3UTR	none	0.285694	0.901016	1	N	Not Sig	ncbiRefSeq	ribosomal protein S6 kinase B2 [Source:RGD Symbol;Acc:1305144]	CTGACAGTCCCACCAGTTCCCCGAAGTGTGTGCGCCCCAGATAGACACTGGACAGGTGAT
chr1	Rps6kb2	-	201451371	3UTR	AACAAG	0.221046	0.907211	1	N	Not Sig	ncbiRefSeq	ribosomal protein S6 kinase B2 [Source:RGD Symbol;Acc:1305144]	AATCCCCTCGGCTCCCTAAACAAGCCACTCTTGTGTTCTGAAGTCCAGCCAAAGTCACTC
chr1	Rps9l1	-	65511722	exon	none	0.0958032	0.80199	1	N	Not Sig	ncbiRefSeq		GCGGCCTACATGTAGTGCTTGACCCAACTATAGAAGTTGCACTCACCACAGAGCACACCA
chr1	Rras	+	95504360	3UTR	AATAAA	-0.402722	0.798759	1	N	Not Sig	ncbiRefSeq	RAS related [Source:RGD Symbol;Acc:1311443]	GTCACTGCTGTATATAACTCCCATCTGTCAGTATAATAAATATCACTGCCAACAACTGAA
chr1	Rras2	-	168233692	unassigned	none	0.178232	0.70714	1	N	Not Sig	ncbiRefSeq	RAS related 2 [Source:RGD Symbol;Acc:1310793]	CAGCCAGGTCTATACGCCTCACCGAAGCCCTGGCATGAAAAAGGAGCCATCAAGCGTCGT
chr1	Rrm1	+	156848262	3UTR	AATAAA	0.390468	0.591213	1	N	Not Sig	ncbiRefSeq	ribonucleotide reductase catalytic subunit M1 [Source:RGD Symbol;Acc:1592569]	TCACCAGCTGGAGATCTAGACAAACTTCCATAGTTGTTTTGAAATAAAAATTTCTAAGTG
chr1	Rrp12	-	240672377	unassigned	none	0.179599	0.856269	1	N	Not Sig	ncbiRefSeq	ribosomal RNA processing 12 [Source:RGD Symbol;Acc:1591867]	TAGACAGGAAGGGGTCAAGTCACTCTGCTCTATCCCTGGAGGGGCAAAGATGAAACTCTT
chr1	Rsf1	+	152015088	3UTR	AATAAA	-0.174195	0.806063	1	N	Not Sig	ncbiRefSeq	remodeling and spacing factor 1 [Source:RGD Symbol;Acc:1311245]	TATTATAATACTTGTCATTTCTTTTACTTAATATATGTTGTCATAATAAAAAGTTTAAAT
chr1	Rsph3	-	47101960	unassigned	AATAGA	-1.237	0.295008	1	N	Not Sig	ncbiRefSeq	radial spoke head 3 [Source:RGD Symbol;Acc:1311306]	GTGTTGATGTTTCTTCAGTTTGAAAAGAATAGATGGCTTTTGCTAACAATTGAAGACAAT
chr1	Rsph3	-	47116151	intron	AATAAA	0.0272557	1	1	N	Not Sig	ncbiRefSeq	radial spoke head 3 [Source:RGD Symbol;Acc:1311306]	GACAAGATTCTTATTAGTAAGACATCATGGCCTTTGAATATTCTGATAAATAAATGAAAA
chr1	Rsph6a	+	78720444	intron	AATAAA	-1.69548	0.189523	1	N	Not Sig	ncbiRefSeq	radial spoke head 6 homolog A [Source:RGD Symbol;Acc:1306786]	TCCACCCAGTGCTCTAAATAAAACTCCCACAGCACAGCCGCTTAGCCACACATTCACTCA
chr1	Rspo3	+	28367061	intron	none	-0.388878	0.87098	1	N	Not Sig	ncbiRefSeq	R-spondin 3 [Source:RGD Symbol;Acc:1563246]	TGTAGACTCATGATGCTGCTATCTCAACCAGATGTCCAGGACACTGTTCTGGCCATTAGG
chr1	Rspo3	+	28368660	3UTR	CATAAA	-0.225917	0.868078	1	N	Not Sig	ncbiRefSeq	R-spondin 3 [Source:RGD Symbol;Acc:1563246]	GGCCACCTGGCTTAAATGGTTTTCCACTTCTCTTTTAAGACATAAAACTTTGAAATAGTG
chr1	Rtn2	+	78948068	3UTR	AATAAA	0.0222924	0.864763	1	N	Not Sig	ncbiRefSeq	reticulon 2 [Source:RGD Symbol;Acc:1303245]	TTCACTTACACCTTCCTACATTGAAAAAAATTAAAACAAACAAATAAAAACGTAAAAAAC
chr1	Rtn3	-	204612674	3UTR	AATAAA	0.223063	0.182545	1	N	Not Sig	ncbiRefSeq	reticulon 3 [Source:RGD Symbol;Acc:620988]	GGGAGTGAGTGAGCCTTTGCTCTCACTTCACCCAAACTGTACAGAGAATAAAGTTGCAGA
chr1	Rusf1	-	182852256	intron	none	0.130916	0.782966	1	N	Not Sig	ncbiRefSeq	RUS family member 1 [Source:RGD Symbol;Acc:1310127]	CCTTTCCACCCCGTTAGCCAGTCTGCTTCAAGGAATGCCCACAGAGGCCAGAGGCCAGGA
chr1	Rusf1	-	182855519	intron	none	0.390971	0.929621	1	N	Not Sig	ncbiRefSeq	RUS family member 1 [Source:RGD Symbol;Acc:1310127]	GCAAAGGAGGTATGGTTCTTGATGGCCCTCAACCAGCTGCTTCAGCTCAGAGACACTGAG
chr1	Rusf1	-	182856484	intron	none	0.318268	0.853946	1	N	Not Sig	ncbiRefSeq	RUS family member 1 [Source:RGD Symbol;Acc:1310127]	GACAGAGACAGGGATGGCCAGAAACCTGTTGGAAGCGGAGTCAGGATGCTCAGGCAGAGG
chr1	Ruvbl2	-	95902013	unassigned	AATAAA	0.101991	0.919686	1	N	Not Sig	ncbiRefSeq	RuvB-like AAA ATPase 2 [Source:RGD Symbol;Acc:1306509]	AATAAAGGCTTTACAACTGCACTCCGATGTCCTTTTGTGTGATCTGAGGATACAGCAGAA
chr1	Ryr1	-	84292577	unassigned	AGTAAA	0.453964	1	1	N	Not Sig	ncbiRefSeq	ryanodine receptor 1 [Source:RGD Symbol;Acc:1586637]	GGATGCCTAGCCCCCCTCCCACCCGCCCCCCCCAGATTTAAATGACCCCACACAATGAGG
chr1	Sae1	-	77030960	unassigned	AATAAG	0.124496	0.802596	1	N	Not Sig	ncbiRefSeq	SUMO1 activating enzyme subunit 1 [Source:RGD Symbol;Acc:1306098]	AGGTTTGAGAAAAATAAGAGACCAGCCACCCACCCACAAGTTTCTAAACCAGGAGACAAG
chr1	Samd4b	-	83689412	unassigned	CATAAA	-0.475851	0.531915	1	N	Not Sig	ncbiRefSeq	sterile alpha motif domain containing 4B [Source:RGD Symbol;Acc:1305597]	AGTGCATCATAAATGAGAAATTAGAGTCTTTTTTGTTTTTTGTTTTTGTTTTTTTGTTTT
chr1	Sars2	+	84040724	3UTR	AATAAA	0.0824221	0.914385	1	N	Not Sig	ncbiRefSeq	seryl-tRNA synthetase 2, mitochondrial [Source:RGD Symbol;Acc:1309456]	CCACTTCCTCTTCCACCTCAGCGCCGAGCAGAATGCCCACAATAAATGGTCATGAGAACA
chr1	Sart1	-	202690471	unassigned	none	0.00524027	1	1	N	Not Sig	ncbiRefSeq	spliceosome associated factor 1, recruiter of U4/U6.U5 tri-snRNP [Source:RGD Symbol;Acc:61930]	TGACCATGAACTGAGACCTTGATCCTAGGTCAAGCCTTAGACTGCAGCACAACCAAGAGG
chr1	Sash1	-	3119914	unassigned	none	-0.0690895	0.97706	1	N	Not Sig	ncbiRefSeq	SAM and SH3 domain containing 1 [Source:RGD Symbol;Acc:1566017]	TACAATTAATTTCATTTTTCTCCCATTTTTGAAGCATCACAGGAACACCCAAAGCAACAG
chr1	Sbf2	-	164352891	unassigned	none	0.512286	0.459881	1	N	Not Sig	ncbiRefSeq	SET binding factor 2 [Source:RGD Symbol;Acc:1588657]	CCCTGGTGCTCCTGAGAAGTGTACAGTGCAGAGCGAACCCGACTTCACGGCACTCGACAG
chr1	Sbk1	+	180851908	3UTR	AATAAA	-0.611321	0.426727	1	N	Not Sig	ncbiRefSeq	SH3 domain binding kinase 1 [Source:RGD Symbol;Acc:628713]	TAAATGTGTTATTTACTTCTCTAACTATGACAATTGCTATAAAATAAAAATTTAGAAAAA
chr1	Sbsn	+	86006031	3UTR	AATAAA	-0.0521601	0.952313	1	N	Not Sig	ncbiRefSeq	suprabasin [Source:RGD Symbol;Acc:1562305]	CCTGGGTGCCCTAAGGGGGCTGCTTTGAGCTTTGTGAATAAAATTGACACACGATCCCTT
chr1	Scaf1	-	95485447	unassigned	none	0.0117621	0.931574	1	N	Not Sig	ncbiRefSeq	SR-related CTD-associated factor 1 [Source:RGD Symbol;Acc:708405]	TAGAGCCGTCTTTGAACTCACAGAGATCCATCTACTTCAAGTGTGCACCAGTACGCCAGT
chr1	Scaf1	-	95487554	intron	none	-0.0282545	1	1	N	Not Sig	ncbiRefSeq	SR-related CTD-associated factor 1 [Source:RGD Symbol;Acc:708405]	TTTACCTGCCCAGCCCCCAGTCCCATTCTTCTAGTGCTTTGACTCTCCCAGTCCATCTCA
chr1	Scaf8	+	43804980	3UTR	AATAAA	2.40897	0.00567522	0.31192	N	Not Sig	ncbiRefSeq	SR-related CTD-associated factor 8 [Source:RGD Symbol;Acc:708362]	ATACGTTTTAATGTTGGGTGAATTTTGTTTTTAGATGCCAATAAAACTTATTTGTTTGAT
chr1	Scaf8	+	43855888	3UTR	AATAAA	-0.464229	0.421945	1	N	Not Sig	ncbiRefSeq	SR-related CTD-associated factor 8 [Source:RGD Symbol;Acc:708362]	GAACTCTAACCTCCAACAGTATGATCTCACTTTGGACATTCATAATAAAAGCTGAAACTC
chr1	Scd	-	243269744	unassigned	none	-0.210258	0.624093	1	N	Not Sig	ncbiRefSeq	stearoyl-CoA desaturase [Source:RGD Symbol;Acc:621176]	ATCCCCAGGTTCCATCCCCAGCTGTGTGTTTGCGATAGGTAGGATGACCACAGCCGAAAG
chr1	Scd2	+	243182231	3UTR	AATAAA	0.112324	0.798412	1	N	Not Sig	ncbiRefSeq	stearoyl-Coenzyme A desaturase 2 [Source:RGD Symbol;Acc:621177]	AAGTATTTCTACTCATCTGAGGTTGTGTTTGTTCATAATAAAATGAAATGGATCTGACTG
chr1	Scgb1c1	+	195925019	3UTR	AATAAA	1.10787	0.333887	1	N	Not Sig	ncbiRefSeq	secretoglobin, family 1C, member 1 [Source:RGD Symbol;Acc:1561432]	TGCTTCTTCACCAGTAAATTCACCCTCGAACTGTTAAATCAATAAAGTCTAATGCAGTCC
chr1	Scn1b	-	86353916	unassigned	AATAGA	0.0566205	0.609675	1	N	Not Sig	ncbiRefSeq	sodium voltage-gated channel beta subunit 1 [Source:RGD Symbol;Acc:3631]	GTGTGATTGGGGTTGAGGAGTGGGGGTGGGGGACTGAGGGCGTTAATGAGAGAATAGAGA
chr1	Scube2	-	163831875	unassigned	none	-0.47414	0.40112	1	N	Not Sig	ncbiRefSeq	signal peptide, CUB domain and EGF like domain containing 2 [Source:RGD Symbol;Acc:1563998]	TGTGTGTGTGTGTGGTGTGTGTGTGTGTGGTGTGTGTGGTGTGTGGTGTGTGTGTGTGTG
chr1	Scyl1	-	203045775	3UTR	none	-0.0492718	0.981128	1	N	Not Sig	ncbiRefSeq	SCY1 like pseudokinase 1 [Source:RGD Symbol;Acc:1307330]	TCCCTGAGGATGATTTCTAGAAACTTCCAAGTCAGATCTGCCCCTTTAATTTACTCTTGG
chr1	Sdha	+	28960933	3UTR	AATAAA	0.023217	0.907325	1	N	Not Sig	ncbiRefSeq	succinate dehydrogenase complex flavoprotein subunit A [Source:RGD Symbol;Acc:621557]	ATAATTCTTAAATGATGTACAAACGAACAATCTTTTATTTCTAAATAAAACCACATAGTA
chr1	Sdhaf1	-	85576206	unassigned	AAGAAA	-0.793467	0.146001	1	N	Not Sig	ncbiRefSeq	succinate dehydrogenase complex assembly factor 1 [Source:RGD Symbol;Acc:1562079]	TAACAAGACCCTGTCTCAAAAGAAAAAGCAAAGGCCCCTAATGAAAGAATCAACAAGATT
chr1	Sdhaf2	-	207139069	unassigned	none	-0.627185	0.165705	1	N	Not Sig	ncbiRefSeq	succinate dehydrogenase complex assembly factor 2 [Source:RGD Symbol;Acc:1309216]	AGCCCTGAAGCAACAGTCAGCCAACTGTGAACTGTACCTTTTGAAAACACGAGCCAAAAC
chr1	Sdhaf2	-	207142922	3UTR	AACAAA	0.0205067	0.860724	1	N	Not Sig	ncbiRefSeq	succinate dehydrogenase complex assembly factor 2 [Source:RGD Symbol;Acc:1309216]	ACAGAGAAGCCATGTTGTCTAGCAGGACGTTCATGAGCTTTGGATGTAGATCAAACAATA
chr1	Sec11a	-	134881447	unassigned	AAGAAA	-0.141121	0.603337	1	N	Not Sig	ncbiRefSeq	SEC11 homolog A, signal peptidase complex subunit [Source:RGD Symbol;Acc:69360]	AACCAGCCAAGAAAGGCACATTTCAGGAGCTTTCCCAACAAACAGAATTCAGGGGAAGGG
chr1	Sec11a	-	134881631	3UTR	AATACA	0.0759488	0.923091	1	N	Not Sig	ncbiRefSeq	SEC11 homolog A, signal peptidase complex subunit [Source:RGD Symbol;Acc:69360]	TGCACAGAGCTCTGTAGGCACTTTAAAAGTGAAGCTTGGCTTCAAAATACAAACACTGGG
chr1	Sec23ip	+	183363110	3UTR	ATTAAA	-1.96154	0.0231625	0.790227	N	Not Sig	ncbiRefSeq	SEC23 interacting protein [Source:RGD Symbol;Acc:1309328]	TATTTCTATTTCTTAAAACTATTGTCAATGGGCTATTAAACTTTATTTTTCTTTGTATTA
chr1	Sec23ip	+	183363944	3UTR	AATAAA	0.355701	0.443511	1	N	Not Sig	ncbiRefSeq	SEC23 interacting protein [Source:RGD Symbol;Acc:1309328]	GTATGTGTTCTACCTGGTGTGAATAAAACAATGACATTGATGCTCTTTTTAAAGCTGCAA
chr1	Sec31b	-	243378321	intron	AATACA	-0.759548	0.613662	1	N	Not Sig	ncbiRefSeq	SEC31 homolog B, COPII coat complex component [Source:RGD Symbol;Acc:1598329]	GATGCTAATACACGAGAAGCCCCTTTTTATTTTATTTATTTATTTATTTATTTATTTATT
chr1	Selenos	+	119669543	3UTR	AGTAAA	0.0805519	0.907912	1	N	Not Sig	ncbiRefSeq	selenoprotein S [Source:RGD Symbol;Acc:628897]	TTAAACTCAAGGAAATTTCTTTGTGAGCTTGACTTTGTCAGACAGTAAACAGCTTTTTAT
chr1	Selenov	-	83551472	unassigned	none	0.061066	0.884486	1	N	Not Sig	ncbiRefSeq	selenoprotein V [Source:RGD Symbol;Acc:1562943]	ACCTTAGGCATTAGTGTGGTGGTGACAGACAGCAGACATTGTCAGACGCCGACACAGGGA
chr1	Selenow	-	76599440	unassigned	AATAAA	-0.0218588	0.888794	1	N	Not Sig	ncbiRefSeq	selenoprotein W [Source:RGD Symbol;Acc:3661]	ACCTTGAATTCCCCATCCAGGATTGTGACCCGAAACTGCAAGGCAAAATAAACTACATTT
chr1	Sema4b	+	134177775	3UTR	AATAAA	0.00799788	0.988617	1	N	Not Sig	ncbiRefSeq	semaphorin 4B [Source:RGD Symbol;Acc:1307872]	TTTTAATAAGATGCACTTTACTTTCTTTTTTTTTTTAAATAAAGTCCAGCAAATTATAGT
chr1	Sema4g	+	243865342	exon	AATAAA	-0.616375	0.531231	1	N	Not Sig	ncbiRefSeq	semaphorin 4G [Source:RGD Symbol;Acc:1310436]	GAATGGGGAGCCTGGGCTCTGCTCCTCCTGATGTTGGCTAATAAATGCCCTCTTTCCCCA
chr1	Sephs2	-	181893145	intron	GATAAA	-0.71908	0.194491	1	N	Not Sig	ncbiRefSeq	selenophosphate synthetase 2 [Source:RGD Symbol;Acc:1308827]	CCCGAGAACCTGTCTGAAACAAGATAAAGTGACCCACAGAACCAAGCATTAGCCACAAGA
chr1	Septin1	-	181832699	unassigned	none	0.823515	0.43056	1	N	Not Sig	ncbiRefSeq	septin 1 [Source:RGD Symbol;Acc:1307216]	TAGTGGCCAGGAGGCCTCCAAAGTGCAGTTCCATTCCTGCTGGGAAGAAGATTCGGGCAA
chr1	Serac1	-	46620740	3UTR	none	0.498035	0.320229	1	N	Not Sig	ncbiRefSeq	serine active site containing 1 [Source:RGD Symbol;Acc:1565064]	GGTAGGGAGGAAGCAGAGGGAGGCAGGAAAAGACCAGAAATGCAAGACAGAACCATTATG
chr1	Sergef	-	96949659	unassigned	none	-0.140573	0.806187	1	N	Not Sig	ncbiRefSeq	secretion regulating guanine nucleotide exchange factor [Source:RGD Symbol;Acc:1563497]	TCTCGAGCTGACAGGACGATTATTGACCCCATAATCTATCAGAAGGATTCTCCAGGGAAT
chr1	Sergef	-	96949914	exon	AATACA	-0.0537838	0.877099	1	N	Not Sig	ncbiRefSeq	secretion regulating guanine nucleotide exchange factor [Source:RGD Symbol;Acc:1563497]	ATGGTGCAGGGTGTGCCGGCAGCTGACATAAGGCCAAGGAGTGGCCCGCCCCACAGCCCA
chr1	Sergef	-	97101754	intron	none	-0.111211	0.934484	1	N	Not Sig	ncbiRefSeq	secretion regulating guanine nucleotide exchange factor [Source:RGD Symbol;Acc:1563497]	TCAGACTGGTATATAGGAAGCCCTCAGGAAACCCTTCTCTGTGAGGCAGGGAAGGCAGCA
chr1	Serpinh1	-	153643499	unassigned	AATAAG	0.0912854	0.684528	1	N	Not Sig	ncbiRefSeq	serpin family H member 1 [Source:RGD Symbol;Acc:69302]	CCTGAACCACTTTTAGGAATAAGGGAACCTCCTCCTTCTTTAATCTGCTTCCACACGCCT
chr1	Sertad1	+	82778961	3UTR	ATTAAA	2.01326	4.50336e-07	0.000100184	Y	FDR<0.05	ncbiRefSeq	SERTA domain containing 1 [Source:RGD Symbol;Acc:1549778]	ATTATCCCCAGTGTGGGAAGAGACCTCATAATTTTTGGAAATTAAAACCAGCTTTGGGAA
chr1	Sertad3	+	82767271	3UTR	AATAAA	0.351744	0.75566	1	N	Not Sig	ncbiRefSeq	SERTA domain containing 3 [Source:RGD Symbol;Acc:1564271]	TTGTTTTTTGTTTTTTTTTTTCTAATAAAAGCATTTTGGAATGATTGGAATCGTAATTAA
chr1	Setd1a	+	182411695	3UTR	ATTAAA	0.0671685	1	1	N	Not Sig	ncbiRefSeq	SET domain containing 1A, histone lysine methyltransferase [Source:RGD Symbol;Acc:1311624]	GTTAATAGTGAAACCCAACACCACATTTTTATAATTGTGATTAAACTTTATTGTACAAAA
chr1	Sez6l2	+	181577455	3UTR	AATAAA	0.104414	0.500796	1	N	Not Sig	ncbiRefSeq	seizure related 6 homolog like 2 [Source:RGD Symbol;Acc:1565281]	GTTCTTGTTTTTGAGCAATAAACGGAAAGTCACCACTTGTAACTGAGCTGGTGAGTCTGG
chr1	Sf1	+	203683432	3UTR	AATAAA	0.642464	0.0710592	1	N	Not Sig	ncbiRefSeq	splicing factor 1 [Source:RGD Symbol;Acc:620645]	TTGATTCAACACTGCACTAAGCGGGGAATGTTCCAATTAATAAAAGAGCAGTGTGGTTTT
chr1	Sf3b2	-	202570422	unassigned	AGTAAA	-0.0587605	0.836061	1	N	Not Sig	ncbiRefSeq	splicing factor 3b, subunit 2 [Source:RGD Symbol;Acc:1307159]	AACCCTACACCTACAACCCACCCACACACACACTAGTAAATCCAAGTAGTTAGCCGGGAC
chr1	Sf3b2	-	202570785	3UTR	ATTATA	0.112017	0.880217	1	N	Not Sig	ncbiRefSeq	splicing factor 3b, subunit 2 [Source:RGD Symbol;Acc:1307159]	CTGATTATAGGCAAGAAGTATATTCTTTTGCAGAAGCTAAAAAAGAGAGAGGTTCAAGAG
chr1	Sf3b5	+	7357634	3UTR	none	-1.459	0.236604	1	N	Not Sig	ncbiRefSeq	splicing factor 3b, subunit 5 [Source:RGD Symbol;Acc:1586993]	CGAGAGACTGTCGGGTCTCCTGGGAGCTGTGCGGAAGGAGTGATCCCAGAATCGGCAAGC
chr1	Sf3b5	+	7357752	3UTR	CATAAA	0.050723	0.880167	1	N	Not Sig	ncbiRefSeq	splicing factor 3b, subunit 5 [Source:RGD Symbol;Acc:1586993]	TGTCGTTCTCGCCTTTTTTTTTTTTAAATATATATCATACATAAAGTTAGGATTTGTTAT
chr1	Sfr1	+	246623106	3UTR	AATACA	0.779895	0.662289	1	N	Not Sig	ncbiRefSeq	SWI5-dependent homologous recombination repair protein 1 [Source:RGD Symbol;Acc:1305481]	AATTCTAGAAACCAGGTTTAATACATTGATTTTTGGGGCAAAAGGTTTTATATTCAGTAT
chr1	Sfr1	+	246623250	3UTR	ATTAAA	-0.217533	0.422627	1	N	Not Sig	ncbiRefSeq	SWI5-dependent homologous recombination repair protein 1 [Source:RGD Symbol;Acc:1305481]	GCTTAACATCTGTCTGCTAACTTAGCAGCTAATTAAACTTACCTGTGTACAGTTTTCTCC
chr1	Sft2d1	-	52409686	unassigned	none	0.100645	0.790752	1	N	Not Sig	ncbiRefSeq	SFT2 domain containing 1 [Source:RGD Symbol;Acc:1359119]	AGTGGTGTGAACTGCCCACAAGCTACACCTTCTCCACCTTATACGGCTGATCCAGAAAAT
chr1	Sft2d1	-	52409799	3UTR	TATAAA	0.789139	0.730389	1	N	Not Sig	ncbiRefSeq	SFT2 domain containing 1 [Source:RGD Symbol;Acc:1359119]	TATTACACGTAATAAGTAATTTTGGGCTTAAAGTATATAAAGTTTCACATTTTTAAAGTT
chr1	Sfxn2	+	245459310	3UTR	none	1.11313	0.558164	1	N	Not Sig	ncbiRefSeq	sideroflexin 2 [Source:RGD Symbol;Acc:1306131]	CCTGGATTCAGTCCCCACCTCCAAAAAAAAAAAAAAAAAAAAAAAAAAAAAAAAAAAAAA
chr1	Sfxn3	+	243917064	3UTR	AATAAA	-0.151671	0.546378	1	N	Not Sig	ncbiRefSeq	sideroflexin 3 [Source:RGD Symbol;Acc:620716]	ACCCCCTCCTCCAGTGACAACAGGTGTCATGTCATGGTGTCAATAAACTGCAGTCCTGTC
chr1	Sfxn4	-	259976479	unassigned	AATAGA	0.109929	0.945742	1	N	Not Sig	ncbiRefSeq	sideroflexin 4 [Source:RGD Symbol;Acc:1306088]	TGTGTCTATCTGGAGGCTATCAATGTAGTGTTTGTACCCCAGATAAGGTATAACCGGACA
chr1	Sgf29	+	181271930	3UTR	AATAAA	0.447512	0.811262	1	N	Not Sig	ncbiRefSeq	SAGA complex associated factor 29 [Source:RGD Symbol;Acc:1310609]	CAACCTCATGGGAGAAGGCAACAAAGGAGTTCCTATGATCCAATAAATACTCTTCCCTCT
chr1	Sgf29	+	181271931	3UTR	AATAAA	-0.755755	0.576383	1	N	Not Sig	ncbiRefSeq	SAGA complex associated factor 29 [Source:RGD Symbol;Acc:1310609]	AACCTCATGGGAGAAGGCAACAAAGGAGTTCCTATGATCCAATAAATACTCTTCCCTCTC
chr1	Sgk1	-	22980256	unassigned	AACAAA	0.652206	0.0412401	1	N	Not Sig	ncbiRefSeq	serum/glucocorticoid regulated kinase 1 [Source:RGD Symbol;Acc:3668]	TTATTTCCCCCGTCCTAAATCCAGTTTACCGAAACATAACAAAGTTAAACAAGTGACACA
chr1	Sgms1	-	229996672	unassigned	AATATA	0.0696872	0.940614	1	N	Not Sig	ncbiRefSeq	sphingomyelin synthase 1 [Source:RGD Symbol;Acc:727912]	TACATTGATTTAACAGCTTCATGATTTCTGTGAAGATGAACACAATATAATAGCCACAGA
chr1	Sh2b1	-	181048621	unassigned	none	0.182027	0.793269	1	N	Not Sig	ncbiRefSeq	SH2B adaptor protein 1 [Source:RGD Symbol;Acc:620132]	GAGCTCAGGAGACAGTTCTACCCGTCTGTCCCAGGTCTACTCCAAACATCAGCCACAGCC
chr1	Sh3gl3	+	136255669	3UTR	AATAAA	-0.0486703	0.999015	1	N	Not Sig	ncbiRefSeq	SH3 domain containing GRB2 like 3, endophilin A3 [Source:RGD Symbol;Acc:620578]	TTTCCTGTTTTAAGCTTACCTGTGAACAGCCCAATAAACATGGCACACTGTGTTCATAAA
chr1	Sh3pxd2a	-	246153659	unassigned	none	-0.145403	0.883463	1	N	Not Sig	ncbiRefSeq	SH3 and PX domains 2A [Source:RGD Symbol;Acc:1311185]	GGCCAGTGGGGCTTTTGCTGGTCAACGAATGAGTCCTCCGGTGCCAGAGAGAATCACATG
chr1	Shank1	+	94854247	CDS	none	0.334857	0.916924	1	N	Not Sig	ncbiRefSeq	SH3 and multiple ankyrin repeat domains 1 [Source:RGD Symbol;Acc:621011]	CCCTCTGCCACCACTCCCCACTGGGTCTGGGGTCTCCTCTTCAACAGCTGCAGCCCCGGG
chr1	Shank1	+	94857354	3UTR	ATTAAA	0.0638615	0.820555	1	N	Not Sig	ncbiRefSeq	SH3 and multiple ankyrin repeat domains 1 [Source:RGD Symbol;Acc:621011]	AGAGAAATGGCTTTTGTATCAGGTCATTCTTTATAATTAAACTCACAGTATCCACCCCCT
chr1	Shank2	+	199589426	3UTR	AATAAA	-0.495305	0.180131	1	N	Not Sig	ncbiRefSeq	SH3 and multiple ankyrin repeat domains 2 [Source:RGD Symbol;Acc:628772]	TTCAATCTCTTGTATGGCAACCAAAATTACTGTAAAAAAAAATAAATATACTCTTGCAAT
chr1	Shank2	+	199590961	3UTR	ATTAAA	0.477826	0.210775	1	N	Not Sig	ncbiRefSeq	SH3 and multiple ankyrin repeat domains 2 [Source:RGD Symbol;Acc:628772]	GAGAGAACATTGAAACCGAATTGTGTTATCAACTAATTTTCCATTAAAAGTGCTCTCTGC
chr1	Shisa7	+	69012943	3UTR	AATAAA	-0.0975458	0.827502	1	N	Not Sig	ncbiRefSeq	shisa family member 7 [Source:RGD Symbol;Acc:1583944]	TGGCACTTGGTTGGGGGTAGAGTGTTGTTTTTTGTTTTGGAATAAACAGCTGTTTTCCTG
chr1	Shkbp1	-	82636796	unassigned	AACAAA	0.632758	0.708575	1	N	Not Sig	ncbiRefSeq	Sh3kbp1 binding protein 1 [Source:RGD Symbol;Acc:1309281]	GGACAGCAACCCTCCTCCCCCAAACAAAACAAAACAAAACAAAACAAAACAAAAGACTAT
chr1	Shoc2	+	253047336	3UTR	ATTAAA	0.154338	0.884112	1	N	Not Sig	ncbiRefSeq	SHOC2 leucine-rich repeat scaffold protein [Source:RGD Symbol;Acc:1308146]	TTTGGGTATTTTGTTCTAAACAACTATTTTTAAAAATTAAAACTGTAATATCAAGATAAA
chr1	Shoc2	+	253047595	3UTR	TATAAA	0.158364	0.668526	1	N	Not Sig	ncbiRefSeq	SHOC2 leucine-rich repeat scaffold protein [Source:RGD Symbol;Acc:1308146]	TTCCATCTACTGTGGCTTTTCAGTTAAGATTTTGTTTATAAAAGGAATTTATTACAGTTC
chr1	Shoc2	+	253047756	3UTR	AATATA	-1.42456	0.0373421	1	N	Not Sig	ncbiRefSeq	SHOC2 leucine-rich repeat scaffold protein [Source:RGD Symbol;Acc:1308146]	CTATTCTTGTAAAAACATGGTTTTTCAAAATGAAAATATATGAAAAAATGTTAAACAATT
chr1	Shoc2	+	253048819	3UTR	none	0.564338	0.486494	1	N	Not Sig	ncbiRefSeq	SHOC2 leucine-rich repeat scaffold protein [Source:RGD Symbol;Acc:1308146]	TGGTATCTGATGCCCTCTTCTGGTGTGTTTAAAGACAGCTACAGTGTACTCATACACATA
chr1	Shprh	+	5602534	3UTR	AATAAA	-0.316747	0.547984	1	N	Not Sig	ncbiRefSeq	SNF2 histone linker PHD RING helicase [Source:RGD Symbol;Acc:1310342]	AGAAAAACTACTCTTATTTATTTCAGTAAGATACCTCAAATAAATATTTTAGTGAAAAAT
chr1	Shtn1	-	258121965	unassigned	none	0.0793793	0.891646	1	N	Not Sig	ncbiRefSeq	shootin 1 [Source:RGD Symbol;Acc:1311558]	ATCAATCTGTCTACAGTTAGCATATCGTCTAGCGGTATTAGTCAGTCAGGGAAGCACACG
chr1	Sigirr	-	196199447	intron	AATAAG	-1.10378	0.457491	1	N	Not Sig	ncbiRefSeq	single Ig and TIR domain containing [Source:RGD Symbol;Acc:1306732]	AAAAGGAAGAGTCAGGGTCTCATGACAGAAGCAATAAGAGGCATAGCAGTTACCACCCAG
chr1	Siglec5	+	93773710	CDS	CATAAA	0.688942	1	1	N	Not Sig	ncbiRefSeq	sialic acid binding Ig-like lectin 5 [Source:RGD Symbol;Acc:1305432]	CCTTGTCTCCACCATAAATAGTGCAAGCATGATTTCGTCCAACATTCCATTGAGATACCC
chr1	Siglec5	+	93776694	3UTR	AATAAA	0.0638523	1	1	N	Not Sig	ncbiRefSeq	sialic acid binding Ig-like lectin 5 [Source:RGD Symbol;Acc:1305432]	ACATACAGAAAGGTGACCAATCAGTGCTTGTCAACGAAATATAAATAAATACAGTACACC
chr1	Sipa1l3	-	84618713	unassigned	none	0.058395	0.794456	1	N	Not Sig	ncbiRefSeq	signal-induced proliferation-associated 1 like 3 [Source:RGD Symbol;Acc:1311432]	GAGCCTATGAGGAGGGAGCCAGCACTGACTTTCGGGCAGCTGCCAGAGAGCACACCAGCC
chr1	Sirt2	+	84076975	3UTR	ATTAAA	0.322746	0.292555	1	N	Not Sig	ncbiRefSeq	sirtuin 2 [Source:RGD Symbol;Acc:621481]	GTGGGCAAGCCGGAGGGCAAGTTGATTAGAAACAAATTAAAACTCAGAACAAAGCAACTA
chr1	Sirt3	-	195942065	unassigned	AATGAA	0.114833	0.847965	1	N	Not Sig	ncbiRefSeq	sirtuin 3 [Source:RGD Symbol;Acc:1308374]	TACCCACACAACCTGAAATATGTCAACACTTACTATCCCAAAGAGACAAATGAAAGGATG
chr1	Slc12a7	-	29472691	unassigned	AACAAG	-0.657445	0.397528	1	N	Not Sig	ncbiRefSeq	solute carrier family 12 member 7 [Source:RGD Symbol;Acc:1359672]	AAGGAATGAGCAAGTGCATCTTCCCCCACCCCTGTACTCTACGGAAACAAGACACACGGA
chr1	Slc15a3	+	207507158	3UTR	CATAAA	0.00784354	0.836063	1	N	Not Sig	ncbiRefSeq	solute carrier family 15 member 3 [Source:RGD Symbol;Acc:628663]	TGTACCCAACATTAGAATGAAGTGGTTCCCATAAATAAGGGGCATGCGCCCTCCCTCTTG
chr1	Slc17a6	+	101252542	3UTR	AATAAA	-0.682901	0.229315	1	N	Not Sig	ncbiRefSeq	solute carrier family 17 member 6 [Source:RGD Symbol;Acc:620531]	TAAAAAGATGTGAACTGTCATTTTGTTGCTGCGAAGCAAGTGTTAATAAAATGTTCTATT
chr1	Slc17a7	+	95661591	3UTR	AATAAA	0.0565878	0.640419	1	N	Not Sig	ncbiRefSeq	solute carrier family 17 member 7 [Source:RGD Symbol;Acc:620101]	TCTGTGACCGTAAATCCTGCCCTGCCCCACCCCACTCCCAATAAATGCTTTGGTGTACAG
chr1	Slc18a2	+	258449142	3UTR	AATAAA	1.50081	0.0155166	0.614656	N	Not Sig	ncbiRefSeq	solute carrier family 18 member A2 [Source:RGD Symbol;Acc:3694]	GCTAAGTGTATCTGTGCTGGTTGCACTTTAGTGAGATTACTTAATAAATCTTCTTCAACA
chr1	Slc18b1	-	21628231	unassigned	AATGAA	0.0751187	0.883972	1	N	Not Sig	ncbiRefSeq	solute carrier family 18 member B1 [Source:RGD Symbol;Acc:1306962]	GTAACCCCCATGAGGTACTTGAGATCTTGTTTCAAAATTGTTTTGAATGAATACAACGAA
chr1	Slc1a1	+	226631924	exon	AATAAA	0.324396	0.456614	1	N	Not Sig	ncbiRefSeq	solute carrier family 1 member 1 [Source:RGD Symbol;Acc:3696]	TGTTATCTCAAGAGGACGCGTTCCATTTTTCTCAATAAACATCTCCCACACTTTCTCCCT
chr1	Slc1a5	+	77470950	3UTR	AATAAA	0.0180016	1	1	N	Not Sig	ncbiRefSeq	solute carrier family 1 member 5 [Source:RGD Symbol;Acc:708512]	GAAAGCCAAAAATAAATGTCACTCCAAATCACATTTTTTAGCAATAAAATGGTGTCAAAT
chr1	Slc22a12	-	203845038	unassigned	none	-2.63316	0.238968	1	N	Not Sig	ncbiRefSeq	solute carrier family 22 member 12 [Source:RGD Symbol;Acc:621628]	GATGCTCCCTCTCGCCTCCCATCCTTCCTTTTTCTTCTCCCTTTCTTTTTCCTCCTTTTC
chr1	Slc22a3	+	48324606	3UTR	AATAAA	-2.08121	0.189988	1	N	Not Sig	ncbiRefSeq	solute carrier family 22 member 3 [Source:RGD Symbol;Acc:3701]	GCCTTTGGATTGCATTTCAAGTTGGAAGTTCTGTTTCATAACAATAAACAATTTTTAAAC
chr1	Slc22a6	+	205531173	3UTR	ATTAAA	0.105329	1	1	N	Not Sig	ncbiRefSeq	solute carrier family 22 member 6 [Source:RGD Symbol;Acc:69338]	GGTCACTCCGCCACCTCCAGGACCTTGCAAAGAATCTCAGACAATTAAATGAATCTCTTC
chr1	Slc22a8	+	205516377	intron	AATAAA	-0.0619699	0.988158	1	N	Not Sig	ncbiRefSeq	solute carrier family 22 member 8 [Source:RGD Symbol;Acc:632286]	TCTTACCTTGCCCAAACTCTCTCCTTGGTGGGAAATTTCAATAAACCACAATGAAGAACT
chr1	Slc25a22	-	196528470	unassigned	none	-0.159444	0.47726	1	N	Not Sig	ncbiRefSeq	solute carrier family 25 member 22 [Source:RGD Symbol;Acc:1307826]	TAGTGTCATAGTCCGCCCTCTCCTCATTGTCCCACCCAAGCACAGACTCTTAAAGCAAAC
chr1	Slc25a28	-	242530876	unassigned	none	0.114011	0.818968	1	N	Not Sig	ncbiRefSeq	solute carrier family 25 member 28 [Source:RGD Symbol;Acc:1584155]	TCTAAGTCAGGTCAGGAACAGCACTGCGTGCCCCTTTTGGCAAGACAAACCCAACACAAC
chr1	Slc25a45	+	203174471	3UTR	AATAAA	0.126832	0.858096	1	N	Not Sig	ncbiRefSeq	solute carrier family 25, member 45 [Source:RGD Symbol;Acc:1589953]	GGTCAAGGTCATACTTCTGTCTCTTGAACAGATACATGCAATAAAGTTTCATTTGATGCA
chr1	Slc29a2	+	202335184	3UTR	AGTAAA	0.282393	0.667277	1	N	Not Sig	ncbiRefSeq	solute carrier family 29 member 2 [Source:RGD Symbol;Acc:69296]	CATCTCCTCACCCCATTTCTCCTCACTCTGTTCCCGCATCCAGTAAAAAGTGTTCATTTC
chr1	Slc2a12	-	22803067	3UTR	TATAAA	0.192677	0.656182	1	N	Not Sig	ncbiRefSeq	solute carrier family 2 member 12 [Source:RGD Symbol;Acc:1310175]	GATTTTACTTCAACCTTTGCTGTAATATAAAAAGGAAGTTTACAAGACATGACATTGCTG
chr1	Slc35d3	-	14569686	intron	none	0.943203	0.619933	1	N	Not Sig	ncbiRefSeq	solute carrier family 35, member D3 [Source:RGD Symbol;Acc:1309428]	GCTCCCAATCGCCCAACGGAACACAGCGTGACTGAAACACACTTGAACGCTCCCCCGCTC
chr1	Slc3a2	-	205604467	unassigned	AATAAA	0.166922	0.556864	1	N	Not Sig	ncbiRefSeq	solute carrier family 3 member 2 [Source:RGD Symbol;Acc:3073]	AATAAAACAAGAAGAAGAGAAAGTCCTTCTATGATAAAGGAAGAAGGAAAGACACGACCT
chr1	Slc5a11	+	177795192	3UTR	AATAAA	0.982258	0.898728	1	N	Not Sig	ncbiRefSeq	solute carrier family 5 member 11 [Source:RGD Symbol;Acc:621410]	GGATACTTTGCGTAACTCAGGGTGAGCCAGGAAACGATAATAAAGCTGTGTGTTTACCTT
chr1	Slc5a2	+	182853306	3UTR	AATAAA	0.117655	0.929629	1	N	Not Sig	ncbiRefSeq	solute carrier family 5 member 2 [Source:RGD Symbol;Acc:620217]	AAGATGGTGGCCAATTTGTCATAGATGTTTGCCTATGCAAAAATAAAGCTGCCCTTCTAA
chr1	Slc7a10	+	87845071	3UTR	AATAAA	-0.162469	0.933021	1	N	Not Sig	ncbiRefSeq	solute carrier family 7 member 10 [Source:RGD Symbol;Acc:621672]	AATGCCCTGCTAGCTTCTCCAGAAAAGTCTGTAAATAAACAGGGCTGGTTGTTCTGTGTG
chr1	Slc8a2	+	76847192	intron	none	0.452472	0.563443	1	N	Not Sig	ncbiRefSeq	solute carrier family 8 member A2 [Source:RGD Symbol;Acc:620194]	TCCCTCAAGTCACGAACCTCCACCTGTGTCCCCAGGTCTTAGAACATCTCCCTAGGTACC
chr1	Slc8a2	+	76852928	3UTR	none	0.388289	0.704197	1	N	Not Sig	ncbiRefSeq	solute carrier family 8 member A2 [Source:RGD Symbol;Acc:620194]	CCTGCACTCTGGTACACACACACACACACACACACACACACACACACACACTTTAAAATA
chr1	Slco2b1	-	153959287	unassigned	GATAAA	0.128018	0.674787	1	N	Not Sig	ncbiRefSeq	solute carrier organic anion transporter family, member 2b1 [Source:RGD Symbol;Acc:621391]	GTGTGGCTGACGCAAACCTCTAATGCAGTTTAGAAGGATAAATTTTTGTCGTGGGAGAGG
chr1	Slf2	+	243833547	CDS	AATAAT	-0.0177422	1	1	N	Not Sig	ncbiRefSeq	SMC5-SMC6 complex localization factor 2 [Source:RGD Symbol;Acc:1560300]	GTGATTATTTCAAAGCTTTTGGATGAAAAACATGAAGATATTCCTAATGCCAATAATCTT
chr1	Slf2	+	243844609	3UTR	none	2.73046	0.0119624	0.51507	N	Not Sig	ncbiRefSeq	SMC5-SMC6 complex localization factor 2 [Source:RGD Symbol;Acc:1560300]	CAGAAGGTTGGCTTTTTTTTTTTTTTAATGCAAGTAGTAGCTTGCTTTTGACTTCACAAA
chr1	Slf2	+	243845408	3UTR	AATAAA	-0.0472649	0.960635	1	N	Not Sig	ncbiRefSeq	SMC5-SMC6 complex localization factor 2 [Source:RGD Symbol;Acc:1560300]	AGTTCTCCACAGTTCATGTTTACATAACGCAATTAATAAATTTACTGTGTACTTTACAGT
chr1	Slit1	-	240409558	unassigned	none	-0.142133	1	1	N	Not Sig	ncbiRefSeq	slit guidance ligand 1 [Source:RGD Symbol;Acc:69307]	GGTAGCAGGTAGAGGAGTGCCACCATTCTGCCACCGTTTGTGGCCTGACCTCACACACAC
chr1	Slk	+	246529642	3UTR	AATAAA	-0.124653	0.790406	1	N	Not Sig	ncbiRefSeq	STE20-like kinase [Source:RGD Symbol;Acc:3780]	GGATCAGAAACATGCCTTTTCAATCATGGGATTGTTAAACAATAAAATTATTTCTTAATC
chr1	Slx1b	-	181286189	unassigned	AATAGA	-0.779849	0.17669	1	N	Not Sig	ncbiRefSeq	SLX1 homolog B, structure-specific endonuclease subunit [Source:RGD Symbol;Acc:1311568]	GTTCACCCGTAGAACATCCCATGACCTCAGTATCCCACGCGTCTCCAGACCAATAGAGGA
chr1	Slx1b	-	181286962	3UTR	AGTAAA	-0.0979174	0.621878	1	N	Not Sig	ncbiRefSeq	SLX1 homolog B, structure-specific endonuclease subunit [Source:RGD Symbol;Acc:1311568]	GGGTTAGCAGAGTAAAGACCAGTGAGGCACAAAGGAAATCCGGTCAGCAGGACACAGTAG
chr1	Slx1b	-	181287948	3UTR	none	0.164299	0.825571	1	N	Not Sig	ncbiRefSeq	SLX1 homolog B, structure-specific endonuclease subunit [Source:RGD Symbol;Acc:1311568]	ATGCCAAAGCTTCCACTTCACTTCTTGCCTTCCGGCCCCTCTCTGAGAAAACATCAGAAG
chr1	Smarca2	+	224358639	3UTR	AATAAA	0.021569	0.941318	1	N	Not Sig	ncbiRefSeq	SWI/SNF related, matrix associated, actin dependent regulator of chromatin, subfamily a, member 2 [Source:RGD Symbol;Acc:1302988]	CACAATGTCTTTGGTTGCAAGTCATAAGAGCCTGAGGCAAATAAAATTCCAGTAATTTCC
chr1	Smc3	+	252644521	3UTR	AATAAA	-0.20017	0.747252	1	N	Not Sig	ncbiRefSeq	structural maintenance of chromosomes 3 [Source:RGD Symbol;Acc:62006]	GTAAATGTGGCCTTTTGTCTTTGTAATTGTTAGAAACATTCAATAAATATTTTGCATAAG
chr1	Smc5	-	220796886	exon	none	0.227247	1	1	N	Not Sig	ncbiRefSeq	structural maintenance of chromosomes 5 [Source:RGD Symbol;Acc:1307492]	GTCATAACTAAGTCAAGGGAACCAACCTTTAGCTGTTCTTCCAAGTGTCTCCTTTGCTCT
chr1	Smg1	-	172441891	unassigned	AATAAA	-0.155075	0.774973	1	N	Not Sig	ncbiRefSeq	SMG1, nonsense mediated mRNA decay associated PI3K related kinase [Source:RGD Symbol;Acc:1563508]	CACAAAATTGTATTCCAAAACAAACTTTCTGGGATCCACTTCAATAAATTCAGAGCCTAG
chr1	Smg9	+	80011262	3UTR	AATAAA	0.297969	0.580466	1	N	Not Sig	ncbiRefSeq	SMG9 nonsense mediated mRNA decay factor [Source:RGD Symbol;Acc:1309888]	CTGGAGAGCTTTTCACGGGCGAGGATCTGATGGTTCAAATAAACGTGGTCATAGGAGCCT
chr1	Smim17	-	67442269	unassigned	AATAAA	-0.0679841	0.546192	1	N	Not Sig	ncbiRefSeq	small integral membrane protein 17 [Source:RGD Symbol;Acc:1559613]	AATTTCAAATTATTGAATTGGCTAAAGGAAATCATTTCTCACGCAATAAAAGAGTCAGAA
chr1	Smndc1	-	252389674	unassigned	none	-0.476278	0.18027	1	N	Not Sig	ncbiRefSeq	survival motor neuron domain containing 1 [Source:RGD Symbol;Acc:1309151]	TCTAAGGCTTACTCCACCAGATGGCAGGAGCTGCAGATCGCACCCCTTTGTTAACACACT
chr1	Smndc1	-	252390167	exon	AATAAA	-0.0547985	0.886462	1	N	Not Sig	ncbiRefSeq	survival motor neuron domain containing 1 [Source:RGD Symbol;Acc:1309151]	AACGGGTAGCACTACCACAAGTGAAGTCAACAAAGGAAAACACCAAATAAACAGAGAAGG
chr1	Smoc2	+	55391803	3UTR	ATTAAA	0.113966	0.865493	1	N	Not Sig	ncbiRefSeq	SPARC related modular calcium binding 2 [Source:RGD Symbol;Acc:1306681]	CTTTTATATTGCTGAACTCTGAATTTAATCATTTTTATTAGATTAAAATATGCGATTAAA
chr1	Smpd1	+	159896788	3UTR	AATAAA	-0.1006	0.856783	1	N	Not Sig	ncbiRefSeq	sphingomyelin phosphodiesterase 1 [Source:RGD Symbol;Acc:1549719]	TCTGAACTCTGTACTGTTACCTGATCCTGCCAGGCTGTTAAAATAAAGAGACTCATACTT
chr1	Snrnp70	-	95856038	unassigned	none	0.229392	0.835135	1	N	Not Sig	ncbiRefSeq	small nuclear ribonucleoprotein U1 subunit 70 [Source:RGD Symbol;Acc:1307120]	CACTAGGAACAGTATACCAAGTGGAGCTGAACAGTATGAAGTGTAGTAAGACACCAAGTG
chr1	Snrnp70	-	95862116	exon	none	0.759097	0.680433	1	N	Not Sig	ncbiRefSeq	small nuclear ribonucleoprotein U1 subunit 70 [Source:RGD Symbol;Acc:1307120]	CCAACCCAGAAAACAGCAAGAAGACCGTGTAATTGTGTCAGTCTAGGCTTCTCTCTCTTT
chr1	Snrpa	-	82481769	unassigned	AATAAA	0.101815	0.924763	1	N	Not Sig	ncbiRefSeq	small nuclear ribonucleoprotein polypeptide A [Source:RGD Symbol;Acc:1307416]	ATCCAAACTCTTGATGTGGAAGGAAACAAGTTAGGCAAGAAAATAAAGCGGACAAGACTG
chr1	Snrpa	-	82481900	3UTR	none	0.688942	1	1	N	Not Sig	ncbiRefSeq	small nuclear ribonucleoprotein polypeptide A [Source:RGD Symbol;Acc:1307416]	CTGGGTACAATGCTGTGTGGCAGACACACACTCACTCACGGCTCTGAGAAGGCCCCCAAG
chr1	Snrpa1	+	119654653	3UTR	AATAAA	0.101472	0.870888	1	N	Not Sig	ncbiRefSeq	small nuclear ribonucleoprotein polypeptide A' [Source:RGD Symbol;Acc:2320494]	TGAAATGGCAATGCCAATTTTCTACAAATGGTAAATAAAGGCAACCTACTGTGCTGCCAA
chr1	Snrpd2	+	78801225	3UTR	AATAAA	0.126139	0.735039	1	N	Not Sig	ncbiRefSeq	small nuclear ribonucleoprotein D2 polypeptide [Source:RGD Symbol;Acc:1593018]	GCCAAGTCCCGCAGAGCCCTGCCCAATGAGCTAGAAATAAAACCCTGTGCTTTTTGTTTT
chr1	Snrpn	-	111101326	unassigned	AAGAAA	0.00894482	0.93505	1	N	Not Sig	ncbiRefSeq	small nuclear ribonucleoprotein polypeptide N [Source:RGD Symbol;Acc:621306]	CCAAATCACAATAAGTTTCACTCTAACTTTAACAAAATCAGCAGACAAAGAAAAACCTCA
chr1	Snurf	-	111101326	unassigned	AAGAAA	0.00901594	0.915658	1	N	Not Sig	ncbiRefSeq		CCAAATCACAATAAGTTTCACTCTAACTTTAACAAAATCAGCAGACAAAGAAAAACCTCA
chr1	Snurf	-	111103089	3UTR	CATAAA	-1.11726	0.454537	1	N	Not Sig	ncbiRefSeq		ATTGTTATTTATCATAAAGCCCTTACCTGGAGGTGGGGTTGCTCTGCCTACAGGTGGAGG
chr1	Snurf	-	111114459	intron	none	0.0334336	0.981995	1	N	Not Sig	ncbiRefSeq		CTTAAGTTCCAGATACCTTATTCTTTTTTTTTTACTTTTGTTTATTTTGGAATTAATTCT
chr1	Snx15	-	203417028	unassigned	AATAAG	0.16128	0.712519	1	N	Not Sig	ncbiRefSeq	sorting nexin 15 [Source:RGD Symbol;Acc:1305803]	TATTCAACTCTGTTAGACGATGTAAACGCAACCACAGACAATAATAAGCAAACGGATCTG
chr1	Snx32	-	202801089	3UTR	none	0.362268	0.168922	1	N	Not Sig	ncbiRefSeq	sorting nexin 32 [Source:RGD Symbol;Acc:1560591]	TCCTCTTGGGTTGAAGCAGACCAAGTCCCGTCCTAGGCACCCAGTTTGGGGGGAGCCTGT
chr1	Snx32	-	202802390	intron	AGTAAA	0.0205113	0.927584	1	N	Not Sig	ncbiRefSeq	sorting nexin 32 [Source:RGD Symbol;Acc:1560591]	ATTTAATAGAGGAGAGGTCATGTGGTTTCCAGGTCTTGTGGGGAAGTAAAGGCAAGTGGA
chr1	Snx9	+	46510096	3UTR	AATAAA	-0.217881	0.797877	1	N	Not Sig	ncbiRefSeq	sorting nexin 9 [Source:RGD Symbol;Acc:1584466]	TTACATAAATGTAAGAGCATGTAGAAGCCAATATATAAATAAATTGTTTTTAAAAACTGT
chr1	Sod2	-	47638317	unassigned	AATGAA	0.0702125	0.6742	1	N	Not Sig	ncbiRefSeq	superoxide dismutase 2 [Source:RGD Symbol;Acc:3732]	CCCAACAATTTCTTCTGTCTTCCATGGGGACAATGAACAGAACATACACAGACACACATA
chr1	Sod2	-	47639218	3UTR	AATAAA	0.698063	0.166545	1	N	Not Sig	ncbiRefSeq	superoxide dismutase 2 [Source:RGD Symbol;Acc:3732]	CATAAATAAAGACCACTAGGTGATATCCGCTAAACAAAGGATTACTTATGAAAAATAGCA
chr1	Sod2	-	47639450	3UTR	AATGAA	0.446224	0.348173	1	N	Not Sig	ncbiRefSeq	superoxide dismutase 2 [Source:RGD Symbol;Acc:3732]	GTCCAAGCAATTCAAGCCTCTAATGAAAATGTTCAATCAAGAGCAGCTCACACCAAGTAT
chr1	Soga3	-	28641096	intron	ATTACA	-0.844391	0.570775	1	N	Not Sig	ncbiRefSeq	SOGA family member 3 [Source:RGD Symbol;Acc:11479453]	GATACATAGACCGTGTCAAGGTCCGAACATTATTTACTTTCAAGAGAGTTACATTTCATC
chr1	Soga3	-	28641442	3UTR	AGTAAA	0.176124	1	1	N	Not Sig	ncbiRefSeq	SOGA family member 3 [Source:RGD Symbol;Acc:11479453]	AGAAAGGAAAGCAGCAGAAAAATGAGTTAACACAAAACTCTGACAACTCTCACTTTTCCT
chr1	Sorbs1	-	239107881	unassigned	AATGAA	0.0526233	0.955825	1	N	Not Sig	ncbiRefSeq	sorbin and SH3 domain containing 1 [Source:RGD Symbol;Acc:1586598]	CCTGGAGCAGGGGCGGGGCCTCACGGGAAGAACCAACCAATGAAGGGCGAAAACACTAAG
chr1	Sorcs1	-	249080661	unassigned	TATAAA	0.27515	1	1	N	Not Sig	ncbiRefSeq	sortilin-related VPS10 domain containing receptor 1 [Source:RGD Symbol;Acc:1305910]	TATAAATGTTGTTATTCATATTCTATAAGATTGTGTATATATGTATTCGTGTGTACATAC
chr1	Sorcs1	-	249085099	intron	ATTAAA	-0.378517	0.506157	1	N	Not Sig	ncbiRefSeq	sortilin-related VPS10 domain containing receptor 1 [Source:RGD Symbol;Acc:1305910]	TTATTTTTTTAAAAAATCCAGACCGTGTTTTGGAATTAAATGAACACATTGAGGCCAAGA
chr1	Sorcs3	+	247734026	3UTR	AATAAA	-0.280112	0.825777	1	N	Not Sig	ncbiRefSeq	sortilin-related VPS10 domain containing receptor 3 [Source:RGD Symbol;Acc:1310974]	GTAAAAAAAGACAGTGGTTTTGAAATTGTTGAAAATAAATGTATTTTTGTACATCAAAGC
chr1	Sox6	-	169723305	unassigned	none	1.02475	0.0647717	1	N	Not Sig	ncbiRefSeq	SRY-box transcription factor 6 [Source:RGD Symbol;Acc:1309000]	GGGTCTTGCTGTACTCTGTGGAGGAAGGGTTTCAGGGCACAGACTAAGCCAAACACGGAG
chr1	Spaca6	+	58687964	CDS	AGTAAA	-0.393382	0.473302	1	N	Not Sig	ncbiRefSeq	sperm acrosome associated 6 [Source:RGD Symbol;Acc:1588836]	AAATGATCCAGCCCTGGAGGCCCAGCCTAGGCGAACTACTTACCAGACCCCAGGCTCTGA
chr1	Spaca6	+	58688553	3UTR	AATAAA	-0.403607	0.790939	1	N	Not Sig	ncbiRefSeq	sperm acrosome associated 6 [Source:RGD Symbol;Acc:1588836]	AAGTGGCAACTAACAAATCCTGACCCTACATCTGTCCTGGAAATAAAGTTTGTATTTTAG
chr1	Spaca6	+	58689307	3UTR	none	-0.631366	1	1	N	Not Sig	ncbiRefSeq	sperm acrosome associated 6 [Source:RGD Symbol;Acc:1588836]	ACCAGAGGTCAATACCACTGCCGTTTGTCAGTCAATTCACTTGGTTCTCCTTTTGTTTTG
chr1	Spata6l	-	226641516	intron	AATAAA	0.115324	0.823231	1	N	Not Sig	ncbiRefSeq	spermatogenesis associated 6-like [Source:RGD Symbol;Acc:1310039]	CTACTTTTCATGCTCAAAATAAACACAGTGGAAGACACAAATTCTCCAGGCGACAAGTGA
chr1	Spcs2	-	154163723	unassigned	AATACA	-0.0823999	0.922829	1	N	Not Sig	ncbiRefSeq	signal peptidase complex subunit 2 [Source:RGD Symbol;Acc:1311253]	GCATGAGTTTCAGGCGAGTCTTGACAACATAATGAGAATTCCATCTTGAAACACAGGAAA
chr1	Spcs2	-	154165192	3UTR	AGTAAA	0.255763	0.462413	1	N	Not Sig	ncbiRefSeq	signal peptidase complex subunit 2 [Source:RGD Symbol;Acc:1311253]	GACTCCATCCGAGTAAAGCATTTGCGGTGCTGTTCCTCCTTCCAAGACTAGTACTCTATA
chr1	Spcs2	-	154165292	3UTR	AATAAA	-0.49556	0.650114	1	N	Not Sig	ncbiRefSeq	signal peptidase complex subunit 2 [Source:RGD Symbol;Acc:1311253]	AATGGCAGTTAATAAAGGGCACACACAAATCAACAGGAACGTACGAGTGGGAACAGAGAA
chr1	Sphk2	-	96180871	unassigned	none	-0.0479656	0.926797	1	N	Not Sig	ncbiRefSeq	sphingosine kinase 2 [Source:RGD Symbol;Acc:1307757]	GCTACTGCTCTCCTTATAGGACCACAATAACTGAAAGGGGTGTCAGAGGGAAGGGTGCAG
chr1	Spindoc	-	204541646	unassigned	ATTATA	-0.16567	1	1	N	Not Sig	ncbiRefSeq	spindlin interactor and repressor of chromatin binding [Source:RGD Symbol;Acc:1308106]	CAAAACTGTCATTAATTATATGAGAAAAAGGCCACACAGAACCAACACCTAGAGACCAAC
chr1	Spindoc	-	204542821	3UTR	none	0.333058	0.557125	1	N	Not Sig	ncbiRefSeq	spindlin interactor and repressor of chromatin binding [Source:RGD Symbol;Acc:1308106]	GTTTCCTGCCCCTCAAGCTGCTCTAAGAATACTCCCTTTTCCCAATGACAGCCCACACAG
chr1	Spint2	-	84558158	unassigned	AAGAAA	0.541122	0.179162	1	N	Not Sig	ncbiRefSeq	serine peptidase inhibitor, Kunitz type, 2 [Source:RGD Symbol;Acc:735123]	AGTCCTGAGATGAACCTTGGCACCTGTAATCAGTAGTCATAAGAAACAAAAATTACATAG
chr1	Spn	-	181746936	unassigned	AAGAAA	0.636845	0.550568	1	N	Not Sig	ncbiRefSeq	sialophorin [Source:RGD Symbol;Acc:3750]	CTGTCTCCGCAGCTCTCTTCCAACCACACCCTCCATGGCTCTCTAAGAAACGTCTGCTTC
chr1	Spns1	-	180942087	unassigned	none	0.225483	0.5857	1	N	Not Sig	ncbiRefSeq	sphingolipid transporter 1 [Source:RGD Symbol;Acc:1305613]	GGCTACAGATATTTCCCTGAAGCCAGTGGCAGCCACAGAGAGACAAGCAGTCAGTCGGGA
chr1	Spon1	+	168228237	3UTR	ATTAAA	0.160721	0.505121	1	N	Not Sig	ncbiRefSeq	spondin 1 [Source:RGD Symbol;Acc:619918]	ACAACCCCTGAATATGTATTTTTCCTTAACACAAGAGAGCCTGTTCAATTAAAAAAAAAA
chr1	Spred3	-	84458778	unassigned	AATAAA	0.10098	0.882098	1	N	Not Sig	ncbiRefSeq	sprouty-related, EVH1 domain containing 3 [Source:RGD Symbol;Acc:1311713]	TCAAGCCCTTCGGGTAAAAAAGGGCACAGGGCGCGCCAACACGAATAAAGACCAGGCTGA
chr1	Sprn	-	194944601	unassigned	none	-0.273056	0.451061	1	N	Not Sig	ncbiRefSeq	shadow of prion protein [Source:RGD Symbol;Acc:1561845]	CCTGGAGTTCCTAAGTCAGATTCTCAAGTGCCTCAAAGCCCCGCAATGAGGGAAAAGCCT
chr1	Sptbn2	+	202043610	3UTR	ATTAAA	0.337012	0.315369	1	N	Not Sig	ncbiRefSeq	spectrin, beta, non-erythrocytic 2 [Source:RGD Symbol;Acc:3751]	GGAGTAGCCACATCCTTGAGTCTATCCAAGGAGGTGATTAAACAGCTCGGCTTCTCTCAC
chr1	Sptbn2	+	202045340	3UTR	ATTAAA	0.19383	0.562761	1	N	Not Sig	ncbiRefSeq	spectrin, beta, non-erythrocytic 2 [Source:RGD Symbol;Acc:3751]	CAATTTTTATATTGATCTCATGTCAAAATGTCAAAAATATTAAATAGATTTCAAGTTTTT
chr1	Sptbn4	-	82650749	unassigned	AACAAA	-0.646964	0.50246	1	N	Not Sig	ncbiRefSeq	spectrin, beta, non-erythrocytic 4 [Source:RGD Symbol;Acc:1304682]	GCCTCGTCCCCCACCAGCCCACCCTCCAATCCTATCTCAGATATGAGAACAAACCAGCGT
chr1	Spty2d1	-	97531494	unassigned	AATAAA	2.39693	3.01024e-10	1.04171e-07	Y	FDR<0.05	ncbiRefSeq	SPT2 chromatin protein domain containing 1 [Source:RGD Symbol;Acc:2319415]	AGTACAGTATTCCAGGTGAGAAGGAGTAGCTTCAAGTTCTGTCAATAAATGAGAACCAGT
chr1	Srcap	+	182172643	3UTR	AATAAA	0.265438	0.585845	1	N	Not Sig	ncbiRefSeq	Snf2-related CREBBP activator protein [Source:RGD Symbol;Acc:1565642]	TTTTTTTTTCTTTTTTTTTTAAGAAAAAAAAAAAATAATAAACTTAGTTTCTGTACAAGC
chr1	Srd5a1	+	33720468	3UTR	AATAAA	-0.0654447	0.624631	1	N	Not Sig	ncbiRefSeq	steroid 5 alpha-reductase 1 [Source:RGD Symbol;Acc:3757]	ACTTACTTGTATGAACCATGATTGTTAAGGAAATTAATAAACTACATTTATAAGTACAGA
chr1	Ssh3	-	201557166	unassigned	none	0.383375	0.569947	1	N	Not Sig	ncbiRefSeq	slingshot protein phosphatase 3 [Source:RGD Symbol;Acc:1308679]	AGACAAAATGCAGAGAAGATTCTGACCGAATGACAGACGGCTTTGTCACAAAGGGAAAAC
chr1	Ssh3	-	201559412	CDS	none	0.401849	0.795505	1	N	Not Sig	ncbiRefSeq	slingshot protein phosphatase 3 [Source:RGD Symbol;Acc:1308679]	TACCTGGCAGTCAGAATGCCCTGGTAGGTCTGTAGCTGGCGCAGGAAGCCAGGGTTGGGG
chr1	Stambpl1	+	231739164	CDS	none	0.0363936	0.936026	1	N	Not Sig	ncbiRefSeq	STAM binding protein-like 1 [Source:RGD Symbol;Acc:1583011]	GGTGCCAAAGCAGTCTGCTGGCCCAGACTATTGCGACGTGGAGAATGTAGAAGAATTATT
chr1	Stambpl1	+	231743518	CDS	CATAAA	0.0131292	0.934868	1	N	Not Sig	ncbiRefSeq	STAM binding protein-like 1 [Source:RGD Symbol;Acc:1583011]	GCTCCTATCAGCTTATGTTGCCAGAGGCCATTGCCATCGTGTGTTCCCCAAAGCATAAAG
chr1	Stambpl1	+	231745033	3UTR	AATAAA	0.0198827	0.941175	1	N	Not Sig	ncbiRefSeq	STAM binding protein-like 1 [Source:RGD Symbol;Acc:1583011]	CTATACCTGTGAATATACCCAAATGATGCCATCAGAAATAAATTGTGCTGCAGATAACAA
chr1	Stard10	+	155747094	3UTR	AATAAA	0.266149	0.830558	1	N	Not Sig	ncbiRefSeq	StAR-related lipid transfer domain containing 10 [Source:RGD Symbol;Acc:1306548]	TCCTGCTCAGGTGGCTGCGGCATGGCTGGACATGGCCCCAATAAATGAACCACACAGCCC
chr1	Stard10	+	155748007	3UTR	ATTAAA	-1.99481	0.121096	1	N	Not Sig	ncbiRefSeq	StAR-related lipid transfer domain containing 10 [Source:RGD Symbol;Acc:1306548]	TGTTTTTTTGTTTTTTTGTTTTTTTTTTTAAATTAAACAGAACCAATTGCTCATCACTGG
chr1	Stard5	+	137616017	3UTR	none	0.19376	0.835797	1	N	Not Sig	ncbiRefSeq	StAR-related lipid transfer domain containing 5 [Source:RGD Symbol;Acc:1561783]	TTTTAGCACGAGACTTTCCCCCTTTACAAAGGTGTCAACTTGAAAAATGTTTTAAACCAC
chr1	Stim1	+	156818776	3UTR	AATAAA	0.17357	0.533137	1	N	Not Sig	ncbiRefSeq	stromal interaction molecule 1 [Source:RGD Symbol;Acc:1306831]	GGGTTTTTCTGTGTTATTTTCATAAGATTCTTTGAAGTCCAATAAAGCATGTAGGAGATT
chr1	Stip1	-	204209433	unassigned	none	0.000882393	0.880527	1	N	Not Sig	ncbiRefSeq	stress-induced phosphoprotein 1 [Source:RGD Symbol;Acc:621599]	TGTTAGCTTCCAATTCAGCACTACTGTGTCTTAGGAGAAGAACGTCACTGGAGACCAAAA
chr1	Stk32c	-	193900717	unassigned	AACAAA	0.0764005	0.624072	1	N	Not Sig	ncbiRefSeq	serine/threonine kinase 32C [Source:RGD Symbol;Acc:1305864]	TGCAGACACTGGATGCCATCCCTCCACAGGCATATAACAAACACACAGAGCACGCAACAC
chr1	Strn4	+	77504189	3UTR	none	0.437079	0.611599	1	N	Not Sig	ncbiRefSeq	striatin 4 [Source:RGD Symbol;Acc:1307030]	GTTCCCTGGCCTTCCACCACAGCCAGTCAGCACTGCTTACTGCCTCTGAGGATGGCACAC
chr1	Strn4	+	77511861	3UTR	AATAAA	0.0125522	0.73629	1	N	Not Sig	ncbiRefSeq	striatin 4 [Source:RGD Symbol;Acc:1307030]	TTCCTTTTTGTCCCAACTTGTATGTGAAAAAAAACTGTCTCAATAAACCCTTTGGAGTAA
chr1	Stx1b	-	182417997	intron	none	0.228899	0.52106	1	N	Not Sig	ncbiRefSeq	syntaxin 1B [Source:RGD Symbol;Acc:3784]	AAGACCCAACACACACACACACACATACACACACACACACACACACACACACACACACAC
chr1	Stx1b	-	182418336	3UTR	none	1.39837	0.144616	1	N	Not Sig	ncbiRefSeq	syntaxin 1B [Source:RGD Symbol;Acc:3784]	TGTATGGGCACAGATCTACACACACACACACACACACACACACACACACACACACACACA
chr1	Stx3	-	208639533	intron	AACAAA	-0.196902	0.755524	1	N	Not Sig	ncbiRefSeq	syntaxin 3 [Source:RGD Symbol;Acc:621005]	TACTTAACCACCATCCCTCAAAACAAAACCTTTTGAAGTGTATGGAATGGTAATAGGGGT
chr1	Stx3	-	208641187	intron	AACAAA	2.72393	0.0146631	0.59516	N	Not Sig	ncbiRefSeq	syntaxin 3 [Source:RGD Symbol;Acc:621005]	GTCACCACATGGTGGCACCAAATCACCAAAACAATTTTGCAGAGAGATGGCCCCAGAGCA
chr1	Stx4	+	182458193	intron	AATAAA	0.110134	1	1	N	Not Sig	ncbiRefSeq	syntaxin 4 [Source:RGD Symbol;Acc:621019]	GCAGAGATGGGTTCTATATTTTCATTCCAAATAAAATGCTCTTTCTTTAAAAAAAAAAAA
chr1	Stx4	+	182458890	3UTR	TATAAA	0.0821176	0.928179	1	N	Not Sig	ncbiRefSeq	syntaxin 4 [Source:RGD Symbol;Acc:621019]	CTGTTTGTCTGGGACATATGGTTTTATAAAAAATTAAAAAAACAAAAAAACAAAAGACCA
chr1	Stx5	+	205653562	3UTR	ATTACA	-0.0113338	0.924149	1	N	Not Sig	ncbiRefSeq	syntaxin 5 [Source:RGD Symbol;Acc:68426]	CTCAATCTGCCAAACATGCTGCAGCCTGTTTCCTCCCAATTACAGCAAGACTGTCAGCCT
chr1	Stx7	-	21197074	unassigned	none	0.0709698	0.953848	1	N	Not Sig	ncbiRefSeq	syntaxin 7 [Source:RGD Symbol;Acc:619747]	CCATCAGCAGCTAATGTCGGAAAATGCCGGGTTCCACACATAGAGTCCTCAAGAATCAGA
chr1	Stx7	-	21197253	3UTR	TATAAA	-0.329802	0.369084	1	N	Not Sig	ncbiRefSeq	syntaxin 7 [Source:RGD Symbol;Acc:619747]	AGAACATTATAAAACACAAGCGATAATCTAAGATAGCCCCTTTTACAGCATTCATATTAG
chr1	Stx7	-	21197862	3UTR	AATGAA	0.0524019	0.916062	1	N	Not Sig	ncbiRefSeq	syntaxin 7 [Source:RGD Symbol;Acc:619747]	TGTCCCACAGATGGGGCTGCTAGGGTTTGCCTACTGAGAACATTTACTGGACAAATGAAA
chr1	Stx7	-	21197966	3UTR	AATAGA	0.571182	0.933817	1	N	Not Sig	ncbiRefSeq	syntaxin 7 [Source:RGD Symbol;Acc:619747]	CACGGGTTACACAGTGACAGAGGTGTAGGCAGAGCACACATGCCAATCAGATAATTCCCC
chr1	Stxbp5	-	4182488	unassigned	AATAAA	-0.36583	0.380177	1	N	Not Sig	ncbiRefSeq	syntaxin binding protein 5 [Source:RGD Symbol;Acc:708517]	CAAAGTGCAGATTTAAATAAAGGACAATAAGAAGCCATGACCTAAAGAAGTGCGGAAAAT
chr1	Stxbp5	-	4210039	intron	ATTAAA	0.479122	0.694116	1	N	Not Sig	ncbiRefSeq	syntaxin binding protein 5 [Source:RGD Symbol;Acc:708517]	ATAAAATTATTCACTTTTTGTTCATCGTCTGAATTGTGTGGCGAGGAAGAACCTACACAA
chr1	Sufu	+	245355573	3UTR	ATTAAA	0.466926	0.42216	1	N	Not Sig	ncbiRefSeq	SUFU negative regulator of hedgehog signaling [Source:RGD Symbol;Acc:1559462]	ATTTTGTTCCCACTTGTCCCTCTTCCTCTGTGTAATCTAAGTGCATTAAACATATCTGCA
chr1	Sult1a1	-	181272022	exon	none	-0.0321408	0.823722	1	N	Not Sig	ncbiRefSeq	sulfotransferase family 1A member 1 [Source:RGD Symbol;Acc:3767]	CCTCTTGCCCTCCTCCATCAGACACGTGAGATTGATGGCCGCAAGAGGGAGAAGGTCCAG
chr1	Sult1a1	-	181272214	3UTR	none	-0.194569	0.778769	1	N	Not Sig	ncbiRefSeq	sulfotransferase family 1A member 1 [Source:RGD Symbol;Acc:3767]	GCCTCAGCCACATCCCCAATCCTATTCTCTTAGCTCAGATTTCCTCTAGGCATACAACAA
chr1	Sult2b1	-	96200154	3UTR	none	0.155609	1	1	N	Not Sig	ncbiRefSeq	sulfotransferase family 2B member 1 [Source:RGD Symbol;Acc:1308882]	CTGGCTGCTCTGCCTGCTGGATCCCCGGCCTGCCCCTGAAAGTGCAGCCCAGAGGAAGGG
chr1	Supt5h	-	83586712	unassigned	AATAAT	-0.0398037	0.984795	1	N	Not Sig	ncbiRefSeq	SPT5 homolog, DSIF elongation factor subunit [Source:RGD Symbol;Acc:1563807]	ATCTGGTTATTTGCCCCAACTTAATAACGATACTTCAGACTAGGAAAACTCTCCAAACAC
chr1	Sv2b	-	128978470	unassigned	ATTACA	-0.165855	0.547069	1	N	Not Sig	ncbiRefSeq	synaptic vesicle glycoprotein 2b [Source:RGD Symbol;Acc:619716]	CCAAAGAGTGGATTATTACATGATCTCAAGCTCACATGGTACAAATTTCAGAAGCAGGAC
chr1	Svip	-	101587127	unassigned	none	0.128175	0.94201	1	N	Not Sig	ncbiRefSeq	small VCP interacting protein [Source:RGD Symbol;Acc:1565432]	TTACCTCCTGATACCTCCACACTTTGACAGGCTTGTACTTTCCAAGTACAGGCCTTACAT
chr1	Svip	-	101587803	3UTR	AATAAA	0.142788	0.764677	1	N	Not Sig	ncbiRefSeq	small VCP interacting protein [Source:RGD Symbol;Acc:1565432]	AAGTTGAATAGAATGAAAAGTGGGCTATTTAGTAAGTTTGGAAATAAAAATATTACCAAT
chr1	Swap70	+	164328796	3UTR	ATTAAA	0.145446	0.892483	1	N	Not Sig	ncbiRefSeq	switching B-cell complex subunit SWAP70 [Source:RGD Symbol;Acc:1305579]	ATGTGCTCCACTTTTTATTTTTTGCTAATTTTTCTAAGATATTAAAATGTTTTCTATGGG
chr1	Sympk	+	78700683	3UTR	AATAAA	0.444544	0.609909	1	N	Not Sig	ncbiRefSeq	symplekin scaffold protein [Source:RGD Symbol;Acc:1306735]	GGGGCGGGATGGGGCCTCCTAGAGCTTTGCCTTAACACAAATAAAGGAGGTGGCGCTCAG
chr1	Syne1	-	41512145	unassigned	AACAAA	-0.223675	0.835067	1	N	Not Sig	ncbiRefSeq	spectrin repeat containing nuclear envelope protein 1 [Source:RGD Symbol;Acc:620546]	TTTCTCTCCCTCTTCCTCTCCTCCCCCTCTCCCTCCTATAACAAAGCATCCATATATGTG
chr1	Syne1	-	41512275	3UTR	AAGAAA	-0.262482	0.646287	1	N	Not Sig	ncbiRefSeq	spectrin repeat containing nuclear envelope protein 1 [Source:RGD Symbol;Acc:620546]	TCTTAATGAATGATGAAAATTCAAGTTATGTTTTAAAGGAAGAAAAGACACGGACGAAGG
chr1	Syne1	-	41513037	CDS	none	-0.312025	0.702526	1	N	Not Sig	ncbiRefSeq	spectrin repeat containing nuclear envelope protein 1 [Source:RGD Symbol;Acc:620546]	TGCTTCAGAGGGGAGGAGGACCGTTGGTATATCTGAGCATGGGATGGAACGATCTGGCAA
chr1	Syne1	-	41800974	intron	TATAAA	0.0341101	0.764073	1	N	Not Sig	ncbiRefSeq	spectrin repeat containing nuclear envelope protein 1 [Source:RGD Symbol;Acc:620546]	TATAAACAGTGCACTGCATGGGCATCAAACCAAAATCAAGGAAAAGAATACTGAATGCAA
chr1	Syngr4	-	96358678	unassigned	none	1.02578	0.332607	1	N	Not Sig	ncbiRefSeq	synaptogyrin 4 [Source:RGD Symbol;Acc:1307737]	TCATGAGCAGCTAGTAAGTACTCCTAAGGGCTGGGCCACCTATCCAGCCAGACTCCAAAC
chr1	Synj2	+	46614943	CDS	none	-0.0472139	0.947498	1	N	Not Sig	ncbiRefSeq	synaptojanin 2 [Source:RGD Symbol;Acc:69436]	CCTCCTCCAATAACAGCTCCCATCCCGCCTGTTCCCAAACCAAGAACATTTCAGCCTGGG
chr1	Synj2	+	46617494	3UTR	AATAAA	-0.358668	0.247341	1	N	Not Sig	ncbiRefSeq	synaptojanin 2 [Source:RGD Symbol;Acc:69436]	TGGACAGACAACAACTTACCAATAAACAAAATAAAGGAAAATTAAAGGTGACATGCAGAT
chr1	Synj2	+	46621356	3UTR	ATTAAA	0.135569	0.787385	1	N	Not Sig	ncbiRefSeq	synaptojanin 2 [Source:RGD Symbol;Acc:69436]	ATAGCGAATTAAAATACCCTAGAAAGAATATTTAAAACAACTATTCTCAGCAATATGAAA
chr1	Synj2	+	46621916	CDS	none	0.153588	1	1	N	Not Sig	ncbiRefSeq	synaptojanin 2 [Source:RGD Symbol;Acc:69436]	TTCAAGGTCTCTGGCTAAAGTTTCACAGATGAACTGTAGAGTACGTTGGTACAAAAACGC
chr1	Synm	-	121333711	unassigned	AATAAA	0.168484	0.630858	1	N	Not Sig	ncbiRefSeq	synemin [Source:RGD Symbol;Acc:727872]	ATCTGAAGAAAGCGACAGTGTAGTCACACATATAAAATAAATAAATAAAAAACCAATACA
chr1	Syt12	-	201729306	unassigned	AGTAAA	-0.106032	0.949789	1	N	Not Sig	ncbiRefSeq	synaptotagmin 12 [Source:RGD Symbol;Acc:621876]	TACCCGTCTGGGGCCCAAGGTTTAGGGATGTTCCAGTGAAGATAGTAAAATGACTCGAGG
chr1	Syt17	-	172695274	unassigned	AATAGA	0.028751	0.946298	1	N	Not Sig	ncbiRefSeq	synaptotagmin 17 [Source:RGD Symbol;Acc:708576]	TATGCATACCAGCAGCCAAACACCTTCCCATCTTCTGTCATGAAAAAACAGATAACTCCA
chr1	Syt5	+	69285071	3UTR	AATAAA	0.0430458	0.700918	1	N	Not Sig	ncbiRefSeq	synaptotagmin 5 [Source:RGD Symbol;Acc:3806]	TTCCCACACAGCTTGACCCCTGTGCTGCTCCTGGGGCCAAATAAATACTCAACAGCTTGG
chr1	Syt7	+	207092151	3UTR	AATAAA	0.534111	0.471353	1	N	Not Sig	ncbiRefSeq	synaptotagmin 7 [Source:RGD Symbol;Acc:62013]	GGAATGGGCCCTGCTTTTTGTGGCAAGGCCTGTTCTGATTAATAAAGGATCGTGAAAAAG
chr1	Syt7	+	207093786	3UTR	AATAAA	-0.120639	0.83632	1	N	Not Sig	ncbiRefSeq	synaptotagmin 7 [Source:RGD Symbol;Acc:62013]	CCTGTCTGAATAGACGTTCTGTGTGGCACGCCTGGCTGTGTTAATAAATGTCCATCTTCA
chr1	Sytl2	+	144379310	3UTR	TATAAA	-0.169033	0.585582	1	N	Not Sig	ncbiRefSeq	synaptotagmin-like 2 [Source:RGD Symbol;Acc:1307647]	CTTAGATTTAAAAACAATACGTTGTATTAGGAATCCTAAAATATAAATTCTCTGGTATGG
chr1	Syvn1	+	203346135	3UTR	AATAAA	0.0491823	0.842278	1	N	Not Sig	ncbiRefSeq	synoviolin 1 [Source:RGD Symbol;Acc:1310488]	ATATTGTATAAATTTTAATAGCTTAAATTGTATATACAGCTAAATAAAACCTTGCATTAA
chr1	Tab2	-	2375025	unassigned	none	-0.109877	0.759315	1	N	Not Sig	ncbiRefSeq	TGF-beta activated kinase 1/MAP3K7 binding protein 2 [Source:RGD Symbol;Acc:1309527]	GGGGCAGCATGCCAAGTACAAACTGTCCCACAAACCTCAAAGACAAGCCACAAAATCCAC
chr1	Tab2	-	2380136	intron	AATGAA	0.136451	1	1	N	Not Sig	ncbiRefSeq	TGF-beta activated kinase 1/MAP3K7 binding protein 2 [Source:RGD Symbol;Acc:1309527]	GTTTTCTAAGATTTGCTTCCCAAAATGTAAGTAACAGTTCCCACTTAACGGATGCACTGA
chr1	Tacc2	+	185327880	3UTR	AATAAA	0.139829	0.745685	1	N	Not Sig	ncbiRefSeq	transforming, acidic coiled-coil containing protein 2 [Source:RGD Symbol;Acc:1303004]	AGAATGCATGTTTCAAATAAAATTCTCTATTGTAAATAAATTTTTTTCTTTGAGTCTTGG
chr1	Taf10	-	160095107	3UTR	none	-0.0968832	0.928211	1	N	Not Sig	ncbiRefSeq	TATA-box binding protein associated factor 10 [Source:RGD Symbol;Acc:1305907]	CTGGGCTCAGAGCTTTGTCACTTGCCACTTGATGTCTCCCAACATGGGAGGGATCAGCCC
chr1	Taf5	+	245973914	3UTR	AATAAA	0.185941	0.655754	1	N	Not Sig	ncbiRefSeq	TATA-box binding protein associated factor 5 [Source:RGD Symbol;Acc:1311332]	TGTTGCATTTTGTACAGTTTTATATTTTTGATATCTTGTAAATAAAGACAACCAGCTTTT
chr1	Tagap	-	47170724	unassigned	AATATA	1.43576	0.0891236	1	N	Not Sig	ncbiRefSeq	T-cell activation RhoGTPase activating protein [Source:RGD Symbol;Acc:1308618]	AGTGTGTGGATAATGTTCTGGATGGACTTTTATTTGAGGCAAAGAATATAGCGTCAGCAA
chr1	Taldo1	+	196503964	3UTR	ATTAAA	0.161599	0.67873	1	N	Not Sig	ncbiRefSeq	transaldolase 1 [Source:RGD Symbol;Acc:620674]	ATTATAGGATTCTGATTTCATGTGAAATTTTGTCTAATTCATTAAAGCAGTCGCTTTTCC
chr1	Taok2	-	181475707	unassigned	GATAAA	0.0315101	0.820436	1	N	Not Sig	ncbiRefSeq	TAO kinase 2 [Source:RGD Symbol;Acc:621590]	ATCATTTGCCACTGATAAATTCTTCACACACACCTTAGACAGAAAGGGAGAAGTCCTGTG
chr1	Taok2	-	181479537	intron	none	-0.234965	0.76381	1	N	Not Sig	ncbiRefSeq	TAO kinase 2 [Source:RGD Symbol;Acc:621590]	AGGGCAAACCAGGGAGGCTAGGCGGCAGGACAAAGCAGACAGAGGCAGCCTGGGCCAAAG
chr1	Tars3	+	119265189	intron	AATAAA	-0.348745	0.740898	1	N	Not Sig	ncbiRefSeq	threonyl-tRNA synthetase 3 [Source:RGD Symbol;Acc:1311308]	CCTCACCCAACAACGACAGAAACGACTTTCAATAAAAGCCCATGGTCCTTTCTGAACATG
chr1	Tars3	+	119265491	intron	AATAAA	-0.15918	0.986217	1	N	Not Sig	ncbiRefSeq	threonyl-tRNA synthetase 3 [Source:RGD Symbol;Acc:1311308]	TTCCTTATTTATCTTTAAACACTAAATTCTTAAATAAAATGCATCACTTGCTGTTTCTAG
chr1	Tbc1d10b	-	181814971	5UTR	none	-0.263888	0.77167	1	N	Not Sig	ncbiRefSeq	TBC1 domain family, member 10b [Source:RGD Symbol;Acc:1309191]	AGTGACAGTGGAGGCAGCAGATCCCAGGCAAAGCTGAGGAGGAGCTGGACCACTGATTGT
chr1	Tbc1d10b	-	181815420	3UTR	AACAAG	-0.426118	0.485281	1	N	Not Sig	ncbiRefSeq	TBC1 domain family, member 10b [Source:RGD Symbol;Acc:1309191]	TCTTCCTGGCTCCTTCCCCCTTACTCTATAGCACTCTTCAAATAACAAGGCAGGAGACAG
chr1	Tbc1d17	-	95324769	unassigned	none	0.000605547	0.995342	1	N	Not Sig	ncbiRefSeq	TBC1 domain family, member 17 [Source:RGD Symbol;Acc:1309686]	CAACCAGCAGCCTCAAGGCCAGCCTAAGCTATGGGCAAGATCAAAAAGCAAAGCGTCCTG
chr1	Tbcb	-	85477638	unassigned	ATTATA	0.0834259	0.837103	1	N	Not Sig	ncbiRefSeq	tubulin folding cofactor B [Source:RGD Symbol;Acc:1309965]	ACACACCATCACGAGTATTTTATTATACTCTTCCTGGAATCAAGAGACTTCCACAACCTT
chr1	Tbp	+	56480429	3UTR	AAGAAA	-0.179884	0.712221	1	N	Not Sig	ncbiRefSeq	TATA box binding protein [Source:RGD Symbol;Acc:67398]	TTGTAAGTCATGTGATCATACTGTCAAAGAAATTTATTTTAGATATAATGCCTGAGACCA
chr1	Tbpl1	+	22803305	3UTR	AATAAA	0.440122	0.216067	1	N	Not Sig	ncbiRefSeq	TATA-box binding protein like 1 [Source:RGD Symbol;Acc:1597456]	AAAGAACCTGTAAACGTTATCTTTTTAAATTGAATGTGCACAAATAAAAGTTTGGAAAAG
chr1	Tcf7l2	+	254978967	3UTR	AATAAA	0.175325	0.612053	1	N	Not Sig	ncbiRefSeq	transcription factor 7 like 2 [Source:RGD Symbol;Acc:1583621]	CTGTACAGTATCTGTAGCATGCCGTTCTGGATTAATAAAAGCAACTTAGTATGTGCAGAA
chr1	Tcirg1	-	201127033	unassigned	AGTAAA	0.0231808	1	1	N	Not Sig	ncbiRefSeq	T-cell immune regulator 1, ATPase H+ transporting V0 subunit A3 [Source:RGD Symbol;Acc:735136]	AGAGCTGTGACCAGTAAAGTGTCAGTCTAACCCTGGTACCCCAGAGAGGACAAAGGCAGA
chr1	Tcirg1	-	201128046	intron	none	0.0447145	1	1	N	Not Sig	ncbiRefSeq	T-cell immune regulator 1, ATPase H+ transporting V0 subunit A3 [Source:RGD Symbol;Acc:735136]	ACAGGGAAGCAAAGGTCACTTCCCATTCAGCCTTCCTTCCCTGTACTCCTTCCTCCTCCT
chr1	Tcp1	-	47829060	unassigned	ACTAAA	-0.0607327	0.731808	1	N	Not Sig	ncbiRefSeq	t-complex 1 [Source:RGD Symbol;Acc:3832]	TTCAAACACTAAACAGAAAGAACGTGAGACCAGAGGACCACAGTGAGGACAGGAACCCAG
chr1	Tctn3	-	239414003	unassigned	ATTAAA	-0.16472	0.813396	1	N	Not Sig	ncbiRefSeq	tectonic family member 3 [Source:RGD Symbol;Acc:1305166]	TTTCTTCTGCTCCTGAAGCTGGATTGTGTCTGTTTCATTAAAAGACAATTTGGGAGCAGG
chr1	Tctn3	-	239415177	3UTR	none	-0.19596	0.878731	1	N	Not Sig	ncbiRefSeq	tectonic family member 3 [Source:RGD Symbol;Acc:1305166]	TACAGAGCCAGCAGTTTCCTGGCTCAAATTGTCAGCACTAATGCACTCTGAGTTCACTCT
chr1	Tent4a	+	33799405	3UTR	AATAAA	-0.292445	0.711171	1	N	Not Sig	ncbiRefSeq	terminal nucleotidyltransferase 4A [Source:RGD Symbol;Acc:1307356]	ATTGACATATTTTTATGTAAAGTTTTTCTATTCTTTGATTTTTAATAAACTTTAGAAACC
chr1	Tert	-	29637212	unassigned	AAGAAA	-1.24299	0.258985	1	N	Not Sig	ncbiRefSeq	telomerase reverse transcriptase [Source:RGD Symbol;Acc:70494]	ATTAAGAAAAAAAAAAGAAGTCTTTTTGAGTGGTAGTTAGAATTAGTATGACAGACAACA
chr1	Tfb1m	-	44115239	intron	AATGAA	-0.234784	0.575931	1	N	Not Sig	ncbiRefSeq	transcription factor B1, mitochondrial [Source:RGD Symbol;Acc:727795]	CAATTTTTAGCCCCCGAAAGTAATAGTACACACGATTCCATACACACAGAGGGCTACAAT
chr1	Tfb1m	-	44115590	3UTR	none	0.833358	0.393219	1	N	Not Sig	ncbiRefSeq	transcription factor B1, mitochondrial [Source:RGD Symbol;Acc:727795]	TACCTCTGCTCACTGTACAACACACAACTGTAACCTCTTCCTGGTGGTCTCTCACTGCAG
chr1	Tfb1m	-	44118428	3UTR	none	-0.0887952	0.552802	1	N	Not Sig	ncbiRefSeq	transcription factor B1, mitochondrial [Source:RGD Symbol;Acc:727795]	CTCTACATTGTAGACTCTGTTTCTGTGTCATATGGAGAAATGTGCTTTTTTTCTTGGTAG
chr1	Tfb1m	-	44119163	3UTR	AATATA	1.61046	0.0985582	1	N	Not Sig	ncbiRefSeq	transcription factor B1, mitochondrial [Source:RGD Symbol;Acc:727795]	ACTGCAGGAAAACTGTTCATGTTTGGGTTTTATGCAGTATATAATTTTCCACAAAACCTG
chr1	Tfb1m	-	44121549	exon	CATAAA	0.0276487	0.969374	1	N	Not Sig	ncbiRefSeq	transcription factor B1, mitochondrial [Source:RGD Symbol;Acc:727795]	ATGCTGCTAACCACAGGACCTAAACTAAGAGCCATAAAGTCAAAAAGGATTCTTACCCAA
chr1	Tfb1m	-	44136253	intron	none	-1.47828	0.659035	1	N	Not Sig	ncbiRefSeq	transcription factor B1, mitochondrial [Source:RGD Symbol;Acc:727795]	GCTACTGGGCTGTTACTCTAGCTATTCTGTTTGCCTTAGATCCACCCCCCCCCCCCAACC
chr1	Tfpt	+	65597407	3UTR	AATAAA	-0.0822618	1	1	N	Not Sig	ncbiRefSeq	TCF3 fusion partner [Source:RGD Symbol;Acc:620839]	CCCTAGCTAGCCCACCCTTTGACTAACCCTGTCTCCCCAATAAACAGATTCCCCATGTAC
chr1	Tgfb1i1	+	182835226	3UTR	CATAAA	-0.0749539	0.900928	1	N	Not Sig	ncbiRefSeq	transforming growth factor beta 1 induced transcript 1 [Source:RGD Symbol;Acc:620173]	CCCATGGCTCACTGTTCTGTACTTTTTTTTTCTACAAACATAAAAACACGCTCCACATCT
chr1	Tgfb1i1	+	182835463	3UTR	AATACA	0.303016	0.955199	1	N	Not Sig	ncbiRefSeq	transforming growth factor beta 1 induced transcript 1 [Source:RGD Symbol;Acc:620173]	GATCCTAAGCTGCATAGCAAAACTGAGGCCAGGTTGGGTACATAAGACTATCTCAAAACA
chr1	Thap12	+	153019385	3UTR	AATAAA	-0.408979	0.659603	1	N	Not Sig	ncbiRefSeq	THAP domain containing 12 [Source:RGD Symbol;Acc:1309679]	AAAATTAATTTTGTATAGTTTATTTCAATCTAAATAAAATGTGAATTTTGTTTAAATTTC
chr1	Thrsp	-	151723414	unassigned	none	0.103025	0.924422	1	N	Not Sig	ncbiRefSeq	thyroid hormone responsive [Source:RGD Symbol;Acc:3859]	CGTGAACATCTGCAGGAAAAGCTGTTTGGGCAAAAGGGTAGACTGTGTGACACACCGTAG
chr1	Thrsp	-	151723552	3UTR	AATAAG	0.0833506	0.842245	1	N	Not Sig	ncbiRefSeq	thyroid hormone responsive [Source:RGD Symbol;Acc:3859]	GACGAAGATGAATGGGACTGGGGGTCATGATGTGAAATTCATGAAGAATCAATAAGAAGA
chr1	Thrsp	-	151723661	3UTR	none	1.01079	0.260036	1	N	Not Sig	ncbiRefSeq	thyroid hormone responsive [Source:RGD Symbol;Acc:3859]	TAGTTGCATAGTTCACTTGTGCTCAGCCTCATCAGATCCAACAGGATGAGAAGCTCATCC
chr1	Thumpd1	-	174078874	unassigned	AATAAG	0.225431	0.500806	1	N	Not Sig	ncbiRefSeq		ACACACTATACACATCAGAAGACATTTAATATGGGGCATAGAAAAAATAAGAATGCCAAA
chr1	Tial1	-	183008357	unassigned	AATGAA	0.0417913	0.963995	1	N	Not Sig	ncbiRefSeq	Tia1 cytotoxic granule-associated RNA binding protein-like 1 [Source:RGD Symbol;Acc:1595845]	AACTGCCTCTTCCATGCTGACGGGAACAGTTACACAATGAACAACAATGAGAAAAAGCCA
chr1	Tial1	-	183010817	exon	ATTATA	-0.239282	0.722238	1	N	Not Sig	ncbiRefSeq	Tia1 cytotoxic granule-associated RNA binding protein-like 1 [Source:RGD Symbol;Acc:1595845]	AGTGTCTAAGGATCAAAGTGTATTACCCATTTCTCCTATTATATCAAAATTTATAGTCAG
chr1	Tial1	-	183012385	intron	AACAAA	-0.0553213	0.907426	1	N	Not Sig	ncbiRefSeq	Tia1 cytotoxic granule-associated RNA binding protein-like 1 [Source:RGD Symbol;Acc:1595845]	ACAGCTTTCTCTTTTGCCAGAAACTCATCTGTTTCTACAATGGAAAAACCAAAACAACTC
chr1	Tiam2	+	44119497	3UTR	AATAAA	-0.15502	0.582161	1	N	Not Sig	ncbiRefSeq	TIAM Rac1 associated GEF 2 [Source:RGD Symbol;Acc:2324148]	TTAGGGGCACAATGTGCAGACATTTCATTTTGGAAGGTTGTAATAAATGCTGTTTATACT
chr1	Tigd3	-	203178455	unassigned	AGTAAA	-0.413699	0.742967	1	N	Not Sig	ncbiRefSeq	tigger transposable element derived 3 [Source:RGD Symbol;Acc:1305393]	AGCCCAGGCTACACAAGACCACATTCCCAAAAGAAAGAAAGTAAAAAGAAAATACACACC
chr1	Timm10b	+	159981186	3UTR	none	-0.0219665	0.933355	1	N	Not Sig	ncbiRefSeq	translocase of inner mitochondrial membrane 10B [Source:RGD Symbol;Acc:71097]	AGAACAGCCCAGAGACTCGCCATCAGGCAGCTAGCTAGCTGTCCCTGACCGCAGGAGAGA
chr1	Timm10b	+	159983370	3UTR	AATAAA	0.151882	0.771733	1	N	Not Sig	ncbiRefSeq	translocase of inner mitochondrial membrane 10B [Source:RGD Symbol;Acc:71097]	GACTGCTGAGAGAGCTCTACATCAGCATCTGTATGTATCCCTTCAATAAACATGTGCTGT
chr1	Timm50	-	83574871	unassigned	none	-0.0794141	0.995187	1	N	Not Sig	ncbiRefSeq	translocase of inner mitochondrial membrane 50 [Source:RGD Symbol;Acc:1587684]	TATGAGGTATGGATGACCAACAGCTCCAGAACCACATTCCCAAGGAGCCACACACACCAG
chr1	Tjp1	-	118849837	unassigned	AGTAAA	-0.00574269	0.886872	1	N	Not Sig	ncbiRefSeq	tight junction protein 1 [Source:RGD Symbol;Acc:1306305]	TTAAAACAGGATCATAAGGTTGCTTGGAATGGGAAACAGAGAGCAAGTAAAGCAAACTAA
chr1	Tjp2	-	221709744	unassigned	TATAAA	0.448801	0.498933	1	N	Not Sig	ncbiRefSeq	tight junction protein 2 [Source:RGD Symbol;Acc:619807]	TGCAGACACTGGGCCCACATGTGACACACATAGATGCATGCAGGAAAAATATTCATACAC
chr1	Tkfc	-	207238229	unassigned	AATGAA	-0.421957	0.42458	1	N	Not Sig	ncbiRefSeq	triokinase and FMN cyclase [Source:RGD Symbol;Acc:1311026]	ATGATGTTTAAATCTGTTTGGGTGTCCTTCATAATGAATGGCTATAGGACACATCTTTTT
chr1	Tkfc	-	207239525	3UTR	GATAAA	0.637258	0.613897	1	N	Not Sig	ncbiRefSeq	triokinase and FMN cyclase [Source:RGD Symbol;Acc:1311026]	CACAGGTGATGAACTGCCTGCCAAGAGATGGTCATGGTCACTGTAACCAGGGATAAAGTC
chr1	Tlcd3b	+	181439743	intron	AATAAA	0.12813	0.664633	1	N	Not Sig	ncbiRefSeq	TLC domain containing 3B [Source:RGD Symbol;Acc:1308215]	GGCCACAGACCCCGGGAGGTGCTTTTACAGACCGCTAATAAAGACGATCTTCCTGAACGC
chr1	Tle4	-	211661737	unassigned	AATAAA	-0.0434017	0.973491	1	N	Not Sig	ncbiRefSeq	TLE family member 4, transcriptional corepressor [Source:RGD Symbol;Acc:3868]	GATTTTAATATAGAGAATGGCATAGACAAAGAAATTAGTAAAAATAATTAGAAAATAAAT
chr1	Tlnrd1	-	137864339	unassigned	AATACA	0.308935	0.525964	1	N	Not Sig	ncbiRefSeq	talin rod domain containing 1 [Source:RGD Symbol;Acc:1311666]	TCACAGATGACAGGCGGCAGGTATGCACAGTTAGCAAAAATACAGTAACTGCAAAAAGCC
chr1	Tm2d3	+	119277098	3UTR	AATAAA	0.050579	0.909817	1	N	Not Sig	ncbiRefSeq	TM2 domain containing 3 [Source:RGD Symbol;Acc:1564929]	CAGCATCTGTACTTGGCTTGCCTTGATGAAGGTAAAATAAAGAAATGGAACACTGAACCA
chr1	Tm6sf1	+	135828443	3UTR	ATTACA	-0.0435512	0.912479	1	N	Not Sig	ncbiRefSeq	transmembrane 6 superfamily member 1 [Source:RGD Symbol;Acc:1307978]	TCGCTATAACACAAGAATTACATCAATACTTCACATTACACATATGGAGCCAAATGACAC
chr1	Tm7sf2	-	203355929	unassigned	AAGAAA	0.229812	0.766717	1	N	Not Sig	ncbiRefSeq	transmembrane 7 superfamily member 2 [Source:RGD Symbol;Acc:1311205]	ATTAGTCAGCTAGTCATCCCCAAGCCTCAAGTCACTGACCCCAGGATAGAAGAAAAACAG
chr1	Tm9sf3	-	240032059	unassigned	AAGAAA	-0.462877	0.240816	1	N	Not Sig	ncbiRefSeq	transmembrane 9 superfamily member 3 [Source:RGD Symbol;Acc:1564625]	TACCCCTCATGCCTCAGTTTACCTATTTCACAAAGGAAAGAAAGCAAGCATCCAAGGGAA
chr1	Tm9sf3	-	240034990	3UTR	TATAAA	0.361888	0.253975	1	N	Not Sig	ncbiRefSeq	transmembrane 9 superfamily member 3 [Source:RGD Symbol;Acc:1564625]	TATGATGTGGCCTTCTGAGCAGGTTCTTCAAATTATAAACACATCTACTGTCACAAAACA
chr1	Tmc5	+	172999478	3UTR	AATAAA	-0.0464038	1	1	N	Not Sig	ncbiRefSeq	transmembrane channel-like 5 [Source:RGD Symbol;Acc:1307037]	GGTTTAGAAACTGGTGCTAATGATAATGGTTCATAATGAATAAAATACATGATCGCCAAT
chr1	Tmem109	-	207519627	unassigned	AAGAAA	-0.308928	0.292595	1	N	Not Sig	ncbiRefSeq	transmembrane protein 109 [Source:RGD Symbol;Acc:1359538]	TTCCTGCTGGAAGTCCAGAAAGTTGGGCTGCCCCCACAGAAGAAAGTTTGGCAGCAGAGA
chr1	Tmem126a	-	144422697	exon	AGTAAA	0.0156283	0.986324	1	N	Not Sig	ncbiRefSeq	transmembrane protein 126A [Source:RGD Symbol;Acc:1305677]	TATTCTGGATGAGAAAGGCTAATTTCCTACTATAAGTAAAAAAGCACTCAGAAACCAGTC
chr1	Tmem126a	-	144424370	3UTR	none	0.881784	0.160078	1	N	Not Sig	ncbiRefSeq	transmembrane protein 126A [Source:RGD Symbol;Acc:1305677]	ACCTCATGTATGTTTTAATAGTCAGTCTGCCACTAATTTACATTCCCAGTCTCACAACTA
chr1	Tmem126b	-	144437141	unassigned	AATAGA	-0.406803	0.314591	1	N	Not Sig	ncbiRefSeq	transmembrane protein 126B [Source:RGD Symbol;Acc:1308371]	ACCCCAAAGTGGCCCTACCTCAGGGCACAACCCACAGATCACAAATAGACAAGGAGACCA
chr1	Tmem126b	-	144439549	exon	AAGAAA	-0.0571141	0.864767	1	N	Not Sig	ncbiRefSeq	transmembrane protein 126B [Source:RGD Symbol;Acc:1308371]	GTCAGATCTGAGGCTCCAAACCCATTCCTATATAACATGAGGAAAGAAAGAAGAAACTTG
chr1	Tmem132a	-	207507073	3UTR	none	-0.0405601	0.789878	1	N	Not Sig	ncbiRefSeq	transmembrane protein 132A [Source:RGD Symbol;Acc:727936]	AGTCAGGGGCTGAAATGGTCTCCACCCACCCTGATAGAGAGTGTCACAGCAGTACCAGCC
chr1	Tmem134	+	201424778	3UTR	AATAAA	0.0583588	0.943691	1	N	Not Sig	ncbiRefSeq	transmembrane protein 134 [Source:RGD Symbol;Acc:1305824]	GGCCCTGGACTCCTGGGTTGGTTTAATTTTGTGCTAATAAAAGGGTAATTACTTCCAGCA
chr1	Tmem135	-	143006342	unassigned	AACAAA	0.241725	0.618956	1	N	Not Sig	ncbiRefSeq	transmembrane protein 135 [Source:RGD Symbol;Acc:1309948]	CTGTATTCTACTTCAGGGCAGTTGTTTCTCATTACATTTTACAGAAAACAAAGACACGAT
chr1	Tmem135	-	143006561	3UTR	CATAAA	0.0678889	1	1	N	Not Sig	ncbiRefSeq	transmembrane protein 135 [Source:RGD Symbol;Acc:1309948]	AACCTGACAAGAAAAATGCAGCAGACATAAAATCTGAGAGGAGAAAATGAGGTACATGTA
chr1	Tmem138	-	207219112	intron	none	-0.243016	0.542148	1	N	Not Sig	ncbiRefSeq		GTGCTGAGGCTCTGACTTGGTATTCCCCTTCACCATGAAGACACCAAGACAGACAGACAG
chr1	Tmem143	+	96387989	3UTR	AATAAA	-0.164918	0.77574	1	N	Not Sig	ncbiRefSeq	transmembrane protein 143 [Source:RGD Symbol;Acc:1305013]	TCTGTACACTGTGTGTCACTTCACCCTCTTCCAAAGGAATAAATCATGCTTAATAAATCT
chr1	Tmem145	+	80901614	3UTR	AATAAA	-0.014683	0.991309	1	N	Not Sig	ncbiRefSeq	transmembrane protein 145 [Source:RGD Symbol;Acc:1595911]	CTGGCAGAAAGACGTTTTCTCTTCTTGCCAAAATAAAGAGGATTCGTTGAGTTTTTAATC
chr1	Tmem147	-	85977027	unassigned	ACTAAA	0.104529	0.816284	1	N	Not Sig	ncbiRefSeq	transmembrane protein 147 [Source:RGD Symbol;Acc:1304706]	GCTCTGTGGAACCTAAGTCCGAGGATTGGGTTTCTGAGAGAGAAATGGACGTACTAAAAA
chr1	Tmem150b	+	69134615	3UTR	none	0.100469	0.568776	1	N	Not Sig	ncbiRefSeq	transmembrane protein 150B [Source:RGD Symbol;Acc:1306181]	CCAAGTTTTGTGTCCCCCCCTCCCAACATACTCCTTGGGCCTTATATACAGATTCACAGT
chr1	Tmem151a	-	202387396	unassigned	none	0.0928625	0.537371	1	N	Not Sig	ncbiRefSeq	transmembrane protein 151A [Source:RGD Symbol;Acc:1310680]	CACTCAGTGGGCTTGCAACGGTGGCCTTGGATCCACTACCCAGGAACACATGTGCGAAAC
chr1	Tmem159	+	174503035	3UTR	ATTAAA	-0.232121	0.575124	1	N	Not Sig	ncbiRefSeq		TGTGCGATGATTCCCACTCCATTTACTGTGGTATTTTATTAAATATTTATTTGCTTCTTG
chr1	Tmem160	+	77167156	3UTR	ATTAAA	-0.0035887	0.841938	1	N	Not Sig	ncbiRefSeq	transmembrane protein 160 [Source:RGD Symbol;Acc:1564549]	TGTGGGGACTGGCTGGGCCTGATGACTGGGACATTAAAACCTGACCCTTCAGCAGTTCAA
chr1	Tmem179b	-	205670120	unassigned	AAGAAA	0.291661	0.590811	1	N	Not Sig	ncbiRefSeq	transmembrane protein 179B [Source:RGD Symbol;Acc:1582850]	ATGCCTACTTAAGCTATCGTTCTGTCCTTTCCCATTTATTTACTTAACATCAAGAAATCC
chr1	Tmem181	+	46881526	CDS	none	-1.49624	0.724851	1	N	Not Sig	ncbiRefSeq	transmembrane protein 181 [Source:RGD Symbol;Acc:1566403]	CAGCTGAAAGACAATCCTGCATTTTCCATGCTCAACGACTCTGATGATGATGTGATTTAC
chr1	Tmem181	+	46885172	3UTR	AATAAA	0.0360044	0.846579	1	N	Not Sig	ncbiRefSeq	transmembrane protein 181 [Source:RGD Symbol;Acc:1566403]	GCAGTCACGGGGTAAATGCTTATTTATGAAAAACTCAATAAAACTCACATTTTGGGATTT
chr1	Tmem200a	+	19404916	3UTR	AATAAA	-2.31918	0.00290091	0.186719	N	Not Sig	ncbiRefSeq	transmembrane protein 200A [Source:RGD Symbol;Acc:1564024]	GTGTGTTCTTCATACCTTTGCTATCATTTTTTAAAATAAAATATACATTTCTGTTTAAAA
chr1	Tmem216	-	207196453	unassigned	ACTAAA	-0.236777	0.488938	1	N	Not Sig	ncbiRefSeq	transmembrane protein 216 [Source:RGD Symbol;Acc:1304607]	AGCAGAACAGATGACCAGGCCCAAAGCAAAGGAGAAATCAAACACAAATGTTTACTCATC
chr1	Tmem216	-	207196739	3UTR	none	-0.542087	0.266078	1	N	Not Sig	ncbiRefSeq	transmembrane protein 216 [Source:RGD Symbol;Acc:1304607]	TAACACTTTTAAGTCAGAAAAAAAAAAAAAAGAGGCATCTTAGGGAAAAGACAACCAGCC
chr1	Tmem219	-	181496193	unassigned	AATAAG	-0.026198	0.913046	1	N	Not Sig	ncbiRefSeq	transmembrane protein 219 [Source:RGD Symbol;Acc:1560566]	TCAACAAGGAAGTCCCCAGTGGGTTTTTTAAATCCAATCCCAATAAGTACCTTACACAAT
chr1	Tmem223	+	205670077	3UTR	AATAAA	-0.207062	0.618667	1	N	Not Sig	ncbiRefSeq	transmembrane protein 223 [Source:RGD Symbol;Acc:1582829]	AATCCACTAACAGCTAATAAATGGCTTCCAAAAGGCTTGATACATGCCTACTTAAGCTAT
chr1	Tmem242	-	45992712	unassigned	TATAAA	-0.0510343	0.876739	1	N	Not Sig	ncbiRefSeq	transmembrane protein 242 [Source:RGD Symbol;Acc:1307262]	TTCTTCTCTACTACTGTTACATATAAACATTGGAACACACACAGACACACACACCCCTTG
chr1	Tmem242	-	46000451	intron	AATAAA	-1.47828	0.659035	1	N	Not Sig	ncbiRefSeq	transmembrane protein 242 [Source:RGD Symbol;Acc:1307262]	ATGGTGGCCAGCATTTAGAGGGACTTTTTAAAATAACCCACATGGCCGCTGATAGCTCTC
chr1	Tmem252	+	222321944	3UTR	AATAAA	0.616007	0.176478	1	N	Not Sig	ncbiRefSeq	transmembrane protein 252 [Source:RGD Symbol;Acc:1359349]	GAATGTTGAACTCGTTTTGTGTAAATTGTGTTAGTCCATAAGACAATAAATTTTGTATTC
chr1	Tmem258	+	206853623	3UTR	AATAAA	0.0256223	1	1	N	Not Sig	ncbiRefSeq		TAATTTTTTACCATTGCTACATGTCCCACCTGCTGTTTACAATAAAGGCAGATGTGTGAC
chr1	Tmem262	+	203374484	3UTR	none	0.151192	0.856076	1	N	Not Sig	ncbiRefSeq	transmembrane protein 262 [Source:RGD Symbol;Acc:2318452]	AATTACCGAGAGGAGAGACACTGAGGCCTGGGGATTGGGGACAGGACTAAGAAGGGAGAT
chr1	Tmem262	+	203374865	CDS	AATACA	0.412026	0.5931	1	N	Not Sig	ncbiRefSeq	transmembrane protein 262 [Source:RGD Symbol;Acc:2318452]	GGTCCAGATTGGGATCACTGTCTGCTGCAGCCCGGCCGAGTCGAGACATAAGGGCGAGGA
chr1	Tmem265	+	182176600	3UTR	AATAAA	-0.554834	0.647563	1	N	Not Sig	ncbiRefSeq		AAAACCAGTCTTGATTTTATTAGAATTTGTTTTATAATAAAAATCTTTTTTGGTGGTGAA
chr1	Tmem41b	-	164012584	unassigned	AAGAAA	0.136405	0.658645	1	N	Not Sig	ncbiRefSeq	transmembrane protein 41B [Source:RGD Symbol;Acc:1310870]	GTCATGAAGAAAGAAAACTTGCTAGACATAACAATTTCACACAAAAGGACACAAGACAAA
chr1	Tmem41b	-	164013152	3UTR	TATAAA	-0.161049	0.578819	1	N	Not Sig	ncbiRefSeq	transmembrane protein 41B [Source:RGD Symbol;Acc:1310870]	CAGTATAAAATAATTAATGTCTAAAAAGTATATGCTTTGAGTATTTACTTTTAGAACCCC
chr1	Tmem86a	+	97600259	3UTR	AATAAA	0.399521	0.676971	1	N	Not Sig	ncbiRefSeq	transmembrane protein 86A [Source:RGD Symbol;Acc:1305749]	GGATGGGGTAACTCCATCCTCTACTGCCCATGTGAAAAAAATAAAATTAAATTAAAACCC
chr1	Tmem86b	+	69220468	3UTR	AGTAAA	0.982258	0.898728	1	N	Not Sig	ncbiRefSeq	transmembrane protein 86B [Source:RGD Symbol;Acc:1593455]	CCCCTTCACACTGCTCCCGAGGTCTGGTTTCTGGCTTGTCTAAGTAAAACCAATGTTGGA
chr1	Tmem91	-	81179482	unassigned	none	-0.26721	0.728776	1	N	Not Sig	ncbiRefSeq	transmembrane protein 91 [Source:RGD Symbol;Acc:2323264]	CCTGCTCTCAGATAGTCCTCCCTGTCCACCCTGGACATATCCAAGCACAGACAGACTCCG
[truncated: 16,704 more rows]

## Sheet: LAPA_APA_10min
Chromosome	gene_name	Start	End	polyA_site	count	Strand	Feature	tpm	gene_count	usage	fracA	signal	annotated_site	seq_context	gene_description
[truncated: 26,240 more rows]

## Sheet: LAPA_diff10min
APA_site_index	chrom	gene_name	odds_ratio	pval	delta_usage	pval_adj	-log10(p-value corrected)	significant	source	gene_description
[truncated: 9,037 more rows]

[truncated: 3 more sheets: TAPAS_APA_60min, LAPA_APA_60min, LAPA_diff60min]
