# Supplementary material
Source: HighWire-hosted journal article supplement (doi:10.1101/rna.080485.125)
Supplement: Supplementary_Table_5.xlsx [file Supplementary_Table_5.xlsx]

## Sheet: summarized_nonA_DG
gene_name	chrom	group	polya_median	polya_mean	counts_total	counts_blank	counts_nonA	hits_nonA	counts_C	hits_C	counts_G	hits_G	counts_U	hits_U	gene_description
A1bg	chr7	LDG_10min_LTP	163.58	163.58	1	0	1	1	1	1	0	0	0	0	alpha-1-B glycoprotein [Source:RGD Symbol;Acc:69417]
A2m	chr4	LDG_10min_LTP	61.73	76.1463	19	19	0	0	0	0	0	0	0	0	alpha-2-macroglobulin [Source:RGD Symbol;Acc:2004]
A2m	chr4	LDG_60min_LTP	101.19	107.068	29	28	1	1	0	0	0	0	1	1	alpha-2-macroglobulin [Source:RGD Symbol;Acc:2004]
A2m	chr4	RDG_10min_no_LTP	109.46	112.978	17	17	0	0	0	0	0	0	0	0	alpha-2-macroglobulin [Source:RGD Symbol;Acc:2004]
A2m	chr4	RDG_60min_no_LTP	81.3	99.2761	36	35	1	1	1	1	0	0	0	0	alpha-2-macroglobulin [Source:RGD Symbol;Acc:2004]
A3galt2	chr5	LDG_10min_LTP	127.96	107.697	3	3	0	0	0	0	0	0	0	0	alpha 1,3-galactosyltransferase 2 [Source:RGD Symbol;Acc:727913]
A3galt2	chr5	LDG_60min_LTP	96.31	91.652	5	5	0	0	0	0	0	0	0	0	alpha 1,3-galactosyltransferase 2 [Source:RGD Symbol;Acc:727913]
A3galt2	chr5	RDG_10min_no_LTP	60.15	96.8067	3	3	0	0	0	0	0	0	0	0	alpha 1,3-galactosyltransferase 2 [Source:RGD Symbol;Acc:727913]
A3galt2	chr5	RDG_60min_no_LTP	115.96	115.96	1	1	0	0	0	0	0	0	0	0	alpha 1,3-galactosyltransferase 2 [Source:RGD Symbol;Acc:727913]
AA926063	chr20	LDG_60min_LTP	121.87	121.87	1	1	0	0	0	0	0	0	0	0	AA926063gene [Source:RGD Symbol;Acc:1303072]
Aaas	chr7	LDG_10min_LTP	150.32	148.686	23	22	1	1	0	0	0	0	1	1	aladin WD repeat nucleoporin [Source:RGD Symbol;Acc:1308701]
Aaas	chr7	LDG_60min_LTP	98.585	116.646	16	14	2	2	0	0	0	0	2	2	aladin WD repeat nucleoporin [Source:RGD Symbol;Acc:1308701]
Aaas	chr7	RDG_10min_no_LTP	151.92	173.026	25	24	1	1	1	1	0	0	0	0	aladin WD repeat nucleoporin [Source:RGD Symbol;Acc:1308701]
Aaas	chr7	RDG_60min_no_LTP	136.935	150.466	36	34	2	2	1	1	1	1	0	0	aladin WD repeat nucleoporin [Source:RGD Symbol;Acc:1308701]
Aacs	chr12	LDG_10min_LTP	158.59	147.426	40	39	1	1	0	0	1	1	0	0	acetoacetyl-CoA synthetase [Source:RGD Symbol;Acc:708522]
Aacs	chr12	LDG_60min_LTP	132.525	126.994	24	24	0	0	0	0	0	0	0	0	acetoacetyl-CoA synthetase [Source:RGD Symbol;Acc:708522]
Aacs	chr12	RDG_10min_no_LTP	120.975	122.386	40	39	1	1	1	1	0	0	0	0	acetoacetyl-CoA synthetase [Source:RGD Symbol;Acc:708522]
Aacs	chr12	RDG_60min_no_LTP	134.33	140.031	58	57	1	1	1	1	0	0	0	0	acetoacetyl-CoA synthetase [Source:RGD Symbol;Acc:708522]
Aadat	chr16	LDG_10min_LTP	79.92	95.5327	11	11	0	0	0	0	0	0	0	0	aminoadipate aminotransferase [Source:RGD Symbol;Acc:2948]
Aadat	chr16	LDG_60min_LTP	147.375	135.199	8	8	0	0	0	0	0	0	0	0	aminoadipate aminotransferase [Source:RGD Symbol;Acc:2948]
Aadat	chr16	RDG_10min_no_LTP	118.315	108.784	12	12	0	0	0	0	0	0	0	0	aminoadipate aminotransferase [Source:RGD Symbol;Acc:2948]
Aadat	chr16	RDG_60min_no_LTP	118.6	115.442	17	17	0	0	0	0	0	0	0	0	aminoadipate aminotransferase [Source:RGD Symbol;Acc:2948]
Aagab	chr8	LDG_10min_LTP	112.09	114.767	54	53	1	1	0	0	0	0	1	1	alpha- and gamma-adaptin binding protein [Source:RGD Symbol;Acc:621601]
Aagab	chr8	LDG_60min_LTP	111.165	125.355	58	54	4	4	2	2	1	1	1	1	alpha- and gamma-adaptin binding protein [Source:RGD Symbol;Acc:621601]
Aagab	chr8	RDG_10min_no_LTP	131.93	141.269	61	59	2	2	1	1	1	1	0	0	alpha- and gamma-adaptin binding protein [Source:RGD Symbol;Acc:621601]
Aagab	chr8	RDG_60min_no_LTP	118.38	137.617	80	78	2	2	1	1	0	0	1	1	alpha- and gamma-adaptin binding protein [Source:RGD Symbol;Acc:621601]
Aak1	chr4	LDG_10min_LTP	121.13	132.319	290	281	9	11	4	5	4	5	1	1	AP2 associated kinase 1 [Source:RGD Symbol;Acc:1305520]
Aak1	chr4	LDG_60min_LTP	120	132.077	243	237	6	6	4	4	1	1	1	1	AP2 associated kinase 1 [Source:RGD Symbol;Acc:1305520]
Aak1	chr4	RDG_10min_no_LTP	125.34	130.621	179	176	3	3	2	2	0	0	1	1	AP2 associated kinase 1 [Source:RGD Symbol;Acc:1305520]
Aak1	chr4	RDG_60min_no_LTP	124.92	138.388	310	297	13	14	5	5	3	3	6	6	AP2 associated kinase 1 [Source:RGD Symbol;Acc:1305520]
Aamdc	chr1	LDG_10min_LTP	81.58	94.2054	13	13	0	0	0	0	0	0	0	0	adipogenesis associated, Mth938 domain containing [Source:RGD Symbol;Acc:1561459]
Aamdc	chr1	LDG_60min_LTP	88.2	97.1236	14	13	1	1	1	1	0	0	0	0	adipogenesis associated, Mth938 domain containing [Source:RGD Symbol;Acc:1561459]
Aamdc	chr1	RDG_10min_no_LTP	53.43	63.3373	15	14	1	1	1	1	0	0	0	0	adipogenesis associated, Mth938 domain containing [Source:RGD Symbol;Acc:1561459]
Aamdc	chr1	RDG_60min_no_LTP	65.45	105.824	19	18	1	1	0	0	1	1	0	0	adipogenesis associated, Mth938 domain containing [Source:RGD Symbol;Acc:1561459]
Aamp	chr9	LDG_10min_LTP	88.74	103.491	259	253	6	6	0	0	3	3	3	3	angio-associated, migratory cell protein [Source:RGD Symbol;Acc:1306281]
Aamp	chr9	LDG_60min_LTP	92.25	110.663	208	202	6	6	5	5	1	1	0	0	angio-associated, migratory cell protein [Source:RGD Symbol;Acc:1306281]
Aamp	chr9	RDG_10min_no_LTP	85.85	102.874	177	169	8	8	2	2	3	3	3	3	angio-associated, migratory cell protein [Source:RGD Symbol;Acc:1306281]
Aamp	chr9	RDG_60min_no_LTP	104.13	108.573	316	307	9	9	5	5	1	1	3	3	angio-associated, migratory cell protein [Source:RGD Symbol;Acc:1306281]
Aar2	chr3	LDG_10min_LTP	113.345	118.661	50	44	6	6	1	1	5	5	0	0	AAR2 splicing factor [Source:RGD Symbol;Acc:1311066]
Aar2	chr3	LDG_60min_LTP	106.705	114.21	42	35	7	8	1	1	6	7	0	0	AAR2 splicing factor [Source:RGD Symbol;Acc:1311066]
Aar2	chr3	RDG_10min_no_LTP	153.4	152.109	44	41	3	4	1	1	2	2	1	1	AAR2 splicing factor [Source:RGD Symbol;Acc:1311066]
Aar2	chr3	RDG_60min_no_LTP	96.765	109.246	54	48	6	7	3	3	3	3	1	1	AAR2 splicing factor [Source:RGD Symbol;Acc:1311066]
Aard	chr7	LDG_10min_LTP	131.16	128.097	11	11	0	0	0	0	0	0	0	0	alanine and arginine rich domain containing protein [Source:RGD Symbol;Acc:631378]
Aard	chr7	LDG_60min_LTP	46.87	49.6743	7	7	0	0	0	0	0	0	0	0	alanine and arginine rich domain containing protein [Source:RGD Symbol;Acc:631378]
Aard	chr7	RDG_10min_no_LTP	106.265	125.93	6	5	1	1	1	1	0	0	0	0	alanine and arginine rich domain containing protein [Source:RGD Symbol;Acc:631378]
Aard	chr7	RDG_60min_no_LTP	91.21	103.087	14	14	0	0	0	0	0	0	0	0	alanine and arginine rich domain containing protein [Source:RGD Symbol;Acc:631378]
Aars1	chr19	LDG_10min_LTP	109.8	109.565	197	192	5	5	2	2	0	0	3	3	alanyl-tRNA synthetase 1 [Source:RGD Symbol;Acc:1304832]
Aars1	chr19	LDG_60min_LTP	100.58	111.28	155	150	5	6	2	3	2	2	1	1	alanyl-tRNA synthetase 1 [Source:RGD Symbol;Acc:1304832]
Aars1	chr19	RDG_10min_no_LTP	96.78	100.793	165	164	1	1	1	1	0	0	0	0	alanyl-tRNA synthetase 1 [Source:RGD Symbol;Acc:1304832]
Aars1	chr19	RDG_60min_no_LTP	106.64	111.699	247	238	9	9	6	6	2	2	1	1	alanyl-tRNA synthetase 1 [Source:RGD Symbol;Acc:1304832]
Aars2	chr9	LDG_10min_LTP	205.54	179.618	9	8	1	1	0	0	0	0	1	1	alanyl-tRNA synthetase 2, mitochondrial [Source:RGD Symbol;Acc:1310617]
Aars2	chr9	LDG_60min_LTP	134.1	137.213	7	7	0	0	0	0	0	0	0	0	alanyl-tRNA synthetase 2, mitochondrial [Source:RGD Symbol;Acc:1310617]
Aars2	chr9	RDG_10min_no_LTP	69.25	108.489	8	8	0	0	0	0	0	0	0	0	alanyl-tRNA synthetase 2, mitochondrial [Source:RGD Symbol;Acc:1310617]
Aars2	chr9	RDG_60min_no_LTP	140.76	147.73	10	10	0	0	0	0	0	0	0	0	alanyl-tRNA synthetase 2, mitochondrial [Source:RGD Symbol;Acc:1310617]
Aarsd1	chr10	LDG_10min_LTP	72.445	84.2493	116	112	4	4	2	2	2	2	0	0	alanyl-tRNA synthetase domain containing 1 [Source:RGD Symbol;Acc:1561650]
Aarsd1	chr10	LDG_60min_LTP	71.04	88.8843	86	83	3	6	0	0	2	5	1	1	alanyl-tRNA synthetase domain containing 1 [Source:RGD Symbol;Acc:1561650]
Aarsd1	chr10	RDG_10min_no_LTP	103.55	109.209	77	74	3	3	1	1	1	1	1	1	alanyl-tRNA synthetase domain containing 1 [Source:RGD Symbol;Acc:1561650]
Aarsd1	chr10	RDG_60min_no_LTP	84.665	100.586	150	145	5	5	1	1	4	4	0	0	alanyl-tRNA synthetase domain containing 1 [Source:RGD Symbol;Acc:1561650]
Aasdh	chr14	LDG_10min_LTP	122.24	122.24	2	2	0	0	0	0	0	0	0	0	aminoadipate-semialdehyde dehydrogenase [Source:RGD Symbol;Acc:1311135]
Aasdh	chr14	LDG_60min_LTP	102.04	121.84	7	7	0	0	0	0	0	0	0	0	aminoadipate-semialdehyde dehydrogenase [Source:RGD Symbol;Acc:1311135]
Aasdh	chr14	RDG_10min_no_LTP	189.075	179.488	4	3	1	1	1	1	0	0	0	0	aminoadipate-semialdehyde dehydrogenase [Source:RGD Symbol;Acc:1311135]
Aasdh	chr14	RDG_60min_no_LTP	209.905	191.364	14	12	2	3	2	2	1	1	0	0	aminoadipate-semialdehyde dehydrogenase [Source:RGD Symbol;Acc:1311135]
Aasdhppt	chr8	LDG_10min_LTP	96.25	110.537	85	83	2	3	1	1	1	2	0	0	aminoadipate-semialdehyde dehydrogenase-phosphopantetheinyl transferase [Source:RGD Symbol;Acc:1311360]
Aasdhppt	chr8	LDG_60min_LTP	72.04	90.7845	49	49	0	0	0	0	0	0	0	0	aminoadipate-semialdehyde dehydrogenase-phosphopantetheinyl transferase [Source:RGD Symbol;Acc:1311360]
Aasdhppt	chr8	RDG_10min_no_LTP	93.125	104.414	52	51	1	1	1	1	0	0	0	0	aminoadipate-semialdehyde dehydrogenase-phosphopantetheinyl transferase [Source:RGD Symbol;Acc:1311360]
Aasdhppt	chr8	RDG_60min_no_LTP	85	93.1253	76	73	3	3	1	1	1	1	1	1	aminoadipate-semialdehyde dehydrogenase-phosphopantetheinyl transferase [Source:RGD Symbol;Acc:1311360]
Aass	chr4	LDG_10min_LTP	86.36	108.783	13	13	0	0	0	0	0	0	0	0	aminoadipate-semialdehyde synthase [Source:RGD Symbol;Acc:1310811]
Aass	chr4	LDG_60min_LTP	151.14	127.47	7	7	0	0	0	0	0	0	0	0	aminoadipate-semialdehyde synthase [Source:RGD Symbol;Acc:1310811]
Aass	chr4	RDG_10min_no_LTP	68.87	94.1787	8	8	0	0	0	0	0	0	0	0	aminoadipate-semialdehyde synthase [Source:RGD Symbol;Acc:1310811]
Aass	chr4	RDG_60min_no_LTP	147.83	134.054	8	7	1	1	1	1	0	0	0	0	aminoadipate-semialdehyde synthase [Source:RGD Symbol;Acc:1310811]
Aatf	chr10	LDG_10min_LTP	61.935	92.5614	14	13	1	1	1	1	0	0	0	0	apoptosis antagonizing transcription factor [Source:RGD Symbol;Acc:620685]
Aatf	chr10	LDG_60min_LTP	56.09	61.0933	12	12	0	0	0	0	0	0	0	0	apoptosis antagonizing transcription factor [Source:RGD Symbol;Acc:620685]
Aatf	chr10	RDG_10min_no_LTP	65.245	58.091	10	10	0	0	0	0	0	0	0	0	apoptosis antagonizing transcription factor [Source:RGD Symbol;Acc:620685]
Aatf	chr10	RDG_60min_no_LTP	89.29	99.8993	15	15	0	0	0	0	0	0	0	0	apoptosis antagonizing transcription factor [Source:RGD Symbol;Acc:620685]
Aatk	chr10	LDG_10min_LTP	112.25	123.662	188	147	41	102	37	86	2	2	11	14	apoptosis-associated tyrosine kinase [Source:RGD Symbol;Acc:1590980]
Aatk	chr10	LDG_60min_LTP	115.125	118.905	174	146	28	70	27	58	4	4	7	8	apoptosis-associated tyrosine kinase [Source:RGD Symbol;Acc:1590980]
Aatk	chr10	RDG_10min_no_LTP	116	123.042	163	126	37	87	33	68	3	4	13	15	apoptosis-associated tyrosine kinase [Source:RGD Symbol;Acc:1590980]
Aatk	chr10	RDG_60min_no_LTP	115.75	124.437	241	190	51	128	50	116	1	1	11	11	apoptosis-associated tyrosine kinase [Source:RGD Symbol;Acc:1590980]
Abat	chr10	LDG_10min_LTP	135.77	139.704	188	179	9	9	5	5	0	0	4	4	4-aminobutyrate aminotransferase [Source:RGD Symbol;Acc:620948]
Abat	chr10	LDG_60min_LTP	125.905	131.17	122	115	7	7	2	2	2	2	3	3	4-aminobutyrate aminotransferase [Source:RGD Symbol;Acc:620948]
Abat	chr10	RDG_10min_no_LTP	127.05	133.451	151	144	7	8	3	3	2	2	3	3	4-aminobutyrate aminotransferase [Source:RGD Symbol;Acc:620948]
Abat	chr10	RDG_60min_no_LTP	146.58	146.483	211	200	11	14	4	4	3	3	4	7	4-aminobutyrate aminotransferase [Source:RGD Symbol;Acc:620948]
Abca1	chr5	LDG_10min_LTP	71.2	98.8061	28	27	1	1	1	1	0	0	0	0	ATP binding cassette subfamily A member 1 [Source:RGD Symbol;Acc:631344]
Abca1	chr5	LDG_60min_LTP	112.67	120.135	25	23	2	3	2	2	0	0	1	1	ATP binding cassette subfamily A member 1 [Source:RGD Symbol;Acc:631344]
Abca1	chr5	RDG_10min_no_LTP	167.96	150.985	16	16	0	0	0	0	0	0	0	0	ATP binding cassette subfamily A member 1 [Source:RGD Symbol;Acc:631344]
Abca1	chr5	RDG_60min_no_LTP	115.02	125.789	36	34	2	2	0	0	2	2	0	0	ATP binding cassette subfamily A member 1 [Source:RGD Symbol;Acc:631344]
Abca13	chr14	LDG_10min_LTP	76.085	95.04	4	4	0	0	0	0	0	0	0	0	ATP binding cassette subfamily A member 13 [Source:RGD Symbol;Acc:1305895]
Abca13	chr14	LDG_60min_LTP	149.08	149.08	2	1	1	1	0	0	1	1	0	0	ATP binding cassette subfamily A member 13 [Source:RGD Symbol;Acc:1305895]
Abca13	chr14	RDG_10min_no_LTP	96.305	96.305	2	2	0	0	0	0	0	0	0	0	ATP binding cassette subfamily A member 13 [Source:RGD Symbol;Acc:1305895]
Abca13	chr14	RDG_60min_no_LTP	106.645	106.645	2	2	0	0	0	0	0	0	0	0	ATP binding cassette subfamily A member 13 [Source:RGD Symbol;Acc:1305895]
Abca17	chr10	LDG_10min_LTP	69.435	69.435	2	2	0	0	0	0	0	0	0	0	ATP-binding cassette, subfamily A (ABC1), member 17 [Source:RGD Symbol;Acc:1560494]
Abca17	chr10	RDG_10min_no_LTP	99.08	99.08	1	1	0	0	0	0	0	0	0	0	ATP-binding cassette, subfamily A (ABC1), member 17 [Source:RGD Symbol;Acc:1560494]
Abca2	chr3	LDG_10min_LTP	107.87	125.187	233	216	17	22	0	0	15	19	3	3	ATP binding cassette subfamily A member 2 [Source:RGD Symbol;Acc:620238]
Abca2	chr3	LDG_60min_LTP	104.41	128.534	180	155	25	32	4	5	14	17	10	10	ATP binding cassette subfamily A member 2 [Source:RGD Symbol;Acc:620238]
Abca2	chr3	RDG_10min_no_LTP	115.155	129.712	148	131	17	21	4	4	11	14	3	3	ATP binding cassette subfamily A member 2 [Source:RGD Symbol;Acc:620238]
Abca2	chr3	RDG_60min_no_LTP	120.81	135.963	229	204	25	28	3	3	19	21	4	4	ATP binding cassette subfamily A member 2 [Source:RGD Symbol;Acc:620238]
Abca3	chr10	LDG_10min_LTP	123.35	134.264	145	139	6	7	0	0	3	3	3	4	ATP binding cassette subfamily A member 3 [Source:RGD Symbol;Acc:1307174]
Abca3	chr10	LDG_60min_LTP	121.57	125.319	128	127	1	1	0	0	0	0	1	1	ATP binding cassette subfamily A member 3 [Source:RGD Symbol;Acc:1307174]
Abca3	chr10	RDG_10min_no_LTP	137	140.544	111	106	5	5	0	0	2	2	3	3	ATP binding cassette subfamily A member 3 [Source:RGD Symbol;Acc:1307174]
Abca3	chr10	RDG_60min_no_LTP	135.43	140.899	155	153	2	2	0	0	2	2	0	0	ATP binding cassette subfamily A member 3 [Source:RGD Symbol;Acc:1307174]
Abca4	chr2	RDG_60min_no_LTP	143.31	143.31	1	1	0	0	0	0	0	0	0	0	ATP binding cassette subfamily A member 4 [Source:RGD Symbol;Acc:1309445]
Abca5	chr10	LDG_10min_LTP	184.48	169.562	9	8	1	1	1	1	0	0	0	0	ATP binding cassette subfamily A member 5 [Source:RGD Symbol;Acc:628661]
Abca5	chr10	LDG_60min_LTP	157.41	182.102	4	4	0	0	0	0	0	0	0	0	ATP binding cassette subfamily A member 5 [Source:RGD Symbol;Acc:628661]
Abca5	chr10	RDG_10min_no_LTP	157	187.813	3	3	0	0	0	0	0	0	0	0	ATP binding cassette subfamily A member 5 [Source:RGD Symbol;Acc:628661]
Abca5	chr10	RDG_60min_no_LTP	112.22	157.65	11	11	0	0	0	0	0	0	0	0	ATP binding cassette subfamily A member 5 [Source:RGD Symbol;Acc:628661]
Abca6	chr10	RDG_10min_no_LTP	217.59	217.59	1	1	0	0	0	0	0	0	0	0	ATP binding cassette subfamily A member 6 [Source:RGD Symbol;Acc:1308998]
Abca7	chr7	LDG_10min_LTP	58.76	71.8933	18	17	1	1	0	0	0	0	1	1	ATP binding cassette subfamily A member 7 [Source:RGD Symbol;Acc:1303134]
Abca7	chr7	LDG_60min_LTP	93.6	125.218	13	12	1	1	0	0	0	0	1	1	ATP binding cassette subfamily A member 7 [Source:RGD Symbol;Acc:1303134]
Abca7	chr7	RDG_10min_no_LTP	126.04	151.244	19	18	1	1	0	0	0	0	1	1	ATP binding cassette subfamily A member 7 [Source:RGD Symbol;Acc:1303134]
Abca7	chr7	RDG_60min_no_LTP	68.4	98.886	25	25	0	0	0	0	0	0	0	0	ATP binding cassette subfamily A member 7 [Source:RGD Symbol;Acc:1303134]
Abca8	chr10	LDG_10min_LTP	125.035	151.058	4	4	0	0	0	0	0	0	0	0	ATP binding cassette subfamily A member 8 [Source:RGD Symbol;Acc:1307069]
Abca8	chr10	LDG_60min_LTP	116	155.14	7	6	1	1	1	1	0	0	0	0	ATP binding cassette subfamily A member 8 [Source:RGD Symbol;Acc:1307069]
Abca8	chr10	RDG_10min_no_LTP	154.96	202.235	4	4	0	0	0	0	0	0	0	0	ATP binding cassette subfamily A member 8 [Source:RGD Symbol;Acc:1307069]
Abca8	chr10	RDG_60min_no_LTP	204.82	181.059	21	21	0	0	0	0	0	0	0	0	ATP binding cassette subfamily A member 8 [Source:RGD Symbol;Acc:1307069]
Abca8a	chr10	LDG_10min_LTP	129.225	159.113	42	41	1	1	0	0	0	0	1	1	ATP-binding cassette, subfamily A (ABC1), member 8a [Source:RGD Symbol;Acc:1307333]
Abca8a	chr10	LDG_60min_LTP	162.77	190.907	56	53	3	4	0	0	2	3	1	1	ATP-binding cassette, subfamily A (ABC1), member 8a [Source:RGD Symbol;Acc:1307333]
Abca8a	chr10	RDG_10min_no_LTP	125.19	168.14	23	23	0	0	0	0	0	0	0	0	ATP-binding cassette, subfamily A (ABC1), member 8a [Source:RGD Symbol;Acc:1307333]
Abca8a	chr10	RDG_60min_no_LTP	179.04	185.736	44	42	2	2	0	0	1	1	1	1	ATP-binding cassette, subfamily A (ABC1), member 8a [Source:RGD Symbol;Acc:1307333]
Abca9	chr10	LDG_10min_LTP	176.235	176.235	2	2	0	0	0	0	0	0	0	0	ATP binding cassette subfamily A member 9 [Source:RGD Symbol;Acc:1305931]
Abca9	chr10	LDG_60min_LTP	113.28	113.203	3	3	0	0	0	0	0	0	0	0	ATP binding cassette subfamily A member 9 [Source:RGD Symbol;Acc:1305931]
Abca9	chr10	RDG_10min_no_LTP	109.105	109.105	2	2	0	0	0	0	0	0	0	0	ATP binding cassette subfamily A member 9 [Source:RGD Symbol;Acc:1305931]
Abca9	chr10	RDG_60min_no_LTP	146.57	111.177	3	3	0	0	0	0	0	0	0	0	ATP binding cassette subfamily A member 9 [Source:RGD Symbol;Acc:1305931]
Abcb10	chr19	LDG_10min_LTP	116.36	114.672	21	21	0	0	0	0	0	0	0	0	ATP binding cassette subfamily B member 10 [Source:RGD Symbol;Acc:1311222]
Abcb10	chr19	LDG_60min_LTP	133.36	122.819	21	20	1	1	0	0	1	1	0	0	ATP binding cassette subfamily B member 10 [Source:RGD Symbol;Acc:1311222]
Abcb10	chr19	RDG_10min_no_LTP	149.74	152.582	12	12	0	0	0	0	0	0	0	0	ATP binding cassette subfamily B member 10 [Source:RGD Symbol;Acc:1311222]
Abcb10	chr19	RDG_60min_no_LTP	137.555	126.998	24	24	0	0	0	0	0	0	0	0	ATP binding cassette subfamily B member 10 [Source:RGD Symbol;Acc:1311222]
Abcb11	chr3	LDG_10min_LTP	286.9	286.9	1	1	0	0	0	0	0	0	0	0	ATP binding cassette subfamily B member 11 [Source:RGD Symbol;Acc:619930]
Abcb1a	chr4	LDG_10min_LTP	84.53	103.183	21	19	2	3	1	1	1	1	1	1	ATP binding cassette subfamily B member 1A [Source:RGD Symbol;Acc:619951]
Abcb1a	chr4	LDG_60min_LTP	111.54	125.789	17	16	1	1	0	0	0	0	1	1	ATP binding cassette subfamily B member 1A [Source:RGD Symbol;Acc:619951]
Abcb1a	chr4	RDG_10min_no_LTP	84.89	97.9778	9	8	1	1	0	0	1	1	0	0	ATP binding cassette subfamily B member 1A [Source:RGD Symbol;Acc:619951]
Abcb1a	chr4	RDG_60min_no_LTP	118.3	128.505	19	18	1	1	0	0	1	1	0	0	ATP binding cassette subfamily B member 1A [Source:RGD Symbol;Acc:619951]
Abcb1b	chr4	LDG_10min_LTP	111.73	135.41	17	17	0	0	0	0	0	0	0	0	ATP-binding cassette, subfamily B (MDR/TAP), member 1B [Source:RGD Symbol;Acc:3318]
Abcb1b	chr4	LDG_60min_LTP	82.56	97.76	13	13	0	0	0	0	0	0	0	0	ATP-binding cassette, subfamily B (MDR/TAP), member 1B [Source:RGD Symbol;Acc:3318]
Abcb1b	chr4	RDG_10min_no_LTP	84.325	107.419	18	17	1	1	0	0	1	1	0	0	ATP-binding cassette, subfamily B (MDR/TAP), member 1B [Source:RGD Symbol;Acc:3318]
Abcb1b	chr4	RDG_60min_no_LTP	112.65	113.165	14	13	1	1	0	0	1	1	0	0	ATP-binding cassette, subfamily B (MDR/TAP), member 1B [Source:RGD Symbol;Acc:3318]
Abcb4	chr4	LDG_10min_LTP	225.92	198.32	8	7	1	1	1	1	0	0	0	0	ATP binding cassette subfamily B member 4 [Source:RGD Symbol;Acc:620248]
Abcb4	chr4	LDG_60min_LTP	183.175	165.965	6	5	1	1	1	1	0	0	0	0	ATP binding cassette subfamily B member 4 [Source:RGD Symbol;Acc:620248]
Abcb4	chr4	RDG_10min_no_LTP	67.145	102.377	6	6	0	0	0	0	0	0	0	0	ATP binding cassette subfamily B member 4 [Source:RGD Symbol;Acc:620248]
Abcb4	chr4	RDG_60min_no_LTP	187.07	204.55	3	3	0	0	0	0	0	0	0	0	ATP binding cassette subfamily B member 4 [Source:RGD Symbol;Acc:620248]
Abcb6	chr9	LDG_10min_LTP	92.85	131.6	35	34	1	1	0	0	0	0	1	1	ATP binding cassette subfamily B member 6 [Source:RGD Symbol;Acc:71077]
Abcb6	chr9	LDG_60min_LTP	97.305	156.861	34	33	1	1	0	0	1	1	0	0	ATP binding cassette subfamily B member 6 [Source:RGD Symbol;Acc:71077]
Abcb6	chr9	RDG_10min_no_LTP	78.04	120.907	33	32	1	1	0	0	1	1	0	0	ATP binding cassette subfamily B member 6 [Source:RGD Symbol;Acc:71077]
Abcb6	chr9	RDG_60min_no_LTP	75.7	131.833	41	40	1	1	0	0	1	1	0	0	ATP binding cassette subfamily B member 6 [Source:RGD Symbol;Acc:71077]
Abcb7	chrX	LDG_10min_LTP	94.59	125.995	11	10	1	1	0	0	1	1	0	0	ATP binding cassette subfamily B member 7 [Source:RGD Symbol;Acc:1303086]
Abcb7	chrX	LDG_60min_LTP	117.145	147.565	10	9	1	1	0	0	1	1	0	0	ATP binding cassette subfamily B member 7 [Source:RGD Symbol;Acc:1303086]
Abcb7	chrX	RDG_10min_no_LTP	112.785	116.84	4	4	0	0	0	0	0	0	0	0	ATP binding cassette subfamily B member 7 [Source:RGD Symbol;Acc:1303086]
Abcb7	chrX	RDG_60min_no_LTP	86.91	102.203	14	12	2	2	0	0	0	0	2	2	ATP binding cassette subfamily B member 7 [Source:RGD Symbol;Acc:1303086]
Abcb8	chr4	LDG_10min_LTP	126	127.085	61	56	5	5	2	2	0	0	3	3	ATP binding cassette subfamily B member 8 [Source:RGD Symbol;Acc:1307655]
Abcb8	chr4	LDG_60min_LTP	95.665	110.734	50	47	3	3	2	2	1	1	0	0	ATP binding cassette subfamily B member 8 [Source:RGD Symbol;Acc:1307655]
Abcb8	chr4	RDG_10min_no_LTP	118.14	126.822	51	48	3	3	0	0	2	2	1	1	ATP binding cassette subfamily B member 8 [Source:RGD Symbol;Acc:1307655]
Abcb8	chr4	RDG_60min_no_LTP	130.83	137.48	68	67	1	1	0	0	0	0	1	1	ATP binding cassette subfamily B member 8 [Source:RGD Symbol;Acc:1307655]
Abcb9	chr12	LDG_10min_LTP	107.945	113.642	52	52	0	0	0	0	0	0	0	0	ATP binding cassette subfamily B member 9 [Source:RGD Symbol;Acc:620254]
Abcb9	chr12	LDG_60min_LTP	111.64	116.698	40	38	2	2	0	0	0	0	2	2	ATP binding cassette subfamily B member 9 [Source:RGD Symbol;Acc:620254]
Abcb9	chr12	RDG_10min_no_LTP	136.79	132.887	28	26	2	2	1	1	1	1	0	0	ATP binding cassette subfamily B member 9 [Source:RGD Symbol;Acc:620254]
Abcb9	chr12	RDG_60min_no_LTP	108.61	114.738	54	50	4	4	2	2	1	1	1	1	ATP binding cassette subfamily B member 9 [Source:RGD Symbol;Acc:620254]
Abcc1	chr10	LDG_10min_LTP	207.44	186.359	18	16	2	2	1	1	1	1	0	0	ATP binding cassette subfamily C member 1 [Source:RGD Symbol;Acc:3112]
Abcc1	chr10	LDG_60min_LTP	179.91	178.001	17	17	0	0	0	0	0	0	0	0	ATP binding cassette subfamily C member 1 [Source:RGD Symbol;Acc:3112]
Abcc1	chr10	RDG_10min_no_LTP	136.165	136.284	16	16	0	0	0	0	0	0	0	0	ATP binding cassette subfamily C member 1 [Source:RGD Symbol;Acc:3112]
Abcc1	chr10	RDG_60min_no_LTP	187.955	181.4	26	26	0	0	0	0	0	0	0	0	ATP binding cassette subfamily C member 1 [Source:RGD Symbol;Acc:3112]
Abcc10	chr9	LDG_10min_LTP	161.03	179.168	6	6	0	0	0	0	0	0	0	0	ATP binding cassette subfamily C member 10 [Source:RGD Symbol;Acc:1306696]
Abcc10	chr9	LDG_60min_LTP	117.39	136.513	6	6	0	0	0	0	0	0	0	0	ATP binding cassette subfamily C member 10 [Source:RGD Symbol;Acc:1306696]
Abcc10	chr9	RDG_10min_no_LTP	291.655	288.02	4	4	0	0	0	0	0	0	0	0	ATP binding cassette subfamily C member 10 [Source:RGD Symbol;Acc:1306696]
Abcc10	chr9	RDG_60min_no_LTP	134.48	136.807	13	13	0	0	0	0	0	0	0	0	ATP binding cassette subfamily C member 10 [Source:RGD Symbol;Acc:1306696]
Abcc2	chr1	LDG_10min_LTP	127.6	120.868	5	5	0	0	0	0	0	0	0	0	ATP binding cassette subfamily C member 2 [Source:RGD Symbol;Acc:2366]
Abcc2	chr1	LDG_60min_LTP	40.88	40.88	1	1	0	0	0	0	0	0	0	0	ATP binding cassette subfamily C member 2 [Source:RGD Symbol;Acc:2366]
Abcc2	chr1	RDG_10min_no_LTP	70.96	70.96	1	1	0	0	0	0	0	0	0	0	ATP binding cassette subfamily C member 2 [Source:RGD Symbol;Acc:2366]
Abcc2	chr1	RDG_60min_no_LTP	19.16	35.6033	3	3	0	0	0	0	0	0	0	0	ATP binding cassette subfamily C member 2 [Source:RGD Symbol;Acc:2366]
Abcc3	chr10	LDG_10min_LTP	102.65	102.65	1	1	0	0	0	0	0	0	0	0	ATP binding cassette subfamily C member 3 [Source:RGD Symbol;Acc:71101]
Abcc3	chr10	LDG_60min_LTP	123.48	123.48	1	1	0	0	0	0	0	0	0	0	ATP binding cassette subfamily C member 3 [Source:RGD Symbol;Acc:71101]
Abcc3	chr10	RDG_60min_no_LTP	128.455	128.455	2	2	0	0	0	0	0	0	0	0	ATP binding cassette subfamily C member 3 [Source:RGD Symbol;Acc:71101]
Abcc4	chr15	LDG_10min_LTP	184.22	163.596	12	12	0	0	0	0	0	0	0	0	ATP binding cassette subfamily C member 4 [Source:RGD Symbol;Acc:620266]
Abcc4	chr15	LDG_60min_LTP	85.5	116.272	6	6	0	0	0	0	0	0	0	0	ATP binding cassette subfamily C member 4 [Source:RGD Symbol;Acc:620266]
Abcc4	chr15	RDG_10min_no_LTP	92.16	108.102	10	7	3	3	1	1	1	1	1	1	ATP binding cassette subfamily C member 4 [Source:RGD Symbol;Acc:620266]
Abcc4	chr15	RDG_60min_no_LTP	119.72	141.75	15	14	1	1	0	0	0	0	1	1	ATP binding cassette subfamily C member 4 [Source:RGD Symbol;Acc:620266]
Abcc5	chr11	LDG_10min_LTP	166.21	172.84	61	59	2	2	1	1	0	0	1	1	ATP binding cassette subfamily C member 5 [Source:RGD Symbol;Acc:70913]
Abcc5	chr11	LDG_60min_LTP	172.78	192.128	64	61	3	3	0	0	0	0	3	3	ATP binding cassette subfamily C member 5 [Source:RGD Symbol;Acc:70913]
Abcc5	chr11	RDG_10min_no_LTP	177.07	168.754	51	51	0	0	0	0	0	0	0	0	ATP binding cassette subfamily C member 5 [Source:RGD Symbol;Acc:70913]
Abcc5	chr11	RDG_60min_no_LTP	144.86	166.989	70	66	4	6	2	3	1	1	2	2	ATP binding cassette subfamily C member 5 [Source:RGD Symbol;Acc:70913]
Abcc6	chr1	LDG_60min_LTP	25.5	25.5	1	1	0	0	0	0	0	0	0	0	ATP binding cassette subfamily C member 6 [Source:RGD Symbol;Acc:620268]
Abcc6	chr1	RDG_10min_no_LTP	160.92	160.92	1	1	0	0	0	0	0	0	0	0	ATP binding cassette subfamily C member 6 [Source:RGD Symbol;Acc:620268]
Abcc8	chr1	LDG_10min_LTP	110.39	121.978	30	27	3	3	0	0	2	2	1	1	ATP binding cassette subfamily C member 8 [Source:RGD Symbol;Acc:3786]
Abcc8	chr1	LDG_60min_LTP	147.1	161.518	28	26	2	2	1	1	1	1	0	0	ATP binding cassette subfamily C member 8 [Source:RGD Symbol;Acc:3786]
Abcc8	chr1	RDG_10min_no_LTP	128.98	133.309	22	21	1	1	0	0	1	1	0	0	ATP binding cassette subfamily C member 8 [Source:RGD Symbol;Acc:3786]
Abcc8	chr1	RDG_60min_no_LTP	144.67	146.096	35	34	1	1	0	0	0	0	1	1	ATP binding cassette subfamily C member 8 [Source:RGD Symbol;Acc:3786]
Abcc9	chr4	LDG_10min_LTP	61.04	82.3311	9	9	0	0	0	0	0	0	0	0	ATP binding cassette subfamily C member 9 [Source:RGD Symbol;Acc:3787]
Abcc9	chr4	LDG_60min_LTP	210.88	202.737	7	7	0	0	0	0	0	0	0	0	ATP binding cassette subfamily C member 9 [Source:RGD Symbol;Acc:3787]
Abcc9	chr4	RDG_10min_no_LTP	121.425	121.425	2	2	0	0	0	0	0	0	0	0	ATP binding cassette subfamily C member 9 [Source:RGD Symbol;Acc:3787]
Abcc9	chr4	RDG_60min_no_LTP	68.33	102.548	9	9	0	0	0	0	0	0	0	0	ATP binding cassette subfamily C member 9 [Source:RGD Symbol;Acc:3787]
Abcd1	chrX	LDG_10min_LTP	102.14	134.119	14	13	1	1	1	1	0	0	0	0	ATP binding cassette subfamily D member 1 [Source:RGD Symbol;Acc:1562128]
Abcd1	chrX	LDG_60min_LTP	119.28	119.28	2	2	0	0	0	0	0	0	0	0	ATP binding cassette subfamily D member 1 [Source:RGD Symbol;Acc:1562128]
Abcd1	chrX	RDG_10min_no_LTP	55.47	68.026	10	10	0	0	0	0	0	0	0	0	ATP binding cassette subfamily D member 1 [Source:RGD Symbol;Acc:1562128]
Abcd1	chrX	RDG_60min_no_LTP	122.68	134.7	21	21	0	0	0	0	0	0	0	0	ATP binding cassette subfamily D member 1 [Source:RGD Symbol;Acc:1562128]
Abcd2	chr7	LDG_10min_LTP	107.285	116.91	42	41	1	1	1	1	0	0	0	0	ATP binding cassette subfamily D member 2 [Source:RGD Symbol;Acc:69244]
Abcd2	chr7	LDG_60min_LTP	83.27	98.0703	35	34	1	1	1	1	0	0	0	0	ATP binding cassette subfamily D member 2 [Source:RGD Symbol;Acc:69244]
Abcd2	chr7	RDG_10min_no_LTP	90.78	115.063	15	15	0	0	0	0	0	0	0	0	ATP binding cassette subfamily D member 2 [Source:RGD Symbol;Acc:69244]
Abcd2	chr7	RDG_60min_no_LTP	86.16	91.2028	32	31	1	1	1	1	0	0	0	0	ATP binding cassette subfamily D member 2 [Source:RGD Symbol;Acc:69244]
Abcd3	chr2	LDG_10min_LTP	142.105	140.548	102	96	6	7	2	2	2	2	3	3	ATP binding cassette subfamily D member 3 [Source:RGD Symbol;Acc:2007]
Abcd3	chr2	LDG_60min_LTP	141.765	142.494	74	72	2	2	0	0	1	1	1	1	ATP binding cassette subfamily D member 3 [Source:RGD Symbol;Acc:2007]
Abcd3	chr2	RDG_10min_no_LTP	138.59	143.069	67	65	2	2	1	1	0	0	1	1	ATP binding cassette subfamily D member 3 [Source:RGD Symbol;Acc:2007]
Abcd3	chr2	RDG_60min_no_LTP	140.31	147.853	138	130	8	8	3	3	2	2	3	3	ATP binding cassette subfamily D member 3 [Source:RGD Symbol;Acc:2007]
Abcd4	chr6	LDG_10min_LTP	148.35	171.292	4	4	0	0	0	0	0	0	0	0	ATP binding cassette subfamily D member 4 [Source:RGD Symbol;Acc:1307273]
Abcd4	chr6	LDG_60min_LTP	143.14	145.316	5	4	1	1	0	0	0	0	1	1	ATP binding cassette subfamily D member 4 [Source:RGD Symbol;Acc:1307273]
Abcd4	chr6	RDG_10min_no_LTP	102.35	135.746	5	5	0	0	0	0	0	0	0	0	ATP binding cassette subfamily D member 4 [Source:RGD Symbol;Acc:1307273]
Abcd4	chr6	RDG_60min_no_LTP	212.04	220.998	4	4	0	0	0	0	0	0	0	0	ATP binding cassette subfamily D member 4 [Source:RGD Symbol;Acc:1307273]
Abce1	chr19	LDG_10min_LTP	85.125	102.104	112	110	2	2	1	1	1	1	0	0	ATP binding cassette subfamily E member 1 [Source:RGD Symbol;Acc:1305301]
Abce1	chr19	LDG_60min_LTP	84.96	99.7246	83	81	2	2	2	2	0	0	0	0	ATP binding cassette subfamily E member 1 [Source:RGD Symbol;Acc:1305301]
Abce1	chr19	RDG_10min_no_LTP	114.5	118.064	93	89	4	4	1	1	3	3	0	0	ATP binding cassette subfamily E member 1 [Source:RGD Symbol;Acc:1305301]
Abce1	chr19	RDG_60min_no_LTP	97.795	115.968	138	134	4	5	1	1	2	3	1	1	ATP binding cassette subfamily E member 1 [Source:RGD Symbol;Acc:1305301]
Abcf1	chr20	LDG_10min_LTP	104.19	108.051	107	103	4	4	2	2	1	1	1	1	ATP binding cassette subfamily F member 1 [Source:RGD Symbol;Acc:620286]
Abcf1	chr20	LDG_60min_LTP	110.725	118.622	84	80	4	4	3	3	0	0	1	1	ATP binding cassette subfamily F member 1 [Source:RGD Symbol;Acc:620286]
Abcf1	chr20	RDG_10min_no_LTP	97.39	105.368	71	71	0	0	0	0	0	0	0	0	ATP binding cassette subfamily F member 1 [Source:RGD Symbol;Acc:620286]
Abcf1	chr20	RDG_60min_no_LTP	101.93	116.401	94	89	5	5	0	0	0	0	5	5	ATP binding cassette subfamily F member 1 [Source:RGD Symbol;Acc:620286]
Abcf2	chr4	LDG_10min_LTP	122.92	130.389	113	108	5	5	1	1	1	1	3	3	ATP binding cassette subfamily F member 2 [Source:RGD Symbol;Acc:1304942]
Abcf2	chr4	LDG_60min_LTP	100.625	115.072	86	82	4	4	1	1	3	3	0	0	ATP binding cassette subfamily F member 2 [Source:RGD Symbol;Acc:1304942]
Abcf2	chr4	RDG_10min_no_LTP	115.78	132.517	82	79	3	6	1	1	1	4	1	1	ATP binding cassette subfamily F member 2 [Source:RGD Symbol;Acc:1304942]
Abcf2	chr4	RDG_60min_no_LTP	116.935	128.855	108	104	4	4	2	2	0	0	2	2	ATP binding cassette subfamily F member 2 [Source:RGD Symbol;Acc:1304942]
Abcf3	chr11	LDG_10min_LTP	116.945	127.052	68	67	1	1	0	0	0	0	1	1	ATP binding cassette subfamily F member 3 [Source:RGD Symbol;Acc:1310468]
Abcf3	chr11	LDG_60min_LTP	116.77	113.488	65	64	1	1	0	0	0	0	1	1	ATP binding cassette subfamily F member 3 [Source:RGD Symbol;Acc:1310468]
Abcf3	chr11	RDG_10min_no_LTP	113.85	122.231	57	56	1	1	1	1	0	0	0	0	ATP binding cassette subfamily F member 3 [Source:RGD Symbol;Acc:1310468]
Abcf3	chr11	RDG_60min_no_LTP	120.195	130.156	96	91	5	6	1	1	3	4	1	1	ATP binding cassette subfamily F member 3 [Source:RGD Symbol;Acc:1310468]
Abcg1	chr20	LDG_10min_LTP	107.96	115.591	69	36	33	38	2	2	1	1	30	35	ATP binding cassette subfamily G member 1 [Source:RGD Symbol;Acc:620294]
Abcg1	chr20	LDG_60min_LTP	116.27	129.387	52	29	23	23	2	2	0	0	21	21	ATP binding cassette subfamily G member 1 [Source:RGD Symbol;Acc:620294]
Abcg1	chr20	RDG_10min_no_LTP	147.715	144.946	44	16	28	34	2	2	2	2	24	30	ATP binding cassette subfamily G member 1 [Source:RGD Symbol;Acc:620294]
Abcg1	chr20	RDG_60min_no_LTP	125.86	121.305	72	37	35	47	3	5	3	3	32	39	ATP binding cassette subfamily G member 1 [Source:RGD Symbol;Acc:620294]
Abcg2	chr4	LDG_10min_LTP	87.5	80.6738	13	13	0	0	0	0	0	0	0	0	ATP binding cassette subfamily G member 2 [Source:RGD Symbol;Acc:631345]
Abcg2	chr4	LDG_60min_LTP	107	119.506	9	9	0	0	0	0	0	0	0	0	ATP binding cassette subfamily G member 2 [Source:RGD Symbol;Acc:631345]
Abcg2	chr4	RDG_10min_no_LTP	80.8	105.327	10	10	0	0	0	0	0	0	0	0	ATP binding cassette subfamily G member 2 [Source:RGD Symbol;Acc:631345]
Abcg2	chr4	RDG_60min_no_LTP	59.21	66.3411	9	9	0	0	0	0	0	0	0	0	ATP binding cassette subfamily G member 2 [Source:RGD Symbol;Acc:631345]
Abcg3l1	chr14	LDG_10min_LTP	181.12	201.186	5	4	1	2	1	1	1	1	0	0	ATP-binding cassette, subfamily G (WHITE), member 3-like 1 [Source:RGD Symbol;Acc:1303294]
Abcg3l1	chr14	LDG_60min_LTP	49.615	63.9625	4	4	0	0	0	0	0	0	0	0	ATP-binding cassette, subfamily G (WHITE), member 3-like 1 [Source:RGD Symbol;Acc:1303294]
Abcg3l1	chr14	RDG_10min_no_LTP	227.54	170.877	3	3	0	0	0	0	0	0	0	0	ATP-binding cassette, subfamily G (WHITE), member 3-like 1 [Source:RGD Symbol;Acc:1303294]
Abcg3l1	chr14	RDG_60min_no_LTP	201.59	160.233	7	6	1	1	1	1	0	0	0	0	ATP-binding cassette, subfamily G (WHITE), member 3-like 1 [Source:RGD Symbol;Acc:1303294]
Abcg3l2	chr14	LDG_10min_LTP	173.09	168.042	4	4	0	0	0	0	0	0	0	0	ATP-binding cassette, subfamily G (WHITE), member 3-like 2 [Source:RGD Symbol;Acc:1359703]
Abcg3l2	chr14	LDG_60min_LTP	22.59	22.59	1	1	0	0	0	0	0	0	0	0	ATP-binding cassette, subfamily G (WHITE), member 3-like 2 [Source:RGD Symbol;Acc:1359703]
Abcg3l2	chr14	RDG_10min_no_LTP	114.375	114.375	2	2	0	0	0	0	0	0	0	0	ATP-binding cassette, subfamily G (WHITE), member 3-like 2 [Source:RGD Symbol;Acc:1359703]
Abcg3l2	chr14	RDG_60min_no_LTP	267.74	246.99	4	4	0	0	0	0	0	0	0	0	ATP-binding cassette, subfamily G (WHITE), member 3-like 2 [Source:RGD Symbol;Acc:1359703]
Abcg3l3	chr14	LDG_60min_LTP	205.13	205.13	1	1	0	0	0	0	0	0	0	0	ATP-binding cassette, subfamily G (WHITE), member 3-like 3 [Source:RGD Symbol;Acc:1564709]
Abcg3l4	chr14	LDG_10min_LTP	206.82	206.82	1	1	0	0	0	0	0	0	0	0	ATP-binding cassette, subfamily G (WHITE), member 3-like 4 [Source:RGD Symbol;Acc:1588538]
Abcg3l4	chr14	LDG_60min_LTP	63.19	63.19	1	1	0	0	0	0	0	0	0	0	ATP-binding cassette, subfamily G (WHITE), member 3-like 4 [Source:RGD Symbol;Acc:1588538]
Abcg3l4	chr14	RDG_60min_no_LTP	119.59	119.59	1	1	0	0	0	0	0	0	0	0	ATP-binding cassette, subfamily G (WHITE), member 3-like 4 [Source:RGD Symbol;Acc:1588538]
Abcg4	chr8	LDG_10min_LTP	128.92	138.832	49	45	4	4	3	3	1	1	0	0	ATP binding cassette subfamily G member 4 [Source:RGD Symbol;Acc:1305840]
Abcg4	chr8	LDG_60min_LTP	103.65	105.21	42	41	1	1	0	0	1	1	0	0	ATP binding cassette subfamily G member 4 [Source:RGD Symbol;Acc:1305840]
Abcg4	chr8	RDG_10min_no_LTP	113.12	136.978	37	36	1	1	1	1	0	0	0	0	ATP binding cassette subfamily G member 4 [Source:RGD Symbol;Acc:1305840]
Abcg4	chr8	RDG_60min_no_LTP	117.455	132.181	70	68	2	2	2	2	0	0	0	0	ATP binding cassette subfamily G member 4 [Source:RGD Symbol;Acc:1305840]
Abcg5	chr6	LDG_10min_LTP	53.03	53.03	2	2	0	0	0	0	0	0	0	0	ATP binding cassette subfamily G member 5 [Source:RGD Symbol;Acc:620298]
Abcg5	chr6	LDG_60min_LTP	35.19	68.3367	3	3	0	0	0	0	0	0	0	0	ATP binding cassette subfamily G member 5 [Source:RGD Symbol;Acc:620298]
Abcg5	chr6	RDG_10min_no_LTP	199.58	199.58	1	1	0	0	0	0	0	0	0	0	ATP binding cassette subfamily G member 5 [Source:RGD Symbol;Acc:620298]
Abhd1	chr6	LDG_10min_LTP	85.4	105.095	36	36	0	0	0	0	0	0	0	0	abhydrolase domain containing 1 [Source:RGD Symbol;Acc:1310988]
Abhd1	chr6	LDG_60min_LTP	88.395	106.831	34	34	0	0	0	0	0	0	0	0	abhydrolase domain containing 1 [Source:RGD Symbol;Acc:1310988]
Abhd1	chr6	RDG_10min_no_LTP	65.335	84.18	20	20	0	0	0	0	0	0	0	0	abhydrolase domain containing 1 [Source:RGD Symbol;Acc:1310988]
Abhd1	chr6	RDG_60min_no_LTP	95.7	107.357	40	40	0	0	0	0	0	0	0	0	abhydrolase domain containing 1 [Source:RGD Symbol;Acc:1310988]
Abhd10	chr11	LDG_10min_LTP	92.81	108.645	25	25	0	0	0	0	0	0	0	0	abhydrolase domain containing 10, depalmitoylase [Source:RGD Symbol;Acc:1308084]
Abhd10	chr11	LDG_60min_LTP	119.825	117.885	20	18	2	2	0	0	2	2	0	0	abhydrolase domain containing 10, depalmitoylase [Source:RGD Symbol;Acc:1308084]
Abhd10	chr11	RDG_10min_no_LTP	141.51	137.25	24	22	2	2	1	1	1	1	0	0	abhydrolase domain containing 10, depalmitoylase [Source:RGD Symbol;Acc:1308084]
Abhd10	chr11	RDG_60min_no_LTP	106.13	126.754	43	42	1	1	1	1	0	0	0	0	abhydrolase domain containing 10, depalmitoylase [Source:RGD Symbol;Acc:1308084]
Abhd11	chr12	LDG_10min_LTP	103.17	106.933	23	23	0	0	0	0	0	0	0	0	abhydrolase domain containing 11 [Source:RGD Symbol;Acc:1304681]
Abhd11	chr12	LDG_60min_LTP	131.04	158.65	7	6	1	1	0	0	1	1	0	0	abhydrolase domain containing 11 [Source:RGD Symbol;Acc:1304681]
Abhd11	chr12	RDG_10min_no_LTP	27.17	66.4673	11	10	1	1	0	0	1	1	0	0	abhydrolase domain containing 11 [Source:RGD Symbol;Acc:1304681]
Abhd11	chr12	RDG_60min_no_LTP	163.315	159.728	18	18	0	0	0	0	0	0	0	0	abhydrolase domain containing 11 [Source:RGD Symbol;Acc:1304681]
Abhd11-as1	chr12	LDG_10min_LTP	53.9	53.9	1	1	0	0	0	0	0	0	0	0
Abhd12	chr3	LDG_10min_LTP	106.68	117.941	280	272	8	10	1	2	6	7	1	1	abhydrolase domain containing 12, lysophospholipase [Source:RGD Symbol;Acc:1562570]
Abhd12	chr3	LDG_60min_LTP	107.425	116.38	220	213	7	7	3	3	1	1	3	3	abhydrolase domain containing 12, lysophospholipase [Source:RGD Symbol;Acc:1562570]
Abhd12	chr3	RDG_10min_no_LTP	108.745	118.783	194	187	7	10	0	0	2	4	5	6	abhydrolase domain containing 12, lysophospholipase [Source:RGD Symbol;Acc:1562570]
Abhd12	chr3	RDG_60min_no_LTP	120.04	133.632	298	289	9	10	2	2	6	6	2	2	abhydrolase domain containing 12, lysophospholipase [Source:RGD Symbol;Acc:1562570]
Abhd13	chr16	LDG_10min_LTP	108.225	108.348	44	44	0	0	0	0	0	0	0	0	abhydrolase domain containing 13 [Source:RGD Symbol;Acc:1308317]
Abhd13	chr16	LDG_60min_LTP	115.87	127.454	37	32	5	5	4	4	0	0	1	1	abhydrolase domain containing 13 [Source:RGD Symbol;Acc:1308317]
Abhd13	chr16	RDG_10min_no_LTP	115.88	123.374	43	41	2	4	1	1	1	2	1	1	abhydrolase domain containing 13 [Source:RGD Symbol;Acc:1308317]
Abhd13	chr16	RDG_60min_no_LTP	129.36	126.744	65	63	2	2	1	1	0	0	1	1	abhydrolase domain containing 13 [Source:RGD Symbol;Acc:1308317]
Abhd14a	chr8	LDG_10min_LTP	94.82	120.35	31	30	1	1	0	0	0	0	1	1	abhydrolase domain containing 14A [Source:RGD Symbol;Acc:1309721]
Abhd14a	chr8	LDG_60min_LTP	72.765	121.788	18	18	0	0	0	0	0	0	0	0	abhydrolase domain containing 14A [Source:RGD Symbol;Acc:1309721]
Abhd14a	chr8	RDG_10min_no_LTP	88.39	134.407	17	16	1	1	0	0	0	0	1	1	abhydrolase domain containing 14A [Source:RGD Symbol;Acc:1309721]
Abhd14a	chr8	RDG_60min_no_LTP	137.12	146.22	26	24	2	2	0	0	1	1	1	1	abhydrolase domain containing 14A [Source:RGD Symbol;Acc:1309721]
Abhd14b	chr8	LDG_10min_LTP	85.215	92.9093	28	28	0	0	0	0	0	0	0	0	abhydrolase domain containing 14b [Source:RGD Symbol;Acc:1359649]
Abhd14b	chr8	LDG_60min_LTP	98.07	99.5635	26	26	0	0	0	0	0	0	0	0	abhydrolase domain containing 14b [Source:RGD Symbol;Acc:1359649]
Abhd14b	chr8	RDG_10min_no_LTP	97.71	109.631	17	17	0	0	0	0	0	0	0	0	abhydrolase domain containing 14b [Source:RGD Symbol;Acc:1359649]
Abhd14b	chr8	RDG_60min_no_LTP	96.65	115.2	31	30	1	1	0	0	0	0	1	1	abhydrolase domain containing 14b [Source:RGD Symbol;Acc:1359649]
Abhd15	chr10	RDG_10min_no_LTP	47.81	47.81	1	1	0	0	0	0	0	0	0	0	abhydrolase domain containing 15 [Source:RGD Symbol;Acc:1304598]
Abhd15	chr10	RDG_60min_no_LTP	59.23	59.23	1	1	0	0	0	0	0	0	0	0	abhydrolase domain containing 15 [Source:RGD Symbol;Acc:1304598]
Abhd16a	chr20	LDG_10min_LTP	105.375	110.686	124	123	1	1	0	0	0	0	1	1	abhydrolase domain containing 16A, phospholipase [Source:RGD Symbol;Acc:1303164]
Abhd16a	chr20	LDG_60min_LTP	74.83	96.9569	100	96	4	4	1	1	1	1	2	2	abhydrolase domain containing 16A, phospholipase [Source:RGD Symbol;Acc:1303164]
Abhd16a	chr20	RDG_10min_no_LTP	115.5	122.16	91	88	3	3	2	2	0	0	1	1	abhydrolase domain containing 16A, phospholipase [Source:RGD Symbol;Acc:1303164]
Abhd16a	chr20	RDG_60min_no_LTP	107.12	125.329	126	126	0	0	0	0	0	0	0	0	abhydrolase domain containing 16A, phospholipase [Source:RGD Symbol;Acc:1303164]
Abhd17a	chr7	LDG_10min_LTP	80.85	92.0143	348	338	10	11	4	4	3	4	3	3	abhydrolase domain containing 17A, depalmitoylase [Source:RGD Symbol;Acc:1359682]
Abhd17a	chr7	LDG_60min_LTP	78.27	90.3981	263	254	9	11	3	4	1	2	5	5	abhydrolase domain containing 17A, depalmitoylase [Source:RGD Symbol;Acc:1359682]
Abhd17a	chr7	RDG_10min_no_LTP	90.58	98.796	248	238	10	14	4	5	5	8	1	1	abhydrolase domain containing 17A, depalmitoylase [Source:RGD Symbol;Acc:1359682]
Abhd17a	chr7	RDG_60min_no_LTP	95.41	103.416	343	332	11	13	5	5	5	6	2	2	abhydrolase domain containing 17A, depalmitoylase [Source:RGD Symbol;Acc:1359682]
Abhd17b	chr1	LDG_10min_LTP	92.42	104.917	89	87	2	2	1	1	1	1	0	0	abhydrolase domain containing 17B, depalmitoylase [Source:RGD Symbol;Acc:1305246]
Abhd17b	chr1	LDG_60min_LTP	131.55	127.59	66	62	4	4	0	0	1	1	3	3	abhydrolase domain containing 17B, depalmitoylase [Source:RGD Symbol;Acc:1305246]
Abhd17b	chr1	RDG_10min_no_LTP	98.05	101.68	72	69	3	4	1	1	1	2	1	1	abhydrolase domain containing 17B, depalmitoylase [Source:RGD Symbol;Acc:1305246]
Abhd17b	chr1	RDG_60min_no_LTP	115.805	118.848	138	136	2	4	0	0	0	0	2	4	abhydrolase domain containing 17B, depalmitoylase [Source:RGD Symbol;Acc:1305246]
Abhd17c	chr1	LDG_10min_LTP	118.23	124.735	87	83	4	4	2	2	1	1	1	1	abhydrolase domain containing 17C, depalmitoylase [Source:RGD Symbol;Acc:1308210]
Abhd17c	chr1	LDG_60min_LTP	93.36	99.0203	59	56	3	3	1	1	2	2	0	0	abhydrolase domain containing 17C, depalmitoylase [Source:RGD Symbol;Acc:1308210]
Abhd17c	chr1	RDG_10min_no_LTP	112.83	123.404	69	68	1	2	1	2	0	0	0	0	abhydrolase domain containing 17C, depalmitoylase [Source:RGD Symbol;Acc:1308210]
Abhd17c	chr1	RDG_60min_no_LTP	106.095	105.82	90	89	1	1	0	0	0	0	1	1	abhydrolase domain containing 17C, depalmitoylase [Source:RGD Symbol;Acc:1308210]
Abhd18	chr2	LDG_10min_LTP	278.54	271.2	3	3	0	0	0	0	0	0	0	0	abhydrolase domain containing 18 [Source:RGD Symbol;Acc:1563987]
Abhd18	chr2	LDG_60min_LTP	320.5	320.5	1	1	0	0	0	0	0	0	0	0	abhydrolase domain containing 18 [Source:RGD Symbol;Acc:1563987]
Abhd18	chr2	RDG_10min_no_LTP	122.43	150.683	3	3	0	0	0	0	0	0	0	0	abhydrolase domain containing 18 [Source:RGD Symbol;Acc:1563987]
Abhd18	chr2	RDG_60min_no_LTP	165.445	171.028	4	4	0	0	0	0	0	0	0	0	abhydrolase domain containing 18 [Source:RGD Symbol;Acc:1563987]
Abhd2	chr1	LDG_10min_LTP	116.63	127.575	15	14	1	1	1	1	0	0	0	0	abhydrolase domain containing 2, acylglycerol lipase [Source:RGD Symbol;Acc:1311389]
Abhd2	chr1	LDG_60min_LTP	97.89	96.1044	9	9	0	0	0	0	0	0	0	0	abhydrolase domain containing 2, acylglycerol lipase [Source:RGD Symbol;Acc:1311389]
Abhd2	chr1	RDG_10min_no_LTP	121.755	121.426	12	12	0	0	0	0	0	0	0	0	abhydrolase domain containing 2, acylglycerol lipase [Source:RGD Symbol;Acc:1311389]
Abhd2	chr1	RDG_60min_no_LTP	90.77	105.403	23	22	1	1	0	0	1	1	0	0	abhydrolase domain containing 2, acylglycerol lipase [Source:RGD Symbol;Acc:1311389]
Abhd3	chr18	LDG_10min_LTP	119.78	126.505	140	135	5	5	3	3	0	0	2	2	abhydrolase domain containing 3, phospholipase [Source:RGD Symbol;Acc:1310655]
Abhd3	chr18	LDG_60min_LTP	125.96	131.683	113	110	3	3	2	2	0	0	1	1	abhydrolase domain containing 3, phospholipase [Source:RGD Symbol;Acc:1310655]
Abhd3	chr18	RDG_10min_no_LTP	118.51	128.068	103	100	3	4	2	3	0	0	1	1	abhydrolase domain containing 3, phospholipase [Source:RGD Symbol;Acc:1310655]
Abhd3	chr18	RDG_60min_no_LTP	124	136.171	157	152	5	5	3	3	0	0	2	2	abhydrolase domain containing 3, phospholipase [Source:RGD Symbol;Acc:1310655]
Abhd4	chr15	LDG_10min_LTP	87.56	96.9457	122	111	11	15	4	4	4	4	4	7	abhydrolase domain containing 4, N-acyl phospholipase B [Source:RGD Symbol;Acc:1311858]
Abhd4	chr15	LDG_60min_LTP	98.75	101.135	86	79	7	10	1	1	3	5	3	4	abhydrolase domain containing 4, N-acyl phospholipase B [Source:RGD Symbol;Acc:1311858]
Abhd4	chr15	RDG_10min_no_LTP	96.46	102.309	97	88	9	11	1	1	5	7	3	3	abhydrolase domain containing 4, N-acyl phospholipase B [Source:RGD Symbol;Acc:1311858]
Abhd4	chr15	RDG_60min_no_LTP	90.98	100.834	110	102	8	9	2	2	5	5	2	2	abhydrolase domain containing 4, N-acyl phospholipase B [Source:RGD Symbol;Acc:1311858]
Abhd5	chr8	LDG_10min_LTP	145.51	155.467	18	18	0	0	0	0	0	0	0	0	abhydrolase domain containing 5, lysophosphatidic acid acyltransferase [Source:RGD Symbol;Acc:1303237]
Abhd5	chr8	LDG_60min_LTP	102.48	120.122	17	17	0	0	0	0	0	0	0	0	abhydrolase domain containing 5, lysophosphatidic acid acyltransferase [Source:RGD Symbol;Acc:1303237]
Abhd5	chr8	RDG_10min_no_LTP	110.73	106.961	17	17	0	0	0	0	0	0	0	0	abhydrolase domain containing 5, lysophosphatidic acid acyltransferase [Source:RGD Symbol;Acc:1303237]
Abhd5	chr8	RDG_60min_no_LTP	119.095	140.592	20	20	0	0	0	0	0	0	0	0	abhydrolase domain containing 5, lysophosphatidic acid acyltransferase [Source:RGD Symbol;Acc:1303237]
Abhd6	chr15	LDG_10min_LTP	101.42	121.326	107	100	7	8	1	1	4	4	3	3	abhydrolase domain containing 6, acylglycerol lipase [Source:RGD Symbol;Acc:1359323]
Abhd6	chr15	LDG_60min_LTP	107.79	120.194	51	49	2	2	0	0	1	1	1	1	abhydrolase domain containing 6, acylglycerol lipase [Source:RGD Symbol;Acc:1359323]
Abhd6	chr15	RDG_10min_no_LTP	119.28	130.854	105	94	11	11	2	2	2	2	7	7	abhydrolase domain containing 6, acylglycerol lipase [Source:RGD Symbol;Acc:1359323]
Abhd6	chr15	RDG_60min_no_LTP	120.69	126.353	115	103	12	15	4	4	1	2	8	9	abhydrolase domain containing 6, acylglycerol lipase [Source:RGD Symbol;Acc:1359323]
Abhd8	chr16	LDG_10min_LTP	85.19	92.7811	435	427	8	11	6	7	1	1	2	3	abhydrolase domain containing 8 [Source:RGD Symbol;Acc:1305693]
Abhd8	chr16	LDG_60min_LTP	83.93	94.752	375	361	14	16	10	10	3	4	2	2	abhydrolase domain containing 8 [Source:RGD Symbol;Acc:1305693]
Abhd8	chr16	RDG_10min_no_LTP	94.71	98.4436	379	371	8	9	5	5	1	1	2	3	abhydrolase domain containing 8 [Source:RGD Symbol;Acc:1305693]
Abhd8	chr16	RDG_60min_no_LTP	94.59	104.072	541	525	16	23	8	8	5	10	5	5	abhydrolase domain containing 8 [Source:RGD Symbol;Acc:1305693]
Abi1	chr17	LDG_10min_LTP	130.38	135.699	239	233	6	6	2	2	1	1	3	3	abl-interactor 1 [Source:RGD Symbol;Acc:621008]
Abi1	chr17	LDG_60min_LTP	151.77	152.869	210	204	6	6	4	4	1	1	1	1	abl-interactor 1 [Source:RGD Symbol;Acc:621008]
Abi1	chr17	RDG_10min_no_LTP	113.055	120.622	176	168	8	9	5	6	2	2	1	1	abl-interactor 1 [Source:RGD Symbol;Acc:621008]
Abi1	chr17	RDG_60min_no_LTP	108.71	125.432	282	276	6	8	3	3	2	4	1	1	abl-interactor 1 [Source:RGD Symbol;Acc:621008]
Abi2	chr9	LDG_10min_LTP	111.48	119.55	257	235	22	34	4	4	14	26	4	4	abl-interactor 2 [Source:RGD Symbol;Acc:628771]
Abi2	chr9	LDG_60min_LTP	92.085	105.141	226	199	27	44	3	3	23	39	2	2	abl-interactor 2 [Source:RGD Symbol;Acc:628771]
Abi2	chr9	RDG_10min_no_LTP	98.78	119.362	169	157	12	25	0	0	12	24	1	1	abl-interactor 2 [Source:RGD Symbol;Acc:628771]
Abi2	chr9	RDG_60min_no_LTP	99.48	120.564	279	261	18	26	4	4	10	16	5	6	abl-interactor 2 [Source:RGD Symbol;Acc:628771]
Abi3	chr10	LDG_60min_LTP	40.385	79.725	4	4	0	0	0	0	0	0	0	0	ABI family, member 3 [Source:RGD Symbol;Acc:1311794]
Abi3	chr10	RDG_10min_no_LTP	57.95	75.3225	4	4	0	0	0	0	0	0	0	0	ABI family, member 3 [Source:RGD Symbol;Acc:1311794]
Abi3	chr10	RDG_60min_no_LTP	148.87	144.678	5	5	0	0	0	0	0	0	0	0	ABI family, member 3 [Source:RGD Symbol;Acc:1311794]
Abi3bp	chr11	RDG_60min_no_LTP	33.04	33.04	2	2	0	0	0	0	0	0	0	0	ABI family member 3 binding protein [Source:RGD Symbol;Acc:1562717]
Abitram	chr5	LDG_10min_LTP	86.525	81.09	6	6	0	0	0	0	0	0	0	0	actin binding transcription modulator [Source:RGD Symbol;Acc:1594560]
Abitram	chr5	LDG_60min_LTP	59.52	100.745	6	5	1	1	0	0	1	1	0	0	actin binding transcription modulator [Source:RGD Symbol;Acc:1594560]
Abitram	chr5	RDG_10min_no_LTP	71	67.375	6	6	0	0	0	0	0	0	0	0	actin binding transcription modulator [Source:RGD Symbol;Acc:1594560]
Abitram	chr5	RDG_60min_no_LTP	165.97	142.812	13	13	0	0	0	0	0	0	0	0	actin binding transcription modulator [Source:RGD Symbol;Acc:1594560]
Abl1	chr3	LDG_10min_LTP	144.135	147.264	18	17	1	2	0	0	1	2	0	0	ABL proto-oncogene 1, non-receptor tyrosine kinase [Source:RGD Symbol;Acc:1584969]
Abl1	chr3	LDG_60min_LTP	153.535	154.381	22	19	3	3	2	2	0	0	1	1	ABL proto-oncogene 1, non-receptor tyrosine kinase [Source:RGD Symbol;Acc:1584969]
Abl1	chr3	RDG_10min_no_LTP	107.875	111.631	30	29	1	1	0	0	0	0	1	1	ABL proto-oncogene 1, non-receptor tyrosine kinase [Source:RGD Symbol;Acc:1584969]
Abl1	chr3	RDG_60min_no_LTP	125.815	137.208	32	32	0	0	0	0	0	0	0	0	ABL proto-oncogene 1, non-receptor tyrosine kinase [Source:RGD Symbol;Acc:1584969]
Abl2	chr13	LDG_10min_LTP	118.36	132.481	54	53	1	1	1	1	0	0	0	0	ABL proto-oncogene 2, non-receptor tyrosine kinase [Source:RGD Symbol;Acc:1590898]
Abl2	chr13	LDG_60min_LTP	172.29	166.559	51	51	0	0	0	0	0	0	0	0	ABL proto-oncogene 2, non-receptor tyrosine kinase [Source:RGD Symbol;Acc:1590898]
Abl2	chr13	RDG_10min_no_LTP	105.96	114.624	33	32	1	1	0	0	0	0	1	1	ABL proto-oncogene 2, non-receptor tyrosine kinase [Source:RGD Symbol;Acc:1590898]
Abl2	chr13	RDG_60min_no_LTP	92.805	118.897	56	55	1	1	0	0	0	0	1	1	ABL proto-oncogene 2, non-receptor tyrosine kinase [Source:RGD Symbol;Acc:1590898]
Ablim1	chr1	LDG_10min_LTP	107.45	120.533	65	62	3	3	1	1	0	0	2	2
Ablim1	chr1	LDG_60min_LTP	107.19	121.887	64	63	1	2	0	0	1	2	0	0
Ablim1	chr1	RDG_10min_no_LTP	114.62	127.874	57	55	2	3	2	3	0	0	0	0
Ablim1	chr1	RDG_60min_no_LTP	103.92	132.288	91	90	1	1	0	0	1	1	0	0
Ablim2	chr14	LDG_10min_LTP	90.765	107.128	72	70	2	2	0	0	2	2	0	0	actin binding LIM protein family, member 2 [Source:RGD Symbol;Acc:1303094]
Ablim2	chr14	LDG_60min_LTP	102.385	122.909	44	44	0	0	0	0	0	0	0	0	actin binding LIM protein family, member 2 [Source:RGD Symbol;Acc:1303094]
Ablim2	chr14	RDG_10min_no_LTP	130.31	127.325	49	47	2	2	0	0	2	2	0	0	actin binding LIM protein family, member 2 [Source:RGD Symbol;Acc:1303094]
Ablim2	chr14	RDG_60min_no_LTP	97.4	124.008	73	70	3	4	1	1	1	1	1	2	actin binding LIM protein family, member 2 [Source:RGD Symbol;Acc:1303094]
Ablim3	chr18	LDG_10min_LTP	96.59	104.843	42	41	1	1	0	0	0	0	1	1	actin binding LIM protein family, member 3 [Source:RGD Symbol;Acc:1565118]
Ablim3	chr18	LDG_60min_LTP	87.46	100.94	33	31	2	2	0	0	0	0	2	2	actin binding LIM protein family, member 3 [Source:RGD Symbol;Acc:1565118]
Ablim3	chr18	RDG_10min_no_LTP	125.14	120.949	31	30	1	5	1	2	1	3	0	0	actin binding LIM protein family, member 3 [Source:RGD Symbol;Acc:1565118]
Ablim3	chr18	RDG_60min_no_LTP	101.46	112.133	57	56	1	1	0	0	1	1	0	0	actin binding LIM protein family, member 3 [Source:RGD Symbol;Acc:1565118]
Abo	chr3	LDG_10min_LTP	43.46	70.3137	8	8	0	0	0	0	0	0	0	0	ABO, alpha 1-3-N-acetylgalactosaminyltransferase and alpha 1-3-galactosyltransferase [Source:RGD Symbol;Acc:2307241]
Abo	chr3	LDG_60min_LTP	133.73	133.73	1	1	0	0	0	0	0	0	0	0	ABO, alpha 1-3-N-acetylgalactosaminyltransferase and alpha 1-3-galactosyltransferase [Source:RGD Symbol;Acc:2307241]
Abo	chr3	RDG_10min_no_LTP	73.34	84.2075	4	4	0	0	0	0	0	0	0	0	ABO, alpha 1-3-N-acetylgalactosaminyltransferase and alpha 1-3-galactosyltransferase [Source:RGD Symbol;Acc:2307241]
Abo	chr3	RDG_60min_no_LTP	71.04	91.46	5	4	1	1	0	0	0	0	1	1	ABO, alpha 1-3-N-acetylgalactosaminyltransferase and alpha 1-3-galactosyltransferase [Source:RGD Symbol;Acc:2307241]
Abr	chr10	LDG_10min_LTP	115.58	121.281	660	639	21	23	10	12	10	10	1	1	ABR activator of RhoGEF and GTPase [Source:RGD Symbol;Acc:1306279]
Abr	chr10	LDG_60min_LTP	102.29	121.669	597	582	15	17	6	6	8	10	1	1	ABR activator of RhoGEF and GTPase [Source:RGD Symbol;Acc:1306279]
Abr	chr10	RDG_10min_no_LTP	104.05	111.715	470	462	8	8	3	3	4	4	1	1	ABR activator of RhoGEF and GTPase [Source:RGD Symbol;Acc:1306279]
Abr	chr10	RDG_60min_no_LTP	109.71	118.163	697	673	24	24	13	13	6	6	5	5	ABR activator of RhoGEF and GTPase [Source:RGD Symbol;Acc:1306279]
Abra	chr7	LDG_10min_LTP	214	214	1	0	1	1	0	0	1	1	0	0	actin-binding Rho activating protein [Source:RGD Symbol;Acc:708493]
Abra	chr7	LDG_60min_LTP	48.3	48.3	1	1	0	0	0	0	0	0	0	0	actin-binding Rho activating protein [Source:RGD Symbol;Acc:708493]
Abracl	chr1	LDG_10min_LTP	92.8	103.355	55	52	3	3	3	3	0	0	0	0	ABRA C-terminal like [Source:RGD Symbol;Acc:1583256]
Abracl	chr1	LDG_60min_LTP	84.8	102.4	45	43	2	2	0	0	0	0	2	2	ABRA C-terminal like [Source:RGD Symbol;Acc:1583256]
Abracl	chr1	RDG_10min_no_LTP	88.835	104.157	50	49	1	1	0	0	1	1	0	0	ABRA C-terminal like [Source:RGD Symbol;Acc:1583256]
Abracl	chr1	RDG_60min_no_LTP	86.89	101.341	67	65	2	2	1	1	1	1	0	0	ABRA C-terminal like [Source:RGD Symbol;Acc:1583256]
Abraxas1	chr14	LDG_10min_LTP	210.12	210.12	2	2	0	0	0	0	0	0	0	0	abraxas 1, BRCA1 A complex subunit [Source:RGD Symbol;Acc:1305287]
Abraxas1	chr14	RDG_10min_no_LTP	25.56	25.56	2	2	0	0	0	0	0	0	0	0	abraxas 1, BRCA1 A complex subunit [Source:RGD Symbol;Acc:1305287]
Abraxas1	chr14	RDG_60min_no_LTP	157.48	186.634	5	5	0	0	0	0	0	0	0	0	abraxas 1, BRCA1 A complex subunit [Source:RGD Symbol;Acc:1305287]
Abraxas2	chr1	LDG_10min_LTP	84.21	109.482	35	34	1	1	0	0	0	0	1	1	abraxas 2, BRISC complex subunit [Source:RGD Symbol;Acc:1308918]
Abraxas2	chr1	LDG_60min_LTP	105.445	128.442	22	21	1	1	1	1	0	0	0	0	abraxas 2, BRISC complex subunit [Source:RGD Symbol;Acc:1308918]
Abraxas2	chr1	RDG_10min_no_LTP	86.76	113.564	17	17	0	0	0	0	0	0	0	0	abraxas 2, BRISC complex subunit [Source:RGD Symbol;Acc:1308918]
Abraxas2	chr1	RDG_60min_no_LTP	121.245	119.944	32	32	0	0	0	0	0	0	0	0	abraxas 2, BRISC complex subunit [Source:RGD Symbol;Acc:1308918]
Abt1	chr17	LDG_10min_LTP	88.26	101.137	38	38	0	0	0	0	0	0	0	0	activator of basal transcription 1 [Source:RGD Symbol;Acc:1310785]
Abt1	chr17	LDG_60min_LTP	148.905	142.053	32	30	2	2	2	2	0	0	0	0	activator of basal transcription 1 [Source:RGD Symbol;Acc:1310785]
Abt1	chr17	RDG_10min_no_LTP	100	105.227	39	39	0	0	0	0	0	0	0	0	activator of basal transcription 1 [Source:RGD Symbol;Acc:1310785]
Abt1	chr17	RDG_60min_no_LTP	98.95	102.756	42	42	0	0	0	0	0	0	0	0	activator of basal transcription 1 [Source:RGD Symbol;Acc:1310785]
Abtb1	chr4	LDG_10min_LTP	139.93	146.381	23	22	1	1	1	1	0	0	0	0	ankyrin repeat and BTB domain containing 1 [Source:RGD Symbol;Acc:1359363]
Abtb1	chr4	LDG_60min_LTP	108.53	115.829	23	23	0	0	0	0	0	0	0	0	ankyrin repeat and BTB domain containing 1 [Source:RGD Symbol;Acc:1359363]
Abtb1	chr4	RDG_10min_no_LTP	152.36	155.945	15	14	1	1	0	0	1	1	0	0	ankyrin repeat and BTB domain containing 1 [Source:RGD Symbol;Acc:1359363]
Abtb1	chr4	RDG_60min_no_LTP	159.05	165.94	36	36	0	0	0	0	0	0	0	0	ankyrin repeat and BTB domain containing 1 [Source:RGD Symbol;Acc:1359363]
Abtb2	chr3	LDG_10min_LTP	110.31	119.901	10	10	0	0	0	0	0	0	0	0	ankyrin repeat and BTB domain containing 2 [Source:RGD Symbol;Acc:620724]
Abtb2	chr3	LDG_60min_LTP	127.35	140.097	9	8	1	2	0	0	1	2	0	0	ankyrin repeat and BTB domain containing 2 [Source:RGD Symbol;Acc:620724]
Abtb2	chr3	RDG_10min_no_LTP	111.07	159.654	5	5	0	0	0	0	0	0	0	0	ankyrin repeat and BTB domain containing 2 [Source:RGD Symbol;Acc:620724]
Abtb2	chr3	RDG_60min_no_LTP	194.96	184.441	10	10	0	0	0	0	0	0	0	0	ankyrin repeat and BTB domain containing 2 [Source:RGD Symbol;Acc:620724]
Acaa1a	chr8	LDG_10min_LTP	94.7	104.08	63	61	2	2	0	0	0	0	2	2	acetyl-CoA acyltransferase 1A [Source:RGD Symbol;Acc:67379]
Acaa1a	chr8	LDG_60min_LTP	99.715	110.934	62	58	4	5	2	2	2	3	0	0	acetyl-CoA acyltransferase 1A [Source:RGD Symbol;Acc:67379]
Acaa1a	chr8	RDG_10min_no_LTP	80.78	102.507	65	65	0	0	0	0	0	0	0	0	acetyl-CoA acyltransferase 1A [Source:RGD Symbol;Acc:67379]
Acaa1a	chr8	RDG_60min_no_LTP	103.97	119.198	75	75	0	0	0	0	0	0	0	0	acetyl-CoA acyltransferase 1A [Source:RGD Symbol;Acc:67379]
Acaa1b	chr8	LDG_10min_LTP	121.43	118.567	8	8	0	0	0	0	0	0	0	0	acetyl-Coenzyme A acyltransferase 1B [Source:RGD Symbol;Acc:1562373]
Acaa1b	chr8	LDG_60min_LTP	127.1	127.1	2	2	0	0	0	0	0	0	0	0	acetyl-Coenzyme A acyltransferase 1B [Source:RGD Symbol;Acc:1562373]
Acaa1b	chr8	RDG_10min_no_LTP	97.04	94.4067	3	3	0	0	0	0	0	0	0	0	acetyl-Coenzyme A acyltransferase 1B [Source:RGD Symbol;Acc:1562373]
Acaa1b	chr8	RDG_60min_no_LTP	166.33	170.637	4	4	0	0	0	0	0	0	0	0	acetyl-Coenzyme A acyltransferase 1B [Source:RGD Symbol;Acc:1562373]
Acaa2	chr18	LDG_10min_LTP	91.15	103.071	19	17	2	2	1	1	0	0	1	1	acetyl-CoA acyltransferase 2 [Source:RGD Symbol;Acc:620482]
Acaa2	chr18	LDG_60min_LTP	79.045	80.8293	14	14	0	0	0	0	0	0	0	0	acetyl-CoA acyltransferase 2 [Source:RGD Symbol;Acc:620482]
Acaa2	chr18	RDG_10min_no_LTP	76.65	89.4927	11	11	0	0	0	0	0	0	0	0	acetyl-CoA acyltransferase 2 [Source:RGD Symbol;Acc:620482]
Acaa2	chr18	RDG_60min_no_LTP	84.48	101.643	31	31	0	0	0	0	0	0	0	0	acetyl-CoA acyltransferase 2 [Source:RGD Symbol;Acc:620482]
Acaca	chr10	LDG_10min_LTP	118.91	129.132	61	60	1	2	0	0	1	2	0	0	acetyl-CoA carboxylase alpha [Source:RGD Symbol;Acc:621248]
Acaca	chr10	LDG_60min_LTP	137.6	136.813	51	51	0	0	0	0	0	0	0	0	acetyl-CoA carboxylase alpha [Source:RGD Symbol;Acc:621248]
Acaca	chr10	RDG_10min_no_LTP	123.9	133.992	40	40	0	0	0	0	0	0	0	0	acetyl-CoA carboxylase alpha [Source:RGD Symbol;Acc:621248]
Acaca	chr10	RDG_60min_no_LTP	116.75	128.512	75	74	1	1	1	1	0	0	0	0	acetyl-CoA carboxylase alpha [Source:RGD Symbol;Acc:621248]
Acacb	chr12	LDG_10min_LTP	168.41	202.338	4	4	0	0	0	0	0	0	0	0	acetyl-CoA carboxylase beta [Source:RGD Symbol;Acc:620500]
Acacb	chr12	LDG_60min_LTP	196.82	184.12	4	3	1	1	0	0	1	1	0	0	acetyl-CoA carboxylase beta [Source:RGD Symbol;Acc:620500]
Acacb	chr12	RDG_60min_no_LTP	183.62	183.533	3	3	0	0	0	0	0	0	0	0	acetyl-CoA carboxylase beta [Source:RGD Symbol;Acc:620500]
Acad10	chr12	LDG_10min_LTP	66.36	84.7812	8	8	0	0	0	0	0	0	0	0
Acad10	chr12	LDG_60min_LTP	123.085	108.34	4	4	0	0	0	0	0	0	0	0
Acad10	chr12	RDG_10min_no_LTP	144.28	186.917	9	7	2	2	0	0	2	2	0	0
Acad10	chr12	RDG_60min_no_LTP	158.395	186.352	6	6	0	0	0	0	0	0	0	0
Acad11	chr8	LDG_10min_LTP	136.17	135.245	13	11	2	2	0	0	1	1	1	1	acyl-CoA dehydrogenase family, member 11 [Source:RGD Symbol;Acc:1306270]
Acad11	chr8	LDG_60min_LTP	151.22	153.812	11	11	0	0	0	0	0	0	0	0	acyl-CoA dehydrogenase family, member 11 [Source:RGD Symbol;Acc:1306270]
Acad11	chr8	RDG_10min_no_LTP	126.45	140.247	12	12	0	0	0	0	0	0	0	0	acyl-CoA dehydrogenase family, member 11 [Source:RGD Symbol;Acc:1306270]
Acad11	chr8	RDG_60min_no_LTP	150.105	158.355	20	20	0	0	0	0	0	0	0	0	acyl-CoA dehydrogenase family, member 11 [Source:RGD Symbol;Acc:1306270]
Acad8	chr8	LDG_10min_LTP	125.615	147.394	44	43	1	1	0	0	0	0	1	1	acyl-CoA dehydrogenase family, member 8 [Source:RGD Symbol;Acc:1564209]
Acad8	chr8	LDG_60min_LTP	120.28	133.566	29	29	0	0	0	0	0	0	0	0	acyl-CoA dehydrogenase family, member 8 [Source:RGD Symbol;Acc:1564209]
Acad8	chr8	RDG_10min_no_LTP	160.87	191.917	37	36	1	1	1	1	0	0	0	0	acyl-CoA dehydrogenase family, member 8 [Source:RGD Symbol;Acc:1564209]
Acad8	chr8	RDG_60min_no_LTP	163.31	175.009	55	52	3	3	1	1	1	1	1	1	acyl-CoA dehydrogenase family, member 8 [Source:RGD Symbol;Acc:1564209]
Acad9	chr2	LDG_10min_LTP	124	118.519	49	48	1	1	0	0	1	1	0	0	acyl-CoA dehydrogenase family, member 9 [Source:RGD Symbol;Acc:727973]
Acad9	chr2	LDG_60min_LTP	107.62	124.782	58	51	7	8	2	2	2	3	3	3	acyl-CoA dehydrogenase family, member 9 [Source:RGD Symbol;Acc:727973]
Acad9	chr2	RDG_10min_no_LTP	105.22	111.611	46	42	4	4	4	4	0	0	0	0	acyl-CoA dehydrogenase family, member 9 [Source:RGD Symbol;Acc:727973]
Acad9	chr2	RDG_60min_no_LTP	115.725	122.193	76	75	1	1	0	0	1	1	0	0	acyl-CoA dehydrogenase family, member 9 [Source:RGD Symbol;Acc:727973]
Acadl	chr9	LDG_10min_LTP	118.09	122.863	41	41	0	0	0	0	0	0	0	0	acyl-CoA dehydrogenase, long chain [Source:RGD Symbol;Acc:2011]
Acadl	chr9	LDG_60min_LTP	96.63	100.293	36	35	1	1	1	1	0	0	0	0	acyl-CoA dehydrogenase, long chain [Source:RGD Symbol;Acc:2011]
Acadl	chr9	RDG_10min_no_LTP	100.675	107.096	32	31	1	1	1	1	0	0	0	0	acyl-CoA dehydrogenase, long chain [Source:RGD Symbol;Acc:2011]
Acadl	chr9	RDG_60min_no_LTP	127.56	131.338	44	41	3	5	1	1	2	3	1	1	acyl-CoA dehydrogenase, long chain [Source:RGD Symbol;Acc:2011]
Acadm	chr2	LDG_10min_LTP	132.04	121.344	36	36	0	0	0	0	0	0	0	0	acyl-CoA dehydrogenase medium chain [Source:RGD Symbol;Acc:2012]
Acadm	chr2	LDG_60min_LTP	142.15	151.663	16	15	1	1	1	1	0	0	0	0	acyl-CoA dehydrogenase medium chain [Source:RGD Symbol;Acc:2012]
Acadm	chr2	RDG_10min_no_LTP	100.04	111.14	31	31	0	0	0	0	0	0	0	0	acyl-CoA dehydrogenase medium chain [Source:RGD Symbol;Acc:2012]
Acadm	chr2	RDG_60min_no_LTP	117.24	119.81	30	28	2	2	1	1	0	0	1	1	acyl-CoA dehydrogenase medium chain [Source:RGD Symbol;Acc:2012]
Acads	chr12	LDG_10min_LTP	116.39	119.753	23	22	1	1	1	1	0	0	0	0	acyl-CoA dehydrogenase short chain [Source:RGD Symbol;Acc:620514]
Acads	chr12	LDG_60min_LTP	120.495	120.713	18	18	0	0	0	0	0	0	0	0	acyl-CoA dehydrogenase short chain [Source:RGD Symbol;Acc:620514]
Acads	chr12	RDG_10min_no_LTP	110.3	108.946	23	22	1	1	0	0	0	0	1	1	acyl-CoA dehydrogenase short chain [Source:RGD Symbol;Acc:620514]
Acads	chr12	RDG_60min_no_LTP	113.29	133.332	29	27	2	2	1	1	1	1	0	0	acyl-CoA dehydrogenase short chain [Source:RGD Symbol;Acc:620514]
Acadsb	chr1	LDG_10min_LTP	119.92	163.919	21	21	0	0	0	0	0	0	0	0	acyl-CoA dehydrogenase, short/branched chain [Source:RGD Symbol;Acc:2013]
Acadsb	chr1	LDG_60min_LTP	258.185	238.267	10	9	1	1	1	1	0	0	0	0	acyl-CoA dehydrogenase, short/branched chain [Source:RGD Symbol;Acc:2013]
Acadsb	chr1	RDG_10min_no_LTP	145.11	152.676	9	9	0	0	0	0	0	0	0	0	acyl-CoA dehydrogenase, short/branched chain [Source:RGD Symbol;Acc:2013]
Acadsb	chr1	RDG_60min_no_LTP	192.15	189.446	18	17	1	1	1	1	0	0	0	0	acyl-CoA dehydrogenase, short/branched chain [Source:RGD Symbol;Acc:2013]
Acadvl	chr10	LDG_10min_LTP	113.39	119.229	57	54	3	3	1	1	2	2	0	0	acyl-CoA dehydrogenase, very long chain [Source:RGD Symbol;Acc:2014]
Acadvl	chr10	LDG_60min_LTP	113.44	124.591	55	52	3	3	3	3	0	0	0	0	acyl-CoA dehydrogenase, very long chain [Source:RGD Symbol;Acc:2014]
Acadvl	chr10	RDG_10min_no_LTP	111.85	114.961	51	48	3	3	2	2	1	1	0	0	acyl-CoA dehydrogenase, very long chain [Source:RGD Symbol;Acc:2014]
Acadvl	chr10	RDG_60min_no_LTP	119.76	133.07	65	62	3	3	1	1	1	1	1	1	acyl-CoA dehydrogenase, very long chain [Source:RGD Symbol;Acc:2014]
Acan	chr1	LDG_10min_LTP	128.75	138.506	12	10	2	2	0	0	2	2	0	0	aggrecan [Source:RGD Symbol;Acc:68358]
Acan	chr1	LDG_60min_LTP	135.15	150.161	11	11	0	0	0	0	0	0	0	0	aggrecan [Source:RGD Symbol;Acc:68358]
Acan	chr1	RDG_10min_no_LTP	50.63	58.7633	6	5	1	1	0	0	1	1	0	0	aggrecan [Source:RGD Symbol;Acc:68358]
Acan	chr1	RDG_60min_no_LTP	64.11	76.955	8	7	1	1	0	0	1	1	0	0	aggrecan [Source:RGD Symbol;Acc:68358]
Acap1	chr10	RDG_60min_no_LTP	12.79	12.79	1	1	0	0	0	0	0	0	0	0	ArfGAP with coiled-coil, ankyrin repeat and PH domains 1 [Source:RGD Symbol;Acc:1305360]
Acap2	chr11	LDG_10min_LTP	135.77	148.998	97	94	3	3	1	1	2	2	0	0	ArfGAP with coiled-coil, ankyrin repeat and PH domains 2 [Source:RGD Symbol;Acc:1562939]
Acap2	chr11	LDG_60min_LTP	190.54	190.196	107	101	6	7	2	3	1	1	3	3	ArfGAP with coiled-coil, ankyrin repeat and PH domains 2 [Source:RGD Symbol;Acc:1562939]
Acap2	chr11	RDG_10min_no_LTP	149.785	161.668	64	63	1	1	0	0	0	0	1	1	ArfGAP with coiled-coil, ankyrin repeat and PH domains 2 [Source:RGD Symbol;Acc:1562939]
Acap2	chr11	RDG_60min_no_LTP	160.39	161.833	81	77	4	5	0	0	2	2	3	3	ArfGAP with coiled-coil, ankyrin repeat and PH domains 2 [Source:RGD Symbol;Acc:1562939]
Acap3	chr5	LDG_10min_LTP	121.77	138.165	85	82	3	3	1	1	1	1	1	1	ArfGAP with coiled-coil, ankyrin repeat and PH domains 3 [Source:RGD Symbol;Acc:1310711]
Acap3	chr5	LDG_60min_LTP	113.76	128.107	90	85	5	5	2	2	3	3	0	0	ArfGAP with coiled-coil, ankyrin repeat and PH domains 3 [Source:RGD Symbol;Acc:1310711]
Acap3	chr5	RDG_10min_no_LTP	122.56	135.197	88	82	6	7	2	2	3	3	2	2	ArfGAP with coiled-coil, ankyrin repeat and PH domains 3 [Source:RGD Symbol;Acc:1310711]
Acap3	chr5	RDG_60min_no_LTP	141.19	142.007	101	95	6	6	1	1	1	1	4	4	ArfGAP with coiled-coil, ankyrin repeat and PH domains 3 [Source:RGD Symbol;Acc:1310711]
Acat1	chr8	LDG_10min_LTP	108.55	110.91	160	157	3	3	1	1	2	2	0	0	acetyl-CoA acetyltransferase 1 [Source:RGD Symbol;Acc:2016]
Acat1	chr8	LDG_60min_LTP	84.11	105.258	119	114	5	6	1	1	1	1	4	4	acetyl-CoA acetyltransferase 1 [Source:RGD Symbol;Acc:2016]
Acat1	chr8	RDG_10min_no_LTP	117.58	127.892	125	117	8	8	3	3	3	3	2	2	acetyl-CoA acetyltransferase 1 [Source:RGD Symbol;Acc:2016]
Acat1	chr8	RDG_60min_no_LTP	121.27	135.769	181	177	4	5	2	3	0	0	2	2	acetyl-CoA acetyltransferase 1 [Source:RGD Symbol;Acc:2016]
Acat2	chr1	LDG_10min_LTP	117.72	126.503	120	115	5	5	2	2	1	1	2	2	acetyl-CoA acetyltransferase 2 [Source:RGD Symbol;Acc:1359366]
Acat2	chr1	LDG_60min_LTP	120.04	125.675	95	92	3	3	1	1	0	0	2	2	acetyl-CoA acetyltransferase 2 [Source:RGD Symbol;Acc:1359366]
Acat2	chr1	RDG_10min_no_LTP	126.78	125.18	70	66	4	4	1	1	1	1	2	2	acetyl-CoA acetyltransferase 2 [Source:RGD Symbol;Acc:1359366]
Acat2	chr1	RDG_60min_no_LTP	128.37	135.918	129	127	2	2	1	1	0	0	1	1	acetyl-CoA acetyltransferase 2 [Source:RGD Symbol;Acc:1359366]
Acat2l1	chr1	LDG_10min_LTP	68.5	75.4133	3	3	0	0	0	0	0	0	0	0	acetyl-CoA acetyltransferase 2-like 1 [Source:RGD Symbol;Acc:1562948]
Acat2l1	chr1	LDG_60min_LTP	84.36	91.195	4	3	1	1	0	0	1	1	0	0	acetyl-CoA acetyltransferase 2-like 1 [Source:RGD Symbol;Acc:1562948]
Acat2l1	chr1	RDG_10min_no_LTP	54.81	54.81	2	2	0	0	0	0	0	0	0	0	acetyl-CoA acetyltransferase 2-like 1 [Source:RGD Symbol;Acc:1562948]
Acat2l1	chr1	RDG_60min_no_LTP	129.11	168.613	3	3	0	0	0	0	0	0	0	0	acetyl-CoA acetyltransferase 2-like 1 [Source:RGD Symbol;Acc:1562948]
Acbd3	chr13	LDG_10min_LTP	136	137.527	32	32	0	0	0	0	0	0	0	0	acyl-CoA binding domain containing 3 [Source:RGD Symbol;Acc:727851]
Acbd3	chr13	LDG_60min_LTP	90.805	109.764	18	18	0	0	0	0	0	0	0	0	acyl-CoA binding domain containing 3 [Source:RGD Symbol;Acc:727851]
Acbd3	chr13	RDG_10min_no_LTP	120.17	115.199	25	25	0	0	0	0	0	0	0	0	acyl-CoA binding domain containing 3 [Source:RGD Symbol;Acc:727851]
Acbd3	chr13	RDG_60min_no_LTP	159.78	146.168	39	37	2	2	0	0	0	0	2	2	acyl-CoA binding domain containing 3 [Source:RGD Symbol;Acc:727851]
Acbd4	chr10	LDG_10min_LTP	96.5	111.776	89	85	4	4	1	1	1	1	2	2	acyl-CoA binding domain containing 4 [Source:RGD Symbol;Acc:1308404]
Acbd4	chr10	LDG_60min_LTP	85.765	99.6508	62	61	1	2	1	1	0	0	1	1	acyl-CoA binding domain containing 4 [Source:RGD Symbol;Acc:1308404]
Acbd4	chr10	RDG_10min_no_LTP	91.93	101.388	61	58	3	3	1	1	1	1	1	1	acyl-CoA binding domain containing 4 [Source:RGD Symbol;Acc:1308404]
Acbd4	chr10	RDG_60min_no_LTP	89.84	107.831	96	93	3	6	3	4	0	0	2	2	acyl-CoA binding domain containing 4 [Source:RGD Symbol;Acc:1308404]
Acbd5	chr17	LDG_10min_LTP	152.71	147.267	63	62	1	1	0	0	0	0	1	1	acyl-CoA binding domain containing 5 [Source:RGD Symbol;Acc:1309411]
Acbd5	chr17	LDG_60min_LTP	117.175	130.357	58	57	1	1	0	0	1	1	0	0	acyl-CoA binding domain containing 5 [Source:RGD Symbol;Acc:1309411]
Acbd5	chr17	RDG_10min_no_LTP	125.315	138.156	52	50	2	2	0	0	0	0	2	2	acyl-CoA binding domain containing 5 [Source:RGD Symbol;Acc:1309411]
Acbd5	chr17	RDG_60min_no_LTP	121.15	137.533	67	62	5	5	2	2	2	2	1	1	acyl-CoA binding domain containing 5 [Source:RGD Symbol;Acc:1309411]
Acbd6	chr13	LDG_10min_LTP	95.525	108.555	100	98	2	3	0	0	2	3	0	0	acyl-CoA binding domain containing 6 [Source:RGD Symbol;Acc:1305030]
Acbd6	chr13	LDG_60min_LTP	82.64	97.7242	71	70	1	1	0	0	1	1	0	0	acyl-CoA binding domain containing 6 [Source:RGD Symbol;Acc:1305030]
Acbd6	chr13	RDG_10min_no_LTP	104.9	109.908	47	46	1	1	0	0	0	0	1	1	acyl-CoA binding domain containing 6 [Source:RGD Symbol;Acc:1305030]
Acbd6	chr13	RDG_60min_no_LTP	124.13	130.705	104	99	5	5	0	0	3	3	2	2	acyl-CoA binding domain containing 6 [Source:RGD Symbol;Acc:1305030]
Acbd7	chr17	LDG_10min_LTP	113.345	113.345	2	2	0	0	0	0	0	0	0	0	acyl-CoA binding domain containing 7 [Source:RGD Symbol;Acc:1564164]
Acbd7	chr17	LDG_60min_LTP	83.64	83.64	1	1	0	0	0	0	0	0	0	0	acyl-CoA binding domain containing 7 [Source:RGD Symbol;Acc:1564164]
Accs	chr3	LDG_60min_LTP	119.96	119.96	2	2	0	0	0	0	0	0	0	0	1-aminocyclopropane-1-carboxylate synthase [Source:RGD Symbol;Acc:1309314]
Accs	chr3	RDG_10min_no_LTP	43.945	43.945	2	2	0	0	0	0	0	0	0	0	1-aminocyclopropane-1-carboxylate synthase [Source:RGD Symbol;Acc:1309314]
Accs	chr3	RDG_60min_no_LTP	112.9	130.02	5	4	1	1	0	0	1	1	0	0	1-aminocyclopropane-1-carboxylate synthase [Source:RGD Symbol;Acc:1309314]
Accsl	chr3	LDG_60min_LTP	231.12	231.12	1	1	0	0	0	0	0	0	0	0	1-aminocyclopropane-1-carboxylate synthase-like [Source:RGD Symbol;Acc:1596039]
Acd	chr19	LDG_10min_LTP	196.37	208.849	40	37	3	4	0	0	2	3	1	1	ACD, shelterin complex subunit and telomerase recruitment factor [Source:RGD Symbol;Acc:1565053]
Acd	chr19	LDG_60min_LTP	171.81	184.618	32	29	3	3	0	0	2	2	1	1	ACD, shelterin complex subunit and telomerase recruitment factor [Source:RGD Symbol;Acc:1565053]
Acd	chr19	RDG_10min_no_LTP	140.36	157.405	31	31	0	0	0	0	0	0	0	0	ACD, shelterin complex subunit and telomerase recruitment factor [Source:RGD Symbol;Acc:1565053]
Acd	chr19	RDG_60min_no_LTP	143.37	166.551	40	39	1	2	1	1	0	0	1	1	ACD, shelterin complex subunit and telomerase recruitment factor [Source:RGD Symbol;Acc:1565053]
Ace	chr10	LDG_10min_LTP	137.01	129.46	10	8	2	3	0	0	2	3	0	0	angiotensin I converting enzyme [Source:RGD Symbol;Acc:2493]
Ace	chr10	LDG_60min_LTP	70.41	116.502	5	5	0	0	0	0	0	0	0	0	angiotensin I converting enzyme [Source:RGD Symbol;Acc:2493]
Ace	chr10	RDG_10min_no_LTP	61.355	81.77	8	8	0	0	0	0	0	0	0	0	angiotensin I converting enzyme [Source:RGD Symbol;Acc:2493]
Ace	chr10	RDG_60min_no_LTP	66.26	99.5967	9	9	0	0	0	0	0	0	0	0	angiotensin I converting enzyme [Source:RGD Symbol;Acc:2493]
Ace2	chrX	LDG_10min_LTP	145.5	132.92	3	3	0	0	0	0	0	0	0	0	angiotensin I converting enzyme 2 [Source:RGD Symbol;Acc:728890]
Ace2	chrX	LDG_60min_LTP	180.71	180.71	1	1	0	0	0	0	0	0	0	0	angiotensin I converting enzyme 2 [Source:RGD Symbol;Acc:728890]
Ace2	chrX	RDG_10min_no_LTP	57.81	57.81	1	1	0	0	0	0	0	0	0	0	angiotensin I converting enzyme 2 [Source:RGD Symbol;Acc:728890]
Ace2	chrX	RDG_60min_no_LTP	95.51	129.917	4	4	0	0	0	0	0	0	0	0	angiotensin I converting enzyme 2 [Source:RGD Symbol;Acc:728890]
Acer2	chr5	LDG_10min_LTP	88.66	112.458	13	13	0	0	0	0	0	0	0	0	alkaline ceramidase 2 [Source:RGD Symbol;Acc:1304629]
Acer2	chr5	LDG_60min_LTP	122.37	124.936	19	17	2	2	0	0	0	0	2	2	alkaline ceramidase 2 [Source:RGD Symbol;Acc:1304629]
Acer2	chr5	RDG_10min_no_LTP	131.62	120.455	23	21	2	2	2	2	0	0	0	0	alkaline ceramidase 2 [Source:RGD Symbol;Acc:1304629]
Acer2	chr5	RDG_60min_no_LTP	173.17	149.596	16	15	1	1	0	0	0	0	1	1	alkaline ceramidase 2 [Source:RGD Symbol;Acc:1304629]
Acer3	chr1	LDG_10min_LTP	56.81	77.3604	23	23	0	0	0	0	0	0	0	0	alkaline ceramidase 3 [Source:RGD Symbol;Acc:1561254]
Acer3	chr1	LDG_60min_LTP	138.49	147.099	16	16	0	0	0	0	0	0	0	0	alkaline ceramidase 3 [Source:RGD Symbol;Acc:1561254]
Acer3	chr1	RDG_10min_no_LTP	124.29	119.229	23	23	0	0	0	0	0	0	0	0	alkaline ceramidase 3 [Source:RGD Symbol;Acc:1561254]
Acer3	chr1	RDG_60min_no_LTP	68.07	89.2004	25	25	0	0	0	0	0	0	0	0	alkaline ceramidase 3 [Source:RGD Symbol;Acc:1561254]
Ache	chr12	LDG_10min_LTP	117.96	127.914	81	77	4	4	2	2	1	1	1	1	acetylcholinesterase [Source:RGD Symbol;Acc:69313]
Ache	chr12	LDG_60min_LTP	114.89	119.858	59	56	3	4	0	0	2	3	1	1	acetylcholinesterase [Source:RGD Symbol;Acc:69313]
Ache	chr12	RDG_10min_no_LTP	118.5	135.493	57	56	1	2	1	2	0	0	0	0	acetylcholinesterase [Source:RGD Symbol;Acc:69313]
Ache	chr12	RDG_60min_no_LTP	132.45	131.878	76	73	3	3	2	2	1	1	0	0	acetylcholinesterase [Source:RGD Symbol;Acc:69313]
Acin1	chr15	LDG_10min_LTP	125.095	135.232	50	49	1	1	0	0	0	0	1	1	apoptotic chromatin condensation inducer 1 [Source:RGD Symbol;Acc:1311945]
Acin1	chr15	LDG_60min_LTP	183.85	171.421	55	51	4	4	2	2	2	2	0	0	apoptotic chromatin condensation inducer 1 [Source:RGD Symbol;Acc:1311945]
Acin1	chr15	RDG_10min_no_LTP	128.33	139.042	47	45	2	2	1	1	0	0	1	1	apoptotic chromatin condensation inducer 1 [Source:RGD Symbol;Acc:1311945]
Acin1	chr15	RDG_60min_no_LTP	148.345	150.712	92	90	2	3	1	1	1	1	1	1	apoptotic chromatin condensation inducer 1 [Source:RGD Symbol;Acc:1311945]
Ackr1	chr13	LDG_10min_LTP	125.77	127.807	265	254	11	12	5	5	4	5	2	2	atypical chemokine receptor 1 [Source:RGD Symbol;Acc:1596198]
Ackr1	chr13	LDG_60min_LTP	120	125.946	265	259	6	8	2	2	2	4	2	2	atypical chemokine receptor 1 [Source:RGD Symbol;Acc:1596198]
Ackr1	chr13	RDG_10min_no_LTP	114.52	125.463	195	182	13	15	4	4	5	6	4	5	atypical chemokine receptor 1 [Source:RGD Symbol;Acc:1596198]
Ackr1	chr13	RDG_60min_no_LTP	121.7	130.832	293	279	14	16	6	6	4	5	4	5	atypical chemokine receptor 1 [Source:RGD Symbol;Acc:1596198]
Ackr2	chr8	LDG_10min_LTP	59.76	59.76	2	1	1	1	0	0	0	0	1	1	atypical chemokine receptor 2 [Source:RGD Symbol;Acc:620323]
Ackr2	chr8	RDG_60min_no_LTP	37.68	68.55	3	3	0	0	0	0	0	0	0	0	atypical chemokine receptor 2 [Source:RGD Symbol;Acc:620323]
Ackr3	chr9	LDG_10min_LTP	124.48	121.329	45	45	0	0	0	0	0	0	0	0	atypical chemokine receptor 3 [Source:RGD Symbol;Acc:620601]
Ackr3	chr9	LDG_60min_LTP	113.92	123.302	43	39	4	4	2	2	1	1	1	1	atypical chemokine receptor 3 [Source:RGD Symbol;Acc:620601]
Ackr3	chr9	RDG_10min_no_LTP	122.43	123.846	39	38	1	1	0	0	0	0	1	1	atypical chemokine receptor 3 [Source:RGD Symbol;Acc:620601]
Ackr3	chr9	RDG_60min_no_LTP	106.82	114.672	57	57	0	0	0	0	0	0	0	0	atypical chemokine receptor 3 [Source:RGD Symbol;Acc:620601]
Ackr4	chr8	LDG_10min_LTP	105.84	105.84	2	1	1	2	0	0	0	0	1	2	atypical chemokine receptor 4 [Source:RGD Symbol;Acc:1596453]
Ackr4	chr8	RDG_10min_no_LTP	89.685	87.44	4	4	0	0	0	0	0	0	0	0	atypical chemokine receptor 4 [Source:RGD Symbol;Acc:1596453]
Ackr4	chr8	RDG_60min_no_LTP	158.915	158.915	2	2	0	0	0	0	0	0	0	0	atypical chemokine receptor 4 [Source:RGD Symbol;Acc:1596453]
Acly	chr10	LDG_10min_LTP	120.7	135.293	205	201	4	4	2	2	1	1	1	1	ATP citrate lyase [Source:RGD Symbol;Acc:2018]
Acly	chr10	LDG_60min_LTP	126.195	134.184	178	173	5	5	3	3	0	0	2	2	ATP citrate lyase [Source:RGD Symbol;Acc:2018]
Acly	chr10	RDG_10min_no_LTP	123.18	129.819	160	152	8	9	5	6	2	2	1	1	ATP citrate lyase [Source:RGD Symbol;Acc:2018]
Acly	chr10	RDG_60min_no_LTP	121.86	136.514	235	231	4	4	0	0	2	2	2	2	ATP citrate lyase [Source:RGD Symbol;Acc:2018]
Aco1	chr5	LDG_10min_LTP	105.085	113.689	30	30	0	0	0	0	0	0	0	0	aconitase 1 [Source:RGD Symbol;Acc:2019]
Aco1	chr5	LDG_60min_LTP	102.61	132.541	27	26	1	1	0	0	1	1	0	0	aconitase 1 [Source:RGD Symbol;Acc:2019]
Aco1	chr5	RDG_10min_no_LTP	92.66	110.388	24	24	0	0	0	0	0	0	0	0	aconitase 1 [Source:RGD Symbol;Acc:2019]
Aco1	chr5	RDG_60min_no_LTP	100.825	107.474	28	28	0	0	0	0	0	0	0	0	aconitase 1 [Source:RGD Symbol;Acc:2019]
Aco2	chr7	LDG_10min_LTP	99.845	104.707	634	611	23	32	9	9	10	15	7	8	aconitase 2 [Source:RGD Symbol;Acc:621360]
Aco2	chr7	LDG_60min_LTP	95.65	101.533	495	478	17	18	5	5	5	6	7	7	aconitase 2 [Source:RGD Symbol;Acc:621360]
Aco2	chr7	RDG_10min_no_LTP	97.72	105.363	455	439	16	20	6	7	8	9	3	4	aconitase 2 [Source:RGD Symbol;Acc:621360]
Aco2	chr7	RDG_60min_no_LTP	99.175	104.336	630	606	24	30	12	13	6	8	8	9	aconitase 2 [Source:RGD Symbol;Acc:621360]
Acod1	chr15	LDG_10min_LTP	75.79	75.79	1	1	0	0	0	0	0	0	0	0	aconitate decarboxylase 1 [Source:RGD Symbol;Acc:1563454]
Acot1	chr6	LDG_10min_LTP	100.54	95.8129	7	7	0	0	0	0	0	0	0	0	acyl-CoA thioesterase 1 [Source:RGD Symbol;Acc:70894]
Acot1	chr6	LDG_60min_LTP	74.795	87.8075	4	4	0	0	0	0	0	0	0	0	acyl-CoA thioesterase 1 [Source:RGD Symbol;Acc:70894]
Acot1	chr6	RDG_10min_no_LTP	70.79	76.936	10	10	0	0	0	0	0	0	0	0	acyl-CoA thioesterase 1 [Source:RGD Symbol;Acc:70894]
Acot1	chr6	RDG_60min_no_LTP	98.45	112.635	6	6	0	0	0	0	0	0	0	0	acyl-CoA thioesterase 1 [Source:RGD Symbol;Acc:70894]
Acot11	chr5	LDG_10min_LTP	134.64	138.441	12	12	0	0	0	0	0	0	0	0	acyl-CoA thioesterase 11 [Source:RGD Symbol;Acc:2324815]
Acot11	chr5	LDG_60min_LTP	150.91	135.785	11	11	0	0	0	0	0	0	0	0	acyl-CoA thioesterase 11 [Source:RGD Symbol;Acc:2324815]
Acot11	chr5	RDG_10min_no_LTP	96.46	100.749	7	7	0	0	0	0	0	0	0	0	acyl-CoA thioesterase 11 [Source:RGD Symbol;Acc:2324815]
Acot11	chr5	RDG_60min_no_LTP	96.21	104.246	17	17	0	0	0	0	0	0	0	0	acyl-CoA thioesterase 11 [Source:RGD Symbol;Acc:2324815]
Acot13	chr17	LDG_10min_LTP	85.025	100.952	44	41	3	3	0	0	2	2	1	1	acyl-CoA thioesterase 13 [Source:RGD Symbol;Acc:1306513]
Acot13	chr17	LDG_60min_LTP	78.58	91.6525	40	39	1	2	1	2	0	0	0	0	acyl-CoA thioesterase 13 [Source:RGD Symbol;Acc:1306513]
Acot13	chr17	RDG_10min_no_LTP	119.97	120.826	46	43	3	3	1	1	0	0	2	2	acyl-CoA thioesterase 13 [Source:RGD Symbol;Acc:1306513]
Acot13	chr17	RDG_60min_no_LTP	118.25	116.314	61	59	2	2	1	1	1	1	0	0	acyl-CoA thioesterase 13 [Source:RGD Symbol;Acc:1306513]
Acot2	chr6	LDG_10min_LTP	93.905	101.988	20	20	0	0	0	0	0	0	0	0	acyl-CoA thioesterase 2 [Source:RGD Symbol;Acc:621055]
Acot2	chr6	LDG_60min_LTP	94.94	110.067	12	12	0	0	0	0	0	0	0	0	acyl-CoA thioesterase 2 [Source:RGD Symbol;Acc:621055]
Acot2	chr6	RDG_10min_no_LTP	126.24	141.684	17	17	0	0	0	0	0	0	0	0	acyl-CoA thioesterase 2 [Source:RGD Symbol;Acc:621055]
Acot2	chr6	RDG_60min_no_LTP	97.245	105.342	26	26	0	0	0	0	0	0	0	0	acyl-CoA thioesterase 2 [Source:RGD Symbol;Acc:621055]
Acot3	chr6	LDG_10min_LTP	96.05	117.899	17	17	0	0	0	0	0	0	0	0	acyl-CoA thioesterase 3 [Source:RGD Symbol;Acc:1564089]
Acot3	chr6	LDG_60min_LTP	120.89	126.598	13	13	0	0	0	0	0	0	0	0	acyl-CoA thioesterase 3 [Source:RGD Symbol;Acc:1564089]
Acot3	chr6	RDG_10min_no_LTP	128.805	142.977	20	19	1	1	0	0	0	0	1	1	acyl-CoA thioesterase 3 [Source:RGD Symbol;Acc:1564089]
Acot3	chr6	RDG_60min_no_LTP	113.345	134.109	18	18	0	0	0	0	0	0	0	0	acyl-CoA thioesterase 3 [Source:RGD Symbol;Acc:1564089]
Acot4	chr6	LDG_10min_LTP	128.54	153.386	7	7	0	0	0	0	0	0	0	0	acyl-CoA thioesterase 4 [Source:RGD Symbol;Acc:1596753]
Acot4	chr6	LDG_60min_LTP	100.26	101.29	5	5	0	0	0	0	0	0	0	0	acyl-CoA thioesterase 4 [Source:RGD Symbol;Acc:1596753]
Acot4	chr6	RDG_10min_no_LTP	153.7	136.93	5	3	2	2	0	0	2	2	0	0	acyl-CoA thioesterase 4 [Source:RGD Symbol;Acc:1596753]
Acot4	chr6	RDG_60min_no_LTP	111.76	147.027	9	9	0	0	0	0	0	0	0	0	acyl-CoA thioesterase 4 [Source:RGD Symbol;Acc:1596753]
Acot5	chr6	LDG_10min_LTP	61.5	61.5	1	1	0	0	0	0	0	0	0	0	acyl-CoA thioesterase 5 [Source:RGD Symbol;Acc:1565917]
Acot5	chr6	LDG_60min_LTP	17.64	17.64	1	1	0	0	0	0	0	0	0	0	acyl-CoA thioesterase 5 [Source:RGD Symbol;Acc:1565917]
Acot5	chr6	RDG_60min_no_LTP	93.63	91.2125	4	4	0	0	0	0	0	0	0	0	acyl-CoA thioesterase 5 [Source:RGD Symbol;Acc:1565917]
Acot7	chr5	LDG_10min_LTP	113.93	121.465	501	476	25	28	2	4	18	18	6	6	acyl-CoA thioesterase 7 [Source:RGD Symbol;Acc:628856]
Acot7	chr5	LDG_60min_LTP	114.52	121.293	341	318	23	25	10	11	11	11	3	3	acyl-CoA thioesterase 7 [Source:RGD Symbol;Acc:628856]
Acot7	chr5	RDG_10min_no_LTP	118.4	123.275	334	315	19	19	3	3	15	15	1	1	acyl-CoA thioesterase 7 [Source:RGD Symbol;Acc:628856]
Acot7	chr5	RDG_60min_no_LTP	115.59	119.648	451	417	34	40	12	12	18	21	7	7	acyl-CoA thioesterase 7 [Source:RGD Symbol;Acc:628856]
Acot8	chr3	LDG_10min_LTP	94.58	103.03	41	41	0	0	0	0	0	0	0	0	acyl-CoA thioesterase 8 [Source:RGD Symbol;Acc:70368]
Acot8	chr3	LDG_60min_LTP	101.12	111.809	44	42	2	2	0	0	1	1	1	1	acyl-CoA thioesterase 8 [Source:RGD Symbol;Acc:70368]
Acot8	chr3	RDG_10min_no_LTP	99.895	117.237	40	39	1	1	1	1	0	0	0	0	acyl-CoA thioesterase 8 [Source:RGD Symbol;Acc:70368]
Acot8	chr3	RDG_60min_no_LTP	107.45	123.48	47	47	0	0	0	0	0	0	0	0	acyl-CoA thioesterase 8 [Source:RGD Symbol;Acc:70368]
Acot9	chrX	LDG_10min_LTP	106.57	113.757	82	78	4	5	2	2	3	3	0	0	acyl-CoA thioesterase 9 [Source:RGD Symbol;Acc:1359188]
Acot9	chrX	LDG_60min_LTP	115.41	110.236	71	69	2	3	1	1	0	0	1	2	acyl-CoA thioesterase 9 [Source:RGD Symbol;Acc:1359188]
Acot9	chrX	RDG_10min_no_LTP	90.33	101.022	73	69	4	4	2	2	0	0	2	2	acyl-CoA thioesterase 9 [Source:RGD Symbol;Acc:1359188]
Acot9	chrX	RDG_60min_no_LTP	117	119.326	98	93	5	6	2	2	2	3	1	1	acyl-CoA thioesterase 9 [Source:RGD Symbol;Acc:1359188]
Acox1	chr10	LDG_10min_LTP	118.395	123.24	114	111	3	4	2	3	0	0	1	1	acyl-CoA oxidase 1 [Source:RGD Symbol;Acc:619757]
Acox1	chr10	LDG_60min_LTP	121.37	123.955	83	81	2	3	1	1	1	1	1	1	acyl-CoA oxidase 1 [Source:RGD Symbol;Acc:619757]
Acox1	chr10	RDG_10min_no_LTP	119.68	146.798	65	63	2	2	1	1	0	0	1	1	acyl-CoA oxidase 1 [Source:RGD Symbol;Acc:619757]
Acox1	chr10	RDG_60min_no_LTP	123.46	131.952	112	108	4	4	2	2	1	1	1	1	acyl-CoA oxidase 1 [Source:RGD Symbol;Acc:619757]
Acox2	chr15	RDG_10min_no_LTP	55.93	55.93	1	1	0	0	0	0	0	0	0	0	acyl-CoA oxidase 2 [Source:RGD Symbol;Acc:628684]
Acox3	chr14	LDG_10min_LTP	155.5	163.074	34	33	1	1	1	1	0	0	0	0	acyl-CoA oxidase 3, pristanoyl [Source:RGD Symbol;Acc:69245]
Acox3	chr14	LDG_60min_LTP	108.5	130.66	29	28	1	1	1	1	0	0	0	0	acyl-CoA oxidase 3, pristanoyl [Source:RGD Symbol;Acc:69245]
Acox3	chr14	RDG_10min_no_LTP	108.77	115.369	26	26	0	0	0	0	0	0	0	0	acyl-CoA oxidase 3, pristanoyl [Source:RGD Symbol;Acc:69245]
Acox3	chr14	RDG_60min_no_LTP	132	143.883	33	31	2	2	1	1	0	0	1	1	acyl-CoA oxidase 3, pristanoyl [Source:RGD Symbol;Acc:69245]
Acp1	chr6	LDG_10min_LTP	91.765	101.742	150	141	9	10	6	6	1	1	3	3	acid phosphatase 1 [Source:RGD Symbol;Acc:2020]
Acp1	chr6	LDG_60min_LTP	88.71	105.34	133	131	2	2	1	1	0	0	1	1	acid phosphatase 1 [Source:RGD Symbol;Acc:2020]
Acp1	chr6	RDG_10min_no_LTP	98.885	118.665	118	114	4	6	2	2	0	0	2	4	acid phosphatase 1 [Source:RGD Symbol;Acc:2020]
Acp1	chr6	RDG_60min_no_LTP	106.79	118.172	173	169	4	5	1	1	2	3	1	1	acid phosphatase 1 [Source:RGD Symbol;Acc:2020]
Acp2	chr3	LDG_10min_LTP	120.81	125.978	35	35	0	0	0	0	0	0	0	0	acid phosphatase 2, lysosomal [Source:RGD Symbol;Acc:2021]
Acp2	chr3	LDG_60min_LTP	112.33	112.853	29	28	1	1	0	0	0	0	1	1	acid phosphatase 2, lysosomal [Source:RGD Symbol;Acc:2021]
Acp2	chr3	RDG_10min_no_LTP	89.52	97.1698	49	47	2	2	1	1	1	1	0	0	acid phosphatase 2, lysosomal [Source:RGD Symbol;Acc:2021]
Acp2	chr3	RDG_60min_no_LTP	122.15	128.059	61	56	5	5	4	4	1	1	0	0	acid phosphatase 2, lysosomal [Source:RGD Symbol;Acc:2021]
Acp5	chr8	LDG_10min_LTP	48.67	74.4143	7	7	0	0	0	0	0	0	0	0	acid phosphatase 5, tartrate resistant [Source:RGD Symbol;Acc:2022]
Acp5	chr8	LDG_60min_LTP	46.605	58.816	10	10	0	0	0	0	0	0	0	0	acid phosphatase 5, tartrate resistant [Source:RGD Symbol;Acc:2022]
Acp5	chr8	RDG_10min_no_LTP	211.83	160.05	3	2	1	1	1	1	0	0	0	0	acid phosphatase 5, tartrate resistant [Source:RGD Symbol;Acc:2022]
Acp5	chr8	RDG_60min_no_LTP	125.33	109.36	3	3	0	0	0	0	0	0	0	0	acid phosphatase 5, tartrate resistant [Source:RGD Symbol;Acc:2022]
Acp6	chr2	LDG_10min_LTP	86.46	105.665	17	17	0	0	0	0	0	0	0	0	acid phosphatase 6, lysophosphatidic [Source:RGD Symbol;Acc:1306336]
Acp6	chr2	LDG_60min_LTP	112.04	164.098	17	17	0	0	0	0	0	0	0	0	acid phosphatase 6, lysophosphatidic [Source:RGD Symbol;Acc:1306336]
Acp6	chr2	RDG_10min_no_LTP	67.46	103.212	10	10	0	0	0	0	0	0	0	0	acid phosphatase 6, lysophosphatidic [Source:RGD Symbol;Acc:1306336]
Acp6	chr2	RDG_60min_no_LTP	102.88	120.759	29	29	0	0	0	0	0	0	0	0	acid phosphatase 6, lysophosphatidic [Source:RGD Symbol;Acc:1306336]
Acrbp	chr4	LDG_10min_LTP	247.46	247.46	1	1	0	0	0	0	0	0	0	0	acrosin binding protein [Source:RGD Symbol;Acc:1564880]
Acrbp	chr4	LDG_60min_LTP	24.96	24.96	1	1	0	0	0	0	0	0	0	0	acrosin binding protein [Source:RGD Symbol;Acc:1564880]
Acrbp	chr4	RDG_10min_no_LTP	171.205	171.205	2	2	0	0	0	0	0	0	0	0	acrosin binding protein [Source:RGD Symbol;Acc:1564880]
Acrbp	chr4	RDG_60min_no_LTP	185.29	185.29	1	1	0	0	0	0	0	0	0	0	acrosin binding protein [Source:RGD Symbol;Acc:1564880]
Acsbg1	chr8	LDG_10min_LTP	106.74	116.127	235	223	12	15	5	5	4	7	3	3	acyl-CoA synthetase bubblegum family member 1 [Source:RGD Symbol;Acc:708557]
Acsbg1	chr8	LDG_60min_LTP	109.59	113.856	193	183	10	11	4	4	2	2	5	5	acyl-CoA synthetase bubblegum family member 1 [Source:RGD Symbol;Acc:708557]
Acsbg1	chr8	RDG_10min_no_LTP	104.21	114.423	198	193	5	7	1	2	1	1	4	4	acyl-CoA synthetase bubblegum family member 1 [Source:RGD Symbol;Acc:708557]
Acsbg1	chr8	RDG_60min_no_LTP	113.71	118.46	285	265	20	23	6	6	8	11	6	6	acyl-CoA synthetase bubblegum family member 1 [Source:RGD Symbol;Acc:708557]
Acsf2	chr10	LDG_10min_LTP	125.23	117.978	59	56	3	3	2	2	0	0	1	1	acyl-CoA synthetase family member 2 [Source:RGD Symbol;Acc:1562656]
Acsf2	chr10	LDG_60min_LTP	140	136.112	49	45	4	7	0	0	2	4	3	3	acyl-CoA synthetase family member 2 [Source:RGD Symbol;Acc:1562656]
Acsf2	chr10	RDG_10min_no_LTP	117.76	125.044	44	42	2	2	1	1	1	1	0	0	acyl-CoA synthetase family member 2 [Source:RGD Symbol;Acc:1562656]
Acsf2	chr10	RDG_60min_no_LTP	118.36	115.14	47	46	1	1	0	0	1	1	0	0	acyl-CoA synthetase family member 2 [Source:RGD Symbol;Acc:1562656]
Acsf3	chr19	LDG_10min_LTP	110.04	119.158	17	16	1	1	0	0	0	0	1	1	acyl-CoA synthetase family member 3 [Source:RGD Symbol;Acc:1586037]
Acsf3	chr19	LDG_60min_LTP	87.07	92.32	11	10	1	1	1	1	0	0	0	0	acyl-CoA synthetase family member 3 [Source:RGD Symbol;Acc:1586037]
Acsf3	chr19	RDG_10min_no_LTP	78.455	109.456	16	15	1	1	0	0	1	1	0	0	acyl-CoA synthetase family member 3 [Source:RGD Symbol;Acc:1586037]
Acsf3	chr19	RDG_60min_no_LTP	102.41	96.607	27	27	0	0	0	0	0	0	0	0	acyl-CoA synthetase family member 3 [Source:RGD Symbol;Acc:1586037]
Acsl1	chr16	LDG_10min_LTP	129.47	132.47	42	41	1	1	0	0	0	0	1	1	acyl-CoA synthetase long-chain family member 1 [Source:RGD Symbol;Acc:2015]
Acsl1	chr16	LDG_60min_LTP	133.975	149.26	48	47	1	1	0	0	1	1	0	0	acyl-CoA synthetase long-chain family member 1 [Source:RGD Symbol;Acc:2015]
Acsl1	chr16	RDG_10min_no_LTP	128.67	134.409	31	31	0	0	0	0	0	0	0	0	acyl-CoA synthetase long-chain family member 1 [Source:RGD Symbol;Acc:2015]
Acsl1	chr16	RDG_60min_no_LTP	130.96	137.366	48	47	1	1	1	1	0	0	0	0	acyl-CoA synthetase long-chain family member 1 [Source:RGD Symbol;Acc:2015]
Acsl3	chr9	LDG_10min_LTP	141.94	142.393	312	299	13	16	5	5	7	9	2	2	acyl-CoA synthetase long-chain family member 3 [Source:RGD Symbol;Acc:70552]
Acsl3	chr9	LDG_60min_LTP	123.7	137.873	283	274	9	11	6	7	3	3	1	1	acyl-CoA synthetase long-chain family member 3 [Source:RGD Symbol;Acc:70552]
Acsl3	chr9	RDG_10min_no_LTP	124.675	134.025	238	232	6	6	4	4	0	0	2	2	acyl-CoA synthetase long-chain family member 3 [Source:RGD Symbol;Acc:70552]
Acsl3	chr9	RDG_60min_no_LTP	123.7	134.427	333	317	16	19	8	8	5	7	4	4	acyl-CoA synthetase long-chain family member 3 [Source:RGD Symbol;Acc:70552]
Acsl4	chrX	LDG_10min_LTP	121.45	127.39	164	162	2	2	1	1	1	1	0	0	acyl-CoA synthetase long-chain family member 4 [Source:RGD Symbol;Acc:69401]
Acsl4	chrX	LDG_60min_LTP	119.64	137.498	193	186	7	7	3	3	2	2	2	2	acyl-CoA synthetase long-chain family member 4 [Source:RGD Symbol;Acc:69401]
Acsl4	chrX	RDG_10min_no_LTP	126.35	133.407	113	108	5	5	2	2	1	1	2	2	acyl-CoA synthetase long-chain family member 4 [Source:RGD Symbol;Acc:69401]
Acsl4	chrX	RDG_60min_no_LTP	126.41	135.034	155	151	4	4	2	2	1	1	1	1	acyl-CoA synthetase long-chain family member 4 [Source:RGD Symbol;Acc:69401]
Acsl5	chr1	LDG_10min_LTP	92.36	98.2718	100	97	3	3	1	1	1	1	1	1	acyl-CoA synthetase long-chain family member 5 [Source:RGD Symbol;Acc:69402]
Acsl5	chr1	LDG_60min_LTP	91.04	98.4622	103	99	4	4	1	1	2	2	1	1	acyl-CoA synthetase long-chain family member 5 [Source:RGD Symbol;Acc:69402]
Acsl5	chr1	RDG_10min_no_LTP	104.535	104.208	84	80	4	5	1	1	1	1	2	3	acyl-CoA synthetase long-chain family member 5 [Source:RGD Symbol;Acc:69402]
Acsl5	chr1	RDG_60min_no_LTP	133.575	126.299	114	112	2	2	1	1	1	1	0	0	acyl-CoA synthetase long-chain family member 5 [Source:RGD Symbol;Acc:69402]
Acsl6	chr10	LDG_10min_LTP	106.54	118.892	196	176	20	27	3	3	17	23	1	1	acyl-CoA synthetase long-chain family member 6 [Source:RGD Symbol;Acc:69403]
Acsl6	chr10	LDG_60min_LTP	103.42	117.662	163	144	19	24	2	2	15	19	3	3	acyl-CoA synthetase long-chain family member 6 [Source:RGD Symbol;Acc:69403]
Acsl6	chr10	RDG_10min_no_LTP	117.86	121.548	133	114	19	27	5	6	12	18	2	3	acyl-CoA synthetase long-chain family member 6 [Source:RGD Symbol;Acc:69403]
Acsl6	chr10	RDG_60min_no_LTP	107.48	122.984	214	185	29	43	4	4	20	34	5	5	acyl-CoA synthetase long-chain family member 6 [Source:RGD Symbol;Acc:69403]
Acsm1	chr1	LDG_10min_LTP	135.48	135.48	1	1	0	0	0	0	0	0	0	0
Acsm3	chr1	LDG_60min_LTP	73.905	73.905	2	2	0	0	0	0	0	0	0	0	acyl-CoA synthetase medium-chain family member 3 [Source:RGD Symbol;Acc:62086]
Acsm5	chr1	LDG_10min_LTP	100.08	120.916	5	5	0	0	0	0	0	0	0	0	acyl-CoA synthetase medium-chain family member 5 [Source:RGD Symbol;Acc:1309578]
Acsm5	chr1	LDG_60min_LTP	33.19	33.19	1	1	0	0	0	0	0	0	0	0	acyl-CoA synthetase medium-chain family member 5 [Source:RGD Symbol;Acc:1309578]
Acsm5	chr1	RDG_10min_no_LTP	91.345	92.2575	4	4	0	0	0	0	0	0	0	0	acyl-CoA synthetase medium-chain family member 5 [Source:RGD Symbol;Acc:1309578]
Acsm5	chr1	RDG_60min_no_LTP	51.62	66.5133	3	3	0	0	0	0	0	0	0	0	acyl-CoA synthetase medium-chain family member 5 [Source:RGD Symbol;Acc:1309578]
Acss1	chr3	LDG_10min_LTP	126.42	134.334	37	37	0	0	0	0	0	0	0	0	acyl-CoA synthetase short-chain family member 1 [Source:RGD Symbol;Acc:1306246]
Acss1	chr3	LDG_60min_LTP	69.84	104.112	23	22	1	1	0	0	0	0	1	1	acyl-CoA synthetase short-chain family member 1 [Source:RGD Symbol;Acc:1306246]
Acss1	chr3	RDG_10min_no_LTP	114.975	120.409	20	20	0	0	0	0	0	0	0	0	acyl-CoA synthetase short-chain family member 1 [Source:RGD Symbol;Acc:1306246]
Acss1	chr3	RDG_60min_no_LTP	138.52	146.761	42	41	1	1	0	0	0	0	1	1	acyl-CoA synthetase short-chain family member 1 [Source:RGD Symbol;Acc:1306246]
Acss2	chr3	LDG_10min_LTP	136.625	135.555	84	79	5	5	3	3	1	1	1	1	acyl-CoA synthetase short-chain family member 2 [Source:RGD Symbol;Acc:1305489]
Acss2	chr3	LDG_60min_LTP	106.365	128.935	82	79	3	3	2	2	0	0	1	1	acyl-CoA synthetase short-chain family member 2 [Source:RGD Symbol;Acc:1305489]
Acss2	chr3	RDG_10min_no_LTP	112.39	121.758	70	70	0	0	0	0	0	0	0	0	acyl-CoA synthetase short-chain family member 2 [Source:RGD Symbol;Acc:1305489]
Acss2	chr3	RDG_60min_no_LTP	135.89	140.757	86	84	2	2	0	0	2	2	0	0	acyl-CoA synthetase short-chain family member 2 [Source:RGD Symbol;Acc:1305489]
Acss3	chr7	LDG_10min_LTP	159.36	142.536	5	5	0	0	0	0	0	0	0	0	acyl-CoA synthetase short-chain family member 3 [Source:RGD Symbol;Acc:1307051]
Acss3	chr7	LDG_60min_LTP	26.24	75.0467	3	3	0	0	0	0	0	0	0	0	acyl-CoA synthetase short-chain family member 3 [Source:RGD Symbol;Acc:1307051]
Acss3	chr7	RDG_10min_no_LTP	154.71	139.143	10	9	1	2	0	0	0	0	1	2	acyl-CoA synthetase short-chain family member 3 [Source:RGD Symbol;Acc:1307051]
Acss3	chr7	RDG_60min_no_LTP	140.04	141.963	6	6	0	0	0	0	0	0	0	0	acyl-CoA synthetase short-chain family member 3 [Source:RGD Symbol;Acc:1307051]
Acta1	chr19	LDG_10min_LTP	86.08	90.3835	51	48	3	6	2	2	0	0	1	4	actin, alpha 1, skeletal muscle [Source:RGD Symbol;Acc:2025]
Acta1	chr19	LDG_60min_LTP	63.525	79.4127	56	53	3	3	1	1	1	1	1	1	actin, alpha 1, skeletal muscle [Source:RGD Symbol;Acc:2025]
Acta1	chr19	RDG_10min_no_LTP	72.85	93.8079	43	42	1	1	0	0	1	1	0	0	actin, alpha 1, skeletal muscle [Source:RGD Symbol;Acc:2025]
Acta1	chr19	RDG_60min_no_LTP	86.08	102.712	90	87	3	3	0	0	1	1	2	2	actin, alpha 1, skeletal muscle [Source:RGD Symbol;Acc:2025]
Acta2	chr1	LDG_10min_LTP	52.04	54.6871	7	7	0	0	0	0	0	0	0	0	actin alpha 2, smooth muscle [Source:RGD Symbol;Acc:621676]
Acta2	chr1	LDG_60min_LTP	60.025	80.2094	18	17	1	1	1	1	0	0	0	0	actin alpha 2, smooth muscle [Source:RGD Symbol;Acc:621676]
Acta2	chr1	RDG_10min_no_LTP	88.15	98.52	18	17	1	1	0	0	1	1	0	0	actin alpha 2, smooth muscle [Source:RGD Symbol;Acc:621676]
Acta2	chr1	RDG_60min_no_LTP	53.8	62.3481	16	16	0	0	0	0	0	0	0	0	actin alpha 2, smooth muscle [Source:RGD Symbol;Acc:621676]
Actb	chr12	LDG_10min_LTP	113.235	119.036	7490	7289	201	220	95	102	49	53	62	65	actin, beta [Source:RGD Symbol;Acc:628837]
Actb	chr12	LDG_60min_LTP	119.67	120.571	6737	6542	195	212	84	87	61	69	55	56	actin, beta [Source:RGD Symbol;Acc:628837]
Actb	chr12	RDG_10min_no_LTP	98.53	104.293	4645	4522	123	140	54	56	40	51	31	33	actin, beta [Source:RGD Symbol;Acc:628837]
Actb	chr12	RDG_60min_no_LTP	103.48	109.82	6254	6079	175	185	80	84	40	44	56	57	actin, beta [Source:RGD Symbol;Acc:628837]
Actbl2	chr2	LDG_10min_LTP	56.91	56.91	2	2	0	0	0	0	0	0	0	0	actin, beta-like 2 [Source:RGD Symbol;Acc:1309504]
Actbl2	chr2	LDG_60min_LTP	34.505	40.9725	8	8	0	0	0	0	0	0	0	0	actin, beta-like 2 [Source:RGD Symbol;Acc:1309504]
Actbl2	chr2	RDG_10min_no_LTP	49.795	49.795	2	2	0	0	0	0	0	0	0	0	actin, beta-like 2 [Source:RGD Symbol;Acc:1309504]
Actbl2	chr2	RDG_60min_no_LTP	41.57	50.8678	9	9	0	0	0	0	0	0	0	0	actin, beta-like 2 [Source:RGD Symbol;Acc:1309504]
Actc1	chr3	LDG_10min_LTP	52.45	63.14	8	8	0	0	0	0	0	0	0	0	actin, alpha, cardiac muscle 1 [Source:RGD Symbol;Acc:2026]
Actc1	chr3	LDG_60min_LTP	74.92	69.4356	9	9	0	0	0	0	0	0	0	0	actin, alpha, cardiac muscle 1 [Source:RGD Symbol;Acc:2026]
Actc1	chr3	RDG_10min_no_LTP	35.36	38.8758	153	146	7	7	3	3	1	1	3	3	actin, alpha, cardiac muscle 1 [Source:RGD Symbol;Acc:2026]
Actc1	chr3	RDG_60min_no_LTP	46.91	61.8254	13	13	0	0	0	0	0	0	0	0	actin, alpha, cardiac muscle 1 [Source:RGD Symbol;Acc:2026]
Actg1	chr10	LDG_10min_LTP	125.62	130.715	3575	3477	98	104	38	38	26	29	36	37	actin, gamma 1 [Source:RGD Symbol;Acc:1304556]
Actg1	chr10	LDG_60min_LTP	127.92	125.223	3153	3056	97	110	50	54	17	19	34	37	actin, gamma 1 [Source:RGD Symbol;Acc:1304556]
Actg1	chr10	RDG_10min_no_LTP	108.665	116.404	2056	2009	47	51	20	21	11	13	17	17	actin, gamma 1 [Source:RGD Symbol;Acc:1304556]
Actg1	chr10	RDG_60min_no_LTP	116.69	121.882	3166	3091	75	82	38	38	18	21	22	23	actin, gamma 1 [Source:RGD Symbol;Acc:1304556]
Actg2	chr4	RDG_10min_no_LTP	130.78	130.78	1	1	0	0	0	0	0	0	0	0	actin gamma 2, smooth muscle [Source:RGD Symbol;Acc:2027]
Actl10	chr3	RDG_10min_no_LTP	155.81	155.81	1	1	0	0	0	0	0	0	0	0	actin-like 10 [Source:RGD Symbol;Acc:6491130]
Actl6a	chr2	LDG_10min_LTP	164.89	161.114	12	12	0	0	0	0	0	0	0	0	actin-like 6A [Source:RGD Symbol;Acc:1307747]
Actl6a	chr2	LDG_60min_LTP	103.78	128.972	12	12	0	0	0	0	0	0	0	0	actin-like 6A [Source:RGD Symbol;Acc:1307747]
Actl6a	chr2	RDG_10min_no_LTP	75.77	104.018	13	13	0	0	0	0	0	0	0	0	actin-like 6A [Source:RGD Symbol;Acc:1307747]
Actl6a	chr2	RDG_60min_no_LTP	185.695	176.586	18	18	0	0	0	0	0	0	0	0	actin-like 6A [Source:RGD Symbol;Acc:1307747]
Actl6b	chr12	LDG_10min_LTP	96.07	119.874	125	117	8	8	2	2	5	5	1	1	actin-like 6B [Source:RGD Symbol;Acc:1307763]
Actl6b	chr12	LDG_60min_LTP	116.82	130.148	121	114	7	10	2	2	4	5	2	3	actin-like 6B [Source:RGD Symbol;Acc:1307763]
Actl6b	chr12	RDG_10min_no_LTP	103.99	116.679	92	83	9	10	0	0	7	8	2	2	actin-like 6B [Source:RGD Symbol;Acc:1307763]
Actl6b	chr12	RDG_60min_no_LTP	123.16	132.268	163	149	14	17	2	2	10	12	3	3	actin-like 6B [Source:RGD Symbol;Acc:1307763]
Actn1	chr6	LDG_10min_LTP	155.27	143.968	122	122	0	0	0	0	0	0	0	0	actinin, alpha 1 [Source:RGD Symbol;Acc:70907]
Actn1	chr6	LDG_60min_LTP	188.97	173.014	108	105	3	3	1	1	2	2	0	0	actinin, alpha 1 [Source:RGD Symbol;Acc:70907]
Actn1	chr6	RDG_10min_no_LTP	147.96	155.387	59	53	6	6	1	1	4	4	1	1	actinin, alpha 1 [Source:RGD Symbol;Acc:70907]
Actn1	chr6	RDG_60min_no_LTP	127.665	144.199	112	108	4	4	1	1	1	1	2	2	actinin, alpha 1 [Source:RGD Symbol;Acc:70907]
Actn2	chr17	LDG_10min_LTP	100.37	123.838	27	20	7	8	1	1	6	7	0	0	actinin alpha 2 [Source:RGD Symbol;Acc:1308097]
Actn2	chr17	LDG_60min_LTP	113.97	123.517	36	28	8	9	4	4	5	5	0	0	actinin alpha 2 [Source:RGD Symbol;Acc:1308097]
Actn2	chr17	RDG_10min_no_LTP	105.45	118.13	31	23	8	10	1	1	8	9	0	0	actinin alpha 2 [Source:RGD Symbol;Acc:1308097]
Actn2	chr17	RDG_60min_no_LTP	102.42	118.24	50	41	9	10	1	1	8	9	0	0	actinin alpha 2 [Source:RGD Symbol;Acc:1308097]
Actn3	chr1	LDG_10min_LTP	48.96	48.96	1	1	0	0	0	0	0	0	0	0	actinin alpha 3 [Source:RGD Symbol;Acc:621792]
Actn4	chr1	LDG_10min_LTP	124.19	129.588	122	117	5	6	1	1	2	3	2	2	actinin alpha 4 [Source:RGD Symbol;Acc:61816]
Actn4	chr1	LDG_60min_LTP	121.29	133.919	101	98	3	4	1	2	1	1	1	1	actinin alpha 4 [Source:RGD Symbol;Acc:61816]
Actn4	chr1	RDG_10min_no_LTP	114.15	121.457	83	80	3	3	1	1	1	1	1	1	actinin alpha 4 [Source:RGD Symbol;Acc:61816]
Actn4	chr1	RDG_60min_no_LTP	82.52	108.312	119	116	3	3	1	1	1	1	1	1	actinin alpha 4 [Source:RGD Symbol;Acc:61816]
Actr10	chr6	LDG_10min_LTP	97.21	107.442	138	132	6	7	2	2	1	1	3	4	actin related protein 10 [Source:RGD Symbol;Acc:1306515]
Actr10	chr6	LDG_60min_LTP	92.965	108.195	124	121	3	4	1	1	0	0	3	3	actin related protein 10 [Source:RGD Symbol;Acc:1306515]
Actr10	chr6	RDG_10min_no_LTP	102	113.813	131	128	3	4	2	2	1	2	0	0	actin related protein 10 [Source:RGD Symbol;Acc:1306515]
Actr10	chr6	RDG_60min_no_LTP	105.98	114.94	164	161	3	3	2	2	0	0	1	1	actin related protein 10 [Source:RGD Symbol;Acc:1306515]
Actr1a	chr1	LDG_10min_LTP	104.12	111.611	329	319	10	10	4	4	2	2	4	4	actin related protein 1A [Source:RGD Symbol;Acc:1307025]
Actr1a	chr1	LDG_60min_LTP	105.17	112.144	260	250	10	10	3	3	3	3	4	4	actin related protein 1A [Source:RGD Symbol;Acc:1307025]
Actr1a	chr1	RDG_10min_no_LTP	108.8	117.411	240	232	8	8	5	5	0	0	3	3	actin related protein 1A [Source:RGD Symbol;Acc:1307025]
Actr1a	chr1	RDG_60min_no_LTP	120.92	123.429	381	362	19	22	5	5	8	8	8	9	actin related protein 1A [Source:RGD Symbol;Acc:1307025]
Actr1b	chr9	LDG_10min_LTP	113.53	121.488	352	340	12	14	6	7	4	4	3	3	actin related protein 1B [Source:RGD Symbol;Acc:1307380]
Actr1b	chr9	LDG_60min_LTP	115.09	126.653	292	280	12	12	4	4	4	4	4	4	actin related protein 1B [Source:RGD Symbol;Acc:1307380]
Actr1b	chr9	RDG_10min_no_LTP	117.12	126.126	285	278	7	7	4	4	1	1	2	2	actin related protein 1B [Source:RGD Symbol;Acc:1307380]
Actr1b	chr9	RDG_60min_no_LTP	122.92	132.025	357	339	18	19	8	8	8	9	2	2	actin related protein 1B [Source:RGD Symbol;Acc:1307380]
Actr2	chr14	LDG_10min_LTP	105.87	117.103	563	539	24	28	8	8	13	16	4	4	actin related protein 2 [Source:RGD Symbol;Acc:1310826]
Actr2	chr14	LDG_60min_LTP	97.975	109.513	478	458	20	22	8	8	7	8	5	6	actin related protein 2 [Source:RGD Symbol;Acc:1310826]
Actr2	chr14	RDG_10min_no_LTP	104.74	116.015	397	376	21	23	4	4	8	10	9	9	actin related protein 2 [Source:RGD Symbol;Acc:1310826]
Actr2	chr14	RDG_60min_no_LTP	107.81	121.513	547	513	34	43	10	10	20	25	8	8	actin related protein 2 [Source:RGD Symbol;Acc:1310826]
Actr3	chr13	LDG_10min_LTP	82.33	94.9843	425	414	11	13	2	2	3	4	7	7	actin related protein 3 [Source:RGD Symbol;Acc:71024]
Actr3	chr13	LDG_60min_LTP	61.235	80.4638	370	361	9	9	3	3	3	3	3	3	actin related protein 3 [Source:RGD Symbol;Acc:71024]
Actr3	chr13	RDG_10min_no_LTP	86.1	106.315	296	289	7	8	3	4	2	2	2	2	actin related protein 3 [Source:RGD Symbol;Acc:71024]
Actr3	chr13	RDG_60min_no_LTP	94.22	104.479	443	426	17	18	8	8	8	9	1	1	actin related protein 3 [Source:RGD Symbol;Acc:71024]
Actr3b	chr4	LDG_10min_LTP	107.9	115.344	149	145	4	4	4	4	0	0	0	0	actin related protein 3B [Source:RGD Symbol;Acc:1565759]
Actr3b	chr4	LDG_60min_LTP	91.2	117.222	149	143	6	8	4	5	1	1	2	2	actin related protein 3B [Source:RGD Symbol;Acc:1565759]
Actr3b	chr4	RDG_10min_no_LTP	106.69	111.923	111	109	2	2	2	2	0	0	0	0	actin related protein 3B [Source:RGD Symbol;Acc:1565759]
Actr3b	chr4	RDG_60min_no_LTP	111.24	113.291	167	163	4	9	3	5	0	0	2	4	actin related protein 3B [Source:RGD Symbol;Acc:1565759]
Actr5	chr3	LDG_10min_LTP	159.71	136.506	7	7	0	0	0	0	0	0	0	0	actin related protein 5 [Source:RGD Symbol;Acc:1307958]
Actr5	chr3	LDG_60min_LTP	183.35	184.376	9	9	0	0	0	0	0	0	0	0	actin related protein 5 [Source:RGD Symbol;Acc:1307958]
Actr5	chr3	RDG_10min_no_LTP	216.405	198.438	6	6	0	0	0	0	0	0	0	0	actin related protein 5 [Source:RGD Symbol;Acc:1307958]
Actr5	chr3	RDG_60min_no_LTP	129.94	123.363	12	12	0	0	0	0	0	0	0	0	actin related protein 5 [Source:RGD Symbol;Acc:1307958]
Actr6	chr7	LDG_10min_LTP	146.55	141.31	33	31	2	2	0	0	0	0	2	2	actin related protein 6 [Source:RGD Symbol;Acc:1304609]
Actr6	chr7	LDG_60min_LTP	133.65	140.751	33	33	0	0	0	0	0	0	0	0	actin related protein 6 [Source:RGD Symbol;Acc:1304609]
Actr6	chr7	RDG_10min_no_LTP	123.86	131.289	26	25	1	3	1	2	0	0	1	1	actin related protein 6 [Source:RGD Symbol;Acc:1304609]
Actr6	chr7	RDG_60min_no_LTP	123.655	123.032	36	34	2	2	2	2	0	0	0	0	actin related protein 6 [Source:RGD Symbol;Acc:1304609]
Actr8	chr16	LDG_10min_LTP	136.545	126.335	48	46	2	3	1	1	1	1	1	1	actin related protein 8 [Source:RGD Symbol;Acc:1311878]
Actr8	chr16	LDG_60min_LTP	71.285	97.0078	40	39	1	1	1	1	0	0	0	0	actin related protein 8 [Source:RGD Symbol;Acc:1311878]
Actr8	chr16	RDG_10min_no_LTP	117.79	115.872	45	45	0	0	0	0	0	0	0	0	actin related protein 8 [Source:RGD Symbol;Acc:1311878]
Actr8	chr16	RDG_60min_no_LTP	93.3	110.505	73	72	1	1	1	1	0	0	0	0	actin related protein 8 [Source:RGD Symbol;Acc:1311878]
Actrt3	chr2	RDG_10min_no_LTP	119	97.2533	3	3	0	0	0	0	0	0	0	0	actin-related protein T3 [Source:RGD Symbol;Acc:1561457]
Acvr1	chr3	LDG_10min_LTP	120.28	113.182	42	42	0	0	0	0	0	0	0	0	activin A receptor type 1 [Source:RGD Symbol;Acc:620200]
Acvr1	chr3	LDG_60min_LTP	127.58	133.279	47	47	0	0	0	0	0	0	0	0	activin A receptor type 1 [Source:RGD Symbol;Acc:620200]
Acvr1	chr3	RDG_10min_no_LTP	84.15	97.8664	39	38	1	1	0	0	0	0	1	1	activin A receptor type 1 [Source:RGD Symbol;Acc:620200]
Acvr1	chr3	RDG_60min_no_LTP	115.48	129.796	54	53	1	1	0	0	1	1	0	0	activin A receptor type 1 [Source:RGD Symbol;Acc:620200]
Acvr1b	chr7	LDG_10min_LTP	114.695	134.07	56	54	2	2	1	1	0	0	1	1	activin A receptor type 1B [Source:RGD Symbol;Acc:735207]
Acvr1b	chr7	LDG_60min_LTP	101.705	122.756	48	46	2	2	1	1	0	0	1	1	activin A receptor type 1B [Source:RGD Symbol;Acc:735207]
Acvr1b	chr7	RDG_10min_no_LTP	126	131.39	49	46	3	4	3	4	0	0	0	0	activin A receptor type 1B [Source:RGD Symbol;Acc:735207]
Acvr1b	chr7	RDG_60min_no_LTP	97.75	120.181	84	82	2	2	1	1	1	1	0	0	activin A receptor type 1B [Source:RGD Symbol;Acc:735207]
Acvr1c	chr3	LDG_10min_LTP	95.57	114.522	17	17	0	0	0	0	0	0	0	0	activin A receptor type 1C [Source:RGD Symbol;Acc:621789]
Acvr1c	chr3	LDG_60min_LTP	85.14	111.7	23	23	0	0	0	0	0	0	0	0	activin A receptor type 1C [Source:RGD Symbol;Acc:621789]
Acvr1c	chr3	RDG_10min_no_LTP	118.885	131.84	20	20	0	0	0	0	0	0	0	0	activin A receptor type 1C [Source:RGD Symbol;Acc:621789]
Acvr1c	chr3	RDG_60min_no_LTP	128.23	131.483	20	19	1	1	0	0	0	0	1	1	activin A receptor type 1C [Source:RGD Symbol;Acc:621789]
Acvr2a	chr3	LDG_10min_LTP	100.5	109.626	26	25	1	1	0	0	1	1	0	0	activin A receptor type 2A [Source:RGD Symbol;Acc:70911]
Acvr2a	chr3	LDG_60min_LTP	184.83	167.949	15	14	1	1	1	1	0	0	0	0	activin A receptor type 2A [Source:RGD Symbol;Acc:70911]
Acvr2a	chr3	RDG_10min_no_LTP	106.605	130.105	44	44	0	0	0	0	0	0	0	0	activin A receptor type 2A [Source:RGD Symbol;Acc:70911]
Acvr2a	chr3	RDG_60min_no_LTP	107.685	133.57	52	50	2	2	2	2	0	0	0	0	activin A receptor type 2A [Source:RGD Symbol;Acc:70911]
Acvr2b	chr8	LDG_10min_LTP	81.04	116.218	5	5	0	0	0	0	0	0	0	0	activin A receptor type 2B [Source:RGD Symbol;Acc:2028]
Acvr2b	chr8	LDG_60min_LTP	121.865	120.845	6	6	0	0	0	0	0	0	0	0	activin A receptor type 2B [Source:RGD Symbol;Acc:2028]
Acvr2b	chr8	RDG_10min_no_LTP	146.415	142.008	10	9	1	1	1	1	0	0	0	0	activin A receptor type 2B [Source:RGD Symbol;Acc:2028]
Acvr2b	chr8	RDG_60min_no_LTP	129.005	140.492	6	6	0	0	0	0	0	0	0	0	activin A receptor type 2B [Source:RGD Symbol;Acc:2028]
Acvrl1	chr7	LDG_10min_LTP	93.08	95.2545	11	11	0	0	0	0	0	0	0	0	activin A receptor like type 1 [Source:RGD Symbol;Acc:2029]
Acvrl1	chr7	LDG_60min_LTP	165.66	143.055	4	4	0	0	0	0	0	0	0	0	activin A receptor like type 1 [Source:RGD Symbol;Acc:2029]
Acvrl1	chr7	RDG_10min_no_LTP	31.52	57.6533	3	3	0	0	0	0	0	0	0	0	activin A receptor like type 1 [Source:RGD Symbol;Acc:2029]
Acvrl1	chr7	RDG_60min_no_LTP	91.025	123.348	12	12	0	0	0	0	0	0	0	0	activin A receptor like type 1 [Source:RGD Symbol;Acc:2029]
Acy1	chr8	LDG_10min_LTP	138.32	140.282	49	46	3	4	2	2	1	1	1	1	aminoacylase 1 [Source:RGD Symbol;Acc:2030]
Acy1	chr8	LDG_60min_LTP	101.46	115.897	35	33	2	2	1	1	1	1	0	0	aminoacylase 1 [Source:RGD Symbol;Acc:2030]
Acy1	chr8	RDG_10min_no_LTP	101.57	117.355	37	36	1	1	1	1	0	0	0	0	aminoacylase 1 [Source:RGD Symbol;Acc:2030]
Acy1	chr8	RDG_60min_no_LTP	117.32	135.24	37	36	1	1	1	1	0	0	0	0	aminoacylase 1 [Source:RGD Symbol;Acc:2030]
Acy3	chr1	LDG_10min_LTP	84.21	101.401	8	8	0	0	0	0	0	0	0	0	aminoacylase 3 [Source:RGD Symbol;Acc:1305394]
Acy3	chr1	LDG_60min_LTP	95.5	102.248	12	12	0	0	0	0	0	0	0	0	aminoacylase 3 [Source:RGD Symbol;Acc:1305394]
Acy3	chr1	RDG_10min_no_LTP	90.42	107.036	13	13	0	0	0	0	0	0	0	0	aminoacylase 3 [Source:RGD Symbol;Acc:1305394]
Acy3	chr1	RDG_60min_no_LTP	95.04	99.5812	16	16	0	0	0	0	0	0	0	0	aminoacylase 3 [Source:RGD Symbol;Acc:1305394]
Acyp1	chr6	LDG_10min_LTP	91.6	113.93	45	44	1	1	0	0	0	0	1	1	acylphosphatase 1 [Source:RGD Symbol;Acc:1311327]
Acyp1	chr6	LDG_60min_LTP	90.04	105.916	31	29	2	2	0	0	1	1	1	1	acylphosphatase 1 [Source:RGD Symbol;Acc:1311327]
Acyp1	chr6	RDG_10min_no_LTP	97.72	115.837	30	30	0	0	0	0	0	0	0	0	acylphosphatase 1 [Source:RGD Symbol;Acc:1311327]
Acyp1	chr6	RDG_60min_no_LTP	135.26	147.844	47	43	4	4	2	2	0	0	2	2	acylphosphatase 1 [Source:RGD Symbol;Acc:1311327]
Acyp2	chr14	LDG_10min_LTP	110.72	119.197	231	222	9	9	5	5	0	0	4	4	acylphosphatase 2 [Source:RGD Symbol;Acc:1595836]
Acyp2	chr14	LDG_60min_LTP	89.79	108.772	196	181	15	30	6	6	7	17	5	7	acylphosphatase 2 [Source:RGD Symbol;Acc:1595836]
Acyp2	chr14	RDG_10min_no_LTP	105.57	117.776	183	173	10	10	2	2	2	2	6	6	acylphosphatase 2 [Source:RGD Symbol;Acc:1595836]
Acyp2	chr14	RDG_60min_no_LTP	108.52	120.253	267	257	10	11	4	4	3	4	3	3	acylphosphatase 2 [Source:RGD Symbol;Acc:1595836]
Ada	chr3	RDG_10min_no_LTP	157.52	157.52	2	2	0	0	0	0	0	0	0	0	adenosine deaminase [Source:RGD Symbol;Acc:2031]
Ada	chr3	RDG_60min_no_LTP	231.84	231.84	1	1	0	0	0	0	0	0	0	0	adenosine deaminase [Source:RGD Symbol;Acc:2031]
Adad1	chr2	RDG_60min_no_LTP	13.54	13.54	1	1	0	0	0	0	0	0	0	0	adenosine deaminase domain containing 1 [Source:RGD Symbol;Acc:1359309]
Adal	chr3	LDG_10min_LTP	140.25	164.435	12	10	2	3	1	1	0	0	1	2	adenosine deaminase-like [Source:RGD Symbol;Acc:1359517]
Adal	chr3	LDG_60min_LTP	211.48	198.305	6	6	0	0	0	0	0	0	0	0	adenosine deaminase-like [Source:RGD Symbol;Acc:1359517]
Adal	chr3	RDG_10min_no_LTP	131.11	140.413	3	3	0	0	0	0	0	0	0	0	adenosine deaminase-like [Source:RGD Symbol;Acc:1359517]
Adal	chr3	RDG_60min_no_LTP	223.08	223.08	1	0	1	1	0	0	1	1	0	0	adenosine deaminase-like [Source:RGD Symbol;Acc:1359517]
Adam10	chr8	LDG_10min_LTP	104.01	109.938	52	51	1	1	0	0	1	1	0	0	ADAM metallopeptidase domain 10 [Source:RGD Symbol;Acc:2032]
Adam10	chr8	LDG_60min_LTP	128.805	129.692	42	42	0	0	0	0	0	0	0	0	ADAM metallopeptidase domain 10 [Source:RGD Symbol;Acc:2032]
Adam10	chr8	RDG_10min_no_LTP	121.8	127.049	46	44	2	3	2	2	0	0	1	1	ADAM metallopeptidase domain 10 [Source:RGD Symbol;Acc:2032]
Adam10	chr8	RDG_60min_no_LTP	130.68	131.019	54	52	2	2	0	0	0	0	2	2	ADAM metallopeptidase domain 10 [Source:RGD Symbol;Acc:2032]
Adam11	chr10	LDG_10min_LTP	129.96	140.415	255	243	12	12	4	4	6	6	2	2	ADAM metallopeptidase domain 11 [Source:RGD Symbol;Acc:1307515]
Adam11	chr10	LDG_60min_LTP	121.305	135.771	228	216	12	15	5	5	4	4	5	6	ADAM metallopeptidase domain 11 [Source:RGD Symbol;Acc:1307515]
Adam11	chr10	RDG_10min_no_LTP	129.865	142.738	210	194	16	20	8	9	7	9	2	2	ADAM metallopeptidase domain 11 [Source:RGD Symbol;Acc:1307515]
Adam11	chr10	RDG_60min_no_LTP	140.38	152.568	336	317	19	21	9	10	5	6	5	5	ADAM metallopeptidase domain 11 [Source:RGD Symbol;Acc:1307515]
Adam12	chr1	LDG_10min_LTP	72.515	72.515	2	2	0	0	0	0	0	0	0	0	ADAM metallopeptidase domain 12 [Source:RGD Symbol;Acc:1583652]
Adam12	chr1	LDG_60min_LTP	131.87	131.87	2	2	0	0	0	0	0	0	0	0	ADAM metallopeptidase domain 12 [Source:RGD Symbol;Acc:1583652]
Adam12	chr1	RDG_60min_no_LTP	206.35	219.413	3	3	0	0	0	0	0	0	0	0	ADAM metallopeptidase domain 12 [Source:RGD Symbol;Acc:1583652]
Adam15	chr2	LDG_10min_LTP	99.545	116.62	102	98	4	4	1	1	2	2	1	1	ADAM metallopeptidase domain 15 [Source:RGD Symbol;Acc:620402]
Adam15	chr2	LDG_60min_LTP	109.27	116.344	85	85	0	0	0	0	0	0	0	0	ADAM metallopeptidase domain 15 [Source:RGD Symbol;Acc:620402]
Adam15	chr2	RDG_10min_no_LTP	107.58	121.046	87	80	7	12	2	3	4	7	2	2	ADAM metallopeptidase domain 15 [Source:RGD Symbol;Acc:620402]
Adam15	chr2	RDG_60min_no_LTP	99.67	115.749	103	96	7	10	3	4	4	4	2	2	ADAM metallopeptidase domain 15 [Source:RGD Symbol;Acc:620402]
Adam17	chr6	LDG_10min_LTP	63.81	92.9855	11	11	0	0	0	0	0	0	0	0	ADAM metallopeptidase domain 17 [Source:RGD Symbol;Acc:620404]
Adam17	chr6	LDG_60min_LTP	107.31	108.1	10	10	0	0	0	0	0	0	0	0	ADAM metallopeptidase domain 17 [Source:RGD Symbol;Acc:620404]
Adam17	chr6	RDG_10min_no_LTP	87.72	95.886	5	5	0	0	0	0	0	0	0	0	ADAM metallopeptidase domain 17 [Source:RGD Symbol;Acc:620404]
Adam17	chr6	RDG_60min_no_LTP	97.37	124.439	14	14	0	0	0	0	0	0	0	0	ADAM metallopeptidase domain 17 [Source:RGD Symbol;Acc:620404]
Adam19	chr10	LDG_10min_LTP	105.04	125.013	19	19	0	0	0	0	0	0	0	0	ADAM metallopeptidase domain 19 [Source:RGD Symbol;Acc:1585017]
Adam19	chr10	LDG_60min_LTP	103.37	126.629	19	18	1	1	0	0	0	0	1	1	ADAM metallopeptidase domain 19 [Source:RGD Symbol;Acc:1585017]
Adam19	chr10	RDG_10min_no_LTP	114.13	116.672	15	14	1	1	0	0	1	1	0	0	ADAM metallopeptidase domain 19 [Source:RGD Symbol;Acc:1585017]
Adam19	chr10	RDG_60min_no_LTP	164.975	171.532	16	16	0	0	0	0	0	0	0	0	ADAM metallopeptidase domain 19 [Source:RGD Symbol;Acc:1585017]
Adam1a	chr12	LDG_10min_LTP	230.8	230.8	1	1	0	0	0	0	0	0	0	0	ADAM metallopeptidase domain 1a [Source:RGD Symbol;Acc:621467]
Adam1a	chr12	LDG_60min_LTP	106.52	96.04	3	3	0	0	0	0	0	0	0	0	ADAM metallopeptidase domain 1a [Source:RGD Symbol;Acc:621467]
Adam1a	chr12	RDG_10min_no_LTP	233.09	233.09	2	2	0	0	0	0	0	0	0	0	ADAM metallopeptidase domain 1a [Source:RGD Symbol;Acc:621467]
Adam1a	chr12	RDG_60min_no_LTP	150.875	144.35	4	4	0	0	0	0	0	0	0	0	ADAM metallopeptidase domain 1a [Source:RGD Symbol;Acc:621467]
Adam2	chr15	LDG_60min_LTP	271.34	271.34	1	1	0	0	0	0	0	0	0	0	ADAM metallopeptidase domain 2 [Source:RGD Symbol;Acc:69299]
Adam22	chr4	LDG_10min_LTP	141.52	150.403	127	124	3	3	1	1	2	2	0	0	ADAM metallopeptidase domain 22 [Source:RGD Symbol;Acc:1585016]
Adam22	chr4	LDG_60min_LTP	127.87	137.627	121	116	5	7	2	2	3	4	1	1	ADAM metallopeptidase domain 22 [Source:RGD Symbol;Acc:1585016]
Adam22	chr4	RDG_10min_no_LTP	148.57	161.727	71	66	5	6	3	3	0	0	3	3	ADAM metallopeptidase domain 22 [Source:RGD Symbol;Acc:1585016]
Adam22	chr4	RDG_60min_no_LTP	151.52	169.511	145	142	3	3	0	0	0	0	3	3	ADAM metallopeptidase domain 22 [Source:RGD Symbol;Acc:1585016]
Adam23	chr9	LDG_10min_LTP	119.595	143.104	28	26	2	2	1	1	1	1	0	0	ADAM metallopeptidase domain 23 [Source:RGD Symbol;Acc:1305739]
Adam23	chr9	LDG_60min_LTP	149.46	154.477	31	27	4	5	2	2	2	3	0	0	ADAM metallopeptidase domain 23 [Source:RGD Symbol;Acc:1305739]
Adam23	chr9	RDG_10min_no_LTP	135.36	150.963	25	23	2	2	1	1	0	0	1	1	ADAM metallopeptidase domain 23 [Source:RGD Symbol;Acc:1305739]
Adam23	chr9	RDG_60min_no_LTP	164.12	160.111	41	38	3	3	0	0	0	0	3	3	ADAM metallopeptidase domain 23 [Source:RGD Symbol;Acc:1305739]
Adam32	chr16	LDG_60min_LTP	36.07	36.07	1	1	0	0	0	0	0	0	0	0	ADAM metallopeptidase domain 32 [Source:RGD Symbol;Acc:735114]
Adam32	chr16	RDG_10min_no_LTP	175.96	175.96	1	1	0	0	0	0	0	0	0	0	ADAM metallopeptidase domain 32 [Source:RGD Symbol;Acc:735114]
Adam4l1	chr6	LDG_60min_LTP	299.945	299.945	2	2	0	0	0	0	0	0	0	0
Adam7	chr15	RDG_10min_no_LTP	73.63	73.63	1	1	0	0	0	0	0	0	0	0	ADAM metallopeptidase domain 7 [Source:RGD Symbol;Acc:62032]
Adam8	chr1	LDG_10min_LTP	293.48	293.48	1	1	0	0	0	0	0	0	0	0	ADAM metallopeptidase domain 8 [Source:RGD Symbol;Acc:1566394]
Adam8	chr1	RDG_60min_no_LTP	15.21	15.21	1	1	0	0	0	0	0	0	0	0	ADAM metallopeptidase domain 8 [Source:RGD Symbol;Acc:1566394]
Adam9	chr16	LDG_10min_LTP	151.735	149.525	30	29	1	1	0	0	0	0	1	1	ADAM metallopeptidase domain 9 [Source:RGD Symbol;Acc:621473]
Adam9	chr16	LDG_60min_LTP	133.87	155.575	32	30	2	2	1	1	0	0	1	1	ADAM metallopeptidase domain 9 [Source:RGD Symbol;Acc:621473]
Adam9	chr16	RDG_10min_no_LTP	148.76	154.366	16	15	1	1	0	0	0	0	1	1	ADAM metallopeptidase domain 9 [Source:RGD Symbol;Acc:621473]
Adam9	chr16	RDG_60min_no_LTP	130.57	151.01	35	34	1	1	0	0	1	1	0	0	ADAM metallopeptidase domain 9 [Source:RGD Symbol;Acc:621473]
Adamts1	chr11	LDG_10min_LTP	126.92	119.162	13	12	1	1	0	0	1	1	0	0	ADAM metallopeptidase with thrombospondin type 1 motif, 1 [Source:RGD Symbol;Acc:621241]
Adamts1	chr11	LDG_60min_LTP	61.83	94.132	5	4	1	1	0	0	1	1	0	0	ADAM metallopeptidase with thrombospondin type 1 motif, 1 [Source:RGD Symbol;Acc:621241]
Adamts1	chr11	RDG_10min_no_LTP	140.21	140.21	1	1	0	0	0	0	0	0	0	0	ADAM metallopeptidase with thrombospondin type 1 motif, 1 [Source:RGD Symbol;Acc:621241]
Adamts1	chr11	RDG_60min_no_LTP	240.445	240.445	2	2	0	0	0	0	0	0	0	0	ADAM metallopeptidase with thrombospondin type 1 motif, 1 [Source:RGD Symbol;Acc:621241]
Adamts10	chr7	LDG_10min_LTP	237.39	217.798	6	5	1	2	0	0	1	2	0	0	ADAM metallopeptidase with thrombospondin type 1 motif, 10 [Source:RGD Symbol;Acc:1598320]
Adamts10	chr7	LDG_60min_LTP	255.28	243.077	8	8	0	0	0	0	0	0	0	0	ADAM metallopeptidase with thrombospondin type 1 motif, 10 [Source:RGD Symbol;Acc:1598320]
Adamts10	chr7	RDG_10min_no_LTP	273.08	261.68	7	7	0	0	0	0	0	0	0	0	ADAM metallopeptidase with thrombospondin type 1 motif, 10 [Source:RGD Symbol;Acc:1598320]
Adamts10	chr7	RDG_60min_no_LTP	336.85	326.97	6	6	0	0	0	0	0	0	0	0	ADAM metallopeptidase with thrombospondin type 1 motif, 10 [Source:RGD Symbol;Acc:1598320]
Adamts12	chr2	LDG_10min_LTP	171.32	171.32	2	2	0	0	0	0	0	0	0	0	ADAM metallopeptidase with thrombospondin type 1 motif, 12 [Source:RGD Symbol;Acc:1307323]
Adamts12	chr2	LDG_60min_LTP	281.39	281.39	1	1	0	0	0	0	0	0	0	0	ADAM metallopeptidase with thrombospondin type 1 motif, 12 [Source:RGD Symbol;Acc:1307323]
Adamts12	chr2	RDG_10min_no_LTP	76	76	1	1	0	0	0	0	0	0	0	0	ADAM metallopeptidase with thrombospondin type 1 motif, 12 [Source:RGD Symbol;Acc:1307323]
Adamts12	chr2	RDG_60min_no_LTP	268.4	268.4	1	1	0	0	0	0	0	0	0	0	ADAM metallopeptidase with thrombospondin type 1 motif, 12 [Source:RGD Symbol;Acc:1307323]
Adamts14	chr20	LDG_10min_LTP	41.21	41.21	1	1	0	0	0	0	0	0	0	0	ADAM metallopeptidase with thrombospondin type 1 motif, 14 [Source:RGD Symbol;Acc:1308899]
Adamts14	chr20	RDG_10min_no_LTP	201.28	201.28	1	1	0	0	0	0	0	0	0	0	ADAM metallopeptidase with thrombospondin type 1 motif, 14 [Source:RGD Symbol;Acc:1308899]
Adamts14	chr20	RDG_60min_no_LTP	74.275	74.275	2	2	0	0	0	0	0	0	0	0	ADAM metallopeptidase with thrombospondin type 1 motif, 14 [Source:RGD Symbol;Acc:1308899]
Adamts15	chr8	LDG_10min_LTP	161.595	161.595	2	1	1	4	0	0	1	4	0	0	ADAM metallopeptidase with thrombospondin type 1 motif, 15 [Source:RGD Symbol;Acc:1309770]
Adamts15	chr8	RDG_10min_no_LTP	74	74	2	2	0	0	0	0	0	0	0	0	ADAM metallopeptidase with thrombospondin type 1 motif, 15 [Source:RGD Symbol;Acc:1309770]
Adamts15	chr8	RDG_60min_no_LTP	229.6	180.277	3	2	1	1	0	0	1	1	0	0	ADAM metallopeptidase with thrombospondin type 1 motif, 15 [Source:RGD Symbol;Acc:1309770]
Adamts17	chr1	LDG_10min_LTP	70.12	89.56	9	9	0	0	0	0	0	0	0	0	ADAM metallopeptidase with thrombospondin type 1 motif, 17 [Source:RGD Symbol;Acc:1308783]
Adamts17	chr1	LDG_60min_LTP	77.875	97.705	4	3	1	1	0	0	1	1	0	0	ADAM metallopeptidase with thrombospondin type 1 motif, 17 [Source:RGD Symbol;Acc:1308783]
Adamts17	chr1	RDG_10min_no_LTP	95.6	121.98	3	3	0	0	0	0	0	0	0	0	ADAM metallopeptidase with thrombospondin type 1 motif, 17 [Source:RGD Symbol;Acc:1308783]
Adamts17	chr1	RDG_60min_no_LTP	151.14	125.1	13	12	1	1	0	0	1	1	0	0	ADAM metallopeptidase with thrombospondin type 1 motif, 17 [Source:RGD Symbol;Acc:1308783]
Adamts18	chr19	LDG_10min_LTP	51.955	67.675	4	4	0	0	0	0	0	0	0	0	ADAM metallopeptidase with thrombospondin type 1 motif, 18 [Source:RGD Symbol;Acc:1560118]
Adamts18	chr19	LDG_60min_LTP	183.92	183.92	2	2	0	0	0	0	0	0	0	0	ADAM metallopeptidase with thrombospondin type 1 motif, 18 [Source:RGD Symbol;Acc:1560118]
Adamts18	chr19	RDG_60min_no_LTP	251	251	1	1	0	0	0	0	0	0	0	0	ADAM metallopeptidase with thrombospondin type 1 motif, 18 [Source:RGD Symbol;Acc:1560118]
Adamts19	chr18	LDG_10min_LTP	277.6	277.6	1	1	0	0	0	0	0	0	0	0	ADAM metallopeptidase with thrombospondin type 1 motif, 19 [Source:RGD Symbol;Acc:1308359]
Adamts19	chr18	LDG_60min_LTP	171.745	171.745	2	2	0	0	0	0	0	0	0	0	ADAM metallopeptidase with thrombospondin type 1 motif, 19 [Source:RGD Symbol;Acc:1308359]
Adamts19	chr18	RDG_10min_no_LTP	43.62	43.62	1	1	0	0	0	0	0	0	0	0	ADAM metallopeptidase with thrombospondin type 1 motif, 19 [Source:RGD Symbol;Acc:1308359]
Adamts19	chr18	RDG_60min_no_LTP	261.73	187.763	3	3	0	0	0	0	0	0	0	0	ADAM metallopeptidase with thrombospondin type 1 motif, 19 [Source:RGD Symbol;Acc:1308359]
Adamts2	chr10	LDG_10min_LTP	104.995	98.9775	4	4	0	0	0	0	0	0	0	0	ADAM metallopeptidase with thrombospondin type 1 motif, 2 [Source:RGD Symbol;Acc:1565950]
Adamts2	chr10	LDG_60min_LTP	237.83	199.727	3	3	0	0	0	0	0	0	0	0	ADAM metallopeptidase with thrombospondin type 1 motif, 2 [Source:RGD Symbol;Acc:1565950]
Adamts2	chr10	RDG_10min_no_LTP	89.92	85.986	5	5	0	0	0	0	0	0	0	0	ADAM metallopeptidase with thrombospondin type 1 motif, 2 [Source:RGD Symbol;Acc:1565950]
Adamts2	chr10	RDG_60min_no_LTP	217.335	190.948	10	10	0	0	0	0	0	0	0	0	ADAM metallopeptidase with thrombospondin type 1 motif, 2 [Source:RGD Symbol;Acc:1565950]
Adamts20	chr7	LDG_10min_LTP	182.685	180.318	6	6	0	0	0	0	0	0	0	0	ADAM metallopeptidase with thrombospondin type 1 motif, 20 [Source:RGD Symbol;Acc:1307725]
Adamts20	chr7	LDG_60min_LTP	196.48	196.48	1	1	0	0	0	0	0	0	0	0	ADAM metallopeptidase with thrombospondin type 1 motif, 20 [Source:RGD Symbol;Acc:1307725]
Adamts20	chr7	RDG_10min_no_LTP	147.18	147.18	2	2	0	0	0	0	0	0	0	0	ADAM metallopeptidase with thrombospondin type 1 motif, 20 [Source:RGD Symbol;Acc:1307725]
Adamts20	chr7	RDG_60min_no_LTP	212.08	206.999	11	10	1	1	1	1	0	0	0	0	ADAM metallopeptidase with thrombospondin type 1 motif, 20 [Source:RGD Symbol;Acc:1307725]
Adamts3	chr14	LDG_10min_LTP	129.29	154.892	29	20	9	16	3	3	2	4	4	9	ADAM metallopeptidase with thrombospondin type 1, motif 3 [Source:RGD Symbol;Acc:1310750]
Adamts3	chr14	LDG_60min_LTP	134.83	145.174	21	13	8	10	1	2	3	4	4	4	ADAM metallopeptidase with thrombospondin type 1, motif 3 [Source:RGD Symbol;Acc:1310750]
Adamts3	chr14	RDG_10min_no_LTP	198.65	173.175	11	7	4	6	1	1	2	2	1	3	ADAM metallopeptidase with thrombospondin type 1, motif 3 [Source:RGD Symbol;Acc:1310750]
Adamts3	chr14	RDG_60min_no_LTP	201.12	197.758	25	16	9	12	4	4	0	0	5	8	ADAM metallopeptidase with thrombospondin type 1, motif 3 [Source:RGD Symbol;Acc:1310750]
Adamts4	chr13	LDG_10min_LTP	69.37	105.402	9	9	0	0	0	0	0	0	0	0	ADAM metallopeptidase with thrombospondin type 1 motif, 4 [Source:RGD Symbol;Acc:621242]
Adamts4	chr13	LDG_60min_LTP	74.28	67.81	6	5	1	1	1	1	0	0	0	0	ADAM metallopeptidase with thrombospondin type 1 motif, 4 [Source:RGD Symbol;Acc:621242]
Adamts4	chr13	RDG_10min_no_LTP	96.92	132.85	7	7	0	0	0	0	0	0	0	0	ADAM metallopeptidase with thrombospondin type 1 motif, 4 [Source:RGD Symbol;Acc:621242]
Adamts4	chr13	RDG_60min_no_LTP	74.47	85.6644	9	8	1	1	0	0	1	1	0	0	ADAM metallopeptidase with thrombospondin type 1 motif, 4 [Source:RGD Symbol;Acc:621242]
Adamts5	chr11	RDG_10min_no_LTP	60.27	60.27	1	1	0	0	0	0	0	0	0	0	ADAM metallopeptidase with thrombospondin type 1 motif, 5 [Source:RGD Symbol;Acc:735196]
Adamts5	chr11	RDG_60min_no_LTP	107.93	107.93	1	0	1	1	0	0	0	0	1	1	ADAM metallopeptidase with thrombospondin type 1 motif, 5 [Source:RGD Symbol;Acc:735196]
Adamts6	chr2	LDG_60min_LTP	174.61	174.61	1	1	0	0	0	0	0	0	0	0	ADAM metallopeptidase with thrombospondin type 1 motif, 6 [Source:RGD Symbol;Acc:1307678]
Adamts6	chr2	RDG_10min_no_LTP	205.48	158.907	3	3	0	0	0	0	0	0	0	0	ADAM metallopeptidase with thrombospondin type 1 motif, 6 [Source:RGD Symbol;Acc:1307678]
Adamts6	chr2	RDG_60min_no_LTP	273.17	273.17	1	1	0	0	0	0	0	0	0	0	ADAM metallopeptidase with thrombospondin type 1 motif, 6 [Source:RGD Symbol;Acc:1307678]
Adamts7	chr8	RDG_10min_no_LTP	175.44	175.44	1	1	0	0	0	0	0	0	0	0	ADAM metallopeptidase with thrombospondin type 1 motif, 7 [Source:RGD Symbol;Acc:1306713]
Adamts8	chr8	LDG_10min_LTP	68.23	101.733	3	3	0	0	0	0	0	0	0	0	ADAM metallopeptidase with thrombospondin type 1 motif, 8 [Source:RGD Symbol;Acc:1308511]
Adamts8	chr8	LDG_60min_LTP	30.96	30.96	1	1	0	0	0	0	0	0	0	0	ADAM metallopeptidase with thrombospondin type 1 motif, 8 [Source:RGD Symbol;Acc:1308511]
Adamts8	chr8	RDG_10min_no_LTP	103.42	103.42	1	1	0	0	0	0	0	0	0	0	ADAM metallopeptidase with thrombospondin type 1 motif, 8 [Source:RGD Symbol;Acc:1308511]
Adamts9	chr4	LDG_10min_LTP	215.83	196.28	5	4	1	1	0	0	1	1	0	0	ADAM metallopeptidase with thrombospondin type 1 motif, 9 [Source:RGD Symbol;Acc:1306889]
Adamts9	chr4	LDG_60min_LTP	135.93	133.672	5	4	1	1	1	1	0	0	0	0	ADAM metallopeptidase with thrombospondin type 1 motif, 9 [Source:RGD Symbol;Acc:1306889]
Adamts9	chr4	RDG_10min_no_LTP	159.36	172.846	5	5	0	0	0	0	0	0	0	0	ADAM metallopeptidase with thrombospondin type 1 motif, 9 [Source:RGD Symbol;Acc:1306889]
Adamts9	chr4	RDG_60min_no_LTP	129.205	118.61	10	10	0	0	0	0	0	0	0	0	ADAM metallopeptidase with thrombospondin type 1 motif, 9 [Source:RGD Symbol;Acc:1306889]
Adamtsl1	chr5	LDG_10min_LTP	137.58	133.147	6	6	0	0	0	0	0	0	0	0	ADAMTS-like 1 [Source:RGD Symbol;Acc:1306439]
Adamtsl1	chr5	LDG_60min_LTP	196.065	196.065	2	2	0	0	0	0	0	0	0	0	ADAMTS-like 1 [Source:RGD Symbol;Acc:1306439]
Adamtsl1	chr5	RDG_10min_no_LTP	145.485	143.864	8	6	2	2	0	0	1	1	1	1	ADAMTS-like 1 [Source:RGD Symbol;Acc:1306439]
Adamtsl1	chr5	RDG_60min_no_LTP	118.65	145.623	4	4	0	0	0	0	0	0	0	0	ADAMTS-like 1 [Source:RGD Symbol;Acc:1306439]
Adamtsl2	chr3	LDG_10min_LTP	99.76	75.3533	3	3	0	0	0	0	0	0	0	0	ADAMTS-like 2 [Source:RGD Symbol;Acc:1305459]
Adamtsl2	chr3	LDG_60min_LTP	41.03	47.0133	3	3	0	0	0	0	0	0	0	0	ADAMTS-like 2 [Source:RGD Symbol;Acc:1305459]
Adamtsl2	chr3	RDG_10min_no_LTP	185.89	185.89	1	1	0	0	0	0	0	0	0	0	ADAMTS-like 2 [Source:RGD Symbol;Acc:1305459]
Adamtsl2	chr3	RDG_60min_no_LTP	109.39	132.042	6	6	0	0	0	0	0	0	0	0	ADAMTS-like 2 [Source:RGD Symbol;Acc:1305459]
Adamtsl3	chr1	LDG_10min_LTP	34.735	34.735	2	2	0	0	0	0	0	0	0	0	ADAMTS-like 3 [Source:RGD Symbol;Acc:1305155]
Adamtsl3	chr1	LDG_60min_LTP	177.64	177.64	1	1	0	0	0	0	0	0	0	0	ADAMTS-like 3 [Source:RGD Symbol;Acc:1305155]
Adamtsl3	chr1	RDG_10min_no_LTP	133.23	133.23	2	1	1	1	0	0	1	1	0	0	ADAMTS-like 3 [Source:RGD Symbol;Acc:1305155]
Adamtsl3	chr1	RDG_60min_no_LTP	114.79	110.358	5	4	1	1	1	1	0	0	0	0	ADAMTS-like 3 [Source:RGD Symbol;Acc:1305155]
Adamtsl4	chr2	LDG_60min_LTP	11.3	11.3	1	1	0	0	0	0	0	0	0	0	ADAMTS-like 4 [Source:RGD Symbol;Acc:1561012]
Adamtsl5	chr7	LDG_10min_LTP	329.5	329.5	1	1	0	0	0	0	0	0	0	0	ADAMTS-like 5 [Source:RGD Symbol;Acc:1305607]
Adamtsl5	chr7	LDG_60min_LTP	96.43	96.43	1	1	0	0	0	0	0	0	0	0	ADAMTS-like 5 [Source:RGD Symbol;Acc:1305607]
Adamtsl5	chr7	RDG_10min_no_LTP	332.15	332.15	1	1	0	0	0	0	0	0	0	0	ADAMTS-like 5 [Source:RGD Symbol;Acc:1305607]
Adamtsl5	chr7	RDG_60min_no_LTP	113.54	113.54	1	0	1	1	0	0	0	0	1	1	ADAMTS-like 5 [Source:RGD Symbol;Acc:1305607]
Adap1	chr12	LDG_10min_LTP	111.64	123.941	169	159	10	10	2	2	4	4	4	4	ArfGAP with dual PH domains 1 [Source:RGD Symbol;Acc:621418]
Adap1	chr12	LDG_60min_LTP	104.995	114.369	172	161	11	17	5	6	6	8	2	3	ArfGAP with dual PH domains 1 [Source:RGD Symbol;Acc:621418]
Adap1	chr12	RDG_10min_no_LTP	100.14	112.713	162	148	14	19	4	4	6	10	5	5	ArfGAP with dual PH domains 1 [Source:RGD Symbol;Acc:621418]
Adap1	chr12	RDG_60min_no_LTP	105.04	115.17	197	188	9	14	0	0	6	9	4	5	ArfGAP with dual PH domains 1 [Source:RGD Symbol;Acc:621418]
Adap2	chr10	LDG_10min_LTP	151.94	151.94	2	2	0	0	0	0	0	0	0	0	ArfGAP with dual PH domains 2 [Source:RGD Symbol;Acc:708487]
Adap2	chr10	LDG_60min_LTP	116	116	1	1	0	0	0	0	0	0	0	0	ArfGAP with dual PH domains 2 [Source:RGD Symbol;Acc:708487]
Adap2	chr10	RDG_10min_no_LTP	87.26	87.26	2	2	0	0	0	0	0	0	0	0	ArfGAP with dual PH domains 2 [Source:RGD Symbol;Acc:708487]
Adap2	chr10	RDG_60min_no_LTP	155.87	155.87	2	1	1	1	1	1	0	0	0	0	ArfGAP with dual PH domains 2 [Source:RGD Symbol;Acc:708487]
Adar	chr2	LDG_10min_LTP	133.65	136.353	104	99	5	5	3	3	0	0	2	2	adenosine deaminase, RNA-specific [Source:RGD Symbol;Acc:71099]
Adar	chr2	LDG_60min_LTP	114.945	136.253	90	88	2	3	1	1	1	2	0	0	adenosine deaminase, RNA-specific [Source:RGD Symbol;Acc:71099]
Adar	chr2	RDG_10min_no_LTP	144.64	144.355	73	72	1	1	0	0	1	1	0	0	adenosine deaminase, RNA-specific [Source:RGD Symbol;Acc:71099]
Adar	chr2	RDG_60min_no_LTP	126.31	134.104	153	148	5	5	3	3	1	1	1	1	adenosine deaminase, RNA-specific [Source:RGD Symbol;Acc:71099]
Adarb1	chr20	LDG_10min_LTP	125.045	136.439	162	154	8	9	5	5	2	3	1	1	adenosine deaminase, RNA-specific, B1 [Source:RGD Symbol;Acc:2033]
Adarb1	chr20	LDG_60min_LTP	136.74	141.672	123	118	5	8	2	4	3	3	1	1	adenosine deaminase, RNA-specific, B1 [Source:RGD Symbol;Acc:2033]
Adarb1	chr20	RDG_10min_no_LTP	134.385	146.88	94	92	2	2	0	0	0	0	2	2	adenosine deaminase, RNA-specific, B1 [Source:RGD Symbol;Acc:2033]
Adarb1	chr20	RDG_60min_no_LTP	153.8	163.053	154	146	8	9	3	3	4	4	2	2	adenosine deaminase, RNA-specific, B1 [Source:RGD Symbol;Acc:2033]
Adarb2	chr17	LDG_10min_LTP	125.84	127.004	14	13	1	1	0	0	0	0	1	1	adenosine deaminase, RNA-specific, B2 [Source:RGD Symbol;Acc:621519]
Adarb2	chr17	LDG_60min_LTP	186.325	175.244	22	21	1	1	1	1	0	0	0	0	adenosine deaminase, RNA-specific, B2 [Source:RGD Symbol;Acc:621519]
Adarb2	chr17	RDG_10min_no_LTP	167.255	148.058	24	24	0	0	0	0	0	0	0	0	adenosine deaminase, RNA-specific, B2 [Source:RGD Symbol;Acc:621519]
Adarb2	chr17	RDG_60min_no_LTP	124.85	146.874	30	29	1	1	0	0	0	0	1	1	adenosine deaminase, RNA-specific, B2 [Source:RGD Symbol;Acc:621519]
Adat1	chr19	LDG_10min_LTP	192.73	192.73	2	2	0	0	0	0	0	0	0	0	adenosine deaminase, tRNA-specific 1 [Source:RGD Symbol;Acc:1591020]
Adat1	chr19	LDG_60min_LTP	174.995	174.995	2	2	0	0	0	0	0	0	0	0	adenosine deaminase, tRNA-specific 1 [Source:RGD Symbol;Acc:1591020]
Adat1	chr19	RDG_10min_no_LTP	13.07	13.07	1	1	0	0	0	0	0	0	0	0	adenosine deaminase, tRNA-specific 1 [Source:RGD Symbol;Acc:1591020]
Adat1	chr19	RDG_60min_no_LTP	20.8	20.8	2	2	0	0	0	0	0	0	0	0	adenosine deaminase, tRNA-specific 1 [Source:RGD Symbol;Acc:1591020]
Adat2	chr1	LDG_10min_LTP	113.91	133.726	13	13	0	0	0	0	0	0	0	0	adenosine deaminase, tRNA-specific 2 [Source:RGD Symbol;Acc:1309642]
Adat2	chr1	LDG_60min_LTP	68.48	94.3846	13	10	3	5	0	0	2	4	1	1	adenosine deaminase, tRNA-specific 2 [Source:RGD Symbol;Acc:1309642]
Adat2	chr1	RDG_10min_no_LTP	132.8	131.433	9	8	1	1	1	1	0	0	0	0	adenosine deaminase, tRNA-specific 2 [Source:RGD Symbol;Acc:1309642]
Adat2	chr1	RDG_60min_no_LTP	165.96	156.106	11	11	0	0	0	0	0	0	0	0	adenosine deaminase, tRNA-specific 2 [Source:RGD Symbol;Acc:1309642]
Adat3	chr7	LDG_10min_LTP	67.92	93.6633	3	3	0	0	0	0	0	0	0	0	adenosine deaminase, tRNA-specific 3 [Source:RGD Symbol;Acc:1642417]
Adat3	chr7	LDG_60min_LTP	150.62	139.863	3	3	0	0	0	0	0	0	0	0	adenosine deaminase, tRNA-specific 3 [Source:RGD Symbol;Acc:1642417]
Adat3	chr7	RDG_60min_no_LTP	116.39	116.39	1	1	0	0	0	0	0	0	0	0	adenosine deaminase, tRNA-specific 3 [Source:RGD Symbol;Acc:1642417]
Adck1	chr6	LDG_10min_LTP	70.93	91.2532	25	24	1	1	0	0	1	1	0	0	aarF domain containing kinase 1 [Source:RGD Symbol;Acc:1308263]
Adck1	chr6	LDG_60min_LTP	71.82	99.8929	28	28	0	0	0	0	0	0	0	0	aarF domain containing kinase 1 [Source:RGD Symbol;Acc:1308263]
Adck1	chr6	RDG_10min_no_LTP	103.22	116.006	23	23	0	0	0	0	0	0	0	0	aarF domain containing kinase 1 [Source:RGD Symbol;Acc:1308263]
Adck1	chr6	RDG_60min_no_LTP	108.48	121.95	27	26	1	1	1	1	0	0	0	0	aarF domain containing kinase 1 [Source:RGD Symbol;Acc:1308263]
Adck2	chr4	LDG_10min_LTP	89.985	106.162	20	20	0	0	0	0	0	0	0	0
Adck2	chr4	LDG_60min_LTP	78.175	115.637	26	23	3	3	2	2	1	1	0	0
Adck2	chr4	RDG_10min_no_LTP	89.89	108.58	23	23	0	0	0	0	0	0	0	0
Adck2	chr4	RDG_60min_no_LTP	70.585	110.818	24	23	1	1	1	1	0	0	0	0
Adck5	chr7	LDG_10min_LTP	71.4	96.7252	23	22	1	1	1	1	0	0	0	0	aarF domain containing kinase 5 [Source:RGD Symbol;Acc:1305504]
Adck5	chr7	LDG_60min_LTP	152.91	128.652	23	22	1	1	1	1	0	0	0	0	aarF domain containing kinase 5 [Source:RGD Symbol;Acc:1305504]
Adck5	chr7	RDG_10min_no_LTP	111.52	115.417	27	26	1	1	1	1	0	0	0	0	aarF domain containing kinase 5 [Source:RGD Symbol;Acc:1305504]
Adck5	chr7	RDG_60min_no_LTP	169.47	167.286	35	33	2	2	0	0	1	1	1	1	aarF domain containing kinase 5 [Source:RGD Symbol;Acc:1305504]
Adcy1	chr14	LDG_10min_LTP	109.42	137.652	23	21	2	4	2	2	0	0	1	2	adenylate cyclase 1 [Source:RGD Symbol;Acc:1309318]
Adcy1	chr14	LDG_60min_LTP	84.2	100.152	15	14	1	1	1	1	0	0	0	0	adenylate cyclase 1 [Source:RGD Symbol;Acc:1309318]
Adcy1	chr14	RDG_10min_no_LTP	124.9	126.192	10	10	0	0	0	0	0	0	0	0	adenylate cyclase 1 [Source:RGD Symbol;Acc:1309318]
Adcy1	chr14	RDG_60min_no_LTP	129.71	138.842	15	14	1	2	0	0	1	1	1	1	adenylate cyclase 1 [Source:RGD Symbol;Acc:1309318]
Adcy10	chr13	LDG_60min_LTP	49.93	49.93	1	1	0	0	0	0	0	0	0	0	adenylate cyclase 10 [Source:RGD Symbol;Acc:708450]
Adcy10	chr13	RDG_10min_no_LTP	168	168	1	1	0	0	0	0	0	0	0	0	adenylate cyclase 10 [Source:RGD Symbol;Acc:708450]
Adcy10	chr13	RDG_60min_no_LTP	26.81	26.81	1	1	0	0	0	0	0	0	0	0	adenylate cyclase 10 [Source:RGD Symbol;Acc:708450]
Adcy2	chr1	LDG_10min_LTP	100.72	110.947	129	126	3	3	3	3	0	0	0	0	adenylate cyclase 2 [Source:RGD Symbol;Acc:619965]
Adcy2	chr1	LDG_60min_LTP	106.68	114.635	119	115	4	4	2	2	1	1	1	1	adenylate cyclase 2 [Source:RGD Symbol;Acc:619965]
Adcy2	chr1	RDG_10min_no_LTP	98	107.573	113	110	3	3	2	2	0	0	1	1	adenylate cyclase 2 [Source:RGD Symbol;Acc:619965]
Adcy2	chr1	RDG_60min_no_LTP	89.075	105.347	148	143	5	14	4	4	1	8	1	2	adenylate cyclase 2 [Source:RGD Symbol;Acc:619965]
Adcy3	chr6	LDG_10min_LTP	105.115	118.624	74	71	3	3	1	1	2	2	0	0	adenylate cyclase 3 [Source:RGD Symbol;Acc:71009]
Adcy3	chr6	LDG_60min_LTP	91.4	102.939	59	57	2	2	1	1	0	0	1	1	adenylate cyclase 3 [Source:RGD Symbol;Acc:71009]
Adcy3	chr6	RDG_10min_no_LTP	91.835	99.3553	62	61	1	1	0	0	1	1	0	0	adenylate cyclase 3 [Source:RGD Symbol;Acc:71009]
Adcy3	chr6	RDG_60min_no_LTP	112.795	117.23	92	89	3	3	1	1	1	1	1	1	adenylate cyclase 3 [Source:RGD Symbol;Acc:71009]
Adcy4	chr15	RDG_60min_no_LTP	129.535	129.535	2	2	0	0	0	0	0	0	0	0	adenylate cyclase 4 [Source:RGD Symbol;Acc:2034]
Adcy5	chr11	LDG_10min_LTP	85.075	105.132	56	53	3	3	2	2	0	0	1	1	adenylate cyclase 5 [Source:RGD Symbol;Acc:71014]
Adcy5	chr11	LDG_60min_LTP	91.7	106.566	47	47	0	0	0	0	0	0	0	0	adenylate cyclase 5 [Source:RGD Symbol;Acc:71014]
Adcy5	chr11	RDG_10min_no_LTP	101.69	108.297	54	54	0	0	0	0	0	0	0	0	adenylate cyclase 5 [Source:RGD Symbol;Acc:71014]
Adcy5	chr11	RDG_60min_no_LTP	108.015	118.127	86	81	5	6	2	3	1	1	2	2	adenylate cyclase 5 [Source:RGD Symbol;Acc:71014]
Adcy6	chr7	LDG_10min_LTP	89.17	113.827	29	27	2	2	2	2	0	0	0	0	adenylate cyclase 6 [Source:RGD Symbol;Acc:2035]
Adcy6	chr7	LDG_60min_LTP	117.835	143.646	14	13	1	1	0	0	0	0	1	1	adenylate cyclase 6 [Source:RGD Symbol;Acc:2035]
Adcy6	chr7	RDG_10min_no_LTP	148.615	145.825	22	21	1	1	1	1	0	0	0	0	adenylate cyclase 6 [Source:RGD Symbol;Acc:2035]
Adcy6	chr7	RDG_60min_no_LTP	84.61	123.088	31	31	0	0	0	0	0	0	0	0	adenylate cyclase 6 [Source:RGD Symbol;Acc:2035]
Adcy7	chr19	RDG_10min_no_LTP	103.8	119.53	5	5	0	0	0	0	0	0	0	0	adenylate cyclase 7 [Source:RGD Symbol;Acc:619966]
Adcy7	chr19	RDG_60min_no_LTP	36.76	36.76	1	1	0	0	0	0	0	0	0	0	adenylate cyclase 7 [Source:RGD Symbol;Acc:619966]
Adcy8	chr7	LDG_10min_LTP	165.095	132.637	6	6	0	0	0	0	0	0	0	0	adenylate cyclase 8 [Source:RGD Symbol;Acc:2036]
Adcy8	chr7	LDG_60min_LTP	118.92	137.133	9	9	0	0	0	0	0	0	0	0	adenylate cyclase 8 [Source:RGD Symbol;Acc:2036]
Adcy8	chr7	RDG_10min_no_LTP	33.46	31.684	5	5	0	0	0	0	0	0	0	0	adenylate cyclase 8 [Source:RGD Symbol;Acc:2036]
Adcy8	chr7	RDG_60min_no_LTP	126.52	94.3611	9	8	1	1	1	1	0	0	0	0	adenylate cyclase 8 [Source:RGD Symbol;Acc:2036]
Adcy9	chr10	LDG_10min_LTP	115.1	125.717	127	122	5	6	3	3	1	1	2	2	adenylate cyclase 9 [Source:RGD Symbol;Acc:1304747]
Adcy9	chr10	LDG_60min_LTP	129.3	133.329	89	86	3	4	1	2	0	0	2	2	adenylate cyclase 9 [Source:RGD Symbol;Acc:1304747]
Adcy9	chr10	RDG_10min_no_LTP	136.91	129.01	97	92	5	5	3	3	0	0	2	2	adenylate cyclase 9 [Source:RGD Symbol;Acc:1304747]
Adcy9	chr10	RDG_60min_no_LTP	125.93	132.575	179	173	6	8	3	4	1	1	2	3	adenylate cyclase 9 [Source:RGD Symbol;Acc:1304747]
Adcyap1	chr9	LDG_10min_LTP	117.445	138.793	22	21	1	1	1	1	0	0	0	0	adenylate cyclase activating polypeptide 1 [Source:RGD Symbol;Acc:2037]
Adcyap1	chr9	LDG_60min_LTP	107.93	111.585	23	22	1	1	0	0	1	1	0	0	adenylate cyclase activating polypeptide 1 [Source:RGD Symbol;Acc:2037]
Adcyap1	chr9	RDG_10min_no_LTP	87.42	100.641	27	25	2	2	1	1	1	1	0	0	adenylate cyclase activating polypeptide 1 [Source:RGD Symbol;Acc:2037]
Adcyap1	chr9	RDG_60min_no_LTP	89.9	109.393	30	29	1	1	1	1	0	0	0	0	adenylate cyclase activating polypeptide 1 [Source:RGD Symbol;Acc:2037]
Adcyap1r1	chr4	LDG_10min_LTP	106.94	116.756	176	172	4	4	2	2	1	1	1	1	ADCYAP receptor type I [Source:RGD Symbol;Acc:2038]
Adcyap1r1	chr4	LDG_60min_LTP	121.95	123.26	140	139	1	2	0	0	1	2	0	0	ADCYAP receptor type I [Source:RGD Symbol;Acc:2038]
Adcyap1r1	chr4	RDG_10min_no_LTP	101.175	110.646	138	129	9	11	4	4	5	7	0	0	ADCYAP receptor type I [Source:RGD Symbol;Acc:2038]
Adcyap1r1	chr4	RDG_60min_no_LTP	121.87	121.62	219	216	3	3	0	0	1	1	2	2	ADCYAP receptor type I [Source:RGD Symbol;Acc:2038]
Add1	chr14	LDG_10min_LTP	87.72	96.8166	395	384	11	11	4	4	3	3	4	4	adducin 1 [Source:RGD Symbol;Acc:2041]
Add1	chr14	LDG_60min_LTP	89.59	99.4661	294	282	12	13	7	7	1	1	4	5	adducin 1 [Source:RGD Symbol;Acc:2041]
Add1	chr14	RDG_10min_no_LTP	91.24	106.234	310	296	14	15	6	6	5	6	3	3	adducin 1 [Source:RGD Symbol;Acc:2041]
Add1	chr14	RDG_60min_no_LTP	96.17	107.468	431	419	12	15	5	6	4	4	4	5	adducin 1 [Source:RGD Symbol;Acc:2041]
Add2	chr4	LDG_10min_LTP	112.84	123.556	33	32	1	1	0	0	1	1	0	0	adducin 2 [Source:RGD Symbol;Acc:2042]
Add2	chr4	LDG_60min_LTP	112.03	111.655	25	24	1	1	1	1	0	0	0	0	adducin 2 [Source:RGD Symbol;Acc:2042]
Add2	chr4	RDG_10min_no_LTP	135.545	128.751	10	10	0	0	0	0	0	0	0	0	adducin 2 [Source:RGD Symbol;Acc:2042]
Add2	chr4	RDG_60min_no_LTP	91	118.907	27	27	0	0	0	0	0	0	0	0	adducin 2 [Source:RGD Symbol;Acc:2042]
Add3	chr1	LDG_10min_LTP	103.64	113.756	133	130	3	3	1	1	1	1	1	1	adducin 3 [Source:RGD Symbol;Acc:2043]
Add3	chr1	LDG_60min_LTP	89.3	109.92	131	131	0	0	0	0	0	0	0	0	adducin 3 [Source:RGD Symbol;Acc:2043]
Add3	chr1	RDG_10min_no_LTP	114.645	119.381	104	101	3	3	2	2	0	0	1	1	adducin 3 [Source:RGD Symbol;Acc:2043]
Add3	chr1	RDG_60min_no_LTP	97.11	112.48	151	147	4	4	1	1	1	1	2	2	adducin 3 [Source:RGD Symbol;Acc:2043]
Adgra1	chr1	LDG_10min_LTP	110.82	116.141	53	53	0	0	0	0	0	0	0	0	adhesion G protein-coupled receptor A1 [Source:RGD Symbol;Acc:1308241]
Adgra1	chr1	LDG_60min_LTP	108.03	112.843	24	23	1	1	0	0	0	0	1	1	adhesion G protein-coupled receptor A1 [Source:RGD Symbol;Acc:1308241]
Adgra1	chr1	RDG_10min_no_LTP	78.545	103.783	40	37	3	4	2	2	0	0	2	2	adhesion G protein-coupled receptor A1 [Source:RGD Symbol;Acc:1308241]
Adgra1	chr1	RDG_60min_no_LTP	100.58	105.75	63	60	3	3	0	0	1	1	2	2	adhesion G protein-coupled receptor A1 [Source:RGD Symbol;Acc:1308241]
Adgra2	chr16	LDG_10min_LTP	82.3	88.9909	23	22	1	1	1	1	0	0	0	0	adhesion G protein-coupled receptor A2 [Source:RGD Symbol;Acc:2323365]
Adgra2	chr16	LDG_60min_LTP	196.97	185.578	26	25	1	2	1	2	0	0	0	0	adhesion G protein-coupled receptor A2 [Source:RGD Symbol;Acc:2323365]
Adgra2	chr16	RDG_10min_no_LTP	109.53	109.674	19	18	1	1	0	0	0	0	1	1	adhesion G protein-coupled receptor A2 [Source:RGD Symbol;Acc:2323365]
Adgra2	chr16	RDG_60min_no_LTP	109.32	126.176	24	23	1	2	1	1	0	0	1	1	adhesion G protein-coupled receptor A2 [Source:RGD Symbol;Acc:2323365]
Adgra3	chr14	LDG_10min_LTP	128.84	126.692	18	17	1	2	0	0	1	2	0	0	adhesion G protein-coupled receptor A3 [Source:RGD Symbol;Acc:1304914]
Adgra3	chr14	LDG_60min_LTP	91.24	102.165	19	19	0	0	0	0	0	0	0	0	adhesion G protein-coupled receptor A3 [Source:RGD Symbol;Acc:1304914]
Adgra3	chr14	RDG_10min_no_LTP	61.62	79.3478	9	9	0	0	0	0	0	0	0	0	adhesion G protein-coupled receptor A3 [Source:RGD Symbol;Acc:1304914]
Adgra3	chr14	RDG_60min_no_LTP	123.3	129.094	34	34	0	0	0	0	0	0	0	0	adhesion G protein-coupled receptor A3 [Source:RGD Symbol;Acc:1304914]
Adgrb1	chr7	LDG_10min_LTP	113.21	133.541	340	333	7	8	3	3	3	3	2	2	adhesion G protein-coupled receptor B1 [Source:RGD Symbol;Acc:1305608]
Adgrb1	chr7	LDG_60min_LTP	123.45	137.655	333	321	12	12	5	5	4	4	3	3	adhesion G protein-coupled receptor B1 [Source:RGD Symbol;Acc:1305608]
Adgrb1	chr7	RDG_10min_no_LTP	115.42	133.155	261	246	15	17	7	7	6	8	2	2	adhesion G protein-coupled receptor B1 [Source:RGD Symbol;Acc:1305608]
Adgrb1	chr7	RDG_60min_no_LTP	115.975	136.406	368	349	19	19	7	7	4	4	8	8	adhesion G protein-coupled receptor B1 [Source:RGD Symbol;Acc:1305608]
Adgrb2	chr5	LDG_10min_LTP	104.2	118.407	627	605	22	22	11	11	7	7	4	4	adhesion G protein-coupled receptor B2 [Source:RGD Symbol;Acc:1309431]
Adgrb2	chr5	LDG_60min_LTP	105.48	123.934	519	505	14	15	2	2	6	6	6	7	adhesion G protein-coupled receptor B2 [Source:RGD Symbol;Acc:1309431]
Adgrb2	chr5	RDG_10min_no_LTP	109.105	122.408	468	447	21	23	9	9	8	10	4	4	adhesion G protein-coupled receptor B2 [Source:RGD Symbol;Acc:1309431]
Adgrb2	chr5	RDG_60min_no_LTP	111.17	124.725	680	657	23	27	14	17	6	6	4	4	adhesion G protein-coupled receptor B2 [Source:RGD Symbol;Acc:1309431]
Adgrb3	chr9	LDG_10min_LTP	129.48	125.216	75	73	2	3	1	1	1	2	0	0	adhesion G protein-coupled receptor B3 [Source:RGD Symbol;Acc:1309703]
Adgrb3	chr9	LDG_60min_LTP	101.45	121.341	62	62	0	0	0	0	0	0	0	0	adhesion G protein-coupled receptor B3 [Source:RGD Symbol;Acc:1309703]
Adgrb3	chr9	RDG_10min_no_LTP	116.55	127.403	76	73	3	3	2	2	1	1	0	0	adhesion G protein-coupled receptor B3 [Source:RGD Symbol;Acc:1309703]
Adgrb3	chr9	RDG_60min_no_LTP	122.825	129.617	112	111	1	1	1	1	0	0	0	0	adhesion G protein-coupled receptor B3 [Source:RGD Symbol;Acc:1309703]
Adgrd1	chr12	LDG_60min_LTP	72.08	69.8233	3	3	0	0	0	0	0	0	0	0	adhesion G protein-coupled receptor D1 [Source:RGD Symbol;Acc:1594795]
Adgrd1	chr12	RDG_10min_no_LTP	108.925	109.108	4	4	0	0	0	0	0	0	0	0	adhesion G protein-coupled receptor D1 [Source:RGD Symbol;Acc:1594795]
Adgrd1	chr12	RDG_60min_no_LTP	126.64	126.64	1	1	0	0	0	0	0	0	0	0	adhesion G protein-coupled receptor D1 [Source:RGD Symbol;Acc:1594795]
Adgre1	chr9	LDG_10min_LTP	73.91	83.5662	8	8	0	0	0	0	0	0	0	0	adhesion G protein-coupled receptor E1 [Source:RGD Symbol;Acc:1359214]
Adgre1	chr9	LDG_60min_LTP	86.96	87.7157	7	7	0	0	0	0	0	0	0	0	adhesion G protein-coupled receptor E1 [Source:RGD Symbol;Acc:1359214]
Adgre1	chr9	RDG_10min_no_LTP	102.44	107.386	5	5	0	0	0	0	0	0	0	0	adhesion G protein-coupled receptor E1 [Source:RGD Symbol;Acc:1359214]
Adgre1	chr9	RDG_60min_no_LTP	95.56	95.2483	6	6	0	0	0	0	0	0	0	0	adhesion G protein-coupled receptor E1 [Source:RGD Symbol;Acc:1359214]
Adgre4	chr9	LDG_10min_LTP	134.21	134.21	2	2	0	0	0	0	0	0	0	0	adhesion G protein-coupled receptor E4 [Source:RGD Symbol;Acc:1359641]
Adgre4	chr9	LDG_60min_LTP	229.96	229.96	1	1	0	0	0	0	0	0	0	0	adhesion G protein-coupled receptor E4 [Source:RGD Symbol;Acc:1359641]
Adgre4	chr9	RDG_60min_no_LTP	245.54	245.54	1	1	0	0	0	0	0	0	0	0	adhesion G protein-coupled receptor E4 [Source:RGD Symbol;Acc:1359641]
Adgre5	chr19	LDG_10min_LTP	108.46	131.157	3	3	0	0	0	0	0	0	0	0	adhesion G protein-coupled receptor E5 [Source:RGD Symbol;Acc:1305595]
Adgre5	chr19	LDG_60min_LTP	229.22	232.13	3	3	0	0	0	0	0	0	0	0	adhesion G protein-coupled receptor E5 [Source:RGD Symbol;Acc:1305595]
Adgre5	chr19	RDG_10min_no_LTP	101.11	101.11	2	2	0	0	0	0	0	0	0	0	adhesion G protein-coupled receptor E5 [Source:RGD Symbol;Acc:1305595]
Adgre5	chr19	RDG_60min_no_LTP	171.58	156.52	4	3	1	1	0	0	1	1	0	0	adhesion G protein-coupled receptor E5 [Source:RGD Symbol;Acc:1305595]
Adgrf5	chr9	LDG_10min_LTP	81.7	100.46	22	22	0	0	0	0	0	0	0	0	adhesion G protein-coupled receptor F5 [Source:RGD Symbol;Acc:621679]
Adgrf5	chr9	LDG_60min_LTP	126.125	131.14	20	20	0	0	0	0	0	0	0	0	adhesion G protein-coupled receptor F5 [Source:RGD Symbol;Acc:621679]
Adgrf5	chr9	RDG_10min_no_LTP	82.655	78.5743	14	13	1	1	0	0	1	1	0	0	adhesion G protein-coupled receptor F5 [Source:RGD Symbol;Acc:621679]
Adgrf5	chr9	RDG_60min_no_LTP	123.435	115.031	20	19	1	1	0	0	0	0	1	1	adhesion G protein-coupled receptor F5 [Source:RGD Symbol;Acc:621679]
Adgrg1	chr19	LDG_10min_LTP	92.5	95.538	260	252	8	8	1	1	2	2	5	5	adhesion G protein-coupled receptor G1 [Source:RGD Symbol;Acc:628617]
Adgrg1	chr19	LDG_60min_LTP	90.73	94.5892	204	197	7	8	5	6	0	0	2	2	adhesion G protein-coupled receptor G1 [Source:RGD Symbol;Acc:628617]
Adgrg1	chr19	RDG_10min_no_LTP	93.45	101.439	204	199	5	7	2	3	1	1	2	3	adhesion G protein-coupled receptor G1 [Source:RGD Symbol;Acc:628617]
Adgrg1	chr19	RDG_60min_no_LTP	89.32	95.841	261	250	11	12	4	5	3	3	4	4	adhesion G protein-coupled receptor G1 [Source:RGD Symbol;Acc:628617]
Adgrg2	chrX	LDG_10min_LTP	170.2	176.177	3	3	0	0	0	0	0	0	0	0	adhesion G protein-coupled receptor G2 [Source:RGD Symbol;Acc:628618]
Adgrg2	chrX	RDG_10min_no_LTP	127.17	127.17	1	1	0	0	0	0	0	0	0	0	adhesion G protein-coupled receptor G2 [Source:RGD Symbol;Acc:628618]
Adgrg2	chrX	RDG_60min_no_LTP	90.735	90.735	2	2	0	0	0	0	0	0	0	0	adhesion G protein-coupled receptor G2 [Source:RGD Symbol;Acc:628618]
Adgrg3	chr19	LDG_60min_LTP	21.16	21.16	1	1	0	0	0	0	0	0	0	0	adhesion G protein-coupled receptor G3 [Source:RGD Symbol;Acc:1305674]
Adgrg3	chr19	RDG_60min_no_LTP	102.96	102.96	1	1	0	0	0	0	0	0	0	0	adhesion G protein-coupled receptor G3 [Source:RGD Symbol;Acc:1305674]
Adgrg6	chr1	LDG_10min_LTP	81.645	111.01	8	8	0	0	0	0	0	0	0	0	adhesion G protein-coupled receptor G6 [Source:RGD Symbol;Acc:1308551]
Adgrg6	chr1	LDG_60min_LTP	64.67	97.5386	7	7	0	0	0	0	0	0	0	0	adhesion G protein-coupled receptor G6 [Source:RGD Symbol;Acc:1308551]
Adgrg6	chr1	RDG_10min_no_LTP	79.315	115.032	8	7	1	1	0	0	0	0	1	1	adhesion G protein-coupled receptor G6 [Source:RGD Symbol;Acc:1308551]
Adgrg6	chr1	RDG_60min_no_LTP	132.17	138.81	7	7	0	0	0	0	0	0	0	0	adhesion G protein-coupled receptor G6 [Source:RGD Symbol;Acc:1308551]
Adgrl1	chr19	LDG_10min_LTP	108.715	121.137	428	387	41	73	16	19	22	34	16	20	adhesion G protein-coupled receptor L1 [Source:RGD Symbol;Acc:620768]
Adgrl1	chr19	LDG_60min_LTP	98.48	116.035	367	340	27	44	11	11	15	23	7	10	adhesion G protein-coupled receptor L1 [Source:RGD Symbol;Acc:620768]
Adgrl1	chr19	RDG_10min_no_LTP	97.77	116.743	316	291	25	39	6	7	15	25	6	7	adhesion G protein-coupled receptor L1 [Source:RGD Symbol;Acc:620768]
Adgrl1	chr19	RDG_60min_no_LTP	122.595	133.741	464	430	34	55	8	9	22	37	8	9	adhesion G protein-coupled receptor L1 [Source:RGD Symbol;Acc:620768]
Adgrl2	chr2	LDG_10min_LTP	152.08	128.984	5	5	0	0	0	0	0	0	0	0	adhesion G protein-coupled receptor L2 [Source:RGD Symbol;Acc:620835]
Adgrl2	chr2	LDG_60min_LTP	92.75	92.75	1	1	0	0	0	0	0	0	0	0	adhesion G protein-coupled receptor L2 [Source:RGD Symbol;Acc:620835]
Adgrl2	chr2	RDG_60min_no_LTP	130	116.365	11	11	0	0	0	0	0	0	0	0	adhesion G protein-coupled receptor L2 [Source:RGD Symbol;Acc:620835]
Adgrl3	chr14	LDG_10min_LTP	111.24	123.387	71	68	3	3	1	1	1	1	1	1	adhesion G protein-coupled receptor L3 [Source:RGD Symbol;Acc:620836]
Adgrl3	chr14	LDG_60min_LTP	135.33	139.763	51	47	4	6	1	1	1	2	3	3	adhesion G protein-coupled receptor L3 [Source:RGD Symbol;Acc:620836]
Adgrl3	chr14	RDG_10min_no_LTP	129.21	126.273	42	42	0	0	0	0	0	0	0	0	adhesion G protein-coupled receptor L3 [Source:RGD Symbol;Acc:620836]
Adgrl3	chr14	RDG_60min_no_LTP	132.5	131.973	78	76	2	2	1	1	0	0	1	1	adhesion G protein-coupled receptor L3 [Source:RGD Symbol;Acc:620836]
Adgrl4	chr2	LDG_10min_LTP	114.56	132.648	5	5	0	0	0	0	0	0	0	0	adhesion G protein-coupled receptor L4 [Source:RGD Symbol;Acc:621136]
Adgrl4	chr2	LDG_60min_LTP	140.43	143.354	9	9	0	0	0	0	0	0	0	0	adhesion G protein-coupled receptor L4 [Source:RGD Symbol;Acc:621136]
Adgrl4	chr2	RDG_10min_no_LTP	125.91	148.928	10	10	0	0	0	0	0	0	0	0	adhesion G protein-coupled receptor L4 [Source:RGD Symbol;Acc:621136]
Adgrl4	chr2	RDG_60min_no_LTP	167.64	157.39	21	20	1	1	1	1	0	0	0	0	adhesion G protein-coupled receptor L4 [Source:RGD Symbol;Acc:621136]
Adgrv1	chr2	LDG_10min_LTP	65.805	87.9896	24	24	0	0	0	0	0	0	0	0	adhesion G protein-coupled receptor V1 [Source:RGD Symbol;Acc:1562101]
Adgrv1	chr2	LDG_60min_LTP	98.19	113.268	26	26	0	0	0	0	0	0	0	0	adhesion G protein-coupled receptor V1 [Source:RGD Symbol;Acc:1562101]
Adgrv1	chr2	RDG_10min_no_LTP	94.62	105.651	24	23	1	1	1	1	0	0	0	0	adhesion G protein-coupled receptor V1 [Source:RGD Symbol;Acc:1562101]
Adgrv1	chr2	RDG_60min_no_LTP	114.32	116.699	28	28	0	0	0	0	0	0	0	0	adhesion G protein-coupled receptor V1 [Source:RGD Symbol;Acc:1562101]
Adh1	chr2	RDG_10min_no_LTP	84.84	84.84	1	0	1	2	0	0	0	0	1	2
Adh5	chr2	LDG_10min_LTP	111.56	110.928	109	106	3	3	3	3	0	0	0	0	alcohol dehydrogenase 5 (class III), chi polypeptide [Source:RGD Symbol;Acc:2292706]
Adh5	chr2	LDG_60min_LTP	99.69	101.91	63	59	4	5	2	2	1	1	2	2	alcohol dehydrogenase 5 (class III), chi polypeptide [Source:RGD Symbol;Acc:2292706]
Adh5	chr2	RDG_10min_no_LTP	116.46	119.493	94	88	6	7	1	1	4	4	2	2	alcohol dehydrogenase 5 (class III), chi polypeptide [Source:RGD Symbol;Acc:2292706]
Adh5	chr2	RDG_60min_no_LTP	109.445	107.75	110	109	1	1	0	0	0	0	1	1	alcohol dehydrogenase 5 (class III), chi polypeptide [Source:RGD Symbol;Acc:2292706]
Adhfe1	chr5	LDG_10min_LTP	131.08	133.09	35	31	4	4	1	1	1	1	2	2	alcohol dehydrogenase, iron containing, 1 [Source:RGD Symbol;Acc:1308863]
Adhfe1	chr5	LDG_60min_LTP	117.68	133.23	36	35	1	1	0	0	0	0	1	1	alcohol dehydrogenase, iron containing, 1 [Source:RGD Symbol;Acc:1308863]
Adhfe1	chr5	RDG_10min_no_LTP	129.01	129.256	34	32	2	2	1	1	0	0	1	1	alcohol dehydrogenase, iron containing, 1 [Source:RGD Symbol;Acc:1308863]
Adhfe1	chr5	RDG_60min_no_LTP	119.62	131.127	52	49	3	3	1	1	0	0	2	2	alcohol dehydrogenase, iron containing, 1 [Source:RGD Symbol;Acc:1308863]
Adi1	chr6	LDG_10min_LTP	89.12	101.423	45	42	3	4	0	0	2	3	1	1	acireductone dioxygenase 1 [Source:RGD Symbol;Acc:727828]
Adi1	chr6	LDG_60min_LTP	102.22	106.078	45	44	1	1	1	1	0	0	0	0	acireductone dioxygenase 1 [Source:RGD Symbol;Acc:727828]
Adi1	chr6	RDG_10min_no_LTP	104.16	100.821	52	47	5	8	2	2	3	3	2	3	acireductone dioxygenase 1 [Source:RGD Symbol;Acc:727828]
Adi1	chr6	RDG_60min_no_LTP	116.64	114.375	60	57	3	3	0	0	3	3	0	0	acireductone dioxygenase 1 [Source:RGD Symbol;Acc:727828]
Adipor1	chr13	LDG_10min_LTP	77.57	93.6917	134	130	4	4	2	2	1	1	1	1	adiponectin receptor 1 [Source:RGD Symbol;Acc:1303151]
Adipor1	chr13	LDG_60min_LTP	82.46	90.9029	97	91	6	7	2	2	2	2	3	3	adiponectin receptor 1 [Source:RGD Symbol;Acc:1303151]
Adipor1	chr13	RDG_10min_no_LTP	97	108.363	125	121	4	7	2	2	2	4	1	1	adiponectin receptor 1 [Source:RGD Symbol;Acc:1303151]
Adipor1	chr13	RDG_60min_no_LTP	103.21	114.862	151	149	2	3	0	0	2	3	0	0	adiponectin receptor 1 [Source:RGD Symbol;Acc:1303151]
Adipor2	chr4	LDG_10min_LTP	100.5	123.935	15	13	2	4	1	1	1	1	2	2	adiponectin receptor 2 [Source:RGD Symbol;Acc:1307891]
Adipor2	chr4	LDG_60min_LTP	122.695	137.399	10	9	1	1	1	1	0	0	0	0	adiponectin receptor 2 [Source:RGD Symbol;Acc:1307891]
Adipor2	chr4	RDG_10min_no_LTP	119.645	120.593	8	8	0	0	0	0	0	0	0	0	adiponectin receptor 2 [Source:RGD Symbol;Acc:1307891]
Adipor2	chr4	RDG_60min_no_LTP	103	138.719	13	11	2	3	1	1	1	1	1	1	adiponectin receptor 2 [Source:RGD Symbol;Acc:1307891]
Adk	chr15	LDG_10min_LTP	113.935	115.691	110	106	4	5	1	1	1	1	2	3	adenosine kinase [Source:RGD Symbol;Acc:2046]
Adk	chr15	LDG_60min_LTP	112.67	123.023	83	80	3	3	0	0	2	2	1	1	adenosine kinase [Source:RGD Symbol;Acc:2046]
Adk	chr15	RDG_10min_no_LTP	99.255	110.466	88	85	3	3	1	1	2	2	0	0	adenosine kinase [Source:RGD Symbol;Acc:2046]
Adk	chr15	RDG_60min_no_LTP	113.01	122.077	114	109	5	6	1	1	4	4	1	1	adenosine kinase [Source:RGD Symbol;Acc:2046]
Adm	chr1	LDG_10min_LTP	85.095	97.63	4	4	0	0	0	0	0	0	0	0	adrenomedullin [Source:RGD Symbol;Acc:2047]
Adm	chr1	LDG_60min_LTP	57.08	57.08	1	1	0	0	0	0	0	0	0	0	adrenomedullin [Source:RGD Symbol;Acc:2047]
Adm	chr1	RDG_60min_no_LTP	271.38	212.047	3	3	0	0	0	0	0	0	0	0	adrenomedullin [Source:RGD Symbol;Acc:2047]
Adnp	chr3	LDG_10min_LTP	113.14	131.526	134	120	14	16	0	0	13	15	1	1	activity-dependent neuroprotector homeobox [Source:RGD Symbol;Acc:71030]
Adnp	chr3	LDG_60min_LTP	98.285	117.173	98	84	14	16	2	2	11	13	1	1	activity-dependent neuroprotector homeobox [Source:RGD Symbol;Acc:71030]
Adnp	chr3	RDG_10min_no_LTP	101.3	118.51	114	99	15	22	2	3	12	17	2	2	activity-dependent neuroprotector homeobox [Source:RGD Symbol;Acc:71030]
Adnp	chr3	RDG_60min_no_LTP	95.175	117.385	164	146	18	23	1	1	17	22	0	0	activity-dependent neuroprotector homeobox [Source:RGD Symbol;Acc:71030]
Adnp2	chr18	LDG_10min_LTP	99.48	129.063	28	28	0	0	0	0	0	0	0	0	ADNP homeobox 2 [Source:RGD Symbol;Acc:1308279]
Adnp2	chr18	LDG_60min_LTP	117.93	112.946	20	18	2	2	2	2	0	0	0	0	ADNP homeobox 2 [Source:RGD Symbol;Acc:1308279]
Adnp2	chr18	RDG_10min_no_LTP	136.87	119.748	21	20	1	1	1	1	0	0	0	0	ADNP homeobox 2 [Source:RGD Symbol;Acc:1308279]
Adnp2	chr18	RDG_60min_no_LTP	98.415	114.511	28	28	0	0	0	0	0	0	0	0	ADNP homeobox 2 [Source:RGD Symbol;Acc:1308279]
Ado	chr20	LDG_10min_LTP	91.36	103.666	19	19	0	0	0	0	0	0	0	0	2-aminoethanethiol dioxygenase [Source:RGD Symbol;Acc:1308233]
Ado	chr20	LDG_60min_LTP	104.785	114.561	22	21	1	1	1	1	0	0	0	0	2-aminoethanethiol dioxygenase [Source:RGD Symbol;Acc:1308233]
Ado	chr20	RDG_10min_no_LTP	136	144.235	8	8	0	0	0	0	0	0	0	0	2-aminoethanethiol dioxygenase [Source:RGD Symbol;Acc:1308233]
Ado	chr20	RDG_60min_no_LTP	82.92	94.4357	23	23	0	0	0	0	0	0	0	0	2-aminoethanethiol dioxygenase [Source:RGD Symbol;Acc:1308233]
Adora1	chr13	LDG_10min_LTP	108.765	114.518	274	262	12	13	5	5	7	8	0	0	adenosine A1 receptor [Source:RGD Symbol;Acc:2048]
Adora1	chr13	LDG_60min_LTP	115.54	116.309	210	197	13	14	4	4	7	8	2	2	adenosine A1 receptor [Source:RGD Symbol;Acc:2048]
Adora1	chr13	RDG_10min_no_LTP	120.545	122.809	188	175	13	15	1	1	10	11	3	3	adenosine A1 receptor [Source:RGD Symbol;Acc:2048]
Adora1	chr13	RDG_60min_no_LTP	110.09	117.245	251	233	18	22	4	4	10	11	5	7	adenosine A1 receptor [Source:RGD Symbol;Acc:2048]
Adora2a	chr20	LDG_10min_LTP	71.92	107.381	8	8	0	0	0	0	0	0	0	0	adenosine A2a receptor [Source:RGD Symbol;Acc:2049]
Adora2a	chr20	LDG_60min_LTP	110	101.363	3	3	0	0	0	0	0	0	0	0	adenosine A2a receptor [Source:RGD Symbol;Acc:2049]
Adora2a	chr20	RDG_10min_no_LTP	56.965	56.965	2	2	0	0	0	0	0	0	0	0	adenosine A2a receptor [Source:RGD Symbol;Acc:2049]
Adora2a	chr20	RDG_60min_no_LTP	80.4	83.37	6	6	0	0	0	0	0	0	0	0	adenosine A2a receptor [Source:RGD Symbol;Acc:2049]
Adora2b	chr10	LDG_10min_LTP	88.92	94.4943	7	7	0	0	0	0	0	0	0	0	adenosine A2B receptor [Source:RGD Symbol;Acc:2050]
Adora2b	chr10	LDG_60min_LTP	96.175	98.79	8	8	0	0	0	0	0	0	0	0	adenosine A2B receptor [Source:RGD Symbol;Acc:2050]
Adora2b	chr10	RDG_10min_no_LTP	98.78	103.267	7	7	0	0	0	0	0	0	0	0	adenosine A2B receptor [Source:RGD Symbol;Acc:2050]
Adora2b	chr10	RDG_60min_no_LTP	82.185	86.8414	14	14	0	0	0	0	0	0	0	0	adenosine A2B receptor [Source:RGD Symbol;Acc:2050]
Adpgk	chr8	LDG_10min_LTP	86.7	114.54	47	46	1	1	1	1	0	0	0	0	ADP-dependent glucokinase [Source:RGD Symbol;Acc:1306103]
Adpgk	chr8	LDG_60min_LTP	93.975	117.788	26	25	1	1	0	0	1	1	0	0	ADP-dependent glucokinase [Source:RGD Symbol;Acc:1306103]
Adpgk	chr8	RDG_10min_no_LTP	100.21	112.161	29	29	0	0	0	0	0	0	0	0	ADP-dependent glucokinase [Source:RGD Symbol;Acc:1306103]
Adpgk	chr8	RDG_60min_no_LTP	130.72	132.824	33	33	0	0	0	0	0	0	0	0	ADP-dependent glucokinase [Source:RGD Symbol;Acc:1306103]
Adprh	chr11	LDG_10min_LTP	89.23	99.2056	102	99	3	3	2	2	0	0	1	1	ADP-ribosylarginine hydrolase [Source:RGD Symbol;Acc:2052]
Adprh	chr11	LDG_60min_LTP	66.22	84.2274	62	60	2	3	2	3	0	0	0	0	ADP-ribosylarginine hydrolase [Source:RGD Symbol;Acc:2052]
Adprh	chr11	RDG_10min_no_LTP	91.63	95.921	79	75	4	7	3	3	2	3	1	1	ADP-ribosylarginine hydrolase [Source:RGD Symbol;Acc:2052]
Adprh	chr11	RDG_60min_no_LTP	82.15	95.3356	110	108	2	2	1	1	1	1	0	0	ADP-ribosylarginine hydrolase [Source:RGD Symbol;Acc:2052]
Adprhl1	chr16	RDG_60min_no_LTP	38.65	38.65	1	1	0	0	0	0	0	0	0	0	ADP-ribosylhydrolase like 1 [Source:RGD Symbol;Acc:1305641]
Adprm	chr10	LDG_10min_LTP	114.895	112.991	32	30	2	2	1	1	0	0	1	1	ADP-ribose/CDP-alcohol diphosphatase, manganese-dependent [Source:RGD Symbol;Acc:1309906]
Adprm	chr10	LDG_60min_LTP	120.09	115.191	13	12	1	1	0	0	1	1	0	0	ADP-ribose/CDP-alcohol diphosphatase, manganese-dependent [Source:RGD Symbol;Acc:1309906]
Adprm	chr10	RDG_10min_no_LTP	77.82	100.509	22	22	0	0	0	0	0	0	0	0	ADP-ribose/CDP-alcohol diphosphatase, manganese-dependent [Source:RGD Symbol;Acc:1309906]
Adprm	chr10	RDG_60min_no_LTP	151.37	152.036	29	28	1	1	0	0	1	1	0	0	ADP-ribose/CDP-alcohol diphosphatase, manganese-dependent [Source:RGD Symbol;Acc:1309906]
Adprs	chr5	LDG_10min_LTP	108.69	114.037	67	65	2	3	1	1	1	1	1	1	ADP-ribosylserine hydrolase [Source:RGD Symbol;Acc:1309068]
Adprs	chr5	LDG_60min_LTP	120.12	118.655	52	47	5	6	1	1	4	4	1	1	ADP-ribosylserine hydrolase [Source:RGD Symbol;Acc:1309068]
Adprs	chr5	RDG_10min_no_LTP	124.37	122.275	63	62	1	1	1	1	0	0	0	0	ADP-ribosylserine hydrolase [Source:RGD Symbol;Acc:1309068]
Adprs	chr5	RDG_60min_no_LTP	121.35	123.026	92	87	5	7	3	4	1	1	1	2	ADP-ribosylserine hydrolase [Source:RGD Symbol;Acc:1309068]
Adra1a	chr15	LDG_10min_LTP	111.75	135.141	17	17	0	0	0	0	0	0	0	0	adrenoceptor alpha 1A [Source:RGD Symbol;Acc:2055]
Adra1a	chr15	LDG_60min_LTP	130.17	140.872	17	17	0	0	0	0	0	0	0	0	adrenoceptor alpha 1A [Source:RGD Symbol;Acc:2055]
Adra1a	chr15	RDG_10min_no_LTP	101.435	127.027	6	6	0	0	0	0	0	0	0	0	adrenoceptor alpha 1A [Source:RGD Symbol;Acc:2055]
Adra1a	chr15	RDG_60min_no_LTP	135.37	132.404	20	19	1	1	0	0	1	1	0	0	adrenoceptor alpha 1A [Source:RGD Symbol;Acc:2055]
Adra1b	chr10	LDG_10min_LTP	95.82	113.66	4	3	1	1	1	1	0	0	0	0	adrenoceptor alpha 1B [Source:RGD Symbol;Acc:2054]
Adra1b	chr10	LDG_60min_LTP	43.96	43.96	1	1	0	0	0	0	0	0	0	0	adrenoceptor alpha 1B [Source:RGD Symbol;Acc:2054]
Adra1b	chr10	RDG_10min_no_LTP	88.89	88.89	1	1	0	0	0	0	0	0	0	0	adrenoceptor alpha 1B [Source:RGD Symbol;Acc:2054]
Adra1b	chr10	RDG_60min_no_LTP	78.875	78.875	2	2	0	0	0	0	0	0	0	0	adrenoceptor alpha 1B [Source:RGD Symbol;Acc:2054]
Adra1d	chr3	LDG_10min_LTP	80.155	93.2234	116	115	1	1	0	0	0	0	1	1	adrenoceptor alpha 1D [Source:RGD Symbol;Acc:62064]
Adra1d	chr3	LDG_60min_LTP	94.8	95.6602	90	87	3	3	0	0	1	1	2	2	adrenoceptor alpha 1D [Source:RGD Symbol;Acc:62064]
Adra1d	chr3	RDG_10min_no_LTP	94.785	98.533	116	115	1	1	0	0	1	1	0	0	adrenoceptor alpha 1D [Source:RGD Symbol;Acc:62064]
Adra1d	chr3	RDG_60min_no_LTP	104.92	109.723	171	169	2	2	0	0	0	0	2	2	adrenoceptor alpha 1D [Source:RGD Symbol;Acc:62064]
Adra2a	chr1	LDG_10min_LTP	98.245	102.159	14	13	1	1	0	0	0	0	1	1	adrenoceptor alpha 2A [Source:RGD Symbol;Acc:2056]
Adra2a	chr1	LDG_60min_LTP	104.5	106.627	9	8	1	1	1	1	0	0	0	0	adrenoceptor alpha 2A [Source:RGD Symbol;Acc:2056]
Adra2a	chr1	RDG_10min_no_LTP	68.835	85.545	8	8	0	0	0	0	0	0	0	0	adrenoceptor alpha 2A [Source:RGD Symbol;Acc:2056]
Adra2a	chr1	RDG_60min_no_LTP	74.69	83.253	20	19	1	1	1	1	0	0	0	0	adrenoceptor alpha 2A [Source:RGD Symbol;Acc:2056]
Adra2c	chr14	LDG_10min_LTP	66.31	85.4376	25	24	1	1	0	0	1	1	0	0	adrenoceptor alpha 2C [Source:RGD Symbol;Acc:2058]
Adra2c	chr14	LDG_60min_LTP	50.54	68.4333	21	21	0	0	0	0	0	0	0	0	adrenoceptor alpha 2C [Source:RGD Symbol;Acc:2058]
Adra2c	chr14	RDG_10min_no_LTP	75.33	79.56	20	20	0	0	0	0	0	0	0	0	adrenoceptor alpha 2C [Source:RGD Symbol;Acc:2058]
Adra2c	chr14	RDG_60min_no_LTP	70.59	80.704	47	46	1	1	1	1	0	0	0	0	adrenoceptor alpha 2C [Source:RGD Symbol;Acc:2058]
Adrb1	chr1	LDG_10min_LTP	98.18	120.947	10	10	0	0	0	0	0	0	0	0	adrenoceptor beta 1 [Source:RGD Symbol;Acc:2059]
Adrb1	chr1	LDG_60min_LTP	118.81	126.831	11	11	0	0	0	0	0	0	0	0	adrenoceptor beta 1 [Source:RGD Symbol;Acc:2059]
Adrb1	chr1	RDG_10min_no_LTP	83.57	117.058	8	8	0	0	0	0	0	0	0	0	adrenoceptor beta 1 [Source:RGD Symbol;Acc:2059]
Adrb1	chr1	RDG_60min_no_LTP	106.645	106.984	12	12	0	0	0	0	0	0	0	0	adrenoceptor beta 1 [Source:RGD Symbol;Acc:2059]
Adrb2	chr18	LDG_10min_LTP	169.68	169.68	1	1	0	0	0	0	0	0	0	0	adrenoceptor beta 2 [Source:RGD Symbol;Acc:2060]
Adrb2	chr18	RDG_10min_no_LTP	103.215	103.215	2	2	0	0	0	0	0	0	0	0	adrenoceptor beta 2 [Source:RGD Symbol;Acc:2060]
Adrb2	chr18	RDG_60min_no_LTP	40.355	40.355	2	2	0	0	0	0	0	0	0	0	adrenoceptor beta 2 [Source:RGD Symbol;Acc:2060]
Adrm1	chr3	LDG_10min_LTP	101.27	116.3	184	179	5	5	2	2	2	2	1	1	ADRM1 26S proteasome ubiquitin receptor [Source:RGD Symbol;Acc:69248]
Adrm1	chr3	LDG_60min_LTP	102.65	117.957	135	132	3	3	1	1	1	1	1	1	ADRM1 26S proteasome ubiquitin receptor [Source:RGD Symbol;Acc:69248]
Adrm1	chr3	RDG_10min_no_LTP	92.83	113.225	139	133	6	6	1	1	2	2	3	3	ADRM1 26S proteasome ubiquitin receptor [Source:RGD Symbol;Acc:69248]
Adrm1	chr3	RDG_60min_no_LTP	88.09	103.256	190	180	10	10	5	5	2	2	3	3	ADRM1 26S proteasome ubiquitin receptor [Source:RGD Symbol;Acc:69248]
Adsl	chr7	LDG_10min_LTP	103.11	115.914	105	100	5	7	2	2	2	3	2	2	adenylosuccinate lyase [Source:RGD Symbol;Acc:1307617]
Adsl	chr7	LDG_60min_LTP	85.9	111.348	97	95	2	2	2	2	0	0	0	0	adenylosuccinate lyase [Source:RGD Symbol;Acc:1307617]
Adsl	chr7	RDG_10min_no_LTP	119.74	145.135	82	79	3	3	0	0	1	1	2	2	adenylosuccinate lyase [Source:RGD Symbol;Acc:1307617]
Adsl	chr7	RDG_60min_no_LTP	122.4	136.487	129	123	6	6	2	2	2	2	2	2	adenylosuccinate lyase [Source:RGD Symbol;Acc:1307617]
Adss	chr13	LDG_10min_LTP	78.995	96.917	76	71	5	5	3	3	1	1	1	1	adenylosuccinate synthase [Source:RGD Symbol;Acc:1310508]
Adss	chr13	LDG_60min_LTP	82.12	94.5953	43	41	2	2	1	1	0	0	1	1	adenylosuccinate synthase [Source:RGD Symbol;Acc:1310508]
Adss	chr13	RDG_10min_no_LTP	67.875	91.7307	70	67	3	3	3	3	0	0	0	0	adenylosuccinate synthase [Source:RGD Symbol;Acc:1310508]
Adss	chr13	RDG_60min_no_LTP	115.35	121.487	66	63	3	4	1	1	2	3	0	0	adenylosuccinate synthase [Source:RGD Symbol;Acc:1310508]
Adssl1	chr6	LDG_10min_LTP	324.85	324.85	1	1	0	0	0	0	0	0	0	0
Adssl1	chr6	RDG_10min_no_LTP	49.215	49.215	2	2	0	0	0	0	0	0	0	0
Adssl1	chr6	RDG_60min_no_LTP	77.87	78.04	3	3	0	0	0	0	0	0	0	0
Adtrp	chr17	LDG_10min_LTP	65.32	67.7763	8	8	0	0	0	0	0	0	0	0	androgen-dependent TFPI-regulating protein [Source:RGD Symbol;Acc:1305679]
Adtrp	chr17	LDG_60min_LTP	147.825	147.825	2	2	0	0	0	0	0	0	0	0	androgen-dependent TFPI-regulating protein [Source:RGD Symbol;Acc:1305679]
Adtrp	chr17	RDG_10min_no_LTP	90.69	100.745	4	4	0	0	0	0	0	0	0	0	androgen-dependent TFPI-regulating protein [Source:RGD Symbol;Acc:1305679]
Adtrp	chr17	RDG_60min_no_LTP	74.68	84.228	10	10	0	0	0	0	0	0	0	0	androgen-dependent TFPI-regulating protein [Source:RGD Symbol;Acc:1305679]
Aebp1	chr14	LDG_10min_LTP	79.78	89.9314	21	21	0	0	0	0	0	0	0	0	AE binding protein 1 [Source:RGD Symbol;Acc:1306922]
Aebp1	chr14	LDG_60min_LTP	77.15	91.4591	11	11	0	0	0	0	0	0	0	0	AE binding protein 1 [Source:RGD Symbol;Acc:1306922]
Aebp1	chr14	RDG_10min_no_LTP	88	93.83	23	21	2	2	1	1	0	0	1	1	AE binding protein 1 [Source:RGD Symbol;Acc:1306922]
Aebp1	chr14	RDG_60min_no_LTP	53.45	79.2	36	35	1	1	1	1	0	0	0	0	AE binding protein 1 [Source:RGD Symbol;Acc:1306922]
Aebp2	chr4	LDG_10min_LTP	115.77	117.802	40	39	1	1	1	1	0	0	0	0	AE binding protein 2 [Source:RGD Symbol;Acc:1307233]
Aebp2	chr4	LDG_60min_LTP	147.62	158.985	37	36	1	1	1	1	0	0	0	0	AE binding protein 2 [Source:RGD Symbol;Acc:1307233]
Aebp2	chr4	RDG_10min_no_LTP	83.88	115.452	28	27	1	1	1	1	0	0	0	0	AE binding protein 2 [Source:RGD Symbol;Acc:1307233]
Aebp2	chr4	RDG_60min_no_LTP	131.175	141.033	66	64	2	2	2	2	0	0	0	0	AE binding protein 2 [Source:RGD Symbol;Acc:1307233]
Aen	chr1	LDG_10min_LTP	87.93	97.0738	13	13	0	0	0	0	0	0	0	0	apoptosis enhancing nuclease [Source:RGD Symbol;Acc:1305051]
Aen	chr1	LDG_60min_LTP	71.865	84.771	10	10	0	0	0	0	0	0	0	0	apoptosis enhancing nuclease [Source:RGD Symbol;Acc:1305051]
Aen	chr1	RDG_10min_no_LTP	96.81	107.373	14	13	1	1	0	0	0	0	1	1	apoptosis enhancing nuclease [Source:RGD Symbol;Acc:1305051]
Aen	chr1	RDG_60min_no_LTP	167.97	164.124	15	15	0	0	0	0	0	0	0	0	apoptosis enhancing nuclease [Source:RGD Symbol;Acc:1305051]
Afap1	chr14	LDG_10min_LTP	128.52	127.877	30	28	2	2	1	1	1	1	0	0	actin filament associated protein 1 [Source:RGD Symbol;Acc:619959]
Afap1	chr14	LDG_60min_LTP	118.2	127.184	24	23	1	1	0	0	0	0	1	1	actin filament associated protein 1 [Source:RGD Symbol;Acc:619959]
Afap1	chr14	RDG_10min_no_LTP	126.35	115.826	27	27	0	0	0	0	0	0	0	0	actin filament associated protein 1 [Source:RGD Symbol;Acc:619959]
Afap1	chr14	RDG_60min_no_LTP	144.505	146.01	46	45	1	1	0	0	0	0	1	1	actin filament associated protein 1 [Source:RGD Symbol;Acc:619959]
Afap1l1	chr18	LDG_10min_LTP	131.715	121.67	4	4	0	0	0	0	0	0	0	0	actin filament associated protein 1-like 1 [Source:RGD Symbol;Acc:1311580]
Afap1l1	chr18	LDG_60min_LTP	85.055	85.055	2	2	0	0	0	0	0	0	0	0	actin filament associated protein 1-like 1 [Source:RGD Symbol;Acc:1311580]
Afap1l1	chr18	RDG_10min_no_LTP	74.555	90.49	6	6	0	0	0	0	0	0	0	0	actin filament associated protein 1-like 1 [Source:RGD Symbol;Acc:1311580]
Afap1l1	chr18	RDG_60min_no_LTP	131.645	130.748	4	4	0	0	0	0	0	0	0	0	actin filament associated protein 1-like 1 [Source:RGD Symbol;Acc:1311580]
Afap1l2	chr1	LDG_10min_LTP	172.69	158.146	11	11	0	0	0	0	0	0	0	0	actin filament associated protein 1-like 2 [Source:RGD Symbol;Acc:1310668]
Afap1l2	chr1	LDG_60min_LTP	129.62	129.62	2	2	0	0	0	0	0	0	0	0	actin filament associated protein 1-like 2 [Source:RGD Symbol;Acc:1310668]
Afap1l2	chr1	RDG_10min_no_LTP	111.63	112.417	7	7	0	0	0	0	0	0	0	0	actin filament associated protein 1-like 2 [Source:RGD Symbol;Acc:1310668]
Afap1l2	chr1	RDG_60min_no_LTP	88.28	133.876	5	5	0	0	0	0	0	0	0	0	actin filament associated protein 1-like 2 [Source:RGD Symbol;Acc:1310668]
Afdn	chr1	LDG_10min_LTP	146.64	157.375	56	52	4	4	1	1	0	0	3	3	afadin, adherens junction formation factor [Source:RGD Symbol;Acc:708561]
Afdn	chr1	LDG_60min_LTP	155.02	167.995	37	36	1	2	0	0	1	2	0	0	afadin, adherens junction formation factor [Source:RGD Symbol;Acc:708561]
Afdn	chr1	RDG_10min_no_LTP	122.19	137.446	39	38	1	1	0	0	1	1	0	0	afadin, adherens junction formation factor [Source:RGD Symbol;Acc:708561]
Afdn	chr1	RDG_60min_no_LTP	157.21	167.062	57	55	2	3	1	1	1	2	0	0	afadin, adherens junction formation factor [Source:RGD Symbol;Acc:708561]
Aff1	chr14	LDG_10min_LTP	87.575	110.983	10	10	0	0	0	0	0	0	0	0	ALF transcription elongation factor 1 [Source:RGD Symbol;Acc:1307940]
Aff1	chr14	LDG_60min_LTP	120.96	147.082	15	15	0	0	0	0	0	0	0	0	ALF transcription elongation factor 1 [Source:RGD Symbol;Acc:1307940]
Aff1	chr14	RDG_10min_no_LTP	175.63	162.584	7	6	1	1	0	0	0	0	1	1	ALF transcription elongation factor 1 [Source:RGD Symbol;Acc:1307940]
Aff1	chr14	RDG_60min_no_LTP	102.79	121.674	11	11	0	0	0	0	0	0	0	0	ALF transcription elongation factor 1 [Source:RGD Symbol;Acc:1307940]
Aff1-as1	chr14	LDG_60min_LTP	148.87	148.87	1	1	0	0	0	0	0	0	0	0	AFF1 antisense RNA 1 [Source:RGD Symbol;Acc:1564576]
Aff2	chrX	LDG_10min_LTP	114.63	116.515	13	13	0	0	0	0	0	0	0	0	ALF transcription elongation factor 2 [Source:RGD Symbol;Acc:1565592]
Aff2	chrX	LDG_60min_LTP	156.385	159.476	8	8	0	0	0	0	0	0	0	0	ALF transcription elongation factor 2 [Source:RGD Symbol;Acc:1565592]
Aff2	chrX	RDG_10min_no_LTP	118.21	123.129	10	8	2	3	1	1	1	2	0	0	ALF transcription elongation factor 2 [Source:RGD Symbol;Acc:1565592]
Aff2	chrX	RDG_60min_no_LTP	92.79	103.623	17	17	0	0	0	0	0	0	0	0	ALF transcription elongation factor 2 [Source:RGD Symbol;Acc:1565592]
Aff3	chr9	LDG_10min_LTP	83.88	101.134	69	69	0	0	0	0	0	0	0	0	ALF transcription elongation factor 3 [Source:RGD Symbol;Acc:1308527]
Aff3	chr9	LDG_60min_LTP	92.73	103.516	69	67	2	2	0	0	2	2	0	0	ALF transcription elongation factor 3 [Source:RGD Symbol;Acc:1308527]
Aff3	chr9	RDG_10min_no_LTP	104.84	108.162	75	75	0	0	0	0	0	0	0	0	ALF transcription elongation factor 3 [Source:RGD Symbol;Acc:1308527]
Aff3	chr9	RDG_60min_no_LTP	91.775	108.26	92	87	5	5	1	1	1	1	3	3	ALF transcription elongation factor 3 [Source:RGD Symbol;Acc:1308527]
Aff4	chr10	LDG_10min_LTP	99.84	116.002	138	134	4	4	3	3	0	0	1	1	ALF transcription elongation factor 4 [Source:RGD Symbol;Acc:1311694]
Aff4	chr10	LDG_60min_LTP	133.81	127.471	137	135	2	2	1	1	0	0	1	1	ALF transcription elongation factor 4 [Source:RGD Symbol;Acc:1311694]
Aff4	chr10	RDG_10min_no_LTP	103	114.46	99	96	3	4	1	1	1	1	2	2	ALF transcription elongation factor 4 [Source:RGD Symbol;Acc:1311694]
Aff4	chr10	RDG_60min_no_LTP	110.76	122.367	181	171	10	14	6	6	4	7	1	1	ALF transcription elongation factor 4 [Source:RGD Symbol;Acc:1311694]
Afg1l	chr20	LDG_10min_LTP	101.67	99.8978	18	18	0	0	0	0	0	0	0	0	AFG1 like ATPase [Source:RGD Symbol;Acc:1561501]
Afg1l	chr20	LDG_60min_LTP	117.9	122.132	19	19	0	0	0	0	0	0	0	0	AFG1 like ATPase [Source:RGD Symbol;Acc:1561501]
Afg1l	chr20	RDG_10min_no_LTP	97.82	112.212	13	13	0	0	0	0	0	0	0	0	AFG1 like ATPase [Source:RGD Symbol;Acc:1561501]
Afg1l	chr20	RDG_60min_no_LTP	98.83	97.6643	21	21	0	0	0	0	0	0	0	0	AFG1 like ATPase [Source:RGD Symbol;Acc:1561501]
Afg3l1	chr19	LDG_10min_LTP	97.765	109.884	16	16	0	0	0	0	0	0	0	0	AFG3 (ATPase family gene 3)-like 1 [Source:RGD Symbol;Acc:1309722]
Afg3l1	chr19	LDG_60min_LTP	80.585	89.1509	22	22	0	0	0	0	0	0	0	0	AFG3 (ATPase family gene 3)-like 1 [Source:RGD Symbol;Acc:1309722]
Afg3l1	chr19	RDG_10min_no_LTP	65.36	87.0264	14	14	0	0	0	0	0	0	0	0	AFG3 (ATPase family gene 3)-like 1 [Source:RGD Symbol;Acc:1309722]
Afg3l1	chr19	RDG_60min_no_LTP	98.295	102.234	22	21	1	1	1	1	0	0	0	0	AFG3 (ATPase family gene 3)-like 1 [Source:RGD Symbol;Acc:1309722]
Afg3l2	chr18	LDG_10min_LTP	101.2	114.4	74	72	2	2	0	0	1	1	1	1	AFG3 like matrix AAA peptidase subunit 2 [Source:RGD Symbol;Acc:1305259]
Afg3l2	chr18	LDG_60min_LTP	94.28	106.16	59	57	2	2	1	1	0	0	1	1	AFG3 like matrix AAA peptidase subunit 2 [Source:RGD Symbol;Acc:1305259]
Afg3l2	chr18	RDG_10min_no_LTP	132.07	132.585	39	38	1	1	1	1	0	0	0	0	AFG3 like matrix AAA peptidase subunit 2 [Source:RGD Symbol;Acc:1305259]
Afg3l2	chr18	RDG_60min_no_LTP	112.76	128.648	75	72	3	4	0	0	2	3	1	1	AFG3 like matrix AAA peptidase subunit 2 [Source:RGD Symbol;Acc:1305259]
Afmid	chr10	LDG_10min_LTP	118.76	119.404	7	7	0	0	0	0	0	0	0	0	arylformamidase [Source:RGD Symbol;Acc:1591143]
Afmid	chr10	LDG_60min_LTP	121.845	131.534	12	12	0	0	0	0	0	0	0	0	arylformamidase [Source:RGD Symbol;Acc:1591143]
Afmid	chr10	RDG_10min_no_LTP	107.765	98.26	12	12	0	0	0	0	0	0	0	0	arylformamidase [Source:RGD Symbol;Acc:1591143]
Afmid	chr10	RDG_60min_no_LTP	123.225	143.6	8	8	0	0	0	0	0	0	0	0	arylformamidase [Source:RGD Symbol;Acc:1591143]
Afp	chr14	LDG_10min_LTP	292.33	292.33	1	1	0	0	0	0	0	0	0	0	alpha-fetoprotein [Source:RGD Symbol;Acc:2065]
Afp	chr14	LDG_60min_LTP	123.5	123.5	1	1	0	0	0	0	0	0	0	0	alpha-fetoprotein [Source:RGD Symbol;Acc:2065]
Afp	chr14	RDG_10min_no_LTP	111.24	111.24	2	2	0	0	0	0	0	0	0	0	alpha-fetoprotein [Source:RGD Symbol;Acc:2065]
Aftph	chr14	LDG_10min_LTP	125.32	137.803	74	74	0	0	0	0	0	0	0	0	aftiphilin [Source:RGD Symbol;Acc:1311920]
Aftph	chr14	LDG_60min_LTP	146.36	155.205	68	65	3	3	3	3	0	0	0	0	aftiphilin [Source:RGD Symbol;Acc:1311920]
Aftph	chr14	RDG_10min_no_LTP	106.17	119.518	57	52	5	5	1	1	2	2	2	2	aftiphilin [Source:RGD Symbol;Acc:1311920]
Aftph	chr14	RDG_60min_no_LTP	118.585	127.453	94	90	4	4	3	3	0	0	1	1	aftiphilin [Source:RGD Symbol;Acc:1311920]
Aga	chr16	LDG_10min_LTP	109.99	130.893	28	25	3	3	0	0	0	0	3	3	aspartylglucosaminidase [Source:RGD Symbol;Acc:1309646]
Aga	chr16	LDG_60min_LTP	63.32	106.454	15	14	1	1	0	0	0	0	1	1	aspartylglucosaminidase [Source:RGD Symbol;Acc:1309646]
Aga	chr16	RDG_10min_no_LTP	98.075	126.111	32	31	1	1	0	0	0	0	1	1	aspartylglucosaminidase [Source:RGD Symbol;Acc:1309646]
Aga	chr16	RDG_60min_no_LTP	108.945	125.029	34	32	2	2	0	0	0	0	2	2	aspartylglucosaminidase [Source:RGD Symbol;Acc:1309646]
Agap1	chr9	LDG_10min_LTP	94.16	102.653	149	143	6	6	4	4	0	0	2	2	ArfGAP with GTPase domain, ankyrin repeat and PH domain 1 [Source:RGD Symbol;Acc:1309244]
Agap1	chr9	LDG_60min_LTP	85.74	99.1894	113	113	0	0	0	0	0	0	0	0	ArfGAP with GTPase domain, ankyrin repeat and PH domain 1 [Source:RGD Symbol;Acc:1309244]
Agap1	chr9	RDG_10min_no_LTP	97.19	104.394	109	107	2	2	0	0	2	2	0	0	ArfGAP with GTPase domain, ankyrin repeat and PH domain 1 [Source:RGD Symbol;Acc:1309244]
Agap1	chr9	RDG_60min_no_LTP	126.855	125.449	160	157	3	3	0	0	2	2	1	1	ArfGAP with GTPase domain, ankyrin repeat and PH domain 1 [Source:RGD Symbol;Acc:1309244]
Agap2	chr7	LDG_10min_LTP	128.26	128.867	1065	972	93	112	24	24	50	62	25	26	ArfGAP with GTPase domain, ankyrin repeat and PH domain 2 [Source:RGD Symbol;Acc:628844]
Agap2	chr7	LDG_60min_LTP	117.6	123.668	1014	908	106	144	24	27	72	95	19	22	ArfGAP with GTPase domain, ankyrin repeat and PH domain 2 [Source:RGD Symbol;Acc:628844]
Agap2	chr7	RDG_10min_no_LTP	119.77	125.303	785	693	92	118	17	19	59	74	24	25	ArfGAP with GTPase domain, ankyrin repeat and PH domain 2 [Source:RGD Symbol;Acc:628844]
Agap2	chr7	RDG_60min_no_LTP	121.19	124.254	1159	1037	122	145	22	22	71	88	34	35	ArfGAP with GTPase domain, ankyrin repeat and PH domain 2 [Source:RGD Symbol;Acc:628844]
Agap3	chr4	LDG_10min_LTP	109.88	117.09	645	597	48	65	17	18	25	36	11	11	ArfGAP with GTPase domain, ankyrin repeat and PH domain 3 [Source:RGD Symbol;Acc:1310751]
Agap3	chr4	LDG_60min_LTP	104.61	114.213	506	467	39	55	14	15	20	30	9	10	ArfGAP with GTPase domain, ankyrin repeat and PH domain 3 [Source:RGD Symbol;Acc:1310751]
Agap3	chr4	RDG_10min_no_LTP	111.445	119.66	472	439	33	43	8	8	18	22	13	13	ArfGAP with GTPase domain, ankyrin repeat and PH domain 3 [Source:RGD Symbol;Acc:1310751]
Agap3	chr4	RDG_60min_no_LTP	113.83	122.745	632	589	43	72	10	13	32	52	7	7	ArfGAP with GTPase domain, ankyrin repeat and PH domain 3 [Source:RGD Symbol;Acc:1310751]
Agbl3	chr4	LDG_10min_LTP	114.6	182.268	5	5	0	0	0	0	0	0	0	0	AGBL carboxypeptidase 3 [Source:RGD Symbol;Acc:1561995]
Agbl3	chr4	LDG_60min_LTP	270.15	258.244	7	5	2	2	1	1	0	0	1	1	AGBL carboxypeptidase 3 [Source:RGD Symbol;Acc:1561995]
Agbl3	chr4	RDG_10min_no_LTP	145.13	208.494	5	5	0	0	0	0	0	0	0	0	AGBL carboxypeptidase 3 [Source:RGD Symbol;Acc:1561995]
Agbl3	chr4	RDG_60min_no_LTP	225.08	210.642	5	5	0	0	0	0	0	0	0	0	AGBL carboxypeptidase 3 [Source:RGD Symbol;Acc:1561995]
Agbl4	chr5	LDG_10min_LTP	107.69	131.487	7	5	2	3	1	2	0	0	1	1
Agbl4	chr5	LDG_60min_LTP	61.955	66.105	6	6	0	0	0	0	0	0	0	0
Agbl4	chr5	RDG_10min_no_LTP	219.585	219.585	2	2	0	0	0	0	0	0	0	0
Agbl4	chr5	RDG_60min_no_LTP	180.645	186.385	4	4	0	0	0	0	0	0	0	0
Agbl5	chr6	LDG_10min_LTP	41.7	72.0578	9	9	0	0	0	0	0	0	0	0	AGBL carboxypeptidase 5 [Source:RGD Symbol;Acc:1598311]
Agbl5	chr6	LDG_60min_LTP	71.945	103.323	8	8	0	0	0	0	0	0	0	0	AGBL carboxypeptidase 5 [Source:RGD Symbol;Acc:1598311]
Agbl5	chr6	RDG_10min_no_LTP	183.945	204.07	4	4	0	0	0	0	0	0	0	0	AGBL carboxypeptidase 5 [Source:RGD Symbol;Acc:1598311]
Agbl5	chr6	RDG_60min_no_LTP	55.4	113.02	5	4	1	1	0	0	0	0	1	1	AGBL carboxypeptidase 5 [Source:RGD Symbol;Acc:1598311]
Ager	chr20	LDG_10min_LTP	208.9	191.037	4	4	0	0	0	0	0	0	0	0	advanced glycosylation end product-specific receptor [Source:RGD Symbol;Acc:69258]
Ager	chr20	LDG_60min_LTP	207.45	207.45	1	1	0	0	0	0	0	0	0	0	advanced glycosylation end product-specific receptor [Source:RGD Symbol;Acc:69258]
Ager	chr20	RDG_10min_no_LTP	216.83	208.097	3	3	0	0	0	0	0	0	0	0	advanced glycosylation end product-specific receptor [Source:RGD Symbol;Acc:69258]
Ager	chr20	RDG_60min_no_LTP	211.71	211.71	2	2	0	0	0	0	0	0	0	0	advanced glycosylation end product-specific receptor [Source:RGD Symbol;Acc:69258]
Agfg1	chr9	LDG_10min_LTP	111.435	120.892	72	67	5	5	1	1	2	2	2	2	ArfGAP with FG repeats 1 [Source:RGD Symbol;Acc:1560041]
Agfg1	chr9	LDG_60min_LTP	114	125.188	54	52	2	2	2	2	0	0	0	0	ArfGAP with FG repeats 1 [Source:RGD Symbol;Acc:1560041]
Agfg1	chr9	RDG_10min_no_LTP	100.845	111.823	68	67	1	1	1	1	0	0	0	0	ArfGAP with FG repeats 1 [Source:RGD Symbol;Acc:1560041]
Agfg1	chr9	RDG_60min_no_LTP	109.35	114.326	79	77	2	2	1	1	1	1	0	0	ArfGAP with FG repeats 1 [Source:RGD Symbol;Acc:1560041]
Agfg2	chr12	LDG_10min_LTP	102.595	122.077	82	68	14	16	1	1	11	13	2	2	ArfGAP with FG repeats 2 [Source:RGD Symbol;Acc:1306590]
Agfg2	chr12	LDG_60min_LTP	163.96	159.355	79	66	13	18	3	6	10	10	2	2	ArfGAP with FG repeats 2 [Source:RGD Symbol;Acc:1306590]
Agfg2	chr12	RDG_10min_no_LTP	123.32	120.641	64	58	6	8	2	3	3	3	1	2	ArfGAP with FG repeats 2 [Source:RGD Symbol;Acc:1306590]
Agfg2	chr12	RDG_60min_no_LTP	116.425	130.649	112	92	20	22	4	5	15	16	1	1	ArfGAP with FG repeats 2 [Source:RGD Symbol;Acc:1306590]
Aggf1	chr2	LDG_10min_LTP	90.35	105.474	49	48	1	1	0	0	1	1	0	0	angiogenic factor with G patch and FHA domains 1 [Source:RGD Symbol;Acc:1310888]
Aggf1	chr2	LDG_60min_LTP	108.345	114.125	48	48	0	0	0	0	0	0	0	0	angiogenic factor with G patch and FHA domains 1 [Source:RGD Symbol;Acc:1310888]
Aggf1	chr2	RDG_10min_no_LTP	101.4	120.678	40	39	1	1	0	0	1	1	0	0	angiogenic factor with G patch and FHA domains 1 [Source:RGD Symbol;Acc:1310888]
Aggf1	chr2	RDG_60min_no_LTP	116.49	117.378	48	46	2	2	2	2	0	0	0	0	angiogenic factor with G patch and FHA domains 1 [Source:RGD Symbol;Acc:1310888]
Agk	chr4	LDG_10min_LTP	122.57	123.524	30	28	2	2	0	0	1	1	1	1	acylglycerol kinase [Source:RGD Symbol;Acc:1562046]
Agk	chr4	LDG_60min_LTP	112.07	118.325	26	26	0	0	0	0	0	0	0	0	acylglycerol kinase [Source:RGD Symbol;Acc:1562046]
Agk	chr4	RDG_10min_no_LTP	149.31	124.515	21	21	0	0	0	0	0	0	0	0	acylglycerol kinase [Source:RGD Symbol;Acc:1562046]
Agk	chr4	RDG_60min_no_LTP	97.48	129.791	53	48	5	11	3	4	2	4	2	3	acylglycerol kinase [Source:RGD Symbol;Acc:1562046]
Agl	chr2	LDG_10min_LTP	114.945	125.436	40	39	1	1	1	1	0	0	0	0	amylo-alpha-1, 6-glucosidase, 4-alpha-glucanotransferase [Source:RGD Symbol;Acc:1306376]
Agl	chr2	LDG_60min_LTP	146.615	144.391	38	36	2	2	1	1	1	1	0	0	amylo-alpha-1, 6-glucosidase, 4-alpha-glucanotransferase [Source:RGD Symbol;Acc:1306376]
Agl	chr2	RDG_10min_no_LTP	115.79	135.452	29	27	2	2	1	1	0	0	1	1	amylo-alpha-1, 6-glucosidase, 4-alpha-glucanotransferase [Source:RGD Symbol;Acc:1306376]
Agl	chr2	RDG_60min_no_LTP	98.53	110.714	46	46	0	0	0	0	0	0	0	0	amylo-alpha-1, 6-glucosidase, 4-alpha-glucanotransferase [Source:RGD Symbol;Acc:1306376]
Agmat	chr5	LDG_10min_LTP	160.52	160.52	1	1	0	0	0	0	0	0	0	0	agmatinase [Source:RGD Symbol;Acc:1308424]
Agmat	chr5	LDG_60min_LTP	146.31	146.31	1	1	0	0	0	0	0	0	0	0	agmatinase [Source:RGD Symbol;Acc:1308424]
Agmo	chr6	LDG_10min_LTP	83.31	82.19	6	5	1	1	1	1	0	0	0	0	alkylglycerol monooxygenase [Source:RGD Symbol;Acc:1312038]
Agmo	chr6	LDG_60min_LTP	73.685	73.685	2	2	0	0	0	0	0	0	0	0	alkylglycerol monooxygenase [Source:RGD Symbol;Acc:1312038]
Agmo	chr6	RDG_10min_no_LTP	206.73	173.357	3	3	0	0	0	0	0	0	0	0	alkylglycerol monooxygenase [Source:RGD Symbol;Acc:1312038]
Agmo	chr6	RDG_60min_no_LTP	55.33	75.14	3	3	0	0	0	0	0	0	0	0	alkylglycerol monooxygenase [Source:RGD Symbol;Acc:1312038]
Ago1	chr5	LDG_10min_LTP	123.61	128.229	65	65	0	0	0	0	0	0	0	0	argonaute RISC component 1 [Source:RGD Symbol;Acc:1304619]
Ago1	chr5	LDG_60min_LTP	105.87	118.029	49	47	2	2	2	2	0	0	0	0	argonaute RISC component 1 [Source:RGD Symbol;Acc:1304619]
Ago1	chr5	RDG_10min_no_LTP	106.04	116.481	53	51	2	2	1	1	1	1	0	0	argonaute RISC component 1 [Source:RGD Symbol;Acc:1304619]
Ago1	chr5	RDG_60min_no_LTP	138.09	144.046	75	72	3	3	1	1	2	2	0	0	argonaute RISC component 1 [Source:RGD Symbol;Acc:1304619]
Ago2	chr7	LDG_10min_LTP	140.67	146.355	80	76	4	7	1	1	1	2	2	4	argonaute RISC catalytic component 2 [Source:RGD Symbol;Acc:621255]
Ago2	chr7	LDG_60min_LTP	171.79	166.706	79	76	3	3	1	1	1	1	1	1	argonaute RISC catalytic component 2 [Source:RGD Symbol;Acc:621255]
Ago2	chr7	RDG_10min_no_LTP	81.05	107.188	51	50	1	1	1	1	0	0	0	0	argonaute RISC catalytic component 2 [Source:RGD Symbol;Acc:621255]
Ago2	chr7	RDG_60min_no_LTP	146.91	152.217	95	90	5	5	3	3	2	2	0	0	argonaute RISC catalytic component 2 [Source:RGD Symbol;Acc:621255]
Ago3	chr5	LDG_10min_LTP	90.505	90.505	2	2	0	0	0	0	0	0	0	0	argonaute RISC catalytic component 3 [Source:RGD Symbol;Acc:1309163]
Ago3	chr5	LDG_60min_LTP	273.64	273.64	1	1	0	0	0	0	0	0	0	0	argonaute RISC catalytic component 3 [Source:RGD Symbol;Acc:1309163]
Ago3	chr5	RDG_10min_no_LTP	146.16	160.677	3	3	0	0	0	0	0	0	0	0	argonaute RISC catalytic component 3 [Source:RGD Symbol;Acc:1309163]
Ago3	chr5	RDG_60min_no_LTP	169.62	169.62	2	2	0	0	0	0	0	0	0	0	argonaute RISC catalytic component 3 [Source:RGD Symbol;Acc:1309163]
Ago4	chr5	LDG_10min_LTP	118.32	138.714	5	5	0	0	0	0	0	0	0	0	argonaute RISC component 4 [Source:RGD Symbol;Acc:1304583]
Ago4	chr5	RDG_10min_no_LTP	171.85	210.5	3	3	0	0	0	0	0	0	0	0	argonaute RISC component 4 [Source:RGD Symbol;Acc:1304583]
Ago4	chr5	RDG_60min_no_LTP	222.555	201.102	8	8	0	0	0	0	0	0	0	0	argonaute RISC component 4 [Source:RGD Symbol;Acc:1304583]
Agpat1	chr20	LDG_10min_LTP	90.85	98.6426	336	326	10	10	4	4	5	5	1	1	1-acylglycerol-3-phosphate O-acyltransferase 1 [Source:RGD Symbol;Acc:1303287]
Agpat1	chr20	LDG_60min_LTP	80.86	88.8331	273	268	5	5	2	2	2	2	1	1	1-acylglycerol-3-phosphate O-acyltransferase 1 [Source:RGD Symbol;Acc:1303287]
Agpat1	chr20	RDG_10min_no_LTP	81.48	96.3212	319	303	16	22	8	8	7	9	5	5	1-acylglycerol-3-phosphate O-acyltransferase 1 [Source:RGD Symbol;Acc:1303287]
Agpat1	chr20	RDG_60min_no_LTP	90.38	100.562	395	385	10	11	6	6	2	3	2	2	1-acylglycerol-3-phosphate O-acyltransferase 1 [Source:RGD Symbol;Acc:1303287]
Agpat2	chr3	LDG_10min_LTP	132.15	139.29	3	2	1	1	1	1	0	0	0	0	1-acylglycerol-3-phosphate O-acyltransferase 2 [Source:RGD Symbol;Acc:1309229]
Agpat2	chr3	LDG_60min_LTP	28.69	28.69	1	1	0	0	0	0	0	0	0	0	1-acylglycerol-3-phosphate O-acyltransferase 2 [Source:RGD Symbol;Acc:1309229]
Agpat2	chr3	RDG_10min_no_LTP	73.805	73.805	2	2	0	0	0	0	0	0	0	0	1-acylglycerol-3-phosphate O-acyltransferase 2 [Source:RGD Symbol;Acc:1309229]
Agpat2	chr3	RDG_60min_no_LTP	59	59	1	1	0	0	0	0	0	0	0	0	1-acylglycerol-3-phosphate O-acyltransferase 2 [Source:RGD Symbol;Acc:1309229]
Agpat3	chr20	LDG_10min_LTP	116.93	120.759	287	276	11	12	3	3	4	5	4	4	1-acylglycerol-3-phosphate O-acyltransferase 3 [Source:RGD Symbol;Acc:1305787]
Agpat3	chr20	LDG_60min_LTP	112.925	116.396	234	221	13	14	5	5	5	5	4	4	1-acylglycerol-3-phosphate O-acyltransferase 3 [Source:RGD Symbol;Acc:1305787]
Agpat3	chr20	RDG_10min_no_LTP	120.26	125.597	246	231	15	17	5	5	9	11	1	1	1-acylglycerol-3-phosphate O-acyltransferase 3 [Source:RGD Symbol;Acc:1305787]
Agpat3	chr20	RDG_60min_no_LTP	123.06	129.412	310	295	15	17	3	4	8	8	4	5	1-acylglycerol-3-phosphate O-acyltransferase 3 [Source:RGD Symbol;Acc:1305787]
Agpat4	chr1	LDG_10min_LTP	92.64	106.601	164	153	11	11	3	3	2	2	6	6	1-acylglycerol-3-phosphate O-acyltransferase 4 [Source:RGD Symbol;Acc:619916]
Agpat4	chr1	LDG_60min_LTP	92.18	102.985	138	133	5	5	2	2	2	2	1	1	1-acylglycerol-3-phosphate O-acyltransferase 4 [Source:RGD Symbol;Acc:619916]
Agpat4	chr1	RDG_10min_no_LTP	92.72	101.76	127	118	9	11	3	3	2	3	5	5	1-acylglycerol-3-phosphate O-acyltransferase 4 [Source:RGD Symbol;Acc:619916]
Agpat4	chr1	RDG_60min_no_LTP	94.93	108.821	169	162	7	8	2	2	3	4	2	2	1-acylglycerol-3-phosphate O-acyltransferase 4 [Source:RGD Symbol;Acc:619916]
Agpat5	chr16	LDG_10min_LTP	119.61	114.562	92	86	6	6	1	1	3	3	2	2	1-acylglycerol-3-phosphate O-acyltransferase 5 [Source:RGD Symbol;Acc:1306405]
Agpat5	chr16	LDG_60min_LTP	111.59	124.753	69	66	3	3	2	2	0	0	1	1	1-acylglycerol-3-phosphate O-acyltransferase 5 [Source:RGD Symbol;Acc:1306405]
Agpat5	chr16	RDG_10min_no_LTP	115.75	119.974	84	80	4	4	2	2	1	1	1	1	1-acylglycerol-3-phosphate O-acyltransferase 5 [Source:RGD Symbol;Acc:1306405]
Agpat5	chr16	RDG_60min_no_LTP	116.25	122.107	103	99	4	4	1	1	1	1	2	2	1-acylglycerol-3-phosphate O-acyltransferase 5 [Source:RGD Symbol;Acc:1306405]
Agps	chr3	LDG_10min_LTP	104.705	106.767	6	6	0	0	0	0	0	0	0	0	alkylglycerone phosphate synthase [Source:RGD Symbol;Acc:620364]
Agps	chr3	LDG_60min_LTP	85.71	98.9286	7	7	0	0	0	0	0	0	0	0	alkylglycerone phosphate synthase [Source:RGD Symbol;Acc:620364]
Agps	chr3	RDG_10min_no_LTP	89.87	95.88	3	3	0	0	0	0	0	0	0	0	alkylglycerone phosphate synthase [Source:RGD Symbol;Acc:620364]
Agps	chr3	RDG_60min_no_LTP	159.58	168.696	11	11	0	0	0	0	0	0	0	0	alkylglycerone phosphate synthase [Source:RGD Symbol;Acc:620364]
Agrn	chr5	LDG_10min_LTP	165.85	183.743	45	41	4	5	4	4	0	0	1	1	agrin [Source:RGD Symbol;Acc:2067]
Agrn	chr5	LDG_60min_LTP	161.08	165.161	41	41	0	0	0	0	0	0	0	0	agrin [Source:RGD Symbol;Acc:2067]
Agrn	chr5	RDG_10min_no_LTP	137.135	166.67	26	25	1	1	0	0	1	1	0	0	agrin [Source:RGD Symbol;Acc:2067]
Agrn	chr5	RDG_60min_no_LTP	127.07	150.828	62	59	3	3	1	1	2	2	0	0	agrin [Source:RGD Symbol;Acc:2067]
Agrp	chr19	LDG_10min_LTP	84.96	95.9589	37	35	2	2	1	1	0	0	1	1	agouti related neuropeptide [Source:RGD Symbol;Acc:2068]
Agrp	chr19	LDG_60min_LTP	79.43	91.198	35	34	1	1	0	0	0	0	1	1	agouti related neuropeptide [Source:RGD Symbol;Acc:2068]
Agrp	chr19	RDG_10min_no_LTP	88.65	107.225	26	23	3	5	2	3	1	1	1	1	agouti related neuropeptide [Source:RGD Symbol;Acc:2068]
Agrp	chr19	RDG_60min_no_LTP	100.68	102.746	38	36	2	3	2	2	1	1	0	0	agouti related neuropeptide [Source:RGD Symbol;Acc:2068]
Agt	chr19	LDG_10min_LTP	75.54	83.8482	471	455	16	19	7	7	3	4	7	8	angiotensinogen [Source:RGD Symbol;Acc:2069]
Agt	chr19	LDG_60min_LTP	73.695	84.8749	402	385	17	17	4	4	4	4	9	9	angiotensinogen [Source:RGD Symbol;Acc:2069]
Agt	chr19	RDG_10min_no_LTP	75.955	85.4866	426	403	23	30	8	9	3	3	15	18	angiotensinogen [Source:RGD Symbol;Acc:2069]
Agt	chr19	RDG_60min_no_LTP	72.97	82.0604	571	550	21	29	6	9	3	4	13	16	angiotensinogen [Source:RGD Symbol;Acc:2069]
Agtpbp1	chr17	LDG_10min_LTP	106.69	123.904	217	212	5	7	2	2	1	2	3	3	ATP/GTP binding carboxypeptidase 1 [Source:RGD Symbol;Acc:1306307]
Agtpbp1	chr17	LDG_60min_LTP	101.22	122.612	205	201	4	4	1	1	2	2	1	1	ATP/GTP binding carboxypeptidase 1 [Source:RGD Symbol;Acc:1306307]
Agtpbp1	chr17	RDG_10min_no_LTP	98.7	118.156	154	145	9	11	6	6	2	3	2	2	ATP/GTP binding carboxypeptidase 1 [Source:RGD Symbol;Acc:1306307]
Agtpbp1	chr17	RDG_60min_no_LTP	109.97	129.321	239	228	11	13	3	3	3	5	5	5	ATP/GTP binding carboxypeptidase 1 [Source:RGD Symbol;Acc:1306307]
Agtr1b	chr2	RDG_60min_no_LTP	254.87	254.87	1	1	0	0	0	0	0	0	0	0	angiotensin II receptor, type 1b [Source:RGD Symbol;Acc:2071]
Agtrap	chr5	LDG_10min_LTP	114.77	105.024	25	24	1	2	1	2	0	0	0	0	angiotensin II receptor-associated protein [Source:RGD Symbol;Acc:1359346]
Agtrap	chr5	LDG_60min_LTP	85.185	98.0758	26	26	0	0	0	0	0	0	0	0	angiotensin II receptor-associated protein [Source:RGD Symbol;Acc:1359346]
Agtrap	chr5	RDG_10min_no_LTP	87.77	88.6405	20	20	0	0	0	0	0	0	0	0	angiotensin II receptor-associated protein [Source:RGD Symbol;Acc:1359346]
Agtrap	chr5	RDG_60min_no_LTP	96.2	107.881	47	47	0	0	0	0	0	0	0	0	angiotensin II receptor-associated protein [Source:RGD Symbol;Acc:1359346]
Ahctf1	chr13	LDG_10min_LTP	138.65	150.863	32	31	1	1	1	1	0	0	0	0	AT hook containing transcription factor 1 [Source:RGD Symbol;Acc:1561291]
Ahctf1	chr13	LDG_60min_LTP	208.45	191.126	24	22	2	2	0	0	1	1	1	1	AT hook containing transcription factor 1 [Source:RGD Symbol;Acc:1561291]
Ahctf1	chr13	RDG_10min_no_LTP	126.015	137.979	24	24	0	0	0	0	0	0	0	0	AT hook containing transcription factor 1 [Source:RGD Symbol;Acc:1561291]
Ahctf1	chr13	RDG_60min_no_LTP	132.8	141.426	39	37	2	2	2	2	0	0	0	0	AT hook containing transcription factor 1 [Source:RGD Symbol;Acc:1561291]
Ahcy	chr3	LDG_10min_LTP	88.775	97.6898	88	86	2	3	2	3	0	0	0	0	adenosylhomocysteinase [Source:RGD Symbol;Acc:69260]
Ahcy	chr3	LDG_60min_LTP	88.48	91.2106	67	66	1	1	0	0	0	0	1	1	adenosylhomocysteinase [Source:RGD Symbol;Acc:69260]
Ahcy	chr3	RDG_10min_no_LTP	116.295	112.658	48	47	1	1	0	0	1	1	0	0	adenosylhomocysteinase [Source:RGD Symbol;Acc:69260]
Ahcy	chr3	RDG_60min_no_LTP	115.1	109.088	98	95	3	4	0	0	1	1	2	3	adenosylhomocysteinase [Source:RGD Symbol;Acc:69260]
Ahcyl1	chr2	LDG_10min_LTP	124.39	139.227	324	317	7	11	3	3	5	7	1	1	adenosylhomocysteinase-like 1 [Source:RGD Symbol;Acc:1309768]
Ahcyl1	chr2	LDG_60min_LTP	115.265	132.926	314	299	15	19	4	4	4	4	8	11	adenosylhomocysteinase-like 1 [Source:RGD Symbol;Acc:1309768]
Ahcyl1	chr2	RDG_10min_no_LTP	108.555	131.624	254	246	8	8	6	6	0	0	2	2	adenosylhomocysteinase-like 1 [Source:RGD Symbol;Acc:1309768]
Ahcyl1	chr2	RDG_60min_no_LTP	118.575	132.984	408	399	9	9	2	2	4	4	3	3	adenosylhomocysteinase-like 1 [Source:RGD Symbol;Acc:1309768]
Ahcyl2	chr4	LDG_10min_LTP	118.395	129.692	202	196	6	6	3	3	1	1	2	2	adenosylhomocysteinase-like 2 [Source:RGD Symbol;Acc:1564895]
Ahcyl2	chr4	LDG_60min_LTP	129.35	139.35	185	169	16	17	7	7	3	3	7	7	adenosylhomocysteinase-like 2 [Source:RGD Symbol;Acc:1564895]
Ahcyl2	chr4	RDG_10min_no_LTP	111.22	126.45	145	137	8	8	2	2	1	1	5	5	adenosylhomocysteinase-like 2 [Source:RGD Symbol;Acc:1564895]
Ahcyl2	chr4	RDG_60min_no_LTP	129.82	138.933	259	247	12	13	4	4	4	5	4	4	adenosylhomocysteinase-like 2 [Source:RGD Symbol;Acc:1564895]
Ahdc1	chr5	LDG_10min_LTP	103.14	123.326	44	42	2	2	2	2	0	0	0	0	AT hook, DNA binding motif, containing 1 [Source:RGD Symbol;Acc:1310031]
Ahdc1	chr5	LDG_60min_LTP	100.1	112.497	30	29	1	2	0	0	1	2	0	0	AT hook, DNA binding motif, containing 1 [Source:RGD Symbol;Acc:1310031]
Ahdc1	chr5	RDG_10min_no_LTP	91.25	105.61	39	34	5	6	1	1	1	2	3	3	AT hook, DNA binding motif, containing 1 [Source:RGD Symbol;Acc:1310031]
Ahdc1	chr5	RDG_60min_no_LTP	106.175	121.064	44	41	3	3	3	3	0	0	0	0	AT hook, DNA binding motif, containing 1 [Source:RGD Symbol;Acc:1310031]
Ahi1	chr1	LDG_10min_LTP	134.745	156.49	74	66	8	8	4	4	2	2	2	2	Abelson helper integration site 1 [Source:RGD Symbol;Acc:1303040]
Ahi1	chr1	LDG_60min_LTP	171.265	188.679	68	65	3	3	1	1	2	2	0	0	Abelson helper integration site 1 [Source:RGD Symbol;Acc:1303040]
Ahi1	chr1	RDG_10min_no_LTP	123.72	153.567	74	72	2	2	1	1	0	0	1	1	Abelson helper integration site 1 [Source:RGD Symbol;Acc:1303040]
Ahi1	chr1	RDG_60min_no_LTP	147.19	172.202	85	84	1	1	0	0	0	0	1	1	Abelson helper integration site 1 [Source:RGD Symbol;Acc:1303040]
Ahnak	chr1	LDG_10min_LTP	133.59	129.871	19	18	1	1	0	0	0	0	1	1	AHNAK nucleoprotein [Source:RGD Symbol;Acc:619779]
Ahnak	chr1	LDG_60min_LTP	121.41	149.126	14	14	0	0	0	0	0	0	0	0	AHNAK nucleoprotein [Source:RGD Symbol;Acc:619779]
Ahnak	chr1	RDG_10min_no_LTP	92.17	97.2715	13	13	0	0	0	0	0	0	0	0	AHNAK nucleoprotein [Source:RGD Symbol;Acc:619779]
Ahnak	chr1	RDG_60min_no_LTP	136.285	130.351	26	26	0	0	0	0	0	0	0	0	AHNAK nucleoprotein [Source:RGD Symbol;Acc:619779]
Ahnak2	chr6	LDG_10min_LTP	121.62	96.156	5	5	0	0	0	0	0	0	0	0
Ahnak2	chr6	LDG_60min_LTP	54.56	54.56	1	1	0	0	0	0	0	0	0	0
Ahnak2	chr6	RDG_10min_no_LTP	222.22	222.22	1	1	0	0	0	0	0	0	0	0
Ahr	chr6	LDG_10min_LTP	163.165	148.65	4	4	0	0	0	0	0	0	0	0	aryl hydrocarbon receptor [Source:RGD Symbol;Acc:2074]
Ahr	chr6	LDG_60min_LTP	206.72	144.638	5	5	0	0	0	0	0	0	0	0	aryl hydrocarbon receptor [Source:RGD Symbol;Acc:2074]
Ahr	chr6	RDG_10min_no_LTP	89.635	92.95	8	8	0	0	0	0	0	0	0	0	aryl hydrocarbon receptor [Source:RGD Symbol;Acc:2074]
Ahr	chr6	RDG_60min_no_LTP	70.13	75.5533	3	3	0	0	0	0	0	0	0	0	aryl hydrocarbon receptor [Source:RGD Symbol;Acc:2074]
Ahsa1	chr6	LDG_10min_LTP	100.44	112.89	244	236	8	8	3	3	2	2	3	3	activator of Hsp90 ATPase activity 1 [Source:RGD Symbol;Acc:1589285]
Ahsa1	chr6	LDG_60min_LTP	90.2	99.0735	184	178	6	7	4	5	1	1	1	1	activator of Hsp90 ATPase activity 1 [Source:RGD Symbol;Acc:1589285]
Ahsa1	chr6	RDG_10min_no_LTP	102.7	114.299	189	177	12	12	3	3	3	3	6	6	activator of Hsp90 ATPase activity 1 [Source:RGD Symbol;Acc:1589285]
Ahsa1	chr6	RDG_60min_no_LTP	110.2	119.876	305	288	17	19	4	4	5	7	8	8	activator of Hsp90 ATPase activity 1 [Source:RGD Symbol;Acc:1589285]
Ahsa2	chr14	LDG_10min_LTP	101.87	121.477	32	31	1	1	1	1	0	0	0	0	activator of HSP90 ATPase homolog 2 [Source:RGD Symbol;Acc:1307171]
Ahsa2	chr14	LDG_60min_LTP	100.07	123.18	29	28	1	2	0	0	0	0	1	2	activator of HSP90 ATPase homolog 2 [Source:RGD Symbol;Acc:1307171]
Ahsa2	chr14	RDG_10min_no_LTP	92.46	116.406	17	16	1	1	0	0	1	1	0	0	activator of HSP90 ATPase homolog 2 [Source:RGD Symbol;Acc:1307171]
Ahsa2	chr14	RDG_60min_no_LTP	123.47	134.734	52	47	5	5	4	4	0	0	1	1	activator of HSP90 ATPase homolog 2 [Source:RGD Symbol;Acc:1307171]
Ahsp	chr1	LDG_10min_LTP	21.615	21.615	2	2	0	0	0	0	0	0	0	0	alpha hemoglobin stabilizing protein [Source:RGD Symbol;Acc:1306725]
Ahsp	chr1	LDG_60min_LTP	37	37	1	1	0	0	0	0	0	0	0	0	alpha hemoglobin stabilizing protein [Source:RGD Symbol;Acc:1306725]
Aida	chr13	LDG_10min_LTP	78.7	95.088	35	34	1	1	0	0	1	1	0	0	axin interactor, dorsalization associated [Source:RGD Symbol;Acc:1592746]
Aida	chr13	LDG_60min_LTP	78.28	105.265	45	44	1	1	0	0	0	0	1	1	axin interactor, dorsalization associated [Source:RGD Symbol;Acc:1592746]
Aida	chr13	RDG_10min_no_LTP	112.94	113.166	38	38	0	0	0	0	0	0	0	0	axin interactor, dorsalization associated [Source:RGD Symbol;Acc:1592746]
Aida	chr13	RDG_60min_no_LTP	90.96	85.747	37	35	2	2	1	1	0	0	1	1	axin interactor, dorsalization associated [Source:RGD Symbol;Acc:1592746]
Aif1	chr20	LDG_10min_LTP	67.605	84.527	64	62	2	2	0	0	1	1	1	1	allograft inflammatory factor 1 [Source:RGD Symbol;Acc:61924]
Aif1	chr20	LDG_60min_LTP	71.74	77.8314	43	39	4	4	1	1	0	0	3	3	allograft inflammatory factor 1 [Source:RGD Symbol;Acc:61924]
Aif1	chr20	RDG_10min_no_LTP	84.5	90.7695	43	40	3	3	0	0	1	1	2	2	allograft inflammatory factor 1 [Source:RGD Symbol;Acc:61924]
Aif1	chr20	RDG_60min_no_LTP	76.37	88.0315	46	45	1	1	1	1	0	0	0	0	allograft inflammatory factor 1 [Source:RGD Symbol;Acc:61924]
Aif1l	chr3	LDG_10min_LTP	100.625	104.37	8	8	0	0	0	0	0	0	0	0	allograft inflammatory factor 1-like [Source:RGD Symbol;Acc:1305081]
Aif1l	chr3	LDG_60min_LTP	66.04	67.9075	4	4	0	0	0	0	0	0	0	0	allograft inflammatory factor 1-like [Source:RGD Symbol;Acc:1305081]
Aif1l	chr3	RDG_10min_no_LTP	91.83	90.3011	9	9	0	0	0	0	0	0	0	0	allograft inflammatory factor 1-like [Source:RGD Symbol;Acc:1305081]
Aif1l	chr3	RDG_60min_no_LTP	77.5	74.02	5	5	0	0	0	0	0	0	0	0	allograft inflammatory factor 1-like [Source:RGD Symbol;Acc:1305081]
Aifm1	chrX	LDG_10min_LTP	137.065	138.338	38	35	3	3	2	2	0	0	1	1	apoptosis inducing factor, mitochondria associated 1 [Source:RGD Symbol;Acc:620817]
Aifm1	chrX	LDG_60min_LTP	79.08	87.0883	29	29	0	0	0	0	0	0	0	0	apoptosis inducing factor, mitochondria associated 1 [Source:RGD Symbol;Acc:620817]
Aifm1	chrX	RDG_10min_no_LTP	102.64	114.29	24	22	2	2	1	1	0	0	1	1	apoptosis inducing factor, mitochondria associated 1 [Source:RGD Symbol;Acc:620817]
Aifm1	chrX	RDG_60min_no_LTP	123.03	125.789	37	37	0	0	0	0	0	0	0	0	apoptosis inducing factor, mitochondria associated 1 [Source:RGD Symbol;Acc:620817]
Aifm2	chr20	LDG_10min_LTP	114.45	153.001	7	7	0	0	0	0	0	0	0	0	apoptosis inducing factor, mitochondria associated 2 [Source:RGD Symbol;Acc:1304964]
Aifm2	chr20	LDG_60min_LTP	106.92	110.176	7	7	0	0	0	0	0	0	0	0	apoptosis inducing factor, mitochondria associated 2 [Source:RGD Symbol;Acc:1304964]
Aifm2	chr20	RDG_10min_no_LTP	144.72	117.09	3	3	0	0	0	0	0	0	0	0	apoptosis inducing factor, mitochondria associated 2 [Source:RGD Symbol;Acc:1304964]
Aifm2	chr20	RDG_60min_no_LTP	93	116.52	7	7	0	0	0	0	0	0	0	0	apoptosis inducing factor, mitochondria associated 2 [Source:RGD Symbol;Acc:1304964]
Aifm3	chr11	LDG_10min_LTP	111.425	117.599	48	46	2	2	0	0	1	1	1	1	apoptosis inducing factor, mitochondria associated 3 [Source:RGD Symbol;Acc:1306028]
Aifm3	chr11	LDG_60min_LTP	113.685	130.902	36	33	3	5	1	2	1	1	2	2	apoptosis inducing factor, mitochondria associated 3 [Source:RGD Symbol;Acc:1306028]
Aifm3	chr11	RDG_10min_no_LTP	94.24	120.031	31	31	0	0	0	0	0	0	0	0	apoptosis inducing factor, mitochondria associated 3 [Source:RGD Symbol;Acc:1306028]
Aifm3	chr11	RDG_60min_no_LTP	97.38	135.096	59	57	2	2	0	0	2	2	0	0	apoptosis inducing factor, mitochondria associated 3 [Source:RGD Symbol;Acc:1306028]
Aig1	chr1	LDG_10min_LTP	101.185	112.314	134	132	2	3	1	1	0	0	2	2	androgen-induced 1 [Source:RGD Symbol;Acc:1562920]
Aig1	chr1	LDG_60min_LTP	83.17	100.38	131	128	3	3	3	3	0	0	0	0	androgen-induced 1 [Source:RGD Symbol;Acc:1562920]
Aig1	chr1	RDG_10min_no_LTP	96.695	109.844	100	95	5	7	2	3	0	0	4	4	androgen-induced 1 [Source:RGD Symbol;Acc:1562920]
Aig1	chr1	RDG_60min_no_LTP	97.83	110.224	185	178	7	7	3	3	4	4	0	0	androgen-induced 1 [Source:RGD Symbol;Acc:1562920]
Aim2	chr13	LDG_60min_LTP	114.12	114.12	1	0	1	1	0	0	1	1	0	0	absent in melanoma 2 [Source:RGD Symbol;Acc:1307283]
Aim2	chr13	RDG_10min_no_LTP	92.08	92.08	1	1	0	0	0	0	0	0	0	0	absent in melanoma 2 [Source:RGD Symbol;Acc:1307283]
Aim2	chr13	RDG_60min_no_LTP	39.89	58.4467	3	3	0	0	0	0	0	0	0	0	absent in melanoma 2 [Source:RGD Symbol;Acc:1307283]
Aimp1	chr2	LDG_10min_LTP	71.41	90.7607	92	92	0	0	0	0	0	0	0	0	aminoacyl tRNA synthetase complex-interacting multifunctional protein 1 [Source:RGD Symbol;Acc:620466]
Aimp1	chr2	LDG_60min_LTP	50.345	79.0324	82	80	2	3	2	3	0	0	0	0	aminoacyl tRNA synthetase complex-interacting multifunctional protein 1 [Source:RGD Symbol;Acc:620466]
Aimp1	chr2	RDG_10min_no_LTP	77.14	93.5111	79	75	4	5	2	2	1	1	2	2	aminoacyl tRNA synthetase complex-interacting multifunctional protein 1 [Source:RGD Symbol;Acc:620466]
Aimp1	chr2	RDG_60min_no_LTP	57.54	83.6844	103	101	2	2	1	1	1	1	0	0	aminoacyl tRNA synthetase complex-interacting multifunctional protein 1 [Source:RGD Symbol;Acc:620466]
Aimp2	chr12	LDG_10min_LTP	82.48	94.6787	89	88	1	1	1	1	0	0	0	0	aminoacyl tRNA synthetase complex-interacting multifunctional protein 2 [Source:RGD Symbol;Acc:1560787]
Aimp2	chr12	LDG_60min_LTP	82.95	98.0317	75	75	0	0	0	0	0	0	0	0	aminoacyl tRNA synthetase complex-interacting multifunctional protein 2 [Source:RGD Symbol;Acc:1560787]
Aimp2	chr12	RDG_10min_no_LTP	80.33	93.3449	59	59	0	0	0	0	0	0	0	0	aminoacyl tRNA synthetase complex-interacting multifunctional protein 2 [Source:RGD Symbol;Acc:1560787]
Aimp2	chr12	RDG_60min_no_LTP	97.305	111.418	102	97	5	5	3	3	1	1	1	1	aminoacyl tRNA synthetase complex-interacting multifunctional protein 2 [Source:RGD Symbol;Acc:1560787]
Aip	chr1	LDG_10min_LTP	94.53	98.4259	107	103	4	4	2	2	1	1	1	1	aryl-hydrocarbon receptor-interacting protein [Source:RGD Symbol;Acc:628619]
Aip	chr1	LDG_60min_LTP	85.365	97.1081	62	60	2	3	1	1	1	2	0	0	aryl-hydrocarbon receptor-interacting protein [Source:RGD Symbol;Acc:628619]
Aip	chr1	RDG_10min_no_LTP	101.75	115.534	76	71	5	5	3	3	1	1	1	1	aryl-hydrocarbon receptor-interacting protein [Source:RGD Symbol;Acc:628619]
Aip	chr1	RDG_60min_no_LTP	106.04	114.252	95	93	2	2	2	2	0	0	0	0	aryl-hydrocarbon receptor-interacting protein [Source:RGD Symbol;Acc:628619]
Ajap1	chr5	LDG_10min_LTP	101.55	103.252	74	73	1	1	0	0	1	1	0	0	adherens junctions associated protein 1 [Source:RGD Symbol;Acc:1590138]
Ajap1	chr5	LDG_60min_LTP	80.79	93.8957	51	51	0	0	0	0	0	0	0	0	adherens junctions associated protein 1 [Source:RGD Symbol;Acc:1590138]
Ajap1	chr5	RDG_10min_no_LTP	100.64	107.73	45	44	1	1	0	0	0	0	1	1	adherens junctions associated protein 1 [Source:RGD Symbol;Acc:1590138]
Ajap1	chr5	RDG_60min_no_LTP	111.97	113.364	66	65	1	2	0	0	1	2	0	0	adherens junctions associated protein 1 [Source:RGD Symbol;Acc:1590138]
Ajm1	chr3	LDG_10min_LTP	121.625	128.03	90	86	4	4	0	0	2	2	2	2	apical junction component 1 homolog [Source:RGD Symbol;Acc:1560470]
Ajm1	chr3	LDG_60min_LTP	91.185	107.624	58	57	1	1	0	0	1	1	0	0	apical junction component 1 homolog [Source:RGD Symbol;Acc:1560470]
Ajm1	chr3	RDG_10min_no_LTP	111.19	123.892	65	63	2	2	1	1	1	1	0	0	apical junction component 1 homolog [Source:RGD Symbol;Acc:1560470]
Ajm1	chr3	RDG_60min_no_LTP	114.45	138.111	111	108	3	3	3	3	0	0	0	0	apical junction component 1 homolog [Source:RGD Symbol;Acc:1560470]
Ajuba	chr15	LDG_10min_LTP	108.35	84.6867	3	3	0	0	0	0	0	0	0	0	ajuba LIM protein [Source:RGD Symbol;Acc:620407]
Ajuba	chr15	LDG_60min_LTP	185.43	185.43	1	1	0	0	0	0	0	0	0	0	ajuba LIM protein [Source:RGD Symbol;Acc:620407]
Ajuba	chr15	RDG_10min_no_LTP	156.625	156.625	2	2	0	0	0	0	0	0	0	0	ajuba LIM protein [Source:RGD Symbol;Acc:620407]
Ajuba	chr15	RDG_60min_no_LTP	41.21	41.21	1	1	0	0	0	0	0	0	0	0	ajuba LIM protein [Source:RGD Symbol;Acc:620407]
Ak1	chr3	LDG_10min_LTP	98.63	107.839	229	220	9	9	4	4	2	2	3	3
Ak1	chr3	LDG_60min_LTP	92.89	106.273	180	174	6	8	2	2	0	0	4	6
Ak1	chr3	RDG_10min_no_LTP	112.19	122.505	199	195	4	4	2	2	2	2	0	0
Ak1	chr3	RDG_60min_no_LTP	122.42	129.53	295	287	8	9	3	3	2	3	3	3
Ak2	chr5	LDG_10min_LTP	92.01	88.0633	18	17	1	1	0	0	0	0	1	1	adenylate kinase 2 [Source:RGD Symbol;Acc:2077]
Ak2	chr5	LDG_60min_LTP	57.135	78.1469	16	16	0	0	0	0	0	0	0	0	adenylate kinase 2 [Source:RGD Symbol;Acc:2077]
Ak2	chr5	RDG_10min_no_LTP	79.98	103.852	22	22	0	0	0	0	0	0	0	0	adenylate kinase 2 [Source:RGD Symbol;Acc:2077]
Ak2	chr5	RDG_60min_no_LTP	88.07	108.137	16	15	1	1	1	1	0	0	0	0	adenylate kinase 2 [Source:RGD Symbol;Acc:2077]
Ak3	chr1	LDG_10min_LTP	90.055	105.005	80	79	1	1	0	0	1	1	0	0	adenylate kinase 3 [Source:RGD Symbol;Acc:619885]
Ak3	chr1	LDG_60min_LTP	83.15	95.0804	53	52	1	1	0	0	1	1	0	0	adenylate kinase 3 [Source:RGD Symbol;Acc:619885]
Ak3	chr1	RDG_10min_no_LTP	98.925	102.95	50	46	4	6	2	2	2	3	1	1	adenylate kinase 3 [Source:RGD Symbol;Acc:619885]
Ak3	chr1	RDG_60min_no_LTP	107.77	112.162	79	75	4	4	1	1	1	1	2	2	adenylate kinase 3 [Source:RGD Symbol;Acc:619885]
Ak4	chr5	LDG_10min_LTP	97.115	104.546	62	61	1	1	1	1	0	0	0	0	adenylate kinase 4 [Source:RGD Symbol;Acc:2078]
Ak4	chr5	LDG_60min_LTP	102.5	114.52	67	65	2	2	1	1	1	1	0	0	adenylate kinase 4 [Source:RGD Symbol;Acc:2078]
Ak4	chr5	RDG_10min_no_LTP	76.25	96.3515	53	53	0	0	0	0	0	0	0	0	adenylate kinase 4 [Source:RGD Symbol;Acc:2078]
Ak4	chr5	RDG_60min_no_LTP	123.15	120.874	99	94	5	6	2	2	2	2	2	2	adenylate kinase 4 [Source:RGD Symbol;Acc:2078]
Ak5	chr2	LDG_10min_LTP	113.33	122.033	281	274	7	9	0	0	6	7	1	2	adenylate kinase 5 [Source:RGD Symbol;Acc:1590818]
Ak5	chr2	LDG_60min_LTP	105.43	113.746	295	287	8	11	2	2	4	5	4	4	adenylate kinase 5 [Source:RGD Symbol;Acc:1590818]
Ak5	chr2	RDG_10min_no_LTP	123.58	132.128	219	215	4	4	0	0	3	3	1	1	adenylate kinase 5 [Source:RGD Symbol;Acc:1590818]
Ak5	chr2	RDG_60min_no_LTP	115.27	128.647	348	341	7	7	0	0	5	5	2	2	adenylate kinase 5 [Source:RGD Symbol;Acc:1590818]
Ak6	chr2	LDG_10min_LTP	84.45	96.9361	51	51	0	0	0	0	0	0	0	0	adenylate kinase 6 [Source:RGD Symbol;Acc:7387335]
Ak6	chr2	LDG_60min_LTP	102.75	99.4537	41	40	1	1	0	0	1	1	0	0	adenylate kinase 6 [Source:RGD Symbol;Acc:7387335]
Ak6	chr2	RDG_10min_no_LTP	89.59	104.908	33	32	1	2	0	0	1	2	0	0	adenylate kinase 6 [Source:RGD Symbol;Acc:7387335]
Ak6	chr2	RDG_60min_no_LTP	100.9	117.202	56	54	2	2	0	0	0	0	2	2	adenylate kinase 6 [Source:RGD Symbol;Acc:7387335]
Ak7	chr6	LDG_10min_LTP	135.77	135.77	1	1	0	0	0	0	0	0	0	0	adenylate kinase 7 [Source:RGD Symbol;Acc:1309600]
Ak7	chr6	RDG_10min_no_LTP	112.96	112.96	1	1	0	0	0	0	0	0	0	0	adenylate kinase 7 [Source:RGD Symbol;Acc:1309600]
Ak8	chr3	LDG_10min_LTP	77.84	77.84	1	1	0	0	0	0	0	0	0	0	adenylate kinase 8 [Source:RGD Symbol;Acc:1303144]
Ak8	chr3	LDG_60min_LTP	148.21	149.277	3	2	1	1	1	1	0	0	0	0	adenylate kinase 8 [Source:RGD Symbol;Acc:1303144]
Ak8	chr3	RDG_60min_no_LTP	142.22	142.22	1	0	1	1	0	0	0	0	1	1	adenylate kinase 8 [Source:RGD Symbol;Acc:1303144]
Ak9	chr20	LDG_10min_LTP	87.765	87.765	2	2	0	0	0	0	0	0	0	0	adenylate kinase 9 [Source:RGD Symbol;Acc:1559879]
Akain1	chr9	LDG_10min_LTP	192.11	192.11	2	2	0	0	0	0	0	0	0	0	A-kinase anchor inhibitor 1 [Source:RGD Symbol;Acc:2324352]
Akain1	chr9	LDG_60min_LTP	233.5	233.5	1	1	0	0	0	0	0	0	0	0	A-kinase anchor inhibitor 1 [Source:RGD Symbol;Acc:2324352]
Akain1	chr9	RDG_60min_no_LTP	119.445	120.252	4	4	0	0	0	0	0	0	0	0	A-kinase anchor inhibitor 1 [Source:RGD Symbol;Acc:2324352]
Akap1	chr10	LDG_10min_LTP	123.235	133.413	38	37	1	2	1	1	1	1	0	0	A-kinase anchoring protein 1 [Source:RGD Symbol;Acc:620826]
Akap1	chr10	LDG_60min_LTP	107.145	124.152	26	24	2	2	1	1	1	1	0	0	A-kinase anchoring protein 1 [Source:RGD Symbol;Acc:620826]
Akap1	chr10	RDG_10min_no_LTP	116.34	121.237	33	32	1	1	1	1	0	0	0	0	A-kinase anchoring protein 1 [Source:RGD Symbol;Acc:620826]
Akap1	chr10	RDG_60min_no_LTP	109.68	124.837	51	50	1	1	0	0	0	0	1	1	A-kinase anchoring protein 1 [Source:RGD Symbol;Acc:620826]
Akap10	chr10	LDG_10min_LTP	152.31	145.831	31	31	0	0	0	0	0	0	0	0	A-kinase anchoring protein 10 [Source:RGD Symbol;Acc:1308869]
Akap10	chr10	LDG_60min_LTP	110.135	98.984	20	18	2	2	1	1	1	1	0	0	A-kinase anchoring protein 10 [Source:RGD Symbol;Acc:1308869]
Akap10	chr10	RDG_10min_no_LTP	163.36	171.552	26	25	1	1	0	0	0	0	1	1	A-kinase anchoring protein 10 [Source:RGD Symbol;Acc:1308869]
Akap10	chr10	RDG_60min_no_LTP	86.765	116.761	42	40	2	2	0	0	1	1	1	1	A-kinase anchoring protein 10 [Source:RGD Symbol;Acc:1308869]
Akap11	chr15	LDG_10min_LTP	101.42	118.942	231	228	3	3	1	1	2	2	0	0	A-kinase anchoring protein 11 [Source:RGD Symbol;Acc:2079]
Akap11	chr15	LDG_60min_LTP	89.86	110.089	216	213	3	3	2	2	0	0	1	1	A-kinase anchoring protein 11 [Source:RGD Symbol;Acc:2079]
Akap11	chr15	RDG_10min_no_LTP	106.62	124.927	166	157	9	13	0	0	6	9	3	4	A-kinase anchoring protein 11 [Source:RGD Symbol;Acc:2079]
Akap11	chr15	RDG_60min_no_LTP	112.905	129.242	286	278	8	11	1	2	4	6	3	3	A-kinase anchoring protein 11 [Source:RGD Symbol;Acc:2079]
Akap12	chr1	LDG_10min_LTP	114.18	102.525	17	17	0	0	0	0	0	0	0	0	A-kinase anchoring protein 12 [Source:RGD Symbol;Acc:70988]
Akap12	chr1	LDG_60min_LTP	108.47	145.458	8	8	0	0	0	0	0	0	0	0	A-kinase anchoring protein 12 [Source:RGD Symbol;Acc:70988]
Akap12	chr1	RDG_10min_no_LTP	106.82	130.445	13	13	0	0	0	0	0	0	0	0	A-kinase anchoring protein 12 [Source:RGD Symbol;Acc:70988]
Akap12	chr1	RDG_60min_no_LTP	78.08	98.91	17	17	0	0	0	0	0	0	0	0	A-kinase anchoring protein 12 [Source:RGD Symbol;Acc:70988]
Akap13	chr1	LDG_10min_LTP	171.405	148.162	18	17	1	1	0	0	0	0	1	1	A-kinase anchoring protein 13 [Source:RGD Symbol;Acc:727893]
Akap13	chr1	LDG_60min_LTP	219.37	185.5	27	25	2	2	2	2	0	0	0	0	A-kinase anchoring protein 13 [Source:RGD Symbol;Acc:727893]
Akap13	chr1	RDG_10min_no_LTP	134.81	150.795	17	17	0	0	0	0	0	0	0	0	A-kinase anchoring protein 13 [Source:RGD Symbol;Acc:727893]
Akap13	chr1	RDG_60min_no_LTP	165.095	174.276	32	30	2	2	0	0	0	0	2	2	A-kinase anchoring protein 13 [Source:RGD Symbol;Acc:727893]
Akap17a	chr12	LDG_10min_LTP	90.92	98.5033	55	55	0	0	0	0	0	0	0	0	A-kinase anchoring protein 17A [Source:RGD Symbol;Acc:1564640]
Akap17a	chr12	LDG_60min_LTP	83.38	102.909	63	63	0	0	0	0	0	0	0	0	A-kinase anchoring protein 17A [Source:RGD Symbol;Acc:1564640]
Akap17a	chr12	RDG_10min_no_LTP	84.645	92.5479	48	46	2	2	2	2	0	0	0	0	A-kinase anchoring protein 17A [Source:RGD Symbol;Acc:1564640]
Akap17a	chr12	RDG_60min_no_LTP	81.72	102.127	75	73	2	2	1	1	1	1	0	0	A-kinase anchoring protein 17A [Source:RGD Symbol;Acc:1564640]
Akap17b	chrX	LDG_10min_LTP	135.68	150.602	11	11	0	0	0	0	0	0	0	0	A kinase (PRKA) anchor protein 17B [Source:RGD Symbol;Acc:1566363]
Akap17b	chrX	LDG_60min_LTP	118.42	166.33	11	11	0	0	0	0	0	0	0	0	A kinase (PRKA) anchor protein 17B [Source:RGD Symbol;Acc:1566363]
Akap17b	chrX	RDG_10min_no_LTP	68.41	100.291	11	10	1	3	0	0	1	3	0	0	A kinase (PRKA) anchor protein 17B [Source:RGD Symbol;Acc:1566363]
Akap17b	chrX	RDG_60min_no_LTP	86.58	112.397	23	20	3	3	2	2	0	0	1	1	A kinase (PRKA) anchor protein 17B [Source:RGD Symbol;Acc:1566363]
Akap2	chr5	LDG_10min_LTP	79.06	108.583	25	24	1	1	1	1	0	0	0	0	A-kinase anchoring protein 2 [Source:RGD Symbol;Acc:1305135]
Akap2	chr5	LDG_60min_LTP	109.99	120.872	38	38	0	0	0	0	0	0	0	0	A-kinase anchoring protein 2 [Source:RGD Symbol;Acc:1305135]
Akap2	chr5	RDG_10min_no_LTP	107.83	126.692	32	28	4	4	3	3	0	0	1	1	A-kinase anchoring protein 2 [Source:RGD Symbol;Acc:1305135]
Akap2	chr5	RDG_60min_no_LTP	93.425	110.473	50	49	1	1	1	1	0	0	0	0	A-kinase anchoring protein 2 [Source:RGD Symbol;Acc:1305135]
Akap3	chr4	LDG_10min_LTP	143.07	143.07	1	1	0	0	0	0	0	0	0	0	A-kinase anchoring protein 3 [Source:RGD Symbol;Acc:1359735]
Akap3	chr4	RDG_10min_no_LTP	136.17	131.923	3	3	0	0	0	0	0	0	0	0	A-kinase anchoring protein 3 [Source:RGD Symbol;Acc:1359735]
Akap3	chr4	RDG_60min_no_LTP	75.155	75.155	2	2	0	0	0	0	0	0	0	0	A-kinase anchoring protein 3 [Source:RGD Symbol;Acc:1359735]
Akap5	chr6	LDG_10min_LTP	101.69	107.366	27	27	0	0	0	0	0	0	0	0	A-kinase anchoring protein 5 [Source:RGD Symbol;Acc:620829]
Akap5	chr6	LDG_60min_LTP	91.6	101.384	29	27	2	2	2	2	0	0	0	0	A-kinase anchoring protein 5 [Source:RGD Symbol;Acc:620829]
Akap5	chr6	RDG_10min_no_LTP	117.185	114.919	42	41	1	1	0	0	0	0	1	1	A-kinase anchoring protein 5 [Source:RGD Symbol;Acc:620829]
Akap5	chr6	RDG_60min_no_LTP	99.16	115.218	45	44	1	3	1	2	0	0	1	1	A-kinase anchoring protein 5 [Source:RGD Symbol;Acc:620829]
Akap6	chr6	LDG_10min_LTP	111.25	118.743	153	142	11	14	4	4	4	6	4	4	A-kinase anchoring protein 6 [Source:RGD Symbol;Acc:69412]
Akap6	chr6	LDG_60min_LTP	121.7	127.685	120	111	9	12	6	6	2	3	2	3	A-kinase anchoring protein 6 [Source:RGD Symbol;Acc:69412]
Akap6	chr6	RDG_10min_no_LTP	112.76	121.175	131	126	5	5	0	0	3	3	2	2	A-kinase anchoring protein 6 [Source:RGD Symbol;Acc:69412]
Akap6	chr6	RDG_60min_no_LTP	122.78	125.109	205	189	16	20	7	8	6	7	5	5	A-kinase anchoring protein 6 [Source:RGD Symbol;Acc:69412]
Akap7	chr1	LDG_10min_LTP	131.275	126.975	44	42	2	2	0	0	1	1	1	1	A-kinase anchoring protein 7 [Source:RGD Symbol;Acc:1303071]
Akap7	chr1	LDG_60min_LTP	122.62	126.628	29	29	0	0	0	0	0	0	0	0	A-kinase anchoring protein 7 [Source:RGD Symbol;Acc:1303071]
Akap7	chr1	RDG_10min_no_LTP	95.29	103.564	60	59	1	1	0	0	1	1	0	0	A-kinase anchoring protein 7 [Source:RGD Symbol;Acc:1303071]
Akap7	chr1	RDG_60min_no_LTP	102.92	109.034	78	77	1	1	0	0	1	1	0	0	A-kinase anchoring protein 7 [Source:RGD Symbol;Acc:1303071]
Akap8	chr7	LDG_10min_LTP	159.64	172.638	31	28	3	3	1	1	1	1	1	1	A-kinase anchoring protein 8 [Source:RGD Symbol;Acc:620832]
Akap8	chr7	LDG_60min_LTP	155.84	156.207	35	34	1	1	1	1	0	0	0	0	A-kinase anchoring protein 8 [Source:RGD Symbol;Acc:620832]
Akap8	chr7	RDG_10min_no_LTP	207.23	176.808	25	24	1	1	0	0	1	1	0	0	A-kinase anchoring protein 8 [Source:RGD Symbol;Acc:620832]
Akap8	chr7	RDG_60min_no_LTP	190.54	176.781	37	36	1	1	0	0	0	0	1	1	A-kinase anchoring protein 8 [Source:RGD Symbol;Acc:620832]
Akap8l	chr7	LDG_10min_LTP	160.685	180.727	74	71	3	3	2	2	0	0	1	1	A-kinase anchoring protein 8 like [Source:RGD Symbol;Acc:1359200]
Akap8l	chr7	LDG_60min_LTP	202.56	185.84	63	61	2	2	1	1	1	1	0	0	A-kinase anchoring protein 8 like [Source:RGD Symbol;Acc:1359200]
Akap8l	chr7	RDG_10min_no_LTP	174.45	165.319	51	50	1	1	0	0	1	1	0	0	A-kinase anchoring protein 8 like [Source:RGD Symbol;Acc:1359200]
Akap8l	chr7	RDG_60min_no_LTP	215.3	194.254	71	66	5	6	2	2	3	3	1	1	A-kinase anchoring protein 8 like [Source:RGD Symbol;Acc:1359200]
Akap9	chr4	LDG_10min_LTP	164.6	154.95	45	45	0	0	0	0	0	0	0	0	A-kinase anchoring protein 9 [Source:RGD Symbol;Acc:620833]
Akap9	chr4	LDG_60min_LTP	122.29	135.713	33	33	0	0	0	0	0	0	0	0	A-kinase anchoring protein 9 [Source:RGD Symbol;Acc:620833]
Akap9	chr4	RDG_10min_no_LTP	81.24	112.143	39	38	1	1	0	0	1	1	0	0	A-kinase anchoring protein 9 [Source:RGD Symbol;Acc:620833]
Akap9	chr4	RDG_60min_no_LTP	133.055	128.159	44	41	3	3	2	2	0	0	1	1	A-kinase anchoring protein 9 [Source:RGD Symbol;Acc:620833]
Akip1	chr1	LDG_10min_LTP	94.985	108.402	16	16	0	0	0	0	0	0	0	0	A-kinase interacting protein 1 [Source:RGD Symbol;Acc:1306959]
Akip1	chr1	LDG_60min_LTP	103.3	125.211	12	10	2	3	0	0	2	3	0	0	A-kinase interacting protein 1 [Source:RGD Symbol;Acc:1306959]
Akip1	chr1	RDG_10min_no_LTP	118.7	125.928	13	13	0	0	0	0	0	0	0	0	A-kinase interacting protein 1 [Source:RGD Symbol;Acc:1306959]
Akip1	chr1	RDG_60min_no_LTP	96.74	121.928	24	24	0	0	0	0	0	0	0	0	A-kinase interacting protein 1 [Source:RGD Symbol;Acc:1306959]
Akirin1	chr5	LDG_10min_LTP	117.705	128.09	236	226	10	11	4	4	2	3	4	4	akirin 1 [Source:RGD Symbol;Acc:1585989]
Akirin1	chr5	LDG_60min_LTP	117.925	124.713	220	214	6	6	2	2	3	3	1	1	akirin 1 [Source:RGD Symbol;Acc:1585989]
Akirin1	chr5	RDG_10min_no_LTP	101.24	112.595	106	106	0	0	0	0	0	0	0	0	akirin 1 [Source:RGD Symbol;Acc:1585989]
Akirin1	chr5	RDG_60min_no_LTP	128.85	123.062	145	140	5	5	2	2	3	3	0	0	akirin 1 [Source:RGD Symbol;Acc:1585989]
Akirin2	chr5	LDG_10min_LTP	95	112.271	137	135	2	3	0	0	0	0	2	3	akirin 2 [Source:RGD Symbol;Acc:1307791]
Akirin2	chr5	LDG_60min_LTP	115.425	122.196	106	105	1	1	1	1	0	0	0	0	akirin 2 [Source:RGD Symbol;Acc:1307791]
Akirin2	chr5	RDG_10min_no_LTP	102.79	115.073	103	101	2	2	0	0	2	2	0	0	akirin 2 [Source:RGD Symbol;Acc:1307791]
Akirin2	chr5	RDG_60min_no_LTP	105.62	114.17	158	153	5	5	1	1	3	3	1	1	akirin 2 [Source:RGD Symbol;Acc:1307791]
Akna	chr5	LDG_10min_LTP	111.74	136.459	7	7	0	0	0	0	0	0	0	0	AT-hook transcription factor [Source:RGD Symbol;Acc:1308202]
Akna	chr5	LDG_60min_LTP	202.745	202.745	2	2	0	0	0	0	0	0	0	0	AT-hook transcription factor [Source:RGD Symbol;Acc:1308202]
Akna	chr5	RDG_10min_no_LTP	158.19	164.71	4	4	0	0	0	0	0	0	0	0	AT-hook transcription factor [Source:RGD Symbol;Acc:1308202]
Akna	chr5	RDG_60min_no_LTP	154.23	126.724	7	5	2	2	2	2	0	0	0	0	AT-hook transcription factor [Source:RGD Symbol;Acc:1308202]
Aknad1	chr2	RDG_60min_no_LTP	297.3	297.3	1	1	0	0	0	0	0	0	0	0	AKNA domain containing 1 [Source:RGD Symbol;Acc:1583957]
Akr1a1	chr5	LDG_10min_LTP	97	104.688	912	887	25	27	13	13	9	10	4	4	aldo-keto reductase family 1 member A1 [Source:RGD Symbol;Acc:68346]
Akr1a1	chr5	LDG_60min_LTP	92.97	102.607	735	709	26	30	13	15	5	7	8	8	aldo-keto reductase family 1 member A1 [Source:RGD Symbol;Acc:68346]
Akr1a1	chr5	RDG_10min_no_LTP	97.89	104.621	732	701	31	34	17	17	7	10	7	7	aldo-keto reductase family 1 member A1 [Source:RGD Symbol;Acc:68346]
Akr1a1	chr5	RDG_60min_no_LTP	98.04	104.928	974	931	43	50	19	21	17	19	9	10	aldo-keto reductase family 1 member A1 [Source:RGD Symbol;Acc:68346]
Akr1b1	chr4	LDG_10min_LTP	93.24	107.784	113	110	3	3	1	1	0	0	2	2	aldo-keto reductase family 1 member B1 [Source:RGD Symbol;Acc:2092]
Akr1b1	chr4	LDG_60min_LTP	89.18	88.6701	77	75	2	2	1	1	1	1	0	0	aldo-keto reductase family 1 member B1 [Source:RGD Symbol;Acc:2092]
Akr1b1	chr4	RDG_10min_no_LTP	105.235	113.968	82	81	1	1	1	1	0	0	0	0	aldo-keto reductase family 1 member B1 [Source:RGD Symbol;Acc:2092]
Akr1b1	chr4	RDG_60min_no_LTP	96.73	104.587	135	133	2	2	1	1	1	1	0	0	aldo-keto reductase family 1 member B1 [Source:RGD Symbol;Acc:2092]
Akr1b10	chr4	LDG_10min_LTP	106.125	128.702	32	32	0	0	0	0	0	0	0	0	aldo-keto reductase family 1 member B10 [Source:RGD Symbol;Acc:1308277]
Akr1b10	chr4	LDG_60min_LTP	117.37	117.3	23	21	2	2	1	1	0	0	1	1	aldo-keto reductase family 1 member B10 [Source:RGD Symbol;Acc:1308277]
Akr1b10	chr4	RDG_10min_no_LTP	95.725	119.624	26	25	1	2	0	0	0	0	1	2	aldo-keto reductase family 1 member B10 [Source:RGD Symbol;Acc:1308277]
Akr1b10	chr4	RDG_60min_no_LTP	124.93	137.471	27	26	1	3	1	1	1	2	0	0	aldo-keto reductase family 1 member B10 [Source:RGD Symbol;Acc:1308277]
Akr1b7	chr4	RDG_60min_no_LTP	188.76	188.76	1	1	0	0	0	0	0	0	0	0	aldo-keto reductase family 1, member B7 [Source:RGD Symbol;Acc:620257]
Akr1b8	chr4	LDG_60min_LTP	125.77	125.77	1	1	0	0	0	0	0	0	0	0	aldo-keto reductase family 1, member B8 [Source:RGD Symbol;Acc:708475]
Akr1c14	chr17	LDG_10min_LTP	175.96	177.565	17	17	0	0	0	0	0	0	0	0	aldo-keto reductase family 1, member C14 [Source:RGD Symbol;Acc:708361]
Akr1c14	chr17	LDG_60min_LTP	143.02	144.009	8	8	0	0	0	0	0	0	0	0	aldo-keto reductase family 1, member C14 [Source:RGD Symbol;Acc:708361]
Akr1c14	chr17	RDG_10min_no_LTP	129.58	111.504	9	8	1	1	1	1	0	0	0	0	aldo-keto reductase family 1, member C14 [Source:RGD Symbol;Acc:708361]
Akr1c14	chr17	RDG_60min_no_LTP	196.09	178.526	27	27	0	0	0	0	0	0	0	0	aldo-keto reductase family 1, member C14 [Source:RGD Symbol;Acc:708361]
Akr1c15	chr17	LDG_10min_LTP	112.54	103.66	3	3	0	0	0	0	0	0	0	0	aldo-keto reductase family 1, member C15 [Source:RGD Symbol;Acc:1307514]
Akr1c15	chr17	LDG_60min_LTP	108.505	117.685	4	4	0	0	0	0	0	0	0	0	aldo-keto reductase family 1, member C15 [Source:RGD Symbol;Acc:1307514]
Akr1c15	chr17	RDG_10min_no_LTP	68.26	93.9429	7	7	0	0	0	0	0	0	0	0	aldo-keto reductase family 1, member C15 [Source:RGD Symbol;Acc:1307514]
Akr1c15	chr17	RDG_60min_no_LTP	61.285	78.776	10	9	1	1	1	1	0	0	0	0	aldo-keto reductase family 1, member C15 [Source:RGD Symbol;Acc:1307514]
Akr1c19	chr17	LDG_10min_LTP	105.77	114.47	3	3	0	0	0	0	0	0	0	0	aldo-keto reductase family 1, member C19 [Source:RGD Symbol;Acc:1562954]
Akr1c19	chr17	LDG_60min_LTP	99.47	99.47	1	1	0	0	0	0	0	0	0	0	aldo-keto reductase family 1, member C19 [Source:RGD Symbol;Acc:1562954]
Akr1c19	chr17	RDG_10min_no_LTP	78.6	76.15	3	3	0	0	0	0	0	0	0	0	aldo-keto reductase family 1, member C19 [Source:RGD Symbol;Acc:1562954]
Akr1c19	chr17	RDG_60min_no_LTP	71.185	71.185	2	2	0	0	0	0	0	0	0	0	aldo-keto reductase family 1, member C19 [Source:RGD Symbol;Acc:1562954]
Akr1d1	chr4	LDG_10min_LTP	157.7	163.636	5	5	0	0	0	0	0	0	0	0	aldo-keto reductase family 1, member D1 [Source:RGD Symbol;Acc:620752]
Akr1d1	chr4	LDG_60min_LTP	180.04	191.196	5	5	0	0	0	0	0	0	0	0	aldo-keto reductase family 1, member D1 [Source:RGD Symbol;Acc:620752]
Akr1d1	chr4	RDG_10min_no_LTP	212.82	212.82	2	1	1	1	0	0	0	0	1	1	aldo-keto reductase family 1, member D1 [Source:RGD Symbol;Acc:620752]
Akr1d1	chr4	RDG_60min_no_LTP	193.79	186.517	3	3	0	0	0	0	0	0	0	0	aldo-keto reductase family 1, member D1 [Source:RGD Symbol;Acc:620752]
Akr1e2	chr17	LDG_10min_LTP	96	120.39	35	34	1	1	1	1	0	0	0	0	aldo-keto reductase family 1, member E2 [Source:RGD Symbol;Acc:1309599]
Akr1e2	chr17	LDG_60min_LTP	152.135	149.129	16	15	1	2	1	1	0	0	1	1	aldo-keto reductase family 1, member E2 [Source:RGD Symbol;Acc:1309599]
Akr1e2	chr17	RDG_10min_no_LTP	170.12	152.264	9	9	0	0	0	0	0	0	0	0	aldo-keto reductase family 1, member E2 [Source:RGD Symbol;Acc:1309599]
Akr1e2	chr17	RDG_60min_no_LTP	148.36	143.038	27	27	0	0	0	0	0	0	0	0	aldo-keto reductase family 1, member E2 [Source:RGD Symbol;Acc:1309599]
Akr7a2	chr5	LDG_10min_LTP	82.62	87.4864	59	58	1	1	1	1	0	0	0	0	aldo-keto reductase family 7, member A2 [Source:RGD Symbol;Acc:620311]
Akr7a2	chr5	LDG_60min_LTP	99.35	97.7844	61	59	2	2	1	1	1	1	0	0	aldo-keto reductase family 7, member A2 [Source:RGD Symbol;Acc:620311]
Akr7a2	chr5	RDG_10min_no_LTP	98.54	105.677	59	58	1	1	1	1	0	0	0	0	aldo-keto reductase family 7, member A2 [Source:RGD Symbol;Acc:620311]
Akr7a2	chr5	RDG_60min_no_LTP	111.63	114.988	91	89	2	3	0	0	1	1	1	2	aldo-keto reductase family 7, member A2 [Source:RGD Symbol;Acc:620311]
Akr7a3	chr5	LDG_10min_LTP	105	108.505	13	12	1	1	0	0	1	1	0	0	aldo-keto reductase family 7 member A3 [Source:RGD Symbol;Acc:628635]
Akr7a3	chr5	LDG_60min_LTP	47.24	51.256	5	5	0	0	0	0	0	0	0	0	aldo-keto reductase family 7 member A3 [Source:RGD Symbol;Acc:628635]
Akr7a3	chr5	RDG_10min_no_LTP	111.535	130.88	4	4	0	0	0	0	0	0	0	0	aldo-keto reductase family 7 member A3 [Source:RGD Symbol;Acc:628635]
Akr7a3	chr5	RDG_60min_no_LTP	48.985	48.985	2	2	0	0	0	0	0	0	0	0	aldo-keto reductase family 7 member A3 [Source:RGD Symbol;Acc:628635]
Akt1	chr6	LDG_10min_LTP	95.14	107.946	184	179	5	6	3	3	2	3	0	0	AKT serine/threonine kinase 1 [Source:RGD Symbol;Acc:2081]
Akt1	chr6	LDG_60min_LTP	84.45	101.01	176	172	4	5	1	1	1	2	2	2	AKT serine/threonine kinase 1 [Source:RGD Symbol;Acc:2081]
Akt1	chr6	RDG_10min_no_LTP	86.28	101.365	136	129	7	7	3	3	4	4	0	0	AKT serine/threonine kinase 1 [Source:RGD Symbol;Acc:2081]
Akt1	chr6	RDG_60min_no_LTP	96.47	107.487	208	207	1	1	1	1	0	0	0	0	AKT serine/threonine kinase 1 [Source:RGD Symbol;Acc:2081]
Akt1s1	chr1	LDG_10min_LTP	113.905	118.502	108	104	4	4	1	1	1	1	2	2	AKT1 substrate 1 [Source:RGD Symbol;Acc:1312049]
Akt1s1	chr1	LDG_60min_LTP	98	116.1	81	77	4	4	3	3	0	0	1	1	AKT1 substrate 1 [Source:RGD Symbol;Acc:1312049]
Akt1s1	chr1	RDG_10min_no_LTP	120.19	121.842	98	94	4	4	3	3	0	0	1	1	AKT1 substrate 1 [Source:RGD Symbol;Acc:1312049]
Akt1s1	chr1	RDG_60min_no_LTP	103.22	113.043	127	123	4	4	1	1	1	1	2	2	AKT1 substrate 1 [Source:RGD Symbol;Acc:1312049]
Akt2	chr1	LDG_10min_LTP	73.87	101.656	79	76	3	3	1	1	2	2	0	0	AKT serine/threonine kinase 2 [Source:RGD Symbol;Acc:2082]
Akt2	chr1	LDG_60min_LTP	89.22	111.581	83	79	4	5	1	2	1	1	2	2	AKT serine/threonine kinase 2 [Source:RGD Symbol;Acc:2082]
Akt2	chr1	RDG_10min_no_LTP	108.36	117.815	61	54	7	7	2	2	3	3	2	2	AKT serine/threonine kinase 2 [Source:RGD Symbol;Acc:2082]
Akt2	chr1	RDG_60min_no_LTP	81.76	103.343	86	85	1	1	0	0	0	0	1	1	AKT serine/threonine kinase 2 [Source:RGD Symbol;Acc:2082]
Akt3	chr13	LDG_10min_LTP	103	115.36	147	144	3	5	2	2	1	3	0	0	AKT serine/threonine kinase 3 [Source:RGD Symbol;Acc:62390]
Akt3	chr13	LDG_60min_LTP	106.39	114.222	173	163	10	15	3	3	3	6	6	6	AKT serine/threonine kinase 3 [Source:RGD Symbol;Acc:62390]
Akt3	chr13	RDG_10min_no_LTP	127.43	131.823	131	124	7	11	3	5	5	5	1	1	AKT serine/threonine kinase 3 [Source:RGD Symbol;Acc:62390]
Akt3	chr13	RDG_60min_no_LTP	122.37	132.958	198	190	8	12	3	4	5	6	2	2	AKT serine/threonine kinase 3 [Source:RGD Symbol;Acc:62390]
Aktip	chr19	LDG_10min_LTP	84.66	101.693	138	136	2	2	1	1	0	0	1	1	AKT interacting protein [Source:RGD Symbol;Acc:1311170]
Aktip	chr19	LDG_60min_LTP	88.78	101.278	126	121	5	5	1	1	4	4	0	0	AKT interacting protein [Source:RGD Symbol;Acc:1311170]
Aktip	chr19	RDG_10min_no_LTP	98.745	113.868	102	95	7	8	2	2	3	3	3	3	AKT interacting protein [Source:RGD Symbol;Acc:1311170]
Aktip	chr19	RDG_60min_no_LTP	95.79	106.116	143	140	3	4	1	1	2	3	0	0	AKT interacting protein [Source:RGD Symbol;Acc:1311170]
Alad	chr5	LDG_10min_LTP	75.18	94.0959	49	48	1	3	0	0	1	3	0	0	aminolevulinate dehydratase [Source:RGD Symbol;Acc:2083]
Alad	chr5	LDG_60min_LTP	87.83	115.71	35	34	1	1	1	1	0	0	0	0	aminolevulinate dehydratase [Source:RGD Symbol;Acc:2083]
Alad	chr5	RDG_10min_no_LTP	91.15	96.3062	39	39	0	0	0	0	0	0	0	0	aminolevulinate dehydratase [Source:RGD Symbol;Acc:2083]
Alad	chr5	RDG_60min_no_LTP	98.72	108.939	60	55	5	7	1	1	3	3	2	3	aminolevulinate dehydratase [Source:RGD Symbol;Acc:2083]
Alas1	chr8	LDG_10min_LTP	94.91	109.431	73	71	2	2	1	1	0	0	1	1	5'-aminolevulinate synthase 1 [Source:RGD Symbol;Acc:68392]
Alas1	chr8	LDG_60min_LTP	91.54	101.321	76	73	3	3	1	1	0	0	2	2	5'-aminolevulinate synthase 1 [Source:RGD Symbol;Acc:68392]
Alas1	chr8	RDG_10min_no_LTP	120.78	116.268	67	64	3	3	2	2	1	1	0	0	5'-aminolevulinate synthase 1 [Source:RGD Symbol;Acc:68392]
Alas1	chr8	RDG_60min_no_LTP	103.59	114.316	97	95	2	2	1	1	0	0	1	1	5'-aminolevulinate synthase 1 [Source:RGD Symbol;Acc:68392]
Alas2	chrX	LDG_10min_LTP	60.195	64.626	10	10	0	0	0	0	0	0	0	0	5'-aminolevulinate synthase 2 [Source:RGD Symbol;Acc:2084]
Alas2	chrX	LDG_60min_LTP	35.54	39.3064	11	11	0	0	0	0	0	0	0	0	5'-aminolevulinate synthase 2 [Source:RGD Symbol;Acc:2084]
Alas2	chrX	RDG_10min_no_LTP	50.25	54.9886	7	5	2	2	1	1	0	0	1	1	5'-aminolevulinate synthase 2 [Source:RGD Symbol;Acc:2084]
Alas2	chrX	RDG_60min_no_LTP	44.31	45.4854	13	11	2	2	0	0	0	0	2	2	5'-aminolevulinate synthase 2 [Source:RGD Symbol;Acc:2084]
Alb	chr14	LDG_10min_LTP	161.015	149.825	8	7	1	1	0	0	1	1	0	0	albumin [Source:RGD Symbol;Acc:2085]
Alb	chr14	LDG_60min_LTP	140.37	129.898	4	4	0	0	0	0	0	0	0	0	albumin [Source:RGD Symbol;Acc:2085]
Alb	chr14	RDG_10min_no_LTP	56.19	59.6	5	5	0	0	0	0	0	0	0	0	albumin [Source:RGD Symbol;Acc:2085]
Alb	chr14	RDG_60min_no_LTP	78.22	88.426	5	3	2	2	1	1	1	1	0	0	albumin [Source:RGD Symbol;Acc:2085]
Alcam	chr11	LDG_10min_LTP	110.54	127.001	101	100	1	1	0	0	1	1	0	0	activated leukocyte cell adhesion molecule [Source:RGD Symbol;Acc:619972]
Alcam	chr11	LDG_60min_LTP	101.91	121.692	84	82	2	2	2	2	0	0	0	0	activated leukocyte cell adhesion molecule [Source:RGD Symbol;Acc:619972]
Alcam	chr11	RDG_10min_no_LTP	128.39	139.069	70	70	0	0	0	0	0	0	0	0	activated leukocyte cell adhesion molecule [Source:RGD Symbol;Acc:619972]
Alcam	chr11	RDG_60min_no_LTP	113.645	130.331	132	128	4	5	2	2	2	3	0	0	activated leukocyte cell adhesion molecule [Source:RGD Symbol;Acc:619972]
Aldh16a1	chr1	LDG_10min_LTP	74.355	100.959	18	18	0	0	0	0	0	0	0	0	aldehyde dehydrogenase 16 family, member A1 [Source:RGD Symbol;Acc:1566295]
Aldh16a1	chr1	LDG_60min_LTP	74.335	99.975	10	10	0	0	0	0	0	0	0	0	aldehyde dehydrogenase 16 family, member A1 [Source:RGD Symbol;Acc:1566295]
Aldh16a1	chr1	RDG_10min_no_LTP	112.25	126.723	11	11	0	0	0	0	0	0	0	0	aldehyde dehydrogenase 16 family, member A1 [Source:RGD Symbol;Acc:1566295]
Aldh16a1	chr1	RDG_60min_no_LTP	108.79	100.656	11	11	0	0	0	0	0	0	0	0	aldehyde dehydrogenase 16 family, member A1 [Source:RGD Symbol;Acc:1566295]
Aldh18a1	chr1	LDG_10min_LTP	120.04	122.289	36	34	2	3	1	1	1	2	0	0	aldehyde dehydrogenase 18 family, member A1 [Source:RGD Symbol;Acc:1311431]
Aldh18a1	chr1	LDG_60min_LTP	100.21	113.45	27	25	2	2	1	1	0	0	1	1	aldehyde dehydrogenase 18 family, member A1 [Source:RGD Symbol;Acc:1311431]
Aldh18a1	chr1	RDG_10min_no_LTP	117.29	118.428	31	30	1	1	0	0	1	1	0	0	aldehyde dehydrogenase 18 family, member A1 [Source:RGD Symbol;Acc:1311431]
Aldh18a1	chr1	RDG_60min_no_LTP	111.45	114.843	33	33	0	0	0	0	0	0	0	0	aldehyde dehydrogenase 18 family, member A1 [Source:RGD Symbol;Acc:1311431]
Aldh1a1	chr1	LDG_10min_LTP	123.635	122.076	46	46	0	0	0	0	0	0	0	0	aldehyde dehydrogenase 1 family, member A1 [Source:RGD Symbol;Acc:2087]
Aldh1a1	chr1	LDG_60min_LTP	101.52	100.79	38	35	3	3	1	1	0	0	2	2	aldehyde dehydrogenase 1 family, member A1 [Source:RGD Symbol;Acc:2087]
Aldh1a1	chr1	RDG_10min_no_LTP	105.115	104.714	42	40	2	4	1	1	1	3	0	0	aldehyde dehydrogenase 1 family, member A1 [Source:RGD Symbol;Acc:2087]
Aldh1a1	chr1	RDG_60min_no_LTP	111.335	116.809	48	48	0	0	0	0	0	0	0	0	aldehyde dehydrogenase 1 family, member A1 [Source:RGD Symbol;Acc:2087]
Aldh1a2	chr8	LDG_10min_LTP	41.48	41.48	1	1	0	0	0	0	0	0	0	0	aldehyde dehydrogenase 1 family, member A2 [Source:RGD Symbol;Acc:620250]
Aldh1a2	chr8	LDG_60min_LTP	98.53	104.887	3	3	0	0	0	0	0	0	0	0	aldehyde dehydrogenase 1 family, member A2 [Source:RGD Symbol;Acc:620250]
Aldh1a2	chr8	RDG_10min_no_LTP	130.665	130.665	2	2	0	0	0	0	0	0	0	0	aldehyde dehydrogenase 1 family, member A2 [Source:RGD Symbol;Acc:620250]
Aldh1a2	chr8	RDG_60min_no_LTP	105.39	97.1533	6	6	0	0	0	0	0	0	0	0	aldehyde dehydrogenase 1 family, member A2 [Source:RGD Symbol;Acc:620250]
Aldh1b1	chr5	LDG_10min_LTP	123.01	130.643	20	19	1	2	0	0	0	0	1	2	aldehyde dehydrogenase 1 family, member B1 [Source:RGD Symbol;Acc:1306737]
Aldh1b1	chr5	LDG_60min_LTP	95.29	95.502	10	10	0	0	0	0	0	0	0	0	aldehyde dehydrogenase 1 family, member B1 [Source:RGD Symbol;Acc:1306737]
Aldh1b1	chr5	RDG_10min_no_LTP	101.16	102.55	24	22	2	3	1	1	0	0	2	2	aldehyde dehydrogenase 1 family, member B1 [Source:RGD Symbol;Acc:1306737]
Aldh1b1	chr5	RDG_60min_no_LTP	110.34	116.373	36	36	0	0	0	0	0	0	0	0	aldehyde dehydrogenase 1 family, member B1 [Source:RGD Symbol;Acc:1306737]
Aldh1l1	chr4	LDG_10min_LTP	95.24	98.8251	37	36	1	1	0	0	0	0	1	1	aldehyde dehydrogenase 1 family, member L1 [Source:RGD Symbol;Acc:621294]
Aldh1l1	chr4	LDG_60min_LTP	94.76	107.026	34	33	1	1	0	0	1	1	0	0	aldehyde dehydrogenase 1 family, member L1 [Source:RGD Symbol;Acc:621294]
Aldh1l1	chr4	RDG_10min_no_LTP	82.095	102.551	30	29	1	1	0	0	1	1	0	0	aldehyde dehydrogenase 1 family, member L1 [Source:RGD Symbol;Acc:621294]
Aldh1l1	chr4	RDG_60min_no_LTP	94.03	111.084	47	45	2	2	2	2	0	0	0	0	aldehyde dehydrogenase 1 family, member L1 [Source:RGD Symbol;Acc:621294]
Aldh1l2	chr7	LDG_10min_LTP	74.52	74.52	1	1	0	0	0	0	0	0	0	0	aldehyde dehydrogenase 1 family, member L2 [Source:RGD Symbol;Acc:1309458]
Aldh2	chr12	LDG_10min_LTP	97.555	101.765	76	72	4	4	3	3	0	0	1	1	aldehyde dehydrogenase 2 family member [Source:RGD Symbol;Acc:69219]
Aldh2	chr12	LDG_60min_LTP	91.86	99.2864	64	64	0	0	0	0	0	0	0	0	aldehyde dehydrogenase 2 family member [Source:RGD Symbol;Acc:69219]
Aldh2	chr12	RDG_10min_no_LTP	93.21	100.513	70	67	3	3	1	1	0	0	2	2	aldehyde dehydrogenase 2 family member [Source:RGD Symbol;Acc:69219]
Aldh2	chr12	RDG_60min_no_LTP	94.93	102.658	99	97	2	3	1	1	0	0	1	2	aldehyde dehydrogenase 2 family member [Source:RGD Symbol;Acc:69219]
Aldh3a1	chr10	LDG_10min_LTP	98.73	98.73	1	1	0	0	0	0	0	0	0	0	aldehyde dehydrogenase 3 family, member A1 [Source:RGD Symbol;Acc:2088]
Aldh3a1	chr10	RDG_10min_no_LTP	97.85	97.85	1	1	0	0	0	0	0	0	0	0	aldehyde dehydrogenase 3 family, member A1 [Source:RGD Symbol;Acc:2088]
Aldh3a2	chr10	LDG_10min_LTP	95.68	101.604	81	75	6	6	5	5	0	0	1	1	aldehyde dehydrogenase 3 family, member A2 [Source:RGD Symbol;Acc:61866]
Aldh3a2	chr10	LDG_60min_LTP	104.64	110.882	49	47	2	3	0	0	1	1	2	2	aldehyde dehydrogenase 3 family, member A2 [Source:RGD Symbol;Acc:61866]
Aldh3a2	chr10	RDG_10min_no_LTP	108.68	118.405	61	60	1	1	0	0	0	0	1	1	aldehyde dehydrogenase 3 family, member A2 [Source:RGD Symbol;Acc:61866]
Aldh3a2	chr10	RDG_60min_no_LTP	83.43	107.979	73	72	1	1	0	0	0	0	1	1	aldehyde dehydrogenase 3 family, member A2 [Source:RGD Symbol;Acc:61866]
Aldh3b1	chr1	LDG_10min_LTP	80.49	86.0924	98	96	2	2	2	2	0	0	0	0	aldehyde dehydrogenase 3 family, member B1 [Source:RGD Symbol;Acc:1359546]
Aldh3b1	chr1	LDG_60min_LTP	68.7	73.1647	93	90	3	3	1	1	1	1	1	1	aldehyde dehydrogenase 3 family, member B1 [Source:RGD Symbol;Acc:1359546]
Aldh3b1	chr1	RDG_10min_no_LTP	75.13	84.3023	69	67	2	2	1	1	0	0	1	1	aldehyde dehydrogenase 3 family, member B1 [Source:RGD Symbol;Acc:1359546]
Aldh3b1	chr1	RDG_60min_no_LTP	72.475	84.724	136	131	5	5	3	3	0	0	2	2	aldehyde dehydrogenase 3 family, member B1 [Source:RGD Symbol;Acc:1359546]
Aldh3b2	chr1	LDG_10min_LTP	110.5	121.485	26	25	1	1	1	1	0	0	0	0	aldehyde dehydrogenase 3 family, member B2 [Source:RGD Symbol;Acc:1584166]
Aldh3b2	chr1	LDG_60min_LTP	99.705	115.18	34	28	6	6	0	0	4	4	2	2	aldehyde dehydrogenase 3 family, member B2 [Source:RGD Symbol;Acc:1584166]
Aldh3b2	chr1	RDG_10min_no_LTP	132.315	124.094	28	26	2	4	1	1	2	3	0	0	aldehyde dehydrogenase 3 family, member B2 [Source:RGD Symbol;Acc:1584166]
Aldh3b2	chr1	RDG_60min_no_LTP	124.88	138.504	34	30	4	4	2	2	1	1	1	1	aldehyde dehydrogenase 3 family, member B2 [Source:RGD Symbol;Acc:1584166]
Aldh4a1	chr5	LDG_10min_LTP	106.09	122.374	29	28	1	1	1	1	0	0	0	0
Aldh4a1	chr5	LDG_60min_LTP	98.62	124.71	14	13	1	1	1	1	0	0	0	0
Aldh4a1	chr5	RDG_10min_no_LTP	93.57	104.157	29	27	2	2	0	0	1	1	1	1
Aldh4a1	chr5	RDG_60min_no_LTP	67.595	101.471	26	24	2	2	0	0	1	1	1	1
Aldh5a1	chr17	LDG_10min_LTP	119.28	126.009	85	85	0	0	0	0	0	0	0	0	aldehyde dehydrogenase 5 family, member A1 [Source:RGD Symbol;Acc:621422]
Aldh5a1	chr17	LDG_60min_LTP	120.88	132.003	98	98	0	0	0	0	0	0	0	0	aldehyde dehydrogenase 5 family, member A1 [Source:RGD Symbol;Acc:621422]
Aldh5a1	chr17	RDG_10min_no_LTP	117.02	132.738	78	78	0	0	0	0	0	0	0	0	aldehyde dehydrogenase 5 family, member A1 [Source:RGD Symbol;Acc:621422]
Aldh5a1	chr17	RDG_60min_no_LTP	133.54	141.161	123	123	0	0	0	0	0	0	0	0	aldehyde dehydrogenase 5 family, member A1 [Source:RGD Symbol;Acc:621422]
Aldh6a1	chr6	LDG_10min_LTP	114.18	133.155	75	69	6	7	2	2	0	0	4	5	aldehyde dehydrogenase 6 family, member A1 [Source:RGD Symbol;Acc:621556]
Aldh6a1	chr6	LDG_60min_LTP	118.92	129.308	59	59	0	0	0	0	0	0	0	0	aldehyde dehydrogenase 6 family, member A1 [Source:RGD Symbol;Acc:621556]
Aldh6a1	chr6	RDG_10min_no_LTP	102	127.525	65	62	3	4	3	3	0	0	1	1	aldehyde dehydrogenase 6 family, member A1 [Source:RGD Symbol;Acc:621556]
Aldh6a1	chr6	RDG_60min_no_LTP	113.04	126.555	99	90	9	10	1	1	0	0	8	9	aldehyde dehydrogenase 6 family, member A1 [Source:RGD Symbol;Acc:621556]
Aldh7a1	chr18	LDG_10min_LTP	97.75	102.658	85	84	1	2	1	1	0	0	1	1	aldehyde dehydrogenase 7 family, member A1 [Source:RGD Symbol;Acc:1308614]
Aldh7a1	chr18	LDG_60min_LTP	100.08	102.265	58	58	0	0	0	0	0	0	0	0	aldehyde dehydrogenase 7 family, member A1 [Source:RGD Symbol;Acc:1308614]
Aldh7a1	chr18	RDG_10min_no_LTP	90.37	99.9704	45	45	0	0	0	0	0	0	0	0	aldehyde dehydrogenase 7 family, member A1 [Source:RGD Symbol;Acc:1308614]
Aldh7a1	chr18	RDG_60min_no_LTP	107.025	116.007	84	83	1	1	0	0	0	0	1	1	aldehyde dehydrogenase 7 family, member A1 [Source:RGD Symbol;Acc:1308614]
Aldh8a1	chr1	LDG_60min_LTP	270.14	270.14	1	1	0	0	0	0	0	0	0	0	aldehyde dehydrogenase 8 family, member A1 [Source:RGD Symbol;Acc:1590218]
Aldh9a1	chr13	LDG_10min_LTP	89.905	96.1897	86	84	2	2	1	1	1	1	0	0	aldehyde dehydrogenase 9 family, member A1 [Source:RGD Symbol;Acc:68409]
Aldh9a1	chr13	LDG_60min_LTP	89.03	96.8173	64	62	2	2	0	0	0	0	2	2	aldehyde dehydrogenase 9 family, member A1 [Source:RGD Symbol;Acc:68409]
Aldh9a1	chr13	RDG_10min_no_LTP	88.24	110.611	54	54	0	0	0	0	0	0	0	0	aldehyde dehydrogenase 9 family, member A1 [Source:RGD Symbol;Acc:68409]
Aldh9a1	chr13	RDG_60min_no_LTP	84.89	103.137	78	72	6	7	3	3	2	2	2	2	aldehyde dehydrogenase 9 family, member A1 [Source:RGD Symbol;Acc:68409]
Aldoa	chr1	LDG_10min_LTP	121.09	126.656	4236	3988	248	271	58	60	160	168	37	43	aldolase, fructose-bisphosphate A [Source:RGD Symbol;Acc:2089]
Aldoa	chr1	LDG_60min_LTP	120.58	125.709	3507	3293	214	236	46	49	142	157	29	30	aldolase, fructose-bisphosphate A [Source:RGD Symbol;Acc:2089]
Aldoa	chr1	RDG_10min_no_LTP	122.785	128.454	3282	3078	204	233	47	50	134	154	26	29	aldolase, fructose-bisphosphate A [Source:RGD Symbol;Acc:2089]
Aldoa	chr1	RDG_60min_no_LTP	122.685	127.873	4452	4157	295	313	73	75	186	194	42	44	aldolase, fructose-bisphosphate A [Source:RGD Symbol;Acc:2089]
Aldoart2	chr6	RDG_60min_no_LTP	32.21	32.21	1	1	0	0	0	0	0	0	0	0	aldolase 1 A retrogene 2 [Source:RGD Symbol;Acc:1359133]
Aldob	chr5	LDG_60min_LTP	91.25	91.25	1	1	0	0	0	0	0	0	0	0	aldolase, fructose-bisphosphate B [Source:RGD Symbol;Acc:2090]
Aldob	chr5	RDG_10min_no_LTP	150.52	150.52	1	1	0	0	0	0	0	0	0	0	aldolase, fructose-bisphosphate B [Source:RGD Symbol;Acc:2090]
Aldob	chr5	RDG_60min_no_LTP	136.45	136.45	1	1	0	0	0	0	0	0	0	0	aldolase, fructose-bisphosphate B [Source:RGD Symbol;Acc:2090]
Aldoc	chr10	LDG_10min_LTP	94	99.7283	1587	1541	46	51	21	22	17	18	11	11	aldolase, fructose-bisphosphate C [Source:RGD Symbol;Acc:2091]
Aldoc	chr10	LDG_60min_LTP	93.305	98.4776	1334	1300	34	36	18	18	13	14	4	4	aldolase, fructose-bisphosphate C [Source:RGD Symbol;Acc:2091]
Aldoc	chr10	RDG_10min_no_LTP	93.08	100.693	1246	1208	38	40	18	18	7	8	14	14	aldolase, fructose-bisphosphate C [Source:RGD Symbol;Acc:2091]
Aldoc	chr10	RDG_60min_no_LTP	92.74	100.142	1735	1689	46	51	21	21	15	16	13	14	aldolase, fructose-bisphosphate C [Source:RGD Symbol;Acc:2091]
Alg1	chr10	LDG_10min_LTP	101.56	113.917	25	24	1	1	1	1	0	0	0	0	ALG1, chitobiosyldiphosphodolichol beta-mannosyltransferase [Source:RGD Symbol;Acc:1310700]
Alg1	chr10	LDG_60min_LTP	110.865	136.782	12	11	1	1	0	0	1	1	0	0	ALG1, chitobiosyldiphosphodolichol beta-mannosyltransferase [Source:RGD Symbol;Acc:1310700]
Alg1	chr10	RDG_10min_no_LTP	162.16	145.591	9	9	0	0	0	0	0	0	0	0	ALG1, chitobiosyldiphosphodolichol beta-mannosyltransferase [Source:RGD Symbol;Acc:1310700]
Alg1	chr10	RDG_60min_no_LTP	159.88	155.951	21	21	0	0	0	0	0	0	0	0	ALG1, chitobiosyldiphosphodolichol beta-mannosyltransferase [Source:RGD Symbol;Acc:1310700]
Alg10	chr7	LDG_10min_LTP	220.32	220.32	1	1	0	0	0	0	0	0	0	0	ALG10, alpha-1,2-glucosyltransferase [Source:RGD Symbol;Acc:708500]
Alg10	chr7	RDG_10min_no_LTP	126.135	150.643	4	4	0	0	0	0	0	0	0	0	ALG10, alpha-1,2-glucosyltransferase [Source:RGD Symbol;Acc:708500]
Alg10	chr7	RDG_60min_no_LTP	61.3	53.84	3	3	0	0	0	0	0	0	0	0	ALG10, alpha-1,2-glucosyltransferase [Source:RGD Symbol;Acc:708500]
Alg11	chr16	LDG_10min_LTP	101.5	126.891	61	57	4	6	0	0	1	1	3	5	ALG11, alpha-1,2-mannosyltransferase [Source:RGD Symbol;Acc:1564725]
Alg11	chr16	LDG_60min_LTP	141	133.134	59	56	3	7	0	0	2	2	3	5	ALG11, alpha-1,2-mannosyltransferase [Source:RGD Symbol;Acc:1564725]
Alg11	chr16	RDG_10min_no_LTP	109.53	119.753	59	59	0	0	0	0	0	0	0	0	ALG11, alpha-1,2-mannosyltransferase [Source:RGD Symbol;Acc:1564725]
Alg11	chr16	RDG_60min_no_LTP	120.495	134.366	76	72	4	6	1	1	1	3	2	2	ALG11, alpha-1,2-mannosyltransferase [Source:RGD Symbol;Acc:1564725]
Alg12	chr7	LDG_10min_LTP	92	103.876	9	7	2	2	0	0	0	0	2	2	ALG12, alpha-1,6-mannosyltransferase [Source:RGD Symbol;Acc:1304826]
Alg12	chr7	LDG_60min_LTP	88.065	109.48	8	7	1	1	1	1	0	0	0	0	ALG12, alpha-1,6-mannosyltransferase [Source:RGD Symbol;Acc:1304826]
Alg12	chr7	RDG_10min_no_LTP	96.76	116.911	13	13	0	0	0	0	0	0	0	0	ALG12, alpha-1,6-mannosyltransferase [Source:RGD Symbol;Acc:1304826]
Alg12	chr7	RDG_60min_no_LTP	161.375	155.71	12	12	0	0	0	0	0	0	0	0	ALG12, alpha-1,6-mannosyltransferase [Source:RGD Symbol;Acc:1304826]
Alg13	chrX	LDG_10min_LTP	137.18	131.278	28	28	0	0	0	0	0	0	0	0	ALG13, UDP-N-acetylglucosaminyltransferase subunit [Source:RGD Symbol;Acc:1359416]
Alg13	chrX	LDG_60min_LTP	96.17	117.438	22	20	2	2	1	1	0	0	1	1	ALG13, UDP-N-acetylglucosaminyltransferase subunit [Source:RGD Symbol;Acc:1359416]
Alg13	chrX	RDG_10min_no_LTP	98.355	121.017	20	19	1	1	0	0	0	0	1	1	ALG13, UDP-N-acetylglucosaminyltransferase subunit [Source:RGD Symbol;Acc:1359416]
Alg13	chrX	RDG_60min_no_LTP	134.52	135.812	25	25	0	0	0	0	0	0	0	0	ALG13, UDP-N-acetylglucosaminyltransferase subunit [Source:RGD Symbol;Acc:1359416]
Alg14	chr2	LDG_10min_LTP	90	106.712	26	26	0	0	0	0	0	0	0	0	ALG14, UDP-N-acetylglucosaminyltransferase subunit [Source:RGD Symbol;Acc:1312003]
Alg14	chr2	LDG_60min_LTP	84.25	97.1133	27	27	0	0	0	0	0	0	0	0	ALG14, UDP-N-acetylglucosaminyltransferase subunit [Source:RGD Symbol;Acc:1312003]
Alg14	chr2	RDG_10min_no_LTP	123.46	120.205	17	16	1	1	1	1	0	0	0	0	ALG14, UDP-N-acetylglucosaminyltransferase subunit [Source:RGD Symbol;Acc:1312003]
Alg14	chr2	RDG_60min_no_LTP	112.62	139.405	30	29	1	1	0	0	0	0	1	1	ALG14, UDP-N-acetylglucosaminyltransferase subunit [Source:RGD Symbol;Acc:1312003]
Alg2	chr5	LDG_10min_LTP	114.57	112.323	271	252	19	22	6	6	5	7	9	9	ALG2, alpha-1,3/1,6-mannosyltransferase [Source:RGD Symbol;Acc:1309940]
Alg2	chr5	LDG_60min_LTP	92.83	104.067	181	176	5	5	2	2	0	0	3	3	ALG2, alpha-1,3/1,6-mannosyltransferase [Source:RGD Symbol;Acc:1309940]
Alg2	chr5	RDG_10min_no_LTP	84.81	100.658	212	194	18	20	3	3	5	7	10	10	ALG2, alpha-1,3/1,6-mannosyltransferase [Source:RGD Symbol;Acc:1309940]
Alg2	chr5	RDG_60min_no_LTP	101.78	110.014	293	279	14	14	4	4	4	4	6	6	ALG2, alpha-1,3/1,6-mannosyltransferase [Source:RGD Symbol;Acc:1309940]
Alg3	chr11	LDG_10min_LTP	104.21	97.8112	41	41	0	0	0	0	0	0	0	0	ALG3, alpha-1,3- mannosyltransferase [Source:RGD Symbol;Acc:1306004]
Alg3	chr11	LDG_60min_LTP	98.665	107.093	38	37	1	1	0	0	1	1	0	0	ALG3, alpha-1,3- mannosyltransferase [Source:RGD Symbol;Acc:1306004]
Alg3	chr11	RDG_10min_no_LTP	101.57	114.822	33	31	2	2	1	1	0	0	1	1	ALG3, alpha-1,3- mannosyltransferase [Source:RGD Symbol;Acc:1306004]
Alg3	chr11	RDG_60min_no_LTP	120.46	116.195	42	42	0	0	0	0	0	0	0	0	ALG3, alpha-1,3- mannosyltransferase [Source:RGD Symbol;Acc:1306004]
Alg5	chr2	LDG_10min_LTP	114.165	137.336	38	37	1	1	1	1	0	0	0	0	ALG5, dolichyl-phosphate beta-glucosyltransferase [Source:RGD Symbol;Acc:1308900]
Alg5	chr2	LDG_60min_LTP	60.65	80.8818	17	17	0	0	0	0	0	0	0	0	ALG5, dolichyl-phosphate beta-glucosyltransferase [Source:RGD Symbol;Acc:1308900]
Alg5	chr2	RDG_10min_no_LTP	82.81	101.053	29	28	1	1	0	0	0	0	1	1	ALG5, dolichyl-phosphate beta-glucosyltransferase [Source:RGD Symbol;Acc:1308900]
Alg5	chr2	RDG_60min_no_LTP	136.46	143.929	43	43	0	0	0	0	0	0	0	0	ALG5, dolichyl-phosphate beta-glucosyltransferase [Source:RGD Symbol;Acc:1308900]
Alg6	chr5	LDG_10min_LTP	175.86	169.824	9	9	0	0	0	0	0	0	0	0	ALG6, alpha-1,3-glucosyltransferase [Source:RGD Symbol;Acc:1308815]
Alg6	chr5	LDG_60min_LTP	91.37	133.82	5	5	0	0	0	0	0	0	0	0	ALG6, alpha-1,3-glucosyltransferase [Source:RGD Symbol;Acc:1308815]
Alg6	chr5	RDG_10min_no_LTP	227	183.49	5	5	0	0	0	0	0	0	0	0	ALG6, alpha-1,3-glucosyltransferase [Source:RGD Symbol;Acc:1308815]
Alg6	chr5	RDG_60min_no_LTP	236.11	192.37	9	9	0	0	0	0	0	0	0	0	ALG6, alpha-1,3-glucosyltransferase [Source:RGD Symbol;Acc:1308815]
Alg8	chr1	LDG_10min_LTP	182.375	163.193	6	6	0	0	0	0	0	0	0	0	ALG8, alpha-1,3-glucosyltransferase [Source:RGD Symbol;Acc:1305468]
Alg8	chr1	LDG_60min_LTP	225.7	208.307	3	1	2	2	2	2	0	0	0	0	ALG8, alpha-1,3-glucosyltransferase [Source:RGD Symbol;Acc:1305468]
Alg8	chr1	RDG_10min_no_LTP	130.79	177.258	5	5	0	0	0	0	0	0	0	0	ALG8, alpha-1,3-glucosyltransferase [Source:RGD Symbol;Acc:1305468]
Alg8	chr1	RDG_60min_no_LTP	203.265	224.52	4	4	0	0	0	0	0	0	0	0	ALG8, alpha-1,3-glucosyltransferase [Source:RGD Symbol;Acc:1305468]
Alg9	chr8	LDG_10min_LTP	114.305	143.426	30	29	1	1	0	0	0	0	1	1	ALG9, alpha-1,2-mannosyltransferase [Source:RGD Symbol;Acc:1311272]
Alg9	chr8	LDG_60min_LTP	96.43	122.915	27	25	2	3	1	1	2	2	0	0	ALG9, alpha-1,2-mannosyltransferase [Source:RGD Symbol;Acc:1311272]
Alg9	chr8	RDG_10min_no_LTP	96.065	100.417	16	14	2	2	0	0	2	2	0	0	ALG9, alpha-1,2-mannosyltransferase [Source:RGD Symbol;Acc:1311272]
Alg9	chr8	RDG_60min_no_LTP	132.09	148.354	45	44	1	1	1	1	0	0	0	0	ALG9, alpha-1,2-mannosyltransferase [Source:RGD Symbol;Acc:1311272]
Alk	chr6	LDG_10min_LTP	172.265	155.127	4	4	0	0	0	0	0	0	0	0	ALK receptor tyrosine kinase [Source:RGD Symbol;Acc:628622]
Alk	chr6	LDG_60min_LTP	123.86	127.677	7	7	0	0	0	0	0	0	0	0	ALK receptor tyrosine kinase [Source:RGD Symbol;Acc:628622]
Alk	chr6	RDG_10min_no_LTP	184.37	233.408	5	5	0	0	0	0	0	0	0	0	ALK receptor tyrosine kinase [Source:RGD Symbol;Acc:628622]
Alk	chr6	RDG_60min_no_LTP	94.37	138.074	7	7	0	0	0	0	0	0	0	0	ALK receptor tyrosine kinase [Source:RGD Symbol;Acc:628622]
Alkal2	chr6	LDG_10min_LTP	85.14	114.45	4	4	0	0	0	0	0	0	0	0	ALK and LTK ligand 2 [Source:RGD Symbol;Acc:1587117]
Alkal2	chr6	LDG_60min_LTP	109.19	107.007	4	4	0	0	0	0	0	0	0	0	ALK and LTK ligand 2 [Source:RGD Symbol;Acc:1587117]
Alkal2	chr6	RDG_10min_no_LTP	94.61	94.61	2	2	0	0	0	0	0	0	0	0	ALK and LTK ligand 2 [Source:RGD Symbol;Acc:1587117]
Alkal2	chr6	RDG_60min_no_LTP	70.765	86.6162	8	8	0	0	0	0	0	0	0	0	ALK and LTK ligand 2 [Source:RGD Symbol;Acc:1587117]
Alkbh1	chr6	LDG_10min_LTP	79.05	100.081	12	12	0	0	0	0	0	0	0	0	alkB homolog 1, histone H2A dioxygenase [Source:RGD Symbol;Acc:1308327]
Alkbh1	chr6	LDG_60min_LTP	240.615	215.9	12	12	0	0	0	0	0	0	0	0	alkB homolog 1, histone H2A dioxygenase [Source:RGD Symbol;Acc:1308327]
Alkbh1	chr6	RDG_10min_no_LTP	237.73	196.211	9	9	0	0	0	0	0	0	0	0	alkB homolog 1, histone H2A dioxygenase [Source:RGD Symbol;Acc:1308327]
Alkbh1	chr6	RDG_60min_no_LTP	227.54	187.538	11	11	0	0	0	0	0	0	0	0	alkB homolog 1, histone H2A dioxygenase [Source:RGD Symbol;Acc:1308327]
Alkbh2	chr12	LDG_10min_LTP	120.435	107.152	14	13	1	1	0	0	0	0	1	1	alkB homolog 2, alpha-ketoglutarate-dependent dioxygenase [Source:RGD Symbol;Acc:1306377]
Alkbh2	chr12	LDG_60min_LTP	50.065	76.0543	14	13	1	1	0	0	1	1	0	0	alkB homolog 2, alpha-ketoglutarate-dependent dioxygenase [Source:RGD Symbol;Acc:1306377]
Alkbh2	chr12	RDG_10min_no_LTP	106.86	101.846	19	19	0	0	0	0	0	0	0	0	alkB homolog 2, alpha-ketoglutarate-dependent dioxygenase [Source:RGD Symbol;Acc:1306377]
Alkbh2	chr12	RDG_60min_no_LTP	116.705	109.025	24	24	0	0	0	0	0	0	0	0	alkB homolog 2, alpha-ketoglutarate-dependent dioxygenase [Source:RGD Symbol;Acc:1306377]
Alkbh3	chr3	LDG_10min_LTP	129.83	139.283	38	37	1	1	1	1	0	0	0	0	alkB homolog 3, alpha-ketoglutarate-dependent dioxygenase [Source:RGD Symbol;Acc:1359731]
Alkbh3	chr3	LDG_60min_LTP	117.2	114.381	49	46	3	4	2	3	0	0	1	1	alkB homolog 3, alpha-ketoglutarate-dependent dioxygenase [Source:RGD Symbol;Acc:1359731]
Alkbh3	chr3	RDG_10min_no_LTP	109.3	116.274	37	35	2	3	1	1	1	1	1	1	alkB homolog 3, alpha-ketoglutarate-dependent dioxygenase [Source:RGD Symbol;Acc:1359731]
Alkbh3	chr3	RDG_60min_no_LTP	113.92	129.234	41	39	2	2	1	1	1	1	0	0	alkB homolog 3, alpha-ketoglutarate-dependent dioxygenase [Source:RGD Symbol;Acc:1359731]
Alkbh4	chr12	LDG_10min_LTP	76.46	95.3	11	11	0	0	0	0	0	0	0	0	alkB homolog 4, lysine demethylase [Source:RGD Symbol;Acc:1308608]
Alkbh4	chr12	LDG_60min_LTP	56.91	51.975	4	4	0	0	0	0	0	0	0	0	alkB homolog 4, lysine demethylase [Source:RGD Symbol;Acc:1308608]
Alkbh4	chr12	RDG_10min_no_LTP	92.73	95.548	10	10	0	0	0	0	0	0	0	0	alkB homolog 4, lysine demethylase [Source:RGD Symbol;Acc:1308608]
Alkbh4	chr12	RDG_60min_no_LTP	101.905	105.397	20	20	0	0	0	0	0	0	0	0	alkB homolog 4, lysine demethylase [Source:RGD Symbol;Acc:1308608]
Alkbh5	chr10	LDG_10min_LTP	95.34	101.217	27	26	1	1	0	0	1	1	0	0	alkB homolog 5, RNA demethylase [Source:RGD Symbol;Acc:1309496]
Alkbh5	chr10	LDG_60min_LTP	132.17	133.328	25	24	1	1	1	1	0	0	0	0	alkB homolog 5, RNA demethylase [Source:RGD Symbol;Acc:1309496]
Alkbh5	chr10	RDG_10min_no_LTP	115.96	127.092	13	12	1	1	0	0	1	1	0	0	alkB homolog 5, RNA demethylase [Source:RGD Symbol;Acc:1309496]
Alkbh5	chr10	RDG_60min_no_LTP	89.57	108.693	15	13	2	4	1	2	0	0	2	2	alkB homolog 5, RNA demethylase [Source:RGD Symbol;Acc:1309496]
Alkbh6	chr1	LDG_10min_LTP	91.055	99.9617	54	53	1	1	0	0	0	0	1	1	alkB homolog 6 [Source:RGD Symbol;Acc:1566318]
Alkbh6	chr1	LDG_60min_LTP	97.165	115.889	44	42	2	2	1	1	0	0	1	1	alkB homolog 6 [Source:RGD Symbol;Acc:1566318]
Alkbh6	chr1	RDG_10min_no_LTP	70.175	80.63	30	30	0	0	0	0	0	0	0	0	alkB homolog 6 [Source:RGD Symbol;Acc:1566318]
Alkbh6	chr1	RDG_60min_no_LTP	110.26	118.938	65	63	2	2	0	0	1	1	1	1	alkB homolog 6 [Source:RGD Symbol;Acc:1566318]
Alkbh7	chr9	LDG_10min_LTP	100.84	107.429	101	97	4	6	4	5	0	0	1	1	alkB homolog 7 [Source:RGD Symbol;Acc:1598126]
Alkbh7	chr9	LDG_60min_LTP	81.37	90.9221	94	89	5	5	4	4	1	1	0	0	alkB homolog 7 [Source:RGD Symbol;Acc:1598126]
Alkbh7	chr9	RDG_10min_no_LTP	103.81	102.84	81	76	5	5	5	5	0	0	0	0	alkB homolog 7 [Source:RGD Symbol;Acc:1598126]
Alkbh7	chr9	RDG_60min_no_LTP	101.97	110.439	113	108	5	6	5	6	0	0	0	0	alkB homolog 7 [Source:RGD Symbol;Acc:1598126]
Alkbh8	chr6	LDG_10min_LTP	152	152	1	1	0	0	0	0	0	0	0	0	alkB homolog 8, tRNA methyltransferase [Source:RGD Symbol;Acc:1304687]
Alkbh8	chr6	RDG_10min_no_LTP	78.76	77.094	5	5	0	0	0	0	0	0	0	0	alkB homolog 8, tRNA methyltransferase [Source:RGD Symbol;Acc:1304687]
Alkbh8	chr6	RDG_60min_no_LTP	134.19	134.19	2	2	0	0	0	0	0	0	0	0	alkB homolog 8, tRNA methyltransferase [Source:RGD Symbol;Acc:1304687]
Allc	chr6	LDG_10min_LTP	350.12	350.12	1	0	1	1	1	1	0	0	0	0	allantoicase [Source:RGD Symbol;Acc:621804]
Allc	chr6	LDG_60min_LTP	128.56	146.732	6	6	0	0	0	0	0	0	0	0	allantoicase [Source:RGD Symbol;Acc:621804]
Allc	chr6	RDG_10min_no_LTP	40.35	40.35	1	1	0	0	0	0	0	0	0	0	allantoicase [Source:RGD Symbol;Acc:621804]
Allc	chr6	RDG_60min_no_LTP	194.84	202.4	3	2	1	1	0	0	1	1	0	0	allantoicase [Source:RGD Symbol;Acc:621804]
Alms1	chr4	LDG_10min_LTP	102.29	150.073	13	13	0	0	0	0	0	0	0	0	ALMS1, centrosome and basal body associated protein [Source:RGD Symbol;Acc:1311590]
Alms1	chr4	LDG_60min_LTP	269.58	270.152	5	4	1	1	0	0	1	1	0	0	ALMS1, centrosome and basal body associated protein [Source:RGD Symbol;Acc:1311590]
Alms1	chr4	RDG_10min_no_LTP	250.8	214.217	9	7	2	2	1	1	0	0	1	1	ALMS1, centrosome and basal body associated protein [Source:RGD Symbol;Acc:1311590]
Alms1	chr4	RDG_60min_no_LTP	193.84	183.533	15	15	0	0	0	0	0	0	0	0	ALMS1, centrosome and basal body associated protein [Source:RGD Symbol;Acc:1311590]
Alox12	chr10	LDG_10min_LTP	28.96	28.96	1	1	0	0	0	0	0	0	0	0	arachidonate 12-lipoxygenase, 12S type [Source:RGD Symbol;Acc:1311159]
Alox12b	chr10	LDG_10min_LTP	107.405	107.405	2	2	0	0	0	0	0	0	0	0	arachidonate 12-lipoxygenase, 12R type [Source:RGD Symbol;Acc:1305330]
Alox12b	chr10	LDG_60min_LTP	130.87	130.87	2	2	0	0	0	0	0	0	0	0	arachidonate 12-lipoxygenase, 12R type [Source:RGD Symbol;Acc:1305330]
Alox12b	chr10	RDG_10min_no_LTP	81.37	81.37	1	1	0	0	0	0	0	0	0	0	arachidonate 12-lipoxygenase, 12R type [Source:RGD Symbol;Acc:1305330]
Alox12b	chr10	RDG_60min_no_LTP	50.405	50.405	2	2	0	0	0	0	0	0	0	0	arachidonate 12-lipoxygenase, 12R type [Source:RGD Symbol;Acc:1305330]
Alox15	chr10	LDG_10min_LTP	203	203	1	1	0	0	0	0	0	0	0	0	arachidonate 15-lipoxygenase [Source:RGD Symbol;Acc:70493]
Alox15	chr10	LDG_60min_LTP	45.38	47.0167	9	9	0	0	0	0	0	0	0	0	arachidonate 15-lipoxygenase [Source:RGD Symbol;Acc:70493]
Alox15	chr10	RDG_10min_no_LTP	28.87	28.87	1	1	0	0	0	0	0	0	0	0	arachidonate 15-lipoxygenase [Source:RGD Symbol;Acc:70493]
Alox15	chr10	RDG_60min_no_LTP	47.11	56.8217	6	5	1	1	0	0	1	1	0	0	arachidonate 15-lipoxygenase [Source:RGD Symbol;Acc:70493]
Alox5	chr4	LDG_10min_LTP	109.07	117.583	3	3	0	0	0	0	0	0	0	0	arachidonate 5-lipoxygenase [Source:RGD Symbol;Acc:2096]
Alox5	chr4	RDG_10min_no_LTP	47.25	47.25	2	2	0	0	0	0	0	0	0	0	arachidonate 5-lipoxygenase [Source:RGD Symbol;Acc:2096]
Alox5	chr4	RDG_60min_no_LTP	98.81	98.81	1	1	0	0	0	0	0	0	0	0	arachidonate 5-lipoxygenase [Source:RGD Symbol;Acc:2096]
Alox5ap	chr12	LDG_10min_LTP	78.83	98.3811	9	9	0	0	0	0	0	0	0	0	arachidonate 5-lipoxygenase activating protein [Source:RGD Symbol;Acc:2097]
Alox5ap	chr12	LDG_60min_LTP	123.96	130.339	11	11	0	0	0	0	0	0	0	0	arachidonate 5-lipoxygenase activating protein [Source:RGD Symbol;Acc:2097]
Alox5ap	chr12	RDG_10min_no_LTP	123.87	122.255	6	6	0	0	0	0	0	0	0	0	arachidonate 5-lipoxygenase activating protein [Source:RGD Symbol;Acc:2097]
Alox5ap	chr12	RDG_60min_no_LTP	105.8	136.47	7	7	0	0	0	0	0	0	0	0	arachidonate 5-lipoxygenase activating protein [Source:RGD Symbol;Acc:2097]
Aloxe3	chr10	LDG_10min_LTP	127.93	127.93	1	1	0	0	0	0	0	0	0	0	arachidonate lipoxygenase 3 [Source:RGD Symbol;Acc:1306252]
Aloxe3	chr10	LDG_60min_LTP	177.57	183.758	6	5	1	1	0	0	0	0	1	1	arachidonate lipoxygenase 3 [Source:RGD Symbol;Acc:1306252]
Aloxe3	chr10	RDG_10min_no_LTP	195.53	233.16	3	3	0	0	0	0	0	0	0	0	arachidonate lipoxygenase 3 [Source:RGD Symbol;Acc:1306252]
Aloxe3	chr10	RDG_60min_no_LTP	178.9	178.9	2	1	1	2	1	1	0	0	1	1	arachidonate lipoxygenase 3 [Source:RGD Symbol;Acc:1306252]
Alpg	chr9	LDG_10min_LTP	258.41	258.41	1	1	0	0	0	0	0	0	0	0	alkaline phosphatase, germ cell [Source:RGD Symbol;Acc:1565100]
Alpg	chr9	LDG_60min_LTP	282.54	282.54	1	1	0	0	0	0	0	0	0	0	alkaline phosphatase, germ cell [Source:RGD Symbol;Acc:1565100]
Alpg	chr9	RDG_10min_no_LTP	217.64	217.64	1	1	0	0	0	0	0	0	0	0	alkaline phosphatase, germ cell [Source:RGD Symbol;Acc:1565100]
Alpg	chr9	RDG_60min_no_LTP	232.21	232.21	2	2	0	0	0	0	0	0	0	0	alkaline phosphatase, germ cell [Source:RGD Symbol;Acc:1565100]
Alpk1	chr2	LDG_10min_LTP	128.1	171.81	3	3	0	0	0	0	0	0	0	0	alpha-kinase 1 [Source:RGD Symbol;Acc:1304613]
Alpk1	chr2	LDG_60min_LTP	54.7	72.2443	7	7	0	0	0	0	0	0	0	0	alpha-kinase 1 [Source:RGD Symbol;Acc:1304613]
Alpk1	chr2	RDG_10min_no_LTP	137.5	142.95	8	8	0	0	0	0	0	0	0	0	alpha-kinase 1 [Source:RGD Symbol;Acc:1304613]
Alpk1	chr2	RDG_60min_no_LTP	108.71	101.564	5	4	1	1	0	0	1	1	0	0	alpha-kinase 1 [Source:RGD Symbol;Acc:1304613]
Alpk2	chr18	LDG_10min_LTP	105.685	105.685	2	2	0	0	0	0	0	0	0	0	alpha-kinase 2 [Source:RGD Symbol;Acc:1564431]
Alpk2	chr18	RDG_10min_no_LTP	77.78	77.78	1	1	0	0	0	0	0	0	0	0	alpha-kinase 2 [Source:RGD Symbol;Acc:1564431]
Alpk3	chr1	LDG_10min_LTP	60.77	60.77	1	1	0	0	0	0	0	0	0	0	alpha-kinase 3 [Source:RGD Symbol;Acc:1309860]
Alpk3	chr1	LDG_60min_LTP	106.42	99.9333	3	2	1	1	1	1	0	0	0	0	alpha-kinase 3 [Source:RGD Symbol;Acc:1309860]
Alpk3	chr1	RDG_10min_no_LTP	50.21	50.21	1	1	0	0	0	0	0	0	0	0	alpha-kinase 3 [Source:RGD Symbol;Acc:1309860]
Alpk3	chr1	RDG_60min_no_LTP	170.41	170.41	1	1	0	0	0	0	0	0	0	0	alpha-kinase 3 [Source:RGD Symbol;Acc:1309860]
Alpl	chr5	LDG_10min_LTP	92.155	95.8912	8	8	0	0	0	0	0	0	0	0	alkaline phosphatase, biomineralization associated [Source:RGD Symbol;Acc:2100]
Alpl	chr5	LDG_60min_LTP	112.32	131.193	7	7	0	0	0	0	0	0	0	0	alkaline phosphatase, biomineralization associated [Source:RGD Symbol;Acc:2100]
Alpl	chr5	RDG_10min_no_LTP	107.13	85.5414	7	7	0	0	0	0	0	0	0	0	alkaline phosphatase, biomineralization associated [Source:RGD Symbol;Acc:2100]
Alpl	chr5	RDG_60min_no_LTP	57.32	62.3878	9	9	0	0	0	0	0	0	0	0	alkaline phosphatase, biomineralization associated [Source:RGD Symbol;Acc:2100]
Als2	chr9	LDG_10min_LTP	132.86	133.243	25	23	2	2	0	0	2	2	0	0	alsin Rho guanine nucleotide exchange factor ALS2 [Source:RGD Symbol;Acc:1310372]
Als2	chr9	LDG_60min_LTP	119.94	119.586	26	25	1	2	1	1	0	0	1	1	alsin Rho guanine nucleotide exchange factor ALS2 [Source:RGD Symbol;Acc:1310372]
Als2	chr9	RDG_10min_no_LTP	79.385	117.886	28	27	1	1	0	0	1	1	0	0	alsin Rho guanine nucleotide exchange factor ALS2 [Source:RGD Symbol;Acc:1310372]
Als2	chr9	RDG_60min_no_LTP	185.865	174.652	24	24	0	0	0	0	0	0	0	0	alsin Rho guanine nucleotide exchange factor ALS2 [Source:RGD Symbol;Acc:1310372]
Als2cl	chr8	LDG_10min_LTP	185.32	171.297	6	6	0	0	0	0	0	0	0	0	ALS2 C-terminal like [Source:RGD Symbol;Acc:1305208]
Als2cl	chr8	LDG_60min_LTP	141.755	152.653	4	3	1	1	0	0	0	0	1	1	ALS2 C-terminal like [Source:RGD Symbol;Acc:1305208]
Als2cl	chr8	RDG_10min_no_LTP	44.075	70.6825	4	4	0	0	0	0	0	0	0	0	ALS2 C-terminal like [Source:RGD Symbol;Acc:1305208]
Als2cl	chr8	RDG_60min_no_LTP	137.485	124.03	4	4	0	0	0	0	0	0	0	0	ALS2 C-terminal like [Source:RGD Symbol;Acc:1305208]
Alx3	chr2	RDG_60min_no_LTP	159.28	159.28	1	1	0	0	0	0	0	0	0	0	ALX homeobox 3 [Source:RGD Symbol;Acc:1359270]
Alyref	chr10	LDG_10min_LTP	92.62	106.513	97	94	3	4	0	0	1	1	2	3	Aly/REF export factor [Source:RGD Symbol;Acc:1594679]
Alyref	chr10	LDG_60min_LTP	107.08	111.672	109	107	2	2	2	2	0	0	0	0	Aly/REF export factor [Source:RGD Symbol;Acc:1594679]
Alyref	chr10	RDG_10min_no_LTP	75.35	96.3661	56	55	1	1	1	1	0	0	0	0	Aly/REF export factor [Source:RGD Symbol;Acc:1594679]
Alyref	chr10	RDG_60min_no_LTP	102.41	106.561	89	87	2	3	2	3	0	0	0	0	Aly/REF export factor [Source:RGD Symbol;Acc:1594679]
Amacr	chr2	LDG_10min_LTP	116.48	113.984	25	23	2	2	1	1	0	0	1	1	alpha-methylacyl-CoA racemase [Source:RGD Symbol;Acc:3048]
Amacr	chr2	LDG_60min_LTP	102.665	103.947	12	12	0	0	0	0	0	0	0	0	alpha-methylacyl-CoA racemase [Source:RGD Symbol;Acc:3048]
Amacr	chr2	RDG_10min_no_LTP	117.6	133.435	19	19	0	0	0	0	0	0	0	0	alpha-methylacyl-CoA racemase [Source:RGD Symbol;Acc:3048]
Amacr	chr2	RDG_60min_no_LTP	99.44	109.33	27	25	2	2	2	2	0	0	0	0	alpha-methylacyl-CoA racemase [Source:RGD Symbol;Acc:3048]
Ambp	chr5	LDG_10min_LTP	10.89	10.89	1	1	0	0	0	0	0	0	0	0	alpha-1-microglobulin/bikunin precursor [Source:RGD Symbol;Acc:2102]
Ambp	chr5	LDG_60min_LTP	79.695	79.695	2	2	0	0	0	0	0	0	0	0	alpha-1-microglobulin/bikunin precursor [Source:RGD Symbol;Acc:2102]
Ambp	chr5	RDG_60min_no_LTP	45.29	46.2525	4	4	0	0	0	0	0	0	0	0	alpha-1-microglobulin/bikunin precursor [Source:RGD Symbol;Acc:2102]
Ambra1	chr3	LDG_10min_LTP	96.05	108.71	64	62	2	2	0	0	2	2	0	0	autophagy and beclin 1 regulator 1 [Source:RGD Symbol;Acc:621330]
Ambra1	chr3	LDG_60min_LTP	132.895	124.135	50	47	3	3	2	2	0	0	1	1	autophagy and beclin 1 regulator 1 [Source:RGD Symbol;Acc:621330]
Ambra1	chr3	RDG_10min_no_LTP	120.68	123.879	55	55	0	0	0	0	0	0	0	0	autophagy and beclin 1 regulator 1 [Source:RGD Symbol;Acc:621330]
Ambra1	chr3	RDG_60min_no_LTP	107.245	116.753	68	66	2	2	1	1	1	1	0	0	autophagy and beclin 1 regulator 1 [Source:RGD Symbol;Acc:621330]
Amd1	chr20	LDG_10min_LTP	152.73	150.985	298	289	9	11	4	5	2	2	4	4	adenosylmethionine decarboxylase 1 [Source:RGD Symbol;Acc:2104]
Amd1	chr20	LDG_60min_LTP	167.375	161.08	308	291	17	18	10	10	3	3	5	5	adenosylmethionine decarboxylase 1 [Source:RGD Symbol;Acc:2104]
Amd1	chr20	RDG_10min_no_LTP	125.17	134.314	149	144	5	5	2	2	3	3	0	0	adenosylmethionine decarboxylase 1 [Source:RGD Symbol;Acc:2104]
Amd1	chr20	RDG_60min_no_LTP	153.955	153.576	300	288	12	15	5	5	4	6	4	4	adenosylmethionine decarboxylase 1 [Source:RGD Symbol;Acc:2104]
Amdhd1	chr7	LDG_60min_LTP	29.19	29.19	1	1	0	0	0	0	0	0	0	0	amidohydrolase domain containing 1 [Source:RGD Symbol;Acc:1308879]
Amdhd2	chr10	LDG_10min_LTP	121.45	120.587	23	22	1	1	0	0	1	1	0	0	amidohydrolase domain containing 2 [Source:RGD Symbol;Acc:1304601]
Amdhd2	chr10	LDG_60min_LTP	113.52	125.656	13	13	0	0	0	0	0	0	0	0	amidohydrolase domain containing 2 [Source:RGD Symbol;Acc:1304601]
Amdhd2	chr10	RDG_10min_no_LTP	149.86	143.763	20	18	2	2	0	0	1	1	1	1	amidohydrolase domain containing 2 [Source:RGD Symbol;Acc:1304601]
Amdhd2	chr10	RDG_60min_no_LTP	115.77	116.515	27	26	1	1	0	0	0	0	1	1	amidohydrolase domain containing 2 [Source:RGD Symbol;Acc:1304601]
Amer1	chrX	LDG_10min_LTP	40.54	40.54	1	1	0	0	0	0	0	0	0	0	APC membrane recruitment protein 1 [Source:RGD Symbol;Acc:1560322]
Amer2	chr15	LDG_10min_LTP	106.14	124.255	51	51	0	0	0	0	0	0	0	0	APC membrane recruitment protein 2 [Source:RGD Symbol;Acc:1559605]
Amer2	chr15	LDG_60min_LTP	110.52	123.727	38	36	2	2	0	0	0	0	2	2	APC membrane recruitment protein 2 [Source:RGD Symbol;Acc:1559605]
Amer2	chr15	RDG_10min_no_LTP	93.795	122.032	26	26	0	0	0	0	0	0	0	0	APC membrane recruitment protein 2 [Source:RGD Symbol;Acc:1559605]
Amer2	chr15	RDG_60min_no_LTP	115.7	124.916	49	44	5	5	1	1	3	3	1	1	APC membrane recruitment protein 2 [Source:RGD Symbol;Acc:1559605]
Amer3	chr9	LDG_10min_LTP	106.53	110.24	36	33	3	5	2	3	1	1	1	1	APC membrane recruitment protein 3 [Source:RGD Symbol;Acc:1560420]
Amer3	chr9	LDG_60min_LTP	77.42	93.6758	19	17	2	3	0	0	2	2	1	1	APC membrane recruitment protein 3 [Source:RGD Symbol;Acc:1560420]
Amer3	chr9	RDG_10min_no_LTP	116.03	115.042	57	55	2	3	0	0	1	2	1	1	APC membrane recruitment protein 3 [Source:RGD Symbol;Acc:1560420]
Amer3	chr9	RDG_60min_no_LTP	95.43	106.145	68	67	1	1	1	1	0	0	0	0	APC membrane recruitment protein 3 [Source:RGD Symbol;Acc:1560420]
Amfr	chr19	LDG_10min_LTP	98.54	106.379	335	319	16	23	5	5	4	5	9	13	autocrine motility factor receptor [Source:RGD Symbol;Acc:1311551]
Amfr	chr19	LDG_60min_LTP	98.025	105.36	300	287	13	16	6	6	3	5	5	5	autocrine motility factor receptor [Source:RGD Symbol;Acc:1311551]
Amfr	chr19	RDG_10min_no_LTP	97.18	106.653	270	259	11	13	2	2	3	3	6	8	autocrine motility factor receptor [Source:RGD Symbol;Acc:1311551]
Amfr	chr19	RDG_60min_no_LTP	108.75	116.356	403	385	18	21	3	3	6	6	10	12	autocrine motility factor receptor [Source:RGD Symbol;Acc:1311551]
Amh	chr7	LDG_10min_LTP	94.82	94.82	1	1	0	0	0	0	0	0	0	0	anti-Mullerian hormone [Source:RGD Symbol;Acc:2108]
Amhr2	chr7	LDG_10min_LTP	172.87	172.87	1	1	0	0	0	0	0	0	0	0	anti-Mullerian hormone receptor type 2 [Source:RGD Symbol;Acc:70964]
Amigo1	chr2	LDG_10min_LTP	113.255	120.402	78	72	6	8	3	3	3	4	1	1	adhesion molecule with Ig like domain 1 [Source:RGD Symbol;Acc:1303079]
Amigo1	chr2	LDG_60min_LTP	97.085	98.3598	58	56	2	2	1	1	1	1	0	0	adhesion molecule with Ig like domain 1 [Source:RGD Symbol;Acc:1303079]
Amigo1	chr2	RDG_10min_no_LTP	128.53	132.033	64	63	1	1	0	0	0	0	1	1	adhesion molecule with Ig like domain 1 [Source:RGD Symbol;Acc:1303079]
Amigo1	chr2	RDG_60min_no_LTP	117.885	130.981	96	92	4	4	3	3	0	0	1	1	adhesion molecule with Ig like domain 1 [Source:RGD Symbol;Acc:1303079]
Amigo2	chr7	LDG_10min_LTP	128.89	119.564	13	12	1	1	1	1	0	0	0	0	adhesion molecule with Ig like domain 2 [Source:RGD Symbol;Acc:727911]
Amigo2	chr7	LDG_60min_LTP	122.835	110.95	6	6	0	0	0	0	0	0	0	0	adhesion molecule with Ig like domain 2 [Source:RGD Symbol;Acc:727911]
Amigo2	chr7	RDG_10min_no_LTP	82	122.835	13	13	0	0	0	0	0	0	0	0	adhesion molecule with Ig like domain 2 [Source:RGD Symbol;Acc:727911]
Amigo2	chr7	RDG_60min_no_LTP	106.86	110.808	26	26	0	0	0	0	0	0	0	0	adhesion molecule with Ig like domain 2 [Source:RGD Symbol;Acc:727911]
Amigo3	chr8	LDG_10min_LTP	86.685	104.067	6	6	0	0	0	0	0	0	0	0	adhesion molecule with Ig like domain 3 [Source:RGD Symbol;Acc:631413]
Amigo3	chr8	LDG_60min_LTP	90.85	90.5157	7	7	0	0	0	0	0	0	0	0	adhesion molecule with Ig like domain 3 [Source:RGD Symbol;Acc:631413]
Amigo3	chr8	RDG_10min_no_LTP	143.42	136.437	6	6	0	0	0	0	0	0	0	0	adhesion molecule with Ig like domain 3 [Source:RGD Symbol;Acc:631413]
Amigo3	chr8	RDG_60min_no_LTP	191.07	179.578	11	10	1	1	0	0	1	1	0	0	adhesion molecule with Ig like domain 3 [Source:RGD Symbol;Acc:631413]
Ammecr1	chrX	LDG_10min_LTP	39.565	58.3683	6	6	0	0	0	0	0	0	0	0	AMMECR nuclear protein 1 [Source:RGD Symbol;Acc:1561004]
Ammecr1	chrX	LDG_60min_LTP	85.38	85.38	1	1	0	0	0	0	0	0	0	0	AMMECR nuclear protein 1 [Source:RGD Symbol;Acc:1561004]
Ammecr1	chrX	RDG_10min_no_LTP	23.9	23.9	1	1	0	0	0	0	0	0	0	0	AMMECR nuclear protein 1 [Source:RGD Symbol;Acc:1561004]
Ammecr1	chrX	RDG_60min_no_LTP	227.995	227.995	2	2	0	0	0	0	0	0	0	0	AMMECR nuclear protein 1 [Source:RGD Symbol;Acc:1561004]
Ammecr1l	chr18	LDG_10min_LTP	194.615	175.107	22	22	0	0	0	0	0	0	0	0	AMMECR1 like [Source:RGD Symbol;Acc:1307915]
Ammecr1l	chr18	LDG_60min_LTP	116.645	118.641	20	20	0	0	0	0	0	0	0	0	AMMECR1 like [Source:RGD Symbol;Acc:1307915]
Ammecr1l	chr18	RDG_10min_no_LTP	129.12	127.228	21	21	0	0	0	0	0	0	0	0	AMMECR1 like [Source:RGD Symbol;Acc:1307915]
Ammecr1l	chr18	RDG_60min_no_LTP	187.83	171.543	21	21	0	0	0	0	0	0	0	0	AMMECR1 like [Source:RGD Symbol;Acc:1307915]
Amn1	chr4	LDG_10min_LTP	109.43	120.011	37	34	3	3	1	1	0	0	2	2	antagonist of mitotic exit network 1 homolog [Source:RGD Symbol;Acc:1308119]
Amn1	chr4	LDG_60min_LTP	92.73	119.116	29	29	0	0	0	0	0	0	0	0	antagonist of mitotic exit network 1 homolog [Source:RGD Symbol;Acc:1308119]
Amn1	chr4	RDG_10min_no_LTP	106.835	125.883	30	28	2	5	1	1	1	2	1	2	antagonist of mitotic exit network 1 homolog [Source:RGD Symbol;Acc:1308119]
Amn1	chr4	RDG_60min_no_LTP	124.92	128.322	33	30	3	3	3	3	0	0	0	0	antagonist of mitotic exit network 1 homolog [Source:RGD Symbol;Acc:1308119]
Amot	chrX	LDG_10min_LTP	114.405	112.341	30	29	1	2	1	2	0	0	0	0	angiomotin [Source:RGD Symbol;Acc:1564027]
Amot	chrX	LDG_60min_LTP	89.32	94.49	19	16	3	3	2	2	0	0	1	1	angiomotin [Source:RGD Symbol;Acc:1564027]
Amot	chrX	RDG_10min_no_LTP	106.57	111.251	23	22	1	1	1	1	0	0	0	0	angiomotin [Source:RGD Symbol;Acc:1564027]
Amot	chrX	RDG_60min_no_LTP	119.48	122.469	45	44	1	1	0	0	0	0	1	1	angiomotin [Source:RGD Symbol;Acc:1564027]
Amotl1	chr8	LDG_10min_LTP	89.41	100.639	17	17	0	0	0	0	0	0	0	0	angiomotin-like 1 [Source:RGD Symbol;Acc:1305268]
Amotl1	chr8	LDG_60min_LTP	96.11	118.346	22	21	1	1	1	1	0	0	0	0	angiomotin-like 1 [Source:RGD Symbol;Acc:1305268]
Amotl1	chr8	RDG_10min_no_LTP	96.27	95.4689	9	9	0	0	0	0	0	0	0	0	angiomotin-like 1 [Source:RGD Symbol;Acc:1305268]
Amotl1	chr8	RDG_60min_no_LTP	88.045	110.651	32	32	0	0	0	0	0	0	0	0	angiomotin-like 1 [Source:RGD Symbol;Acc:1305268]
Amotl2	chr8	LDG_10min_LTP	101.28	120.703	11	11	0	0	0	0	0	0	0	0	angiomotin like 2 [Source:RGD Symbol;Acc:70977]
Amotl2	chr8	LDG_60min_LTP	108.575	107.468	10	10	0	0	0	0	0	0	0	0	angiomotin like 2 [Source:RGD Symbol;Acc:70977]
Amotl2	chr8	RDG_10min_no_LTP	117.35	119.463	12	12	0	0	0	0	0	0	0	0	angiomotin like 2 [Source:RGD Symbol;Acc:70977]
Amotl2	chr8	RDG_60min_no_LTP	188.15	176.473	11	11	0	0	0	0	0	0	0	0	angiomotin like 2 [Source:RGD Symbol;Acc:70977]
Ampd2	chr2	LDG_10min_LTP	80.68	96.4302	115	114	1	1	0	0	1	1	0	0	adenosine monophosphate deaminase 2 [Source:RGD Symbol;Acc:2110]
Ampd2	chr2	LDG_60min_LTP	68.38	84.3614	79	78	1	1	1	1	0	0	0	0	adenosine monophosphate deaminase 2 [Source:RGD Symbol;Acc:2110]
Ampd2	chr2	RDG_10min_no_LTP	91.18	111.325	67	65	2	2	0	0	1	1	1	1	adenosine monophosphate deaminase 2 [Source:RGD Symbol;Acc:2110]
Ampd2	chr2	RDG_60min_no_LTP	102.9	114.334	127	125	2	2	1	1	0	0	1	1	adenosine monophosphate deaminase 2 [Source:RGD Symbol;Acc:2110]
Ampd3	chr1	LDG_10min_LTP	115.19	121.665	30	28	2	2	2	2	0	0	0	0	adenosine monophosphate deaminase 3 [Source:RGD Symbol;Acc:2111]
Ampd3	chr1	LDG_60min_LTP	139.61	147.203	27	27	0	0	0	0	0	0	0	0	adenosine monophosphate deaminase 3 [Source:RGD Symbol;Acc:2111]
Ampd3	chr1	RDG_10min_no_LTP	116.07	125.88	30	29	1	1	0	0	0	0	1	1	adenosine monophosphate deaminase 3 [Source:RGD Symbol;Acc:2111]
Ampd3	chr1	RDG_60min_no_LTP	120.39	139.103	49	47	2	4	0	0	1	2	2	2	adenosine monophosphate deaminase 3 [Source:RGD Symbol;Acc:2111]
Amph	chr17	LDG_10min_LTP	113	119.351	208	197	11	13	5	6	1	2	5	5
Amph	chr17	LDG_60min_LTP	114.37	121.499	169	164	5	5	2	2	1	1	2	2
Amph	chr17	RDG_10min_no_LTP	122.14	124.593	171	168	3	5	3	4	0	0	1	1
Amph	chr17	RDG_60min_no_LTP	125.62	128.605	273	261	12	15	7	9	1	1	4	5
Amt	chr8	LDG_10min_LTP	122.2	153.887	29	26	3	3	0	0	1	1	2	2	aminomethyltransferase [Source:RGD Symbol;Acc:1359408]
Amt	chr8	LDG_60min_LTP	156.05	159.271	18	18	0	0	0	0	0	0	0	0	aminomethyltransferase [Source:RGD Symbol;Acc:1359408]
Amt	chr8	RDG_10min_no_LTP	73.37	135.635	13	13	0	0	0	0	0	0	0	0	aminomethyltransferase [Source:RGD Symbol;Acc:1359408]
Amt	chr8	RDG_60min_no_LTP	159.24	184.317	30	28	2	2	0	0	2	2	0	0	aminomethyltransferase [Source:RGD Symbol;Acc:1359408]
Amz1	chr12	LDG_10min_LTP	105.66	123.456	20	17	3	3	2	2	0	0	1	1	archaelysin family metallopeptidase 1 [Source:RGD Symbol;Acc:1311314]
Amz1	chr12	LDG_60min_LTP	77	106.918	11	11	0	0	0	0	0	0	0	0	archaelysin family metallopeptidase 1 [Source:RGD Symbol;Acc:1311314]
Amz1	chr12	RDG_10min_no_LTP	128.4	144.598	5	5	0	0	0	0	0	0	0	0	archaelysin family metallopeptidase 1 [Source:RGD Symbol;Acc:1311314]
Amz1	chr12	RDG_60min_no_LTP	116.71	120.458	31	29	2	2	0	0	0	0	2	2	archaelysin family metallopeptidase 1 [Source:RGD Symbol;Acc:1311314]
Amz2	chr10	LDG_10min_LTP	125.4	135.517	100	97	3	4	0	0	3	4	0	0	archaelysin family metallopeptidase 2 [Source:RGD Symbol;Acc:1304846]
Amz2	chr10	LDG_60min_LTP	104.84	113.122	91	88	3	3	0	0	2	2	1	1	archaelysin family metallopeptidase 2 [Source:RGD Symbol;Acc:1304846]
Amz2	chr10	RDG_10min_no_LTP	135.055	145.655	98	96	2	3	1	1	1	1	1	1	archaelysin family metallopeptidase 2 [Source:RGD Symbol;Acc:1304846]
Amz2	chr10	RDG_60min_no_LTP	130.52	138.975	156	150	6	9	0	0	0	0	6	9	archaelysin family metallopeptidase 2 [Source:RGD Symbol;Acc:1304846]
Anapc1	chr3	LDG_10min_LTP	84.555	101.531	36	35	1	1	1	1	0	0	0	0	anaphase promoting complex subunit 1 [Source:RGD Symbol;Acc:1306629]
Anapc1	chr3	LDG_60min_LTP	67.675	88.5689	18	18	0	0	0	0	0	0	0	0	anaphase promoting complex subunit 1 [Source:RGD Symbol;Acc:1306629]
Anapc1	chr3	RDG_10min_no_LTP	124.69	137.556	29	29	0	0	0	0	0	0	0	0	anaphase promoting complex subunit 1 [Source:RGD Symbol;Acc:1306629]
[truncated: 61,473 more rows]

## Sheet: semi-templated
gene_name	strand	APA_site	seq_context	a_perc
Lrrc4b	+	94956309	CTCTGTAATTACTTTAAAAAAAAAAAAAAAAACACGGAAAAAGTAAAAAAAAAAAAAAAA	70
Trim8	+	245384513	TAATAATATTAATAATAATAAAGAGAAATAAAAGAAATAATGAATAAAAAACAAGAGCCC	63.3333
LOC108352861	+	94937817	TGCAACTGTTAAATAAAGCATTTGTATTCAAAAAAAAAAAAAAAAAAAAAAAAAAAAAAA	68.3333
Ap3m2	+	69237371	AGTTCGATCCCCAGCTCCAAAAAAAAAAAAAAAAGAACCAAAAAAAAAAAAAAAAAAAAA	70
Phyh	-	73329460	GCCATGCCTCACTCTTGAAGGGTTCTTTTTTTTCTTTTTTCTTTCTTTTTTTTTTTTTTT	65
Gnao1	-	11035290	ATCTTTTAATTTTTTTTGTTTTTCTTCCATCTTGTGGTATTTAAAAACTTTTATTTATTT	63.3333
B2m	+	109100822	TTTGTTATTTTTACTAAAAATAAAAAACTAAAAAAAACCAAAAAACCAAAAACCTAAAAA	61.6667
LOC100361457	+	72979689	AACACGTCATTGTGTAAAGAGAAATAAAAGTGCTGCAGTAAAAAAAAAAAAAAAAAAAAA	61.6667
LOC100362366	-	24019819	TGAGATGGCCAAGTTTTTTTATTTTTTTAATTTTGCTTTTTTTCTTTTATTGGATATTTT	63.3333
LOC685085	-	120933764	GTATCTTCACCCTTATTATTATTGTCATTAGCTGGTATTTATTTATTTTTTTTATTTTTT	61.6667
Capzb	+	151535409	CTTAAAAAAAAAAAAGGAAAAAAAGAACAAAAAAAATAAATAAAAAGAAACTGGGACACA	71.6667
LOC100360087	+	146323689	TCTTGGACCAAGTAAAAATAAAGCTTTTTGAAACAGCAAAAAAAAAAAAAAAAAAAAAAA	63.3333
Ptp4a2	+	142190912	AAAAAAAAAAACCAAAAAATAAATAAATGAATAAATAAATAAAAATAAAAGCAAAGAAAA	78.3333
Aco2	+	113428792	ATATATAATAAATGAATAAATCTTAAAAAAATAAATAAATACAAAGTAAACAAACAAAAA	68.3333
LOC100359937	+	89247131	TATAAGGTAAATGATTAACAATAAAGCCTCCATGTAAAGGCAAAAAAAAAAAAAAAAAAA	61.6667
Fbxl17	-	102986322	TTCATTCTTTATTTTAAATATATTGTGAATATCTGTTCTTTTTCTTTCTTTTTTTTAAGA	61.6667
Aco2	+	113428796	ATAATAAATGAATAAATCTTAAAAAAATAAATAAATACAAAGTAAACAAACAAAAAAAAG	70
Capzb	+	151535407	TACTTAAAAAAAAAAAAGGAAAAAAAGAACAAAAAAAATAAATAAAAAGAAACTGGGACA	71.6667
LOC100362366	-	24019825	GGCCAAGTTTTTTTATTTTTTTAATTTTGCTTTTTTTCTTTTATTGGATATTTTCTTTTT	68.3333
LOC103694169	-	6326339	TTTATTTTGCTCTTGCAACTCTCTCTCTGTTCAGGACTTTTTTTTTTTTTTTTTTTTTTT	66.6667
LOC108350501	-	140488293	TTGCTTTCTTTTTTTTTTTTTTTTTTTTTTTTTTTTTTTTTTTTTTTTTTTTTTTTTTTT	95
LOC679539	-	4703245	CACCATTTTTCTAGTGTTCCTTGCTACATCATTGTGTTCTTTTTTTTTTTTTTTTTTTTT	65
LOC685085	-	120933771	CACCCTTATTATTATTGTCATTAGCTGGTATTTATTTATTTTTTTTATTTTTTATTTTTT	65
LOC687679	-	87982671	GCGCCTCAGTAACCTTTGTTTTTTTTTTTTTTTTATATTTTTTTTTTGTTTTTTTTTTTT	73.3333
Ncoa1	-	27482056	CACCCACAAGGCTGGTTTTTTTTGTTTGTTTGTTTTTTGTTTTTTTGTTTTTTTGTTTTT	66.6667
Nrgn	-	37255952	TTTCTTTCTTTCTTTCTTTTTTTTCTTTTCTTTTCTTTTTTTTTTTTTTTTTTTTTTTTT	88.3333
Ppp2r5e	-	94171936	ATCTAGAGCACAGCCCTCGTTTTCCTTTTTTTTTTTTTTTTTTTTTTTTTTTTGCTTAAA	61.6667
Ptp4a2	+	142190903	CTTTTAGGAAAAAAAAAAAACCAAAAAATAAATAAATGAATAAATAAATAAAAATAAAAG	70
Sec14l1	+	102321772	AAAAAGAAATTAAAAAAAAAAAAAAAAAAAAAAGAAAACAGTAGGGTTTCCACCAGGTTT	63.3333
Serpine2	-	81124724	AAACAGTGTTTTTTTTTTTTTTTTTTGTTTTTGTTTGTTTTTTTTTTTAATATCATGTTC	71.6667
Usp2	+	44438392	AAAAAAAACAAAAACACAACAAAATCCTGACACGTGAGAGAAATAAAGTAAAATAAAGCT	61.6667
LOC100361060	+	180986204	GATGACCCCTCCCCCAATAAAAGATGGTTCTTAAAAAAAAAAAAAAAAAAAAAAAAAAAA	61.6667
Lrrc4b	+	94956308	GCTCTGTAATTACTTTAAAAAAAAAAAAAAAAACACGGAAAAAGTAAAAAAAAAAAAAAA	68.3333
Trim8	+	245384511	AATAATAATATTAATAATAATAAAGAGAAATAAAAGAAATAATGAATAAAAAACAAGAGC	66.6667
LOC108352861	+	94937816	CTGCAACTGTTAAATAAAGCATTTGTATTCAAAAAAAAAAAAAAAAAAAAAAAAAAAAAA	66.6667
Bdnf	+	96213109	AATAAACTGTCCCTCTTTCAGAAAACAGACAAAAAAACAAAAAACAAAAAAAAGCAAAAA	63.3333
LOC100361457	+	72979690	ACACGTCATTGTGTAAAGAGAAATAAAAGTGCTGCAGTAAAAAAAAAAAAAAAAAAAAAA	61.6667
LOC100360087	+	146323687	AGTCTTGGACCAAGTAAAAATAAAGCTTTTTGAAACAGCAAAAAAAAAAAAAAAAAAAAA	61.6667
Aco2	+	113428793	TATATAATAAATGAATAAATCTTAAAAAAATAAATAAATACAAAGTAAACAAACAAAAAA	68.3333
Gabrb1	-	36080392	TTTATTCTTCTGAGATGCTCAAGTTGTTTTTTTTTCTTTTTCTTTTCTTTTTTTTTTTTT	71.6667
Ncoa1	-	27234621	TCAATCTCCCAACAAAAGTGAACTTTTTTCTTTTCTTTTTTTTTTTTTTTTTTTTTTTTT	65
Stum	-	92175697	CAGGGTCCTGTTTTGTTGTTTTTTTGTTTTTTGTTTTTTGTTTTTTGTTTTTTTTTTTTT	76.6667
Usp2	+	44416200	CTCCGAAAAAAAGAACCCAAAAAAAAAAAAAAAAGATCTGAAATATGGACAATAAAACTT	61.6667
Fam168a	+	155203436	TTACTGTAAGCTGTAGAACATTCAACAACTATTAAAAGAAAGTTTCCAAAAAAAAAAAAA	53.3333
LOC100361060	+	180986203	TGATGACCCCTCCCCCAATAAAAGATGGTTCTTAAAAAAAAAAAAAAAAAAAAAAAAAAA	60
LOC687679	-	87982658	GCTCTGGAACCATGCGCCTCAGTAACCTTTGTTTTTTTTTTTTTTTTATATTTTTTTTTT	58.3333
Agfg2	+	19048430	AGCTTGTTTGGAGGCAATGTTGGAAAAGATTGCGTTTGAAAGGATTAAAAAAAAAAAAAA	45
Cox7a2l2	+	51301612	TATTGATGTGTATTAACTGCCACCAATAAAGCAGTCCTTAACCATTAAAAAAAAAAAAAA	48.3333
LOC679539	-	4703242	ACCCACCATTTTTCTAGTGTTCCTTGCTACATCATTGTGTTCTTTTTTTTTTTTTTTTTT	60
LOC100361933	+	15243105	CGAGGAGTACTTCAAATGCAAGAAATGAATAAATAAAATTTTGGCTCAAAAAAAAAAAAA	55
Homer1	+	24619216	GCGCTTACCTAGGAAGCGCAAGGCCCTGGGTTCGGTCCCCAGCTCCGAAAAAAAAAAAAA	33.3333
mrpl24	+	173389248	TTGCCTAGCAATCACAAGGCCCTAGGTTCAGTCCTCAGCTCCAAAAAAAAAAAAAAAAAA	45
Txnip	+	184096882	AGTGGGGCTATCCTTTGTAAAAAAAAAAAAAAATCAAAATAAAGTTTTTTAATGGCAAAA	50
LOC100364062	-	16878654	GACTTCCCAGGAACAGAGTGGCCACCACATCCCTCAATAGCCTTTTTTTTTTTTTTTTTT	40
Plekha3	+	61644649	ATTCTAAAGGCCTTTAGCCCAAATACCATGACATTTTGAGCATTAAAAAAAAAAAAAAAA	50
Rpl7a	+	10241269	TCTTCACCTGAATCAACTATGTGGTCATACTCTTCTTGTCTGAGGCAAAAAAAAAAAAAA	38.3333
LOC100911847	+	138350766	GGACTTCTCAAGTTATTTTCTGTTAATAAATTGCTTTGTAAGCTAAAAAAAAAAAAAAAA	45
Nkain1	+	142792665	TGTGGGCTGAGACCTCCCAGGTATCCATGCAGGTTGGTTGATTAAAAAAAAAAAAAAAAA	40
Actr10	+	89472348	GAGCACAAGGCCCTGGGTTTGGTCCCCAGCTCCGAAAAAAAGAAAAGAAAAAAAAAAAAA	48.3333
Bzw2	-	52828068	TCCCCAAACACTTCAGCATTCCCAACCGAAAAAGTGTGGCGGTTTTTTTTTTTTTTTTTT	41.6667
Usp2	+	44439665	CTCATAATTCTTTGCCGTGGGCTTGATTTCGCCCTGACATTAGACAAAAAAAAAAAAAAA	38.3333
Camk2b	-	80845233	CCAGCATAAAGCAGTCAGCTGTACTGGAAGCGATTCGTTCTTTTTTTTTTTTTTTTTTTT	48.3333
LOC100359922	-	5697592	CACAGCTAGAGTCATTTGGGAAGTGTGAAAATGCCGTCTTTTTTTTTTTTTTTTTTTTTT	51.6667
LOC100360057	-	119350431	CTGTAGTGGGACCTCGAGTGTCAAGTAAGAGATTGTTTTTTTTTTTTTTTTTTTTTTTTT	56.6667
LOC100362027	-	36831523	AGGCAGCTCCATTGGAGGTTTATCCCCATTGTAGCAACTGCTTTTTTTTTTTTTTTTTTT	50
LOC100362895	-	138132004	ATATTGGGTTGTAGGCAAACCTGTAGGGCATTTTCTTTTTTTTTTTTTTTTTTTTCTTTT	60
LOC100364062	-	16878655	ACTTCCCAGGAACAGAGTGGCCACCACATCCCTCAATAGCCTTTTTTTTTTTTTTTTTTT	41.6667
LOC100364457	-	76622590	TAACTGCTGAGCCATCTCTTTCTAGTCCCTGTATGGTACGGAAGCTTTTTTTTTTTTTTT	48.3333
LOC100365810	-	97785303	ACCTACCGCCACCTTAAAAACTAGACTACTTTAAAAGGGGTTCTGTATTTTTTTTTTTTT	41.6667
LOC103692785	-	30758067	TTATTTTTAACCTTGCTGACCCATTTTGACAGCCATCTTCCTTCTTTTTTTTTTTTTTTT	58.3333
LOC108348509	-	10477836	ATTTCCTGAATAAATGCAAGTTTATTCAACAAATGTTAAGTTTTTTTTTTTTTTTTTTTT	56.6667
LOC684988	-	10128102	AGTGTCAGGACAGGAAAAGGTTAGTCATGGCTGAGAGGGTTCTTTTTTTTTTTTTTTTTT	45
LOC689955	-	34624039	AGAGAGAGAGAGAGAGAGAGAGAGAGAGAGAGCTTAAGAAGCAATTCTTTTTTTTTTTTT	28.3333
Mrpl48	-	154896975	AAAATGAGAAGATGTTTAGACAAAGAGAAACAGAATTCCTTTTTTTTTTTTTTTTTTTTT	46.6667
Palm	-	9886658	CGCCCAGATGAAACCCAAGAACTTCAGCAACCTGGCTCTGCACACTTTTTTTTTTTTTTT	35
Phactr1	-	21560379	AGTGGTCCCTGCTGACGGTCGATAAAACAACACAGTAGTCAAAGCTTTTTTTTTTTTTTT	38.3333
Rab36	-	13608024	CAGCCACCCAACTTGGGTGCTAGAGATGGAAAGCAGCACATACTCTTTTTTTTTTTTTTT	36.6667
Rasgrf2	-	23114656	TGTTGGGGAATGACATTAAAGTTGAAAAGAAAAGCTAAAACATCCTTTTTTTTTTTTTTT	41.6667
Reep5	-	25946943	GGGATGGGCTGTCTTGGGGGATGGGATGTCTTACTCATCTGTATCACTTTTTTTTTTTTT	46.6667
Rimkla	-	133078102	CCCAGCGCGCTGAGATTACAGAGTGTCCTGTGCCTGCTCTTTTTTTTTTTTTTTTTTTTT	50
Rps15al4	-	54437565	GAACATTGGTAACAACTTGTAAATACACAGAACGGAATCTTTTTTTTTTTTTTTTTTTTT	48.3333
Tma7	-	109726261	GACAACGAGCCATCGCGTTACTCAGTTTATTGGTTTGTTTTTTTTTTTTTTTTTTTTTTT	58.3333
Ube4b	-	159767150	ACAAGCAGACAGATTTCCACATTTCTTGCACCCTTTTTTTTTTTTTTTTTTTTTTTTTTT	58.3333
Fam168a	+	155203437	TACTGTAAGCTGTAGAACATTCAACAACTATTAAAAGAAAGTTTCCAAAAAAAAAAAAAA	55
Pgp	+	13496387	AAAGATCTCGTGTCTTTAATCTCTGGAATAAAAAAAAAAAAAAAAAGAAAAGAAAAAGAA	60
Agfg2	+	19048431	GCTTGTTTGGAGGCAATGTTGGAAAAGATTGCGTTTGAAAGGATTAAAAAAAAAAAAAAA	45
Txnip	+	184096880	AAAGTGGGGCTATCCTTTGTAAAAAAAAAAAAAAATCAAAATAAAGTTTTTTAATGGCAA	50
LOC685963	+	155981001	AATGAACAGGACCTCTGCATGTGACTATTAAAAACCCTGAAAAGTCAAAAAAAAAAAAAA	53.3333
Plekha3	+	61644646	GATATTCTAAAGGCCTTTAGCCCAAATACCATGACATTTTGAGCATTAAAAAAAAAAAAA	46.6667
Rpl7a	+	10241268	TTCTTCACCTGAATCAACTATGTGGTCATACTCTTCTTGTCTGAGGCAAAAAAAAAAAAA	36.6667
Cyp51	+	30054613	AGAAAAATCCAAAATCAAATCCTTGTGGAATTTTTAATTTTAATTAAAAAAAAAAAAAAA	56.6667
Nkain1	+	142792663	CTTGTGGGCTGAGACCTCCCAGGTATCCATGCAGGTTGGTTGATTAAAAAAAAAAAAAAA	36.6667
Usp2	+	44439666	TCATAATTCTTTGCCGTGGGCTTGATTTCGCCCTGACATTAGACAAAAAAAAAAAAAAAA	40
Frrs1l	-	71661438	ACAACCCTGTCTGAGTAGGAGAGAAACTAAACTTGCTCTTTTTTTTTTTTTTTTTTTTTT	50
Grin1	-	8112676	CCAAACCCAGGGCCTTGCACTTGCATACGTTTGTTTTTTTTTTTTTTTTTTTTTTTTTTT	58.3333
Mrpl48	-	154896973	GTAAAATGAGAAGATGTTTAGACAAAGAGAAACAGAATTCCTTTTTTTTTTTTTTTTTTT	45
Nfe2l1	-	81810993	CTGCAGGCTGCTCACATGAACAGCTGATGGATTTCTTTCTTCCCTTTTTTTTTTTTTTTT	50
Ntrk2	-	5635720	TATAATAAAGCTTCGTATTATAGTGGGGTATGCACCTGATTTCTTTTTTTTTTTTTTTTT	55
Rab11fip3	-	15070671	GACTCAATGAATCTCAAGCTTTCCAGTCAGTCATAATGAACCTTTCTTTTTTTTTTTTTT	46.6667
Rbfox1	-	8524328	CGTTGCTTTTTTTTTTTTTTTTTAAACCCTCTTGCCTGGTCGCTACAGCTTTTTTTTTTT	60
Tsc22d4	-	18951609	CGAGCTGAGCTGGAGAGAGGACCTGGGGACTAAAGATGCCTTTTTTTTTTTTTTTTTTTT	41.6667
Samd4b	-		TGCAGGGAAGGCTTTCTTTTTTTCCTTTTTTCCTTTTTTTTTTTTTTTTTGGTTTTGTTT	68.3333
Eif3k	-		TTTTTTTTTTTTTTTTTTTTTGCTATTGTGTTTTGTCTTCTAAACATTTATTTTAGAAGG	66.6667
Lrrc4b	+		TCTGTAATTACTTTAAAAAAAAAAAAAAAAACACGGAAAAAGTAAAAAAAAAAAAAAAAA	71.6667
LOC100361060	+		ATGACCCCTCCCCCAATAAAAGATGGTTCTTAAAAAAAAAAAAAAAAAAAAAAAAAAAAA	63.3333
LOC108352861	+		GCAACTGTTAAATAAAGCATTTGTATTCAAAAAAAAAAAAAAAAAAAAAAAAAAAAAAAA	70
Jph4	-		TTTTTGGAACTTTTTTATTAATATACTTTTTTTTGTTAAATTTCTTTGTATTTTTTTTTT	70
Bnip3l	-		TTTTTTTTTTCCTTGTGTTTTGCCTTCTTTTTTTTTTTTTTTTTTTTTTTTTTTTTCCTT	83.3333
Ap3m2	+		TTCGATCCCCAGCTCCAAAAAAAAAAAAAAAAGAACCAAAAAAAAAAAAAAAAAAAAAAA	71.6667
Phactr1	-		TTTTTTTTTTTTTTTTAAACTTTTTTTTTTTTTTGGTTTGGCTTGTTTTTAAAGAAACTG	68.3333
LOC103694169	-		TTTTTTTTTTTTTTTTTTTTTTTTGAAAGGTTCTAAATTTTATTACTGGACAAATTAGTT	63.3333
Map1b	-		TGAACTTTTGCCACTTTGTATTTTATTGTGGAACTCAGTTTCTTTTTTCTTTTTTTTTTT	61.6667
Rps15al4	-		TTTTTTTTTTTTTTTTTTTTTTCACAGTCCACAGAGGCTTTTTATTTATGCTTTACATTT	63.3333
Hdgf	+		AGGAAATGTTTTTAATAAAAGAAAATTACCCAAAAAAAAAACCCACAAAAAAAAAAAAAA	66.6667
Sv2a	+		TTTGTAAAATGTTAAAAAAAAAAAAAAGTTAAAAGGAAGTTAAACTAAAAAAAAAAAAAA	68.3333
LOC100361457	+		ACGTCATTGTGTAAAGAGAAATAAAAGTGCTGCAGTAAAAAAAAAAAAAAAAAAAAAAAA	63.3333
LOC108350501	-		TTTTTTTTTTTTTTTTTTTTTTTTTTTTTTTTTTTTTTTTTTTTTTTTTTTTTGAGGCCT	90
Tnpo3	-		TTTGAAAAATTGGTTTTTATTTTTTTTTCCTTTTTTTTTTTTTTTTTTTTTTTTTTTTTT	81.6667
LOC100360057	-		TTTTTTTTTTTTTTTTTTTTTTTTTTGTTCCTAAATTTTATTTATGAATTAATACAAAAC	66.6667
LOC100362895	-		TTTTTTTTTTTTTTTTTTTTCTTTTTATCTCATCTGTATTTACCTTTTTAAAGCAGAATG	65
Ptp4a2	+		AAAAAAACCAAAAAATAAATAAATGAATAAATAAATAAAAATAAAAGCAAAGAAAAAGCA	75
LOC100360087	+		CTTGGACCAAGTAAAAATAAAGCTTTTTGAAACAGCAAAAAAAAAAAAAAAAAAAAAAAA	65
Lrp1	-		TTTTTTTCCTTTTCTTTTTTTTTCCTTTTTTACAATTTTATTTATAACAATATCTGTGTT	66.6667
Aco2	+		TATAATAAATGAATAAATCTTAAAAAAATAAATAAATACAAAGTAAACAAACAAAAAAAA	70
LOC100359937	+		TAAGGTAAATGATTAACAATAAAGCCTCCATGTAAAGGCAAAAAAAAAAAAAAAAAAAAA	63.3333
Dock10	-		TTTTTTTTTTTTTTTTTTTTGTTTTTTGGTAATTTTCAAGCTAAGACTCTTTCTTGGCCC	63.3333
Pja1	-		TTTATTTTTATTTTTTTATTTATTTTTATTATTTTTACCATTTTGACAGTTTCTTTTTCT	71.6667
Atp2b3	+		AAAAGAAAAGAAAAAGAAAGAAAGAGAGAAAGAAAGAAAGAAAGAAAGAAAGAAAGAAAG	75
LOC100364457	-		TTTTTTTTTTTTTTTTCAATATATAAGTCTTTTATTGTTTCCACAGAGCCCAAACTGTAC	51.6667
LOC108348989	+		TTTGTTGACATTCTGAATGCTTCTAAGTAAATACAATTTTTTTTATTAAAAAAAAAAAAA	43.3333
LOC687679	-		TTTTTTTTTTTTTGATATCACAAAAGTTTATTTAGCAAAAAGTTTCATATGAAAATGTAC	46.6667
Fam168a	+		TGTAAGCTGTAGAACATTCAACAACTATTAAAAGAAAGTTTCCAAAAAAAAAAAAAAAAA	58.3333
Spon1	+		ACCCCTGAATATGTATTTTTCCTTAACACAAGAGAGCCTGTTCAATTAAAAAAAAAAAAA	45
Drap1	-		TTTTTTTTTTTTTAAAAAGATTTATTCATGTATTATATATAAGTACACTGTAGCTGTCTT	53.3333
Eif3a	-		TTTTTTTTTTTTTTAAAACACAGCTACACACTCCAAAATTGAAGTCAACACAGTCATCAC	35
Rbfox1	-		TTTTTGATTTTTTTTTTTTTTAGTTGTTTCTTTGAGTTGCTAAAGTGATGTCCTACTGCA	58.3333
LOC100362027	-		TTTTTTTTTTTTTTTTTTTTAAAAGGAGCTCTGGCAAAGTTTTATTAAAGGAGAACTTTC	51.6667
Camkk1	+		ACTTCTTAGGAAGTGAATTAAAAACAATAAAAGCCCTTTGTTGAGTTAAAAAAAAAAAAA	51.6667
Cd47	-		TTTTTTTTTTTTTTTGCCTTTAAACCAGAGGTCTGGAATACATATGTTACAACCATAGCT	45
Agfg2	+		TGTTTGGAGGCAATGTTGGAAAAGATTGCGTTTGAAAGGATTAAAAAAAAAAAAAAAAAA	50
Kifap3	+		CGATGAGGCTAATGAGGAAGGGCTCTTGACGTGCAGATTTGAAAAAAAAAAAAAGACAAA	45
LOC108352650	+		CTAGTCTTTGTGCACACAGAATAAAAAACTGAAGGCCTCTAAAAAAAAAAAAAAAAGAAA	55
LOC103692785	-		TTTTTTTTTTTTTTTTTCAGTTTGAAAGGTTCTAAATTTTATTACTGGACAAATTAGTTC	56.6667
Gabrb1	-		TTTTTTTTTTTTTAAATTTTCTATTTAATTGTTTGGCAGCATGAGATGGTTACAGTTTAC	55
Cox7a2l2	+		ATTGATGTGTATTAACTGCCACCAATAAAGCAGTCCTTAACCATTAAAAAAAAAAAAAAA	50
Actr2	-		TTTTTTTTTTTTTTTTTTTAAAAGGGAAAAAGAAAAAGCATTAGAGGCGTGATGGGGACA	38.3333
Smim7	+		GGTGTGTCTGAAGACAGCTACAGTGTACTTATATATAATAAATCTTTAAAAAAAAAAAAA	46.6667
Tmed9	-		TTTCTTCTTCATCTTTTTTTTTTTTTAATTGGGAAACCAATGTAACAAACCCACACTCAT	45
LOC108348509	-		TTTTTTTTTTTTTTTTTTTACAAGAGCACAAATCTACTTTTATTTATTTACTCTCCATTA	58.3333
LOC100361933	+		GAGGAGTACTTCAAATGCAAGAAATGAATAAATAAAATTTTGGCTCAAAAAAAAAAAAAA	56.6667
Pcdh1	-		TTTTGTTTTTTTTTTTTTTGAGCTGGGGGCCGAACCCAGGGCTTTGCGCTTTCTAGGTAA	45
Agt	-		TCAAATAAAAAGGGAATTTTTTTTTTTTTATTTCACAAACAGTTGTTTGGTCCATTTTTT	50
Egln1	-		TTTTTTTTTTTTTCAAGAACATTTATACATCTTTTTAATTAGATTAGCTTTACAAGCAAC	50
Homer1	+		CGCTTACCTAGGAAGCGCAAGGCCCTGGGTTCGGTCCCCAGCTCCGAAAAAAAAAAAAAA	35
Rgs7bp	-		TTTTTTTTTTTTTTTTTTCCTCTCCTTGATGGCAGCTGCTTTCAAGTGTGAAATCATTTA	55
mrpl24	+		GCCTAGCAATCACAAGGCCCTAGGTTCAGTCCTCAGCTCCAAAAAAAAAAAAAAAAAAAA	48.3333
Txnip	+		GTGGGGCTATCCTTTGTAAAAAAAAAAAAAAATCAAAATAAAGTTTTTTAATGGCAAAAA	50
LOC690468	-		TTTTTTTTTTTTTTTGACTTTTCAGGGTTTTTAATAGTCACATGCAGAGGTCCTGTTCAT	53.3333
Celsr2	-		TTTTTTTTTTTTTTCTGAAAAACTTTGTCTTGGAGATGTTGGCCCCCAAGGGTCCAAAGT	43.3333
LOC684988	-		TTTTTTTTTTTTTTTTTTTACTCAAAGTGATTTTATTGCTTGTGTACGCAACAGCATTTA	56.6667
Rpl7a	+		CTTCACCTGAATCAACTATGTGGTCATACTCTTCTTGTCTGAGGCAAAAAAAAAAAAAAA	40
LOC100362366	-		TTTTTTTTTTTTTGTTTTCAGGTTTATTGAAAATATGGCATAACGGATTAAACAGCTCCA	46.6667
Plekha3	+		TTCTAAAGGCCTTTAGCCCAAATACCATGACATTTTGAGCATTAAAAAAAAAAAAAAAAA	50
Neurod1	-		TTTTTTTTTTTTTACAATTAGAGAAGAAAGAAGTGCTAAGGCAACGCAATAACTTTCTAA	36.6667
Mpped2	+		AGATGTGGCCCCAATTTAGAGCAATCTTGACAGAAGTAGGTTTGGAAAAAAAAAAAAAAA	46.6667
Inafm2	+		TTTATTGAGCCAAGTGGACTTCAAAACTCAAAAGAAACTTGTCCAAAAAAAAAAAAAAAA	53.3333
LOC685963	+		ATGAACAGGACCTCTGCATGTGACTATTAAAAACCCTGAAAAGTCAAAAAAAAAAAAAAA	53.3333
Adnp	-		TTTTTTTTTTTTTTTTTTTTTTTTTGAGACACCATCTTGTAGCCCAGGCAAAAGATGGCC	50
Serbp1	+		TTCAAAGCTTTTGCATGCTTAAGGATCCCAAACAACTAAGAATTAAAAAAAAAAAAAAAA	53.3333
Vcp	-		TCCATTTTGACCCAACATTTATTATCCTTTTACAACATGTCTTTTTTTTTTTTTTTTTTT	60
LOC100911847	+		GACTTCTCAAGTTATTTTCTGTTAATAAATTGCTTTGTAAGCTAAAAAAAAAAAAAAAAA	46.6667
Nkain1	+		GTGGGCTGAGACCTCCCAGGTATCCATGCAGGTTGGTTGATTAAAAAAAAAAAAAAAAAA	41.6667
Sesn2	-		TTTTTTTTTTTTTGGCAAGCACTCTAGGCAGAACCCAAGGGATGAGGAGAATGGGACGCC	28.3333
Cdc42	-		TTTGTGGGGATTTGCGTTGTTTTTTTTTTTTTTTTAAACAAGGAAACAAAACTAGCACTC	45
LOC100362684	+		ATTGCAGATGCCTAAGTCAACTGTTTAAATAAATTGACTTAATTGTTAAAAAAAAAAAAA	48.3333
LOC100362830	-		TTTTTTTTTTTTTTTATGAATGACATTTTATTCAGTCATTTTCTTTACAACTGAAACTCT	56.6667
Rab10	-		TTTTTTTTTTTTTTTTGATATTCAGAAAGTGCAGATTTAACAAAGGAGGCCATATCTTTT	48.3333
Ncoa1	-		TTTTTTTTTTTTTTTTTTGCTCCAAATGCTACGACCTGAAGAATGGCTGCAGATTGAGAT	45
Actr10	+		CACAAGGCCCTGGGTTTGGTCCCCAGCTCCGAAAAAAAGAAAAGAAAAAAAAAAAAAAAA	51.6667
Vti1b	-		TTTTTTTTTTTTTTTTTTTTGAGACAAGGTCTTGTGTAGTTAAAATGGACTTGAAACTCA	51.6667
Snw1	-		TTTTTCTAAATGTGTTTTTTTTTTTTTTTTTGAAACTAGTTTGCACTAAGCAAGAACTTG	53.3333
Tle5	-		TTTTTTTTTTTTTGAGACAGGGTCTCATGTAGCTCAGGCTAGCCCTGAACTCACTATGTA	40
LOC100359922	-		TTTTTTTTTTTTTTTTTTTTTTTGCTTTATGGAAAATTTATTACAACTCTCCAGCCGCGC	56.6667
Cdc37	-		TTTTTTTTTTTTTTTAAACACTGCTAGAACAAAAACCGCAGGTTAAACCAAGCTTTGTTA	40
Scn3b	+		CTAACTTACTTACTTGGCAAGCTCCAGGAGAGTGAGACGCTGTCTCAAAAAAAAAAAAAA	41.6667
Usp2	+		TAATTCTTTGCCGTGGGCTTGATTTCGCCCTGACATTAGACAAAAAAAAAAAAAAAAAAA	43.3333
LOC100365810	-		TTTTTTTTTTTTTTGTTTTCAGGTTTATTGAAAATATGGCATAACGGATTAAACAGCTCC	48.3333
Manf	-		TTTTTTTTTTTTTTGGGAAAATGGATGTATTATGACACTGGTTTTTATTAAAGAATTTTA	53.3333
Fam117b	+		CGCAAGGCCCTGGATTCAGTCCCCAGCTCCGAAAAGAAAAAAAAAAAAAAAAAAAAAAAA	55
