# Supplementary material
Source: HighWire-hosted journal article supplement (doi:10.1101/rna.080485.125)
Supplement: Supplementary_Table_6.xlsx [file Supplementary_Table_6.xlsx]

## Sheet: synapto_DRS
gene_name	chrom	NMDA_10min_counts	not_stimulated_counts	NMDA_10min_polya_gm_mean	not_stimulated_polya_gm_mean	polya_length_diff	polya_fold_change	polya_pvalue	polya_padj	polya_sig	polya_cohen_d	polya_effect_size	diffexp_baseMean	diffexp_baseMean_1	diffexp_baseMean_2	diffexp_lfcSE	diffexp_stat	diffexp_fold_change	diffexp_pvalue	diffexp_padj	diffexp_sig	diffexp_effect	gene_description
ATP6	chrM	50227	46447	57.7241	60.1142	2.39016	1.04141	5.34998e-111	5.09318e-107	FDR<0.05	-0.0812516	negligible	13682.2	11969.2	15395.3	0.111312	3.26204	1.28624	0.00110613	0.0341056	FDR<0.05	nonsignificant	mitochondrially encoded ATP synthase membrane subunit 6 [Source:RGD Symbol;Acc:621239]
CYTB	chrM	22673	20633	59.8485	62.8752	3.0267	1.05057	2.00585e-80	9.54786e-77	FDR<0.05	-0.10921	negligible	4570.3	4220.76	4919.85	0.123739	1.78541	1.16563	0.0741954	0.286616	Not Sig	nonsignificant	mitochondrially encoded cytochrome b [Source:RGD Symbol;Acc:620081]
COX2	chrM	48606	43653	52.6021	54.4169	1.81485	1.0345	5.66068e-67	1.79632e-63	FDR<0.05	-0.0644284	negligible	12467.7	10732.2	14203.1	0.0924904	4.36846	1.32341	1.25126e-05	0.00274383	FDR<0.05	nonsignificant	mitochondrially encoded cytochrome c oxidase II [Source:RGD Symbol;Acc:621872]
ND1	chrM	21489	21058	50.6762	53.4043	2.72811	1.05383	6.01174e-53	1.43079e-49	FDR<0.05	-0.0845883	negligible	5543.87	5097.77	5989.96	0.126425	1.83992	1.17502	0.0657793	0.26976	Not Sig	nonsignificant	mitochondrially encoded NADH:ubiquinone oxidoreductase core subunit 1 [Source:RGD Symbol;Acc:620555]
ND4	chrM	16648	14733	51.8218	54.8452	3.02343	1.05834	8.16648e-52	1.5549e-48	FDR<0.05	-0.090701	negligible	2994.75	2752	3237.5	0.179165	1.30419	1.17642	0.192169	0.496063	Not Sig	nonsignificant	mitochondrially encoded NADH:ubiquinone oxidoreductase core subunit 4 [Source:RGD Symbol;Acc:620559]
COX3	chrM	60147	52111	66.0792	67.7983	1.71915	1.02602	7.45574e-49	1.18298e-45	FDR<0.05	-0.0503221	negligible	14944.1	12676.6	17211.6	0.110172	4.00462	1.35775	6.21167e-05	0.00725817	FDR<0.05	nonsignificant	mitochondrially encoded cytochrome c oxidase III [Source:RGD Symbol;Acc:621873]
COX1	chrM	28330	23086	60.1576	62.7292	2.57163	1.04275	9.96438e-41	1.35516e-37	FDR<0.05	-0.087975	negligible	4550.36	3802.05	5298.68	0.178841	2.67156	1.39364	0.00754998	0.0997676	Not Sig	nonsignificant	mitochondrially encoded cytochrome c oxidase I [Source:RGD Symbol;Acc:621871]
ND2	chrM	13379	11632	51.3638	54.1714	2.80753	1.05466	3.37466e-30	4.01584e-27	FDR<0.05	-0.0918324	negligible	2821.58	2488.09	3155.07	0.176411	1.9385	1.26807	0.0525621	0.235892	Not Sig	nonsignificant	mitochondrially encoded NADH:ubiquinone oxidoreductase core subunit 2 [Source:RGD Symbol;Acc:620556]
Fth1	chr1	6280	5331	62.4595	67.0701	4.61055	1.07382	1.63458e-11	1.72903e-08	FDR<0.05	-0.11861	negligible	1630.49	1404.39	1856.58	0.176425	2.29071	1.32198	0.0219802	0.155352	Not Sig	nonsignificant	ferritin heavy chain 1 [Source:RGD Symbol;Acc:2635]
Mbp	chr18	37558	28758	79.8536	82.4054	2.5518	1.03196	4.39253e-07	0.000418169	FDR<0.05	-0.0413786	negligible	7098.22	5949.47	8246.96	0.134044	3.51746	1.38617	0.000435693	0.0234009	FDR<0.05	nonsignificant	myelin basic protein [Source:RGD Symbol;Acc:3054]
Gapdh	chr4	2745	3122	72.1662	78.8322	6.66605	1.09237	2.55572e-06	0.00221186	FDR<0.05	-0.103348	negligible	130.524	123.144	137.904	0.20638	0.871774	1.11986	0.383332	0.65746	Not Sig	nonsignificant
Calm3	chr1	597	762	77.0784	89.4293	12.3509	1.16024	4.86333e-06	0.00385824	FDR<0.05	-0.231034	small	77.9864	68.2191	87.7536	0.185873	2.02088	1.28635	0.0432926	0.21453	Not Sig	nonsignificant	calmodulin 3 [Source:RGD Symbol;Acc:2259]
Tuba1a	chr7	2524	2633	63.3295	69.4515	6.12204	1.09667	6.92902e-06	0.00507418	FDR<0.05	-0.125201	negligible	570.952	560.169	581.735	0.126991	0.38617	1.0385	0.699371	0.866015	Not Sig	nonsignificant	tubulin, alpha 1A [Source:RGD Symbol;Acc:619717]
Fkbp1a	chr3	488	602	85.8505	102.235	16.3844	1.19085	1.08839e-05	0.00740102	FDR<0.05	-0.22978	small	125.07	130.988	119.152	0.170187	-0.785555	0.909637	0.432128	0.693909	Not Sig	nonsignificant	FKBP prolyl isomerase 1A [Source:RGD Symbol;Acc:2617]
Hba-a1	chr10	37942	28144	46.1712	46.9147	0.743533	1.0161	1.73148e-05	0.0108521	FDR<0.05	-0.0316004	negligible	10010	8246.52	11773.5	0.567064	0.906024	1.4277	0.364923	0.648705	Not Sig	nonsignificant	hemoglobin alpha, adult chain 1 [Source:RGD Symbol;Acc:2782]
Cst3	chr3	11556	11270	60.5118	62.9826	2.47081	1.04083	1.82388e-05	0.0108521	FDR<0.05	-0.052174	negligible	3149.21	2869.67	3428.75	0.126092	2.0421	1.19482	0.0411414	0.21077	Not Sig	nonsignificant	cystatin C [Source:RGD Symbol;Acc:2432]
Idh3b	chr3	146	121	62.7565	95.8158	33.0592	1.52679	4.99433e-05	0.0264145	FDR<0.05	-0.467528	small	33.3677	27.6705	39.065	0.25957	1.82552	1.41179	0.0679222	0.274438	Not Sig	nonsignificant	isocitrate dehydrogenase (NAD(+)) 3 non-catalytic subunit beta [Source:RGD Symbol;Acc:621881]
Efhd2	chr5	187	173	48.3062	68.6898	20.3836	1.42197	0.000150179	0.0719391	NotSig	-0.405454	small	36.3979	31.5515	41.2443	0.245225	1.51194	1.30721	0.13055	0.39593	Not Sig	nonsignificant	EF-hand domain family, member D2 [Source:RGD Symbol;Acc:1307585]
Cfl1	chr1	1107	1170	74.4192	81.1249	6.70577	1.09011	0.000168864	0.0749765	NotSig	-0.154855	negligible	303.639	284.393	322.886	0.126048	1.42132	1.13535	0.155224	0.433419	Not Sig	nonsignificant	cofilin 1 [Source:RGD Symbol;Acc:69285]
Snx3	chr20	381	378	63.193	77.9485	14.7556	1.2335	0.000173265	0.0749765	NotSig	-0.279247	small	100.498	91.5177	109.479	0.179121	1.36467	1.19626	0.172356	0.46419	Not Sig	nonsignificant	sorting nexin 3 [Source:RGD Symbol;Acc:1595151]
Mt3	chr19	3752	3284	64.9123	68.3973	3.48506	1.05369	0.000214626	0.0851351	NotSig	-0.079242	negligible	926.866	798.766	1054.97	0.13609	2.96306	1.32074	0.00304594	0.0623103	Not Sig	nonsignificant	metallothionein 3 [Source:RGD Symbol;Acc:621252]
Atp5f1a	chr18	582	718	73.5286	85.6093	12.0807	1.1643	0.000224303	0.0854145	NotSig	-0.215722	small	176.198	180.182	172.214	0.148962	-0.423999	0.95578	0.671566	0.852905	Not Sig	nonsignificant	ATP synthase F1 subunit alpha [Source:RGD Symbol;Acc:619993]
Cd9	chr4	387	415	78.7326	94.5925	15.8599	1.20144	0.00023345	0.0854786	NotSig	-0.257659	small	108.756	104.945	112.566	0.168785	0.650825	1.07262	0.515159	0.758391	Not Sig	nonsignificant	CD9 molecule [Source:RGD Symbol;Acc:2318]
Actb	chr12	4123	5013	76.8379	80.7685	3.93059	1.05115	0.000256825	0.0905544	NotSig	-0.0720875	negligible	1146.96	1206.39	1087.53	0.117048	-1.26364	0.901472	0.206358	0.513136	Not Sig	nonsignificant	actin, beta [Source:RGD Symbol;Acc:628837]
Hbb	chr1	38465	28609	35.3109	35.9276	0.616673	1.01746	0.000315549	0.0996147	NotSig	-0.0183501	negligible	6174.65	5064.47	7284.83	0.591136	0.887387	1.43842	0.374871	0.653783	Not Sig	nonsignificant	hemoglobin subunit beta [Source:RGD Symbol;Acc:2783]
Calm1	chr6	766	1073	67.773	77.8985	10.1255	1.1494	0.000324376	0.0996147	NotSig	-0.153404	negligible	125.883	120.187	131.58	0.156321	0.808974	1.0948	0.41853	0.685204	Not Sig	nonsignificant	calmodulin 1 [Source:RGD Symbol;Acc:2257]
Gdi2	chr17	183	228	67.6649	88.1755	20.5106	1.30312	0.000348219	0.103595	NotSig	-0.389779	small	55.2846	57.0853	53.4838	0.221768	-0.490593	0.936911	0.623715	0.830334	Not Sig	nonsignificant	GDP dissociation inhibitor 2 [Source:RGD Symbol;Acc:61802]
Aldoa	chr1	1507	1963	96.8237	103.914	7.09008	1.07323	0.000517154	0.120297	NotSig	-0.114808	negligible	460.958	495.532	426.383	0.142154	-1.50822	0.860454	0.131499	0.396335	Not Sig	nonsignificant	aldolase, fructose-bisphosphate A [Source:RGD Symbol;Acc:2089]
Rpl18a	chr16	1251	1064	55.0604	60.4657	5.40525	1.09817	0.000563806	0.120297	NotSig	-0.124377	negligible	315.478	264.168	366.788	0.167286	2.83583	1.38847	0.00457068	0.0772914	Not Sig	nonsignificant	ribosomal protein L18A [Source:RGD Symbol;Acc:1302976]
Cox7a2l	chr6	302	286	65.3569	77.7251	12.3682	1.18924	0.000565376	0.120297	NotSig	-0.304366	small	69.2417	65.351	73.1324	0.200967	0.906931	1.11907	0.364443	0.648705	Not Sig	nonsignificant	cytochrome c oxidase subunit 7A2 like [Source:RGD Symbol;Acc:1306111]
Atp1b3	chr8	232	202	70.789	89.7866	18.9976	1.26837	0.000579213	0.120297	NotSig	-0.323901	small	51.4253	45.4802	57.3705	0.2175	1.47038	1.26144	0.141459	0.412173	Not Sig	nonsignificant	ATPase Na+/K+ transporting subunit beta 3 [Source:RGD Symbol;Acc:2172]
ND5	chrM	2381	1985	44.5083	46.431	1.92277	1.0432	0.000518034	0.120297	NotSig	-0.0472372	negligible	238.514	225.216	251.811	0.184546	0.839733	1.11809	0.401058	0.675872	Not Sig	nonsignificant	mitochondrially encoded NADH:ubiquinone oxidoreductase core subunit 5 [Source:RGD Symbol;Acc:620560]
Mfge8	chr1	343	385	61.7522	71.6875	9.93528	1.16089	0.000624369	0.123833	NotSig	-0.183528	negligible	91.6448	91.1868	92.1029	0.200372	0.127378	1.01005	0.898641	0.953092	Not Sig	nonsignificant	milk fat globule EGF and factor V/VIII domain containing [Source:RGD Symbol;Acc:3083]
Ckb	chr6	2420	2630	82.912	87.9897	5.0777	1.06124	0.000615117	0.123833	NotSig	-0.0944476	negligible	676.917	651.838	701.996	0.140123	0.757115	1.07695	0.448981	0.698648	Not Sig	nonsignificant	creatine kinase B [Source:RGD Symbol;Acc:2357]
Pin1	chr8	158	176	65.4904	82.6638	17.1734	1.26223	0.000685145	0.130131	NotSig	-0.318414	small	42.4606	41.8208	43.1004	0.232284	0.247928	1.0306	0.80419	0.910249	Not Sig	nonsignificant	peptidylprolyl cis/trans isomerase, NIMA-interacting 1 [Source:RGD Symbol;Acc:1310299]
Rpl10	chrX	693	611	53.6675	61.1528	7.48533	1.13948	0.000714001	0.130717	NotSig	-0.206907	small	159.581	141.114	178.047	0.177345	2.05971	1.26172	0.0394265	0.205784	Not Sig	nonsignificant	ribosomal protein L10 [Source:RGD Symbol;Acc:621178]
Ubb	chr10	2364	2773	70.739	75.4795	4.74045	1.06701	0.000787489	0.141451	NotSig	-0.0801425	negligible	608.846	622.046	595.645	0.148407	-0.416772	0.957557	0.676845	0.855065	Not Sig	nonsignificant	ubiquitin B [Source:RGD Symbol;Acc:621562]
Actg1	chr10	1435	1674	79.0667	85.2758	6.20919	1.07853	0.000824849	0.145418	NotSig	-0.111479	negligible	357.276	353.057	361.495	0.151504	0.254372	1.0239	0.799208	0.906559	Not Sig	nonsignificant	actin, gamma 1 [Source:RGD Symbol;Acc:1304556]
Ndufb9	chr7	746	639	57.5911	65.2722	7.68112	1.13337	0.000857825	0.148482	NotSig	-0.225722	small	184.912	152.133	217.691	0.156898	3.27515	1.43092	0.00105607	0.0338144	FDR<0.05	nonsignificant	NADH:ubiquinone oxidoreductase subunit B9 [Source:RGD Symbol;Acc:1307114]
Tuba1b	chr7	1196	1398	61.5998	67.6884	6.08868	1.09884	0.000879862	0.149576	NotSig	-0.122184	negligible	295.503	309.645	281.36	0.131679	-1.03541	0.908654	0.300476	0.607152	Not Sig	nonsignificant
Atp5me	chr14	562	518	54.6235	61.6227	6.99918	1.12814	0.000964649	0.161113	NotSig	-0.133959	negligible	90.0693	76.49	103.649	0.216857	2.06972	1.35506	0.038479	0.203694	Not Sig	nonsignificant	ATP synthase membrane subunit e [Source:RGD Symbol;Acc:621377]
Gpi	chr1	536	631	87.4657	100.269	12.803	1.14638	0.00100573	0.162001	NotSig	-0.162005	negligible	157.664	162.266	153.062	0.166988	-0.462601	0.943275	0.64365	0.84207	Not Sig	nonsignificant	glucose-6-phosphate isomerase [Source:RGD Symbol;Acc:2727]
Eif4g2	chr1	509	482	88.1306	101.144	13.0135	1.14766	0.00100675	0.162001	NotSig	-0.238766	small	68.4858	68.5822	68.3894	0.201005	-0.0725523	0.997189	0.942162	0.97405	Not Sig	nonsignificant	eukaryotic translation initiation factor 4, gamma 2 [Source:RGD Symbol;Acc:1305294]
Dlg4	chr10	442	614	76.5658	88.6451	12.0792	1.15776	0.00112633	0.170569	NotSig	-0.236866	small	97.97	111.167	84.7731	0.192285	-2.10461	0.762575	0.0353253	0.195698	Not Sig	nonsignificant	discs large MAGUK scaffold protein 4 [Source:RGD Symbol;Acc:68424]
Ywhag	chr12	517	701	108.967	122.849	13.8822	1.1274	0.00125149	0.185308	NotSig	-0.18779	negligible	133.589	143.591	123.588	0.159997	-1.44981	0.860695	0.147111	0.42231	Not Sig	nonsignificant	tyrosine 3-monooxygenase/tryptophan 5-monooxygenase activation protein, gamma [Source:RGD Symbol;Acc:62002]
Pea15	chr13	750	693	89.6262	97.01	7.38381	1.08238	0.0014929	0.207972	NotSig	-0.15295	negligible	125.891	121.689	130.092	0.170272	0.520795	1.06905	0.60251	0.816815	Not Sig	nonsignificant	proliferation and apoptosis adaptor protein 15 [Source:RGD Symbol;Acc:1306055]
Hspa8	chr8	1374	1810	63.4847	69.4652	5.98054	1.0942	0.00165122	0.221941	NotSig	-0.0982778	negligible	167.149	197.749	136.549	0.155	-3.40166	0.690516	0.00066977	0.0278792	FDR<0.05	nonsignificant	heat shock protein family A (Hsp70) member 8 [Source:RGD Symbol;Acc:621725]
Sulf2	chr3	206	227	73.6196	93.9892	20.3696	1.27669	0.0017338	0.224134	NotSig	-0.211021	small	50.2343	51.0851	49.3836	0.22244	-0.166748	0.966692	0.867568	0.939859	Not Sig	nonsignificant	sulfatase 2 [Source:RGD Symbol;Acc:1305078]
Cdc37	chr8	112	144	72.5506	92.0161	19.4654	1.2683	0.00174222	0.224134	NotSig	-0.342251	small	34.4844	38.0007	30.9682	0.287288	-0.78665	0.814938	0.431487	0.693909	Not Sig	nonsignificant	cell division cycle 37, HSP90 cochaperone [Source:RGD Symbol;Acc:71006]
Tubb4b	chr3	397	470	64.5312	75.147	10.6158	1.16451	0.00177179	0.224899	NotSig	-0.216269	small	109.157	112.915	105.399	0.163556	-0.689879	0.933436	0.490271	0.735406	Not Sig	nonsignificant	tubulin, beta 4B class IVb [Source:RGD Symbol;Acc:735101]
Zbtb18	chr13	276	427	88.2089	103.609	15.3997	1.17458	0.00196047	0.239278	NotSig	-0.237561	small	26.1367	38.7058	13.5675	0.328002	-4.61913	0.350529	3.85344e-06	0.00213866	FDR<0.05	downregulated	zinc finger and BTB domain containing 18 [Source:RGD Symbol;Acc:621548]
Gprc5b	chr1	308	350	82.6396	98.8526	16.2131	1.19619	0.0020453	0.246471	NotSig	-0.218382	small	40.016	40.1482	39.8837	0.240407	-0.184387	0.993413	0.85371	0.936381	Not Sig	nonsignificant	G protein-coupled receptor, class C, group 5, member B [Source:RGD Symbol;Acc:1309510]
Eid1	chr3	270	270	72.8667	86.8198	13.9531	1.19149	0.00231219	0.255954	NotSig	-0.256899	small	49.9462	50.1886	49.7037	0.219741	-0.0217752	0.990339	0.982627	0.992429	Not Sig	nonsignificant	EP300 interacting inhibitor of differentiation 1 [Source:RGD Symbol;Acc:1562702]
Rpl3	chr7	803	674	44.7944	50.721	5.92655	1.13231	0.00230179	0.255954	NotSig	-0.150142	negligible	199.787	171.106	228.469	0.167668	2.54339	1.33525	0.0109781	0.112221	Not Sig	nonsignificant	ribosomal protein L3 [Source:RGD Symbol;Acc:735105]
Nbl1	chr5	183	171	88.7724	106.148	17.3755	1.19573	0.00270758	0.283254	NotSig	-0.314369	small	34.0033	30.589	37.4176	0.26895	1.03784	1.22324	0.299343	0.606334	Not Sig	nonsignificant	NBL1, DAN family BMP antagonist [Source:RGD Symbol;Acc:3151]
Epn1	chr1	343	417	74.653	85.4627	10.8097	1.1448	0.00289873	0.293573	NotSig	-0.246666	small	98.6453	104.904	92.3861	0.171372	-0.92938	0.880669	0.352692	0.640399	Not Sig	nonsignificant	Epsin 1 [Source:RGD Symbol;Acc:619772]
Rplp2	chr1	1084	868	42.4658	46.297	3.83121	1.09022	0.00344292	0.294121	NotSig	-0.137666	negligible	199.397	163.448	235.345	0.212565	2.55962	1.43988	0.0104788	0.110839	Not Sig	nonsignificant	ribosomal protein lateral stalk subunit P2 [Source:RGD Symbol;Acc:621775]
Sparcl1	chr14	2354	2253	109.686	114.314	4.62809	1.04219	0.00328263	0.294121	NotSig	-0.0819672	negligible	633.778	562.143	705.414	0.124072	2.63746	1.25487	0.00835295	0.103119	Not Sig	nonsignificant	SPARC like 1 [Source:RGD Symbol;Acc:2531]
Akap11	chr15	188	196	68.9235	88.4108	19.4873	1.28274	0.00298833	0.294121	NotSig	-0.25	small	34.6284	36.5831	32.6736	0.27477	-0.669569	0.893134	0.503132	0.747021	Not Sig	nonsignificant	A-kinase anchoring protein 11 [Source:RGD Symbol;Acc:2079]
Cox6c	chr7	1163	1067	58.2413	63.5183	5.27695	1.09061	0.00302662	0.294121	NotSig	-0.124704	negligible	286.366	249.92	322.813	0.129694	2.84467	1.29167	0.00444578	0.0772914	Not Sig	nonsignificant	cytochrome c oxidase subunit 6C [Source:RGD Symbol;Acc:620616]
Atp5mg	chr8	657	567	63.0941	70.6547	7.56062	1.11983	0.00351324	0.294121	NotSig	-0.209326	small	156.848	129.723	183.972	0.163891	2.98396	1.41818	0.00284546	0.0599708	Not Sig	nonsignificant	ATP synthase membrane subunit g [Source:RGD Symbol;Acc:1303259]
Cox5a	chr8	378	395	66.1417	75.3771	9.23537	1.13963	0.00327823	0.294121	NotSig	-0.177272	negligible	101.405	93.6542	109.157	0.18935	1.25231	1.16553	0.210459	0.516834	Not Sig	nonsignificant	cytochrome c oxidase subunit 5A [Source:RGD Symbol;Acc:620607]
Oaz2	chr8	191	189	68.6931	84.7001	16.007	1.23302	0.00355293	0.294121	NotSig	-0.289796	small	36.6339	34.6339	38.6339	0.24921	0.730655	1.11549	0.46499	0.714214	Not Sig	nonsignificant	ornithine decarboxylase antizyme 2 [Source:RGD Symbol;Acc:1562933]
Cxcl12	chr4	127	146	92.4164	117.796	25.3791	1.27462	0.00364827	0.29941	NotSig	-0.299252	small	24.9701	27.8449	22.0952	0.291045	-1.0622	0.793511	0.288146	0.595896	Not Sig	nonsignificant	C-X-C motif chemokine ligand 12 [Source:RGD Symbol;Acc:3651]
Ap2s1	chr1	230	205	74.3922	88.2421	13.8499	1.18617	0.0039659	0.312028	NotSig	-0.280924	small	58.6029	51.2922	65.9136	0.218293	1.72423	1.28506	0.084667	0.312573	Not Sig	nonsignificant	adaptor related protein complex 2 subunit sigma 1 [Source:RGD Symbol;Acc:620188]
Faim2	chr7	597	607	82.8971	92.2189	9.32179	1.11245	0.00388697	0.312028	NotSig	-0.132199	negligible	140.543	134.625	146.46	0.1549	0.816076	1.08791	0.414456	0.683915	Not Sig	nonsignificant	Fas apoptotic inhibitory molecule 2 [Source:RGD Symbol;Acc:628744]
Ndufs2	chr13	284	292	71.3664	82.3103	10.9439	1.15335	0.00440174	0.332576	NotSig	-0.183868	negligible	78.3158	73.2103	83.4213	0.187317	1.02906	1.13947	0.303451	0.609294	Not Sig	nonsignificant	NADH:ubiquinone oxidoreductase core subunit S2 [Source:RGD Symbol;Acc:1307109]
Higd2a	chr17	119	148	67.1589	86.0948	18.9359	1.28196	0.0044012	0.332576	NotSig	-0.36147	small	35.5593	35.5092	35.6094	0.251147	0.132036	1.00282	0.894956	0.953025	Not Sig	nonsignificant	HIG1 hypoxia inducible domain family, member 2A [Source:RGD Symbol;Acc:1309691]
Mmd	chr10	265	347	90.9609	104.493	13.5325	1.14877	0.00483176	0.345152	NotSig	-0.230243	small	50.3314	56.6205	44.0423	0.224775	-1.79256	0.77785	0.0730434	0.286616	Not Sig	nonsignificant	monocyte to macrophage differentiation-associated [Source:RGD Symbol;Acc:1592079]
Psmc5	chr10	241	211	47.3413	56.0615	8.72014	1.1842	0.00481565	0.345152	NotSig	-0.241157	small	63.4357	54.1896	72.6819	0.237774	1.84247	1.34125	0.0654063	0.269558	Not Sig	nonsignificant	proteasome 26S subunit, ATPase 5 [Source:RGD Symbol;Acc:708376]
Prdx2	chr19	529	509	75.6134	84.0325	8.41906	1.11134	0.00473978	0.345152	NotSig	-0.151844	negligible	139.048	123.844	154.251	0.178552	1.76308	1.24553	0.0778878	0.294258	Not Sig	nonsignificant	peroxiredoxin 2 [Source:RGD Symbol;Acc:3838]
Eef2	chr7	1694	1716	71.6892	75.8134	4.12417	1.05753	0.00493074	0.345152	NotSig	-0.075232	negligible	440.08	416.747	463.412	0.131864	1.17356	1.11197	0.24057	0.560739	Not Sig	nonsignificant	eukaryotic translation elongation factor 2 [Source:RGD Symbol;Acc:61979]
Arf3	chr7	816	1008	86.0254	94.7398	8.71438	1.1013	0.004707	0.345152	NotSig	-0.108501	negligible	111.258	138.25	84.2668	0.173008	-4.02508	0.609526	5.69561e-05	0.00725817	FDR<0.05	nonsignificant	ADP-ribosylation factor 3 [Source:RGD Symbol;Acc:621273]
Tpm1	chr8	109	110	67.8305	98.5134	30.6828	1.45235	0.00463268	0.345152	NotSig	-0.357405	small	27.2761	23.3174	31.2348	0.283045	1.36349	1.33955	0.172727	0.46419	Not Sig	nonsignificant	tropomyosin 1 [Source:RGD Symbol;Acc:3898]
Rps2	chr10	2681	2297	53.1488	55.7753	2.62647	1.04942	0.00537503	0.360146	NotSig	-0.0618263	negligible	329.367	286.988	371.746	0.190689	1.99931	1.29533	0.0455749	0.219368	Not Sig	nonsignificant	ribosomal protein S2 [Source:RGD Symbol;Acc:619887]
Cox6a1	chr12	1949	1764	67.6338	71.5275	3.89375	1.05757	0.00551954	0.360146	NotSig	-0.0969086	negligible	490.95	430.705	551.195	0.137091	2.61297	1.27975	0.00897599	0.10675	Not Sig	nonsignificant	cytochrome c oxidase subunit 6A1 [Source:RGD Symbol;Acc:2384]
Plppr4	chr2	425	557	80.0914	92.3946	12.3032	1.15361	0.00552324	0.360146	NotSig	-0.17249	negligible	32.2107	46.0653	18.356	0.351931	-3.76044	0.398478	0.000169616	0.0156895	FDR<0.05	downregulated	phospholipid phosphatase related 4 [Source:RGD Symbol;Acc:727806]
Hbb-bs	chr1	5275	3960	33.7847	34.8595	1.07481	1.03181	0.00586072	0.363001	NotSig	-0.0377769	negligible	1305.09	1072.79	1537.39	0.484009	1.07411	1.43307	0.282771	0.593691	Not Sig	nonsignificant
Bin1	chr18	298	357	83.207	101.321	18.1142	1.2177	0.00564835	0.363001	NotSig	-0.152021	negligible	78.8849	72.958	84.8117	0.198549	0.926573	1.16247	0.354148	0.640695	Not Sig	nonsignificant	bridging integrator 1 [Source:RGD Symbol;Acc:621786]
Selenot	chr2	297	346	91.9821	107.453	15.4711	1.1682	0.00592411	0.363001	NotSig	-0.199439	negligible	42.8924	51.6445	34.1403	0.235353	-2.50951	0.661063	0.0120899	0.112777	Not Sig	nonsignificant	selenoprotein T [Source:RGD Symbol;Acc:1359128]
Atp5mc3	chr3	441	404	64.048	72.5619	8.51396	1.13293	0.00592831	0.363001	NotSig	-0.169807	negligible	115.888	99.9368	131.838	0.164532	2.32875	1.31922	0.0198725	0.149043	Not Sig	nonsignificant	ATP synthase membrane subunit c locus 3 [Source:RGD Symbol;Acc:620052]
Abhd12	chr3	285	313	86.5033	99.6955	13.1922	1.15251	0.00594499	0.363001	NotSig	-0.17637	negligible	78.805	74.404	83.2059	0.191919	0.714384	1.1183	0.47499	0.725558	Not Sig	nonsignificant	abhydrolase domain containing 12, lysophospholipase [Source:RGD Symbol;Acc:1562570]
Araf	chrX	108	107	77.2211	104.647	27.4262	1.35516	0.00608676	0.36444	NotSig	-0.409408	small	26.1962	25.3758	27.0165	0.315969	0.285845	1.06466	0.774997	0.896501	Not Sig	nonsignificant	A-Raf proto-oncogene, serine/threonine kinase [Source:RGD Symbol;Acc:2148]
Cotl1	chr19	109	154	67.9844	86.5632	18.5787	1.27328	0.00625248	0.369712	NotSig	-0.278416	small	29.565	33.1492	25.9808	0.275419	-1.28948	0.783754	0.197231	0.499831	Not Sig	nonsignificant	coactosin-like F-actin binding protein 1 [Source:RGD Symbol;Acc:1305498]
Tpt1	chr15	2439	2018	46.1022	48.5893	2.48713	1.05395	0.00640445	0.374051	NotSig	-0.0668114	negligible	555.894	466.237	645.552	0.166292	2.86772	1.3846	0.00413447	0.0756471	Not Sig	nonsignificant	tumor protein, translationally-controlled 1 [Source:RGD Symbol;Acc:621623]
Atp6v1f	chr4	217	239	58.892	70.2346	11.3427	1.1926	0.0065842	0.37771	NotSig	-0.255751	small	61.0857	58.9828	63.1887	0.208864	0.653607	1.07131	0.513365	0.756418	Not Sig	nonsignificant
Smim7	chr16	115	117	71.8201	92.0071	20.187	1.28108	0.00703609	0.395332	NotSig	-0.342998	small	26.7518	24.6956	28.808	0.285903	0.710828	1.16653	0.477191	0.726919	Not Sig	nonsignificant	small integral membrane protein 7 [Source:RGD Symbol;Acc:1588793]
Polr2m	chr8	163	153	75.9725	91.0402	15.0677	1.19833	0.00703494	0.395332	NotSig	-0.352503	small	36.3597	34.8629	37.8565	0.257015	0.446116	1.08587	0.655514	0.846472	Not Sig	nonsignificant	RNA polymerase II subunit M [Source:RGD Symbol;Acc:619847]
ND3	chrM	3608	1731	46.8677	48.4466	1.57895	1.03369	0.00705196	0.395332	NotSig	-0.0575892	negligible	976.136	612.843	1339.43	0.552081	2.0453	2.1856	0.0408255	0.21039	Not Sig	nonsignificant
Hint1	chr10	484	466	60.8261	68.1397	7.31364	1.12024	0.00727436	0.402598	NotSig	-0.142533	negligible	109.3	101.802	116.798	0.162289	1.24286	1.14731	0.213919	0.521487	Not Sig	nonsignificant
Adgrb2	chr5	453	531	92.5951	82.901	-9.69409	0.895307	0.007481	0.402598	NotSig	0.157599	negligible	122.571	122.639	122.502	0.162974	-0.106928	0.99888	0.914846	0.95981	Not Sig	nonsignificant	adhesion G protein-coupled receptor B2 [Source:RGD Symbol;Acc:1309431]
Oaz1	chr7	602	618	65.606	73.2177	7.61171	1.11602	0.00741418	0.402598	NotSig	-0.105869	negligible	170.85	162.768	178.932	0.169358	0.967173	1.09931	0.333457	0.628062	Not Sig	nonsignificant	ornithine decarboxylase antizyme 1 [Source:RGD Symbol;Acc:3219]
Grina	chr7	782	857	75.2613	83.4656	8.20429	1.10901	0.00741693	0.402598	NotSig	-0.10737	negligible	211.449	208.276	214.622	0.135324	0.349152	1.03047	0.726976	0.877094	Not Sig	nonsignificant	glutamate ionotropic receptor NMDA type subunit associated protein 1 [Source:RGD Symbol;Acc:628873]
Ppp2r1a	chr1	370	534	83.0912	91.7036	8.61244	1.10365	0.00770818	0.403197	NotSig	-0.146233	negligible	122.481	135.348	109.615	0.175682	-1.72044	0.809875	0.0853526	0.313054	Not Sig	nonsignificant	protein phosphatase 2 scaffold subunit A alpha [Source:RGD Symbol;Acc:620907]
Uqcrq	chr10	655	584	65.2402	71.7089	6.46876	1.09915	0.00769638	0.403197	NotSig	-0.137101	negligible	166.538	145.048	188.029	0.160317	2.40526	1.29633	0.016161	0.132038	Not Sig	nonsignificant	ubiquinol-cytochrome c reductase, complex III subunit VII [Source:RGD Symbol;Acc:1562350]
Kidins220	chr6	235	259	82.8318	100.428	17.5964	1.21244	0.00765751	0.403197	NotSig	-0.207702	small	29.8863	33.3603	26.4123	0.273978	-1.29725	0.791729	0.194544	0.498099	Not Sig	nonsignificant	kinase D-interacting substrate 220 [Source:RGD Symbol;Acc:619949]
Micos13	chr9	317	263	68.8129	78.1448	9.33194	1.13561	0.00776191	0.403789	NotSig	-0.219109	small	74.5679	62.6192	86.5165	0.213569	2.26327	1.38163	0.023619	0.155468	Not Sig	nonsignificant	mitochondrial contact site and cristae organizing system subunit 13 [Source:RGD Symbol;Acc:1588578]
Apoe	chr1	11197	10214	67.9449	69.6093	1.66433	1.0245	0.00787043	0.407209	NotSig	-0.0315264	negligible	2679.88	2357.47	3002.29	0.132132	2.6352	1.27353	0.0084087	0.103119	Not Sig	nonsignificant	apolipoprotein E [Source:RGD Symbol;Acc:2138]
Dynll1	chr12	655	703	70.2666	77.7543	7.48775	1.10656	0.00812548	0.41146	NotSig	-0.0942242	negligible	177.472	166.088	188.857	0.152819	1.12917	1.13709	0.258824	0.574031	Not Sig	nonsignificant	dynein light chain LC8-type 1 [Source:RGD Symbol;Acc:619866]
Pllp	chr19	247	247	74.0923	88.1191	14.0269	1.18932	0.00811366	0.41146	NotSig	-0.25457	small	60.4873	56.5447	64.4299	0.201185	0.960053	1.13945	0.337029	0.629264	Not Sig	nonsignificant	plasmolipin [Source:RGD Symbol;Acc:621478]
Atp5pf	chr11	356	365	60.7851	69.8268	9.04172	1.14875	0.00835098	0.414069	NotSig	-0.195335	negligible	95.0444	88.5818	101.507	0.190266	1.07979	1.14591	0.280234	0.590915	Not Sig	nonsignificant	ATP synthase peripheral stalk subunit F6 [Source:RGD Symbol;Acc:621376]
Naa38	chr10	186	201	58.4578	69.9057	11.448	1.19583	0.00846827	0.415556	NotSig	-0.303165	small	48.6572	46.1258	51.1885	0.221979	0.80934	1.10976	0.41832	0.685204	Not Sig	nonsignificant	N(alpha)-acetyltransferase 38, NatC auxiliary subunit [Source:RGD Symbol;Acc:1559617]
Gnao1	chr19	409	479	76.8855	90.4347	13.5492	1.17623	0.00877742	0.422026	NotSig	-0.165238	negligible	35.2644	41.2026	29.3263	0.529561	-0.936404	0.711758	0.349065	0.639377	Not Sig	nonsignificant	G protein subunit alpha o1 [Source:RGD Symbol;Acc:628732]
Rpsa	chr8	1870	1555	61.3579	64.7098	3.35198	1.05463	0.00910983	0.427433	NotSig	-0.0837274	negligible	458.963	388.003	529.924	0.176912	2.56657	1.36577	0.0102709	0.11065	Not Sig	nonsignificant	ribosomal protein SA [Source:RGD Symbol;Acc:71026]
Enpp5	chr9	261	282	97.703	112.904	15.201	1.15558	0.00914787	0.427433	NotSig	-0.204817	small	35.989	37.4795	34.4985	0.274814	-0.529052	0.920461	0.59677	0.815865	Not Sig	nonsignificant	ectonucleotide pyrophosphatase/phosphodiesterase family member 5 [Source:RGD Symbol;Acc:1359199]
Fxyd7	chr1	140	143	89.3997	111.331	21.9311	1.24532	0.00938583	0.429582	NotSig	-0.261221	small	36.289	32.4351	40.1429	0.257816	1.07948	1.23764	0.280374	0.590915	Not Sig	nonsignificant	FXYD domain-containing ion transport regulator 7 [Source:RGD Symbol;Acc:620830]
Pebp1	chr12	1248	1323	71.9219	77.0275	5.10565	1.07099	0.00964788	0.43281	NotSig	-0.103203	negligible	318.01	299.956	336.064	0.120047	1.32056	1.12038	0.186649	0.484876	Not Sig	nonsignificant	phosphatidylethanolamine binding protein 1 [Source:RGD Symbol;Acc:62017]
Elob	chr10	449	417	59.7886	66.9103	7.12171	1.11911	0.010126	0.439527	NotSig	-0.17763	negligible	110.696	99.2465	122.145	0.16807	1.82055	1.23072	0.0686755	0.276102	Not Sig	nonsignificant	elongin B [Source:RGD Symbol;Acc:621200]
Rnf187	chr10	469	478	88.2244	97.6483	9.42385	1.10682	0.0105364	0.439527	NotSig	-0.161104	negligible	108.073	106.604	109.542	0.176941	0.310404	1.02755	0.756254	0.891758	Not Sig	nonsignificant	ring finger protein 187 [Source:RGD Symbol;Acc:1308636]
Thra	chr10	456	462	99.2089	112.158	12.9491	1.13052	0.0100806	0.439527	NotSig	-0.185714	negligible	98.2468	92.2199	104.274	0.176534	0.863596	1.13071	0.38781	0.661708	Not Sig	nonsignificant	thyroid hormone receptor alpha [Source:RGD Symbol;Acc:3857]
Actr3	chr13	120	180	62.1723	79.7634	17.5911	1.28294	0.0110232	0.439527	NotSig	-0.260549	small	35.4979	38.1094	32.8863	0.278857	-0.765301	0.862945	0.444093	0.698648	Not Sig	nonsignificant	actin related protein 3 [Source:RGD Symbol;Acc:71024]
Mdh1	chr14	514	646	88.9787	99.5152	10.5365	1.11842	0.0105637	0.439527	NotSig	-0.161219	negligible	116.588	128.745	104.43	0.160907	-1.7833	0.811143	0.0745374	0.286616	Not Sig	nonsignificant	malate dehydrogenase 1 [Source:RGD Symbol;Acc:3072]
Ndufc1	chr2	138	152	54.4619	70.0431	15.5812	1.28609	0.0109069	0.439527	NotSig	-0.289855	small	34.4589	31.0101	37.9077	0.263611	0.951603	1.22243	0.341298	0.631862	Not Sig	nonsignificant	NADH:ubiquinone oxidoreductase subunit C1 [Source:RGD Symbol;Acc:1586362]
Ank2	chr2	587	553	92.8303	105.877	13.0472	1.14055	0.0108934	0.439527	NotSig	-0.162518	negligible	48.3772	56.1477	40.6067	0.251529	-1.88147	0.723213	0.0599083	0.258413	Not Sig	nonsignificant	ankyrin 2 [Source:RGD Symbol;Acc:620156]
LOC100361457	chr3	322	357	60.0042	67.9854	7.98122	1.13301	0.010297	0.439527	NotSig	-0.140081	negligible	108.82	118.703	98.9378	0.185647	-1.53609	0.833492	0.124517	0.383387	Not Sig	nonsignificant	actin, gamma 1 propeptide-like [Source:RGD Symbol;Acc:2320108]
Ncald	chr7	291	284	68.5307	80.201	11.6703	1.17029	0.0103641	0.439527	NotSig	-0.185741	negligible	40.1873	41.3582	39.0164	0.255331	-0.425587	0.943378	0.670409	0.852237	Not Sig	nonsignificant	neurocalcin delta [Source:RGD Symbol;Acc:1560287]
Smarca4	chr8	105	127	100.204	76.7732	-23.4307	0.76617	0.0100359	0.439527	NotSig	0.327085	small	29.9923	30.9711	29.0135	0.307786	-0.171172	0.936794	0.864088	0.938941	Not Sig	nonsignificant	SWI/SNF related, matrix associated, actin dependent regulator of chromatin, subfamily a, member 4 [Source:RGD Symbol;Acc:621728]
Eef1a1	chr8	2707	2736	61.9525	64.7377	2.78524	1.04496	0.0100298	0.439527	NotSig	-0.0526024	negligible	533.828	485.641	582.015	0.157582	1.68193	1.19845	0.0925824	0.32938	Not Sig	nonsignificant	eukaryotic translation elongation factor 1 alpha 1 [Source:RGD Symbol;Acc:67387]
Ncl	chr9	198	196	59.3357	71.9736	12.6379	1.21299	0.0101718	0.439527	NotSig	-0.231892	small	45.5274	41.3682	49.6865	0.246026	0.96311	1.20108	0.335492	0.628825	Not Sig	nonsignificant	nucleolin [Source:RGD Symbol;Acc:3153]
Tspan7	chrX	1661	1680	94.2361	98.8248	4.58867	1.04869	0.011219	0.439527	NotSig	-0.0597393	negligible	406.867	387.516	426.218	0.123955	1.15245	1.09987	0.249136	0.568516	Not Sig	nonsignificant	tetraspanin 7 [Source:RGD Symbol;Acc:1589725]
Prkcb	chr1	194	188	89.0313	106.985	17.9535	1.20165	0.0115911	0.44124	NotSig	-0.263984	small	27.477	22.9927	31.9613	0.303694	1.44146	1.39006	0.149454	0.423919	Not Sig	nonsignificant	protein kinase C, beta [Source:RGD Symbol;Acc:3396]
LOC100362027	chr10	851	845	43.1634	46.9906	3.82728	1.08867	0.0116079	0.44124	NotSig	-0.1357	negligible	227.655	207.789	247.521	0.166019	1.54473	1.19121	0.122412	0.378839	Not Sig	nonsignificant
Hmgcr	chr2	134	143	91.0861	111.161	20.0753	1.2204	0.0116335	0.44124	NotSig	-0.327763	small	25.1624	25.2101	25.1147	0.295965	0.00244899	0.996216	0.998046	0.999246	Not Sig	nonsignificant	3-hydroxy-3-methylglutaryl-CoA reductase [Source:RGD Symbol;Acc:2803]
Ptn	chr4	1006	1071	97.0752	104.783	7.70807	1.0794	0.0115938	0.44124	NotSig	-0.0847816	negligible	251.105	237.364	264.846	0.145539	1.00981	1.11578	0.312588	0.611536	Not Sig	nonsignificant	pleiotrophin [Source:RGD Symbol;Acc:3444]
Cox8a	chr1	1621	1323	81.1777	86.1497	4.972	1.06125	0.0117242	0.441615	NotSig	-0.115368	negligible	417.167	353.608	480.727	0.157025	2.91973	1.35949	0.00350335	0.0670469	Not Sig	nonsignificant
Ywhaq	chr6	424	448	69.1823	79.2789	10.0966	1.14594	0.0117362	0.441615	NotSig	-0.148535	negligible	90.3109	83.7061	96.9157	0.171777	1.23001	1.15781	0.218693	0.528482	Not Sig	nonsignificant	tyrosine 3-monooxygenase/tryptophan 5-monooxygenase activation protein, theta [Source:RGD Symbol;Acc:3979]
Pon2	chr4	151	132	96.1719	109.576	13.4038	1.13937	0.0119172	0.441771	NotSig	-0.25898	small	36.7196	30.5767	42.8625	0.260258	1.77336	1.4018	0.0761691	0.289842	Not Sig	nonsignificant	paraoxonase 2 [Source:RGD Symbol;Acc:1309954]
Vcp	chr5	227	318	72.2989	86.3492	14.0503	1.19434	0.0119097	0.441771	NotSig	-0.25267	small	58.5243	66.4683	50.5803	0.238184	-1.63372	0.760969	0.102317	0.349073	Not Sig	nonsignificant	valosin-containing protein [Source:RGD Symbol;Acc:621595]
Arsb	chr2	146	182	92.0671	111.779	19.7124	1.21411	0.0121648	0.448872	NotSig	-0.291465	small	30.5923	32.1289	29.0556	0.282187	-0.477151	0.904344	0.633255	0.832835	Not Sig	nonsignificant	arylsulfatase B [Source:RGD Symbol;Acc:2158]
Ndfip1	chr18	593	744	88.0536	97.8198	9.76618	1.11091	0.0123601	0.4507	NotSig	-0.108143	negligible	161.131	162.668	159.595	0.167424	-0.30556	0.981107	0.75994	0.894227	Not Sig	nonsignificant	Nedd4 family interacting protein 1 [Source:RGD Symbol;Acc:1310053]
Gng3	chr1	177	209	72.5393	83.7934	11.254	1.15514	0.013111	0.468666	NotSig	-0.264138	small	41.0822	41.7706	40.3939	0.259957	-0.254258	0.96704	0.799296	0.906559	Not Sig	nonsignificant	G protein subunit gamma 3 [Source:RGD Symbol;Acc:620805]
Nme2	chr10	450	428	70.8719	76.8363	5.96448	1.08416	0.0131936	0.468666	NotSig	-0.147564	negligible	114.588	101.722	127.455	0.168712	1.99801	1.25298	0.0457153	0.219368	Not Sig	nonsignificant	NME/NM23 nucleoside diphosphate kinase 2 [Source:RGD Symbol;Acc:619877]
Cldn11	chr2	1190	1399	82.9932	88.433	5.43985	1.06555	0.0132805	0.469177	NotSig	-0.0904876	negligible	228.678	235.588	221.768	0.203012	-0.460958	0.941338	0.644828	0.84207	Not Sig	nonsignificant	claudin 11 [Source:RGD Symbol;Acc:71081]
Ttyh1	chr1	1293	1279	100.152	106.589	6.43729	1.06428	0.0135551	0.469232	NotSig	-0.0857711	negligible	261.644	251.644	271.643	0.125083	0.880659	1.07947	0.378503	0.655782	Not Sig	nonsignificant	tweety family member 1 [Source:RGD Symbol;Acc:1310103]
Tmem38a	chr16	193	192	86.0064	72.7813	-13.2251	0.846231	0.0142935	0.469232	NotSig	0.24145	small	39.024	39.5007	38.5474	0.244904	-0.179048	0.975867	0.8579	0.938866	Not Sig	nonsignificant	transmembrane protein 38a [Source:RGD Symbol;Acc:1307901]
Rpl35	chr3	1586	1292	50.5499	53.7371	3.18712	1.06305	0.0141888	0.469232	NotSig	-0.11293	negligible	383.241	321.934	444.547	0.168223	2.82045	1.38087	0.00479559	0.0776147	Not Sig	nonsignificant	ribosomal protein L35 [Source:RGD Symbol;Acc:1303007]
Rsrp1	chr5	132	134	226.758	243.15	16.3923	1.07229	0.0141881	0.469232	NotSig	-0.222619	small	35.6284	34.2173	37.0395	0.260166	0.496265	1.08248	0.619708	0.8281	Not Sig	nonsignificant	arginine and serine rich protein 1 [Source:RGD Symbol;Acc:1359529]
Acot7	chr5	154	218	91.6498	105.142	13.492	1.14721	0.0137761	0.469232	NotSig	-0.256308	small	49.5422	52.1742	46.9103	0.222869	-0.736043	0.899109	0.461704	0.711794	Not Sig	nonsignificant	acyl-CoA thioesterase 7 [Source:RGD Symbol;Acc:628856]
Gabarap	chr10	277	319	67.6509	75.2964	7.64547	1.11301	0.0144975	0.469442	NotSig	-0.197907	negligible	79.8947	78.3121	81.4772	0.193946	0.363181	1.04042	0.71647	0.872517	Not Sig	nonsignificant	GABA type A receptor-associated protein [Source:RGD Symbol;Acc:61911]
Syne1	chr1	138	170	100.298	128.797	28.4985	1.28414	0.0146568	0.472214	NotSig	-0.262011	small	25.6554	29.1614	22.1494	0.356145	-1.06712	0.759544	0.285918	0.595228	Not Sig	nonsignificant	spectrin repeat containing nuclear envelope protein 1 [Source:RGD Symbol;Acc:620546]
Nsg1	chr14	379	441	89.7053	101.554	11.8487	1.13209	0.0154357	0.484975	NotSig	-0.155808	negligible	69.2986	74.0594	64.5377	0.401979	-0.482345	0.871431	0.629561	0.83162	Not Sig	nonsignificant	neuronal vesicle trafficking associated 1 [Source:RGD Symbol;Acc:2222]
Eif4h	chr12	323	388	72.4426	81.5317	9.08912	1.12547	0.0160831	0.487142	NotSig	-0.141739	negligible	74.3634	78.1787	70.5481	0.187508	-0.79499	0.902395	0.426619	0.693673	Not Sig	nonsignificant	eukaryotic translation initiation factor 4H [Source:RGD Symbol;Acc:1359222]
Uqcrfs1	chr17	165	178	71.7816	86.5146	14.733	1.20525	0.0161336	0.487142	NotSig	-0.285015	small	42.6502	41.0494	44.2511	0.246386	0.435738	1.078	0.663027	0.847283	Not Sig	nonsignificant	ubiquinol-cytochrome c reductase, Rieske iron-sulfur polypeptide 1 [Source:RGD Symbol;Acc:628838]
Iqsec1	chr4	182	220	75.1342	88.0314	12.8971	1.17165	0.0159922	0.487142	NotSig	-0.214866	small	27.0778	29.0087	25.147	0.292323	-0.824834	0.866877	0.409466	0.682359	Not Sig	nonsignificant	IQ motif and Sec7 domain ArfGEF 1 [Source:RGD Symbol;Acc:1596313]
Atp6v1e1	chr4	250	317	90.868	103.733	12.8654	1.14158	0.0165619	0.493973	NotSig	-0.170808	negligible	73.2754	77.714	68.8368	0.208383	-0.853683	0.885771	0.393281	0.666215	Not Sig	nonsignificant	ATPase H+ transporting V1 subunit E1 [Source:RGD Symbol;Acc:735157]
Tmem151a	chr1	486	541	89.1408	99.8393	10.6985	1.12002	0.016676	0.494151	NotSig	-0.127879	negligible	73.1748	77.6292	68.7204	0.200966	-0.904561	0.885239	0.365698	0.648705	Not Sig	nonsignificant	transmembrane protein 151A [Source:RGD Symbol;Acc:1310680]
LOC685085	chr4	632	569	45.5936	50.1359	4.54231	1.09963	0.0168326	0.496119	NotSig	-0.138422	negligible	194.278	167.202	221.355	0.161665	2.52216	1.32388	0.0116635	0.112221	Not Sig	nonsignificant	similar to 40S ribosomal protein S25 [Source:RGD Symbol;Acc:1583218]
Ptges3	chr7	160	201	66.3232	79.3498	13.0266	1.19641	0.016893	0.496361	NotSig	-0.310784	small	45.5823	49.3328	41.8318	0.241769	-0.926084	0.847952	0.354402	0.640695	Not Sig	nonsignificant	prostaglandin E synthase 3 [Source:RGD Symbol;Acc:1561913]
Sf3b2	chr1	124	115	73.2974	91.4963	18.1989	1.24829	0.0171785	0.49957	NotSig	-0.290035	small	33.4645	30.8436	36.0854	0.256292	0.864078	1.16995	0.387545	0.661708	Not Sig	nonsignificant	splicing factor 3b, subunit 2 [Source:RGD Symbol;Acc:1307159]
Btbd1	chr1	276	224	71.2477	81.8039	10.5562	1.14816	0.0174616	0.505273	NotSig	-0.19761	negligible	49.9576	43.8657	56.0494	0.223415	1.47705	1.27775	0.139661	0.411711	Not Sig	nonsignificant	BTB domain containing 1 [Source:RGD Symbol;Acc:1310962]
Ndufv2	chr9	135	139	54.5425	68.4643	13.9218	1.25525	0.0176843	0.508623	NotSig	-0.228421	small	36.3346	32.7812	39.888	0.248924	1.15633	1.2168	0.247547	0.568516	Not Sig	nonsignificant	NADH:ubiquinone oxidoreductase core subunit V2 [Source:RGD Symbol;Acc:621733]
Rpl26	chr10	1513	1203	48.1501	50.5641	2.41405	1.05014	0.0178738	0.509457	NotSig	-0.0596771	negligible	95.8365	72.8957	118.777	0.209366	3.44712	1.62941	0.000566597	0.0248259	FDR<0.05	nonsignificant	ribosomal protein L26 [Source:RGD Symbol;Acc:1310607]
Nono	chrX	126	138	68.7534	90.785	22.0316	1.32044	0.0178701	0.509457	NotSig	-0.254552	small	29.1612	30.0853	28.2371	0.290234	-0.282704	0.938569	0.777403	0.896659	Not Sig	nonsignificant	non-POU domain containing, octamer-binding [Source:RGD Symbol;Acc:1549738]
Ywhae	chr10	869	964	69.6934	76.0131	6.31968	1.09068	0.0181249	0.511323	NotSig	-0.0944041	negligible	212.715	213.806	211.624	0.132217	-0.0506867	0.989797	0.959575	0.981987	Not Sig	nonsignificant	tyrosine 3-monooxygenase/tryptophan 5-monooxygenase activation protein, epsilon [Source:RGD Symbol;Acc:62000]
Ncdn	chr5	926	1400	168.848	178.761	9.9139	1.05872	0.0186375	0.511323	NotSig	-0.0956976	negligible	186.133	229.251	143.015	0.149859	-4.44354	0.623836	8.84891e-06	0.00274383	FDR<0.05	nonsignificant	neurochondrin [Source:RGD Symbol;Acc:621734]
Eif3h	chr7	187	206	56.6834	65.7127	9.02931	1.15929	0.0183611	0.511323	NotSig	-0.129373	negligible	52.7415	51.9264	53.5565	0.216872	0.190628	1.03139	0.848817	0.932424	Not Sig	nonsignificant	eukaryotic translation initiation factor 3, subunit H [Source:RGD Symbol;Acc:735178]
Ywhaz	chr7	624	870	90.6884	97.3992	6.71082	1.074	0.0187057	0.511719	NotSig	-0.107963	negligible	126.674	143.611	109.736	0.168316	-2.34966	0.764122	0.0187904	0.143547	Not Sig	nonsignificant	tyrosine 3-monooxygenase/tryptophan 5-monooxygenase activation protein, zeta [Source:RGD Symbol;Acc:3980]
Atp5mc1	chr10	312	344	63.3807	71.7095	8.32881	1.13141	0.0188226	0.512924	NotSig	-0.121687	negligible	84.693	81.578	87.8079	0.195025	0.511935	1.07637	0.608697	0.819812	Not Sig	nonsignificant	ATP synthase membrane subunit c locus 1 [Source:RGD Symbol;Acc:61933]
LOC691807	chr2	223	214	76.6601	88.896	12.236	1.15961	0.0191354	0.512924	NotSig	-0.152037	negligible	55.6668	45.7452	65.5884	0.228318	2.1042	1.43378	0.0353612	0.195698	Not Sig	nonsignificant
ND4L	chrM	209	139	48.3712	55.4472	7.07604	1.14629	0.0190838	0.512924	NotSig	-0.269409	small	28.4265	20.2065	36.6466	0.328424	2.72847	1.8136	0.00636283	0.0929308	Not Sig	nonsignificant
Ppial4d	chr14	875	1034	63.5313	68.3144	4.78309	1.07529	0.0196943	0.515831	NotSig	-0.104101	negligible	310.323	312.5	308.145	0.123416	-0.147724	0.986062	0.882561	0.944385	Not Sig	nonsignificant	peptidylprolyl isomerase A (cyclophilin A)-like 4D [Source:RGD Symbol;Acc:2321083]
LOC100360449	chr3	844	693	47.9222	51.5683	3.64605	1.07608	0.0200819	0.523612	NotSig	-0.114287	negligible	214.363	182.253	246.473	0.187194	2.37224	1.35237	0.0176807	0.139518	Not Sig	nonsignificant
Rasl10b	chr10	345	576	57.6562	63.8713	6.21515	1.1078	0.0221281	0.524864	NotSig	-0.125443	negligible	56.9992	71.3366	42.6618	0.230494	-3.23086	0.598035	0.00123419	0.0373622	FDR<0.05	nonsignificant	RAS-like, family 10, member B [Source:RGD Symbol;Acc:1310873]
Rpl24	chr11	735	616	47.6507	52.3745	4.72385	1.09914	0.0211161	0.524864	NotSig	-0.156434	negligible	170.998	145.301	196.695	0.197067	2.29426	1.35371	0.0217755	0.155352	Not Sig	nonsignificant	ribosomal protein L24 [Source:RGD Symbol;Acc:621191]
Degs1	chr13	111	140	87.2793	75.2822	-11.9971	0.862543	0.0215308	0.524864	NotSig	0.321467	small	32.895	33.2238	32.5662	0.262613	-0.151334	0.980208	0.879712	0.942724	Not Sig	nonsignificant	delta(4)-desaturase, sphingolipid 1 [Source:RGD Symbol;Acc:70917]
Igfbp7	chr14	312	294	87.0189	98.1312	11.1123	1.1277	0.0212418	0.524864	NotSig	-0.186586	negligible	81.8159	69.5088	94.1231	0.187422	2.14485	1.35412	0.0319649	0.186089	Not Sig	nonsignificant	insulin-like growth factor binding protein 7 [Source:RGD Symbol;Acc:1306201]
Rps24	chr16	1019	804	41.1394	44.2561	3.11668	1.07576	0.0216439	0.524864	NotSig	-0.0774564	negligible	158.06	132.326	183.794	0.194431	2.5214	1.38895	0.0116889	0.112221	Not Sig	nonsignificant	ribosomal protein S24 [Source:RGD Symbol;Acc:621040]
Cox7c	chr2	1116	1014	54.6345	59.0929	4.4584	1.0816	0.0217397	0.524864	NotSig	-0.121084	negligible	271.979	234.63	309.328	0.140687	2.8534	1.31836	0.00432539	0.0772914	Not Sig	nonsignificant	cytochrome c oxidase subunit 7C [Source:RGD Symbol;Acc:2300145]
Cct5	chr2	188	201	67.5965	79.8827	12.2862	1.18176	0.0223984	0.524864	NotSig	-0.274923	small	52.6911	48.3456	57.0365	0.221251	1.14669	1.17977	0.251508	0.568516	Not Sig	nonsignificant	chaperonin containing TCP1 subunit 5 [Source:RGD Symbol;Acc:735161]
Rps21	chr3	1823	1465	46.3661	48.9819	2.61583	1.05642	0.022199	0.524864	NotSig	-0.088863	negligible	97.2931	75.4081	119.178	0.210261	3.20731	1.58044	0.00133984	0.0391374	FDR<0.05	nonsignificant	ribosomal protein S21 [Source:RGD Symbol;Acc:621038]
Tmsb10	chr4	770	829	64.0286	69.1602	5.13163	1.08015	0.0214566	0.524864	NotSig	-0.112187	negligible	167.235	150.576	183.894	0.159198	1.73647	1.22126	0.0824806	0.305984	Not Sig	nonsignificant	thymosin, beta 10 [Source:RGD Symbol;Acc:62022]
Ldhb	chr4	669	665	74.1403	81.2036	7.06327	1.09527	0.0226139	0.524864	NotSig	-0.144096	negligible	178.357	164.971	191.743	0.153167	1.46313	1.16228	0.143431	0.415653	Not Sig	nonsignificant	lactate dehydrogenase B [Source:RGD Symbol;Acc:2997]
LOC687780	chr6	418	402	43.161	46.9245	3.7635	1.0872	0.0225236	0.524864	NotSig	-0.122193	negligible	225.059	195.845	254.274	0.159391	2.44063	1.29835	0.0146617	0.125834	Not Sig	nonsignificant	similar to Finkel-Biskis-Reilly murine sarcoma virusubiquitously expressed [Source:RGD Symbol;Acc:1597505]
Ubl5	chr8	286	294	65.5526	74.299	8.74631	1.13342	0.0223629	0.524864	NotSig	-0.18958	negligible	74.0515	66.9931	81.1099	0.189194	1.4184	1.21072	0.156075	0.434556	Not Sig	nonsignificant	ubiquitin-like 5 [Source:RGD Symbol;Acc:1564644]
Thy1	chr8	1303	1559	105.786	110.674	4.88848	1.04621	0.0224625	0.524864	NotSig	-0.0613141	negligible	300.237	316.991	283.483	0.167713	-0.970737	0.894293	0.331679	0.626706	Not Sig	nonsignificant	Thy-1 cell surface antigen [Source:RGD Symbol;Acc:3860]
Tmsb4x	chrX	3535	3567	70.9445	73.3387	2.39422	1.03375	0.0209034	0.524864	NotSig	-0.0485127	negligible	947.631	871.39	1023.87	0.109474	2.1201	1.17499	0.033998	0.191887	Not Sig	nonsignificant	thymosin beta 4, X-linked [Source:RGD Symbol;Acc:621622]
Stmn4	chr15	248	240	81.2804	94.2978	13.0174	1.16015	0.0227879	0.52528	NotSig	-0.231328	small	60.1151	53.9295	66.3008	0.218966	1.21499	1.2294	0.224371	0.539567	Not Sig	nonsignificant	stathmin 4 [Source:RGD Symbol;Acc:69349]
Calm2	chr6	766	985	69.8581	76.9064	7.0483	1.10089	0.0229121	0.526867	NotSig	-0.108301	negligible	218.06	215.41	220.71	0.149459	0.13171	1.0246	0.895213	0.953025	Not Sig	nonsignificant	calmodulin 2 [Source:RGD Symbol;Acc:2258]
Btf3	chr2	238	251	60.9247	71.4637	10.539	1.17298	0.0235469	0.52781	NotSig	-0.211951	small	56.799	52.9937	60.6042	0.224227	0.982108	1.14361	0.326047	0.622555	Not Sig	nonsignificant	basic transcription factor 3 [Source:RGD Symbol;Acc:1308095]
LOC685963	chr3	514	462	50.5615	55.3995	4.83799	1.09569	0.0231883	0.52781	NotSig	-0.0601338	negligible	120.451	106.261	134.642	0.189562	1.96558	1.26709	0.0493473	0.226698	Not Sig	nonsignificant
Rpl32	chr4	1570	1373	41.0821	43.6585	2.57636	1.06271	0.023299	0.52781	NotSig	-0.0838362	negligible	219.302	188.769	249.834	0.193527	2.12734	1.32349	0.0333918	0.189752	Not Sig	nonsignificant	ribosomal protein L32 [Source:RGD Symbol;Acc:621203]
Sdhb	chr5	164	195	75.2606	66.0664	-9.19414	0.877836	0.0238236	0.52781	NotSig	0.157811	negligible	44.4007	43.0293	45.772	0.228841	0.289141	1.06374	0.772473	0.896501	Not Sig	nonsignificant	succinate dehydrogenase complex iron sulfur subunit B [Source:RGD Symbol;Acc:1308598]
Hmgn1	chr11	166	122	68.0156	81.3999	13.3843	1.19678	0.0236662	0.52781	NotSig	-0.301884	small	35.679	29.7175	41.6406	0.258224	1.87542	1.40121	0.0607352	0.258803	Not Sig	nonsignificant	high mobility group nucleosome binding domain 1 [Source:RGD Symbol;Acc:1307761]
LOC103694169	chr18	401	392	46.8796	53.2015	6.32189	1.13485	0.0239585	0.527975	NotSig	-0.106563	negligible	111.116	103.077	119.154	0.188351	1.20628	1.15597	0.227708	0.541343	Not Sig	nonsignificant
Rpl37	chr10	78	51	53.5025	69.0903	15.5878	1.29135	0.024767	0.53242	NotSig	-0.452827	small	382.35	308.265	456.435	0.169654	3.35072	1.48066	0.000806026	0.029575	FDR<0.05	nonsignificant	ribosomal protein L37 [Source:RGD Symbol;Acc:41394010]
Reep5	chr18	705	755	74.5078	81.5476	7.03975	1.09448	0.0245895	0.53242	NotSig	-0.142214	negligible	114.58	120.91	108.251	0.165477	-1.03584	0.895301	0.300279	0.607152	Not Sig	nonsignificant	receptor accessory protein 5 [Source:RGD Symbol;Acc:1306047]
Rpl12	chr3	579	521	53.5071	58.0358	4.5287	1.08464	0.0246468	0.53242	NotSig	-0.0735788	negligible	64.4456	54.8523	74.0388	0.254445	1.7075	1.34978	0.0877299	0.317544	Not Sig	nonsignificant	ribosomal protein L12 [Source:RGD Symbol;Acc:1565106]
Itpka	chr3	121	170	80.3343	95.6394	15.3051	1.19052	0.0244754	0.53242	NotSig	-0.214642	small	35.9276	38.7031	33.1521	0.247297	-1.00265	0.856575	0.316029	0.613339	Not Sig	nonsignificant	inositol-trisphosphate 3-kinase A [Source:RGD Symbol;Acc:619950]
Ptms	chr4	919	897	67.0344	72.4681	5.43367	1.08106	0.0247795	0.53242	NotSig	-0.112826	negligible	247.24	228.427	266.054	0.136492	1.66976	1.16472	0.0949674	0.332502	Not Sig	nonsignificant	parathymosin [Source:RGD Symbol;Acc:621529]
Mlc1	chr7	860	744	100.047	105.924	5.87726	1.05875	0.0246372	0.53242	NotSig	-0.131076	negligible	188.305	165.814	210.795	0.158314	2.28802	1.27127	0.0221364	0.155468	Not Sig	nonsignificant	modulator of VRAC current 1 [Source:RGD Symbol;Acc:1308552]
Rnf10	chr12	269	310	56.6467	63.3407	6.69393	1.11817	0.0256735	0.535991	NotSig	-0.132472	negligible	81.7181	78.7597	84.6766	0.183324	0.572804	1.07513	0.566777	0.796443	Not Sig	nonsignificant	ring finger protein 10 [Source:RGD Symbol;Acc:1309282]
Itm2b	chr15	1439	1595	77.0227	81.5884	4.56562	1.05928	0.0256178	0.535991	NotSig	-0.0719306	negligible	361.527	355.968	367.086	0.136738	0.291128	1.03123	0.770954	0.896501	Not Sig	nonsignificant	integral membrane protein 2B [Source:RGD Symbol;Acc:620727]
Sdf2	chr10	146	151	61.3267	78.3173	16.9906	1.27705	0.0267461	0.547142	NotSig	-0.249071	small	39.411	37.6005	41.2215	0.24886	0.456958	1.0963	0.647701	0.843853	Not Sig	nonsignificant	stromal cell derived factor 2 [Source:RGD Symbol;Acc:1307274]
Prxl2a	chr16	267	260	76.85	84.9684	8.11844	1.10564	0.0268398	0.547142	NotSig	-0.180476	negligible	64.7681	61.1712	68.365	0.204851	0.898829	1.1176	0.368744	0.651464	Not Sig	nonsignificant	peroxiredoxin like 2A [Source:RGD Symbol;Acc:1309676]
Prrt1	chr20	254	317	82.56	98.5828	16.0227	1.19407	0.0266652	0.547142	NotSig	-0.187349	negligible	53.6997	59.0387	48.3606	0.226636	-1.32063	0.819134	0.186623	0.484876	Not Sig	nonsignificant	proline-rich transmembrane protein 1 [Source:RGD Symbol;Acc:1359348]
Pnma8b	chr1	316	355	74.7227	85.7043	10.9815	1.14696	0.026981	0.547214	NotSig	-0.144724	negligible	45.2545	50.9482	39.5608	0.242728	-1.55488	0.776491	0.119974	0.375482	Not Sig	nonsignificant	PNMA family member 8B [Source:RGD Symbol;Acc:1560435]
Plbd2	chr12	123	118	96.5137	85.1807	-11.333	0.882576	0.0271169	0.547214	NotSig	0.262525	small	32.3931	29.4125	35.3738	0.268451	0.927881	1.20268	0.353469	0.640399	Not Sig	nonsignificant	phospholipase B domain containing 2 [Source:RGD Symbol;Acc:708461]
Tax1bp1	chr4	159	184	74.563	86.9308	12.3678	1.16587	0.0271308	0.547214	NotSig	-0.268096	small	45.4009	46.4335	44.3684	0.238565	-0.278013	0.955526	0.781002	0.896865	Not Sig	nonsignificant	Tax1 binding protein 1 [Source:RGD Symbol;Acc:708579]
Acsl6	chr10	234	238	76.2043	89.5308	13.3265	1.17488	0.0280463	0.556293	NotSig	-0.176553	negligible	52.1714	47.3007	57.042	0.213672	1.16959	1.20594	0.242167	0.56157	Not Sig	nonsignificant	acyl-CoA synthetase long-chain family member 6 [Source:RGD Symbol;Acc:69403]
Cdc42	chr5	268	315	65.1362	75.9148	10.7786	1.16548	0.0279511	0.556293	NotSig	-0.142878	negligible	60.9785	64.9018	57.0553	0.213747	-0.877006	0.879102	0.380484	0.657163	Not Sig	nonsignificant	cell division cycle 42 [Source:RGD Symbol;Acc:71043]
Ptma	chr9	418	458	59.4138	66.6298	7.21604	1.12145	0.0278788	0.556293	NotSig	-0.121418	negligible	116.412	112.848	119.976	0.178112	0.590653	1.06316	0.554753	0.790631	Not Sig	nonsignificant
Phpt1	chr3	186	188	71.7816	82.4873	10.7057	1.14914	0.0285749	0.558603	NotSig	-0.185356	negligible	46.3661	42.9776	49.7546	0.244619	0.963861	1.15769	0.335116	0.628825	Not Sig	nonsignificant
Dstn	chr3	57	75	75.5456	97.8343	22.2886	1.29504	0.0287481	0.558603	NotSig	-0.411632	small	43.3578	42.1037	44.612	0.237736	0.487951	1.05958	0.625584	0.830334	Not Sig	nonsignificant	destrin, actin depolymerizing factor [Source:RGD Symbol;Acc:1588366]
Atp5f1d	chr7	332	330	70.3844	77.4908	7.10637	1.10097	0.0288167	0.558603	NotSig	-0.130544	negligible	89.5477	84.5462	94.5491	0.186873	0.970053	1.11831	0.33202	0.626706	Not Sig	nonsignificant	ATP synthase F1 subunit delta [Source:RGD Symbol;Acc:621372]
Tspan3	chr8	744	798	93.7195	100.688	6.96856	1.07436	0.0289246	0.558603	NotSig	-0.124306	negligible	193.133	185.259	201.008	0.155745	0.669063	1.08501	0.503455	0.747021	Not Sig	nonsignificant	tetraspanin 3 [Source:RGD Symbol;Acc:1359444]
Itm2c	chr9	1442	1495	77.6901	82.3449	4.65484	1.05992	0.0288118	0.558603	NotSig	-0.0676807	negligible	330.013	323.164	336.862	0.12068	0.45229	1.04239	0.65106	0.844249	Not Sig	nonsignificant	integral membrane protein 2C [Source:RGD Symbol;Acc:1309503]
Gnb1	chr5	547	563	95.1881	103.196	8.00756	1.08412	0.0292259	0.562082	NotSig	-0.105948	negligible	117.817	110.274	125.36	0.161236	1.12036	1.13681	0.26256	0.575213	Not Sig	nonsignificant	G protein subunit beta 1 [Source:RGD Symbol;Acc:2718]
LOC679739	chr1	305	306	59.3006	64.7608	5.46013	1.09208	0.0293541	0.562929	NotSig	-0.0732556	negligible	71.7691	66.4411	77.0972	0.195388	1.03099	1.16038	0.302548	0.609061	Not Sig	nonsignificant
Kif5b	chr17	264	228	74.1994	90.8029	16.6035	1.22377	0.0298071	0.562929	NotSig	-0.169068	negligible	36.4392	35.8693	37.0091	0.2623	0.0649415	1.03178	0.948221	0.977577	Not Sig	nonsignificant	kinesin family member 5B [Source:RGD Symbol;Acc:621559]
Snapc2	chr12	115	116	62.5874	75.7714	13.184	1.21065	0.0311363	0.569385	NotSig	-0.322266	small	32.2714	31.0074	33.5355	0.28374	0.561725	1.08153	0.574303	0.800598	Not Sig	nonsignificant	small nuclear RNA activating complex, polypeptide 2 [Source:RGD Symbol;Acc:1304589]
Ndufa2	chr18	245	246	57.4115	66.0564	8.64494	1.15058	0.0308593	0.569385	NotSig	-0.224297	small	59.0953	53.978	64.2126	0.209932	1.29091	1.18961	0.196736	0.499337	Not Sig	nonsignificant	NADH:ubiquinone oxidoreductase subunit A2 [Source:RGD Symbol;Acc:1309997]
Rpl34	chr2	950	737	43.5667	46.8407	3.27403	1.07515	0.0310652	0.569385	NotSig	-0.10784	negligible	74.4531	59.6994	89.2068	0.234647	2.52323	1.49427	0.0116282	0.112221	Not Sig	nonsignificant	ribosomal protein L34 [Source:RGD Symbol;Acc:1309402]
Kcnab2	chr5	574	843	88.7676	95.4862	6.71864	1.07569	0.0314382	0.569385	NotSig	-0.131766	negligible	99.5347	123.62	75.4497	0.175849	-3.92774	0.610337	8.57479e-05	0.00892314	FDR<0.05	nonsignificant	potassium voltage-gated channel subfamily A regulatory beta subunit 2 [Source:RGD Symbol;Acc:61828]
Camkv	chr8	341	378	105.669	117.706	12.0366	1.11391	0.0307954	0.569385	NotSig	-0.187073	negligible	46.6318	55.262	38.0016	0.241452	-2.07354	0.687662	0.0381217	0.203694	Not Sig	nonsignificant	CaM kinase-like vesicle-associated [Source:RGD Symbol;Acc:621488]
B4gat1	chr1	189	190	79.9016	91.498	11.5964	1.14513	0.0323521	0.57077	NotSig	-0.179338	negligible	40.8048	39.037	42.5727	0.246185	0.461632	1.09057	0.644345	0.84207	Not Sig	nonsignificant	beta-1,4-glucuronyltransferase 1 [Source:RGD Symbol;Acc:1309541]
Aldoc	chr10	2391	2119	68.8745	72.3108	3.43632	1.04989	0.0320761	0.57077	NotSig	-0.0535649	negligible	597.23	510.02	684.439	0.124131	3.40529	1.34198	0.000660944	0.0278792	FDR<0.05	nonsignificant	aldolase, fructose-bisphosphate C [Source:RGD Symbol;Acc:2091]
Wdr83os	chr19	128	128	68.2834	84.1976	15.9141	1.23306	0.0333349	0.57077	NotSig	-0.256444	small	34.6014	34.0488	35.1541	0.261626	0.421058	1.03246	0.673713	0.854583	Not Sig	nonsignificant	WD repeat domain 83 opposite strand [Source:RGD Symbol;Acc:1564058]
Atp5f1b	chr7	1145	1227	70.4985	74.9557	4.45728	1.06323	0.0329324	0.57077	NotSig	-0.0708561	negligible	319.922	308.634	331.21	0.138171	0.776071	1.07315	0.437707	0.696459	Not Sig	nonsignificant	ATP synthase F1 subunit beta [Source:RGD Symbol;Acc:621368]
Tle5	chr7	1287	1294	70.9636	74.4349	3.47132	1.04892	0.0327819	0.57077	NotSig	-0.0472814	negligible	304.391	285.477	323.305	0.12137	1.50874	1.13251	0.131364	0.396335	Not Sig	nonsignificant	TLE family member 5, transcriptional modulator [Source:RGD Symbol;Acc:2731]
Ei24	chr8	182	170	68.3269	80.1831	11.8562	1.17352	0.0317674	0.57077	NotSig	-0.248153	small	41.1405	38.8903	43.3907	0.24371	0.873871	1.11572	0.382189	0.65746	Not Sig	nonsignificant	EI24, autophagy associated transmembrane protein [Source:RGD Symbol;Acc:1309868]
Pomp	chr12	281	242	59.8601	67.9477	8.08769	1.13511	0.03359	0.571029	NotSig	-0.192155	negligible	66.8831	58.6705	75.0957	0.199414	1.88847	1.27996	0.058963	0.254996	Not Sig	nonsignificant	proteasome maturation protein [Source:RGD Symbol;Acc:1305831]
Ivns1abp	chr13	129	134	85.6566	103.284	17.6279	1.2058	0.0338443	0.571547	NotSig	-0.320409	small	30.0334	28.2413	31.8255	0.269311	0.686366	1.12692	0.492482	0.737742	Not Sig	nonsignificant	influenza virus NS1A binding protein [Source:RGD Symbol;Acc:1306290]
Atp6v0c	chr10	1886	2250	92.9559	96.8708	3.91486	1.04212	0.0346117	0.578077	NotSig	-0.0487184	negligible	535.036	543.278	526.793	0.115828	-0.37661	0.969657	0.706464	0.869373	Not Sig	nonsignificant	ATPase H+ transporting V0 subunit C [Source:RGD Symbol;Acc:621394]
Aqp4	chr18	572	564	102.228	110.981	8.75305	1.08562	0.0345782	0.578077	NotSig	-0.106174	negligible	111.863	100.888	122.838	0.18057	1.51316	1.21756	0.130239	0.395822	Not Sig	nonsignificant	aquaporin 4 [Source:RGD Symbol;Acc:2143]
Pfdn1	chr18	179	173	53.3017	63.2464	9.94463	1.18657	0.0345161	0.578077	NotSig	-0.244697	small	46.3059	39.5685	53.0432	0.240976	1.83535	1.34054	0.0664546	0.271142	Not Sig	nonsignificant	prefoldin subunit 1 [Source:RGD Symbol;Acc:1305603]
Rpl6	chr12	658	587	60.5042	65.4476	4.94338	1.0817	0.0347597	0.578448	NotSig	-0.102207	negligible	78.042	63.6104	92.4735	0.20663	2.78035	1.45375	0.00542999	0.0837124	Not Sig	nonsignificant	ribosomal protein L6 [Source:RGD Symbol;Acc:619826]
Sirpa	chr3	343	344	99.288	109.827	10.5392	1.10615	0.0355387	0.578448	NotSig	-0.0918992	negligible	32.8672	36.2567	29.4778	0.300989	-1.01648	0.813032	0.3094	0.611536	Not Sig	nonsignificant	signal-regulatory protein alpha [Source:RGD Symbol;Acc:3449]
Cycs	chr4	257	298	60.1606	67.8216	7.661	1.12734	0.0351583	0.578448	NotSig	-0.17736	negligible	50.2893	51.079	49.4997	0.229235	-0.386183	0.969081	0.699361	0.866015	Not Sig	nonsignificant	cytochrome c, somatic [Source:RGD Symbol;Acc:2451]
Sfxn5	chr4	502	531	79.2382	86.1543	6.91607	1.08728	0.0352935	0.578448	NotSig	-0.1273	negligible	67.3028	65.7875	68.8182	0.19702	0.342143	1.04607	0.732243	0.878329	Not Sig	nonsignificant	sideroflexin 5 [Source:RGD Symbol;Acc:628706]
Rps7	chr6	926	754	45.4935	49.3322	3.83873	1.08438	0.0357193	0.578448	NotSig	-0.153197	negligible	49.3386	32.6854	65.9917	0.241023	3.99247	2.019	6.5389e-05	0.00725817	FDR<0.05	upregulated	ribosomal protein S7 [Source:RGD Symbol;Acc:61907]
Ptpa	chr3	181	200	68.8943	79.5717	10.6773	1.15498	0.0359099	0.578448	NotSig	-0.209722	small	42.1876	43.0106	41.3646	0.239237	-0.233635	0.961729	0.815268	0.916558	Not Sig	nonsignificant	protein phosphatase 2 phosphatase activator [Source:RGD Symbol;Acc:1308354]
Pgam1	chr1	530	569	80.4772	87.2815	6.8043	1.08455	0.0360221	0.578621	NotSig	-0.125609	negligible	127.6	127.705	127.495	0.156862	0.0564954	0.998353	0.954947	0.980605	Not Sig	nonsignificant	phosphoglycerate mutase 1 [Source:RGD Symbol;Acc:3312]
Ndufb8	chr1	492	466	52.2616	57.1435	4.88194	1.09341	0.0362044	0.57927	NotSig	-0.0845634	negligible	127.673	115.313	140.033	0.165835	1.79012	1.21437	0.0734353	0.286616	Not Sig	nonsignificant	NADH:ubiquinone oxidoreductase subunit B8 [Source:RGD Symbol;Acc:1309129]
Mapk3	chr1	241	244	76.1096	84.9486	8.83896	1.11613	0.0373055	0.582755	NotSig	-0.18531	negligible	62.8283	59.4976	66.1591	0.197017	0.771856	1.11196	0.4402	0.696704	Not Sig	nonsignificant	mitogen activated protein kinase 3 [Source:RGD Symbol;Acc:3046]
Cltb	chr17	168	184	56.5146	67.3141	10.7995	1.19109	0.0379456	0.587357	NotSig	-0.266478	small	44.7187	42.3585	47.0789	0.232668	0.53091	1.11144	0.595481	0.815359	Not Sig	nonsignificant	clathrin, light chain B [Source:RGD Symbol;Acc:621353]
LOC684988	chr3	629	577	46.8763	50.7823	3.90594	1.08332	0.0378638	0.587357	NotSig	-0.134822	negligible	180.886	154.962	206.809	0.168595	2.47576	1.33458	0.0132952	0.117124	Not Sig	nonsignificant
Map1a	chr3	575	638	76.5346	86.1302	9.59561	1.12538	0.0380055	0.587357	NotSig	-0.0683796	negligible	90.5546	92.8652	88.244	0.191486	-0.321724	0.950237	0.747662	0.885389	Not Sig	nonsignificant	microtubule-associated protein 1A [Source:RGD Symbol;Acc:3042]
Arl8a	chr13	228	241	82.6923	94.4651	11.7727	1.14237	0.0385568	0.59013	NotSig	-0.207488	small	57.8062	55.893	59.7194	0.211479	0.570481	1.06846	0.568351	0.796443	Not Sig	nonsignificant	ADP-ribosylation factor like GTPase 8A [Source:RGD Symbol;Acc:1565940]
Tubb4a	chr9	791	889	72.3402	78.378	6.0378	1.08346	0.0389243	0.591948	NotSig	-0.0927967	negligible	88.4327	97.9364	78.9291	0.203485	-1.5868	0.805922	0.112559	0.368193	Not Sig	nonsignificant	tubulin, beta 4A class IVa [Source:RGD Symbol;Acc:619730]
Hnrnph1	chr10	154	186	134.06	117.929	-16.1309	0.879674	0.0397168	0.59567	NotSig	0.218953	small	41.4833	43.1591	39.8075	0.242742	-0.409795	0.922343	0.681957	0.857597	Not Sig	nonsignificant	heterogeneous nuclear ribonucleoprotein H1 [Source:RGD Symbol;Acc:620840]
Myl6	chr7	711	624	73.6611	79.937	6.2759	1.0852	0.0394539	0.59567	NotSig	-0.0790403	negligible	174.526	151.648	197.404	0.151925	2.54529	1.30173	0.0109185	0.112221	Not Sig	nonsignificant	myosin light chain 6 [Source:RGD Symbol;Acc:1589019]
LOC100364427	chr1	212	175	45.6538	51.6266	5.97282	1.13083	0.0418094	0.596043	NotSig	-0.198864	negligible	38.604	30.1957	47.0123	0.280093	2.104	1.55692	0.0353784	0.195698	Not Sig	nonsignificant	ribosomal protein S12-like [Source:RGD Symbol;Acc:2321033]
Ctsd	chr1	435	420	77.1691	84.3627	7.19362	1.09322	0.042011	0.596043	NotSig	-0.0842453	negligible	104.574	99.3932	109.754	0.178537	0.817767	1.10424	0.41349	0.683915	Not Sig	nonsignificant	cathepsin D [Source:RGD Symbol;Acc:621511]
Mrpl27	chr10	112	99	60.2925	73.1613	12.8687	1.21344	0.041534	0.596043	NotSig	-0.266337	small	26.5951	21.5195	31.6707	0.292026	1.6505	1.47172	0.0988404	0.340723	Not Sig	nonsignificant	mitochondrial ribosomal protein L27 [Source:RGD Symbol;Acc:1309090]
Cdk2ap1	chr12	249	227	60.2559	69.0526	8.79674	1.14599	0.0408324	0.596043	NotSig	-0.221475	small	63.0779	53.3037	72.8521	0.214623	2.13606	1.36674	0.0326747	0.187278	Not Sig	nonsignificant	cyclin-dependent kinase 2 associated protein 1 [Source:RGD Symbol;Acc:1308664]
Glul	chr13	2688	2560	65.0146	68.0146	2.99999	1.04614	0.0415842	0.596043	NotSig	-0.0403061	negligible	447.995	439.63	456.36	0.117268	0.500407	1.03805	0.616789	0.826189	Not Sig	nonsignificant	glutamate-ammonia ligase [Source:RGD Symbol;Acc:2710]
Ghitm	chr16	269	324	87.9131	99.1577	11.2446	1.12791	0.0416925	0.596043	NotSig	-0.156289	negligible	70.8468	73.7171	67.9764	0.201018	-0.533045	0.922126	0.594002	0.814528	Not Sig	nonsignificant	growth hormone inducible transmembrane protein [Source:RGD Symbol;Acc:1359301]
LOC100911664	chr17	185	204	85.4761	99.119	13.6429	1.15961	0.0413253	0.596043	NotSig	-0.250293	small	41.9052	42.2187	41.5918	0.254105	0.0473222	0.98515	0.962256	0.984008	Not Sig	nonsignificant
Hmgcs1	chr2	605	615	84.1757	93.1708	8.9951	1.10686	0.0404803	0.596043	NotSig	-0.0984168	negligible	108.319	110.525	106.113	0.183186	-0.455229	0.960089	0.648945	0.843853	Not Sig	nonsignificant	3-hydroxy-3-methylglutaryl-CoA synthase 1 [Source:RGD Symbol;Acc:70970]
Stxbp1	chr3	373	540	99.9582	109.452	9.49342	1.09497	0.0418666	0.596043	NotSig	-0.114686	negligible	80.0533	101.724	58.383	0.212722	-3.59102	0.573938	0.000329387	0.0219372	FDR<0.05	nonsignificant	syntaxin binding protein 1 [Source:RGD Symbol;Acc:3785]
Hadhb	chr6	131	135	79.4236	98.398	18.9744	1.2389	0.0408974	0.596043	NotSig	-0.205621	small	35.2955	32.654	37.937	0.276992	0.701445	1.16179	0.483025	0.729122	Not Sig	nonsignificant	hydroxyacyl-CoA dehydrogenase trifunctional multienzyme complex subunit beta [Source:RGD Symbol;Acc:620513]
Rpl41	chr7	1955	1639	54.3203	56.8042	2.48382	1.04573	0.0410707	0.596043	NotSig	-0.0872076	negligible	180.084	141.72	218.447	0.338831	1.86104	1.5414	0.062739	0.264375	Not Sig	nonsignificant
Lynx1	chr7	265	292	115.178	123.399	8.22107	1.07138	0.0403403	0.596043	NotSig	-0.154089	negligible	26.955	32.9826	20.9273	0.299101	-2.28176	0.634497	0.0225033	0.155468	Not Sig	nonsignificant	Ly6/neurotoxin 1 [Source:RGD Symbol;Acc:1312017]
Rpl36	chr9	675	571	53.1229	56.9204	3.79745	1.07148	0.0400327	0.596043	NotSig	-0.112689	negligible	44.2159	38.401	50.0308	0.241864	1.67711	1.30285	0.0935219	0.331306	Not Sig	nonsignificant
Slc22a17	chr15	1106	1352	84.7673	80.5495	-4.21785	0.950242	0.0422073	0.596162	NotSig	0.101164	negligible	324.146	325.4	322.892	0.139718	-0.175755	0.992293	0.860487	0.938866	Not Sig	nonsignificant	solute carrier family 22, member 17 [Source:RGD Symbol;Acc:631405]
Mrfap1	chr14	613	600	71.2575	77.2722	6.01465	1.08441	0.042447	0.597339	NotSig	-0.113336	negligible	143.097	135.157	151.038	0.155501	1.03823	1.1175	0.299163	0.606334	Not Sig	nonsignificant
Igsf8	chr13	211	238	67.579	79.415	11.8359	1.17514	0.0431138	0.598314	NotSig	-0.111374	negligible	59.6376	55.6681	63.6072	0.208361	0.827606	1.14262	0.407893	0.681186	Not Sig	nonsignificant	immunoglobulin superfamily, member 8 [Source:RGD Symbol;Acc:1311500]
Mpc2	chr13	247	270	63.7252	72.7141	8.98888	1.14106	0.0447919	0.607446	NotSig	-0.113175	negligible	65.6344	61.5108	69.7581	0.192637	0.933475	1.13408	0.350575	0.639443	Not Sig	nonsignificant	mitochondrial pyruvate carrier 2 [Source:RGD Symbol;Acc:1563422]
Ank3	chr20	357	364	71.4952	82.051	10.5558	1.14764	0.0450089	0.607446	NotSig	-0.126575	negligible	56.5661	59.9653	53.167	0.230527	-0.789495	0.886629	0.429823	0.693909	Not Sig	nonsignificant	ankyrin 3 [Source:RGD Symbol;Acc:620157]
Hpca	chr5	724	976	89.9819	95.2324	5.25043	1.05835	0.044632	0.607446	NotSig	-0.0897747	negligible	192.512	210.57	174.455	0.171856	-1.568	0.828487	0.116882	0.37353	Not Sig	nonsignificant	hippocalcin [Source:RGD Symbol;Acc:620060]
Mif	chr20	384	380	77.8822	85.3416	7.45943	1.09578	0.0455984	0.607887	NotSig	-0.13137	negligible	98.7828	91.2072	106.358	0.184476	1.27734	1.16612	0.201483	0.505986	Not Sig	nonsignificant	macrophage migration inhibitory factor [Source:RGD Symbol;Acc:621163]
Txn2	chr7	125	144	62.3956	74.3459	11.9503	1.19152	0.0459643	0.607887	NotSig	-0.209586	small	33.7323	31.9214	35.5433	0.265043	0.37198	1.11346	0.709908	0.870021	Not Sig	nonsignificant	thioredoxin 2 [Source:RGD Symbol;Acc:71040]
Fasn	chr10	209	232	90.6927	103.125	12.4324	1.13708	0.0466634	0.608916	NotSig	-0.221681	small	35.7259	37.4213	34.0306	0.25652	-0.624343	0.909392	0.532402	0.772169	Not Sig	nonsignificant	fatty acid synthase [Source:RGD Symbol;Acc:620665]
Sars1	chr2	120	117	83.6057	100.052	16.4465	1.19671	0.0466029	0.608916	NotSig	-0.252585	small	31.1568	28.8537	33.4598	0.290583	0.80592	1.15964	0.420289	0.686734	Not Sig	nonsignificant	seryl-tRNA synthetase 1 [Source:RGD Symbol;Acc:628813]
Ppp1r1a	chr7	268	279	68.7774	74.9402	6.16278	1.0896	0.0474369	0.610269	NotSig	-0.0881159	negligible	65.9643	65.0278	66.9008	0.202873	0.266385	1.0288	0.789943	0.902714	Not Sig	nonsignificant	protein phosphatase 1, regulatory (inhibitor) subunit 1A [Source:RGD Symbol;Acc:62018]
Tafa5	chr7	213	256	75.07	65.4499	-9.62016	0.871851	0.0482416	0.615349	NotSig	0.148558	negligible	37.6587	39.5365	35.7808	0.255235	-0.540142	0.905007	0.589099	0.812086	Not Sig	nonsignificant	TAFA chemokine like family member 5 [Source:RGD Symbol;Acc:1562115]
Map4	chr8	423	489	95.398	105.162	9.76408	1.10235	0.0483489	0.615349	NotSig	-0.105083	negligible	65.0225	73.7903	56.2547	0.198081	-2.06797	0.762359	0.0386433	0.203694	Not Sig	nonsignificant	microtubule-associated protein 4 [Source:RGD Symbol;Acc:1564359]
Taldo1	chr1	121	146	72.9995	62.0621	-10.9374	0.850172	0.048536	0.615421	NotSig	0.172915	negligible	37.3042	36.6164	37.992	0.254072	0.206906	1.03757	0.836083	0.926816	Not Sig	nonsignificant	transaldolase 1 [Source:RGD Symbol;Acc:620674]
Eif3k	chr1	150	151	57.4856	65.4814	7.99581	1.13909	0.0488719	0.615633	NotSig	-0.0991981	negligible	41.6333	39.7685	43.4981	0.261174	0.578575	1.09378	0.562876	0.796252	Not Sig	nonsignificant	eukaryotic translation initiation factor 3, subunit K [Source:RGD Symbol;Acc:1309221]
Mbd3	chr7	270	210	64.5997	73.2748	8.6751	1.13429	0.0487799	0.615633	NotSig	-0.164622	negligible	63.8263	49.8296	77.823	0.216102	2.87084	1.56178	0.00409382	0.0756471	Not Sig	nonsignificant	methyl-CpG binding domain protein 3 [Source:RGD Symbol;Acc:1307389]
Rps9l1	chr1	696	550	50.2541	53.7847	3.53066	1.07026	0.0490567	0.616224	NotSig	-0.108971	negligible	162.518	128.438	196.597	0.171653	3.56411	1.53067	0.000365099	0.0227444	FDR<0.05	nonsignificant
Hras	chr1	175	183	62.6748	72.4989	9.82413	1.15675	0.0491485	0.616224	NotSig	-0.168225	negligible	44.97	41.3675	48.5726	0.231341	0.962093	1.17417	0.336003	0.628825	Not Sig	nonsignificant	HRas proto-oncogene, GTPase [Source:RGD Symbol;Acc:2827]
Hnrnpl	chr1	270	309	72.1794	82.7137	10.5343	1.14595	0.0494031	0.618026	NotSig	-0.125681	negligible	79.0476	76.4971	81.5981	0.182389	0.496346	1.06668	0.61965	0.8281	Not Sig	nonsignificant	heterogeneous nuclear ribonucleoprotein L [Source:RGD Symbol;Acc:71059]
Emc10	chr1	231	228	87.325	97.4987	10.1737	1.1165	0.0496573	0.618158	NotSig	-0.157044	negligible	53.6935	49.005	58.3821	0.221962	1.05245	1.19135	0.292592	0.600698	Not Sig	nonsignificant	ER membrane protein complex subunit 10 [Source:RGD Symbol;Acc:1303214]
Igsf1	chrX	106	106	92.2825	105.486	13.2039	1.14308	0.0496734	0.618158	NotSig	-0.232231	small	26.534	24.031	29.037	0.282173	0.870431	1.20831	0.384065	0.657889	Not Sig	nonsignificant	immunoglobulin superfamily, member 1 [Source:RGD Symbol;Acc:631402]
RGD1307100	chr2	105	95	125.675	98.4575	-27.2179	0.783427	0.050323	0.620579	NotSig	0.241726	small	25.6952	23.6474	27.743	0.293816	0.969369	1.1732	0.332361	0.626706	Not Sig	nonsignificant
Ppia	chr14	633	722	93.8872	101.341	7.45431	1.0794	0.0505594	0.621209	NotSig	-0.110688	negligible	120.326	118.626	122.026	0.185076	0.351652	1.02866	0.7251	0.876754	Not Sig	nonsignificant	peptidylprolyl isomerase A [Source:RGD Symbol;Acc:3372]
Mpc1	chr1	256	214	82.4138	73.7871	-8.62663	0.895325	0.0520646	0.627711	NotSig	0.174131	negligible	64.3924	55.8066	72.9782	0.204928	2.04816	1.3077	0.0405444	0.209647	Not Sig	nonsignificant	mitochondrial pyruvate carrier 1 [Source:RGD Symbol;Acc:620902]
Mgat4b	chr10	104	107	86.1336	103.364	17.2301	1.20004	0.0522823	0.627711	NotSig	-0.299373	small	26.4643	24.8767	28.0519	0.290447	0.57168	1.12764	0.567539	0.796443	Not Sig	nonsignificant	alpha-1,3-mannosyl-glycoprotein 4-beta-N-acetylglucosaminyltransferase B [Source:RGD Symbol;Acc:1562836]
Nenf	chr13	148	153	67.6822	77.3108	9.6286	1.14226	0.0527687	0.627711	NotSig	-0.125002	negligible	37.2487	35.4655	39.0319	0.251972	0.482162	1.10056	0.629691	0.83162	Not Sig	nonsignificant	neudesin neurotrophic factor [Source:RGD Symbol;Acc:1303289]
Rps23	chr2	1865	1558	44.0647	45.9232	1.85847	1.04218	0.053303	0.627711	NotSig	-0.0888844	negligible	395.011	333.422	456.599	0.194517	2.36482	1.36943	0.0180388	0.141536	Not Sig	nonsignificant	ribosomal protein S23 [Source:RGD Symbol;Acc:621039]
Tomm7	chr4	269	227	59.7382	66.6623	6.9241	1.11591	0.051882	0.627711	NotSig	-0.111209	negligible	65.5948	57.8011	73.3885	0.210836	1.90851	1.26967	0.0563252	0.24509	Not Sig	nonsignificant	translocase of outer mitochondrial membrane 7 [Source:RGD Symbol;Acc:1591393]
Cnbp	chr4	278	273	85.2372	96.3977	11.1605	1.13094	0.0520047	0.627711	NotSig	-0.139449	negligible	61.6663	61.0917	62.2408	0.206706	0.161715	1.01881	0.87153	0.942538	Not Sig	nonsignificant	CCHC-type zinc finger, nucleic acid binding protein [Source:RGD Symbol;Acc:621807]
Septin3	chr7	263	299	75.1801	85.5994	10.4193	1.13859	0.0523608	0.627711	NotSig	-0.145438	negligible	51.3719	52.2808	50.463	0.231603	-0.0737248	0.96523	0.941229	0.97405	Not Sig	nonsignificant	septin 3 [Source:RGD Symbol;Acc:621745]
Retreg2	chr9	335	351	90.3632	99.4325	9.06927	1.10036	0.0526289	0.627711	NotSig	-0.150171	negligible	73.494	73.7386	73.2493	0.21472	0.0569091	0.993365	0.954618	0.980605	Not Sig	nonsignificant	reticulophagy regulator family member 2 [Source:RGD Symbol;Acc:1306844]
Rnf112	chr10	160	150	127.971	106.896	-21.0746	0.835317	0.0537014	0.628017	NotSig	0.244141	small	29.9463	30.8407	29.052	0.283457	-0.271709	0.942004	0.785846	0.899886	Not Sig	nonsignificant	ring finger protein 112 [Source:RGD Symbol;Acc:3986]
Psmc1	chr6	127	142	57.7463	69.0021	11.2558	1.19492	0.053764	0.628017	NotSig	-0.166665	negligible	36.9951	38.3174	35.6727	0.263903	-0.210187	0.930979	0.833521	0.925209	Not Sig	nonsignificant	proteasome 26S subunit, ATPase 1 [Source:RGD Symbol;Acc:621097]
Rps15a	chr1	856	739	52.0315	54.9961	2.96458	1.05698	0.05402	0.629462	NotSig	-0.0669606	negligible	35.0497	29.6408	40.4585	0.292796	1.62843	1.36496	0.103434	0.350748	Not Sig	nonsignificant	ribosomal protein S15a [Source:RGD Symbol;Acc:619939]
Gnas	chr3	1562	1579	83.0638	87.9627	4.89885	1.05898	0.0548714	0.635493	NotSig	-0.0703153	negligible	411.673	383.335	440.011	0.123977	1.57836	1.14785	0.114484	0.372296	Not Sig	nonsignificant	GNAS complex locus [Source:RGD Symbol;Acc:2716]
Stmn1	chr5	282	279	72.5324	80.8955	8.36312	1.1153	0.0550531	0.63605	NotSig	-0.1724	negligible	70.9016	65.6697	76.1334	0.199863	1.16255	1.15934	0.245014	0.565809	Not Sig	nonsignificant	stathmin 1 [Source:RGD Symbol;Acc:2992]
Mettl9	chr1	124	131	74.6981	89.2383	14.5402	1.19465	0.0562033	0.636653	NotSig	-0.24744	small	34.6588	32.2339	37.0836	0.255532	0.680322	1.15045	0.496301	0.742444	Not Sig	nonsignificant	methyltransferase like 9 [Source:RGD Symbol;Acc:2311609]
Limd2	chr10	137	161	65.8934	82.7008	16.8074	1.25507	0.0561159	0.636653	NotSig	-0.208681	small	36.2191	38.4698	33.9685	0.261304	-0.439833	0.882991	0.660058	0.846472	Not Sig	nonsignificant	LIM domain containing 2 [Source:RGD Symbol;Acc:1309967]
Uba52	chr16	1824	1560	60.6764	62.8036	2.12714	1.03506	0.0553247	0.636653	NotSig	-0.0593276	negligible	465.4	392.635	538.165	0.143372	3.2081	1.37065	0.00133615	0.0391374	FDR<0.05	nonsignificant	ubiquitin A-52 residue ribosomal protein fusion product 1 [Source:RGD Symbol;Acc:68344]
Rps10	chr20	563	444	46.2648	50.1203	3.85548	1.08334	0.0558653	0.636653	NotSig	-0.0733945	negligible	27.2983	20.1164	34.4803	0.359561	2.18034	1.71404	0.0292326	0.17508	Not Sig	nonsignificant	ribosomal protein S10 [Source:RGD Symbol;Acc:621024]
Ywhab	chr3	421	510	85.9533	93.4135	7.46015	1.08679	0.0559128	0.636653	NotSig	-0.111671	negligible	87.3771	93.8571	80.8971	0.200745	-1.13779	0.861918	0.25521	0.571838	Not Sig	nonsignificant	tyrosine 3-monooxygenase/tryptophan 5-monooxygenase activation protein, beta [Source:RGD Symbol;Acc:61998]
Bzw1	chr9	128	157	74.3333	87.664	13.3307	1.17934	0.0553543	0.636653	NotSig	-0.200114	small	26.0234	27.7154	24.3315	0.306737	-0.758145	0.877906	0.448364	0.698648	Not Sig	nonsignificant	basic leucine zipper and W2 domains 1 [Source:RGD Symbol;Acc:735129]
Rgcc	chr15	188	156	68.462	81.4299	12.968	1.18942	0.0565252	0.636828	NotSig	-0.237857	small	43.3863	37.8043	48.9683	0.254906	1.47687	1.29531	0.13971	0.411711	Not Sig	nonsignificant	regulator of cell cycle [Source:RGD Symbol;Acc:619721]
Olig1	chr11	577	537	76.4643	81.4596	4.99528	1.06533	0.0571015	0.642561	NotSig	-0.107153	negligible	103.775	98.0736	109.477	0.183847	0.892365	1.11627	0.372197	0.653783	Not Sig	nonsignificant	oligodendrocyte transcription factor 1 [Source:RGD Symbol;Acc:621129]
Eef1g	chr1	629	598	61.7366	66.1583	4.42168	1.07162	0.0575908	0.643099	NotSig	-0.0991004	negligible	161.045	143.063	179.026	0.157501	2.03952	1.25138	0.0413983	0.210789	Not Sig	nonsignificant	eukaryotic translation elongation factor 1 gamma [Source:RGD Symbol;Acc:1302939]
Hba-a2	chr10	18489	13744	41.5789	41.9591	0.380151	1.00914	0.0579193	0.643099	NotSig	-0.0101645	negligible	4813.48	3922.35	5704.6	0.54805	0.986337	1.45438	0.323968	0.622555	Not Sig	nonsignificant
Actr2	chr14	236	308	84.1757	94.8615	10.6858	1.12695	0.0578749	0.643099	NotSig	-0.178991	negligible	43.6465	50.9975	36.2956	0.242115	-2.03255	0.711713	0.0420978	0.212188	Not Sig	nonsignificant	actin related protein 2 [Source:RGD Symbol;Acc:1310826]
Syt11	chr2	1011	1109	93.9865	100.926	6.93912	1.07383	0.0575182	0.643099	NotSig	-0.0678138	negligible	124.579	144.17	104.988	0.171497	-2.70393	0.728224	0.00685251	0.0963437	Not Sig	nonsignificant	synaptotagmin 11 [Source:RGD Symbol;Acc:62042]
Morf4l1	chr8	300	340	73.5491	82.0957	8.54659	1.1162	0.0583877	0.646779	NotSig	-0.186147	negligible	66.8386	65.3023	68.3748	0.205542	0.348949	1.04705	0.727127	0.877094	Not Sig	nonsignificant	mortality factor 4 like 1 [Source:RGD Symbol;Acc:1307938]
Efnb3	chr10	170	196	71.0857	85.1442	14.0585	1.19777	0.0590033	0.647133	NotSig	-0.181444	negligible	33.4378	37.1313	29.7443	0.276491	-1.10996	0.801059	0.267016	0.580058	Not Sig	nonsignificant	ephrin B3 [Source:RGD Symbol;Acc:2541]
Hsp90b1	chr7	375	431	66.0449	75.4941	9.44919	1.14307	0.0594469	0.648267	NotSig	-0.11503	negligible	104.742	103.418	106.066	0.188421	0.232765	1.0256	0.815944	0.916698	Not Sig	nonsignificant	heat shock protein 90 beta family member 1 [Source:RGD Symbol;Acc:1310482]
Eef1b2	chr9	347	313	53.4767	58.9592	5.4825	1.10252	0.0595293	0.64842	NotSig	-0.112994	negligible	90.0615	75.5414	104.582	0.209451	2.20176	1.38443	0.0276821	0.169503	Not Sig	nonsignificant	eukaryotic translation elongation factor 1 beta 2 [Source:RGD Symbol;Acc:1311415]
Phb	chr10	156	169	66.2743	77.3545	11.0802	1.16719	0.0601829	0.64845	NotSig	-0.149538	negligible	30.9326	31.4818	30.3833	0.263289	-0.239232	0.965107	0.810926	0.914671	Not Sig	nonsignificant
Csrp1	chr13	418	356	68.6803	76.2053	7.52506	1.10957	0.0602813	0.64845	NotSig	-0.126819	negligible	85.1879	72.2804	98.0954	0.183537	2.34613	1.35715	0.0189696	0.143565	Not Sig	nonsignificant	cysteine and glycine-rich protein 1 [Source:RGD Symbol;Acc:62053]
Brk1	chr4	282	283	81.0641	90.17	9.10591	1.11233	0.0599922	0.64845	NotSig	-0.13056	negligible	68.023	64.2798	71.7662	0.201063	0.792543	1.11647	0.428044	0.693909	Not Sig	nonsignificant	BRICK1 subunit of SCAR/WAVE actin nucleating complex [Source:RGD Symbol;Acc:1598136]
Crip2	chr6	146	155	70.6481	83.4837	12.8355	1.18168	0.0599668	0.64845	NotSig	-0.162666	negligible	39.9967	37.3162	42.6773	0.243581	0.922301	1.14367	0.356371	0.641666	Not Sig	nonsignificant	cysteine-rich protein 2 [Source:RGD Symbol;Acc:1302959]
Chchd10	chr20	505	495	60.6858	65.8429	5.15709	1.08498	0.0610393	0.649243	NotSig	-0.116182	negligible	136.941	122.53	151.352	0.157519	1.96491	1.23523	0.0494242	0.226698	Not Sig	nonsignificant	coiled-coil-helix-coiled-coil-helix domain containing 10 [Source:RGD Symbol;Acc:1359417]
Cnp	chr10	1557	1649	79.7195	84.063	4.34356	1.05449	0.0630589	0.656755	NotSig	-0.0631866	negligible	358.313	356.315	360.311	0.121494	0.171054	1.01121	0.864182	0.938941	Not Sig	nonsignificant	2',3'-cyclic nucleotide 3' phosphodiesterase [Source:RGD Symbol;Acc:2368]
Ggt7	chr3	227	240	95.5917	85.8954	-9.69629	0.898566	0.0626095	0.656755	NotSig	0.177406	negligible	55.9414	54.4563	57.4266	0.212746	0.38379	1.05454	0.701134	0.866015	Not Sig	nonsignificant	gamma-glutamyltransferase 7 [Source:RGD Symbol;Acc:619870]
Arpp21	chr8	116	129	59.3342	73.1669	13.8328	1.23313	0.0640773	0.658054	NotSig	-0.257851	small	27.6483	26.16	29.1366	0.302145	0.322722	1.11378	0.746906	0.885389	Not Sig	nonsignificant	cAMP regulated phosphoprotein 21 [Source:RGD Symbol;Acc:1593239]
LOC103693330	chr10	496	422	65.6765	71.8461	6.16962	1.09394	0.0648235	0.661436	NotSig	-0.132776	negligible	58.3017	54.1913	62.4122	0.208205	0.836197	1.1517	0.403044	0.677847	Not Sig	nonsignificant
Ppfia3	chr1	104	149	78.378	96.6544	18.2764	1.23318	0.0650657	0.662951	NotSig	-0.199445	negligible	28.5894	32.2467	24.9322	0.276304	-1.26157	0.773171	0.207103	0.513136	Not Sig	nonsignificant	PTPRF interacting protein alpha 3 [Source:RGD Symbol;Acc:620054]
Mapre2	chr18	170	223	70.6007	78.4903	7.8896	1.11175	0.0654084	0.663139	NotSig	-0.208181	small	30.8349	38.2887	23.3812	0.274795	-2.52613	0.610656	0.0115325	0.112221	Not Sig	nonsignificant
Arl2	chr1	107	103	82.1428	98.6766	16.5338	1.20128	0.0655817	0.663242	NotSig	-0.294962	small	25.3595	22.0635	28.6556	0.310671	1.06926	1.29878	0.284952	0.595117	Not Sig	nonsignificant	ADP-ribosylation factor like GTPase 2 [Source:RGD Symbol;Acc:69326]
Asmtl	chr12	113	79	68.4834	79.2946	10.8111	1.15787	0.066007	0.663629	NotSig	-0.203872	small	25.0485	17.8549	32.242	0.319114	2.59136	1.80578	0.0095597	0.108779	Not Sig	nonsignificant	acetylserotonin O-methyltransferase-like [Source:RGD Symbol;Acc:1306877]
Ppp2cb	chr16	136	150	69.6423	83.6187	13.9763	1.20069	0.0670773	0.666571	NotSig	-0.235879	small	38.3733	36.6742	40.0725	0.244164	0.572466	1.09266	0.567006	0.796443	Not Sig	nonsignificant	protein phosphatase 2 catalytic subunit beta [Source:RGD Symbol;Acc:3381]
Ap3b2	chr1	113	129	111.213	91.6136	-19.5997	0.823765	0.0675854	0.668134	NotSig	0.196012	negligible	33.4877	33.2089	33.7666	0.268965	0.00851867	1.01679	0.993203	0.996941	Not Sig	nonsignificant	adaptor related protein complex 3 subunit beta 2 [Source:RGD Symbol;Acc:1308950]
Gsta1	chr9	278	236	71.3875	79.5157	8.12825	1.11386	0.0673959	0.668134	NotSig	-0.128216	negligible	71.1288	58.7386	83.519	0.204203	2.50484	1.42188	0.0122507	0.113319	Not Sig	nonsignificant	glutathione S-transferase alpha 1 [Source:RGD Symbol;Acc:2753]
Abhd3	chr18	208	188	86.146	97.8551	11.7091	1.13592	0.0686269	0.671111	NotSig	-0.159401	negligible	48.8262	41.6651	55.9874	0.238689	1.54498	1.34375	0.122352	0.378839	Not Sig	nonsignificant	abhydrolase domain containing 3, phospholipase [Source:RGD Symbol;Acc:1310655]
Ap2m1	chr11	439	533	84.9509	91.4395	6.48861	1.07638	0.0700001	0.675092	NotSig	-0.12878	negligible	128.979	135.689	122.269	0.169267	-0.832737	0.901101	0.404993	0.679067	Not Sig	nonsignificant	adaptor related protein complex 2 subunit mu 1 [Source:RGD Symbol;Acc:620135]
Cplx2	chr17	873	1194	81.5223	87.807	6.28476	1.07709	0.0700995	0.675092	NotSig	-0.0915966	negligible	39.7357	57.807	21.6643	0.297842	-4.78997	0.37477	1.66807e-06	0.00138867	FDR<0.05	downregulated	complexin 2 [Source:RGD Symbol;Acc:70945]
Dynlrb1	chr3	365	369	58.9077	64.9955	6.08784	1.10335	0.0703463	0.675092	NotSig	-0.101475	negligible	96.5434	90.4522	102.635	0.174002	1.05473	1.13468	0.291549	0.599295	Not Sig	nonsignificant	dynein light chain roadblock-type 1 [Source:RGD Symbol;Acc:619910]
Gnai2	chr8	351	354	61.1742	67.9985	6.82431	1.11156	0.0704158	0.675092	NotSig	-0.163903	negligible	97.0156	90.2225	103.809	0.173299	1.12147	1.15058	0.262087	0.575124	Not Sig	nonsignificant	G protein subunit alpha i2 [Source:RGD Symbol;Acc:620243]
Trim8	chr1	178	191	64.7282	74.8657	10.1375	1.15662	0.0710721	0.677088	NotSig	-0.17224	negligible	31.9642	31.5308	32.3976	0.294084	0.174445	1.02749	0.861516	0.938941	Not Sig	nonsignificant	tripartite motif-containing 8 [Source:RGD Symbol;Acc:1585223]
Cplx1	chr14	230	255	114.529	125.651	11.122	1.09711	0.0713605	0.677088	NotSig	-0.149718	negligible	44.3814	47.0385	41.7243	0.270049	-0.612291	0.887025	0.540345	0.779526	Not Sig	nonsignificant
Serp2	chr15	118	131	68.1561	81.1472	12.9911	1.19061	0.0721162	0.677088	NotSig	-0.181915	negligible	31.7362	31.4136	32.0588	0.267686	0.0740387	1.02054	0.94098	0.97405	Not Sig	nonsignificant	stress-associated endoplasmic reticulum protein family member 2 [Source:RGD Symbol;Acc:1566076]
Gabbr1	chr20	1593	1685	75.3774	78.9529	3.57545	1.04743	0.0710026	0.677088	NotSig	-0.0408386	negligible	211.745	207.664	215.825	0.170463	0.3315	1.0393	0.740267	0.882912	Not Sig	nonsignificant	gamma-aminobutyric acid type B receptor subunit 1 [Source:RGD Symbol;Acc:621537]
Map1lc3a	chr3	526	567	74.9362	80.0296	5.09336	1.06797	0.0716804	0.677088	NotSig	-0.0985067	negligible	141.504	135.401	147.608	0.155834	0.772117	1.09015	0.440045	0.696704	Not Sig	nonsignificant	microtubule-associated protein 1 light chain 3 alpha [Source:RGD Symbol;Acc:735183]
Atxn10	chr7	145	153	88.9164	100.965	12.049	1.13551	0.0711701	0.677088	NotSig	-0.208902	small	40.9315	40.0166	41.8463	0.240555	0.402787	1.04572	0.687105	0.85825	Not Sig	nonsignificant	ataxin 10 [Source:RGD Symbol;Acc:621813]
Idh3g	chrX	133	142	87.8689	102.771	14.9022	1.1696	0.0709773	0.677088	NotSig	-0.271778	small	37.2768	34.2247	40.3288	0.250155	1.00381	1.17835	0.315469	0.613339	Not Sig	nonsignificant	isocitrate dehydrogenase (NAD(+)) 3 non-catalytic subunit gamma [Source:RGD Symbol;Acc:2863]
Timp2	chr10	390	408	77.6751	83.7227	6.04763	1.07786	0.072678	0.678328	NotSig	-0.0584365	negligible	49.9684	53.7622	46.1747	0.254883	-0.946822	0.858869	0.343729	0.633085	Not Sig	nonsignificant	TIMP metallopeptidase inhibitor 2 [Source:RGD Symbol;Acc:61312]
Rpl23a	chr10	1236	1061	42.1465	44.496	2.34951	1.05575	0.0730794	0.680066	NotSig	-0.071432	negligible	129.22	106.003	152.437	0.366456	1.44554	1.43804	0.148306	0.422824	Not Sig	nonsignificant	ribosomal protein L23A [Source:RGD Symbol;Acc:1304897]
Hsp90ab1	chr9	1186	1621	73.151	77.0201	3.86914	1.05289	0.0732928	0.680066	NotSig	-0.0729153	negligible	356.982	398.296	315.667	0.126214	-2.59967	0.792544	0.00933139	0.108779	Not Sig	nonsignificant	heat shock protein 90 alpha family class B member 1 [Source:RGD Symbol;Acc:1303075]
Arf5	chr4	419	409	74.6007	81.1785	6.5778	1.08817	0.0737489	0.681666	NotSig	-0.125302	negligible	101.503	90.6259	112.381	0.177359	1.64103	1.24005	0.100791	0.345302	Not Sig	nonsignificant	ADP-ribosylation factor 5 [Source:RGD Symbol;Acc:621278]
Htra1	chr1	356	339	68.3335	63.8015	-4.53206	0.933677	0.0740391	0.68182	NotSig	0.109655	negligible	87.5509	81.8285	93.2733	0.193052	0.961842	1.13986	0.336129	0.628825	Not Sig	nonsignificant	HtrA serine peptidase 1 [Source:RGD Symbol;Acc:69235]
Arhgdia	chr10	391	415	76.5212	82.9325	6.41131	1.08378	0.0740575	0.68182	NotSig	-0.124955	negligible	71.0596	72.8142	69.3049	0.203493	-0.373354	0.951805	0.708885	0.870021	Not Sig	nonsignificant	Rho GDP dissociation inhibitor alpha [Source:RGD Symbol;Acc:1359547]
Uchl1	chr14	426	591	89.3474	96.5068	7.15936	1.08013	0.0740559	0.68182	NotSig	-0.0993372	negligible	135.26	152.511	118.01	0.202615	-1.74274	0.773779	0.0813793	0.303804	Not Sig	nonsignificant	ubiquitin C-terminal hydrolase L1 [Source:RGD Symbol;Acc:3928]
Rgs10	chr1	112	120	77.7573	90.4832	12.726	1.16366	0.0751566	0.682134	NotSig	-0.287326	small	29.3971	28.5378	30.2563	0.276725	0.269987	1.06022	0.787171	0.900783	Not Sig	nonsignificant	regulator of G-protein signaling 10 [Source:RGD Symbol;Acc:3562]
Atp1b1	chr13	2153	2715	99.0837	103.701	4.6171	1.0466	0.0742565	0.682134	NotSig	-0.0496488	negligible	355.221	401.659	308.782	0.162319	-2.34816	0.768766	0.0188663	0.143547	Not Sig	nonsignificant	ATPase Na+/K+ transporting subunit beta 1 [Source:RGD Symbol;Acc:2170]
Fa2h	chr19	120	138	88.9666	102.729	13.7625	1.15469	0.0752475	0.682134	NotSig	-0.238867	small	24.8577	26.7424	22.973	0.300633	-0.59013	0.85905	0.555104	0.790631	Not Sig	nonsignificant	fatty acid 2-hydroxylase [Source:RGD Symbol;Acc:1310347]
Id3	chr5	83	104	53.7123	71.1304	17.418	1.32428	0.0757665	0.682401	NotSig	-0.270598	small	26.0816	26.7052	25.4579	0.28738	-0.151127	0.953295	0.879876	0.942724	Not Sig	nonsignificant	inhibitor of DNA binding 3 [Source:RGD Symbol;Acc:2860]
Rps16	chr1	1478	1174	55.7807	58.242	2.46127	1.04412	0.0765627	0.682947	NotSig	-0.064749	negligible	339.405	277.492	401.318	0.168671	3.16198	1.44623	0.00156702	0.0427721	FDR<0.05	nonsignificant	ribosomal protein S16 [Source:RGD Symbol;Acc:621031]
Cmtm5	chr15	295	242	52.3475	60.6926	8.34509	1.15942	0.0764849	0.682947	NotSig	-0.176238	negligible	74.2698	61.1077	87.432	0.196005	2.73661	1.43078	0.00620757	0.0922821	Not Sig	nonsignificant	CKLF-like MARVEL transmembrane domain containing 5 [Source:RGD Symbol;Acc:1307045]
Isca1	chr17	252	242	69.0105	78.0969	9.08643	1.13167	0.0771194	0.682947	NotSig	-0.1576	negligible	39.5836	36.3901	42.7771	0.245945	0.933353	1.17552	0.350638	0.639443	Not Sig	nonsignificant	iron-sulfur cluster assembly 1 [Source:RGD Symbol;Acc:727792]
Csnk1a1	chr18	172	203	85.6323	104.983	19.351	1.22598	0.0772561	0.682947	NotSig	-0.166671	negligible	28.9331	33.4061	24.4601	0.311623	-1.44239	0.732206	0.149193	0.423901	Not Sig	nonsignificant	casein kinase 1, alpha 1 [Source:RGD Symbol;Acc:71098]
Agpat3	chr20	353	316	92.6981	102.367	9.66856	1.1043	0.0774722	0.682947	NotSig	-0.126996	negligible	33.9333	32.0732	35.7934	0.257365	0.628609	1.11599	0.529605	0.770798	Not Sig	nonsignificant	1-acylglycerol-3-phosphate O-acyltransferase 3 [Source:RGD Symbol;Acc:1305787]
Atp6v1g1	chr5	274	286	58.5175	64.6523	6.13481	1.10484	0.0776152	0.682947	NotSig	-0.0914362	negligible	41.4041	36.7669	46.0412	0.24942	1.16397	1.25225	0.244436	0.565259	Not Sig	nonsignificant	ATPase H+ transporting V1 subunit G1 [Source:RGD Symbol;Acc:1310088]
Gde1	chr1	493	508	92.661	100.537	7.87638	1.085	0.0779918	0.683573	NotSig	-0.0928236	negligible	132.035	122.451	141.619	0.164349	1.34727	1.15654	0.177893	0.473149	Not Sig	nonsignificant	glycerophosphodiester phosphodiesterase 1 [Source:RGD Symbol;Acc:621788]
Gfap	chr10	2765	2329	82.5539	85.217	2.66313	1.03226	0.0789973	0.684223	NotSig	-0.0410259	negligible	552.768	485.025	620.512	0.133469	2.68688	1.27934	0.00721234	0.0976305	Not Sig	nonsignificant	glial fibrillary acidic protein [Source:RGD Symbol;Acc:2679]
Prdx6	chr13	472	392	60.6874	65.9699	5.28246	1.08704	0.0789074	0.684223	NotSig	-0.0563859	negligible	78.0421	66.3144	89.7697	0.199432	2.17081	1.3537	0.0299452	0.176804	Not Sig	nonsignificant	peroxiredoxin 6 [Source:RGD Symbol;Acc:71005]
Rps3a	chr2	802	675	48.2344	50.9439	2.70943	1.05617	0.0787245	0.684223	NotSig	-0.0481211	negligible	177.723	149.048	206.398	0.216758	2.23891	1.38477	0.0251618	0.160515	Not Sig	nonsignificant	ribosomal protein S3a [Source:RGD Symbol;Acc:62078]
Ssb	chr3	94	128	112.919	86.424	-26.495	0.765363	0.0790188	0.684223	NotSig	0.233581	small	27.4136	29.1487	25.6785	0.286262	-0.783591	0.880948	0.43328	0.693909	Not Sig	nonsignificant	small RNA binding exonuclease protection factor La [Source:RGD Symbol;Acc:620804]
Fbxo2	chr5	226	167	72.9233	80.0151	7.09178	1.09725	0.0789525	0.684223	NotSig	-0.125724	negligible	52.7707	42.7345	62.8068	0.226969	2.51642	1.4697	0.0118555	0.112221	Not Sig	nonsignificant	F-box protein 2 [Source:RGD Symbol;Acc:621751]
Uqcr11	chr7	997	935	84.3412	88.8282	4.487	1.0532	0.0784358	0.684223	NotSig	-0.071052	negligible	232.494	209.129	255.86	0.144507	2.08356	1.22346	0.0372003	0.203694	Not Sig	nonsignificant	ubiquinol-cytochrome c reductase, complex III subunit XI [Source:RGD Symbol;Acc:1590985]
Rab11b	chr7	232	243	74.8627	83.0652	8.20252	1.10957	0.0793004	0.684442	NotSig	-0.182884	negligible	60.9084	59.3367	62.48	0.200839	0.381108	1.05297	0.703123	0.867186	Not Sig	nonsignificant	RAB11B, member RAS oncogene family [Source:RGD Symbol;Acc:68369]
Mobp	chr8	7204	5616	89.0966	91.1232	2.0266	1.02275	0.0792644	0.684442	NotSig	-0.0218887	negligible	882.335	761.352	1003.32	0.118552	3.34551	1.31781	0.000821307	0.029575	FDR<0.05	nonsignificant	myelin-associated oligodendrocyte basic protein [Source:RGD Symbol;Acc:3101]
Phyhip	chr15	298	389	96.3152	108.615	12.3002	1.12771	0.0798466	0.685184	NotSig	-0.140781	negligible	44.7954	55.9477	33.6432	0.290065	-2.55365	0.601333	0.01066	0.111628	Not Sig	nonsignificant	phytanoyl-CoA 2-hydroxylase interacting protein [Source:RGD Symbol;Acc:1305790]
Atp1a1	chr2	441	487	96.2251	107.352	11.1271	1.11564	0.0797648	0.685184	NotSig	-0.107899	negligible	119.667	116.142	123.192	0.162854	0.373905	1.0607	0.708475	0.870021	Not Sig	nonsignificant	ATPase Na+/K+ transporting subunit alpha 1 [Source:RGD Symbol;Acc:2167]
Ubac2	chr15	149	169	69.4243	77.8166	8.39238	1.12089	0.0808014	0.687332	NotSig	-0.167502	negligible	36.8306	36.5898	37.0714	0.258041	0.114748	1.01316	0.908645	0.956317	Not Sig	nonsignificant	UBA domain containing 2 [Source:RGD Symbol;Acc:1311689]
Ctdnep1	chr10	133	129	63.5754	76.666	13.0907	1.20591	0.0816956	0.687689	NotSig	-0.158249	negligible	33.3988	30.5721	36.2254	0.261121	0.919321	1.18491	0.357928	0.641666	Not Sig	nonsignificant	CTD nuclear envelope phosphatase 1 [Source:RGD Symbol;Acc:1310172]
Agt	chr19	576	546	56.4835	61.4737	4.99021	1.08835	0.0821093	0.687689	NotSig	-0.117378	negligible	151.093	133.87	168.317	0.172271	1.95627	1.25732	0.0504339	0.229433	Not Sig	nonsignificant	angiotensinogen [Source:RGD Symbol;Acc:2069]
Rps27	chr2	1211	984	50.6627	53.5309	2.86825	1.05661	0.0823137	0.687689	NotSig	-0.0807882	negligible	219.524	176.774	262.274	0.19682	2.93128	1.48367	0.00337567	0.0653546	Not Sig	nonsignificant	ribosomal protein S27 [Source:RGD Symbol;Acc:621045]
Ran	chr12	176	193	69.7963	79.536	9.73971	1.13954	0.0830912	0.688449	NotSig	-0.142297	negligible	47.6535	45.9668	49.3401	0.224339	0.438659	1.07338	0.660909	0.846472	Not Sig	nonsignificant	RAN, member RAS oncogene family [Source:RGD Symbol;Acc:620367]
Ddn	chr7	849	938	111.667	118.401	6.73399	1.0603	0.0827746	0.688449	NotSig	-0.0825796	negligible	67.0119	83.1086	50.9152	0.203665	-3.50082	0.612634	0.000463821	0.0234019	FDR<0.05	nonsignificant	dendrin [Source:RGD Symbol;Acc:2497]
Git1	chr10	302	450	82.8581	79.5615	-3.29666	0.960213	0.0844487	0.694549	NotSig	0.129392	negligible	82.7832	99.6748	65.8916	0.187248	-3.12242	0.661065	0.0017937	0.047405	FDR<0.05	nonsignificant	GIT ArfGAP 1 [Source:RGD Symbol;Acc:69331]
LOC100364457	chr1	911	758	48.4872	51.3119	2.82476	1.05826	0.0856276	0.697924	NotSig	-0.0459418	negligible	219.714	181.799	257.629	0.185739	2.74	1.41711	0.0061439	0.0921585	Not Sig	nonsignificant
Uqcrh	chr5	487	456	58.9944	64.125	5.1306	1.08697	0.085377	0.697924	NotSig	-0.0781977	negligible	125.279	112.003	138.555	0.158539	2.04042	1.23706	0.0413082	0.210789	Not Sig	nonsignificant	ubiquinol-cytochrome c reductase hinge protein [Source:RGD Symbol;Acc:1305987]
Sdhd	chr8	130	119	61.4447	73.632	12.1873	1.19835	0.0855622	0.697924	NotSig	-0.209285	small	29.6056	26.0466	33.1646	0.274424	1.38486	1.27328	0.166094	0.451137	Not Sig	nonsignificant	succinate dehydrogenase complex subunit D [Source:RGD Symbol;Acc:735231]
Cdipt	chr1	210	200	81.6962	91.8716	10.1754	1.12455	0.085791	0.698015	NotSig	-0.143156	negligible	49.7992	46.5678	53.0306	0.218409	0.788446	1.13878	0.430436	0.693909	Not Sig	nonsignificant	CDP-diacylglycerol--inositol 3-phosphatidyltransferase [Source:RGD Symbol;Acc:620576]
Ppp6r1	chr1	134	132	98.4223	83.628	-14.7942	0.849686	0.0863033	0.698052	NotSig	0.199462	negligible	25.3291	25.8955	24.7627	0.29025	-0.118132	0.956255	0.905963	0.954098	Not Sig	nonsignificant	protein phosphatase 6, regulatory subunit 1 [Source:RGD Symbol;Acc:1311409]
Sec61g	chr14	220	198	47.5971	52.7061	5.10896	1.10734	0.08656	0.69849	NotSig	-0.161212	negligible	35.0226	31.0628	38.9824	0.282258	1.24352	1.25496	0.213675	0.521487	Not Sig	nonsignificant	Sec61 translocon subunit gamma [Source:RGD Symbol;Acc:1596170]
Adcy2	chr1	163	134	78.0405	91.5225	13.4821	1.17276	0.0868459	0.698879	NotSig	-0.211946	small	37.0359	32.2879	41.7839	0.252973	1.26686	1.2941	0.205205	0.511476	Not Sig	nonsignificant	adenylate cyclase 2 [Source:RGD Symbol;Acc:619965]
Fabp5	chr2	315	257	66.0681	73.2348	7.16672	1.10847	0.0870697	0.699015	NotSig	-0.148569	negligible	74.8837	61.3797	88.3878	0.185904	2.91027	1.44002	0.00361116	0.0683248	Not Sig	nonsignificant	fatty acid binding protein 5 [Source:RGD Symbol;Acc:70997]
Rab5c	chr10	175	166	73.0521	82.2511	9.19906	1.12592	0.0872403	0.699686	NotSig	-0.123344	negligible	31.5951	29.3459	33.8444	0.282286	0.516731	1.15329	0.605344	0.817435	Not Sig	nonsignificant	RAB5C, member RAS oncogene family [Source:RGD Symbol;Acc:1307095]
Ndufa11	chr9	326	313	57.0356	61.888	4.85235	1.08508	0.0874124	0.70031	NotSig	-0.135297	negligible	85.4877	77.0212	93.9541	0.198923	1.48632	1.21985	0.137196	0.409374	Not Sig	nonsignificant	NADH:ubiquinone oxidoreductase subunit A11 [Source:RGD Symbol;Acc:1303292]
Cox4i1	chr19	1714	1623	66.9086	69.0153	2.10671	1.03149	0.0893814	0.704859	NotSig	-0.0648823	negligible	433.656	378.327	488.984	0.137148	2.68331	1.29249	0.00728973	0.0978822	Not Sig	nonsignificant	cytochrome c oxidase subunit 4i1 [Source:RGD Symbol;Acc:68374]
LOC100911992	chr2	939	749	64.666	69.4179	4.75192	1.07348	0.0894415	0.704859	NotSig	-0.0810124	negligible	228.983	182.555	275.411	0.185986	3.19791	1.50865	0.00138425	0.0397376	FDR<0.05	nonsignificant
Ptp4a2	chr5	159	153	68.5045	81.1319	12.6274	1.18433	0.0905844	0.704859	NotSig	-0.213689	small	33.861	31.5183	36.2037	0.269529	0.759666	1.14866	0.447454	0.698648	Not Sig	nonsignificant	protein tyrosine phosphatase 4A2 [Source:RGD Symbol;Acc:619786]
Tuba4a	chr9	466	663	69.3846	74.7871	5.40256	1.07786	0.0899278	0.704859	NotSig	-0.0813669	negligible	116.559	139.669	93.4499	0.169709	-3.38769	0.669083	0.000704836	0.0286232	FDR<0.05	nonsignificant	tubulin, alpha 4A [Source:RGD Symbol;Acc:1359623]
Ucp2	chr1	133	126	59.4032	67.1252	7.72202	1.12999	0.0920663	0.706407	NotSig	-0.149528	negligible	37.1388	32.9028	41.3749	0.27842	1.18864	1.25749	0.234581	0.553226	Not Sig	nonsignificant	uncoupling protein 2 [Source:RGD Symbol;Acc:3932]
Septin5	chr11	682	809	95.7527	101.376	5.62306	1.05872	0.0920628	0.706407	NotSig	-0.0884136	negligible	58.4582	70.6283	46.2882	0.239669	-2.54206	0.655377	0.0110201	0.112221	Not Sig	nonsignificant	septin 5 [Source:RGD Symbol;Acc:621763]
LOC361985	chr2	122	100	82.4458	69.0703	-13.3755	0.837767	0.0931178	0.707672	NotSig	0.0873409	negligible	26.266	23.2609	29.271	0.289605	1.14271	1.25838	0.25316	0.56961	Not Sig	nonsignificant
Atp5if1	chr5	314	324	60.7252	65.6577	4.93258	1.08123	0.0933825	0.707672	NotSig	-0.0653683	negligible	84.3819	81.0773	87.6864	0.17621	0.616731	1.08152	0.537412	0.77808	Not Sig	nonsignificant	ATP synthase inhibitory factor subunit 1 [Source:RGD Symbol;Acc:2181]
Mt1	chr19	175	134	54.697	62.3292	7.63225	1.13954	0.097285	0.716868	NotSig	-0.16488	negligible	25.7023	21.5103	29.8943	0.335787	1.60549	1.38977	0.108387	0.361656	Not Sig	nonsignificant	metallothionein 1 [Source:RGD Symbol;Acc:3117]
Elmo2	chr3	97	141	111.178	92.5329	-18.6452	0.832294	0.0972462	0.716868	NotSig	0.224333	small	25.8112	31.9661	19.6564	0.317224	-2.01792	0.614913	0.0435998	0.214774	Not Sig	nonsignificant	engulfment and cell motility 2 [Source:RGD Symbol;Acc:1305784]
Arpc2	chr9	260	294	67.8691	77.4133	9.54422	1.14063	0.0984899	0.718477	NotSig	-0.0669963	negligible	73.7435	71.8451	75.6419	0.200305	0.533185	1.05285	0.593906	0.814528	Not Sig	nonsignificant	actin related protein 2/3 complex, subunit 2 [Source:RGD Symbol;Acc:1305848]
Zfr	chr2	133	252	85.2104	100.51	15.2999	1.17955	0.0996704	0.71981	NotSig	-0.14101	negligible	39.0059	48.9798	29.032	0.250953	-2.93947	0.592734	0.00328773	0.0644009	Not Sig	nonsignificant	zinc finger RNA binding protein [Source:RGD Symbol;Acc:1311890]
LOC108352861	chr14	842	749	39.8621	41.8684	2.00631	1.05033	0.099862	0.720149	NotSig	-0.0495154	negligible	195.238	169.903	220.573	0.171531	2.2632	1.29823	0.0236236	0.155468	Not Sig	nonsignificant	40S ribosomal protein S28 pseudogene [Source:RGD Symbol;Acc:11455995]
B3gat3	chr1	300	274	82.8839	90.7962	7.91232	1.09546	0.100816	0.72129	NotSig	-0.119932	negligible	74.2327	64.0861	84.3792	0.194134	1.84	1.31665	0.0657684	0.26976	Not Sig	nonsignificant	beta-1,3-glucuronyltransferase 3 [Source:RGD Symbol;Acc:1311968]
Cacna1a	chr19	122	147	98.9176	87.859	-11.0586	0.888204	0.100758	0.72129	NotSig	0.171754	negligible	30.8971	33.3596	28.4346	0.296338	-0.63058	0.852368	0.528315	0.769852	Not Sig	nonsignificant	calcium voltage-gated channel subunit alpha1 A [Source:RGD Symbol;Acc:2244]
LOC100362366	chr3	160	160	40.4301	45.4855	5.05541	1.12504	0.100364	0.72129	NotSig	-0.147537	negligible	79.014	65.1761	92.852	0.255261	2.04413	1.42463	0.0409407	0.21039	Not Sig	nonsignificant	40S ribosomal protein S17-like [Source:RGD Symbol;Acc:2318320]
LOC100361933	chr17	315	260	48.8565	52.8642	4.00769	1.08203	0.101669	0.722308	NotSig	-0.148579	negligible	102.109	81.6481	122.57	0.211622	2.83409	1.5012	0.0045957	0.0772914	Not Sig	nonsignificant	ribosomal protein S12-like [Source:RGD Symbol;Acc:2319147]
Hm13	chr3	118	141	90.1419	80.6958	-9.44607	0.895209	0.102261	0.722974	NotSig	0.190803	negligible	30.5049	31.9825	29.0273	0.278156	-0.385871	0.907602	0.699592	0.866015	Not Sig	nonsignificant	histocompatibility minor 13 [Source:RGD Symbol;Acc:1308946]
Mgll	chr4	251	242	77.8071	85.0268	7.21977	1.09279	0.102628	0.722974	NotSig	-0.138171	negligible	30.9788	30.0718	31.8857	0.269475	0.358763	1.06032	0.719772	0.873484	Not Sig	nonsignificant	monoglyceride lipase [Source:RGD Symbol;Acc:71039]
Pde2a	chr1	242	241	106.681	94.0775	-12.6038	0.881855	0.103299	0.723623	NotSig	0.120163	negligible	52.3232	50.1594	54.487	0.218564	0.519499	1.08628	0.603413	0.816815	Not Sig	nonsignificant	phosphodiesterase 2A [Source:RGD Symbol;Acc:620965]
St3gal5	chr4	236	214	80.144	87.5411	7.39707	1.0923	0.102965	0.723623	NotSig	-0.162291	negligible	41.4342	38.6082	44.2602	0.246277	0.740571	1.14639	0.458954	0.710255	Not Sig	nonsignificant	ST3 beta-galactoside alpha-2,3-sialyltransferase 5 [Source:RGD Symbol;Acc:620875]
Cntn1	chr7	432	492	92.2853	100.077	7.7916	1.08443	0.103079	0.723623	NotSig	-0.100666	negligible	62.7279	75.4322	50.0237	0.231333	-2.54766	0.663161	0.0108447	0.112221	Not Sig	nonsignificant	contactin 1 [Source:RGD Symbol;Acc:621300]
Fdx2	chr8	91	107	59.7456	70.5311	10.7855	1.18052	0.103334	0.723623	NotSig	-0.181597	negligible	25.0086	24.0988	25.9184	0.290212	0.404958	1.0755	0.685508	0.85825	Not Sig	nonsignificant	ferredoxin 2 [Source:RGD Symbol;Acc:1561264]
Strn4	chr1	139	212	78.3032	92.6317	14.3285	1.18299	0.104109	0.724726	NotSig	-0.147191	negligible	45.2525	51.2444	39.2606	0.234641	-1.58887	0.766144	0.11209	0.368105	Not Sig	nonsignificant	striatin 4 [Source:RGD Symbol;Acc:1307030]
Ctss	chr2	583	574	71.5916	75.0881	3.49646	1.04884	0.104614	0.724985	NotSig	-0.0919282	negligible	161.205	144.364	178.046	0.170952	1.78383	1.23332	0.0744512	0.286616	Not Sig	nonsignificant	cathepsin S [Source:RGD Symbol;Acc:621513]
LOC100362830	chr5	741	681	42.3411	44.7794	2.43829	1.05759	0.104504	0.724985	NotSig	-0.0627889	negligible	352.589	309.757	395.421	0.154188	2.31992	1.27655	0.0203453	0.149889	Not Sig	nonsignificant
Ndufb10	chr10	139	141	68.1731	77.0671	8.89401	1.13046	0.105358	0.725614	NotSig	-0.217503	small	36.1188	31.7284	40.5092	0.264604	1.28761	1.27675	0.197882	0.50072	Not Sig	nonsignificant	NADH:ubiquinone oxidoreductase subunit B10 [Source:RGD Symbol;Acc:1310782]
Gng13	chr10	186	131	68.55	77.1884	8.63833	1.12602	0.106074	0.725614	NotSig	-0.229882	small	40.7394	29.413	52.0658	0.252868	3.32106	1.77016	0.000896756	0.0305949	FDR<0.05	nonsignificant	G protein subunit gamma 13 [Source:RGD Symbol;Acc:1593806]
Ndrg3	chr3	189	193	81.093	94.6098	13.5168	1.16668	0.105813	0.725614	NotSig	-0.166882	negligible	34.7289	35.1946	34.2632	0.280342	-0.155745	0.973535	0.876234	0.942538	Not Sig	nonsignificant
Eif3i	chr5	118	129	58.1414	69.1543	11.0129	1.18942	0.105447	0.725614	NotSig	-0.208516	small	33.8736	33.4229	34.3242	0.272385	0.246815	1.02697	0.805051	0.910584	Not Sig	nonsignificant	eukaryotic translation initiation factor 3, subunit I [Source:RGD Symbol;Acc:1584560]
LOC100360087	chr5	568	512	55.2464	57.8679	2.62153	1.04745	0.105954	0.725614	NotSig	-0.0608275	negligible	113.964	107.64	120.288	0.174202	1.0283	1.11751	0.30381	0.609294	Not Sig	nonsignificant	ferritin light chain 1-like [Source:RGD Symbol;Acc:2322860]
Hcn2	chr7	159	175	78.8866	88.7711	9.88446	1.1253	0.105902	0.725614	NotSig	-0.208455	small	35.5262	36.3539	34.6985	0.254801	-0.227581	0.954465	0.819972	0.91738	Not Sig	nonsignificant	hyperpolarization activated cyclic nucleotide gated potassium and sodium channel 2 [Source:RGD Symbol;Acc:620689]
Lrpap1	chr14	140	134	70.9228	81.6229	10.7001	1.15087	0.107429	0.729285	NotSig	-0.136725	negligible	28.4134	24.7266	32.1003	0.288768	1.29665	1.29821	0.194752	0.498099	Not Sig	nonsignificant	LDL receptor related protein associated protein 1 [Source:RGD Symbol;Acc:620700]
Lgi3	chr15	152	183	85.0439	96.1539	11.1099	1.13064	0.107104	0.729285	NotSig	-0.166773	negligible	27.5528	30.9967	24.1089	0.289847	-1.29822	0.77779	0.194211	0.498099	Not Sig	nonsignificant	leucine-rich repeat LGI family, member 3 [Source:RGD Symbol;Acc:1311079]
Slc1a3	chr2	829	834	118.954	126.096	7.14183	1.06004	0.108391	0.72976	NotSig	-0.0682059	negligible	144.256	147.45	141.062	0.165199	-0.416355	0.956674	0.67715	0.855065	Not Sig	nonsignificant	solute carrier family 1 member 3 [Source:RGD Symbol;Acc:3698]
Eif5a	chr10	483	465	63.1678	67.3481	4.18027	1.06618	0.109775	0.730901	NotSig	-0.137872	negligible	123.059	108.693	137.426	0.16969	1.85435	1.26436	0.0636888	0.265105	Not Sig	nonsignificant	eukaryotic translation initiation factor 5A [Source:RGD Symbol;Acc:1308029]
Park7	chr5	253	239	78.8936	73.5745	-5.31919	0.932578	0.109277	0.730901	NotSig	0.145794	negligible	66.3106	60.9102	71.711	0.218736	1.12634	1.17732	0.260021	0.574185	Not Sig	nonsignificant	Parkinsonism associated deglycase [Source:RGD Symbol;Acc:621808]
Hba-a3	chr10	756	571	39.7157	38.1392	-1.57651	0.960305	0.110545	0.731399	NotSig	0.0745009	negligible	205.74	170.868	240.611	0.631521	0.787602	1.40817	0.43093	0.693909	Not Sig	nonsignificant	hemoglobin alpha, adult chain 3 [Source:RGD Symbol;Acc:1359209]
Rpl17	chr18	896	684	52.9547	55.9186	2.96386	1.05597	0.110251	0.731399	NotSig	-0.0600408	negligible	28.427	19.2044	37.6495	0.311863	3.11676	1.96046	0.0018285	0.0475695	FDR<0.05	nonsignificant	ribosomal protein L17 [Source:RGD Symbol;Acc:1303019]
S100a1	chr2	133	100	78.0606	69.6318	-8.42882	0.892022	0.110149	0.731399	NotSig	0.202668	small	32.4444	24.9741	39.9147	0.300421	2.26875	1.59824	0.0232833	0.155468	Not Sig	nonsignificant	S100 calcium binding protein A1 [Source:RGD Symbol;Acc:3614]
Lmo4	chr2	121	156	67.6602	78.8889	11.2288	1.16596	0.110785	0.731399	NotSig	-0.128749	negligible	33.7872	37.1107	30.4636	0.271283	-0.972697	0.820884	0.330704	0.626706	Not Sig	nonsignificant	LIM domain only 4 [Source:RGD Symbol;Acc:1305670]
Tcea2	chr3	112	104	91.3597	80.2073	-11.1524	0.877929	0.110699	0.731399	NotSig	0.153684	negligible	27.9804	26.3028	29.6579	0.300678	0.755161	1.12756	0.450153	0.699817	Not Sig	nonsignificant	transcription elongation factor A2 [Source:RGD Symbol;Acc:61825]
Evl	chr6	142	155	67.922	78.7483	10.8263	1.15939	0.110907	0.731696	NotSig	-0.223158	small	35.4331	32.6521	38.2141	0.261347	0.641593	1.17034	0.521138	0.764488	Not Sig	nonsignificant	Enah/Vasp-like [Source:RGD Symbol;Acc:621150]
Rab18	chr17	135	134	68.9805	80.4561	11.4756	1.16636	0.111427	0.733597	NotSig	-0.174351	negligible	30.9027	31.2597	30.5457	0.272206	0.108363	0.977159	0.913708	0.959672	Not Sig	nonsignificant	RAB18, member RAS oncogene family [Source:RGD Symbol;Acc:1308905]
Cyfip2	chr10	326	495	103.443	95.7891	-7.65346	0.926012	0.111614	0.733814	NotSig	0.117823	negligible	59.5167	77.8893	41.1442	0.238683	-3.7382	0.52824	0.00018534	0.0162417	FDR<0.05	nonsignificant	cytoplasmic FMR1 interacting protein 2 [Source:RGD Symbol;Acc:1305048]
Fabp7	chr20	319	246	52.6973	59.2831	6.58577	1.12497	0.11234	0.734254	NotSig	-0.123529	negligible	72.9089	59.8605	85.9573	0.214046	2.59483	1.43596	0.0094637	0.108779	Not Sig	nonsignificant	fatty acid binding protein 7 [Source:RGD Symbol;Acc:69312]
Mtch2	chr3	123	131	72.6769	85.9197	13.2428	1.18221	0.112357	0.734254	NotSig	-0.225278	small	27.464	24.1888	30.7392	0.293827	1.06302	1.2708	0.287774	0.595896	Not Sig	nonsignificant	mitochondrial carrier 2 [Source:RGD Symbol;Acc:1308080]
LOC108350501	chr3	1123	972	54.9414	56.6055	1.66409	1.03029	0.112375	0.734254	NotSig	-0.0474768	negligible	270.53	225.037	316.023	0.158351	3.10862	1.40432	0.00187966	0.0481482	FDR<0.05	nonsignificant
Cox14	chr7	121	152	66.823	75.6273	8.8043	1.13176	0.11212	0.734254	NotSig	-0.30305	small	32.3301	31.5447	33.1155	0.32715	0.133856	1.0498	0.893517	0.952436	Not Sig	nonsignificant
Ppp1r1b	chr10	104	91	54.8721	62.4662	7.59407	1.1384	0.113034	0.734331	NotSig	-0.0804377	negligible	25.664	21.3897	29.9384	0.294199	1.6258	1.39966	0.103992	0.351926	Not Sig	nonsignificant	protein phosphatase 1, regulatory (inhibitor) subunit 1B [Source:RGD Symbol;Acc:621859]
C1ql1	chr10	151	141	70.3889	79.6567	9.26786	1.13167	0.11336	0.734331	NotSig	-0.160017	negligible	36.2699	33.7555	38.7842	0.251584	0.950804	1.14898	0.341704	0.631862	Not Sig	nonsignificant	complement C1q like 1 [Source:RGD Symbol;Acc:1306039]
Stmn2	chr2	320	409	82.637	88.9445	6.30753	1.07633	0.113148	0.734331	NotSig	-0.0757897	negligible	71.4275	78.882	63.9731	0.225859	-1.27536	0.810998	0.202182	0.506637	Not Sig	nonsignificant	stathmin 2 [Source:RGD Symbol;Acc:68947]
Rpl7	chr5	816	756	53.148	55.9221	2.77412	1.0522	0.114378	0.736178	NotSig	-0.0916219	negligible	177.171	154.997	199.346	0.177088	2.01918	1.28613	0.0434682	0.214761	Not Sig	nonsignificant
Aco2	chr7	471	481	69.9663	76.7401	6.77377	1.09681	0.11572	0.736178	NotSig	-0.0903524	negligible	80.4262	86.5564	74.2961	0.188353	-1.08644	0.858355	0.277284	0.588126	Not Sig	nonsignificant	aconitase 2 [Source:RGD Symbol;Acc:621360]
Atp5mc2	chr7	469	433	61.4962	66.0508	4.5546	1.07406	0.115148	0.736178	NotSig	-0.105915	negligible	119.476	105.795	133.157	0.18004	1.91019	1.25864	0.0561087	0.24509	Not Sig	nonsignificant	ATP synthase membrane subunit c locus 2 [Source:RGD Symbol;Acc:620051]
Rnasek	chr10	833	917	78.1108	82.5308	4.42	1.05659	0.115949	0.736412	NotSig	-0.0696406	negligible	235.424	224.767	246.082	0.134687	0.945398	1.09483	0.344456	0.633356	Not Sig	nonsignificant
Rps8	chr5	1217	1009	50.085	52.2294	2.14445	1.04282	0.117111	0.73831	NotSig	-0.060118	negligible	226.895	193.158	260.631	0.188638	2.37847	1.34931	0.0173849	0.138165	Not Sig	nonsignificant	ribosomal protein S8 [Source:RGD Symbol;Acc:61910]
Tmem9b	chr1	218	208	81.0859	88.3217	7.23585	1.08924	0.118016	0.740413	NotSig	-0.179526	negligible	50.268	46.5476	53.9884	0.219001	1.08334	1.15986	0.278657	0.589536	Not Sig	nonsignificant	TMEM9 domain family, member B [Source:RGD Symbol;Acc:1310775]
Grcc10	chr4	325	317	67.0554	72.3143	5.25891	1.07843	0.118472	0.74079	NotSig	-0.10204	negligible	80.9711	73.1734	88.7688	0.191	1.34307	1.21313	0.179249	0.475996	Not Sig	nonsignificant
Mapk8ip3	chr10	255	300	89.5873	99.0946	9.50725	1.10612	0.12601	0.741552	NotSig	-0.120309	negligible	58.0267	58.0809	57.9726	0.216085	-0.119492	0.998136	0.904885	0.953971	Not Sig	nonsignificant	mitogen-activated protein kinase 8 interacting protein 3 [Source:RGD Symbol;Acc:1563691]
Rpl19	chr10	1521	1262	48.3665	50.2605	1.89405	1.03916	0.126511	0.741552	NotSig	-0.073124	negligible	365.243	304.786	425.699	0.163134	2.98687	1.39672	0.00281848	0.0599708	Not Sig	nonsignificant	ribosomal protein L19 [Source:RGD Symbol;Acc:621183]
Gap43	chr11	184	195	63.4517	69.2598	5.80806	1.09154	0.120714	0.741552	NotSig	-0.125714	negligible	46.7519	43.7949	49.7088	0.232804	0.719696	1.13504	0.471712	0.72254	Not Sig	nonsignificant	growth associated protein 43 [Source:RGD Symbol;Acc:62071]
LOC100360508	chr13	974	844	48.8326	51.4839	2.65125	1.05429	0.120492	0.741552	NotSig	-0.107061	negligible	272.269	230.943	313.594	0.176083	2.57443	1.35788	0.0100404	0.109983	Not Sig	nonsignificant
Ccdc124	chr16	117	113	77.6303	86.8071	9.17685	1.11821	0.123734	0.741552	NotSig	-0.227168	small	28.8755	25.4941	32.2569	0.286681	0.979026	1.26527	0.327567	0.623313	Not Sig	nonsignificant	coiled-coil domain containing 124 [Source:RGD Symbol;Acc:1310931]
Camk2a	chr18	2271	3091	92.3385	94.8008	2.46231	1.02667	0.123457	0.741552	NotSig	-0.0403041	negligible	173.696	230.107	117.286	0.16903	-5.7648	0.509702	8.1757e-09	1.36125e-05	FDR<0.05	nonsignificant	calcium/calmodulin-dependent protein kinase II alpha [Source:RGD Symbol;Acc:2261]
Got2	chr19	184	307	84.6929	93.9179	9.22504	1.10892	0.126156	0.741552	NotSig	-0.152573	negligible	54.4579	67.6527	41.2631	0.249131	-2.82214	0.609925	0.00477045	0.0776147	Not Sig	nonsignificant	glutamic-oxaloacetic transaminase 2 [Source:RGD Symbol;Acc:2722]
RGD1559896	chr19	203	205	71.0027	62.5444	-8.45827	0.880874	0.123148	0.741552	NotSig	0.125098	negligible	42.9803	40.9555	45.0051	0.241025	0.584084	1.09888	0.559163	0.794846	Not Sig	nonsignificant
Fdps	chr2	155	174	75.0978	65.4297	-9.66814	0.871259	0.121646	0.741552	NotSig	0.214045	small	42.5672	40.9519	44.1825	0.247236	0.440268	1.07889	0.659743	0.846472	Not Sig	nonsignificant	farnesyl diphosphate synthase [Source:RGD Symbol;Acc:68953]
LOC100363268	chr2	164	154	60.733	70.0734	9.34039	1.15379	0.12261	0.741552	NotSig	-0.181466	negligible	56.8734	53.3438	60.403	0.21402	0.819862	1.13233	0.412295	0.683915	Not Sig	nonsignificant
Cstb	chr20	92	91	64.876	78.287	13.411	1.20672	0.121349	0.741552	NotSig	-0.179056	negligible	24.8774	23.7007	26.0541	0.297689	0.565864	1.0993	0.571486	0.798259	Not Sig	nonsignificant	cystatin B [Source:RGD Symbol;Acc:2435]
Pttg1ip	chr20	145	159	83.0692	91.5828	8.51363	1.10249	0.122702	0.741552	NotSig	-0.127244	negligible	31.1909	30.4289	31.953	0.271196	0.12577	1.05009	0.899914	0.953092	Not Sig	nonsignificant	PTTG1 interacting protein [Source:RGD Symbol;Acc:1305983]
LOC100910017	chr5	56	44	51.8925	64.4464	12.5539	1.24192	0.126544	0.741552	NotSig	-0.373845	small	51.6903	44.6234	58.7572	0.230523	1.66003	1.31674	0.0969085	0.335452	Not Sig	nonsignificant	60S ribosomal protein L31-like [Source:RGD Symbol;Acc:6500827]
Dlgap3	chr5	177	330	72.0457	67.7517	-4.29399	0.940399	0.126853	0.741552	NotSig	0.123731	negligible	54.4741	66.9886	41.9595	0.238275	-2.88236	0.626368	0.00394703	0.0738405	Not Sig	nonsignificant	DLG associated protein 3 [Source:RGD Symbol;Acc:708349]
Tst	chr7	318	230	68.6381	62.3508	-6.28739	0.908398	0.123951	0.741552	NotSig	0.130987	negligible	73.7655	57.3483	90.1826	0.20224	3.31323	1.57254	0.000922253	0.030711	FDR<0.05	nonsignificant	thiosulfate sulfurtransferase [Source:RGD Symbol;Acc:3913]
Map2k1	chr8	126	213	97.7089	107.839	10.1297	1.10367	0.126057	0.741552	NotSig	-0.164992	negligible	41.7584	48.1695	35.3473	0.240489	-1.77627	0.73381	0.0756891	0.289707	Not Sig	nonsignificant	mitogen activated protein kinase kinase 1 [Source:RGD Symbol;Acc:70495]
Uqcrc1	chr8	234	230	73.885	82.7266	8.84167	1.11967	0.122197	0.741552	NotSig	-0.178952	negligible	65.1779	60.7415	69.6143	0.204314	1.09836	1.14607	0.272049	0.585055	Not Sig	nonsignificant	ubiquinol-cytochrome c reductase core protein 1 [Source:RGD Symbol;Acc:1303314]
Plekhb2	chr9	185	217	71.9595	81.4859	9.52643	1.13239	0.119942	0.741552	NotSig	-0.0872455	negligible	30.6066	31.9299	29.2833	0.27567	-0.487686	0.917113	0.625772	0.830334	Not Sig	nonsignificant	pleckstrin homology domain containing B2 [Source:RGD Symbol;Acc:1310954]
Cracdl	chr9	119	183	68.7208	81.0346	12.3139	1.17919	0.120118	0.741552	NotSig	-0.165015	negligible	33.5949	36.3384	30.8514	0.281191	-0.919139	0.849003	0.358023	0.641666	Not Sig	nonsignificant	CRACD like [Source:RGD Symbol;Acc:1310819]
Pcsk1n	chrX	2475	2490	96.3101	99.1411	2.83103	1.02939	0.126444	0.741552	NotSig	-0.0376701	negligible	646.598	592.821	700.374	0.105666	2.26963	1.18142	0.0232297	0.155468	Not Sig	nonsignificant	proprotein convertase subtilisin/kexin type 1 inhibitor [Source:RGD Symbol;Acc:3617]
Rad23b	chr5	117	149	92.4439	80.271	-12.1729	0.868321	0.125167	0.741552	NotSig	0.208689	small	27.3642	30.9874	23.7409	0.326186	-1.01816	0.766148	0.3086	0.611536	Not Sig	nonsignificant	RAD23 homolog B, nucleotide excision repair protein [Source:RGD Symbol;Acc:1562958]
Bsg	chr7	1308	1440	70.7537	74.4277	3.67394	1.05193	0.127058	0.741625	NotSig	-0.0666264	negligible	360.847	348.708	372.986	0.126414	0.758452	1.06962	0.44818	0.698648	Not Sig	nonsignificant	basigin (Ok blood group) [Source:RGD Symbol;Acc:2220]
Sh3glb2	chr3	177	207	85.9798	98.869	12.8892	1.14991	0.128149	0.742532	NotSig	-0.128957	negligible	52.0299	50.866	53.1938	0.223033	0.434979	1.04576	0.663578	0.847283	Not Sig	nonsignificant	SH3 domain-containing GRB2-like endophilin B2 [Source:RGD Symbol;Acc:1305886]
Gabra5	chr1	167	199	68.8679	77.7179	8.85005	1.12851	0.129597	0.746012	NotSig	-0.139607	negligible	41.2848	44.8108	37.7587	0.245584	-0.996763	0.842626	0.318879	0.617365	Not Sig	nonsignificant	gamma-aminobutyric acid type A receptor subunit alpha 5 [Source:RGD Symbol;Acc:61859]
LOC100359922	chr8	186	191	45.8793	51.7716	5.89238	1.12843	0.129392	0.746012	NotSig	-0.190342	negligible	184.677	160.132	209.222	0.172891	2.28494	1.30656	0.0223163	0.155468	Not Sig	nonsignificant	60S ribosomal protein L13-like [Source:RGD Symbol;Acc:2323122]
Bex3	chrX	133	168	68.771	77.5481	8.77712	1.12763	0.130119	0.746012	NotSig	-0.0793001	negligible	37.8809	38.704	37.0578	0.251987	-0.229609	0.957467	0.818395	0.91738	Not Sig	nonsignificant	brain expressed X-linked 3 [Source:RGD Symbol;Acc:3148]
Panx2	chr7	124	176	104.983	95.6826	-9.30066	0.911408	0.130417	0.746584	NotSig	0.0765634	negligible	26.2661	31.221	21.3113	0.290111	-1.99334	0.682595	0.0462239	0.220524	Not Sig	nonsignificant	pannexin 2 [Source:RGD Symbol;Acc:735191]
Rps15al4	chr2	511	381	49.4938	52.9816	3.48777	1.07047	0.130945	0.747808	NotSig	-0.0896471	negligible	299.293	244.466	354.121	0.170235	3.17163	1.44855	0.00151586	0.0420652	FDR<0.05	nonsignificant	ribosomal protein S15A-like 4 [Source:RGD Symbol;Acc:2319559]
Mkrn1	chr4	152	169	45.6929	51.5111	5.81819	1.12733	0.132287	0.750521	NotSig	-0.12429	negligible	34.8004	35.7641	33.8367	0.285577	-0.224821	0.946108	0.822118	0.91806	Not Sig	nonsignificant	makorin ring finger protein 1 [Source:RGD Symbol;Acc:1303251]
Lmbrd1	chr9	116	163	84.4273	98.2431	13.8158	1.16364	0.132371	0.750547	NotSig	-0.145299	negligible	30.4217	34.2911	26.5522	0.275055	-1.30115	0.774317	0.193207	0.497201	Not Sig	nonsignificant	LMBR1 domain containing 1 [Source:RGD Symbol;Acc:708471]
Rpl21	chr12	1686	1423	52.72	54.4628	1.74278	1.03306	0.132963	0.751221	NotSig	-0.0474561	negligible	72.5289	60.6172	84.4406	0.244387	2.07107	1.39301	0.0383525	0.203694	Not Sig	nonsignificant	ribosomal protein L21 [Source:RGD Symbol;Acc:68390]
Pygm	chr1	122	89	65.2614	73.9335	8.67209	1.13288	0.134456	0.753114	NotSig	-0.105222	negligible	28.8302	22.2368	35.4236	0.28578	2.2653	1.59302	0.0234946	0.155468	Not Sig	nonsignificant	glycogen phosphorylase, muscle associated [Source:RGD Symbol;Acc:3461]
Mgst3	chr13	327	356	72.9149	79.4806	6.56567	1.09005	0.134553	0.753114	NotSig	-0.121153	negligible	90.4851	88.1875	92.7827	0.1861	0.546058	1.05211	0.585026	0.809981	Not Sig	nonsignificant	microsomal glutathione S-transferase 3 [Source:RGD Symbol;Acc:1306373]
Mtss2	chr19	319	329	96.0882	86.0341	-10.0541	0.895366	0.134828	0.753198	NotSig	0.0828476	negligible	43.0105	47.0897	38.9312	0.242303	-1.0571	0.826747	0.290465	0.597804	Not Sig	nonsignificant	MTSS I-BAR domain containing 2 [Source:RGD Symbol;Acc:1309731]
Add3	chr1	223	187	66.0613	75.8292	9.76792	1.14786	0.136036	0.753854	NotSig	-0.128545	negligible	33.3139	30.1263	36.5015	0.258947	0.878639	1.21162	0.379597	0.656313	Not Sig	nonsignificant	adducin 3 [Source:RGD Symbol;Acc:2043]
Cd99	chr20	180	149	74.7878	84.2	9.41211	1.12585	0.138239	0.758266	NotSig	-0.142266	negligible	39.5078	31.6083	47.4072	0.26401	2.07202	1.49983	0.0382637	0.203694	Not Sig	nonsignificant
Clip3	chr1	175	222	83.0926	94.4693	11.3767	1.13692	0.139922	0.758279	NotSig	-0.097958	negligible	26.0393	29.9214	22.1572	0.348735	-1.23286	0.740511	0.217626	0.527435	Not Sig	nonsignificant	CAP-GLY domain containing linker protein 3 [Source:RGD Symbol;Acc:1306245]
Becn1	chr10	95	108	68.004	79.9522	11.9483	1.1757	0.139545	0.758279	NotSig	-0.26776	small	27.3441	27.7366	26.9516	0.280769	-0.109282	0.9717	0.912979	0.959666	Not Sig	nonsignificant	beclin 1 [Source:RGD Symbol;Acc:620190]
Ppp1r2	chr11	134	167	96.6531	85.3096	-11.3434	0.882638	0.14017	0.758279	NotSig	0.197633	negligible	32.0307	33.212	30.8494	0.275651	-0.462258	0.928862	0.643897	0.84207	Not Sig	nonsignificant	protein phosphatase 1, regulatory (inhibitor) subunit 2 [Source:RGD Symbol;Acc:621099]
Snd1	chr4	103	103	75.6194	89.4826	13.8632	1.18333	0.139871	0.758279	NotSig	-0.210898	small	27.4573	24.9995	29.915	0.301455	0.793413	1.19663	0.427537	0.693858	Not Sig	nonsignificant	staphylococcal nuclease and tudor domain containing 1 [Source:RGD Symbol;Acc:631340]
Ostc	chr2	110	108	68.0147	76.0088	7.99411	1.11754	0.140652	0.758365	NotSig	-0.247723	small	26.3138	24.4774	28.1501	0.290058	0.66845	1.15004	0.503846	0.747021	Not Sig	nonsignificant	oligosaccharyltransferase complex non-catalytic subunit [Source:RGD Symbol;Acc:1560708]
Rps25	chr8	370	339	54.8895	59.5682	4.67865	1.08524	0.140557	0.758365	NotSig	-0.10528	negligible	66.1604	59.0526	73.2682	0.269065	1.26197	1.24073	0.206958	0.513136	Not Sig	nonsignificant	ribosomal protein s25 [Source:RGD Symbol;Acc:621043]
Psmb4	chr2	217	214	53.1255	60.203	7.0775	1.13322	0.141675	0.760335	NotSig	-0.195778	negligible	57.8257	55.432	60.2195	0.219343	0.793362	1.08637	0.427567	0.693858	Not Sig	nonsignificant	proteasome 20S subunit beta 4 [Source:RGD Symbol;Acc:61877]
Eno1	chr5	1056	1216	75.734	79.1104	3.37648	1.04458	0.143794	0.761982	NotSig	-0.0629397	negligible	247.242	244.656	249.828	0.145603	0.227021	1.02114	0.820408	0.91738	Not Sig	nonsignificant	enolase 1 [Source:RGD Symbol;Acc:2553]
Lamp2	chrX	202	181	90.8891	99.0369	8.14779	1.08965	0.14395	0.761982	NotSig	-0.192017	negligible	41.0595	35.8896	46.2293	0.236416	1.48777	1.2881	0.136811	0.408958	Not Sig	nonsignificant	lysosomal-associated membrane protein 2 [Source:RGD Symbol;Acc:2990]
Rpl13a	chr1	1865	1574	49.8784	51.7604	1.88202	1.03773	0.144506	0.763006	NotSig	-0.0570234	negligible	286.55	236.469	336.632	0.206881	2.49109	1.42358	0.012735	0.115238	Not Sig	nonsignificant	ribosomal protein L13A [Source:RGD Symbol;Acc:628697]
Ppp1r14b	chr1	151	126	62.1762	69.821	7.64479	1.12295	0.145219	0.764225	NotSig	-0.215723	small	32.8309	27.089	38.5728	0.28054	2.07656	1.42393	0.0378426	0.203694	Not Sig	nonsignificant	protein phosphatase 1, regulatory (inhibitor) subunit 14B [Source:RGD Symbol;Acc:628702]
Zwint	chr20	869	1125	106.485	112.21	5.72594	1.05377	0.145857	0.765469	NotSig	-0.0598672	negligible	237.026	256.905	217.147	0.134964	-1.77289	0.84524	0.0762468	0.289842	Not Sig	nonsignificant	ZW10 interacting kinetochore protein [Source:RGD Symbol;Acc:628671]
Fam131a	chr11	195	263	80.6129	92.3013	11.6884	1.14499	0.146027	0.765658	NotSig	-0.104402	negligible	42.424	47.7885	37.0596	0.244301	-1.48924	0.775493	0.136425	0.408891	Not Sig	nonsignificant	family with sequence similarity 131, member A [Source:RGD Symbol;Acc:2322069]
Sst	chr11	431	452	95.5624	90.8749	-4.68749	0.950948	0.146316	0.766265	NotSig	0.0729199	negligible	114.99	105.284	124.695	0.199766	1.11156	1.18437	0.266329	0.579658	Not Sig	nonsignificant	somatostatin [Source:RGD Symbol;Acc:3761]
Sgta	chr7	174	204	78.3119	86.1877	7.8758	1.10057	0.147114	0.766749	NotSig	-0.170978	negligible	46.157	45.738	46.5759	0.226559	0.169641	1.01832	0.865293	0.938941	Not Sig	nonsignificant	small glutamine rich tetratricopeptide repeat co-chaperone alpha [Source:RGD Symbol;Acc:620815]
Otud5	chrX	128	132	83.3891	95.4355	12.0464	1.14446	0.147272	0.766965	NotSig	-0.213558	small	30.2172	28.1192	32.3153	0.272749	0.816176	1.14923	0.4144	0.683915	Not Sig	nonsignificant	OTU deubiquitinase 5 [Source:RGD Symbol;Acc:1563027]
Ube2l3	chr11	194	185	72.7557	80.9757	8.22002	1.11298	0.150022	0.767992	NotSig	-0.208807	small	25.1774	23.2872	27.0676	0.289445	0.761002	1.16234	0.446656	0.698648	Not Sig	nonsignificant	ubiquitin-conjugating enzyme E2L 3 [Source:RGD Symbol;Acc:1308361]
Dipk1b	chr3	99	131	72.3127	86.2998	13.9871	1.19343	0.15013	0.767992	NotSig	-0.152747	negligible	27.1383	27.273	27.0037	0.292913	-0.221028	0.990126	0.825071	0.918942	Not Sig	nonsignificant	divergent protein kinase domain 1B [Source:RGD Symbol;Acc:1308600]
Hnrnpf	chr4	133	169	70.2466	80.2903	10.0437	1.14298	0.149601	0.767992	NotSig	-0.135098	negligible	26.3365	29.3794	23.2937	0.288144	-1.15307	0.792858	0.248883	0.568516	Not Sig	nonsignificant	heterogeneous nuclear ribonucleoprotein F [Source:RGD Symbol;Acc:620366]
Gamt	chr7	240	211	75.4731	79.9491	4.47597	1.05931	0.149497	0.767992	NotSig	-0.150325	negligible	44.8462	40.7518	48.9406	0.238048	1.04505	1.20094	0.296002	0.603975	Not Sig	nonsignificant	guanidinoacetate N-methyltransferase [Source:RGD Symbol;Acc:2659]
Cox7a2	chr8	544	438	70.2241	74.2447	4.02054	1.05725	0.149908	0.767992	NotSig	-0.0861763	negligible	108.673	83.7037	133.643	0.201111	3.45756	1.59662	0.000545084	0.0245288	FDR<0.05	nonsignificant	cytochrome c oxidase subunit 7A2 [Source:RGD Symbol;Acc:68365]
Rpl29	chr8	1051	883	60.3172	62.8993	2.5821	1.04281	0.149838	0.767992	NotSig	-0.0706872	negligible	150.173	125.419	174.927	0.186781	2.58659	1.39474	0.00969312	0.108779	Not Sig	nonsignificant	ribosomal protein L29 [Source:RGD Symbol;Acc:62069]
Sdha	chr1	180	205	85.507	93.7687	8.2617	1.09662	0.150329	0.7686	NotSig	-0.193675	negligible	42.9248	44.338	41.5116	0.234014	-0.298272	0.936252	0.765495	0.896076	Not Sig	nonsignificant	succinate dehydrogenase complex flavoprotein subunit A [Source:RGD Symbol;Acc:621557]
Atp1a2	chr13	1828	1718	79.4639	82.9963	3.53236	1.04445	0.151612	0.769376	NotSig	-0.035302	negligible	336.342	336.052	336.633	0.135108	0.0417873	1.00173	0.966668	0.985162	Not Sig	nonsignificant	ATPase Na+/K+ transporting subunit alpha 2 [Source:RGD Symbol;Acc:2168]
Nnat	chr3	1147	1298	76.0891	78.6081	2.51899	1.03311	0.151005	0.769376	NotSig	-0.0938752	negligible	262.721	261.989	263.453	0.162149	0.00986068	1.00559	0.992132	0.996941	Not Sig	nonsignificant	neuronatin [Source:RGD Symbol;Acc:620155]
Hacd3	chr8	206	247	77.2649	87.9729	10.708	1.13859	0.151582	0.769376	NotSig	-0.125248	negligible	29.6724	33.0165	26.3283	0.30878	-1.10951	0.79743	0.26721	0.580058	Not Sig	nonsignificant	3-hydroxyacyl-CoA dehydratase 3 [Source:RGD Symbol;Acc:1565496]
Bcan	chr2	959	963	73.5728	77.4102	3.83737	1.05216	0.152831	0.769746	NotSig	-0.0646245	negligible	250.053	225.368	274.737	0.153912	1.802	1.21906	0.071546	0.283948	Not Sig	nonsignificant	brevican [Source:RGD Symbol;Acc:2194]
Tmem35a	chrX	183	187	91.6845	100.237	8.55244	1.09328	0.152394	0.769746	NotSig	-0.119636	negligible	30.8801	31.3531	30.4072	0.274772	-0.280476	0.969828	0.779113	0.896865	Not Sig	nonsignificant	transmembrane protein 35A [Source:RGD Symbol;Acc:1303093]
Hnrnpa1	chr7	273	348	75.0165	81.8171	6.80055	1.09065	0.153392	0.769936	NotSig	-0.101269	negligible	69.0904	70.9927	67.188	0.195234	-0.453023	0.946407	0.650532	0.844221	Not Sig	nonsignificant	heterogeneous nuclear ribonucleoprotein A1 [Source:RGD Symbol;Acc:69234]
Fads1	chr1	365	343	90.019	96.0726	6.05357	1.06725	0.153681	0.77043	NotSig	-0.137011	negligible	70.941	72.96	68.922	0.194502	-0.267355	0.944654	0.789196	0.90248	Not Sig	nonsignificant	fatty acid desaturase 1 [Source:RGD Symbol;Acc:621678]
Ndufab1	chr1	165	188	54.7055	62.7586	8.05307	1.14721	0.154941	0.77057	NotSig	-0.125863	negligible	46.1594	45.747	46.5717	0.228487	0.154954	1.01803	0.876858	0.942538	Not Sig	nonsignificant	NADH:ubiquinone oxidoreductase subunit AB1 [Source:RGD Symbol;Acc:1305619]
Cul1	chr4	119	137	90.8391	80.7115	-10.1276	0.88851	0.154887	0.77057	NotSig	0.122657	negligible	29.7317	28.5067	30.9567	0.270817	0.524624	1.08594	0.599845	0.816815	Not Sig	nonsignificant	cullin 1 [Source:RGD Symbol;Acc:1308157]
Enho	chr5	330	319	71.7003	75.7421	4.04178	1.05637	0.15447	0.77057	NotSig	-0.11809	negligible	75.8223	70.2802	81.3645	0.185855	1.18407	1.15772	0.236386	0.555909	Not Sig	nonsignificant	energy homeostasis associated [Source:RGD Symbol;Acc:6487582]
Ttc7b	chr6	138	149	69.0802	79.0355	9.9553	1.14411	0.155398	0.77057	NotSig	-0.212041	small	33.4478	32.8213	34.0743	0.257031	0.275476	1.03818	0.78295	0.897805	Not Sig	nonsignificant	tetratricopeptide repeat domain 7B [Source:RGD Symbol;Acc:1305920]
Setd3	chr6	176	167	71.0651	64.1816	-6.88347	0.903139	0.154466	0.77057	NotSig	0.111042	negligible	37.6422	35.7508	39.5335	0.253464	0.702433	1.10581	0.482409	0.729122	Not Sig	nonsignificant	SET domain containing 3, actin histidine methyltransferase [Source:RGD Symbol;Acc:1309550]
Rpl14	chr8	706	589	54.8139	57.783	2.96906	1.05417	0.154395	0.77057	NotSig	-0.136655	negligible	172.365	144.351	200.379	0.178	2.729	1.38814	0.00635263	0.0929308	Not Sig	nonsignificant	ribosomal protein L14 [Source:RGD Symbol;Acc:621180]
Lamtor1	chr1	132	129	79.7565	87.3617	7.60524	1.09536	0.158145	0.772437	NotSig	-0.148467	negligible	30.6522	27.2483	34.056	0.274806	1.22261	1.24984	0.221478	0.534437	Not Sig	nonsignificant	late endosomal/lysosomal adaptor, MAPK and MTOR activator 1 [Source:RGD Symbol;Acc:735078]
Lamtor4	chr12	134	107	75.4279	85.744	10.3162	1.13677	0.159721	0.772437	NotSig	-0.119965	negligible	32.4686	26.8334	38.1039	0.267865	1.83323	1.42002	0.0667676	0.271142	Not Sig	nonsignificant	late endosomal/lysosomal adaptor, MAPK and MTOR activator 4 [Source:RGD Symbol;Acc:1309735]
Ywhah	chr14	508	726	100.783	107.826	7.0432	1.06988	0.157856	0.772437	NotSig	-0.0869283	negligible	117.09	139.51	94.671	0.196934	-2.752	0.678598	0.00592327	0.0896568	Not Sig	nonsignificant	tyrosine 3-monooxygenase/tryptophan 5-monooxygenase activation protein, eta [Source:RGD Symbol;Acc:3978]
Uqcr10	chr14	530	534	70.4933	74.4045	3.91121	1.05548	0.156797	0.772437	NotSig	-0.0650476	negligible	140.064	126.457	153.67	0.163594	1.60872	1.21519	0.107677	0.361456	Not Sig	nonsignificant	ubiquinol-cytochrome c reductase, complex III subunit X [Source:RGD Symbol;Acc:1595126]
Calr	chr19	881	961	61.4334	58.4192	-3.01422	0.950935	0.159311	0.772437	NotSig	0.083882	negligible	232.98	221.885	244.075	0.14746	0.92088	1.10001	0.357113	0.641666	Not Sig	nonsignificant	calreticulin [Source:RGD Symbol;Acc:620288]
Dgkz	chr3	504	645	87.0458	82.9682	-4.07753	0.953157	0.156949	0.772437	NotSig	0.120831	negligible	141.619	146.458	136.779	0.16909	-0.700758	0.933911	0.483454	0.729122	Not Sig	nonsignificant	diacylglycerol kinase zeta [Source:RGD Symbol;Acc:70929]
Atp5f1e	chr3	841	734	68.0336	70.8196	2.78603	1.04095	0.159543	0.772437	NotSig	-0.0470675	negligible	210.479	176.835	244.123	0.152555	3.04858	1.38051	0.00229927	0.0528266	Not Sig	nonsignificant	ATP synthase F1 subunit epsilon [Source:RGD Symbol;Acc:621374]
LOC120102992	chr5	147	125	58.9661	65.8804	6.9143	1.11726	0.157432	0.772437	NotSig	-0.111609	negligible	30.6657	26.5851	34.7463	0.335298	1.20671	1.30698	0.227545	0.541343	Not Sig	nonsignificant	uncharacterized LOC120102992 [Source:RGD Symbol;Acc:41270116]
Nptxr	chr7	842	1186	107.654	112.232	4.57838	1.04253	0.160159	0.772437	NotSig	-0.0561183	negligible	38.4294	47.3623	29.4964	0.524923	-1.29265	0.622782	0.196133	0.498807	Not Sig	nonsignificant	neuronal pentraxin receptor [Source:RGD Symbol;Acc:628898]
Spryd3	chr7	114	172	88.1119	81.6119	-6.50008	0.926229	0.158555	0.772437	NotSig	0.158853	negligible	27.138	33.2626	21.0135	0.295695	-2.03341	0.631745	0.0420114	0.212188	Not Sig	nonsignificant	SPRY domain containing 3 [Source:RGD Symbol;Acc:1561500]
Rhoa	chr8	367	331	72.6953	79.0076	6.31232	1.08683	0.158219	0.772437	NotSig	-0.147504	negligible	80.8689	71.2274	90.5104	0.182884	1.86907	1.27073	0.0616125	0.260367	Not Sig	nonsignificant	ras homolog family member A [Source:RGD Symbol;Acc:619921]
Canx	chr10	518	574	93.7282	98.6277	4.89949	1.05227	0.160452	0.772638	NotSig	-0.0749232	negligible	81.4921	91.1082	71.876	0.206041	-1.64627	0.788908	0.0997072	0.342969	Not Sig	nonsignificant	calnexin [Source:RGD Symbol;Acc:2266]
Eif3l	chr7	115	118	66.4863	74.8843	8.39796	1.12631	0.160423	0.772638	NotSig	-0.0961346	negligible	29.3386	28.0379	30.6393	0.28387	0.436675	1.09278	0.662347	0.847283	Not Sig	nonsignificant	eukaryotic translation initiation factor 3, subunit L [Source:RGD Symbol;Acc:1308230]
Agap2	chr7	741	966	101.939	106.753	4.8136	1.04722	0.160757	0.773716	NotSig	-0.0467985	negligible	49.4367	60.5907	38.2827	0.609697	-1.09267	0.631825	0.274541	0.585289	Not Sig	nonsignificant	ArfGAP with GTPase domain, ankyrin repeat and PH domain 2 [Source:RGD Symbol;Acc:628844]
Tsc22d1	chr15	382	481	72.9366	78.5006	5.564	1.07629	0.162131	0.77432	NotSig	-0.0699983	negligible	89.9838	95.5126	84.4551	0.198013	-0.912043	0.88423	0.361746	0.646253	Not Sig	nonsignificant	TSC22 domain family, member 1 [Source:RGD Symbol;Acc:3850]
Stmn3	chr3	526	593	90.3456	95.1198	4.77412	1.05284	0.163248	0.77432	NotSig	-0.0671674	negligible	144.579	143.989	145.169	0.157448	0.0338445	1.0082	0.973001	0.987833	Not Sig	nonsignificant	stathmin 3 [Source:RGD Symbol;Acc:3628]
Cct7	chr4	185	210	78.641	87.2698	8.62879	1.10972	0.161419	0.77432	NotSig	-0.0843086	negligible	52.4367	52.2457	52.6278	0.230144	0.152624	1.00731	0.878695	0.942724	Not Sig	nonsignificant	chaperonin containing TCP1 subunit 7 [Source:RGD Symbol;Acc:1306422]
Ndufb6	chr5	192	195	67.3614	76.3502	8.98882	1.13344	0.162549	0.77432	NotSig	-0.112645	negligible	52.2125	46.2631	58.1619	0.218317	1.56231	1.2572	0.118214	0.374908	Not Sig	nonsignificant	NADH:ubiquinone oxidoreductase subunit B6 [Source:RGD Symbol;Acc:1311354]
Matk	chr7	119	115	91.7677	106.088	14.3202	1.15605	0.163391	0.77432	NotSig	-0.216863	small	28.9219	25.2745	32.5693	0.291695	1.28002	1.28862	0.200536	0.50437	Not Sig	nonsignificant	megakaryocyte-associated tyrosine kinase [Source:RGD Symbol;Acc:69058]
Rtkn	chr4	77	96	89.4771	106.535	17.0577	1.19064	0.163187	0.77432	NotSig	-0.163749	negligible	25.2447	26.94	23.5494	0.290526	-0.642106	0.874142	0.520804	0.764488	Not Sig	nonsignificant	rhotekin [Source:RGD Symbol;Acc:727874]
Arl3	chr1	231	181	47.5675	53.1167	5.54926	1.11666	0.164464	0.775268	NotSig	-0.180763	negligible	55.7502	44.4266	67.0739	0.225979	2.57575	1.50977	0.0100023	0.109983	Not Sig	nonsignificant	ADP ribosylation factor like GTPase 3 [Source:RGD Symbol;Acc:69327]
Kalrn	chr11	240	331	77.6294	84.3922	6.76273	1.08712	0.166375	0.77718	NotSig	-0.0957583	negligible	43.8612	49.4517	38.2708	0.241112	-1.4059	0.773902	0.159752	0.4382	Not Sig	nonsignificant	kalirin, RhoGEF kinase [Source:RGD Symbol;Acc:621865]
Ppp2r2c	chr14	393	457	80.9812	87.3743	6.39305	1.07894	0.166332	0.77718	NotSig	-0.104919	negligible	48.4146	52.7129	44.1164	0.23214	-1.17132	0.836917	0.241472	0.560739	Not Sig	nonsignificant	protein phosphatase 2, regulatory subunit B, gamma [Source:RGD Symbol;Acc:620920]
Tubb2b	chr17	459	460	61.6505	65.9759	4.32541	1.07016	0.166636	0.77718	NotSig	-0.102517	negligible	97.0312	93.5887	100.474	0.184745	0.527176	1.07357	0.598072	0.816221	Not Sig	nonsignificant	tubulin, beta 2B class IIb [Source:RGD Symbol;Acc:1309427]
Psmb7	chr3	194	210	53.5322	58.9917	5.45949	1.10199	0.166041	0.77718	NotSig	-0.0977108	negligible	51.8243	49.3998	54.2488	0.219071	0.509886	1.09816	0.610131	0.820572	Not Sig	nonsignificant	proteasome 20S subunit beta 7 [Source:RGD Symbol;Acc:621093]
Rasgef1a	chr4	169	202	78.1157	70.0697	-8.04608	0.896998	0.165675	0.77718	NotSig	0.0793756	negligible	38.0702	41.5561	34.5843	0.256557	-0.809477	0.832231	0.418241	0.685204	Not Sig	nonsignificant	RasGEF domain family, member 1A [Source:RGD Symbol;Acc:1305836]
Mrpl33	chr6	133	138	65.1733	75.1284	9.95511	1.15275	0.165946	0.77718	NotSig	-0.192242	negligible	34.9731	32.4533	37.4929	0.259301	0.740495	1.15529	0.459	0.710255	Not Sig	nonsignificant	mitochondrial ribosomal protein L33 [Source:RGD Symbol;Acc:2322809]
Gpc1	chr9	213	246	99.8479	91.4338	-8.41401	0.915732	0.166445	0.77718	NotSig	0.133084	negligible	46.8157	49.5393	44.0922	0.237535	-0.763052	0.890045	0.445432	0.698648	Not Sig	nonsignificant	glypican 1 [Source:RGD Symbol;Acc:61853]
Ndufc2	chr1	269	247	72.4939	78.43	5.93607	1.08188	0.168547	0.777447	NotSig	-0.111669	negligible	67.1152	57.9618	76.2686	0.206458	1.68812	1.31584	0.0913879	0.325826	Not Sig	nonsignificant	NADH:ubiquinone oxidoreductase subunit C2 [Source:RGD Symbol;Acc:1307511]
Prpf19	chr1	163	241	81.5328	88.5105	6.97767	1.08558	0.169718	0.778285	NotSig	-0.170035	negligible	51.8147	59.5329	44.0965	0.22058	-1.85683	0.740708	0.0633348	0.264706	Not Sig	nonsignificant	pre-mRNA processing factor 19 [Source:RGD Symbol;Acc:708496]
Glrx5	chr6	135	121	51.7807	57.2826	5.50186	1.10625	0.169754	0.778285	NotSig	-0.0628385	negligible	32.9821	30.9305	35.0338	0.277025	0.778861	1.13266	0.436062	0.696459	Not Sig	nonsignificant	glutaredoxin 5 [Source:RGD Symbol;Acc:1308383]
Pik3r2	chr16	122	129	68.3736	78.183	9.80946	1.14347	0.170182	0.779181	NotSig	-0.186527	negligible	33.2977	33.3505	33.245	0.261724	0.0702524	0.996839	0.943993	0.974425	Not Sig	nonsignificant	phosphoinositide-3-kinase regulatory subunit 2 [Source:RGD Symbol;Acc:68341]
Tyro3	chr3	186	190	87.0382	97.7955	10.7573	1.12359	0.170249	0.779181	NotSig	-0.105465	negligible	34.8194	34.4888	35.1499	0.256738	0.157422	1.01917	0.874912	0.942538	Not Sig	nonsignificant	TYRO3 protein tyrosine kinase [Source:RGD Symbol;Acc:3923]
Rps10l1	chr6	183	183	44.8737	49.9859	5.11222	1.11392	0.170472	0.779181	NotSig	-0.224236	small	146.521	126.287	166.756	0.158107	2.56557	1.32045	0.0103007	0.11065	Not Sig	nonsignificant	ribosomal protein S10-like 1 [Source:RGD Symbol;Acc:2323006]
Qk	chr1	816	768	86.1859	92.9205	6.73459	1.07814	0.173177	0.779417	NotSig	-0.094775	negligible	52.1886	60.5751	43.8022	0.247085	-1.9691	0.723106	0.0489413	0.226353	Not Sig	nonsignificant
Egln2	chr1	123	120	69.102	79.2174	10.1154	1.14638	0.173262	0.779417	NotSig	-0.1642	negligible	30.8651	28.1433	33.5868	0.27465	0.950019	1.19342	0.342103	0.631862	Not Sig	nonsignificant	egl-9 family hypoxia-inducible factor 2 [Source:RGD Symbol;Acc:631376]
Ndufs8	chr1	158	153	61.4933	69.4408	7.94746	1.12924	0.173286	0.779417	NotSig	-0.177193	negligible	40.3421	35.5798	45.1043	0.249093	1.36221	1.26769	0.17313	0.46419	Not Sig	nonsignificant	NADH:ubiquinone oxidoreductase core subunit S8 [Source:RGD Symbol;Acc:1309436]
Ppp2r5b	chr1	101	122	100.715	94.0139	-6.70124	0.933463	0.172007	0.779417	NotSig	0.202794	small	27.9497	29.3863	26.513	0.281965	-0.496717	0.902222	0.619389	0.8281	Not Sig	nonsignificant	protein phosphatase 2, regulatory subunit B', beta [Source:RGD Symbol;Acc:727786]
Pithd1	chr5	111	109	84.2664	96.2266	11.9602	1.14193	0.172119	0.779417	NotSig	-0.190157	negligible	28.5296	26.1208	30.9384	0.299995	0.905001	1.18443	0.365465	0.648705	Not Sig	nonsignificant	PITH domain containing 1 [Source:RGD Symbol;Acc:1308048]
Paqr8	chr9	450	374	81.0601	87.6964	6.63627	1.08187	0.174018	0.779417	NotSig	-0.110568	negligible	25.5835	29.3245	21.8426	0.295671	-1.55637	0.744858	0.11962	0.375079	Not Sig	nonsignificant	progestin and adipoQ receptor family member 8 [Source:RGD Symbol;Acc:1311710]
Atp5po	chr11	454	451	61.3737	64.9438	3.57014	1.05817	0.17439	0.780113	NotSig	-0.118762	negligible	118.763	108.046	129.481	0.178587	1.45991	1.19839	0.144314	0.415653	Not Sig	nonsignificant	ATP synthase peripheral stalk subunit OSCP [Source:RGD Symbol;Acc:621379]
Ftl1	chr1	691	620	66.9709	71.0318	4.06088	1.06064	0.174944	0.780323	NotSig	-0.0717452	negligible	185.814	152.518	219.11	0.184114	2.83913	1.43662	0.00452373	0.0772914	Not Sig	nonsignificant	ferritin light chain 1 [Source:RGD Symbol;Acc:61813]
Ttc9b	chr1	223	254	74.7394	81.5356	6.79615	1.09093	0.175998	0.782213	NotSig	-0.172098	negligible	62.6211	60.371	64.8712	0.210933	0.453728	1.07454	0.650025	0.844221	Not Sig	nonsignificant	tetratricopeptide repeat domain 9B [Source:RGD Symbol;Acc:1306256]
P4htm	chr8	102	112	104.686	116.026	11.3393	1.10832	0.17612	0.782389	NotSig	-0.1873	negligible	28.7167	27.996	29.4373	0.293257	0.257873	1.05148	0.796505	0.905243	Not Sig	nonsignificant	prolyl 4-hydroxylase, transmembrane [Source:RGD Symbol;Acc:1311848]
Fscn1	chr12	283	399	89.5502	82.6626	-6.88757	0.923087	0.177438	0.783373	NotSig	0.0889878	negligible	73.8598	83.1675	64.5521	0.195521	-1.92074	0.77617	0.0547639	0.242616	Not Sig	nonsignificant	fascin actin-bundling protein 1 [Source:RGD Symbol;Acc:1583309]
Gpm6a	chr16	1253	1519	92.7079	97.6672	4.95929	1.05349	0.177394	0.783373	NotSig	-0.0541893	negligible	216.302	252.649	179.955	0.162674	-3.01813	0.712273	0.00254339	0.0564633	Not Sig	nonsignificant	glycoprotein m6a [Source:RGD Symbol;Acc:631368]
Agpat1	chr20	347	393	74.0098	80.3956	6.38581	1.08628	0.177338	0.783373	NotSig	-0.0565768	negligible	75.853	76.0122	75.6937	0.185859	-0.0430393	0.99581	0.96567	0.985162	Not Sig	nonsignificant	1-acylglycerol-3-phosphate O-acyltransferase 1 [Source:RGD Symbol;Acc:1303287]
Ndufb11	chrX	299	333	60.8675	65.9174	5.04989	1.08297	0.176973	0.783373	NotSig	-0.0769605	negligible	72.7962	66.8689	78.7235	0.19518	1.11512	1.17728	0.264797	0.577739	Not Sig	nonsignificant	NADH:ubiquinone oxidoreductase subunit B11 [Source:RGD Symbol;Acc:1563698]
Ccdc85b	chr1	230	250	68.912	75.7067	6.79473	1.0986	0.177105	0.783373	NotSig	-0.118642	negligible	57.439	56.8786	57.9994	0.221919	0.170597	1.0197	0.864541	0.938941	Not Sig	nonsignificant	coiled-coil domain containing 85B [Source:RGD Symbol;Acc:1565319]
Rpl23	chr10	841	761	49.4932	51.3588	1.8656	1.03769	0.177821	0.784078	NotSig	-0.0616493	negligible	209.34	183.696	234.983	0.154824	2.32906	1.2792	0.0198559	0.149043	Not Sig	nonsignificant	ribosomal protein L23 [Source:RGD Symbol;Acc:62067]
Aig1	chr1	151	145	73.2507	80.1096	6.85886	1.09364	0.180197	0.784689	NotSig	-0.149568	negligible	34.4162	30.5492	38.2833	0.256862	1.06154	1.25317	0.288446	0.595896	Not Sig	nonsignificant	androgen-induced 1 [Source:RGD Symbol;Acc:1562920]
Snn	chr10	239	247	96.096	105.701	9.60478	1.09995	0.179729	0.784689	NotSig	-0.107464	negligible	28.7822	31.3542	26.2103	0.286045	-0.922986	0.835943	0.356015	0.641666	Not Sig	nonsignificant	stannin [Source:RGD Symbol;Acc:3730]
Hsd11b1	chr13	228	207	56.1067	62.7756	6.6689	1.11886	0.179784	0.784689	NotSig	-0.198195	negligible	54.1895	45.5491	62.8298	0.214538	2.00693	1.37939	0.0447576	0.217899	Not Sig	nonsignificant	hydroxysteroid 11-beta dehydrogenase 1 [Source:RGD Symbol;Acc:2834]
Desi1	chr7	154	160	79.6564	87.704	8.0476	1.10103	0.179093	0.784689	NotSig	-0.142209	negligible	29.0749	30.108	28.0419	0.276947	-0.37099	0.931379	0.710645	0.870021	Not Sig	nonsignificant	desumoylating isopeptidase 1 [Source:RGD Symbol;Acc:1305776]
Timm8b	chr8	366	368	63.8309	67.3324	3.50156	1.05486	0.179801	0.784689	NotSig	-0.122605	negligible	95.404	87.5661	103.242	0.174506	1.4135	1.17902	0.157508	0.435817	Not Sig	nonsignificant	translocase of inner mitochondrial membrane 8 homolog B [Source:RGD Symbol;Acc:619840]
Serbp1	chr4	117	203	73.1973	83.1394	9.94213	1.13583	0.181083	0.78538	NotSig	-0.175572	negligible	26.0078	33.9979	18.0178	0.293293	-3.07418	0.529967	0.00211079	0.0503729	Not Sig	nonsignificant	Serpine1 mRNA binding protein 1 [Source:RGD Symbol;Acc:619907]
H3f3a	chr13	354	340	67.268	73.4304	6.16235	1.09161	0.182078	0.788477	NotSig	-0.139625	negligible	79.3083	71.579	87.0375	0.185738	1.45977	1.21596	0.144353	0.415653	Not Sig	nonsignificant	H3.3 histone A [Source:RGD Symbol;Acc:2319910]
Tmed9	chr17	204	218	78.3883	86.2025	7.81424	1.09969	0.182379	0.788477	NotSig	-0.113666	negligible	45.9195	46.0693	45.7696	0.228173	-0.0214435	0.993496	0.982892	0.992429	Not Sig	nonsignificant	transmembrane p24 trafficking protein 9 [Source:RGD Symbol;Acc:1307627]
Slc38a3	chr8	138	143	84.944	75.7155	-9.22847	0.891358	0.182883	0.789233	NotSig	0.113538	negligible	33.369	31.7864	34.9516	0.272769	0.353402	1.09958	0.723787	0.876432	Not Sig	nonsignificant	solute carrier family 38, member 3 [Source:RGD Symbol;Acc:628620]
Selenok	chr16	343	383	72.1347	77.4156	5.28089	1.07321	0.186337	0.794335	NotSig	-0.106788	negligible	83.1217	84.1071	82.1363	0.197961	-0.145346	0.976568	0.884438	0.945786	Not Sig	nonsignificant	selenoprotein K [Source:RGD Symbol;Acc:1303129]
Hnrnpa2b1	chr4	420	467	98.3031	106.846	8.54323	1.08691	0.187566	0.794652	NotSig	-0.0669367	negligible	113.346	113.74	112.952	0.16869	-0.169774	0.993073	0.865188	0.938941	Not Sig	nonsignificant	heterogeneous nuclear ribonucleoprotein A2/B1 [Source:RGD Symbol;Acc:1310403]
Tubb3	chr19	270	420	66.7692	72.9679	6.19864	1.09284	0.18867	0.79514	NotSig	-0.0714477	negligible	65.9403	80.8369	51.0437	0.201853	-3.30473	0.631441	0.000950676	0.0310368	FDR<0.05	nonsignificant	tubulin, beta 3 class III [Source:RGD Symbol;Acc:628595]
Chi3l1	chr13	125	132	85.825	79.3881	-6.43694	0.924999	0.190304	0.796738	NotSig	0.0842351	negligible	35.8778	34.276	37.4795	0.260569	0.649406	1.09346	0.516076	0.75907	Not Sig	nonsignificant	chitinase 3 like 1 [Source:RGD Symbol;Acc:620874]
Cox7b	chrX	483	431	65.7616	70.3182	4.55659	1.06929	0.191517	0.797917	NotSig	-0.0885641	negligible	115.365	97.832	132.899	0.165244	2.71368	1.35844	0.006654	0.0955079	Not Sig	nonsignificant	cytochrome c oxidase subunit 7B [Source:RGD Symbol;Acc:727789]
LOC100911177	chr3	138	145	61.1721	67.8805	6.70845	1.10967	0.191893	0.798786	NotSig	-0.249498	small	31.8446	28.0793	35.61	0.297647	0.898409	1.26819	0.368967	0.651464	Not Sig	nonsignificant
Prkar1b	chr12	289	374	90.0799	97.5028	7.42284	1.0824	0.192923	0.799405	NotSig	-0.0852229	negligible	73.7702	81.9055	65.6349	0.207195	-1.43064	0.80135	0.152532	0.428273	Not Sig	nonsignificant	protein kinase cAMP-dependent type I regulatory subunit beta [Source:RGD Symbol;Acc:3392]
Arl8b	chr4	162	216	104.738	115.295	10.5571	1.10079	0.194128	0.801431	NotSig	-0.0849717	negligible	35.4335	38.4464	32.4205	0.254256	-1.10762	0.843264	0.268024	0.580312	Not Sig	nonsignificant	ADP-ribosylation factor like GTPase 8B [Source:RGD Symbol;Acc:1562830]
Omg	chr10	179	192	89.8403	81.5153	-8.32502	0.907335	0.194365	0.801437	NotSig	0.119877	negligible	29.7489	33.4447	26.0531	0.293815	-1.23668	0.77899	0.216206	0.525898	Not Sig	nonsignificant	oligodendrocyte-myelin glycoprotein [Source:RGD Symbol;Acc:1359125]
Lrrc4b	chr1	326	464	62.7421	68.4078	5.66569	1.0903	0.19796	0.80318	NotSig	-0.0750084	negligible	52.204	62.2803	42.1276	0.229343	-2.60935	0.67642	0.00907144	0.10712	Not Sig	nonsignificant	leucine rich repeat containing 4B [Source:RGD Symbol;Acc:1307121]
Plekhb1	chr1	512	379	82.9882	87.4386	4.45042	1.05363	0.198255	0.80318	NotSig	-0.0781389	negligible	109.818	86.6469	132.989	0.204093	3.0732	1.53483	0.00211778	0.0503729	Not Sig	nonsignificant	pleckstrin homology domain containing B1 [Source:RGD Symbol;Acc:621614]
Erp29	chr12	369	332	74.6641	70.6895	-3.97465	0.946766	0.197214	0.80318	NotSig	0.113952	negligible	79.3403	72.2643	86.4163	0.188652	1.2833	1.19584	0.199387	0.503	Not Sig	nonsignificant	endoplasmic reticulum protein 29 [Source:RGD Symbol;Acc:619781]
Hspa9	chr18	119	171	109.954	97.5873	-12.367	0.887526	0.197127	0.80318	NotSig	0.185849	negligible	38.4628	40.2504	36.6753	0.248128	-0.544347	0.91118	0.586203	0.809981	Not Sig	nonsignificant	heat shock protein family A (Hsp70) member 9 [Source:RGD Symbol;Acc:1311806]
Ntan1	chr10	131	105	64.4195	72.5632	8.14364	1.12642	0.198921	0.803447	NotSig	-0.110318	negligible	31.2521	25.3929	37.1113	0.279127	1.91002	1.46148	0.0561309	0.24509	Not Sig	nonsignificant
Serinc1	chr20	991	1395	92.3528	97.5982	5.24544	1.0568	0.199207	0.803921	NotSig	-0.0411024	negligible	240.89	276.238	205.542	0.181637	-2.35435	0.744075	0.0185551	0.143547	Not Sig	nonsignificant	serine incorporator 1 [Source:RGD Symbol;Acc:727843]
Eno2	chr4	478	718	98.7185	96.2294	-2.48913	0.974786	0.201973	0.806324	NotSig	0.0786304	negligible	149.087	171.469	126.705	0.168543	-2.52108	0.738939	0.0116996	0.112221	Not Sig	nonsignificant	enolase 2 [Source:RGD Symbol;Acc:2554]
Usp5	chr4	147	161	83.1261	94.6193	11.4932	1.13826	0.201544	0.806324	NotSig	-0.0671855	negligible	40.9294	41.1921	40.6667	0.251652	-0.0938485	0.987245	0.925229	0.967048	Not Sig	nonsignificant	ubiquitin specific peptidase 5 [Source:RGD Symbol;Acc:1308438]
Rtn3	chr1	1462	1698	92.9943	96.7659	3.77163	1.04056	0.202429	0.806494	NotSig	-0.0532127	negligible	303.815	324.76	282.869	0.13925	-1.46169	0.87101	0.143827	0.415653	Not Sig	nonsignificant	reticulon 3 [Source:RGD Symbol;Acc:620988]
Eif1	chr10	479	474	77.1951	83.375	6.17995	1.08006	0.202584	0.806494	NotSig	-0.0850481	negligible	113.888	107.935	119.84	0.166391	0.90717	1.1103	0.364317	0.648705	Not Sig	nonsignificant	eukaryotic translation initiation factor 1 [Source:RGD Symbol;Acc:1306308]
Kctd17	chr7	113	132	114.456	100.48	-13.9759	0.877893	0.20264	0.806494	NotSig	0.171051	negligible	26.9316	24.5955	29.2678	0.292881	0.676561	1.18997	0.498685	0.743345	Not Sig	nonsignificant	potassium channel tetramerization domain containing 17 [Source:RGD Symbol;Acc:1311154]
Tex264	chr8	128	149	69.7683	75.9566	6.18824	1.0887	0.202557	0.806494	NotSig	-0.13274	negligible	36.3019	35.6583	36.9455	0.246789	0.176612	1.0361	0.859813	0.938866	Not Sig	nonsignificant	testis expressed 264 [Source:RGD Symbol;Acc:1359353]
Papss1	chr2	120	144	82.193	91.5918	9.3988	1.11435	0.203506	0.807214	NotSig	-0.159157	negligible	34.0904	35.3681	32.8128	0.256441	-0.542914	0.92775	0.587189	0.810672	Not Sig	nonsignificant	3'-phosphoadenosine 5'-phosphosulfate synthase 1 [Source:RGD Symbol;Acc:1308081]
Fbxo44	chr5	166	158	83.3917	92.9277	9.53597	1.11435	0.203172	0.807214	NotSig	-0.0939156	negligible	40.0535	35.8126	44.2944	0.242661	1.14556	1.23684	0.251979	0.568516	Not Sig	nonsignificant	F-box protein 44 [Source:RGD Symbol;Acc:1562463]
Clk1	chr9	112	91	239.195	263.273	24.0785	1.10066	0.203328	0.807214	NotSig	-0.231753	small	26.4439	19.3507	33.5371	0.307413	2.30183	1.73312	0.021345	0.15385	Not Sig	nonsignificant	CDC-like kinase 1 [Source:RGD Symbol;Acc:1311469]
Add1	chr14	273	299	76.9697	81.9697	4.99999	1.06496	0.204487	0.807259	NotSig	-0.127499	negligible	57.5567	56.8446	58.2688	0.215243	0.0543913	1.02505	0.956623	0.981332	Not Sig	nonsignificant	adducin 1 [Source:RGD Symbol;Acc:2041]
Ptpra	chr3	300	250	88.5299	81.1513	-7.37862	0.916654	0.204224	0.807259	NotSig	0.130054	negligible	69.8799	58.3081	81.4516	0.203601	2.28282	1.39692	0.0224408	0.155468	Not Sig	nonsignificant	protein tyrosine phosphatase, receptor type, A [Source:RGD Symbol;Acc:3450]
Poldip2	chr10	103	125	82.5769	93.5603	10.9834	1.13301	0.205152	0.808069	NotSig	-0.223711	small	26.0256	27.4386	24.6125	0.290826	-0.545161	0.897005	0.585643	0.809981	Not Sig	nonsignificant	DNA polymerase delta interacting protein 2 [Source:RGD Symbol;Acc:1307022]
Abhd8	chr16	319	346	66.5427	71.6808	5.13806	1.07721	0.205046	0.808069	NotSig	-0.0913658	negligible	88.2103	85.836	90.5847	0.195202	0.537511	1.05532	0.590915	0.813118	Not Sig	nonsignificant	abhydrolase domain containing 8 [Source:RGD Symbol;Acc:1305693]
Maz	chr1	125	187	79.3494	85.4479	6.09849	1.07686	0.206428	0.80902	NotSig	-0.119325	negligible	34.9055	39.1391	30.6718	0.261028	-1.39416	0.783663	0.16327	0.445647	Not Sig	nonsignificant	MYC associated zinc finger protein [Source:RGD Symbol;Acc:1594632]
Sumo2	chr10	238	280	69.2719	75.1567	5.88473	1.08495	0.20672	0.80902	NotSig	-0.100423	negligible	58.883	58.1811	59.5848	0.215173	0.00964424	1.02413	0.992305	0.996941	Not Sig	nonsignificant	small ubiquitin-like modifier 2 [Source:RGD Symbol;Acc:621761]
Sema4d	chr17	153	167	99.7711	109.135	9.3642	1.09386	0.206647	0.80902	NotSig	-0.11434	negligible	37.0463	35.8665	38.226	0.24913	0.284107	1.06579	0.776329	0.896659	Not Sig	nonsignificant	semaphorin 4D [Source:RGD Symbol;Acc:1310554]
Wasf1	chr20	297	453	99.0394	108.029	8.98948	1.09077	0.207001	0.80902	NotSig	-0.0994337	negligible	88.6192	101.83	75.4085	0.193693	-2.1055	0.740533	0.0352474	0.195698	Not Sig	nonsignificant	WASP family member 1 [Source:RGD Symbol;Acc:1561954]
H2az1	chr2	214	216	70.5422	76.2033	5.66108	1.08025	0.207232	0.80931	NotSig	-0.0445579	negligible	49.788	45.3523	54.2236	0.223564	1.18206	1.19561	0.237182	0.556208	Not Sig	nonsignificant	H2A.Z variant histone 1 [Source:RGD Symbol;Acc:621464]
Supt5h	chr1	105	110	84.9461	72.7324	-12.2137	0.856218	0.20885	0.811792	NotSig	0.201041	small	28.9839	26.956	31.0119	0.304134	0.727542	1.15046	0.466894	0.716051	Not Sig	nonsignificant	SPT5 homolog, DSIF elongation factor subunit [Source:RGD Symbol;Acc:1563807]
LOC680121	chr11	619	736	56.3095	59.83	3.52057	1.06252	0.209238	0.811792	NotSig	-0.031949	negligible	78.0599	95.2125	60.9073	0.196653	-3.46785	0.639699	0.000524645	0.0242648	FDR<0.05	nonsignificant	similar to heat shock protein 8 [Source:RGD Symbol;Acc:1595502]
Cnih1	chr15	126	145	83.6295	93.3913	9.76176	1.11673	0.209812	0.811792	NotSig	-0.162941	negligible	34.0455	35.9635	32.1276	0.264058	-0.511592	0.893339	0.608936	0.819812	Not Sig	nonsignificant	cornichon family AMPA receptor auxiliary protein 1 [Source:RGD Symbol;Acc:1312030]
Mrpl52	chr15	150	125	56.3162	64.2062	7.89003	1.1401	0.210074	0.811792	NotSig	-0.101217	negligible	36.8296	30.2274	43.4318	0.267405	1.96518	1.43683	0.0493931	0.226698	Not Sig	nonsignificant	mitochondrial ribosomal protein L52 [Source:RGD Symbol;Acc:1309297]
Tomm20	chr19	265	297	75.2466	81.7933	6.54669	1.087	0.210148	0.811792	NotSig	-0.1115	negligible	71.4129	70.5422	72.2836	0.194727	0.178842	1.02469	0.858062	0.938866	Not Sig	nonsignificant	translocase of outer mitochondrial membrane 20 [Source:RGD Symbol;Acc:708467]
Ncor2	chr12	99	147	85.8957	72.2039	-13.6918	0.8406	0.210376	0.811827	NotSig	0.166312	negligible	28.8363	33.4679	24.2047	0.280494	-1.55921	0.72322	0.118946	0.375079	Not Sig	nonsignificant	nuclear receptor co-repressor 2 [Source:RGD Symbol;Acc:1310293]
Ybx3	chr4	310	297	38.969	40.7932	1.82419	1.04681	0.211064	0.811852	NotSig	-0.0661135	negligible	85.342	78.8389	91.8451	0.395311	0.595263	1.16497	0.551668	0.787084	Not Sig	nonsignificant	Y box binding protein 3 [Source:RGD Symbol;Acc:621056]
Agpat4	chr1	193	210	80.7669	86.9067	6.13978	1.07602	0.211958	0.812392	NotSig	-0.105464	negligible	45.7209	44.0378	47.4039	0.22442	0.487878	1.07644	0.625637	0.830334	Not Sig	nonsignificant	1-acylglycerol-3-phosphate O-acyltransferase 4 [Source:RGD Symbol;Acc:619916]
Tmem147	chr1	136	171	72.2546	79.7731	7.51848	1.10406	0.211864	0.812392	NotSig	-0.0927011	negligible	40.401	40.7176	40.0844	0.252087	-0.198667	0.984449	0.842523	0.930411	Not Sig	nonsignificant	transmembrane protein 147 [Source:RGD Symbol;Acc:1304706]
Rps11	chr1	1083	940	43.5071	45.6233	2.1162	1.04864	0.213139	0.812392	NotSig	-0.085763	negligible	262.324	219.4	305.248	0.161409	2.95591	1.39129	0.00311749	0.0625376	Not Sig	nonsignificant	ribosomal protein S11 [Source:RGD Symbol;Acc:621026]
Hectd4	chr12	144	176	92.7742	105.574	12.8	1.13797	0.213614	0.812392	NotSig	-0.079854	negligible	29.5041	36.0808	22.9275	0.306309	-1.97954	0.63545	0.0477557	0.222535	Not Sig	nonsignificant	HECT domain E3 ubiquitin protein ligase 4 [Source:RGD Symbol;Acc:1309762]
Ahcyl1	chr2	356	345	79.7207	84.4747	4.75407	1.05963	0.213217	0.812392	NotSig	-0.100114	negligible	61.6371	57.9857	65.2884	0.208944	0.745856	1.12594	0.455754	0.707865	Not Sig	nonsignificant	adenosylhomocysteinase-like 1 [Source:RGD Symbol;Acc:1309768]
Usf2	chr1	142	147	71.3227	77.9682	6.64552	1.09318	0.213503	0.812392	NotSig	-0.19821	negligible	35.5907	34.06	37.1215	0.253434	0.56805	1.08988	0.570001	0.797523	Not Sig	nonsignificant	upstream transcription factor 2, c-fos interacting [Source:RGD Symbol;Acc:620975]
Reep2	chr18	213	230	82.4245	91.9845	9.55996	1.11598	0.21454	0.812522	NotSig	-0.120337	negligible	43.8769	42.1193	45.6345	0.241853	0.287416	1.08346	0.773794	0.896501	Not Sig	nonsignificant	receptor accessory protein 2 [Source:RGD Symbol;Acc:1586980]
Rpl27	chr10	591	500	45.0754	47.9292	2.85374	1.06331	0.214811	0.812799	NotSig	-0.0474568	negligible	119.792	101.025	138.559	0.17809	2.58512	1.37153	0.00973454	0.108779	Not Sig	nonsignificant	ribosomal protein L27 [Source:RGD Symbol;Acc:621192]
Cadm3	chr13	166	234	91.2902	98.9762	7.68602	1.08419	0.215205	0.81322	NotSig	-0.126903	negligible	34.9358	39.913	29.9586	0.284831	-1.42069	0.750596	0.155406	0.433419	Not Sig	nonsignificant	cell adhesion molecule 3 [Source:RGD Symbol;Acc:1307035]
Gsk3a	chr1	167	196	69.5695	76.0274	6.45793	1.09283	0.216473	0.813763	NotSig	-0.0594903	negligible	54.3581	49.6721	59.0441	0.216749	0.984057	1.18868	0.325088	0.622555	Not Sig	nonsignificant	glycogen synthase kinase 3 alpha [Source:RGD Symbol;Acc:620351]
Snx5	chr3	134	114	85.7123	93.5023	7.78994	1.09088	0.216358	0.813763	NotSig	-0.194398	negligible	33.04	27.522	38.5579	0.265002	1.71179	1.40099	0.0869347	0.316732	Not Sig	nonsignificant	sorting nexin 5 [Source:RGD Symbol;Acc:1310190]
Ptprz1	chr4	328	289	96.2042	106.967	10.7632	1.11188	0.216519	0.813763	NotSig	-0.0423456	negligible	33.0001	32.4225	33.5777	0.277781	0.190418	1.03563	0.848982	0.932424	Not Sig	nonsignificant	protein tyrosine phosphatase, receptor type Z1 [Source:RGD Symbol;Acc:3455]
Ddb1	chr1	205	200	86.0606	94.5154	8.45485	1.09824	0.217943	0.816213	NotSig	-0.12921	negligible	49.5978	46.064	53.1316	0.219437	0.813135	1.15343	0.416141	0.684659	Not Sig	nonsignificant	damage-specific DNA binding protein 1 [Source:RGD Symbol;Acc:621889]
Ccdc47	chr10	155	174	91.268	102.768	11.4996	1.126	0.218374	0.817077	NotSig	-0.11299	negligible	29.8349	32.3216	27.3481	0.290032	-0.806786	0.846124	0.41979	0.686592	Not Sig	nonsignificant	coiled-coil domain containing 47 [Source:RGD Symbol;Acc:1308813]
Rpl27a	chr1	1583	1334	46.0482	47.7308	1.68251	1.03654	0.220362	0.819792	NotSig	-0.0731125	negligible	299.172	249.43	348.914	0.186104	2.63769	1.39885	0.00834739	0.103119	Not Sig	nonsignificant
Pitpnm1	chr1	139	158	83.8829	72.7938	-11.0892	0.867802	0.220645	0.820131	NotSig	0.159925	negligible	40.975	41.9212	40.0288	0.254863	-0.122054	0.95486	0.902856	0.953237	Not Sig	nonsignificant	phosphatidylinositol transfer protein, membrane-associated 1 [Source:RGD Symbol;Acc:1306710]
Ugt8	chr2	240	292	86.8475	93.3709	6.52338	1.07511	0.221688	0.821514	NotSig	-0.0431722	negligible	35.4816	40.3847	30.5784	0.309561	-1.21336	0.757179	0.224991	0.539567	Not Sig	nonsignificant	UDP glycosyltransferase 8 [Source:RGD Symbol;Acc:3938]
Eef1d	chr7	171	161	63.7232	69.591	5.8678	1.09208	0.222371	0.821701	NotSig	-0.17179	negligible	40.6506	35.0622	46.2391	0.242409	1.54475	1.31878	0.122407	0.378839	Not Sig	nonsignificant
Fam107a	chr15	851	634	68.0672	72.0497	3.98248	1.05851	0.222737	0.82252	NotSig	-0.0310331	negligible	79.2813	70.4055	88.1571	0.233443	1.29238	1.25213	0.196227	0.498807	Not Sig	nonsignificant	family with sequence similarity 107, member A [Source:RGD Symbol;Acc:1306327]
Rheb	chr4	124	135	60.937	71.2711	10.3341	1.16959	0.224178	0.825279	NotSig	-0.224785	small	37.0226	35.4561	38.5891	0.257585	0.561284	1.08836	0.574604	0.800598	Not Sig	nonsignificant	Ras homolog, mTORC1 binding [Source:RGD Symbol;Acc:621840]
Eif3f	chr1	366	359	54.554	57.8937	3.33962	1.06122	0.224494	0.826125	NotSig	-0.0435307	negligible	101.572	94.8021	108.342	0.189574	1.13568	1.14282	0.25609	0.572336	Not Sig	nonsignificant	eukaryotic translation initiation factor 3, subunit F [Source:RGD Symbol;Acc:1306112]
Kif1b	chr5	400	482	93.1116	99.8026	6.69097	1.07186	0.224901	0.826815	NotSig	-0.0954595	negligible	30.0191	36.4148	23.6234	0.294221	-2.10879	0.64873	0.0349631	0.195698	Not Sig	nonsignificant	kinesin family member 1B [Source:RGD Symbol;Acc:621520]
Tm9sf2	chr15	134	164	82.2688	75.1165	-7.15237	0.913061	0.22568	0.827675	NotSig	0.172255	negligible	38.652	38.804	38.5	0.241242	-0.166701	0.992168	0.867605	0.939859	Not Sig	nonsignificant	transmembrane 9 superfamily member 2 [Source:RGD Symbol;Acc:1359230]
Hmgn2	chr5	129	148	77.1954	84.6217	7.42635	1.0962	0.225807	0.827675	NotSig	-0.142399	negligible	37.1973	39.6038	34.7908	0.28539	-0.402334	0.878472	0.687438	0.85825	Not Sig	nonsignificant	high mobility group nucleosomal binding domain 2 [Source:RGD Symbol;Acc:620649]
Rps5	chr1	685	596	57.101	59.7312	2.63019	1.04606	0.226545	0.82791	NotSig	-0.0520824	negligible	177.806	150.676	204.935	0.203335	2.18154	1.36011	0.0291437	0.17508	Not Sig	nonsignificant	ribosomal protein S5 [Source:RGD Symbol;Acc:3601]
Bcap31	chrX	199	188	68.117	75.2069	7.08987	1.10408	0.227235	0.829161	NotSig	-0.161112	negligible	50.2707	44.3978	56.1436	0.228291	1.56378	1.26456	0.11787	0.374908	Not Sig	nonsignificant	B-cell receptor-associated protein 31 [Source:RGD Symbol;Acc:1302944]
Apoc1	chr1	285	214	66.5701	62.0321	-4.53792	0.931832	0.227797	0.829254	NotSig	0.0812538	negligible	66.1714	52.3569	79.9859	0.235453	2.65519	1.52771	0.0079263	0.103104	Not Sig	nonsignificant	apolipoprotein C1 [Source:RGD Symbol;Acc:2134]
Drap1	chr1	105	92	69.1774	75.7278	6.55042	1.09469	0.227742	0.829254	NotSig	-0.159898	negligible	25.1161	21.148	29.0842	0.292254	1.58717	1.37527	0.112475	0.368193	Not Sig	nonsignificant	Dr1 associated protein 1 [Source:RGD Symbol;Acc:1308477]
LOC120097345	chr1	28	18	55.0998	71.3723	16.2725	1.29533	0.228432	0.830314	NotSig	-0.170292	negligible	144.197	119.46	168.933	0.164974	2.86223	1.41414	0.00420674	0.0761328	Not Sig	nonsignificant	60S ribosomal protein L7a [Source:RGD Symbol;Acc:41344265]
Camta2	chr10	234	294	88.1706	83.4158	-4.75476	0.946073	0.233779	0.830644	NotSig	0.131913	negligible	65.7517	69.1207	62.3826	0.201341	-0.603659	0.902516	0.54607	0.781777	Not Sig	nonsignificant	calmodulin binding transcription activator 2 [Source:RGD Symbol;Acc:1311296]
Mien1	chr10	140	122	79.2136	86.9318	7.71819	1.09744	0.233431	0.830644	NotSig	-0.126286	negligible	32.4833	29.0783	35.8883	0.263533	1.09532	1.2342	0.273377	0.585055	Not Sig	nonsignificant	migration and invasion enhancer 1 [Source:RGD Symbol;Acc:1306682]
Selenom	chr14	304	325	68.8428	75.6859	6.84306	1.0994	0.231663	0.830644	NotSig	-0.0695442	negligible	81.5337	79.3695	83.6979	0.183878	0.487552	1.05454	0.625867	0.830334	Not Sig	nonsignificant	selenoprotein M [Source:RGD Symbol;Acc:1565037]
Cope	chr16	88	114	68.4032	75.2445	6.84131	1.10001	0.230905	0.830644	NotSig	-0.103361	negligible	25.8749	27.0843	24.6656	0.296823	-0.524393	0.910695	0.600005	0.816815	Not Sig	nonsignificant	COPI coat complex subunit epsilon [Source:RGD Symbol;Acc:1306785]
Ctnnd2	chr2	174	200	66.3283	75.4502	9.12198	1.13753	0.233075	0.830644	NotSig	-0.12047	negligible	32.1591	32.9176	31.4005	0.279468	-0.443883	0.953913	0.657127	0.846472	Not Sig	nonsignificant	catenin delta 2 [Source:RGD Symbol;Acc:620734]
LOC103691527	chr2	126	115	73.2701	83.1201	9.84996	1.13443	0.231689	0.830644	NotSig	-0.165723	negligible	29.515	23.7571	35.2728	0.280724	1.81652	1.48473	0.0692906	0.276664	Not Sig	nonsignificant	uncharacterized LOC103691527 [Source:RGD Symbol;Acc:9202401]
Bpgm	chr4	207	158	48.0159	52.6948	4.67887	1.09744	0.230103	0.830644	NotSig	-0.129176	negligible	43.3538	36.1295	50.578	0.271724	1.81961	1.39991	0.0688181	0.276102	Not Sig	nonsignificant	bisphosphoglycerate mutase [Source:RGD Symbol;Acc:735018]
Atp6v1c1	chr7	119	150	103.126	96.961	-6.16493	0.940219	0.231038	0.830644	NotSig	0.182231	negligible	33.0041	36.2366	29.7717	0.270858	-0.952114	0.821591	0.341039	0.631862	Not Sig	nonsignificant	ATPase H+ transporting V1 subunit C1 [Source:RGD Symbol;Acc:1311082]
Ncam1	chr8	396	438	89.1684	95.3723	6.20393	1.06958	0.233599	0.830644	NotSig	-0.0558778	negligible	33.1455	38.4054	27.8857	0.311226	-1.57227	0.726089	0.115889	0.37322	Not Sig	nonsignificant	neural cell adhesion molecule 1 [Source:RGD Symbol;Acc:67378]
Copa	chr13	105	124	94.5988	86.0894	-8.50938	0.910048	0.230091	0.830644	NotSig	0.075426	negligible	30.851	30.7361	30.9659	0.287993	-0.0737714	1.00748	0.941192	0.97405	Not Sig	nonsignificant	COPI coat complex subunit alpha [Source:RGD Symbol;Acc:1310525]
Syn1	chrX	353	516	108.428	103.698	-4.73036	0.956373	0.234246	0.831479	NotSig	0.0958364	negligible	84.9229	99.1245	70.7212	0.191401	-2.47309	0.713458	0.0133952	0.117205	Not Sig	nonsignificant	synapsin I [Source:RGD Symbol;Acc:3797]
Psmd2	chr11	138	125	68.7047	78.4865	9.78176	1.14237	0.23504	0.832266	NotSig	-0.162878	negligible	37.4075	33.1308	41.6842	0.262838	1.33448	1.25817	0.182045	0.477331	Not Sig	nonsignificant	proteasome 26S subunit ubiquitin receptor, non-ATPase 2 [Source:RGD Symbol;Acc:1305752]
Psmb1	chr1	220	229	59.7284	65.1551	5.42668	1.09086	0.235642	0.833198	NotSig	-0.0539514	negligible	60.3764	56.1901	64.5628	0.210251	0.973332	1.14901	0.330388	0.626706	Not Sig	nonsignificant	proteasome 20S subunit beta 1 [Source:RGD Symbol;Acc:621092]
Nrgn	chr8	1120	1297	113.148	110.792	-2.35621	0.979176	0.236652	0.834486	NotSig	0.0541043	negligible	135.967	142.437	129.498	0.162728	-0.934179	0.909165	0.350212	0.639443	Not Sig	nonsignificant	neurogranin [Source:RGD Symbol;Acc:61833]
Atox1	chr10	152	120	76.0046	82.625	6.6204	1.08711	0.238666	0.837485	NotSig	-0.097372	negligible	37.6535	29.599	45.708	0.249916	2.42579	1.54424	0.0152752	0.129642	Not Sig	nonsignificant	antioxidant 1 copper chaperone [Source:RGD Symbol;Acc:621684]
Sptbn4	chr1	128	133	89.4287	103.353	13.9247	1.15571	0.240871	0.838612	NotSig	-0.127834	negligible	32.8654	32.4806	33.2501	0.268753	0.285381	1.02369	0.775352	0.896501	Not Sig	nonsignificant	spectrin, beta, non-erythrocytic 4 [Source:RGD Symbol;Acc:1304682]
Otub1	chr1	202	239	88.393	93.7997	5.40668	1.06117	0.243404	0.838612	NotSig	-0.1196	negligible	47.6128	49.3717	45.8539	0.226083	-0.488968	0.928749	0.624864	0.830334	Not Sig	nonsignificant	OTU deubiquitinase, ubiquitin aldehyde binding 1 [Source:RGD Symbol;Acc:1311329]
Sparc	chr10	1706	1684	104.291	102.523	-1.76867	0.983041	0.244591	0.838612	NotSig	0.0454799	negligible	345.029	327.217	362.841	0.137067	1.12127	1.10887	0.262174	0.575124	Not Sig	nonsignificant	secreted protein acidic and cysteine rich [Source:RGD Symbol;Acc:3742]
Ormdl3	chr10	198	220	85.8974	92.1312	6.23384	1.07257	0.241316	0.838612	NotSig	-0.113118	negligible	32.3704	34.2722	30.4686	0.2741	-0.659921	0.889017	0.509305	0.753102	Not Sig	nonsignificant	ORMDL sphingolipid biosynthesis regulator 3 [Source:RGD Symbol;Acc:1560577]
Tagln3	chr11	218	229	81.192	89.636	8.44393	1.104	0.244735	0.838612	NotSig	-0.0826615	negligible	59.2918	55.1695	63.4141	0.206989	1.01059	1.14944	0.312213	0.611536	Not Sig	nonsignificant	transgelin 3 [Source:RGD Symbol;Acc:69301]
Ctsl	chr17	212	217	80.063	76.6193	-3.44369	0.956988	0.239858	0.838612	NotSig	0.135477	negligible	57.9923	53.7972	62.1874	0.208232	1.05043	1.15596	0.293519	0.601858	Not Sig	nonsignificant	cathepsin L [Source:RGD Symbol;Acc:2448]
Pfkp	chr17	197	249	95.2925	104.131	8.83885	1.09275	0.242152	0.838612	NotSig	-0.0338297	negligible	57.9712	59.5288	56.4136	0.205129	-0.416046	0.94767	0.677376	0.855065	Not Sig	nonsignificant	phosphofructokinase, platelet [Source:RGD Symbol;Acc:61893]
Mdk	chr3	185	173	58.2421	62.9709	4.72883	1.08119	0.242932	0.838612	NotSig	-0.0687749	negligible	46.5884	41.9759	51.201	0.232197	1.21057	1.21977	0.226059	0.540788	Not Sig	nonsignificant	midkine [Source:RGD Symbol;Acc:69073]
Ndufa4	chr4	887	875	81.6803	84.7437	3.06342	1.03751	0.245859	0.838612	NotSig	-0.0451974	negligible	35.0627	35.8355	34.29	0.263686	-0.0723723	0.95687	0.942306	0.97405	Not Sig	nonsignificant	Ndufa4, mitochondrial complex associated [Source:RGD Symbol;Acc:1584719]
Cap1	chr5	173	250	85.2919	94.0915	8.79965	1.10317	0.2421	0.838612	NotSig	-0.142359	negligible	46.2561	49.3758	43.1364	0.236592	-1.00182	0.873635	0.316431	0.613339	Not Sig	nonsignificant	cyclase associated actin cytoskeleton regulatory protein 1 [Source:RGD Symbol;Acc:620309]
Tmem50a	chr5	260	273	99.8433	95.4378	-4.40549	0.955876	0.242073	0.838612	NotSig	0.14101	negligible	70.8764	66.4799	75.2729	0.191832	1.11506	1.13227	0.264827	0.577739	Not Sig	nonsignificant	transmembrane protein 50A [Source:RGD Symbol;Acc:1305638]
Cct2	chr7	110	156	71.8082	81.1351	9.32684	1.12989	0.245548	0.838612	NotSig	-0.176485	negligible	34.7556	37.6228	31.8883	0.254608	-0.969497	0.847579	0.332297	0.626706	Not Sig	nonsignificant	chaperonin containing TCP1 subunit 2 [Source:RGD Symbol;Acc:1359143]
Smdt1	chr7	210	187	76.0123	80.0808	4.06851	1.05352	0.243132	0.838612	NotSig	-0.0902555	negligible	51.0282	43.9682	58.0881	0.219502	1.82991	1.32114	0.0672637	0.272492	Not Sig	nonsignificant	single-pass membrane protein with aspartate-rich tail 1 [Source:RGD Symbol;Acc:1311310]
Pcbp2	chr7	273	261	78.229	85.0697	6.84073	1.08744	0.243417	0.838612	NotSig	-0.0557417	negligible	64.5415	59.6859	69.397	0.19974	1.06374	1.1627	0.287448	0.595896	Not Sig	nonsignificant	poly(rC) binding protein 2 [Source:RGD Symbol;Acc:1309626]
LOC120099695	chrUn_NW_023637831v1	1146	813	45.1653	46.1537	0.988317	1.02188	0.24353	0.838612	NotSig	0.0207874	negligible	417.185	329.685	504.684	0.620727	0.993354	1.53081	0.320538	0.618419	Not Sig	nonsignificant	18S ribosomal RNA [Source:RGD Symbol;Acc:41054322]
Uba1	chrX	178	248	67.4348	72.5628	5.12801	1.07604	0.242423	0.838612	NotSig	-0.113684	negligible	58.35	64.1325	52.5675	0.210887	-1.33601	0.819671	0.181548	0.477331	Not Sig	nonsignificant	ubiquitin-like modifier activating enzyme 1 [Source:RGD Symbol;Acc:1359327]
Ubqln1	chr17	161	171	83.0461	90.5301	7.48403	1.09012	0.246228	0.838673	NotSig	-0.0467836	negligible	31.9581	32.6135	31.3027	0.261484	-0.188017	0.959808	0.850863	0.933874	Not Sig	nonsignificant	ubiquilin 1 [Source:RGD Symbol;Acc:620745]
Fau	chr1	1130	903	52.2355	54.4829	2.24741	1.04302	0.247013	0.839374	NotSig	-0.0481767	negligible	147.481	126.216	168.746	0.214202	2.08757	1.33696	0.0368365	0.202419	Not Sig	nonsignificant	FAU ubiquitin like and ribosomal protein S30 fusion [Source:RGD Symbol;Acc:61938]
Lage3	chrX	135	145	71.3854	78.7599	7.37446	1.1033	0.24715	0.839374	NotSig	-0.137194	negligible	35.47	33.9372	37.0028	0.253512	0.412085	1.09033	0.680277	0.857428	Not Sig	nonsignificant	L antigen family, member 3 [Source:RGD Symbol;Acc:1562476]
Bag6	chr20	196	190	80.5155	75.1745	-5.34098	0.933665	0.247424	0.839442	NotSig	0.129093	negligible	50.854	47.9617	53.7463	0.215027	0.777364	1.12061	0.436944	0.696459	Not Sig	nonsignificant	BAG cochaperone 6 [Source:RGD Symbol;Acc:71064]
Fxyd1	chr1	191	195	70.7518	77.0584	6.30662	1.08914	0.25139	0.840263	NotSig	-0.114121	negligible	49.1176	46.3379	51.8973	0.22671	0.853599	1.11998	0.393327	0.666215	Not Sig	nonsignificant	FXYD domain-containing ion transport regulator 1 [Source:RGD Symbol;Acc:69306]
Wscd1	chr10	259	293	89.907	83.8554	-6.05162	0.93269	0.250586	0.840263	NotSig	0.137487	negligible	55.3501	53.7728	56.9275	0.220108	0.194898	1.05867	0.845473	0.930411	Not Sig	nonsignificant	WSC domain containing 1 [Source:RGD Symbol;Acc:1308212]
Unc5a	chr17	113	164	95.1579	81.2187	-13.9392	0.853515	0.248884	0.840263	NotSig	0.143297	negligible	27.3596	29.3709	25.3482	0.28144	-0.886234	0.863038	0.375491	0.653783	Not Sig	nonsignificant	unc-5 netrin receptor A [Source:RGD Symbol;Acc:621755]
Mrps21	chr2	101	94	67.7626	76.7126	8.95006	1.13208	0.250488	0.840263	NotSig	-0.0804691	negligible	26.6388	23.0482	30.2293	0.284993	1.44604	1.31157	0.148167	0.422824	Not Sig	nonsignificant	mitochondrial ribosomal protein S21 [Source:RGD Symbol;Acc:1592330]
Phyhipl	chr20	149	197	81.0175	88.0633	7.04581	1.08697	0.24923	0.840263	NotSig	-0.0664383	negligible	40.276	43.4975	37.0545	0.245866	-0.812152	0.851876	0.416704	0.684909	Not Sig	nonsignificant	phytanoyl-CoA 2-hydroxylase interacting protein-like [Source:RGD Symbol;Acc:1307967]
Prdx1	chr5	227	216	76.3974	81.3706	4.97319	1.0651	0.248584	0.840263	NotSig	-0.069683	negligible	41.5225	38.5595	44.4854	0.241196	0.962743	1.15368	0.335677	0.628825	Not Sig	nonsignificant	peroxiredoxin 1 [Source:RGD Symbol;Acc:620039]
Clstn1	chr5	967	1035	98.8399	102.687	3.84761	1.03893	0.25077	0.840263	NotSig	-0.049721	negligible	193.96	200.257	187.662	0.17569	-0.521344	0.937107	0.602127	0.816815	Not Sig	nonsignificant	calsyntenin 1 [Source:RGD Symbol;Acc:1306458]
Ppp2r5c	chr6	178	175	80.1367	73.1791	-6.95764	0.913178	0.250727	0.840263	NotSig	0.155786	negligible	36.4483	34.8412	38.0555	0.268885	0.4777	1.09225	0.632864	0.832835	Not Sig	nonsignificant	protein phosphatase 2, regulatory subunit B', gamma [Source:RGD Symbol;Acc:1585097]
Banf1	chr1	142	145	70.9492	64.4993	-6.44992	0.909091	0.252418	0.841394	NotSig	0.180687	negligible	38.855	37.6604	40.0496	0.249128	0.511397	1.06344	0.609073	0.819812	Not Sig	nonsignificant	BAF nuclear assembly factor 1 [Source:RGD Symbol;Acc:620662]
Rps12	chr1	573	382	49.8851	52.8853	3.00021	1.06014	0.252903	0.841538	NotSig	-0.0974322	negligible	34.1829	27.5609	40.8048	0.307738	1.97822	1.48053	0.0479037	0.222535	Not Sig	nonsignificant	ribosomal protein S12 [Source:RGD Symbol;Acc:62024]
Pgrmc1	chrX	333	386	97.8297	104.801	6.97081	1.07125	0.252839	0.841538	NotSig	-0.113898	negligible	77.7828	82.3137	73.2519	0.182912	-0.828608	0.889912	0.407326	0.68097	Not Sig	nonsignificant	progesterone receptor membrane component 1 [Source:RGD Symbol;Acc:70890]
Acyp2	chr14	132	116	78.216	85.8831	7.66707	1.09802	0.253961	0.843342	NotSig	-0.137932	negligible	30.8808	24.8011	36.9606	0.290186	1.87943	1.49028	0.0601852	0.25851	Not Sig	nonsignificant	acylphosphatase 2 [Source:RGD Symbol;Acc:1595836]
Phactr3	chr3	219	223	77.539	84.4149	6.87597	1.08868	0.254952	0.843447	NotSig	-0.129882	negligible	60.6167	57.0691	64.1642	0.208526	0.916934	1.12432	0.359177	0.643043	Not Sig	nonsignificant	phosphatase and actin regulator 3 [Source:RGD Symbol;Acc:1303029]
Gpr137	chr1	124	127	80.3486	89.0147	8.66617	1.10786	0.255778	0.843459	NotSig	-0.205044	small	33.4234	30.2961	36.5506	0.261768	1.01011	1.20645	0.312443	0.611536	Not Sig	nonsignificant	G protein-coupled receptor 137 [Source:RGD Symbol;Acc:1586317]
LOC690468	chr2	530	454	52.2931	54.9471	2.65404	1.05075	0.255507	0.843459	NotSig	-0.0711028	negligible	114.645	99.1334	130.157	0.177513	2.27283	1.31295	0.0230362	0.155468	Not Sig	nonsignificant
Sppl3	chr12	122	138	72.5686	85.2565	12.6878	1.17484	0.255198	0.843459	NotSig	-0.131963	negligible	25.267	26.1604	24.3736	0.299864	-0.461123	0.931699	0.64471	0.84207	Not Sig	nonsignificant	signal peptide peptidase like 3 [Source:RGD Symbol;Acc:1562826]
Manbal	chr3	121	123	86.9796	82.3386	-4.64093	0.946643	0.256471	0.843773	NotSig	0.132938	negligible	29.1276	28.1717	30.0836	0.288538	0.339433	1.06786	0.734284	0.87917	Not Sig	nonsignificant	mannosidase beta like [Source:RGD Symbol;Acc:1561447]
C2cd2l	chr8	180	211	67.1493	73.936	6.78674	1.10107	0.257388	0.844083	NotSig	-0.0655311	negligible	43.2101	43.478	42.9422	0.231628	-0.231816	0.987677	0.816681	0.916908	Not Sig	nonsignificant	C2CD2-like [Source:RGD Symbol;Acc:1310281]
Rnf13	chr2	144	178	89.6113	82.8302	-6.78112	0.924327	0.258507	0.84418	NotSig	0.148277	negligible	34.1943	34.662	33.7267	0.263234	-0.0229266	0.973017	0.981709	0.992429	Not Sig	nonsignificant	ring finger protein 13 [Source:RGD Symbol;Acc:1594062]
Rasgrp1	chr3	164	225	80.7887	75.9384	-4.85028	0.939963	0.258642	0.84418	NotSig	0.081669	negligible	27.6768	37.4559	17.8978	0.295174	-3.51843	0.477836	0.000434116	0.0234009	FDR<0.05	downregulated	RAS guanyl releasing protein 1 [Source:RGD Symbol;Acc:3539]
Sod1	chr11	327	311	63.2052	67.7023	4.49708	1.07115	0.262663	0.84523	NotSig	-0.0657418	negligible	84.6572	77.1405	92.1739	0.208263	1.39056	1.19488	0.16436	0.447889	Not Sig	nonsignificant	superoxide dismutase 1 [Source:RGD Symbol;Acc:3731]
Apod	chr11	226	232	75.6255	79.181	3.55544	1.04701	0.261068	0.84523	NotSig	-0.0747246	negligible	58.9183	53.6563	64.1803	0.212829	1.10325	1.19614	0.269919	0.58139	Not Sig	nonsignificant	apolipoprotein D [Source:RGD Symbol;Acc:2137]
Por	chr12	127	125	73.5898	84.2617	10.6718	1.14502	0.267101	0.84523	NotSig	-0.133572	negligible	33.2825	32.3343	34.2306	0.2596	0.384201	1.05865	0.70083	0.866015	Not Sig	nonsignificant	cytochrome p450 oxidoreductase [Source:RGD Symbol;Acc:68335]
Iscu	chr12	139	150	71.3198	76.7129	5.39311	1.07562	0.265407	0.84523	NotSig	-0.131724	negligible	36.5663	33.5675	39.5651	0.257398	0.885716	1.17867	0.375771	0.653783	Not Sig	nonsignificant	iron-sulfur cluster assembly enzyme [Source:RGD Symbol;Acc:1309562]
Sdhc	chr13	257	249	67.0657	72.0273	4.96164	1.07398	0.262076	0.84523	NotSig	-0.122239	negligible	65.0761	59.9559	70.1963	0.222392	0.957395	1.1708	0.338368	0.630887	Not Sig	nonsignificant	succinate dehydrogenase complex subunit C [Source:RGD Symbol;Acc:1359454]
Mtarc2	chr13	105	106	74.1432	67.0341	-7.10911	0.904117	0.262817	0.84523	NotSig	0.20872	small	26.5127	24.4371	28.5884	0.295372	0.764766	1.16988	0.444411	0.698648	Not Sig	nonsignificant
Ccni	chr14	488	472	65.4729	61.8237	-3.64919	0.944264	0.264504	0.84523	NotSig	0.0885398	negligible	107.775	104.436	111.114	0.181651	0.44348	1.06395	0.657418	0.846472	Not Sig	nonsignificant	cyclin I [Source:RGD Symbol;Acc:1309209]
Klhl2	chr16	153	180	92.7527	107.166	14.4133	1.15539	0.262985	0.84523	NotSig	-0.09208	negligible	31.3225	32.8959	29.7492	0.264928	-0.555445	0.904344	0.578591	0.804806	Not Sig	nonsignificant	kelch-like family member 2 [Source:RGD Symbol;Acc:1306388]
Hsbp1	chr19	423	389	87.9152	92.8878	4.9726	1.05656	0.270376	0.84523	NotSig	-0.0623841	negligible	99.6848	92.194	107.176	0.171274	1.42766	1.1625	0.153389	0.429954	Not Sig	nonsignificant	heat shock factor binding protein 1 [Source:RGD Symbol;Acc:628632]
Schip1	chr2	118	120	94.4841	81.224	-13.2601	0.859658	0.266555	0.84523	NotSig	0.130752	negligible	32.987	32.6908	33.2832	0.265982	0.195483	1.01812	0.845015	0.930411	Not Sig	nonsignificant	schwannomin interacting protein 1 [Source:RGD Symbol;Acc:1309962]
Abhd16a	chr20	100	114	70.4931	82.4265	11.9334	1.16929	0.269039	0.84523	NotSig	-0.14682	negligible	26.2865	25.8552	26.7178	0.285925	0.203347	1.03336	0.838864	0.928048	Not Sig	nonsignificant	abhydrolase domain containing 16A, phospholipase [Source:RGD Symbol;Acc:1303164]
Ergic3	chr3	184	197	78.6712	85.194	6.52277	1.08291	0.26873	0.84523	NotSig	-0.0927872	negligible	48.7505	44.973	52.5279	0.222288	0.887621	1.16799	0.374745	0.653783	Not Sig	nonsignificant	ERGIC and golgi 3 [Source:RGD Symbol;Acc:1308144]
Lrp1	chr7	406	375	99.1635	106.037	6.87378	1.06932	0.265399	0.84523	NotSig	-0.111332	negligible	92.4748	82.7812	102.168	0.181869	1.54964	1.2342	0.121227	0.377278	Not Sig	nonsignificant	LDL receptor related protein 1 [Source:RGD Symbol;Acc:1307535]
Fez1	chr8	263	273	79.7361	86.3421	6.60601	1.08285	0.264509	0.84523	NotSig	-0.105264	negligible	71.6088	65.4396	77.7781	0.203645	1.20743	1.18855	0.227266	0.541343	Not Sig	nonsignificant	fasciculation and elongation protein zeta 1 [Source:RGD Symbol;Acc:619708]
Cox5b	chr9	737	684	62.6983	65.2032	2.50488	1.03995	0.26945	0.84523	NotSig	-0.0468693	negligible	186.989	161.914	212.064	0.143168	2.70868	1.30973	0.00675522	0.096132	Not Sig	nonsignificant	cytochrome c oxidase subunit 5B [Source:RGD Symbol;Acc:620608]
Pnkd	chr9	206	207	88.5708	96.4564	7.88556	1.08903	0.267989	0.84523	NotSig	-0.107433	negligible	38.8133	38.1327	39.494	0.2478	0.222445	1.0357	0.823967	0.918892	Not Sig	nonsignificant	PNKD metallo-beta-lactamase domain containing [Source:RGD Symbol;Acc:2300155]
LOC689899	chr14	34	21	48.771	38.345	-10.4261	0.786224	0.271154	0.84536	NotSig	0.413933	small	148.365	123.801	172.929	0.157155	2.96077	1.39683	0.00306874	0.0623103	Not Sig	nonsignificant
Slc25a3	chr7	466	539	75.8903	72.8563	-3.03399	0.960021	0.27119	0.84536	NotSig	0.0612388	negligible	137.232	137.921	136.544	0.172474	0.0012785	0.990017	0.99898	0.99958	Not Sig	nonsignificant
Syt5	chr1	239	246	92.2609	97.6722	5.41131	1.05865	0.272703	0.846137	NotSig	-0.067197	negligible	63.7221	60.5925	66.8518	0.203873	0.685998	1.1033	0.492714	0.737742	Not Sig	nonsignificant	synaptotagmin 5 [Source:RGD Symbol;Acc:3806]
Septin8	chr10	249	286	86.4871	94.6184	8.13136	1.09402	0.273124	0.846219	NotSig	-0.0788651	negligible	49.378	54.8446	43.9113	0.222497	-1.40999	0.800649	0.158542	0.436319	Not Sig	nonsignificant	septin 8 [Source:RGD Symbol;Acc:1308449]
Mlf2	chr4	522	528	80.3697	77.7503	-2.61939	0.967408	0.27457	0.846598	NotSig	0.0241963	negligible	142.705	130.062	155.347	0.160592	1.5971	1.19441	0.110243	0.365647	Not Sig	nonsignificant	myeloid leukemia factor 2 [Source:RGD Symbol;Acc:1306294]
Ndufa3	chr1	442	403	61.8169	64.7611	2.94421	1.04763	0.276771	0.847262	NotSig	-0.0671844	negligible	100.103	87.5759	112.631	0.202686	1.80148	1.2861	0.0716265	0.283948	Not Sig	nonsignificant	NADH:ubiquinone oxidoreductase subunit A3 [Source:RGD Symbol;Acc:1588687]
Crtac1	chr1	100	115	82.0532	91.2915	9.23834	1.11259	0.275613	0.847262	NotSig	-0.140924	negligible	26.2508	25.7284	26.7732	0.29692	0.156404	1.04061	0.875715	0.942538	Not Sig	nonsignificant	cartilage acidic protein 1 [Source:RGD Symbol;Acc:621085]
Vdac3	chr16	172	225	64.8955	72.1667	7.27122	1.11205	0.276238	0.847262	NotSig	-0.0753184	negligible	54.9381	54.0554	55.8208	0.228316	0.112832	1.03266	0.910164	0.95731	Not Sig	nonsignificant	voltage-dependent anion channel 3 [Source:RGD Symbol;Acc:621577]
Enc1	chr2	315	504	90.8857	94.84	3.95435	1.04351	0.276127	0.847262	NotSig	-0.0401809	negligible	63.045	78.0864	48.0035	0.221607	-3.26644	0.614748	0.00108909	0.0341056	FDR<0.05	nonsignificant	ectodermal-neural cortex 1 [Source:RGD Symbol;Acc:1303152]
Psmd6	chr15	93	116	77.6295	91.6687	14.0392	1.18085	0.277832	0.848014	NotSig	-0.164252	negligible	27.3146	27.3307	27.2985	0.281348	-0.0537084	0.998821	0.957168	0.981332	Not Sig	nonsignificant	proteasome 26S subunit, non-ATPase 6 [Source:RGD Symbol;Acc:735127]
RGD1560398	chr12	110	135	88.1534	95.8248	7.67136	1.08702	0.279627	0.848202	NotSig	-0.141108	negligible	26.6434	26.1408	27.146	0.304276	0.0362943	1.03845	0.971048	0.98758	Not Sig	nonsignificant	RGD1560398 [Source:RGD Symbol;Acc:1560398]
Rpl5	chr14	729	638	53.4813	55.5493	2.06796	1.03867	0.279818	0.848202	NotSig	-0.0581126	negligible	178.493	152.908	204.078	0.187586	2.25458	1.33464	0.0241594	0.157881	Not Sig	nonsignificant	ribosomal protein L5 [Source:RGD Symbol;Acc:619825]
Rangap1	chr7	117	168	94.4247	89.1532	-5.27148	0.944173	0.27863	0.848202	NotSig	0.118726	negligible	34.8036	36.6038	33.0035	0.28473	-0.70128	0.901641	0.483129	0.729122	Not Sig	nonsignificant	RAN GTPase activating protein 1 [Source:RGD Symbol;Acc:1310380]
Sar1b	chr10	123	142	79.4912	86.644	7.15278	1.08998	0.280123	0.848209	NotSig	-0.172597	negligible	36.7369	36.2109	37.2629	0.260712	0.242447	1.02905	0.808433	0.912571	Not Sig	nonsignificant	secretion associated, Ras related GTPase 1B [Source:RGD Symbol;Acc:1305590]
Asphd2	chr12	112	132	81.6247	89.1163	7.49161	1.09178	0.280812	0.849136	NotSig	-0.15513	negligible	30.1197	31.1166	29.1228	0.26998	-0.272113	0.935925	0.785535	0.899886	Not Sig	nonsignificant	aspartate beta-hydroxylase domain containing 2 [Source:RGD Symbol;Acc:1306020]
Psmd4	chr2	103	119	71.839	64.1983	-7.64071	0.893641	0.281445	0.8499	NotSig	0.11487	negligible	30.8962	29.2876	32.5048	0.281847	0.408451	1.10985	0.682942	0.858188	Not Sig	nonsignificant	proteasome 26S subunit ubiquitin receptor, non-ATPase 4 [Source:RGD Symbol;Acc:621109]
M6pr	chr4	114	142	65.1063	71.4925	6.38622	1.09809	0.281569	0.8499	NotSig	-0.0710577	negligible	28.5089	29.0491	27.9687	0.281096	-0.353006	0.962808	0.724084	0.876432	Not Sig	nonsignificant	mannose-6-phosphate receptor, cation dependent [Source:RGD Symbol;Acc:1359355]
Ankrd46	chr7	126	146	86.9906	80.185	-6.80558	0.921766	0.281283	0.8499	NotSig	0.0982798	negligible	28.7916	29.6167	27.9664	0.273754	-0.342824	0.944277	0.731731	0.878329	Not Sig	nonsignificant	ankyrin repeat domain 46 [Source:RGD Symbol;Acc:1309382]
Sptan1	chr3	490	517	89.8488	95.1996	5.35082	1.05955	0.282462	0.85123	NotSig	-0.0517559	negligible	138.521	131.619	145.423	0.155107	0.975974	1.10488	0.329078	0.625473	Not Sig	nonsignificant	spectrin, alpha, non-erythrocytic 1 [Source:RGD Symbol;Acc:621714]
Synpr	chr15	122	189	99.3064	112.398	13.0911	1.13183	0.282853	0.851695	NotSig	-0.0960035	negligible	32.784	37.4613	28.1067	0.288775	-1.51805	0.750285	0.129002	0.39472	Not Sig	nonsignificant	synaptoporin [Source:RGD Symbol;Acc:708366]
Trak2	chr9	397	312	92.9945	91.6732	-1.32129	0.985792	0.282974	0.851695	NotSig	0.0803656	negligible	44.0513	44.1711	43.9314	0.237094	-0.0199531	0.994575	0.984081	0.992444	Not Sig	nonsignificant	trafficking kinesin protein 2 [Source:RGD Symbol;Acc:620915]
Atp6v1a	chr11	261	382	91.4286	98.0267	6.59812	1.07217	0.28443	0.852745	NotSig	-0.0944498	negligible	54.8585	69.935	39.782	0.240528	-3.31993	0.568843	0.000900389	0.0305949	FDR<0.05	nonsignificant	ATPase H+ transporting V1 subunit A [Source:RGD Symbol;Acc:1596464]
Samm50	chr7	86	110	71.6208	62.2159	-9.40494	0.868684	0.284783	0.852745	NotSig	0.320306	small	25.1889	26.7455	23.6323	0.296431	-0.569891	0.883598	0.568751	0.796443	Not Sig	nonsignificant	SAMM50 sorting and assembly machinery component [Source:RGD Symbol;Acc:1303219]
Kdelr1	chr1	168	177	72.6593	79.3576	6.69836	1.09219	0.28644	0.853589	NotSig	-0.170611	negligible	41.1283	40.2151	42.0415	0.237309	0.154936	1.04542	0.876872	0.942538	Not Sig	nonsignificant	KDEL endoplasmic reticulum protein retention receptor 1 [Source:RGD Symbol;Acc:1306764]
Ctbp1	chr14	274	255	76.9816	81.4729	4.49127	1.05834	0.28567	0.853589	NotSig	-0.0930043	negligible	64.6313	60.7266	68.5361	0.203894	0.888192	1.1286	0.374438	0.653783	Not Sig	nonsignificant	C-terminal binding protein 1 [Source:RGD Symbol;Acc:2441]
Dnaja1	chr5	128	166	80.3444	88.0214	7.677	1.09555	0.285428	0.853589	NotSig	-0.106984	negligible	31.4071	36.8697	25.9445	0.29813	-1.55794	0.70368	0.119247	0.375079	Not Sig	nonsignificant	DnaJ heat shock protein family (Hsp40) member A1 [Source:RGD Symbol;Acc:620942]
Cnpy2	chr7	135	155	59.7079	66.9966	7.28867	1.12207	0.285987	0.853589	NotSig	-0.133052	negligible	37.9131	36.6717	39.1545	0.241706	0.35504	1.0677	0.722559	0.876228	Not Sig	nonsignificant	canopy FGF signaling regulator 2 [Source:RGD Symbol;Acc:1589072]
Palm	chr7	226	323	77.3593	82.8066	5.44722	1.07041	0.28588	0.853589	NotSig	-0.082954	negligible	46.6431	50.8906	42.3956	0.249861	-1.24909	0.833074	0.211632	0.518188	Not Sig	nonsignificant	paralemmin [Source:RGD Symbol;Acc:620341]
Xbp1	chr14	125	136	74.6082	66.1991	-8.40909	0.88729	0.287846	0.854741	NotSig	0.181133	negligible	30.2527	32.2604	28.245	0.267656	-0.662951	0.87553	0.507362	0.751563	Not Sig	nonsignificant	X-box binding protein 1 [Source:RGD Symbol;Acc:1303073]
Tmem132a	chr1	318	327	94.079	98.0966	4.01758	1.0427	0.288068	0.854976	NotSig	-0.0551337	negligible	63.7746	61.4452	66.104	0.212169	0.440242	1.07582	0.659762	0.846472	Not Sig	nonsignificant	transmembrane protein 132A [Source:RGD Symbol;Acc:727936]
Tmcc2	chr13	249	340	59.7734	56.5126	-3.26079	0.945447	0.289039	0.85499	NotSig	0.123567	negligible	50.2579	55.0872	45.4286	0.221448	-1.37168	0.824666	0.170163	0.459191	Not Sig	nonsignificant	transmembrane and coiled-coil domain family 2 [Source:RGD Symbol;Acc:1311960]
Rusc1	chr2	110	113	92.9125	100.542	7.6299	1.08212	0.288747	0.85499	NotSig	-0.0849958	negligible	27.099	26.4766	27.7214	0.299677	0.23863	1.04701	0.811392	0.914671	Not Sig	nonsignificant
Prrc2a	chr20	186	302	75.9008	69.0497	-6.85116	0.909735	0.289048	0.85499	NotSig	0.0566452	negligible	62.555	73.3771	51.7329	0.205438	-2.62672	0.705028	0.0086211	0.104015	Not Sig	nonsignificant	proline-rich coiled-coil 2A [Source:RGD Symbol;Acc:1303025]
Dpp7	chr3	119	122	84.3502	75.5916	-8.75861	0.896164	0.288749	0.85499	NotSig	0.0878288	negligible	29.7401	26.9108	32.5694	0.271615	0.855915	1.21027	0.392045	0.666215	Not Sig	nonsignificant	dipeptidylpeptidase 7 [Source:RGD Symbol;Acc:71073]
Atp6v0b	chr5	400	463	88.8767	85.9272	-2.9495	0.966814	0.288912	0.85499	NotSig	0.0675466	negligible	32.7028	29.7762	35.6295	0.291874	1.06865	1.19658	0.285227	0.595117	Not Sig	nonsignificant	ATPase H+ transporting V0 subunit B [Source:RGD Symbol;Acc:1308303]
Gpr162	chr4	234	275	76.2334	79.3343	3.10091	1.04068	0.289259	0.855174	NotSig	-0.102737	negligible	59.2732	60.0987	58.4478	0.223496	-0.252101	0.972529	0.800963	0.907831	Not Sig	nonsignificant	G protein-coupled receptor 162 [Source:RGD Symbol;Acc:1307437]
Nrcam	chr6	410	402	104.132	105.963	1.83051	1.01758	0.289497	0.855174	NotSig	-0.0922455	negligible	29.3567	33.4925	25.2209	0.286439	-1.47006	0.753032	0.141546	0.412173	Not Sig	nonsignificant	neuronal cell adhesion molecule [Source:RGD Symbol;Acc:3209]
LOC100359937	chr8	157	146	57.2006	61.7994	4.5988	1.0804	0.289864	0.855174	NotSig	-0.112168	negligible	27.6704	25.2148	30.126	0.285119	0.896716	1.19478	0.369871	0.652338	Not Sig	nonsignificant
Atf5	chr1	182	133	65.643	70.3202	4.67714	1.07125	0.290702	0.855747	NotSig	-0.0170475	negligible	33.2755	29.641	36.91	0.272401	1.29752	1.24523	0.194451	0.498099	Not Sig	nonsignificant	activating transcription factor 5 [Source:RGD Symbol;Acc:628902]
Ap2a1	chr1	153	183	77.8437	85.5231	7.67936	1.09865	0.290382	0.855747	NotSig	-0.125763	negligible	45.2873	45.4472	45.1274	0.234652	0.0261079	0.992963	0.979171	0.991679	Not Sig	nonsignificant	adaptor related protein complex 2 subunit alpha 1 [Source:RGD Symbol;Acc:1306254]
Atp5pb	chr2	335	317	74.7815	79.9639	5.18243	1.0693	0.291527	0.856598	NotSig	-0.112484	negligible	87.8788	77.2807	98.4769	0.179353	1.9081	1.27428	0.0563781	0.24509	Not Sig	nonsignificant	ATP synthase peripheral stalk-membrane subunit b [Source:RGD Symbol;Acc:620041]
Rps19l2	chr1	1246	1014	38.951	40.1202	1.16919	1.03002	0.293459	0.85685	NotSig	-0.0359808	negligible	62.3368	48.4594	76.2142	0.277526	2.5085	1.57275	0.0121244	0.112777	Not Sig	nonsignificant
Gm2a	chr10	152	165	81.5972	85.5747	3.97751	1.04875	0.293408	0.85685	NotSig	-0.111513	negligible	28.9797	27.8747	30.0847	0.308079	0.32239	1.07928	0.747157	0.885389	Not Sig	nonsignificant	ganglioside GM2 activator [Source:RGD Symbol;Acc:628651]
Rab3a	chr16	396	488	90.117	95.0015	4.88454	1.0542	0.295591	0.85685	NotSig	-0.0444154	negligible	100.458	108.292	92.623	0.187662	-1.19043	0.855306	0.233877	0.552347	Not Sig	nonsignificant	RAB3A, member RAS oncogene family [Source:RGD Symbol;Acc:3528]
Nars1	chr18	96	133	82.5969	90.6594	8.06253	1.09761	0.296431	0.85685	NotSig	-0.198985	negligible	25.9333	29.4472	22.4194	0.298489	-1.33669	0.761343	0.181325	0.477331	Not Sig	nonsignificant	asparaginyl-tRNA synthetase 1 [Source:RGD Symbol;Acc:1307238]
Large1	chr19	145	185	79.8264	92.6698	12.8434	1.16089	0.295414	0.85685	NotSig	-0.0994297	negligible	35.7323	39.1824	32.2822	0.260161	-1.1502	0.823895	0.250062	0.568516	Not Sig	nonsignificant	LARGE xylosyl- and glucuronyltransferase 1 [Source:RGD Symbol;Acc:1308895]
Rarres2	chr4	99	95	63.0398	56.6432	-6.39657	0.898531	0.295997	0.85685	NotSig	0.172349	negligible	26.3357	22.8824	29.7889	0.30158	1.15061	1.30182	0.249894	0.568516	Not Sig	nonsignificant	retinoic acid receptor responder 2 [Source:RGD Symbol;Acc:1309874]
Gng10	chr5	252	246	64.8484	69.7984	4.95004	1.07633	0.29652	0.85685	NotSig	-0.122939	negligible	64.8577	60.2959	69.4195	0.202732	1.02346	1.15131	0.306089	0.610691	Not Sig	nonsignificant	G protein subunit gamma 10 [Source:RGD Symbol;Acc:621514]
Rap1gap	chr5	92	130	109.562	102.563	-6.99953	0.936114	0.292257	0.85685	NotSig	0.183897	negligible	25.995	27.1957	24.7942	0.287032	-0.580871	0.911694	0.561327	0.795253	Not Sig	nonsignificant	Rap1 GTPase-activating protein [Source:RGD Symbol;Acc:1309908]
Itpr1	chr4	133	188	86.9799	95.4313	8.45134	1.09716	0.29684	0.85685	NotSig	-0.118375	negligible	34.6552	37.8939	31.4165	0.273578	-0.993689	0.829064	0.320374	0.618419	Not Sig	nonsignificant	inositol 1,4,5-trisphosphate receptor, type 1 [Source:RGD Symbol;Acc:2933]
Apba2	chr1	217	303	88.2045	83.1772	-5.02733	0.943004	0.303489	0.857834	NotSig	0.0549973	negligible	44.5342	52.1048	36.9635	0.243591	-1.9983	0.709408	0.0456844	0.219368	Not Sig	nonsignificant	amyloid beta precursor protein binding family A member 2 [Source:RGD Symbol;Acc:620845]
Eif3c	chr1	102	112	73.657	85.5355	11.8785	1.16127	0.302969	0.857834	NotSig	-0.0701033	negligible	28.5807	27.1949	29.9665	0.297018	0.535334	1.10192	0.592419	0.814515	Not Sig	nonsignificant	eukaryotic translation initiation factor 3, subunit C [Source:RGD Symbol;Acc:1308871]
Scd2	chr1	3992	3869	96.7228	98.1506	1.42782	1.01476	0.30395	0.857834	NotSig	-0.0232016	negligible	415.021	467.562	362.479	0.163594	-2.24403	0.775252	0.0248302	0.159009	Not Sig	nonsignificant	stearoyl-Coenzyme A desaturase 2 [Source:RGD Symbol;Acc:621177]
Nme1	chr10	153	159	59.7247	64.824	5.09927	1.08538	0.30061	0.857834	NotSig	-0.0350971	negligible	39.4507	37.3707	41.5307	0.255063	0.521291	1.11132	0.602164	0.816815	Not Sig	nonsignificant	NME/NM23 nucleoside diphosphate kinase 1 [Source:RGD Symbol;Acc:70497]
LOC103692785	chr14	155	122	55.0826	62.5477	7.46508	1.13553	0.301025	0.857834	NotSig	-0.0909503	negligible	40.0091	33.1672	46.851	0.252056	1.97787	1.41257	0.0479434	0.222535	Not Sig	nonsignificant
Ndrg4	chr19	597	798	116.225	112.38	-3.8445	0.966922	0.298607	0.857834	NotSig	0.0367388	negligible	129.335	153.223	105.446	0.18435	-2.81489	0.688186	0.00487934	0.0776147	Not Sig	nonsignificant	NDRG family member 4 [Source:RGD Symbol;Acc:621593]
Arl2bp	chr19	331	320	88.6315	94.4246	5.79307	1.06536	0.303078	0.857834	NotSig	-0.0868614	negligible	71.9205	68.6387	75.2023	0.200711	0.71256	1.09562	0.476118	0.726614	Not Sig	nonsignificant	ADP-ribosylation factor like GTPase 2 binding protein [Source:RGD Symbol;Acc:1561471]
Chmp4b	chr3	136	151	68.2046	75.4444	7.23975	1.10615	0.298732	0.857834	NotSig	-0.115263	negligible	28.2651	28.6196	27.9106	0.29926	-0.143462	0.975227	0.885925	0.946769	Not Sig	nonsignificant	charged multivesicular body protein 4B [Source:RGD Symbol;Acc:1309846]
Ubr4	chr5	99	102	85.3737	74.8236	-10.5501	0.876424	0.303731	0.857834	NotSig	0.0859311	negligible	26.8118	26.5638	27.0599	0.29777	0.309329	1.01868	0.757071	0.89209	Not Sig	nonsignificant	ubiquitin protein ligase E3 component n-recognin 4 [Source:RGD Symbol;Acc:1563121]
Mfn2	chr5	137	168	85.2775	90.2606	4.98314	1.05843	0.30274	0.857834	NotSig	-0.127279	negligible	30.9926	35.19	26.7953	0.307062	-0.980825	0.761446	0.326679	0.623047	Not Sig	nonsignificant	mitofusin 2 [Source:RGD Symbol;Acc:628843]
Vsnl1	chr6	136	159	106.592	111.442	4.85006	1.0455	0.297721	0.857834	NotSig	-0.0974194	negligible	29.4536	31.2374	27.6697	0.320625	-0.489885	0.885789	0.624215	0.830334	Not Sig	nonsignificant	visinin-like 1 [Source:RGD Symbol;Acc:3966]
Septin2	chr9	168	163	87.3744	98.2795	10.9051	1.12481	0.304361	0.857834	NotSig	-0.0877426	negligible	32.2376	29.2103	35.2648	0.282135	0.696681	1.20727	0.486002	0.731185	Not Sig	nonsignificant	septin 2 [Source:RGD Symbol;Acc:620056]
Psenen	chr1	203	175	82.9691	89.4909	6.52173	1.0786	0.313763	0.86209	NotSig	-0.0809096	negligible	51.3508	43.2484	59.4531	0.226277	2.01172	1.37469	0.0442498	0.216694	Not Sig	nonsignificant	presenilin enhancer gamma secretase subunit [Source:RGD Symbol;Acc:1312037]
Pigq	chr10	134	167	91.2158	99.1333	7.91751	1.0868	0.310541	0.86209	NotSig	-0.0975006	negligible	32.7325	31.5993	33.8656	0.264493	0.223895	1.07172	0.822839	0.918249	Not Sig	nonsignificant	phosphatidylinositol glycan anchor biosynthesis, class Q [Source:RGD Symbol;Acc:1359535]
Prpf8	chr10	81	112	99.6279	93.5823	-6.04555	0.939319	0.312853	0.86209	NotSig	0.171958	negligible	27.9792	30.8654	25.0929	0.27923	-1.01157	0.812979	0.311746	0.611536	Not Sig	nonsignificant	pre-mRNA processing factor 8 [Source:RGD Symbol;Acc:1305467]
RGD1307929	chr10	192	172	63.8334	70.1106	6.2772	1.09834	0.307129	0.86209	NotSig	-0.0915274	negligible	40.7995	37.0971	44.5018	0.237779	1.12906	1.1996	0.258871	0.574031	Not Sig	nonsignificant
Lamp1	chr16	583	596	81.3056	85.6845	4.37895	1.05386	0.314354	0.86209	NotSig	-0.0679709	negligible	144.725	138.201	151.248	0.166436	0.81989	1.09441	0.412279	0.683915	Not Sig	nonsignificant	lysosomal-associated membrane protein 1 [Source:RGD Symbol;Acc:2989]
Selenof	chr2	435	469	87.2463	84.5424	-2.70383	0.969009	0.309106	0.86209	NotSig	0.0834401	negligible	110.903	104.655	117.151	0.173451	0.828557	1.1194	0.407355	0.68097	Not Sig	nonsignificant	selenoprotein F [Source:RGD Symbol;Acc:621291]
Mog	chr20	264	300	75.1907	80.824	5.63334	1.07492	0.313438	0.86209	NotSig	-0.0389565	negligible	84.0002	80.2883	87.7121	0.187059	0.582882	1.09246	0.559973	0.794846	Not Sig	nonsignificant	myelin oligodendrocyte glycoprotein [Source:RGD Symbol;Acc:3102]
Psap	chr20	1968	2053	103.215	106.217	3.00195	1.02908	0.313119	0.86209	NotSig	-0.0395882	negligible	501.262	479.314	523.21	0.120372	1.07441	1.09158	0.282637	0.593691	Not Sig	nonsignificant	prosaposin [Source:RGD Symbol;Acc:3423]
Grin1	chr3	509	514	105.794	112.988	7.19418	1.068	0.31439	0.86209	NotSig	-0.0538913	negligible	114.684	105.85	123.518	0.177585	1.10426	1.16692	0.269482	0.58139	Not Sig	nonsignificant	glutamate ionotropic receptor NMDA type subunit 1 [Source:RGD Symbol;Acc:2736]
Slc24a3	chr3	221	272	87.2402	80.9032	-6.33695	0.927362	0.310905	0.86209	NotSig	0.129717	negligible	43.7214	53.3521	34.0907	0.249698	-2.67245	0.638975	0.00753004	0.0997676	Not Sig	nonsignificant	solute carrier family 24 member 3 [Source:RGD Symbol;Acc:69256]
Ccn3	chr7	157	277	97.582	91.5799	-6.0021	0.938492	0.308353	0.86209	NotSig	0.0962584	negligible	34.3731	41.7462	26.9999	0.279956	-2.27917	0.646763	0.022657	0.155468	Not Sig	nonsignificant	cellular communication network factor 3 [Source:RGD Symbol;Acc:621553]
Vps28	chr7	124	125	86.4138	79.5464	-6.86747	0.920528	0.311577	0.86209	NotSig	0.0871303	negligible	30.8386	27.559	34.1182	0.282279	1.07334	1.23801	0.283118	0.593691	Not Sig	nonsignificant	VPS28 subunit of ESCRT-I [Source:RGD Symbol;Acc:1306537]
Ptprs	chr9	614	679	96.1002	100.559	4.45874	1.0464	0.312274	0.86209	NotSig	-0.0991702	negligible	148.517	149.051	147.983	0.154809	-0.000243555	0.992829	0.999806	0.999806	Not Sig	nonsignificant	protein tyrosine phosphatase, receptor type, S [Source:RGD Symbol;Acc:3452]
Huwe1	chrX	136	169	93.9594	86.7358	-7.22361	0.92312	0.308571	0.86209	NotSig	0.125112	negligible	41.4123	42.1761	40.6484	0.234321	-0.278934	0.963776	0.780296	0.896865	Not Sig	nonsignificant	HECT, UBA and WWE domain containing E3 ubiquitin protein ligase 1 [Source:RGD Symbol;Acc:1561763]
Kif1a	chr9	640	745	79.8826	83.063	3.18047	1.03981	0.315086	0.86295	NotSig	-0.0563396	negligible	60.0091	67.52	52.4983	0.212742	-1.78598	0.777522	0.0741032	0.286616	Not Sig	nonsignificant	kinesin family member 1A [Source:RGD Symbol;Acc:1304996]
Rnd2	chr10	364	341	83.3411	82.7236	-0.617441	0.992591	0.3161	0.863588	NotSig	0.0565778	negligible	95.9752	84.1762	107.774	0.179244	1.9838	1.28034	0.0472785	0.222535	Not Sig	nonsignificant	Rho family GTPase 2 [Source:RGD Symbol;Acc:1306172]
Pcbp1	chr4	174	238	75.3501	81.1425	5.79239	1.07687	0.316419	0.863588	NotSig	-0.0836375	negligible	34.7667	40.5807	28.9527	0.274047	-1.97851	0.71346	0.0478708	0.222535	Not Sig	nonsignificant	poly(rC) binding protein 1 [Source:RGD Symbol;Acc:1561319]
Hsd17b12	chr3	169	163	90.7073	96.9706	6.26325	1.06905	0.317194	0.864744	NotSig	-0.105585	negligible	41.9407	36.8928	46.9885	0.236749	1.43564	1.27365	0.151105	0.426888	Not Sig	nonsignificant	hydroxysteroid (17-beta) dehydrogenase 12 [Source:RGD Symbol;Acc:708367]
Fbxl16	chr10	419	489	75.7078	70.3027	-5.4051	0.928606	0.318173	0.864906	NotSig	0.0566339	negligible	72.5926	80.5624	64.6228	0.223955	-1.43076	0.802146	0.1525	0.428273	Not Sig	nonsignificant	F-box and leucine-rich repeat protein 16 [Source:RGD Symbol;Acc:1309127]
Ybx1	chr5	296	328	63.9221	58.9676	-4.95442	0.922493	0.318066	0.864906	NotSig	0.1187	negligible	69.1086	68.7367	69.4805	0.193509	0.0136352	1.01082	0.989121	0.995699	Not Sig	nonsignificant	Y box binding protein 1 [Source:RGD Symbol;Acc:61843]
Atp13a2	chr5	214	253	98.7992	93.8656	-4.93363	0.950064	0.31817	0.864906	NotSig	0.080748	negligible	61.1631	62.616	59.7102	0.222571	-0.349108	0.953593	0.727008	0.877094	Not Sig	nonsignificant	ATPase cation transporting 13A2 [Source:RGD Symbol;Acc:1307977]
Ankrd40	chr10	159	190	83.341	76.7278	-6.6132	0.920649	0.318673	0.865307	NotSig	0.0689731	negligible	29.6941	31.9436	27.4446	0.278309	-0.949016	0.859159	0.342613	0.631862	Not Sig	nonsignificant	ankyrin repeat domain 40 [Source:RGD Symbol;Acc:1594678]
Arf1	chr10	336	405	74.2837	79.4312	5.14749	1.0693	0.319929	0.865455	NotSig	-0.102025	negligible	91.0419	95.9881	86.0958	0.178101	-0.888785	0.896942	0.374119	0.653783	Not Sig	nonsignificant	ADP-ribosylation factor 1 [Source:RGD Symbol;Acc:621270]
Ubc	chr12	638	910	73.2637	71.1333	-2.13042	0.970921	0.320861	0.865455	NotSig	0.0480898	negligible	121.624	154.194	89.0543	0.172667	-4.53125	0.577548	5.86344e-06	0.00244066	FDR<0.05	nonsignificant	ubiquitin C [Source:RGD Symbol;Acc:621244]
Saraf	chr16	405	408	74.314	77.3763	3.06239	1.04121	0.320552	0.865455	NotSig	-0.0937437	negligible	101.36	94.0534	108.667	0.179982	1.1245	1.15537	0.260799	0.574379	Not Sig	nonsignificant	store-operated calcium entry-associated regulatory factor [Source:RGD Symbol;Acc:1303011]
Pigt	chr3	156	173	87.6148	93.2065	5.59169	1.06382	0.321237	0.865455	NotSig	-0.173517	negligible	42.7257	43.7428	41.7085	0.240083	-0.0564209	0.953494	0.955006	0.980605	Not Sig	nonsignificant	phosphatidylinositol glycan anchor biosynthesis, class T [Source:RGD Symbol;Acc:1307156]
Slco1c1	chr4	114	129	78.1098	72.7474	-5.3624	0.931348	0.320691	0.865455	NotSig	0.178538	negligible	32.9961	32.7855	33.2067	0.286966	0.0123717	1.01285	0.990129	0.996112	Not Sig	nonsignificant	solute carrier organic anion transporter family, member 1c1 [Source:RGD Symbol;Acc:628660]
RGD1559909	chr5	280	270	64.6989	68.4226	3.72369	1.05755	0.319009	0.865455	NotSig	-0.0774579	negligible	65.2241	57.9188	72.5294	0.207359	1.5186	1.25226	0.128862	0.39472	Not Sig	nonsignificant
Hnrnpa3	chr3	210	245	87.7678	93.1865	5.41869	1.06174	0.322256	0.865899	NotSig	-0.0451588	negligible	35.7263	39.0572	32.3954	0.248156	-1.07964	0.829434	0.280301	0.590915	Not Sig	nonsignificant	heterogeneous nuclear ribonucleoprotein A3 [Source:RGD Symbol;Acc:727807]
Atp1a3	chr1	1778	2171	104.324	106.768	2.44398	1.02343	0.32393	0.86624	NotSig	-0.0337168	negligible	537.402	543.333	531.471	0.133275	-0.235934	0.978168	0.813484	0.915169	Not Sig	nonsignificant	ATPase Na+/K+ transporting subunit alpha 3 [Source:RGD Symbol;Acc:2169]
Dbn1	chr17	212	223	112.147	106.943	-5.20345	0.953601	0.324971	0.866727	NotSig	0.104911	negligible	57.4333	54.434	60.4327	0.219414	0.658258	1.1102	0.510373	0.753343	Not Sig	nonsignificant	drebrin 1 [Source:RGD Symbol;Acc:70885]
Sncb	chr17	269	332	85.2381	90.6657	5.42763	1.06368	0.324706	0.866727	NotSig	-0.0555749	negligible	70.3361	72.223	68.4493	0.219123	-0.417306	0.947749	0.676454	0.855065	Not Sig	nonsignificant	synuclein, beta [Source:RGD Symbol;Acc:70992]
Pip5k1c	chr7	205	313	95.567	102.938	7.37076	1.07713	0.325023	0.866727	NotSig	-0.13267	negligible	37.9405	47.2006	28.6804	0.2719	-2.71979	0.607627	0.00653229	0.0945762	Not Sig	nonsignificant	phosphatidylinositol-4-phosphate 5-kinase type 1 gamma [Source:RGD Symbol;Acc:1309938]
Hspa5	chr3	459	526	68.5397	73.1074	4.56778	1.06664	0.325569	0.867218	NotSig	-0.0299526	negligible	104.314	108.071	100.557	0.183421	-0.605365	0.930467	0.544936	0.78109	Not Sig	nonsignificant	heat shock protein family A (Hsp70) member 5 [Source:RGD Symbol;Acc:2843]
Cdc42se2	chr10	175	185	64.9706	71.1971	6.22657	1.09584	0.326396	0.867704	NotSig	-0.0708199	negligible	35.2901	33.8684	36.7118	0.255482	0.228556	1.08396	0.819214	0.91738	Not Sig	nonsignificant	CDC42 small effector 2 [Source:RGD Symbol;Acc:1563924]
Ubl7	chr8	95	119	74.2622	80.2574	5.99519	1.08073	0.327666	0.868183	NotSig	-0.108995	negligible	26.4624	27.3778	25.5469	0.287372	-0.324642	0.933125	0.745452	0.885389	Not Sig	nonsignificant	ubiquitin-like 7 [Source:RGD Symbol;Acc:1303055]
Ewsr1	chr14	124	155	119.898	117.138	-2.76007	0.97698	0.32987	0.869257	NotSig	0.106175	negligible	40.2902	41.7687	38.8117	0.239899	-0.327397	0.929206	0.743368	0.885342	Not Sig	nonsignificant	EWS RNA-binding protein 1 [Source:RGD Symbol;Acc:1307258]
Pfkm	chr7	376	442	87.816	94.0242	6.20821	1.0707	0.330756	0.870441	NotSig	-0.0716019	negligible	108.415	107.291	109.54	0.168838	0.220511	1.02097	0.825473	0.918942	Not Sig	nonsignificant	phosphofructokinase, muscle [Source:RGD Symbol;Acc:68419]
Rplp0	chr12	1833	1637	53.2632	54.7781	1.51491	1.02844	0.332877	0.871799	NotSig	-0.0349845	negligible	475.287	410.875	539.698	0.164373	2.39265	1.31353	0.016727	0.135197	Not Sig	nonsignificant	ribosomal protein lateral stalk subunit P0 [Source:RGD Symbol;Acc:621247]
Clu	chr15	1706	1613	88.4715	87.3402	-1.13127	0.987213	0.332073	0.871799	NotSig	0.0456838	negligible	458.218	407.026	509.409	0.134656	2.40964	1.25154	0.0159681	0.131619	Not Sig	nonsignificant	clusterin [Source:RGD Symbol;Acc:3907]
Aars1	chr19	131	176	82.7855	89.0711	6.28559	1.07593	0.332473	0.871799	NotSig	-0.138743	negligible	39.187	42.2986	36.0754	0.238965	-0.921765	0.852874	0.356651	0.641666	Not Sig	nonsignificant	alanyl-tRNA synthetase 1 [Source:RGD Symbol;Acc:1304832]
Map1lc3b	chr19	284	277	85.5505	89.9994	4.44885	1.052	0.332386	0.871799	NotSig	-0.0593643	negligible	69.7254	62.7144	76.7364	0.192991	1.41249	1.22359	0.157804	0.435817	Not Sig	nonsignificant	microtubule-associated protein 1 light chain 3 beta [Source:RGD Symbol;Acc:621315]
C1qb	chr5	181	167	80.623	85.4144	4.79141	1.05943	0.334931	0.873175	NotSig	-0.070442	negligible	41.8197	37.4044	46.2351	0.237698	1.30536	1.23609	0.191769	0.4958	Not Sig	nonsignificant	complement C1q B chain [Source:RGD Symbol;Acc:2229]
Cox7a2l2	chr14	325	317	65.0638	69.0161	3.9523	1.06075	0.33523	0.873395	NotSig	-0.120944	negligible	111.52	104.047	118.992	0.178354	1.04739	1.14363	0.294921	0.602507	Not Sig	nonsignificant
Atf6b	chr20	129	134	110.161	100.06	-10.1013	0.908304	0.335823	0.873983	NotSig	0.110134	negligible	32.9683	30.0101	35.9266	0.259873	0.879437	1.19715	0.379164	0.656246	Not Sig	nonsignificant	activating transcription factor 6 beta [Source:RGD Symbol;Acc:1303317]
Hbb-b1	chr1	4120	3215	35.232	35.7332	0.501208	1.01423	0.337664	0.874287	NotSig	-0.014043	negligible	1098.79	917.168	1280.42	0.504114	0.956557	1.39606	0.338791	0.630969	Not Sig	nonsignificant
Mxi1	chr1	143	112	83.0941	71.2118	-11.8823	0.857002	0.336731	0.874287	NotSig	0.0926705	negligible	25.1754	22.2766	28.0741	0.301709	0.835064	1.26025	0.403682	0.67791	Not Sig	nonsignificant	MAX interactor 1, dimerization protein [Source:RGD Symbol;Acc:3128]
Ndrg2	chr15	3229	2569	81.56	82.7749	1.21494	1.0149	0.340756	0.874287	NotSig	-0.01806	negligible	681.504	576.562	786.447	0.111862	4.0454	1.36403	5.22329e-05	0.00725817	FDR<0.05	nonsignificant	NDRG family member 2 [Source:RGD Symbol;Acc:621874]
Tspan17	chr17	156	178	79.084	85.4557	6.37168	1.08057	0.340037	0.874287	NotSig	-0.114497	negligible	45.2361	45.0962	45.376	0.239334	0.216632	1.00621	0.828495	0.921473	Not Sig	nonsignificant	tetraspanin 17 [Source:RGD Symbol;Acc:1311167]
Adgrl1	chr19	397	508	91.4344	85.9574	-5.47699	0.940099	0.34113	0.874287	NotSig	0.0542429	negligible	35.3109	40.5157	30.1061	0.273086	-1.57326	0.743074	0.115658	0.373198	Not Sig	nonsignificant	adhesion G protein-coupled receptor L1 [Source:RGD Symbol;Acc:620768]
Uqcc2	chr20	166	142	65.4336	60.9235	-4.51015	0.931073	0.340537	0.874287	NotSig	0.17259	negligible	38.9416	34.5996	43.2836	0.253023	1.46289	1.25099	0.143496	0.415653	Not Sig	nonsignificant	ubiquinol-cytochrome c reductase complex assembly factor 2 [Source:RGD Symbol;Acc:1306917]
B2m	chr3	994	939	86.0837	87.4097	1.32607	1.0154	0.338699	0.874287	NotSig	-0.0408409	negligible	147.607	130.467	164.747	0.172977	1.9464	1.26275	0.0516062	0.232228	Not Sig	nonsignificant	beta-2 microglobulin [Source:RGD Symbol;Acc:2189]
Bcat1	chr4	428	706	119.158	125.01	5.85268	1.04912	0.337914	0.874287	NotSig	-0.0535778	negligible	117.702	142.655	92.7493	0.164521	-3.81248	0.650166	0.00013758	0.0134747	FDR<0.05	nonsignificant	branched chain amino acid transaminase 1 [Source:RGD Symbol;Acc:2195]
Scp2	chr5	500	442	83.5933	86.1423	2.54897	1.03049	0.340576	0.874287	NotSig	-0.0393042	negligible	65.9959	57.2898	74.7021	0.210602	1.77501	1.30393	0.0758959	0.289832	Not Sig	nonsignificant	sterol carrier protein 2 [Source:RGD Symbol;Acc:3642]
Pja2	chr9	310	492	90.0837	95.6298	5.54616	1.06157	0.339797	0.874287	NotSig	-0.104328	negligible	56.8068	74.93	38.6836	0.215074	-4.35704	0.516263	1.31836e-05	0.00274383	FDR<0.05	nonsignificant	praja ring finger ubiquitin ligase 2 [Source:RGD Symbol;Acc:620273]
Cbarp	chr7	318	439	84.2516	87.1656	2.914	1.03459	0.344943	0.876296	NotSig	-0.0346044	negligible	77.7502	89.8803	65.6201	0.20091	-2.13679	0.730083	0.0326152	0.187278	Not Sig	nonsignificant	CACN subunit beta associated regulatory protein [Source:RGD Symbol;Acc:1307185]
Rabac1	chr1	439	484	76.511	72.589	-3.92208	0.948738	0.346838	0.876451	NotSig	0.0690992	negligible	124.518	117.813	131.224	0.157454	1.01695	1.11383	0.309175	0.611536	Not Sig	nonsignificant	Rab acceptor 1 [Source:RGD Symbol;Acc:621002]
Tm2d3	chr1	86	99	69.5467	77.0585	7.51181	1.10801	0.349986	0.876451	NotSig	-0.154628	negligible	25.9792	26.6324	25.3261	0.289242	-0.090008	0.95095	0.928281	0.967807	Not Sig	nonsignificant	TM2 domain containing 3 [Source:RGD Symbol;Acc:1564929]
Syngr3	chr10	208	227	106.961	116.08	9.11893	1.08525	0.35003	0.876451	NotSig	-0.0668551	negligible	54.2876	52.3217	56.2535	0.23563	0.346755	1.07515	0.728776	0.877094	Not Sig	nonsignificant	synaptogyrin 3 [Source:RGD Symbol;Acc:1311801]
Ppp3r1	chr14	326	361	86.8486	92.0818	5.23324	1.06026	0.348038	0.876451	NotSig	-0.0795254	negligible	43.9765	52.9813	34.9718	0.261002	-2.17139	0.660077	0.0299017	0.176804	Not Sig	nonsignificant	protein phosphatase 3, regulatory subunit B, alpha [Source:RGD Symbol;Acc:69230]
Tecr	chr19	927	987	71.9641	74.1653	2.20119	1.03059	0.349754	0.876451	NotSig	-0.0199158	negligible	222.601	215.292	229.909	0.149464	0.669118	1.0679	0.50342	0.747021	Not Sig	nonsignificant	trans-2,3-enoyl-CoA reductase [Source:RGD Symbol;Acc:620376]
Tcf25	chr19	288	307	85.1277	92.7693	7.64163	1.08977	0.346308	0.876451	NotSig	-0.0112515	negligible	71.7499	65.584	77.9158	0.190563	1.24988	1.18803	0.211344	0.518188	Not Sig	nonsignificant	transcription factor 25 [Source:RGD Symbol;Acc:1309054]
Vstm2l	chr3	196	257	85.0602	90.0275	4.96734	1.0584	0.347258	0.876451	NotSig	-0.095142	negligible	51.9873	54.4084	49.5662	0.225531	-0.556926	0.911003	0.577578	0.804069	Not Sig	nonsignificant	V-set and transmembrane domain containing 2 like [Source:RGD Symbol;Acc:1305725]
C1qa	chr5	242	202	77.7456	82.1992	4.45355	1.05728	0.350285	0.876451	NotSig	-0.112983	negligible	53.1045	44.3517	61.8573	0.22131	2.21058	1.3947	0.0270648	0.16752	Not Sig	nonsignificant	complement C1q A chain [Source:RGD Symbol;Acc:1306716]
Plxnb1	chr8	168	120	112.01	107.817	-4.19375	0.962559	0.347929	0.876451	NotSig	0.123014	negligible	25.1912	22.3644	28.018	0.309788	1.03985	1.25279	0.298411	0.606334	Not Sig	nonsignificant	plexin B1 [Source:RGD Symbol;Acc:1310564]
Snrpd2	chr1	230	173	54.6983	58.3383	3.64003	1.06655	0.351622	0.877016	NotSig	-0.121246	negligible	50.5111	39.2274	61.7948	0.248704	2.64691	1.5753	0.00812321	0.103119	Not Sig	nonsignificant	small nuclear ribonucleoprotein D2 polypeptide [Source:RGD Symbol;Acc:1593018]
Mapk8ip2	chr7	423	430	96.0325	91.9717	-4.06085	0.957714	0.351427	0.877016	NotSig	0.0776022	negligible	27.5218	34.9959	20.0476	0.300131	-2.64702	0.572856	0.00812052	0.103119	Not Sig	nonsignificant	mitogen-activated protein kinase 8 interacting protein 2 [Source:RGD Symbol;Acc:1309727]
Slc3a2	chr1	231	226	78.6252	72.7978	-5.8274	0.925884	0.352816	0.877476	NotSig	0.139455	negligible	61.202	56.1744	66.2296	0.208766	1.06262	1.179	0.287954	0.595896	Not Sig	nonsignificant	solute carrier family 3 member 2 [Source:RGD Symbol;Acc:3073]
Pkp4	chr3	360	356	85.9919	90.2035	4.21164	1.04898	0.35283	0.877476	NotSig	-0.0547949	negligible	81.5691	77.2398	85.8984	0.200429	0.742968	1.1121	0.457501	0.709692	Not Sig	nonsignificant	plakophilin 4 [Source:RGD Symbol;Acc:1307840]
Sat1	chrX	218	234	79.2517	88.741	9.4893	1.11974	0.353313	0.878055	NotSig	-0.0880941	negligible	63.7155	60.4142	67.0168	0.222002	0.779279	1.10929	0.435815	0.696459	Not Sig	nonsignificant	spermidine/spermine N1-acetyl transferase 1 [Source:RGD Symbol;Acc:1586174]
Rpl13	chr19	948	791	53.091	55.3281	2.23714	1.04214	0.354733	0.878875	NotSig	-0.0412863	negligible	67.8112	53.6946	81.9278	0.198755	3.04638	1.52581	0.00231612	0.0528266	Not Sig	nonsignificant	ribosomal protein L13 [Source:RGD Symbol;Acc:621179]
LOC100360057	chr4	279	264	51.4473	54.9393	3.49195	1.06787	0.355142	0.879082	NotSig	-0.104437	negligible	84.0553	69.7537	98.3569	0.189148	2.58523	1.41006	0.00973152	0.108779	Not Sig	nonsignificant
Rpl11	chr5	584	560	51.6459	53.6563	2.01043	1.03893	0.356068	0.879198	NotSig	-0.0404372	negligible	132.51	113.133	151.887	0.183429	2.25303	1.34255	0.0242571	0.157881	Not Sig	nonsignificant	ribosomal protein L11 [Source:RGD Symbol;Acc:1308681]
Tf	chr8	467	463	68.7445	72.7028	3.95824	1.05758	0.356482	0.879198	NotSig	-0.0389887	negligible	125.47	111.764	139.175	0.163088	1.92617	1.24526	0.0540829	0.240783	Not Sig	nonsignificant	transferrin [Source:RGD Symbol;Acc:3845]
Mgrn1	chr10	168	199	87.1789	83.5115	-3.66744	0.957932	0.355775	0.879198	NotSig	0.0933963	negligible	36.6012	40.5216	32.6809	0.264988	-1.14748	0.806505	0.251184	0.568516	Not Sig	nonsignificant	mahogunin ring finger 1 [Source:RGD Symbol;Acc:1311862]
Serpinh1	chr1	136	126	59.6576	55.7352	-3.92236	0.934252	0.356952	0.879814	NotSig	0.0995568	negligible	31.567	30.4468	32.6871	0.275639	0.495303	1.07358	0.620386	0.828343	Not Sig	nonsignificant	serpin family H member 1 [Source:RGD Symbol;Acc:69302]
Marchf2	chr7	268	240	72.3721	75.7279	3.35579	1.04637	0.35774	0.879924	NotSig	-0.021211	negligible	67.4822	61.2971	73.6672	0.214065	1.37687	1.20181	0.168552	0.455583	Not Sig	nonsignificant	membrane associated ring-CH-type finger 2 [Source:RGD Symbol;Acc:1306395]
Psma4	chr8	122	133	97.9072	108.812	10.9052	1.11138	0.358255	0.879924	NotSig	-0.0716716	negligible	31.2934	30.1632	32.4236	0.281143	0.390906	1.07494	0.695867	0.865286	Not Sig	nonsignificant	proteasome 20S subunit alpha 4 [Source:RGD Symbol;Acc:61846]
Golga7	chr16	212	205	72.759	76.1728	3.41386	1.04692	0.35924	0.880345	NotSig	-0.0453303	negligible	51.6466	46.9186	56.3746	0.218084	1.34178	1.20154	0.179669	0.476183	Not Sig	nonsignificant	golgin A7 [Source:RGD Symbol;Acc:1359725]
Akt1	chr6	170	199	66.1935	71.0211	4.82751	1.07293	0.360686	0.881349	NotSig	-0.114355	negligible	45.0567	46.2543	43.859	0.228118	-0.360659	0.948213	0.718354	0.872517	Not Sig	nonsignificant	AKT serine/threonine kinase 1 [Source:RGD Symbol;Acc:2081]
Usp14	chr18	90	101	79.9733	90.8845	10.9111	1.13643	0.360794	0.881387	NotSig	-0.164874	negligible	25.0554	24.4301	25.6807	0.289531	0.204026	1.05119	0.838333	0.928048	Not Sig	nonsignificant	ubiquitin specific peptidase 14 [Source:RGD Symbol;Acc:1311825]
Sqstm1	chr10	354	486	87.3934	83.9483	-3.44513	0.960579	0.363094	0.881554	NotSig	0.0514892	negligible	108.372	124.213	92.5301	0.175902	-2.26531	0.74493	0.0234935	0.155468	Not Sig	nonsignificant	sequestosome 1 [Source:RGD Symbol;Acc:69287]
RGD1310352	chr10	100	131	79.6473	85.7568	6.10949	1.07671	0.364339	0.881554	NotSig	-0.117493	negligible	27.1679	28.7633	25.5724	0.291582	-0.537622	0.889065	0.590838	0.813118	Not Sig	nonsignificant
Atp5mf	chr12	670	674	65.372	67.4221	2.05012	1.03136	0.365629	0.881554	NotSig	-0.0387828	negligible	169.174	154.148	184.201	0.158396	1.60018	1.19496	0.109559	0.364104	Not Sig	nonsignificant	ATP synthase membrane subunit f [Source:RGD Symbol;Acc:1596067]
Use1	chr16	130	123	55.6161	63.5398	7.92374	1.14247	0.366338	0.881554	NotSig	-0.163424	negligible	33.8164	29.6237	38.009	0.268032	1.34021	1.28306	0.180177	0.476183	Not Sig	nonsignificant	unconventional SNARE in the ER 1 [Source:RGD Symbol;Acc:1306660]
Cx3cl1	chr19	478	668	88.979	91.612	2.63305	1.02959	0.36442	0.881554	NotSig	-0.0549522	negligible	55.5801	73.9826	37.1775	0.27251	-3.70706	0.502516	0.000209679	0.016947	FDR<0.05	nonsignificant	C-X3-C motif chemokine ligand 1 [Source:RGD Symbol;Acc:620458]
RGD1561113	chr3	199	173	83.5265	88.2465	4.72006	1.05651	0.370681	0.881554	NotSig	-0.0646468	negligible	49.7205	42.4531	56.9879	0.227803	1.85893	1.34237	0.0630371	0.264375	Not Sig	nonsignificant
Ndufs3	chr3	132	142	68.1931	74.2396	6.04647	1.08867	0.370423	0.881554	NotSig	-0.108062	negligible	36.4364	35.4554	37.4174	0.267254	0.429072	1.05534	0.667871	0.850807	Not Sig	nonsignificant	NADH:ubiquinone oxidoreductase core subunit S3 [Source:RGD Symbol;Acc:1309406]
Chgb	chr3	499	479	79.4424	77.3338	-2.10857	0.973458	0.364062	0.881554	NotSig	0.0574427	negligible	62.5275	59.7929	65.262	0.23788	0.41003	1.09147	0.681784	0.857597	Not Sig	nonsignificant	chromogranin B [Source:RGD Symbol;Acc:2339]
Stmp1	chr4	154	115	55.143	59.5435	4.4005	1.0798	0.370714	0.881554	NotSig	-0.0325557	negligible	36.6143	30.2673	42.9613	0.276657	1.95865	1.4194	0.0501532	0.228781	Not Sig	nonsignificant
Snx17	chr6	113	125	75.4501	81.0822	5.63214	1.07465	0.371468	0.881554	NotSig	-0.155585	negligible	31.2249	28.8764	33.5733	0.268962	0.757531	1.16266	0.448732	0.698648	Not Sig	nonsignificant	sorting nexin 17 [Source:RGD Symbol;Acc:1306424]
Maf1	chr7	134	136	72.99	80.0487	7.05877	1.09671	0.37049	0.881554	NotSig	-0.0572446	negligible	38.1325	37.7398	38.5252	0.268646	0.29835	1.02081	0.765436	0.896076	Not Sig	nonsignificant	MAF1 homolog, negative regulator of RNA polymerase III [Source:RGD Symbol;Acc:1359315]
Pfdn5	chr7	182	144	58.4396	62.2228	3.78321	1.06474	0.366242	0.881554	NotSig	-0.114204	negligible	41.7098	33.8467	49.5729	0.237939	2.26957	1.46463	0.0232334	0.155468	Not Sig	nonsignificant	prefoldin subunit 5 [Source:RGD Symbol;Acc:1311436]
Pgk1	chrX	424	513	91.6939	95.5185	3.82454	1.04171	0.367275	0.881554	NotSig	-0.077057	negligible	126.638	130.78	122.496	0.172004	-0.553282	0.936656	0.58007	0.806191	Not Sig	nonsignificant	phosphoglycerate kinase 1 [Source:RGD Symbol;Acc:619878]
Septin4	chr10	223	183	110.035	104.051	-5.98392	0.945618	0.373712	0.88334	NotSig	0.104259	negligible	52.4027	44.4287	60.3768	0.230289	1.99799	1.35896	0.045718	0.219368	Not Sig	nonsignificant	septin 4 [Source:RGD Symbol;Acc:1308781]
Nptx1	chr10	318	413	87.7042	93.056	5.3518	1.06102	0.374709	0.88334	NotSig	-0.081649	negligible	26.1386	36.2673	16.0099	0.345956	-3.4769	0.441443	0.000507255	0.0241309	FDR<0.05	downregulated	neuronal pentraxin 1 [Source:RGD Symbol;Acc:628894]
Fis1	chr12	365	286	70.8099	73.8147	3.00481	1.04243	0.373686	0.88334	NotSig	-0.0590883	negligible	89.2641	73.3394	105.189	0.219717	2.47176	1.43428	0.0134451	0.117205	Not Sig	nonsignificant	fission, mitochondrial 1 [Source:RGD Symbol;Acc:1306668]
Dnm1	chr3	705	1088	118.913	123.191	4.27809	1.03598	0.373941	0.88334	NotSig	-0.00213433	negligible	222.302	257.598	187.006	0.172923	-2.63214	0.725961	0.00848488	0.103119	Not Sig	nonsignificant	dynamin 1 [Source:RGD Symbol;Acc:71096]
Tmem176a	chr4	108	119	67.7809	71.1389	3.35792	1.04954	0.374291	0.88334	NotSig	0.0536398	negligible	30.6653	29.4093	31.9214	0.270369	0.379009	1.08542	0.704681	0.867821	Not Sig	nonsignificant	transmembrane protein 176A [Source:RGD Symbol;Acc:1310725]
Agtpbp1	chr17	97	120	88.9633	96.0154	7.05214	1.07927	0.375509	0.884042	NotSig	-0.135283	negligible	27.8297	26.9502	28.7092	0.287829	0.448208	1.06527	0.654003	0.846088	Not Sig	nonsignificant	ATP/GTP binding carboxypeptidase 1 [Source:RGD Symbol;Acc:1306307]
Chmp5	chr5	124	112	80.4029	87.8822	7.4792	1.09302	0.376645	0.884694	NotSig	-0.0656046	negligible	29.7703	27.2175	32.3231	0.276722	0.927928	1.18759	0.353445	0.640399	Not Sig	nonsignificant	charged multivesicular body protein 5 [Source:RGD Symbol;Acc:1305968]
Dst	chr9	234	223	102.097	108.605	6.50742	1.06374	0.377469	0.885024	NotSig	-0.0631933	negligible	49.5713	48.0429	51.0996	0.221888	0.481584	1.06363	0.630102	0.83162	Not Sig	nonsignificant	dystonin [Source:RGD Symbol;Acc:1306566]
Mff	chr9	267	219	78.4282	82.9258	4.49751	1.05735	0.377479	0.885024	NotSig	-0.0407453	negligible	60.5879	49.1513	72.0244	0.216559	2.46215	1.46536	0.0138108	0.119765	Not Sig	nonsignificant	mitochondrial fission factor [Source:RGD Symbol;Acc:1310230]
Aldh7a1	chr18	126	109	76.299	84.2057	7.90673	1.10363	0.37972	0.885525	NotSig	-0.0725722	negligible	26.7587	24.9805	28.537	0.309858	0.909637	1.14237	0.363014	0.647822	Not Sig	nonsignificant	aldehyde dehydrogenase 7 family, member A1 [Source:RGD Symbol;Acc:1308614]
Syt1	chr7	594	826	102.716	100.356	-2.36004	0.977024	0.379648	0.885525	NotSig	0.0665292	negligible	83.9043	111.973	55.836	0.23429	-4.2545	0.498658	2.09513e-05	0.003876	FDR<0.05	downregulated	synaptotagmin 1 [Source:RGD Symbol;Acc:3803]
Pitpna	chr10	201	210	86.4507	83.3391	-3.11158	0.964007	0.383755	0.888055	NotSig	0.112878	negligible	33.1221	32.106	34.1383	0.255556	0.367318	1.0633	0.713382	0.871446	Not Sig	nonsignificant	phosphatidylinositol transfer protein, alpha [Source:RGD Symbol;Acc:61885]
Map2k2	chr7	136	115	59.9909	64.8583	4.86732	1.08113	0.383877	0.888055	NotSig	-0.0850922	negligible	32.4947	28.9065	36.0828	0.271801	1.4478	1.24826	0.147673	0.422824	Not Sig	nonsignificant	mitogen activated protein kinase kinase 2 [Source:RGD Symbol;Acc:61888]
Fkbp8	chr16	368	383	74.3479	77.2169	2.869	1.03859	0.384206	0.888141	NotSig	-0.0879538	negligible	97.9186	92.8661	102.971	0.192209	0.761993	1.10881	0.446064	0.698648	Not Sig	nonsignificant	FKBP prolyl isomerase 8 [Source:RGD Symbol;Acc:1308670]
Pfkl	chr20	119	183	89.6528	95.26	5.60719	1.06254	0.384383	0.888141	NotSig	-0.0969434	negligible	38.8989	43.6643	34.1335	0.246962	-1.50739	0.781726	0.131711	0.396335	Not Sig	nonsignificant	phosphofructokinase, liver type [Source:RGD Symbol;Acc:3311]
Car2	chr2	294	308	71.3075	77.5595	6.25199	1.08768	0.384754	0.888432	NotSig	-0.0656214	negligible	73.0172	69.0867	76.9478	0.204908	0.813235	1.11379	0.416083	0.684659	Not Sig	nonsignificant	carbonic anhydrase 2 [Source:RGD Symbol;Acc:2240]
Micu1	chr20	179	158	81.0822	86.7904	5.70821	1.0704	0.385509	0.888432	NotSig	-0.185609	negligible	40.3419	34.5028	46.1809	0.239822	1.69915	1.33847	0.0892909	0.3211	Not Sig	nonsignificant	mitochondrial calcium uptake 1 [Source:RGD Symbol;Acc:735033]
Cldn5	chr11	180	163	71.8606	75.6515	3.7909	1.05275	0.386896	0.888815	NotSig	-0.0920301	negligible	33.2497	30.0041	36.4952	0.310015	0.818598	1.21634	0.413016	0.683915	Not Sig	nonsignificant
Dctn2	chr7	148	170	80.3502	86.1836	5.83339	1.0726	0.387637	0.889444	NotSig	-0.0558843	negligible	38.613	37.2966	39.9293	0.252332	0.286842	1.07059	0.774233	0.896501	Not Sig	nonsignificant	dynactin subunit 2 [Source:RGD Symbol;Acc:1303182]
Actr1a	chr1	137	148	85.4601	91.5345	6.07439	1.07108	0.390831	0.890412	NotSig	-0.129756	negligible	26.3298	27.3273	25.3324	0.290563	-0.346867	0.927002	0.728691	0.877094	Not Sig	nonsignificant	actin related protein 1A [Source:RGD Symbol;Acc:1307025]
Atp5mk	chr1	84	63	71.5844	76.2093	4.62489	1.06461	0.390214	0.890412	NotSig	-0.144828	negligible	80.249	63.0946	97.4033	0.220152	2.84106	1.54377	0.00449633	0.0772914	Not Sig	nonsignificant	ATP synthase membrane subunit K [Source:RGD Symbol;Acc:631426]
Amph	chr17	108	159	100.707	111.86	11.1524	1.11074	0.389844	0.890412	NotSig	-0.0525707	negligible	28.8928	33.7872	23.9983	0.282789	-1.82452	0.710278	0.0680737	0.274438	Not Sig	nonsignificant
Mtch1	chr20	637	634	79.3996	82.6064	3.20686	1.04039	0.38993	0.890412	NotSig	-0.0812044	negligible	160.635	145.536	175.734	0.153226	1.75174	1.2075	0.0798182	0.299994	Not Sig	nonsignificant	mitochondrial carrier 1 [Source:RGD Symbol;Acc:1309262]
Acsl3	chr9	312	325	93.0645	87.9683	-5.09619	0.94524	0.390924	0.890412	NotSig	0.0506807	negligible	72.5688	68.3515	76.786	0.217904	0.714517	1.1234	0.474907	0.725558	Not Sig	nonsignificant	acyl-CoA synthetase long-chain family member 3 [Source:RGD Symbol;Acc:70552]
Alox15	chr10	449	378	39.9062	40.6398	0.733603	1.01838	0.39147	0.890724	NotSig	-0.0106408	negligible	122.119	105.974	138.264	0.345888	1.12456	1.30469	0.260775	0.574379	Not Sig	nonsignificant	arachidonate 15-lipoxygenase [Source:RGD Symbol;Acc:70493]
Ptprn2	chr6	158	176	97.4486	103.349	5.90078	1.06055	0.3918	0.890865	NotSig	-0.100069	negligible	31.9914	32.4228	31.5601	0.293291	-0.294294	0.973392	0.768533	0.896076	Not Sig	nonsignificant	protein tyrosine phosphatase, receptor type N2 [Source:RGD Symbol;Acc:61904]
Arl6ip1	chr1	333	363	96.5888	102.406	5.81695	1.06022	0.393798	0.891047	NotSig	-0.107503	negligible	80.2299	81.0739	79.3859	0.197781	-0.196889	0.979179	0.843914	0.930411	Not Sig	nonsignificant	ADP-ribosylation factor like GTPase 6 interacting protein 1 [Source:RGD Symbol;Acc:735205]
Ctsf	chr1	115	115	103.218	94.957	-8.26112	0.919964	0.392407	0.891047	NotSig	0.095023	negligible	30.4276	27.6699	33.1853	0.291426	0.791071	1.19933	0.428903	0.693909	Not Sig	nonsignificant	cathepsin F [Source:RGD Symbol;Acc:1308181]
Ube2d3	chr2	191	172	73.1485	79.8301	6.68166	1.09134	0.394482	0.891047	NotSig	-0.0403596	negligible	32.2446	28.8122	35.6771	0.270377	0.886006	1.23826	0.375614	0.653783	Not Sig	nonsignificant	ubiquitin-conjugating enzyme E2D 3 [Source:RGD Symbol;Acc:619912]
Nudt3	chr20	646	569	82.207	85.4221	3.21509	1.03911	0.392913	0.891047	NotSig	-0.0367407	negligible	112.291	100.739	123.843	0.174856	1.74278	1.22934	0.0813722	0.303804	Not Sig	nonsignificant	nudix hydrolase 3 [Source:RGD Symbol;Acc:1310183]
Cyp51	chr4	411	482	88.5989	91.8328	3.23392	1.0365	0.394944	0.891047	NotSig	-0.0562591	negligible	72.2538	76.4586	68.0489	0.204437	-0.988218	0.89001	0.323046	0.621817	Not Sig	nonsignificant	cytochrome P450, family 51 [Source:RGD Symbol;Acc:2481]
Lpar1	chr5	235	221	64.8001	63.7737	-1.02647	0.984159	0.394084	0.891047	NotSig	0.111491	negligible	31.9432	30.343	33.5435	0.288385	0.352709	1.10548	0.724306	0.876432	Not Sig	nonsignificant	lysophosphatidic acid receptor 1 [Source:RGD Symbol;Acc:620563]
Rpl36al	chr6	302	278	54.7501	58.2877	3.53763	1.06461	0.393983	0.891047	NotSig	-0.100334	negligible	73.6663	61.6851	85.6475	0.211474	2.02375	1.38847	0.0429963	0.214338	Not Sig	nonsignificant	ribosomal protein L36A-like [Source:RGD Symbol;Acc:621156]
Srsf5	chr6	157	178	147.066	138.04	-9.02618	0.938625	0.393372	0.891047	NotSig	0.0809613	negligible	41.5634	42.0924	41.0343	0.239092	-0.0721635	0.974863	0.942472	0.97405	Not Sig	nonsignificant	serine and arginine rich splicing factor 5 [Source:RGD Symbol;Acc:3664]
Wbp2	chr10	255	301	86.8342	90.6576	3.82341	1.04403	0.397049	0.892138	NotSig	-0.0820641	negligible	60.5832	63.1099	58.0566	0.220406	-0.486509	0.919929	0.626606	0.830653	Not Sig	nonsignificant	WW domain binding protein 2 [Source:RGD Symbol;Acc:620032]
Ctsb	chr15	745	721	84.3094	87.6027	3.29331	1.03906	0.39737	0.892138	NotSig	-0.0294991	negligible	187.551	176.821	198.282	0.138729	1.1809	1.12137	0.237644	0.556508	Not Sig	nonsignificant	cathepsin B [Source:RGD Symbol;Acc:621509]
Ddah2	chr20	127	122	61.0775	55.3573	-5.72022	0.906345	0.396194	0.892138	NotSig	0.101974	negligible	33.2039	30.8713	35.5366	0.28533	0.727294	1.15112	0.467046	0.716051	Not Sig	nonsignificant	dimethylarginine dimethylaminohydrolase 2 [Source:RGD Symbol;Acc:1302955]
Psma7	chr3	172	161	63.5236	59.3431	-4.18052	0.93419	0.396719	0.892138	NotSig	0.0768163	negligible	42.7138	39.7415	45.6861	0.243975	0.929219	1.14958	0.352776	0.640399	Not Sig	nonsignificant	proteasome 20S subunit alpha 7 [Source:RGD Symbol;Acc:61851]
Rhob	chr6	247	355	73.9894	79.7304	5.74096	1.07759	0.399759	0.893357	NotSig	-0.0520267	negligible	44.3616	51.9533	36.7698	0.267576	-1.93451	0.707746	0.0530501	0.237442	Not Sig	nonsignificant	ras homolog family member B [Source:RGD Symbol;Acc:621309]
Ube2s	chr1	174	173	58.5922	64.2218	5.62952	1.09608	0.405594	0.894004	NotSig	-0.0729721	negligible	44.0038	39.3566	48.651	0.243319	1.10646	1.23616	0.268529	0.58065	Not Sig	nonsignificant	ubiquitin-conjugating enzyme E2S [Source:RGD Symbol;Acc:1564746]
Chmp2a	chr1	115	102	63.8596	58.55	-5.30958	0.916855	0.403011	0.894004	NotSig	0.128491	negligible	30.0319	24.0386	36.0253	0.288518	1.85614	1.49864	0.063434	0.264706	Not Sig	nonsignificant	charged multivesicular body protein 2A [Source:RGD Symbol;Acc:1305050]
Cd81	chr1	1329	1407	85.6431	87.2163	1.57315	1.01837	0.405841	0.894004	NotSig	-0.00151077	negligible	377.715	353.566	401.864	0.12058	1.507	1.1366	0.13181	0.396335	Not Sig	nonsignificant	Cd81 molecule [Source:RGD Symbol;Acc:2315]
Hspa4	chr10	162	213	95.3745	100.211	4.83621	1.05071	0.40248	0.894004	NotSig	-0.0913588	negligible	32.7547	37.3243	28.185	0.274892	-1.46095	0.755137	0.144029	0.415653	Not Sig	nonsignificant	heat shock protein family A (Hsp70) member 4 [Source:RGD Symbol;Acc:628878]
H3f3b	chr10	280	307	67.0367	70.2903	3.25361	1.04853	0.402388	0.894004	NotSig	-0.0364924	negligible	53.8877	53.7425	54.033	0.209508	0.0714441	1.00541	0.943044	0.97405	Not Sig	nonsignificant	H3.3 histone B [Source:RGD Symbol;Acc:621095]
Mmd2	chr12	545	482	87.5854	93.2497	5.6644	1.06467	0.405381	0.894004	NotSig	-0.028568	negligible	111.773	101.396	122.15	0.170657	1.63619	1.20468	0.1018	0.348042	Not Sig	nonsignificant	monocyte to macrophage differentiation-associated 2 [Source:RGD Symbol;Acc:1306506]
Slc27a1	chr16	132	125	76.3659	84.7854	8.41948	1.11025	0.405899	0.894004	NotSig	-0.00896859	negligible	31.5131	30.7237	32.3024	0.289245	0.428218	1.05139	0.668492	0.850948	Not Sig	nonsignificant	solute carrier family 27 member 1 [Source:RGD Symbol;Acc:620927]
Fnta	chr16	113	117	66.9846	74.8181	7.83347	1.11694	0.402292	0.894004	NotSig	-0.101898	negligible	32.5901	28.9402	36.2399	0.268397	1.15071	1.25223	0.249852	0.568516	Not Sig	nonsignificant	farnesyltransferase, CAAX box, alpha [Source:RGD Symbol;Acc:2625]
Tmem14c	chr17	169	155	69.4397	75.6587	6.21899	1.08956	0.404227	0.894004	NotSig	-0.0957438	negligible	26.56	21.3927	31.7272	0.295546	1.9538	1.48308	0.0507252	0.229504	Not Sig	nonsignificant	transmembrane protein 14C [Source:RGD Symbol;Acc:621692]
Insig1	chr4	166	181	84.5377	86.8571	2.31937	1.02744	0.402461	0.894004	NotSig	-0.0665734	negligible	33.2679	33.4808	33.0549	0.273885	-0.214794	0.98728	0.829928	0.92245	Not Sig	nonsignificant	insulin induced gene 1 [Source:RGD Symbol;Acc:708457]
Rusc2	chr5	100	129	99.2869	91.8008	-7.48613	0.924601	0.402228	0.894004	NotSig	0.0772194	negligible	31.7246	35.9229	27.5262	0.278218	-1.21341	0.766257	0.224975	0.539567	Not Sig	nonsignificant	RUN and SH3 domain containing 2 [Source:RGD Symbol;Acc:1592688]
Rab10	chr6	194	230	62.947	69.1446	6.1976	1.09846	0.405123	0.894004	NotSig	-0.0555454	negligible	30.0309	33.2922	26.7695	0.298217	-1.13703	0.804078	0.255524	0.571838	Not Sig	nonsignificant	RAB10, member RAS oncogene family [Source:RGD Symbol;Acc:620879]
Inf2	chr6	96	109	105.575	114.701	9.12596	1.08644	0.402903	0.894004	NotSig	-0.155715	negligible	25.0389	25.8659	24.2118	0.314212	-0.258917	0.936048	0.795699	0.905006	Not Sig	nonsignificant	inverted formin 2 [Source:RGD Symbol;Acc:1308350]
Septin7	chr8	345	346	90.3003	97.9496	7.64931	1.08471	0.401836	0.894004	NotSig	-0.0290947	negligible	81.4206	75.1839	87.6573	0.182005	1.29291	1.1659	0.196043	0.498807	Not Sig	nonsignificant	septin 7 [Source:RGD Symbol;Acc:620469]
Klhdc3	chr9	99	124	65.886	74.8699	8.98384	1.13635	0.407481	0.895894	NotSig	-0.10072	negligible	29.8351	30.5369	29.1333	0.282278	-0.220261	0.954036	0.825668	0.918942	Not Sig	nonsignificant	kelch domain containing 3 [Source:RGD Symbol;Acc:1307105]
Scn1b	chr1	650	693	118.798	122.124	3.32618	1.028	0.40991	0.896175	NotSig	-0.0361994	negligible	173.676	165.135	182.217	0.141333	1.01278	1.10344	0.311164	0.611536	Not Sig	nonsignificant	sodium voltage-gated channel beta subunit 1 [Source:RGD Symbol;Acc:3631]
Rab6a	chr1	336	429	87.8384	93.171	5.33256	1.06071	0.409926	0.896175	NotSig	-0.0631748	negligible	63.366	72.3656	54.3665	0.202747	-2.03502	0.751275	0.0418492	0.212188	Not Sig	nonsignificant	RAB6A, member RAS oncogene family [Source:RGD Symbol;Acc:619737]
Pcp4	chr11	228	227	92.2184	88.4542	-3.76418	0.959182	0.409752	0.896175	NotSig	0.0260535	negligible	56.9306	51.3907	62.4705	0.218083	1.17391	1.2156	0.240431	0.560739	Not Sig	nonsignificant	Purkinje cell protein 4 [Source:RGD Symbol;Acc:3271]
Vmp1	chr10	164	202	80.8442	77.3156	-3.52858	0.956353	0.41015	0.896353	NotSig	0.0893804	negligible	42.4999	43.7494	41.2504	0.241712	-0.547493	0.94288	0.58404	0.809981	Not Sig	nonsignificant	vacuole membrane protein 1 [Source:RGD Symbol;Acc:70367]
Lix1	chr1	284	246	77.9695	81.4762	3.50666	1.04497	0.411318	0.896771	NotSig	-0.0926379	negligible	55.5249	45.9591	65.0908	0.217263	2.2259	1.41628	0.0260208	0.163597	Not Sig	nonsignificant	limb and CNS expressed 1 [Source:RGD Symbol;Acc:1309454]
Gpx1	chr8	118	137	62.7307	67.5159	4.78525	1.07628	0.411742	0.896771	NotSig	-0.12238	negligible	32.7829	33.0641	32.5016	0.278341	-0.28169	0.982988	0.778181	0.896659	Not Sig	nonsignificant	glutathione peroxidase 1 [Source:RGD Symbol;Acc:2729]
Vamp2	chr10	664	719	81.0804	84.4444	3.36403	1.04149	0.412566	0.896838	NotSig	-0.051396	negligible	99.4155	104.533	94.2978	0.179304	-0.859511	0.902084	0.390059	0.664736	Not Sig	nonsignificant	vesicle-associated membrane protein 2 [Source:RGD Symbol;Acc:3949]
Ubl3	chr12	251	271	83.7635	90.0073	6.24381	1.07454	0.412327	0.896838	NotSig	-0.0874989	negligible	57.1674	56.622	57.7128	0.208277	0.123103	1.01926	0.902026	0.953092	Not Sig	nonsignificant	ubiquitin-like 3 [Source:RGD Symbol;Acc:1305431]
Map4k4	chr9	187	175	86.3159	82.3431	-3.97276	0.953974	0.412694	0.896838	NotSig	0.105475	negligible	34.324	30.6924	37.9556	0.264418	1.09568	1.23665	0.273221	0.585055	Not Sig	nonsignificant	mitogen-activated protein kinase kinase kinase kinase 4 [Source:RGD Symbol;Acc:1305322]
B4galnt1	chr7	86	88	96.9419	89.5725	-7.36942	0.923981	0.412903	0.896838	NotSig	0.129011	negligible	25.4075	24.1741	26.6409	0.297242	0.573414	1.10204	0.566364	0.796443	Not Sig	nonsignificant	beta-1,4-N-acetyl-galactosaminyl transferase 1 [Source:RGD Symbol;Acc:620490]
Gm5471	chr5	195	168	63.686	67.9849	4.29893	1.0675	0.413572	0.897267	NotSig	-0.142521	negligible	52.0692	44.2117	59.9268	0.218818	1.98652	1.35545	0.0469755	0.222535	Not Sig	nonsignificant	predicted pseudogene 5471 [Source:RGD Symbol;Acc:1560994]
Rpl10a	chr20	504	440	61.829	63.8169	1.98788	1.03215	0.41626	0.897981	NotSig	-0.020578	negligible	61.21	50.7118	71.7081	0.221703	2.34804	1.41403	0.0188726	0.143547	Not Sig	nonsignificant	ribosomal protein L10A [Source:RGD Symbol;Acc:620497]
Vdac2	chr15	236	258	69.7301	74.5526	4.82254	1.06916	0.417089	0.898346	NotSig	-0.0394942	negligible	63.4626	61.8759	65.0494	0.205501	0.48246	1.05129	0.629479	0.83162	Not Sig	nonsignificant	voltage-dependent anion channel 2 [Source:RGD Symbol;Acc:621576]
Cltc	chr10	318	454	99.2572	105.248	5.99101	1.06036	0.417585	0.898662	NotSig	-0.0594632	negligible	85.0083	96.3857	73.631	0.200083	-1.91796	0.763921	0.055116	0.243417	Not Sig	nonsignificant	clathrin heavy chain [Source:RGD Symbol;Acc:2364]
Dact3	chr1	247	377	64.65	61.0347	-3.61538	0.944078	0.418529	0.899155	NotSig	0.0435283	negligible	50.1443	57.3712	42.9173	0.227473	-1.87533	0.748064	0.060747	0.258803	Not Sig	nonsignificant	dishevelled-binding antagonist of beta-catenin 3 [Source:RGD Symbol;Acc:1563892]
Tspan2	chr2	337	356	88.5846	94.1657	5.58108	1.063	0.419373	0.899804	NotSig	-0.0470035	negligible	38.4323	43.1599	33.7047	0.277825	-1.27088	0.780926	0.203772	0.509429	Not Sig	nonsignificant	tetraspanin 2 [Source:RGD Symbol;Acc:620982]
Stub1	chr10	161	165	68.592	72.3171	3.72507	1.05431	0.420053	0.900342	NotSig	-0.0325333	negligible	43.3475	39.8185	46.8765	0.229175	1.02049	1.17725	0.307497	0.610959	Not Sig	nonsignificant	STIP1 homology and U-box containing protein 1 [Source:RGD Symbol;Acc:1306167]
Cyp46a1	chr6	275	279	111.47	109.624	-1.84622	0.983438	0.420478	0.900956	NotSig	0.0535228	negligible	67.84	64.5257	71.1544	0.19443	0.7112	1.10273	0.47696	0.726919	Not Sig	nonsignificant	cytochrome P450, family 46, subfamily a, polypeptide 1 [Source:RGD Symbol;Acc:1306605]
Gcsh	chr19	134	117	80.1138	88.3104	8.19663	1.10231	0.424222	0.90358	NotSig	-0.158269	negligible	33.8076	29.1518	38.4634	0.264209	1.61321	1.31942	0.106699	0.359024	Not Sig	nonsignificant	glycine cleavage system protein H [Source:RGD Symbol;Acc:619946]
Josd2	chr1	118	120	80.796	75.7278	-5.06822	0.937271	0.424607	0.903775	NotSig	0.176534	negligible	27.859	25.1183	30.5998	0.278476	0.982336	1.21823	0.325934	0.622555	Not Sig	nonsignificant	Josephin domain containing 2 [Source:RGD Symbol;Acc:1307305]
Cox17	chr11	138	144	60.2088	65.6389	5.43018	1.09019	0.426772	0.904222	NotSig	-0.119648	negligible	34.6028	33.1673	36.0384	0.262511	0.517367	1.08657	0.6049	0.817435	Not Sig	nonsignificant
Rps18	chr20	1060	835	40.7746	40.2754	-0.499194	0.987757	0.430658	0.905247	NotSig	0.0166206	negligible	133.763	98.7922	168.734	0.215143	3.64549	1.70797	0.000266884	0.0201982	FDR<0.05	nonsignificant
Arpc4	chr4	306	358	91.6215	96.5926	4.97113	1.05426	0.429506	0.905247	NotSig	-0.106425	negligible	81.3697	84.894	77.8453	0.181936	-0.598374	0.916971	0.549591	0.784793	Not Sig	nonsignificant	actin related protein 2/3 complex, subunit 4 [Source:RGD Symbol;Acc:1310096]
Resp18	chr9	217	211	75.1209	79.4849	4.36397	1.05809	0.428706	0.905247	NotSig	-0.0946389	negligible	55.0253	50.8169	59.2338	0.221131	1.13144	1.16563	0.257868	0.573997	Not Sig	nonsignificant	regulated endocrine-specific protein 18 [Source:RGD Symbol;Acc:3555]
Ppp1cc	chr12	177	152	87.6955	81.8824	-5.81308	0.933713	0.430883	0.905476	NotSig	0.12234	negligible	40.8163	36.0304	45.6022	0.236494	1.4777	1.26566	0.139487	0.411711	Not Sig	nonsignificant	protein phosphatase 1 catalytic subunit gamma [Source:RGD Symbol;Acc:3377]
Bcas1	chr3	1034	833	68.8551	71.5046	2.64949	1.03848	0.431139	0.905476	NotSig	-0.0416534	negligible	219.261	189.492	249.031	0.139747	2.94522	1.3142	0.00322722	0.0639681	Not Sig	nonsignificant	brain enriched myelin associated protein 1 [Source:RGD Symbol;Acc:628644]
Cox6b1	chr1	801	757	75.6436	78.4959	2.85226	1.03771	0.43491	0.905627	NotSig	-0.0535404	negligible	92.2176	84.0014	100.434	0.211984	1.28086	1.19562	0.200241	0.50437	Not Sig	nonsignificant	cytochrome c oxidase subunit 6B1 [Source:RGD Symbol;Acc:1584097]
Arpc1a	chr12	236	303	86.4135	82.4521	-3.96141	0.954157	0.433803	0.905627	NotSig	0.126333	negligible	72.1573	73.2321	71.0824	0.218119	-0.24266	0.970645	0.808269	0.912571	Not Sig	nonsignificant	actin related protein 2/3 complex, subunit 1A [Source:RGD Symbol;Acc:620834]
Slc30a9	chr14	133	117	97.7481	102.486	4.73769	1.04847	0.432286	0.905627	NotSig	-0.0947153	negligible	27.3231	23.8657	30.7806	0.28634	1.37864	1.28974	0.168006	0.454846	Not Sig	nonsignificant	solute carrier family 30 member 9 [Source:RGD Symbol;Acc:1593180]
Vps41	chr17	132	133	94.3076	89.7478	-4.55977	0.95165	0.436398	0.905627	NotSig	0.0406366	negligible	35.5613	33.5018	37.6209	0.260356	0.702405	1.12295	0.482427	0.729122	Not Sig	nonsignificant	VPS41 subunit of HOPS complex [Source:RGD Symbol;Acc:1560511]
Itfg1	chr19	182	235	98.9657	96.0261	-2.93967	0.970296	0.438788	0.905627	NotSig	0.0610664	negligible	44.3559	50.1472	38.5646	0.23332	-1.56854	0.769028	0.116754	0.37353	Not Sig	nonsignificant	integrin alpha FG-GAP repeat containing 1 [Source:RGD Symbol;Acc:619898]
Cnn3	chr2	250	205	84.651	90.0208	5.36982	1.06343	0.432013	0.905627	NotSig	-0.0309271	negligible	54.194	45.4594	62.9287	0.216	2.12529	1.38428	0.0335627	0.190074	Not Sig	nonsignificant	calponin 3 [Source:RGD Symbol;Acc:71044]
Ehmt2	chr20	151	157	95.5532	92.5046	-3.04867	0.968095	0.437206	0.905627	NotSig	0.153013	negligible	43.3993	43.3391	43.4595	0.231394	0.00833721	1.00278	0.993348	0.996941	Not Sig	nonsignificant	euchromatic histone lysine methyltransferase 2 [Source:RGD Symbol;Acc:1302972]
Ddt	chr20	247	247	60.2426	64.2003	3.95769	1.0657	0.432362	0.905627	NotSig	-0.0874642	negligible	60.1686	55.2133	65.1239	0.224548	1.00967	1.1795	0.312654	0.611536	Not Sig	nonsignificant	D-dopachrome tautomerase [Source:RGD Symbol;Acc:61923]
Gsn	chr3	298	258	82.8045	86.7864	3.98183	1.04809	0.431646	0.905627	NotSig	-0.0781541	negligible	75.9812	64.2902	87.6721	0.208994	2.19348	1.36369	0.0282727	0.171803	Not Sig	nonsignificant	gelsolin [Source:RGD Symbol;Acc:1303089]
Tmbim6	chr7	669	697	78.0834	81.7509	3.66746	1.04697	0.434681	0.905627	NotSig	-0.0386932	negligible	169.037	159.521	178.552	0.141622	1.13325	1.1193	0.257109	0.573842	Not Sig	nonsignificant	transmembrane BAX inhibitor motif containing 6 [Source:RGD Symbol;Acc:3842]
B3gat1	chr8	275	277	96.3876	101.046	4.65873	1.04833	0.435355	0.905627	NotSig	-0.0745715	negligible	44.6708	45.5045	43.837	0.23123	-0.361894	0.963357	0.717431	0.872517	Not Sig	nonsignificant	beta-1,3-glucuronyltransferase 1 [Source:RGD Symbol;Acc:70880]
Pkm	chr8	646	920	93.2137	96.1048	2.89103	1.03102	0.434175	0.905627	NotSig	-0.0104526	negligible	190.349	214.976	165.722	0.164106	-2.25275	0.770884	0.0242748	0.157881	Not Sig	nonsignificant	pyruvate kinase M1/2 [Source:RGD Symbol;Acc:3337]
Morf4l2	chrX	131	199	102.624	97.7042	-4.91942	0.952063	0.438453	0.905627	NotSig	0.141895	negligible	30.5851	33.899	27.2712	0.270621	-1.29421	0.804485	0.195594	0.498807	Not Sig	nonsignificant	mortality factor 4 like 2 [Source:RGD Symbol;Acc:1359471]
Pdxp	chr7	125	120	89.3413	83.6175	-5.72382	0.935933	0.44019	0.90653	NotSig	0.0949408	negligible	27.4059	26.5689	28.2429	0.283297	0.443637	1.06301	0.657305	0.846472	Not Sig	nonsignificant	pyridoxal phosphatase [Source:RGD Symbol;Acc:1586212]
Nucb1	chr1	213	290	86.6455	91.3125	4.667	1.05386	0.443035	0.90664	NotSig	0.0138829	negligible	57.5119	63.8395	51.1844	0.228371	-1.33107	0.801767	0.183165	0.479513	Not Sig	nonsignificant	nucleobindin 1 [Source:RGD Symbol;Acc:620030]
Chd4	chr4	142	191	76.3438	69.2758	-7.06802	0.907419	0.443	0.90664	NotSig	0.0891405	negligible	41.7901	46.2052	37.375	0.246278	-1.13842	0.808892	0.254946	0.571838	Not Sig	nonsignificant	chromodomain helicase DNA binding protein 4 [Source:RGD Symbol;Acc:620064]
Map7d1	chr5	119	151	81.8288	76.3142	-5.51457	0.932608	0.44082	0.90664	NotSig	0.00341099	negligible	35.7122	37.9176	33.5069	0.273984	-0.36154	0.883677	0.717696	0.872517	Not Sig	nonsignificant	MAP7 domain containing 1 [Source:RGD Symbol;Acc:1597986]
Ndufa7	chr7	202	206	63.8225	67.2935	3.47103	1.05439	0.441778	0.90664	NotSig	-0.0444227	negligible	49.6566	45.7226	53.5906	0.229978	1.00909	1.17208	0.31293	0.611536	Not Sig	nonsignificant
Gjb6	chr15	135	138	69.6235	73.2202	3.59669	1.05166	0.446946	0.907427	NotSig	-0.00397737	negligible	28.9782	27.3032	30.6532	0.280267	0.633549	1.1227	0.526375	0.769852	Not Sig	nonsignificant	gap junction protein, beta 6 [Source:RGD Symbol;Acc:621830]
Ptk2b	chr15	276	348	83.8046	87.7469	3.94228	1.04704	0.446933	0.907427	NotSig	-0.0396965	negligible	76.14	81.0272	71.2528	0.216008	-0.758386	0.879369	0.44822	0.698648	Not Sig	nonsignificant	protein tyrosine kinase 2 beta [Source:RGD Symbol;Acc:628758]
Bap1	chr16	248	236	84.6553	90.2947	5.63942	1.06662	0.445648	0.907427	NotSig	-0.0659675	negligible	52.1059	49.2394	54.9725	0.218492	0.762391	1.11643	0.445827	0.698648	Not Sig	nonsignificant	Brca1 associated protein 1 [Source:RGD Symbol;Acc:1311938]
Slc20a1	chr3	112	119	93.8407	100.724	6.88353	1.07335	0.445225	0.907427	NotSig	-0.111225	negligible	28.209	26.5723	29.8457	0.292617	0.478211	1.12319	0.6325	0.832835	Not Sig	nonsignificant	solute carrier family 20 member 1 [Source:RGD Symbol;Acc:621079]
Peds1	chr3	167	200	85.5419	82.1892	-3.35272	0.960806	0.444682	0.907427	NotSig	0.0803766	negligible	42.3958	41.5777	43.2139	0.240021	0.0341597	1.03935	0.97275	0.987833	Not Sig	nonsignificant	plasmanylethanolamine desaturase 1 [Source:RGD Symbol;Acc:1309093]
Parp6	chr8	111	151	82.5414	86.9517	4.41037	1.05343	0.444897	0.907427	NotSig	-0.0992013	negligible	36.3574	38.8042	33.9106	0.258826	-0.696463	0.87389	0.486139	0.731185	Not Sig	nonsignificant	poly (ADP-ribose) polymerase family, member 6 [Source:RGD Symbol;Acc:1310937]
Pkig	chr3	191	169	71.4266	74.8216	3.39495	1.04753	0.448395	0.907466	NotSig	-0.0758467	negligible	47.5443	42.9945	52.0941	0.254044	1.32161	1.21164	0.186298	0.484876	Not Sig	nonsignificant	cAMP-dependent protein kinase inhibitor gamma [Source:RGD Symbol;Acc:628775]
Pabpc1	chr7	217	281	40.9858	44.0877	3.1019	1.07568	0.450302	0.908043	NotSig	-0.161753	negligible	70.5209	76.0812	64.9607	0.192915	-1.194	0.853834	0.232476	0.54982	Not Sig	nonsignificant	poly(A) binding protein, cytoplasmic 1 [Source:RGD Symbol;Acc:619838]
Olfm1	chr3	2096	2344	90.016	91.7941	1.77811	1.01975	0.451237	0.90916	NotSig	-0.0146254	negligible	526.021	523.13	528.912	0.108284	0.155103	1.01105	0.87674	0.942538	Not Sig	nonsignificant	olfactomedin 1 [Source:RGD Symbol;Acc:620320]
Hnrnpdl	chr14	169	182	119.428	129.495	10.0668	1.08429	0.452863	0.911662	NotSig	-0.080251	negligible	32.4527	35.3923	29.5131	0.261946	-1.01717	0.833886	0.309072	0.611536	Not Sig	nonsignificant	heterogeneous nuclear ribonucleoprotein D-like [Source:RGD Symbol;Acc:1309950]
Copb2	chr8	90	101	83.8553	78.0532	-5.80205	0.930809	0.454067	0.912841	NotSig	0.108611	negligible	26.492	25.9605	27.0236	0.289733	0.331966	1.04095	0.739915	0.882912	Not Sig	nonsignificant	COPI coat complex subunit beta 2 [Source:RGD Symbol;Acc:628746]
Psmd3	chr10	87	124	77.7588	82.4342	4.67541	1.06013	0.455204	0.913197	NotSig	-0.103595	negligible	27.545	30.2163	24.8737	0.285753	-1.08693	0.823189	0.277069	0.588126	Not Sig	nonsignificant	proteasome 26S subunit, non-ATPase 3 [Source:RGD Symbol;Acc:1311470]
Fam162a	chr11	102	114	56.2764	62.5826	6.30622	1.11206	0.457725	0.913197	NotSig	-0.145473	negligible	27.9404	26.0531	29.8277	0.282832	0.598537	1.14488	0.549482	0.784793	Not Sig	nonsignificant	family with sequence similarity 162, member A [Source:RGD Symbol;Acc:1590883]
LOC100365839	chr11	189	178	44.8737	47.3322	2.45845	1.05479	0.457822	0.913197	NotSig	-0.107307	negligible	65.8527	60.5482	71.1572	0.249037	0.824201	1.17521	0.409826	0.682359	Not Sig	nonsignificant	40S ribosomal protein S3a-like [Source:RGD Symbol;Acc:2318248]
Csf1r	chr18	136	127	79.4406	75.344	-4.09654	0.948433	0.45746	0.913197	NotSig	0.138739	negligible	33.1871	28.9094	37.4647	0.270577	1.14749	1.29593	0.25118	0.568516	Not Sig	nonsignificant	colony stimulating factor 1 receptor [Source:RGD Symbol;Acc:2425]
Ddx39b	chr20	144	160	125.134	115.245	-9.88958	0.920968	0.45714	0.913197	NotSig	0.0666616	negligible	32.8769	33.1294	32.6243	0.270796	0.0792521	0.984752	0.936832	0.973066	Not Sig	nonsignificant	DExD-box helicase 39B [Source:RGD Symbol;Acc:70923]
Csnk2b	chr20	142	135	65.0381	61.8148	-3.22329	0.95044	0.458038	0.913197	NotSig	0.0600937	negligible	37.9462	33.1093	42.7831	0.258271	1.28545	1.29218	0.198634	0.501859	Not Sig	nonsignificant	casein kinase 2 beta [Source:RGD Symbol;Acc:619978]
Tmeff1	chr5	99	141	84.7997	90.612	5.8123	1.06854	0.455067	0.913197	NotSig	-0.109702	negligible	26.8871	27.6656	26.1087	0.300774	-0.507565	0.943725	0.611758	0.820772	Not Sig	nonsignificant	transmembrane protein with EGF-like and two follistatin-like domains 1 [Source:RGD Symbol;Acc:62005]
Ntsr2	chr6	435	374	81.8513	84.6851	2.83378	1.03462	0.456311	0.913197	NotSig	-0.0252089	negligible	107.804	89.2287	126.379	0.180107	2.81651	1.41635	0.00485488	0.0776147	Not Sig	nonsignificant	neurotensin receptor 2 [Source:RGD Symbol;Acc:70962]
Ldha	chr1	269	469	92.0376	95.8326	3.79501	1.04123	0.458453	0.913452	NotSig	-0.0524953	negligible	87.6374	104.476	70.799	0.178934	-3.00255	0.677659	0.00267731	0.0578926	Not Sig	nonsignificant	lactate dehydrogenase A [Source:RGD Symbol;Acc:2996]
Laptm4b	chr7	102	105	80.8842	86.3751	5.49093	1.06789	0.459044	0.914055	NotSig	-0.0831045	negligible	24.936	24.0484	25.8236	0.307963	0.211156	1.07382	0.832765	0.924986	Not Sig	nonsignificant	lysosomal protein transmembrane 4 beta [Source:RGD Symbol;Acc:1311853]
Tmem160	chr1	228	214	59.2733	62.2408	2.96757	1.05007	0.464096	0.916017	NotSig	-0.128123	negligible	57.0606	50.7487	63.3724	0.216808	1.60134	1.24875	0.109302	0.363976	Not Sig	nonsignificant	transmembrane protein 160 [Source:RGD Symbol;Acc:1564549]
LOC100910788	chr12	478	446	60.2165	57.8609	-2.35559	0.960881	0.463982	0.916017	NotSig	0.048308	negligible	108.485	96.4641	120.507	0.18688	1.66215	1.24924	0.0964828	0.335334	Not Sig	nonsignificant
Ociad1	chr14	469	471	94.3067	98.9718	4.6651	1.04947	0.463073	0.916017	NotSig	-0.0518463	negligible	113.982	103.276	124.687	0.163417	1.57608	1.20731	0.115007	0.372542	Not Sig	nonsignificant	OCIA domain containing 1 [Source:RGD Symbol;Acc:1359549]
Lman2	chr17	106	120	73.5983	68.1223	-5.47607	0.925595	0.464227	0.916017	NotSig	0.072091	negligible	26.4473	27.4527	25.4418	0.293649	-0.203343	0.926749	0.838867	0.928048	Not Sig	nonsignificant	lectin, mannose-binding 2 [Source:RGD Symbol;Acc:1308965]
Scamp3	chr2	90	124	82.0279	83.8309	1.80299	1.02198	0.464585	0.916017	NotSig	0.00835708	negligible	26.7503	28.1013	25.3994	0.286704	-0.676842	0.903851	0.498506	0.743345	Not Sig	nonsignificant	secretory carrier membrane protein 3 [Source:RGD Symbol;Acc:68351]
Sumo1	chr9	128	106	59.9373	64.7554	4.81808	1.08039	0.465123	0.916017	NotSig	-0.0390763	negligible	29.7954	25.6433	33.9475	0.271467	1.57438	1.32384	0.115399	0.373086	Not Sig	nonsignificant	small ubiquitin-like modifier 1 [Source:RGD Symbol;Acc:1306919]
Hnrnpd	chr14	111	157	60.9416	69.3275	8.38596	1.13761	0.466611	0.916085	NotSig	-0.0517678	negligible	31.3522	35.986	26.7183	0.285549	-1.47384	0.742463	0.140524	0.412173	Not Sig	nonsignificant	heterogeneous nuclear ribonucleoprotein D [Source:RGD Symbol;Acc:620365]
Smpd1	chr1	143	177	76.8989	82.8093	5.9104	1.07686	0.466992	0.916085	NotSig	-0.0493827	negligible	39.022	39.5327	38.5113	0.260032	-0.31364	0.974162	0.753795	0.890119	Not Sig	nonsignificant	sphingomyelin phosphodiesterase 1 [Source:RGD Symbol;Acc:1549719]
Rph3a	chr12	153	203	102.76	100.137	-2.62252	0.974479	0.467426	0.916182	NotSig	0.144919	negligible	26.5397	33.1301	19.9493	0.313948	-2.29274	0.602152	0.0218632	0.155352	Not Sig	nonsignificant	rabphilin 3A [Source:RGD Symbol;Acc:620073]
Txndc15	chr17	173	147	71.2296	76.2302	5.00065	1.0702	0.467292	0.916182	NotSig	-0.0997894	negligible	41.2712	34.2108	48.3316	0.26296	1.78766	1.41276	0.0738311	0.286616	Not Sig	nonsignificant	thioredoxin domain containing 15 [Source:RGD Symbol;Acc:1304696]
Mesd	chr1	102	138	83.5453	77.7361	-5.80922	0.930466	0.468397	0.9166	NotSig	0.123305	negligible	26.7507	29.464	24.0375	0.290135	-1.12297	0.815828	0.26145	0.575051	Not Sig	nonsignificant	mesoderm development LRP chaperone [Source:RGD Symbol;Acc:1310344]
Erh	chr6	160	166	77.9675	72.5974	-5.37015	0.931123	0.470083	0.916707	NotSig	0.0772636	negligible	43.7575	40.2364	47.2786	0.238396	0.887452	1.17502	0.374836	0.653783	Not Sig	nonsignificant	ERH, mRNA splicing and mitosis factor [Source:RGD Symbol;Acc:1595409]
Hepacam	chr8	218	222	89.2613	85.423	-3.83828	0.957	0.47022	0.916707	NotSig	0.135202	negligible	30.3641	34.8667	25.8615	0.286078	-1.43416	0.741725	0.151526	0.426888	Not Sig	nonsignificant	hepatic and glial cell adhesion molecule [Source:RGD Symbol;Acc:1306811]
Slc25a18	chr4	140	104	87.1944	81.5274	-5.66703	0.935007	0.471009	0.91735	NotSig	0.181446	negligible	30.0181	22.6972	37.339	0.291879	2.31035	1.64509	0.0208688	0.151731	Not Sig	nonsignificant	solute carrier family 25 member 18 [Source:RGD Symbol;Acc:1590470]
Npm1	chr10	176	199	51.5754	55.4861	3.9107	1.07582	0.473416	0.918934	NotSig	-0.0978715	negligible	43.307	42.2727	44.3413	0.247296	0.31253	1.04893	0.754638	0.890483	Not Sig	nonsignificant	nucleophosmin 1 [Source:RGD Symbol;Acc:3192]
Tusc3	chr16	251	307	90.7455	94.3634	3.61792	1.03987	0.47481	0.920217	NotSig	-0.0595831	negligible	73.8585	73.219	74.498	0.19721	0.051716	1.01747	0.958755	0.981751	Not Sig	nonsignificant	tumor suppressor candidate 3 [Source:RGD Symbol;Acc:1303318]
Trnp1	chr5	132	127	80.7083	86.3502	5.64187	1.0699	0.475012	0.920252	NotSig	-0.0783012	negligible	32.0229	28.6943	35.3515	0.276649	1.06695	1.23201	0.285995	0.595228	Not Sig	nonsignificant	TMF1-regulated nuclear protein 1 [Source:RGD Symbol;Acc:1582917]
S1pr1	chr2	243	258	65.1719	66.3955	1.22355	1.01877	0.476093	0.921034	NotSig	-0.105533	negligible	35.9983	39.3446	32.6521	0.258965	-1.00685	0.829902	0.314008	0.612924	Not Sig	nonsignificant	sphingosine-1-phosphate receptor 1 [Source:RGD Symbol;Acc:61958]
Gaa	chr10	163	180	95.1317	89.0912	-6.04049	0.936504	0.477109	0.921082	NotSig	0.0484055	negligible	46.5447	44.475	48.6144	0.243477	0.465337	1.09307	0.64169	0.84127	Not Sig	nonsignificant	alpha glucosidase [Source:RGD Symbol;Acc:735227]
Clta	chr5	204	209	65.6482	69.0692	3.42092	1.05211	0.47902	0.921082	NotSig	-0.0711476	negligible	56.4876	53.0423	59.9328	0.218996	0.934552	1.12991	0.350019	0.639443	Not Sig	nonsignificant	clathrin, light chain A [Source:RGD Symbol;Acc:70919]
Rtn1	chr6	1363	1704	97.3418	99.7794	2.43767	1.02504	0.477551	0.921082	NotSig	-0.0168373	negligible	381.919	400.997	362.841	0.129905	-1.10332	0.904846	0.269889	0.58139	Not Sig	nonsignificant	reticulon 1 [Source:RGD Symbol;Acc:620986]
Atg9a	chr9	165	191	94.3358	99.5342	5.19837	1.0551	0.478643	0.921082	NotSig	-0.0930234	negligible	41.3146	40.0883	42.5409	0.243479	0.293598	1.06118	0.769065	0.896076	Not Sig	nonsignificant	autophagy related 9A [Source:RGD Symbol;Acc:1310450]
Eif4b	chr7	160	189	74.9849	80.2518	5.26687	1.07024	0.480199	0.921405	NotSig	-0.0974048	negligible	31.9717	35.8207	28.1227	0.264207	-1.19495	0.785097	0.232108	0.54973	Not Sig	nonsignificant
Selenop	chr2	984	999	86.6242	88.0601	1.43586	1.01658	0.482888	0.922019	NotSig	-0.0128735	negligible	218.035	210.828	225.241	0.146461	0.630308	1.06836	0.528493	0.769852	Not Sig	nonsignificant	selenoprotein P [Source:RGD Symbol;Acc:3660]
LOC120093072	chr5	36	49	49.7524	44.6837	-5.06865	0.898122	0.482144	0.922019	NotSig	0.147465	negligible	389.498	338.315	440.681	0.166129	2.32253	1.30257	0.0202043	0.149512	Not Sig	nonsignificant
Ntm	chr8	195	195	81.3012	84.3958	3.09468	1.03806	0.482044	0.922019	NotSig	-0.0692596	negligible	24.9228	26.3878	23.4578	0.319661	-0.691204	0.888963	0.489437	0.735406	Not Sig	nonsignificant	neurotrimin [Source:RGD Symbol;Acc:620958]
Idh3a	chr8	142	212	80.4099	86.8291	6.41921	1.07983	0.481664	0.922019	NotSig	-0.0797427	negligible	34.462	41.0116	27.9124	0.257926	-2.14658	0.680597	0.0318269	0.185936	Not Sig	nonsignificant	isocitrate dehydrogenase (NAD(+)) 3 catalytic subunit alpha [Source:RGD Symbol;Acc:70889]
Atp1b2	chr10	644	679	80.1938	82.4769	2.28312	1.02847	0.484472	0.922803	NotSig	-0.0368788	negligible	99.4233	107.448	91.3985	0.206354	-1.14553	0.85063	0.251991	0.568516	Not Sig	nonsignificant	ATPase Na+/K+ transporting subunit beta 2 [Source:RGD Symbol;Acc:2171]
Fkbp3	chr6	86	152	79.9255	85.9102	5.98478	1.07488	0.486573	0.923557	NotSig	-0.056989	negligible	30.0054	34.9518	25.059	0.285351	-1.59056	0.71696	0.111709	0.367722	Not Sig	nonsignificant	FKBP prolyl isomerase 3 [Source:RGD Symbol;Acc:1304992]
Mboat7	chr1	149	148	96.9358	99.5373	2.60159	1.02684	0.486036	0.923557	NotSig	-0.110347	negligible	30.1549	26.998	33.3118	0.284384	1.02604	1.23386	0.304872	0.61011	Not Sig	nonsignificant	membrane bound O-acyltransferase domain containing 7 [Source:RGD Symbol;Acc:1306945]
Emc7	chr3	193	217	76.816	82.6058	5.78984	1.07537	0.487242	0.924	NotSig	-0.0781225	negligible	55.1794	50.4776	59.8812	0.220416	1.09744	1.18629	0.272449	0.585055	Not Sig	nonsignificant	ER membrane protein complex subunit 7 [Source:RGD Symbol;Acc:1305045]
Dbndd2	chr3	231	185	61.2796	64.9831	3.70349	1.06044	0.487264	0.924	NotSig	-0.0264923	negligible	55.2812	44.6904	65.8721	0.230235	2.35143	1.47396	0.0187012	0.143547	Not Sig	nonsignificant
Ubxn1	chr1	140	129	76.6673	72.7719	-3.89549	0.94919	0.48903	0.924083	NotSig	0.0793774	negligible	34.4597	29.9522	38.9673	0.276823	1.33832	1.30098	0.180791	0.477048	Not Sig	nonsignificant	UBX domain protein 1 [Source:RGD Symbol;Acc:1309471]
Rtn2	chr1	112	136	58.1802	63.1256	4.94543	1.085	0.490627	0.92416	NotSig	-0.169858	negligible	30.9592	32.2474	29.671	0.269227	-0.416408	0.920106	0.677112	0.855065	Not Sig	nonsignificant	reticulon 2 [Source:RGD Symbol;Acc:1303245]
LOC103690996	chr12	148	152	47.6131	48.7931	1.18003	1.02478	0.49082	0.92416	NotSig	-0.0256946	negligible	54.9507	51.0499	58.8515	0.237084	0.982839	1.15282	0.325686	0.622555	Not Sig	nonsignificant	uncharacterized LOC103690996 [Source:RGD Symbol;Acc:9247033]
Msmo1	chr16	267	268	77.196	80.9581	3.76207	1.04873	0.489856	0.92416	NotSig	-0.0565448	negligible	68.2093	63.8153	72.6034	0.199225	1.02302	1.13771	0.306298	0.610691	Not Sig	nonsignificant	methylsterol monooxygenase 1 [Source:RGD Symbol;Acc:620281]
Slc25a4	chr16	786	872	67.6542	69.5334	1.87921	1.02778	0.490157	0.92416	NotSig	-0.00551672	negligible	217.529	213.91	221.148	0.142104	0.4185	1.03384	0.675582	0.855065	Not Sig	nonsignificant	solute carrier family 25 member 4 [Source:RGD Symbol;Acc:620352]
Rnf14	chr18	202	255	98.2771	107.922	9.64446	1.09814	0.49062	0.92416	NotSig	-0.00323404	negligible	48.4335	52.5981	44.2689	0.221633	-1.26719	0.841646	0.205086	0.511476	Not Sig	nonsignificant	ring finger protein 14 [Source:RGD Symbol;Acc:1589576]
Abhd17a	chr7	277	316	64.4766	62.4447	-2.03187	0.968487	0.491008	0.92416	NotSig	0.0545282	negligible	73.7448	72.3896	75.0999	0.191521	0.392963	1.03744	0.694347	0.864041	Not Sig	nonsignificant	abhydrolase domain containing 17A, depalmitoylase [Source:RGD Symbol;Acc:1359682]
Rpl4	chr8	894	847	63.0515	65.0769	2.02541	1.03212	0.491419	0.924201	NotSig	-0.04683	negligible	232.42	208.171	256.67	0.170864	1.78599	1.23298	0.0741004	0.286616	Not Sig	nonsignificant	ribosomal protein L4 [Source:RGD Symbol;Acc:619824]
Slc35b1	chr10	128	126	83.6477	78.3454	-5.30231	0.936611	0.492805	0.925052	NotSig	0.0865682	negligible	30.5609	26.4853	34.6364	0.267992	1.25424	1.30776	0.209754	0.515864	Not Sig	nonsignificant	solute carrier family 35, member B1 [Source:RGD Symbol;Acc:727783]
Snca	chr4	184	259	84.3423	88.187	3.84465	1.04558	0.49338	0.925052	NotSig	-0.0821102	negligible	57.4675	60.9752	53.9598	0.217941	-0.775654	0.884947	0.437953	0.696459	Not Sig	nonsignificant	synuclein alpha [Source:RGD Symbol;Acc:3729]
Capns1	chr1	247	227	75.5628	78.1932	2.63048	1.03481	0.501189	0.925793	NotSig	-0.0628315	negligible	64.5864	56.5377	72.6351	0.196363	1.79511	1.28472	0.072636	0.286616	Not Sig	nonsignificant	calpain, small subunit 1 [Source:RGD Symbol;Acc:2270]
Pc	chr1	95	98	90.6074	98.9608	8.35341	1.09219	0.500259	0.925793	NotSig	-0.00530432	negligible	25.4243	21.865	28.9836	0.308163	1.12861	1.32557	0.259063	0.574031	Not Sig	nonsignificant	pyruvate carboxylase [Source:RGD Symbol;Acc:3262]
Got1	chr1	173	246	101.85	108.018	6.16797	1.06056	0.503742	0.925793	NotSig	-0.0635392	negligible	48.0968	52.9907	43.2028	0.233062	-1.31521	0.815291	0.188441	0.488714	Not Sig	nonsignificant	glutamic-oxaloacetic transaminase 1 [Source:RGD Symbol;Acc:2721]
Tsc2	chr10	167	136	94.8038	88.9276	-5.87622	0.938017	0.502608	0.925793	NotSig	0.0321814	negligible	41.7367	32.7748	50.6985	0.244768	2.6388	1.54688	0.00831991	0.103119	Not Sig	nonsignificant	TSC complex subunit 2 [Source:RGD Symbol;Acc:3908]
Chd3	chr10	181	257	87.8712	90.7548	2.88361	1.03282	0.496767	0.925793	NotSig	-0.0256712	negligible	48.8977	56.9223	40.8732	0.226378	-2.06922	0.718052	0.0385257	0.203694	Not Sig	nonsignificant	chromodomain helicase DNA binding protein 3 [Source:RGD Symbol;Acc:1311923]
Abr	chr10	338	390	83.3394	87.6057	4.26633	1.05119	0.495892	0.925793	NotSig	-0.0574285	negligible	55.3607	64.7273	45.9941	0.230526	-2.07707	0.710583	0.0377954	0.203694	Not Sig	nonsignificant	ABR activator of RhoGEF and GTPase [Source:RGD Symbol;Acc:1306279]
Eif4a2	chr11	315	452	91.8482	86.8735	-4.97469	0.945838	0.501269	0.925793	NotSig	0.0725667	negligible	93.389	102.032	84.7457	0.175328	-1.67734	0.830576	0.0934765	0.331306	Not Sig	nonsignificant	eukaryotic translation initiation factor 4A2 [Source:RGD Symbol;Acc:1309225]
Galnt9	chr12	202	222	88.7804	92.5167	3.73625	1.04208	0.503539	0.925793	NotSig	-0.0536608	negligible	49.3386	49.2217	49.4554	0.227909	0.0840953	1.00475	0.932981	0.970277	Not Sig	nonsignificant	polypeptide N-acetylgalactosaminyltransferase 9 [Source:RGD Symbol;Acc:1311523]
LOC306766	chr17	183	179	74.4415	76.7875	2.34602	1.03151	0.502486	0.925793	NotSig	-0.118287	negligible	42.4913	38.7591	46.2235	0.233802	1.03938	1.19259	0.298629	0.606334	Not Sig	nonsignificant	hypothetical LOC306766 [Source:RGD Symbol;Acc:1359256]
Nrsn1	chr17	282	263	82.0377	77.1187	-4.91902	0.94004	0.499301	0.925793	NotSig	0.0700412	negligible	47.0968	46.8106	47.3831	0.234201	0.103653	1.01223	0.917445	0.96072	Not Sig	nonsignificant	neurensin 1 [Source:RGD Symbol;Acc:1307833]
Jph3	chr19	190	303	80.8561	85.3753	4.51928	1.05589	0.505518	0.925793	NotSig	-0.0435329	negligible	53.8714	64.5364	43.2063	0.231118	-2.51915	0.669487	0.0117638	0.112221	Not Sig	nonsignificant	junctophilin 3 [Source:RGD Symbol;Acc:1308416]
Oxct1	chr2	272	261	103.733	105.393	1.66041	1.01601	0.502079	0.925793	NotSig	-0.0565721	negligible	55.039	53.9933	56.0848	0.21645	0.281833	1.03874	0.778072	0.896659	Not Sig	nonsignificant	3-oxoacid CoA transferase 1 [Source:RGD Symbol;Acc:1584008]
Nsmf	chr3	981	1420	91.8995	90.7689	-1.13054	0.987698	0.505274	0.925793	NotSig	0.0365587	negligible	263.79	298.877	228.703	0.139311	-2.8236	0.765209	0.00474879	0.0776147	Not Sig	nonsignificant	NMDA receptor synaptonuclear signaling and neuronal migration factor [Source:RGD Symbol;Acc:619819]
Pltp	chr3	216	195	81.2269	79.2929	-1.93399	0.97619	0.496871	0.925793	NotSig	0.0890545	negligible	56.968	48.2199	65.7161	0.234415	1.84417	1.36284	0.065159	0.269205	Not Sig	nonsignificant	phospholipid transfer protein [Source:RGD Symbol;Acc:1306695]
Slc2a1	chr5	122	136	84.2291	88.6456	4.41654	1.05243	0.49694	0.925793	NotSig	-0.0787646	negligible	33.2511	33.0102	33.492	0.28721	0.16446	1.0146	0.869369	0.941157	Not Sig	nonsignificant	solute carrier family 2 member 1 [Source:RGD Symbol;Acc:3704]
Fndc5	chr5	259	238	75.895	79.7516	3.85656	1.05081	0.502486	0.925793	NotSig	-0.0729457	negligible	41.8646	38.5711	45.1582	0.254522	0.783707	1.17078	0.433212	0.693909	Not Sig	nonsignificant	fibronectin type III domain containing 5 [Source:RGD Symbol;Acc:708525]
Stx12	chr5	119	152	83.3399	92.8155	9.47558	1.1137	0.500862	0.925793	NotSig	-0.0324455	negligible	28.6017	29.1048	28.0986	0.286759	-0.175954	0.965429	0.86033	0.938866	Not Sig	nonsignificant	syntaxin 12 [Source:RGD Symbol;Acc:620977]
Chga	chr6	269	321	88.6713	85.5495	-3.12179	0.964794	0.499196	0.925793	NotSig	0.0632788	negligible	75.8359	75.0752	76.5965	0.184244	0.0901043	1.02026	0.928204	0.967807	Not Sig	nonsignificant	chromogranin A [Source:RGD Symbol;Acc:2338]
Mrpl54	chr7	121	97	68.9542	65.1074	-3.84687	0.944211	0.502943	0.925793	NotSig	0.178075	negligible	27.9493	22.2014	33.6972	0.282833	2.06777	1.51779	0.0386614	0.203694	Not Sig	nonsignificant	mitochondrial ribosomal protein L54 [Source:RGD Symbol;Acc:1305694]
Kcnh3	chr7	105	123	82.8047	77.8767	-4.928	0.940486	0.50171	0.925793	NotSig	0.131018	negligible	28.6692	29.1291	28.2093	0.28508	-0.258847	0.968423	0.795753	0.905006	Not Sig	nonsignificant	potassium voltage-gated channel subfamily H member 3 [Source:RGD Symbol;Acc:71070]
Cspg5	chr8	480	530	77.6276	80.4684	2.84074	1.03659	0.505926	0.925793	NotSig	-0.0782872	negligible	137.015	135.389	138.641	0.17766	0.324421	1.02403	0.745619	0.885389	Not Sig	nonsignificant	chondroitin sulfate proteoglycan 5 [Source:RGD Symbol;Acc:2431]
Rps18l1	chr10	49	38	49.2631	56.8438	7.58069	1.15388	0.501632	0.925793	NotSig	-0.259489	small	128.669	112.898	144.44	0.169232	2.096	1.27939	0.0360821	0.19893	Not Sig	nonsignificant	ribosomal protein S18-like 1 [Source:RGD Symbol;Acc:2321678]
Sez6l	chr12	395	447	93.3895	99.9478	6.55827	1.07022	0.507325	0.926657	NotSig	-0.0285743	negligible	40.5483	49.8672	31.2294	0.267915	-2.4776	0.626252	0.0132271	0.117124	Not Sig	nonsignificant	seizure related 6 homolog like [Source:RGD Symbol;Acc:1563628]
LOC100362895	chr5	388	419	88.5402	89.6761	1.13597	1.01283	0.507915	0.9272	NotSig	-0.0523986	negligible	57.1397	55.3003	58.9791	0.218842	0.439518	1.06652	0.660286	0.846472	Not Sig	nonsignificant
Alas2	chrX	277	209	41.4224	40.9715	-0.450978	0.989113	0.507769	0.9272	NotSig	0.00355171	negligible	76.2869	63.2916	89.2821	0.575857	0.883071	1.41065	0.377198	0.654202	Not Sig	nonsignificant	5'-aminolevulinate synthase 2 [Source:RGD Symbol;Acc:2084]
Cpne6	chr15	199	273	97.3054	104.176	6.87103	1.07061	0.508065	0.927213	NotSig	-0.035118	negligible	65.728	69.2469	62.2092	0.221002	-0.772669	0.898367	0.439718	0.696704	Not Sig	nonsignificant	copine 6 [Source:RGD Symbol;Acc:1583895]
Bnip3l	chr15	146	114	57.7159	54.428	-3.2879	0.943033	0.509839	0.927848	NotSig	-0.0297082	negligible	26.3083	20.1861	32.4306	0.320313	2.19512	1.60658	0.0281548	0.171713	Not Sig	nonsignificant	BCL2 interacting protein 3 like [Source:RGD Symbol;Acc:621354]
Mal2	chr7	218	296	75.8548	79.989	4.13419	1.0545	0.509755	0.927848	NotSig	-0.05041	negligible	40.4638	47.2698	33.6579	0.283657	-1.72039	0.712037	0.0853614	0.313054	Not Sig	nonsignificant	mal, T-cell differentiation protein 2 [Source:RGD Symbol;Acc:735066]
Paxx	chr3	140	115	90.7202	96.7875	6.06735	1.06688	0.510107	0.927951	NotSig	-0.140452	negligible	35.3043	28.7067	41.902	0.256776	2.2292	1.45966	0.0258006	0.163339	Not Sig	nonsignificant	PAXX, non-homologous end joining factor [Source:RGD Symbol;Acc:1306215]
Cntfr	chr5	111	127	78.6429	72.5043	-6.13854	0.921944	0.511314	0.928113	NotSig	0.156894	negligible	27.0253	25.963	28.0877	0.304784	0.337651	1.08184	0.735626	0.879266	Not Sig	nonsignificant	ciliary neurotrophic factor receptor [Source:RGD Symbol;Acc:1303100]
Rab15	chr6	156	194	75.2677	71.3564	-3.91129	0.948035	0.510926	0.928113	NotSig	0.0803432	negligible	25.1367	29.2181	21.0553	0.302311	-1.60618	0.720625	0.108234	0.361656	Not Sig	nonsignificant	RAB15, member RAS oncogene family [Source:RGD Symbol;Acc:735172]
RGD1311899	chr12	176	193	86.6271	90.9131	4.28604	1.04948	0.512659	0.929091	NotSig	0.0540183	negligible	50.1951	47.6022	52.7881	0.248037	0.612737	1.10894	0.54005	0.779526	Not Sig	nonsignificant
LOC100362684	chr5	906	707	46.5358	47.8761	1.34021	1.0288	0.513513	0.929474	NotSig	-0.0486275	negligible	204.907	164.901	244.914	0.158006	3.63033	1.48522	0.00028306	0.020491	FDR<0.05	nonsignificant
Ddx24	chr6	104	146	82.321	89.7387	7.41768	1.09011	0.514889	0.930122	NotSig	-0.0264284	negligible	32.242	35.5665	28.9176	0.270253	-1.14612	0.813058	0.251746	0.568516	Not Sig	nonsignificant	DEAD-box helicase 24 [Source:RGD Symbol;Acc:727929]
Sez6l2	chr1	376	422	89.2941	93.1513	3.85728	1.0432	0.517124	0.930349	NotSig	-0.0606068	negligible	99.5786	97.6542	101.503	0.183509	0.361155	1.03941	0.717984	0.872517	Not Sig	nonsignificant	seizure related 6 homolog like 2 [Source:RGD Symbol;Acc:1565281]
Prkar1a	chr10	438	519	86.1306	89.0913	2.96069	1.03437	0.517052	0.930349	NotSig	-0.0516904	negligible	86.2185	97.1399	75.2971	0.188159	-1.92055	0.775141	0.0547889	0.242616	Not Sig	nonsignificant	protein kinase cAMP-dependent type I regulatory subunit alpha [Source:RGD Symbol;Acc:3391]
LOC100360491	chr14	88	64	50.112	46.0581	-4.05394	0.919102	0.517248	0.930349	NotSig	0.188544	negligible	26.2519	23.6898	28.8141	0.290259	0.893732	1.21631	0.371465	0.653783	Not Sig	nonsignificant	60S ribosomal protein L13-like [Source:RGD Symbol;Acc:2322065]
Snap91	chr8	204	301	101.04	99.8818	-1.15858	0.988534	0.517458	0.930349	NotSig	0.0860628	negligible	54.1678	62.7689	45.5667	0.213272	-2.14189	0.725944	0.0322027	0.186821	Not Sig	nonsignificant	synaptosome associated protein 91 [Source:RGD Symbol;Acc:69276]
Sh3bgrl	chrX	181	148	79.2403	84.8812	5.64088	1.07119	0.516725	0.930349	NotSig	-0.121232	negligible	30.5201	28.9888	32.0514	0.269172	0.577356	1.10565	0.563699	0.796443	Not Sig	nonsignificant	SH3 domain binding glutamate-rich protein like [Source:RGD Symbol;Acc:1560520]
Slc25a39	chr10	172	159	51.3248	53.1494	1.82465	1.03555	0.51817	0.93037	NotSig	0.0158247	negligible	46.7955	42.1078	51.4831	0.271005	1.18233	1.22265	0.237073	0.556208	Not Sig	nonsignificant	solute carrier family 25, member 39 [Source:RGD Symbol;Acc:1306193]
Ndufs5	chr5	212	229	67.9681	65.2655	-2.70258	0.960238	0.517945	0.93037	NotSig	0.055356	negligible	34.7118	29.8691	39.5544	0.258792	1.47342	1.32426	0.140637	0.412173	Not Sig	nonsignificant	NADH:ubiquinone oxidoreductase subunit S5 [Source:RGD Symbol;Acc:1311081]
Arpc5	chr13	126	154	74.9668	70.0513	-4.91552	0.934431	0.519654	0.931307	NotSig	0.0994258	negligible	31.0847	34.5826	27.5868	0.291381	-1.04886	0.797706	0.294242	0.601858	Not Sig	nonsignificant	actin related protein 2/3 complex, subunit 5 [Source:RGD Symbol;Acc:1311791]
Mrpl48	chr1	129	105	68.484	74.7299	6.24587	1.0912	0.520403	0.931551	NotSig	-0.130337	negligible	28.4085	24.5657	32.2513	0.292981	1.47931	1.31286	0.139058	0.411711	Not Sig	nonsignificant	mitochondrial ribosomal protein L48 [Source:RGD Symbol;Acc:1307576]
Eif4a1	chr10	307	358	85.1351	87.9294	2.79431	1.03282	0.521545	0.931889	NotSig	-0.0520983	negligible	74.7717	75.7834	73.76	0.192297	-0.139699	0.973301	0.888898	0.948727	Not Sig	nonsignificant	eukaryotic translation initiation factor 4A1 [Source:RGD Symbol;Acc:735141]
Hapln4	chr16	251	282	141.717	149.453	7.73529	1.05458	0.524484	0.933107	NotSig	-0.0420822	negligible	29.2736	37.1818	21.3653	0.315533	-2.32325	0.574617	0.0201657	0.149512	Not Sig	nonsignificant	hyaluronan and proteoglycan link protein 4 [Source:RGD Symbol;Acc:1308408]
Ddx5	chr10	359	540	121.184	122.778	1.59438	1.01316	0.526331	0.933691	NotSig	0.0596011	negligible	92.1652	103.025	81.3049	0.173611	-1.98077	0.789173	0.0476171	0.222535	Not Sig	nonsignificant	DEAD-box helicase 5 [Source:RGD Symbol;Acc:619906]
Gpr37l1	chr13	461	542	74.7195	75.8368	1.11729	1.01495	0.526679	0.933691	NotSig	-0.0483478	negligible	72.0176	72.5385	71.4967	0.234822	-0.0916913	0.985638	0.926943	0.967807	Not Sig	nonsignificant	G protein-coupled receptor 37-like 1 [Source:RGD Symbol;Acc:628835]
Timm23	chr16	113	136	53.0807	55.9672	2.88658	1.05438	0.526901	0.933691	NotSig	-0.149115	negligible	27.8512	27.8797	27.8227	0.276806	-0.125691	0.997956	0.899976	0.953092	Not Sig	nonsignificant	translocase of inner mitochondrial membrane 23 [Source:RGD Symbol;Acc:3863]
LOC100362339	chr17	111	143	44.8989	43.0014	-1.89746	0.957739	0.526812	0.933691	NotSig	0.0889876	negligible	169.599	146.593	192.606	0.160259	2.40488	1.31388	0.0161777	0.132038	Not Sig	nonsignificant
Ndufb5	chr2	274	288	63.3152	66.3121	2.99693	1.04733	0.526534	0.933691	NotSig	-0.111293	negligible	73.5147	69.479	77.5504	0.202988	0.783884	1.11617	0.433108	0.693909	Not Sig	nonsignificant	NADH:ubiquinone oxidoreductase subunit B5 [Source:RGD Symbol;Acc:1305909]
Ncoa1	chr6	91	131	70.4467	73.2514	2.80463	1.03981	0.528013	0.93398	NotSig	-0.143541	negligible	28.3272	34.0064	22.6479	0.309035	-1.70056	0.665989	0.0890253	0.320838	Not Sig	nonsignificant	nuclear receptor coactivator 1 [Source:RGD Symbol;Acc:1309046]
Shisa5	chr8	103	117	73.635	79.3129	5.67791	1.07711	0.52838	0.934457	NotSig	-0.0480841	negligible	25.3615	24.1115	26.6114	0.298916	0.32281	1.10368	0.746839	0.885389	Not Sig	nonsignificant	shisa family member 5 [Source:RGD Symbol;Acc:1359661]
Alg2	chr5	203	231	91.4152	89.9125	-1.50269	0.983562	0.529377	0.934486	NotSig	0.030569	negligible	26.6868	33.0395	20.334	0.30817	-2.17366	0.615447	0.0297305	0.17679	Not Sig	nonsignificant	ALG2, alpha-1,3/1,6-mannosyltransferase [Source:RGD Symbol;Acc:1309940]
Naca	chr7	359	355	60.1257	62.8282	2.70246	1.04495	0.53059	0.934518	NotSig	-0.0880346	negligible	92.99	84.1175	101.862	0.177195	1.45908	1.21095	0.144542	0.415653	Not Sig	nonsignificant	nascent polypeptide associated complex subunit alpha [Source:RGD Symbol;Acc:1308642]
Hdlbp	chr9	140	162	84.4389	91.6427	7.20379	1.08531	0.530631	0.934518	NotSig	-0.134069	negligible	29.863	29.707	30.019	0.278439	0.12766	1.0105	0.898418	0.953092	Not Sig	nonsignificant	high density lipoprotein binding protein [Source:RGD Symbol;Acc:620962]
Elovl5	chr8	110	145	95.6829	91.638	-4.04489	0.957726	0.530354	0.934518	NotSig	0.039164	negligible	27.291	30.1376	24.4444	0.291598	-1.03936	0.811091	0.298636	0.606334	Not Sig	nonsignificant	ELOVL fatty acid elongase 5 [Source:RGD Symbol;Acc:620583]
Podxl2	chr4	172	194	86.8091	84.4793	-2.32978	0.973162	0.533816	0.936761	NotSig	0.0603769	negligible	48.5501	46.0306	51.0696	0.235529	0.575462	1.10947	0.564979	0.796443	Not Sig	nonsignificant	podocalyxin-like 2 [Source:RGD Symbol;Acc:1305815]
Cdk9	chr3	123	122	55.717	60.8139	5.0969	1.09148	0.535082	0.93708	NotSig	-0.181927	negligible	29.8838	26.3544	33.4132	0.27809	1.09002	1.26784	0.275703	0.586762	Not Sig	nonsignificant	cyclin-dependent kinase 9 [Source:RGD Symbol;Acc:1359638]
Bloc1s1	chr7	165	168	64.1136	67.824	3.71047	1.05787	0.535676	0.93708	NotSig	-0.0844428	negligible	41.853	36.7651	46.9408	0.239404	1.36257	1.27678	0.173018	0.46419	Not Sig	nonsignificant	biogenesis of lysosomal organelles complex-1, subunit 1 [Source:RGD Symbol;Acc:1307564]
Aamp	chr9	102	128	63.9457	69.5847	5.63904	1.08818	0.536306	0.93708	NotSig	0.00124982	negligible	30.1712	30.1269	30.2155	0.278131	-0.0412235	1.00294	0.967118	0.985162	Not Sig	nonsignificant	angio-associated, migratory cell protein [Source:RGD Symbol;Acc:1306281]
Anapc11	chr10	156	160	71.7464	75.7652	4.01881	1.05601	0.53885	0.937835	NotSig	-0.102235	negligible	40.9113	38.9464	42.8762	0.249723	0.716871	1.1009	0.473454	0.724541	Not Sig	nonsignificant
Akr1a1	chr5	425	372	77.664	80.3785	2.71452	1.03495	0.538158	0.937835	NotSig	0.00900894	negligible	106.063	91.3084	120.818	0.166377	2.43449	1.32319	0.014913	0.127334	Not Sig	nonsignificant	aldo-keto reductase family 1 member A1 [Source:RGD Symbol;Acc:68346]
Klc2	chr1	121	136	96.2752	106.769	10.4934	1.10899	0.542226	0.940176	NotSig	-0.0402601	negligible	27.6667	27.7119	27.6214	0.280792	-0.029093	0.996736	0.97679	0.98987	Not Sig	nonsignificant	kinesin light chain 2 [Source:RGD Symbol;Acc:1307377]
Gstm7	chr2	347	296	68.3379	73.0943	4.75637	1.0696	0.542316	0.940176	NotSig	-0.0563151	negligible	82.7414	68.6672	96.8157	0.179648	2.63327	1.40993	0.00845672	0.103119	Not Sig	nonsignificant	glutathione S-transferase, mu 7 [Source:RGD Symbol;Acc:621287]
Psmd1	chr9	85	131	63.1705	69.7749	6.60443	1.10455	0.542168	0.940176	NotSig	-0.0593244	negligible	28.3554	31.2147	25.4961	0.281353	-1.05795	0.816798	0.290079	0.597749	Not Sig	nonsignificant	proteasome 26S subunit, non-ATPase 1 [Source:RGD Symbol;Acc:621669]
Ctsa	chr3	152	185	81.0465	85.2609	4.21444	1.052	0.543245	0.94082	NotSig	-0.0394975	negligible	46.8388	47.8358	45.8419	0.226267	-0.30483	0.958318	0.760496	0.894227	Not Sig	nonsignificant	cathepsin A [Source:RGD Symbol;Acc:1309070]
Hid1	chr10	125	120	73.7655	79.8558	6.09027	1.08256	0.544548	0.94119	NotSig	-0.0120926	negligible	25.8081	23.7362	27.8799	0.292511	0.605731	1.17458	0.544693	0.78109	Not Sig	nonsignificant	HID1 domain containing [Source:RGD Symbol;Acc:1311422]
Lrp11	chr1	152	193	105.293	102.532	-2.76169	0.973771	0.548003	0.9421	NotSig	0.103187	negligible	35.1842	36.2751	34.0932	0.255051	-0.260007	0.939853	0.794858	0.905006	Not Sig	nonsignificant	LDL receptor related protein 11 [Source:RGD Symbol;Acc:1308602]
Rpl28	chr1	1086	868	52.8216	53.7664	0.944797	1.01789	0.548291	0.9421	NotSig	-0.0520367	negligible	109.252	90.7499	127.754	0.196695	2.51421	1.40776	0.0119298	0.112221	Not Sig	nonsignificant	ribosomal protein L28 [Source:RGD Symbol;Acc:621193]
Tpi1	chr4	477	491	86.9819	90.5982	3.61626	1.04157	0.548081	0.9421	NotSig	-0.0614332	negligible	113.911	109.413	118.409	0.165743	0.700999	1.08222	0.483303	0.729122	Not Sig	nonsignificant	triosephosphate isomerase 1 [Source:RGD Symbol;Acc:3896]
Srebf2	chr7	308	368	98.3003	99.5709	1.27054	1.01293	0.548166	0.9421	NotSig	-0.0280705	negligible	61.2149	65.75	56.6799	0.202481	-0.945042	0.862051	0.344637	0.633356	Not Sig	nonsignificant	sterol regulatory element binding transcription factor 2 [Source:RGD Symbol;Acc:1307751]
Ca11	chr1	134	116	111.489	105.289	-6.1991	0.944397	0.549221	0.942815	NotSig	0.0999669	negligible	31.7338	26.4492	37.0184	0.280281	1.73894	1.39961	0.0820462	0.305608	Not Sig	nonsignificant
Ptgds	chr3	1345	1376	93.8064	93.3917	-0.41469	0.995579	0.549665	0.942815	NotSig	0.0370767	negligible	354.591	330.785	378.397	0.14087	1.41155	1.14394	0.158082	0.435817	Not Sig	nonsignificant	prostaglandin D2 synthase [Source:RGD Symbol;Acc:3433]
Dctn3	chr5	111	106	85.1484	77.881	-7.2674	0.91465	0.549778	0.942815	NotSig	0.0946354	negligible	25.959	24.1807	27.7373	0.301418	0.605087	1.14708	0.545121	0.78109	Not Sig	nonsignificant	dynactin subunit 3 [Source:RGD Symbol;Acc:1309547]
Nsg2	chr10	1080	1259	94.1716	95.9792	1.80764	1.0192	0.550403	0.943248	NotSig	-0.0425221	negligible	207.11	228.242	185.978	0.158001	-1.90026	0.814828	0.057399	0.248878	Not Sig	nonsignificant	neuronal vesicle trafficking associated 2 [Source:RGD Symbol;Acc:1563944]
Ap1s1	chr12	130	129	76.7057	73.8097	-2.89609	0.962244	0.551995	0.943867	NotSig	-0.0177387	negligible	30.1265	29.0834	31.1697	0.277507	0.465814	1.07173	0.641349	0.84127	Not Sig	nonsignificant	adaptor related protein complex 1 subunit sigma 1 [Source:RGD Symbol;Acc:1305911]
Sv2a	chr2	342	343	83.134	87.1685	4.03444	1.04853	0.552043	0.943867	NotSig	-0.0302368	negligible	52.0297	54.2006	49.8588	0.222783	-0.573692	0.919893	0.566176	0.796443	Not Sig	nonsignificant	synaptic vesicle glycoprotein 2a [Source:RGD Symbol;Acc:619715]
Scand1	chr3	288	280	58.3732	61.6098	3.23653	1.05545	0.552327	0.944183	NotSig	-0.122506	negligible	73.1801	65.4824	80.8777	0.189995	1.59415	1.23511	0.110902	0.366373	Not Sig	nonsignificant	SCAN domain-containing 1 [Source:RGD Symbol;Acc:1308530]
Ezr	chr1	163	143	84.7207	90.4606	5.73992	1.06775	0.55831	0.944334	NotSig	-0.031494	negligible	37.2098	31.8676	42.5521	0.24528	1.66785	1.33528	0.0953451	0.332502	Not Sig	nonsignificant	ezrin [Source:RGD Symbol;Acc:621161]
Ppp1r9b	chr10	830	1024	85.2963	87.4714	2.17503	1.0255	0.556687	0.944334	NotSig	-0.0325106	negligible	136.058	157.766	114.35	0.167489	-2.69375	0.724805	0.00706536	0.0972217	Not Sig	nonsignificant	protein phosphatase 1, regulatory subunit 9B [Source:RGD Symbol;Acc:632281]
Tmem130	chr12	765	872	79.7434	80.9949	1.25153	1.01569	0.555179	0.944334	NotSig	-0.0141477	negligible	153.629	165.231	142.027	0.181533	-1.23171	0.859568	0.218059	0.527715	Not Sig	nonsignificant	transmembrane protein 130 [Source:RGD Symbol;Acc:1563248]
Cabp7	chr14	264	308	84.9101	88.3342	3.42416	1.04033	0.557929	0.944334	NotSig	-0.0829144	negligible	45.6233	51.3604	39.8863	0.227843	-1.48879	0.776595	0.136543	0.408891	Not Sig	nonsignificant	calcium binding protein 7 [Source:RGD Symbol;Acc:1359269]
Hnrnpc	chr15	169	253	88.1521	90.5255	2.37339	1.02692	0.55345	0.944334	NotSig	-0.0992687	negligible	50.1306	60.3689	39.8922	0.230702	-2.53485	0.660807	0.0112496	0.112221	Not Sig	nonsignificant
Ndfip2	chr15	127	182	80.0844	84.6574	4.573	1.0571	0.554234	0.944334	NotSig	-0.0747432	negligible	37.1825	40.4997	33.8653	0.257546	-1.11643	0.836185	0.264238	0.577739	Not Sig	nonsignificant	Nedd4 family interacting protein 2 [Source:RGD Symbol;Acc:1309716]
Atp5f1c	chr17	272	278	70.8049	73.23	2.42506	1.03425	0.559997	0.944334	NotSig	-0.027574	negligible	73.2868	67.0323	79.5412	0.197181	1.12691	1.18661	0.25978	0.574185	Not Sig	nonsignificant	ATP synthase F1 subunit gamma [Source:RGD Symbol;Acc:620011]
Pbxip1	chr2	118	124	63.3579	68.6926	5.33476	1.0842	0.55844	0.944334	NotSig	-0.0720064	negligible	28.2738	28.3196	28.2279	0.277197	0.0859503	0.996762	0.931506	0.969348	Not Sig	nonsignificant	PBX homeobox interacting protein 1 [Source:RGD Symbol;Acc:1305180]
Cbs	chr20	113	119	83.8461	81.6416	-2.20444	0.973708	0.559081	0.944334	NotSig	0.115615	negligible	29.457	27.0843	31.8298	0.272677	0.819449	1.17521	0.41253	0.683915	Not Sig	nonsignificant	cystathionine beta synthase [Source:RGD Symbol;Acc:2287]
LOC120102105	chr3	1170	812	46.0292	45.4925	-0.536776	0.988338	0.560451	0.944334	NotSig	0.0242515	negligible	427.839	345.002	510.676	0.598265	0.949828	1.48021	0.3422	0.631862	Not Sig	nonsignificant	18S ribosomal RNA [Source:RGD Symbol;Acc:41236247]
Pdia3	chr3	348	419	69.4073	71.5633	2.15601	1.03106	0.553828	0.944334	NotSig	-0.014168	negligible	94.7731	88.9217	100.624	0.18327	0.783331	1.13161	0.433433	0.693909	Not Sig	nonsignificant	protein disulfide isomerase family A, member 3 [Source:RGD Symbol;Acc:68430]
Eps15	chr5	222	236	77.4886	82.6714	5.18283	1.06689	0.55339	0.944334	NotSig	-0.067623	negligible	36.053	39.4383	32.6677	0.250943	-1.02768	0.828324	0.304098	0.609294	Not Sig	nonsignificant	epidermal growth factor receptor pathway substrate 15 [Source:RGD Symbol;Acc:1305550]
Prepl	chr6	178	232	98.9445	105.45	6.50575	1.06575	0.55669	0.944334	NotSig	-0.0245583	negligible	30.8604	39.7106	22.0103	0.275831	-3.08984	0.554268	0.00200265	0.049056	FDR<0.05	nonsignificant	prolyl endopeptidase-like [Source:RGD Symbol;Acc:1310143]
Icam5	chr8	413	493	82.9709	87.5428	4.5719	1.0551	0.557327	0.944334	NotSig	-0.0353414	negligible	113.856	112.881	114.83	0.166588	-0.0144801	1.01727	0.988447	0.995623	Not Sig	nonsignificant	intercellular adhesion molecule 5 [Source:RGD Symbol;Acc:1305039]
Ttyh3	chr12	297	353	76.3388	79.8926	3.55378	1.04655	0.561547	0.945011	NotSig	-0.0231973	negligible	37.6625	46.5533	28.7717	0.266091	-2.55831	0.618038	0.0105181	0.110839	Not Sig	nonsignificant	tweety family member 3 [Source:RGD Symbol;Acc:1309549]
Stk25	chr9	130	153	108.51	100.66	-7.84988	0.927657	0.562825	0.945986	NotSig	0.069128	negligible	35.6449	35.4036	35.8863	0.251731	-0.0401127	1.01363	0.968003	0.985162	Not Sig	nonsignificant	serine/threonine kinase 25 [Source:RGD Symbol;Acc:727809]
Stip1	chr1	106	168	99.9345	96.1229	-3.8116	0.961859	0.567215	0.946005	NotSig	0.0778759	negligible	35.448	41.0787	29.8173	0.263038	-1.64532	0.725857	0.0999039	0.342969	Not Sig	nonsignificant	stress-induced phosphoprotein 1 [Source:RGD Symbol;Acc:621599]
Gps1	chr10	106	99	82.6435	90.3351	7.69161	1.09307	0.569346	0.946005	NotSig	-0.0631868	negligible	27.5383	25.3243	29.7524	0.297455	0.874628	1.17486	0.381776	0.65746	Not Sig	nonsignificant	G protein pathway suppressor 1 [Source:RGD Symbol;Acc:621532]
Lsamp	chr11	350	320	83.89	87.8687	3.97867	1.04743	0.56527	0.946005	NotSig	-0.0319123	negligible	28.2343	25.8303	30.6383	0.291524	0.811273	1.18614	0.417209	0.685062	Not Sig	nonsignificant	limbic system-associated membrane protein [Source:RGD Symbol;Acc:71102]
Hnrnpk	chr17	264	358	96.1707	92.1144	-4.05623	0.957823	0.564122	0.946005	NotSig	0.033496	negligible	50.9922	57.9148	44.0696	0.216431	-1.91096	0.760939	0.0560094	0.24509	Not Sig	nonsignificant	heterogeneous nuclear ribonucleoprotein K [Source:RGD Symbol;Acc:71058]
Atp6v0d1	chr19	316	346	78.2203	78.6644	0.444112	1.00568	0.56686	0.946005	NotSig	0.0498787	negligible	89.7396	88.2304	91.2488	0.177692	0.334975	1.03421	0.737644	0.881046	Not Sig	nonsignificant	ATPase H+ transporting V0 subunit D1 [Source:RGD Symbol;Acc:1306159]
Smim29	chr20	133	117	87.3264	92.8853	5.55891	1.06366	0.567704	0.946005	NotSig	-0.0190135	negligible	31.6487	26.3575	36.9399	0.278352	1.5567	1.40149	0.119542	0.375079	Not Sig	nonsignificant	small integral membrane protein 29 [Source:RGD Symbol;Acc:1564450]
Abca2	chr3	313	301	104.917	102.598	-2.31839	0.977903	0.56574	0.946005	NotSig	0.0268968	negligible	80.8748	74.7363	87.0134	0.179782	1.21586	1.16427	0.224037	0.539567	Not Sig	nonsignificant	ATP binding cassette subfamily A member 2 [Source:RGD Symbol;Acc:620238]
LOC100360117	chr3	192	165	53.1816	54.9801	1.79845	1.03382	0.566303	0.946005	NotSig	-0.0209645	negligible	148.131	134.933	161.328	0.173647	1.48042	1.19561	0.138762	0.411711	Not Sig	nonsignificant
Rpn2	chr3	200	204	72.0769	71.1249	-0.952016	0.986792	0.571472	0.946005	NotSig	0.0593974	negligible	55.4147	53.0366	57.7928	0.213575	0.661594	1.08968	0.508231	0.752182	Not Sig	nonsignificant	ribophorin II [Source:RGD Symbol;Acc:62075]
Eef1a2	chr3	1073	1410	84.8948	86.8183	1.92351	1.02266	0.567221	0.946005	NotSig	-0.00660787	negligible	324.681	351.624	297.737	0.15227	-1.51642	0.84675	0.129412	0.39472	Not Sig	nonsignificant	eukaryotic translation elongation factor 1 alpha 2 [Source:RGD Symbol;Acc:3781]
Nrbp2	chr7	147	156	136.86	150.832	13.9713	1.10208	0.564187	0.946005	NotSig	-0.0347563	negligible	36.7877	36.9206	36.6547	0.2575	-0.103734	0.992798	0.91738	0.96072	Not Sig	nonsignificant	nuclear receptor binding protein 2 [Source:RGD Symbol;Acc:1591749]
Prkcsh	chr8	198	222	93.3768	89.4966	-3.88022	0.958446	0.566942	0.946005	NotSig	0.0533022	negligible	58.3831	57.5614	59.2048	0.21829	0.368461	1.02855	0.71253	0.871044	Not Sig	nonsignificant	protein kinase C substrate 80K-H [Source:RGD Symbol;Acc:1309628]
Cck	chr8	822	965	76.0388	77.5691	1.53028	1.02012	0.567906	0.946005	NotSig	0.00687769	negligible	236.325	235.277	237.373	0.145319	0.141774	1.00891	0.887258	0.947585	Not Sig	nonsignificant	cholecystokinin [Source:RGD Symbol;Acc:2288]
Gnl1	chr20	187	194	57.0846	58.6398	1.5552	1.02724	0.568047	0.946005	NotSig	-0.0893106	negligible	53.7473	50.5874	56.9073	0.216455	0.874595	1.12493	0.381794	0.65746	Not Sig	nonsignificant	G protein nucleolar 1 [Source:RGD Symbol;Acc:1303051]
Atp6v1d	chr6	154	179	73.5228	71.4709	-2.05187	0.972092	0.574702	0.947898	NotSig	0.0913009	negligible	41.6621	41.2935	42.0308	0.237038	0.0575245	1.01786	0.954127	0.980605	Not Sig	nonsignificant	ATPase H+ transporting V1 subunit D [Source:RGD Symbol;Acc:735119]
Bscl2	chr1	115	121	70.9759	73.2645	2.28856	1.03224	0.576201	0.948164	NotSig	-0.10583	negligible	30.8802	28.6277	33.1327	0.270965	0.631971	1.15737	0.527406	0.769852	Not Sig	nonsignificant	BSCL2 lipid droplet biogenesis associated, seipin [Source:RGD Symbol;Acc:1308135]
Aldh2	chr12	137	116	71.7168	74.8547	3.13792	1.04375	0.57698	0.948164	NotSig	-0.141851	negligible	34.2366	28.3121	40.161	0.28061	1.76607	1.41851	0.0773843	0.293496	Not Sig	nonsignificant	aldehyde dehydrogenase 2 family member [Source:RGD Symbol;Acc:69219]
Gpx4	chr7	809	670	73.6754	73.4115	-0.263916	0.996418	0.577152	0.948164	NotSig	0.0306417	negligible	201.007	171.92	230.095	0.172045	2.5366	1.33838	0.0111935	0.112221	Not Sig	nonsignificant	glutathione peroxidase 4 [Source:RGD Symbol;Acc:69226]
Mea1	chr9	147	125	70.4757	73.2604	2.78471	1.03951	0.576589	0.948164	NotSig	0.000900854	negligible	34.5775	29.0935	40.0615	0.255467	1.66941	1.37699	0.0950369	0.332502	Not Sig	nonsignificant	male-enhanced antigen 1 [Source:RGD Symbol;Acc:1597751]
Coro1a	chr1	79	125	77.515	85.5446	8.02959	1.10359	0.577138	0.948164	NotSig	0.00578271	negligible	26.9842	30.4483	23.5201	0.296493	-1.18758	0.772458	0.234999	0.553429	Not Sig	nonsignificant	coronin 1A [Source:RGD Symbol;Acc:620009]
Eif3g	chr8	126	117	54.3751	57.3349	2.95975	1.05443	0.57744	0.948289	NotSig	-0.0492613	negligible	32.0402	28.8822	35.1983	0.280337	1.00321	1.21868	0.315759	0.613339	Not Sig	nonsignificant	eukaryotic translation initiation factor 3, subunit G [Source:RGD Symbol;Acc:1307191]
RGD1560394	chr14	99	126	86.8974	91.2328	4.33538	1.04989	0.578172	0.948335	NotSig	-0.0938533	negligible	29.9707	31.8698	28.0716	0.29072	-0.518645	0.880822	0.604008	0.816957	Not Sig	nonsignificant	RGD1560394 [Source:RGD Symbol;Acc:1560394]
Nell2	chr7	782	880	83.3368	87.046	3.70918	1.04451	0.578322	0.948335	NotSig	-0.00906031	negligible	221.625	220.311	222.939	0.146377	0.153708	1.01193	0.87784	0.942724	Not Sig	nonsignificant	neural EGFL like 2 [Source:RGD Symbol;Acc:620999]
Anxa6	chr10	188	190	86.3642	90.7335	4.36933	1.05059	0.583393	0.948457	NotSig	-0.054958	negligible	48.8624	47.8539	49.871	0.219464	0.296202	1.04215	0.767076	0.896076	Not Sig	nonsignificant	annexin A6 [Source:RGD Symbol;Acc:621172]
Wsb2	chr12	278	331	94.6299	91.0354	-3.59457	0.962014	0.582318	0.948457	NotSig	0.0175231	negligible	72.1473	75.6003	68.6943	0.193876	-0.639879	0.90865	0.522251	0.765448	Not Sig	nonsignificant	WD repeat and SOCS box-containing 2 [Source:RGD Symbol;Acc:1359599]
Dad1	chr15	325	342	76.2206	79.7247	3.50406	1.04597	0.581641	0.948457	NotSig	-0.0405648	negligible	91.5328	81.4076	101.658	0.198586	1.56567	1.24875	0.117426	0.374548	Not Sig	nonsignificant	defender against cell death 1 [Source:RGD Symbol;Acc:621028]
Snap25	chr3	419	477	110.849	114.673	3.82393	1.0345	0.580604	0.948457	NotSig	-0.0339308	negligible	56.9959	60.8269	53.1648	0.290673	-0.732831	0.874034	0.463662	0.713491	Not Sig	nonsignificant	synaptosome associated protein 25 [Source:RGD Symbol;Acc:3728]
Clec2l	chr4	198	219	92.7457	92.9877	0.241946	1.00261	0.583396	0.948457	NotSig	0.00743095	negligible	47.2374	44.7333	49.7415	0.235385	0.454826	1.11196	0.649234	0.843853	Not Sig	nonsignificant	C-type lectin domain family 2, member L [Source:RGD Symbol;Acc:1565373]
Lgmn	chr6	169	181	88.1097	85.0202	-3.08951	0.964936	0.582483	0.948457	NotSig	0.0644984	negligible	44.7659	43.4415	46.0903	0.228621	0.346366	1.06097	0.729068	0.877094	Not Sig	nonsignificant	legumain [Source:RGD Symbol;Acc:619832]
Mid1ip1	chrX	142	136	73.4295	74.997	1.56751	1.02135	0.580815	0.948457	NotSig	-0.0570914	negligible	27.588	25.2078	29.9683	0.283864	0.69864	1.18885	0.484777	0.730456	Not Sig	nonsignificant	MID1 interacting protein 1 [Source:RGD Symbol;Acc:1303258]
Snf8	chr10	187	170	48.0061	50.8013	2.79522	1.05823	0.584473	0.948539	NotSig	-0.0773447	negligible	46.3293	40.8507	51.8079	0.239134	1.44694	1.26823	0.147915	0.422824	Not Sig	nonsignificant	SNF8 subunit of ESCRT-II [Source:RGD Symbol;Acc:1310144]
LOC100134871	chr1	707	418	35.459	34.579	-0.880032	0.975182	0.584977	0.948718	NotSig	0.0231142	negligible	281.605	205.718	357.492	0.805965	0.990144	1.73777	0.322104	0.62072	Not Sig	nonsignificant	beta globin minor gene [Source:RGD Symbol;Acc:2290038]
Apbb1	chr1	246	334	88.6578	88.1728	-0.484988	0.99453	0.585574	0.948718	NotSig	0.109937	negligible	75.263	79.1672	71.3588	0.190604	-0.773252	0.901367	0.439374	0.696704	Not Sig	nonsignificant	amyloid beta precursor protein binding family B member 1 [Source:RGD Symbol;Acc:2122]
Swi5	chr3	160	160	71.2416	72.7798	1.53818	1.02159	0.586154	0.949334	NotSig	0.000462686	negligible	42.6187	38.7502	46.4871	0.232096	1.15497	1.19966	0.248103	0.568516	Not Sig	nonsignificant	SWI5 homologous recombination repair protein [Source:RGD Symbol;Acc:1559966]
Vdac1	chr10	323	437	96.6725	92.3675	-4.30502	0.955468	0.588753	0.949941	NotSig	0.0574963	negligible	88.752	97.1794	80.3246	0.175763	-1.55705	0.82656	0.119457	0.375079	Not Sig	nonsignificant	voltage-dependent anion channel 1 [Source:RGD Symbol;Acc:621575]
Tsc22d4	chr12	411	374	53.6719	56.0177	2.34574	1.04371	0.588729	0.949941	NotSig	-0.0303052	negligible	101.655	86.2596	117.05	0.186658	2.38854	1.35695	0.0169154	0.136059	Not Sig	nonsignificant	TSC22 domain family, member 4 [Source:RGD Symbol;Acc:1584380]
Gpat4	chr16	95	116	82.9112	85.1295	2.2183	1.02676	0.587252	0.949941	NotSig	-0.0319676	negligible	26.0829	26.9443	25.2216	0.286441	-0.250583	0.936065	0.802136	0.908542	Not Sig	nonsignificant	glycerol-3-phosphate acyltransferase 4 [Source:RGD Symbol;Acc:1310520]
LOC288913	chr19	113	112	73.1784	80.3016	7.12316	1.09734	0.588665	0.949941	NotSig	-0.0185433	negligible	25.4462	22.2272	28.6653	0.317624	0.963498	1.28965	0.335298	0.628825	Not Sig	nonsignificant	similar to LEYDIG CELL TUMOR 10 KD PROTEIN [Source:RGD Symbol;Acc:735128]
Lyz2	chr7	104	92	97.7137	99.5405	1.82677	1.0187	0.588335	0.949941	NotSig	-0.0593195	negligible	26.4242	22.2576	30.5908	0.286201	1.59434	1.3744	0.110861	0.366373	Not Sig	nonsignificant	lysozyme 2 [Source:RGD Symbol;Acc:3026]
Cacna2d3	chr16	125	160	79.9804	75.111	-4.8694	0.939118	0.590004	0.95026	NotSig	0.0493589	negligible	36.2448	37.1966	35.2931	0.253543	-0.289498	0.948827	0.7722	0.896501	Not Sig	nonsignificant	calcium voltage-gated channel auxiliary subunit alpha2delta 3 [Source:RGD Symbol;Acc:631361]
Sec62	chr2	230	251	81.1941	87.2249	6.03081	1.07428	0.591814	0.95026	NotSig	0.00550262	negligible	45.2632	46.8475	43.679	0.233326	-0.399289	0.932364	0.689681	0.860163	Not Sig	nonsignificant	SEC62 homolog, preprotein translocation factor [Source:RGD Symbol;Acc:1308862]
Cadm1	chr8	256	262	77.0794	76.1767	-0.902703	0.988289	0.590288	0.95026	NotSig	0.0754976	negligible	25.3908	28.2064	22.5753	0.297323	-1.17447	0.800361	0.240208	0.560739	Not Sig	nonsignificant	cell adhesion molecule 1 [Source:RGD Symbol;Acc:1310999]
Nsf	chr10	369	595	107.097	111.356	4.25863	1.03976	0.59207	0.950333	NotSig	-0.00677025	negligible	87.8202	112.266	63.3742	0.219333	-3.70219	0.564499	0.000213746	0.016947	FDR<0.05	nonsignificant	N-ethylmaleimide sensitive factor, vesicle fusing ATPase [Source:RGD Symbol;Acc:621594]
Itih3	chr16	229	187	84.4259	80.3345	-4.09146	0.951538	0.592711	0.950333	NotSig	0.0871626	negligible	55.0314	45.0356	65.0272	0.22584	2.41539	1.44391	0.0157183	0.13028	Not Sig	nonsignificant	inter-alpha trypsin inhibitor, heavy chain 3 [Source:RGD Symbol;Acc:620633]
Dennd5a	chr1	395	399	78.3388	77.1989	-1.13992	0.985449	0.594083	0.950758	NotSig	0.00288533	negligible	100.045	94.488	105.601	0.165384	0.942252	1.11761	0.346064	0.635277	Not Sig	nonsignificant	DENN domain containing 5A [Source:RGD Symbol;Acc:1306759]
LOC108349682	chr1	90	93	47.748	51.5862	3.83826	1.08039	0.598707	0.950758	NotSig	-0.129394	negligible	134.066	112.528	155.604	0.222819	2.20663	1.38281	0.0273402	0.168598	Not Sig	nonsignificant
Nrxn2	chr1	486	580	66.919	67.0857	0.16677	1.00249	0.596987	0.950758	NotSig	0.0208666	negligible	76.6867	85.7675	67.6058	0.211189	-1.60548	0.788245	0.108388	0.361656	Not Sig	nonsignificant	neurexin 2 [Source:RGD Symbol;Acc:620211]
Ppp2ca	chr10	225	249	81.3316	83.856	2.52441	1.03104	0.59669	0.950758	NotSig	-0.0261937	negligible	50.0092	50.5333	49.4851	0.215905	-0.159709	0.979257	0.87311	0.942538	Not Sig	nonsignificant	protein phosphatase 2 catalytic subunit alpha [Source:RGD Symbol;Acc:3380]
Atp5pd	chr10	523	556	55.3117	56.9221	1.61034	1.02911	0.599122	0.950758	NotSig	-0.0231126	negligible	134.98	127.841	142.119	0.163429	0.871613	1.11168	0.383419	0.65746	Not Sig	nonsignificant	ATP synthase peripheral stalk subunit d [Source:RGD Symbol;Acc:620083]
Bri3	chr12	149	126	75.0983	77.807	2.70868	1.03607	0.595855	0.950758	NotSig	-0.00659619	negligible	38.9062	33.4557	44.3568	0.248925	1.78626	1.32584	0.0740576	0.286616	Not Sig	nonsignificant	brain protein I3 [Source:RGD Symbol;Acc:1309187]
Rpl31l4	chr12	62	61	43.7693	46.7808	3.01144	1.0688	0.595241	0.950758	NotSig	-0.0385224	negligible	108.196	88.8154	127.577	0.183577	2.80948	1.43642	0.0049621	0.0779425	Not Sig	nonsignificant	ribosomal protein L31-like 4 [Source:RGD Symbol;Acc:2319106]
Pcdh8	chr15	94	132	81.0279	81.3822	0.354232	1.00437	0.594345	0.950758	NotSig	0.14205	negligible	25.0732	27.2751	22.8713	0.301113	-0.846508	0.838541	0.397269	0.671526	Not Sig	nonsignificant	protocadherin 8 [Source:RGD Symbol;Acc:69350]
Kif5c	chr3	602	572	95.6004	94.891	-0.709416	0.992579	0.596168	0.950758	NotSig	0.0218662	negligible	57.6743	70.5382	44.8103	0.239547	-2.58734	0.635263	0.00967193	0.108779	Not Sig	nonsignificant	kinesin family member 5C [Source:RGD Symbol;Acc:1308539]
Rnf220	chr5	122	139	82.7363	88.2081	5.47183	1.06614	0.60123	0.950758	NotSig	-0.115079	negligible	27.7506	27.3026	28.1986	0.27821	0.0861075	1.03281	0.931381	0.969348	Not Sig	nonsignificant	ring finger protein 220 [Source:RGD Symbol;Acc:1598210]
Capzb	chr5	230	225	73.9456	75.5565	1.61083	1.02178	0.594481	0.950758	NotSig	-0.0285093	negligible	47.5258	43.7897	51.262	0.238686	0.856165	1.17064	0.391907	0.666215	Not Sig	nonsignificant	capping actin protein of muscle Z-line subunit beta [Source:RGD Symbol;Acc:1359099]
Ifi27	chr6	233	220	75.3491	72.7523	-2.59683	0.965536	0.601123	0.950758	NotSig	0.0374363	negligible	60.4044	53.0842	67.7245	0.219768	1.66792	1.27579	0.0953316	0.332502	Not Sig	nonsignificant	interferon, alpha-inducible protein 27 [Source:RGD Symbol;Acc:69404]
Timm13	chr7	226	212	91.391	88.43	-2.96098	0.967601	0.60144	0.950758	NotSig	0.0701097	negligible	53.8606	48.711	59.0101	0.220804	1.32104	1.21143	0.186487	0.484876	Not Sig	nonsignificant	translocase of inner mitochondrial membrane 13 [Source:RGD Symbol;Acc:628845]
Ap3d1	chr7	153	155	74.4393	78.0189	3.5796	1.04809	0.599353	0.950758	NotSig	-0.0599748	negligible	36.2072	34.6416	37.7728	0.258714	0.402784	1.09039	0.687107	0.85825	Not Sig	nonsignificant	adaptor related protein complex 3 subunit delta 1 [Source:RGD Symbol;Acc:1308659]
Enpp2	chr7	164	188	104.504	109.052	4.54779	1.04352	0.600658	0.950758	NotSig	-0.0121995	negligible	44.5799	43.8564	45.3034	0.258072	0.107821	1.03299	0.914138	0.959672	Not Sig	nonsignificant	ectonucleotide pyrophosphatase/phosphodiesterase 2 [Source:RGD Symbol;Acc:69298]
Puf60	chr7	125	169	82.8227	91.172	8.34933	1.10081	0.595558	0.950758	NotSig	-0.04192	negligible	38.2904	40.8302	35.7506	0.240826	-0.813819	0.875593	0.415749	0.684659	Not Sig	nonsignificant	poly-U binding splicing factor 60 [Source:RGD Symbol;Acc:621674]
Rasgrf1	chr8	254	336	74.9368	77.6383	2.70147	1.03605	0.596469	0.950758	NotSig	0.0120574	negligible	76.1905	82.8514	69.5296	0.187713	-1.25902	0.839208	0.208025	0.513889	Not Sig	nonsignificant	RAS protein-specific guanine nucleotide-releasing factor 1 [Source:RGD Symbol;Acc:620395]
LOC120095146	chr10	37	28	64.9594	59.2027	-5.7567	0.91138	0.596097	0.950758	NotSig	0.180242	negligible	236.952	207.515	266.389	0.129088	2.77515	1.28371	0.00551765	0.0842834	Not Sig	nonsignificant
Npdc1	chr3	438	431	79.4214	78.0974	-1.32401	0.983329	0.601877	0.951108	NotSig	0.0177776	negligible	110.652	100.48	120.823	0.164506	1.52439	1.20247	0.127411	0.391402	Not Sig	nonsignificant	neural proliferation, differentiation and control, 1 [Source:RGD Symbol;Acc:1303156]
Itm2a	chrX	129	145	94.011	97.3148	3.30379	1.03514	0.601935	0.951108	NotSig	-0.0280047	negligible	35.3568	33.9686	36.7449	0.258385	0.381155	1.08173	0.703088	0.867186	Not Sig	nonsignificant	integral membrane protein 2A [Source:RGD Symbol;Acc:1559423]
Sec11c	chr18	338	417	63.1705	64.1885	1.01798	1.01611	0.602233	0.951133	NotSig	-0.0352231	negligible	88.0847	89.3727	86.7967	0.178229	-0.301048	0.971177	0.763378	0.896076	Not Sig	nonsignificant	SEC11 homolog C, signal peptidase complex subunit [Source:RGD Symbol;Acc:628665]
Acly	chr10	129	156	90.9419	103.327	12.385	1.13619	0.602676	0.951174	NotSig	-0.0351608	negligible	31.6673	33.1097	30.2248	0.272194	-0.507574	0.912867	0.611752	0.820772	Not Sig	nonsignificant	ATP citrate lyase [Source:RGD Symbol;Acc:2018]
Cacnb3	chr7	151	167	86.3541	82.9475	-3.40662	0.960551	0.602839	0.951273	NotSig	0.0736136	negligible	36.6376	36.3806	36.8945	0.252776	0.0199298	1.01413	0.984099	0.992444	Not Sig	nonsignificant	calcium voltage-gated channel auxiliary subunit beta 3 [Source:RGD Symbol;Acc:2248]
Rpn1	chr4	337	369	87.257	86.869	-0.388003	0.995553	0.603056	0.951457	NotSig	0.0491877	negligible	94.3375	92.9958	95.6791	0.174381	0.255041	1.02885	0.798692	0.906559	Not Sig	nonsignificant	ribophorin I [Source:RGD Symbol;Acc:3594]
Psat1	chr1	291	272	79.892	81.0901	1.19805	1.015	0.605027	0.951908	NotSig	-0.0531539	negligible	68.1234	61.2816	74.9653	0.198828	1.47395	1.22329	0.140494	0.412173	Not Sig	nonsignificant	phosphoserine aminotransferase 1 [Source:RGD Symbol;Acc:735170]
Sucla2	chr15	116	128	95.5752	98.8922	3.31703	1.03471	0.604073	0.951908	NotSig	-0.0896425	negligible	28.3134	29.5736	27.0532	0.282329	-0.368917	0.914773	0.71219	0.871044	Not Sig	nonsignificant	succinate-CoA ligase ADP-forming subunit beta [Source:RGD Symbol;Acc:1309397]
Emc3	chr4	145	169	93.0555	96.8231	3.76757	1.04049	0.604838	0.951908	NotSig	-0.0902473	negligible	33.5232	32.775	34.2714	0.271991	0.0517226	1.04566	0.95875	0.981751	Not Sig	nonsignificant	ER membrane protein complex subunit 3 [Source:RGD Symbol;Acc:1311566]
LOC100363469	chr10	13	12	49.2648	61.2791	12.0142	1.24387	0.605274	0.951908	NotSig	-0.282966	small	88.7007	69.4848	107.917	0.183622	3.53479	1.5531	0.000408095	0.0234009	FDR<0.05	nonsignificant	ribosomal protein S24-like [Source:RGD Symbol;Acc:2322976]
Rps17	chr1	556	480	54.5375	56.2413	1.70386	1.03124	0.606641	0.952379	NotSig	-0.0458269	negligible	69.2362	60.7107	77.7617	0.23618	1.67255	1.28086	0.0944164	0.332502	Not Sig	nonsignificant	ribosomal protein S17 [Source:RGD Symbol;Acc:62027]
Ppp3cb	chr15	269	348	92.2012	90.6894	-1.51172	0.983604	0.606472	0.952379	NotSig	0.0769573	negligible	59.6357	64.0936	55.1778	0.207129	-1.14362	0.860894	0.252782	0.569529	Not Sig	nonsignificant	protein phosphatase 3 catalytic subunit beta [Source:RGD Symbol;Acc:3383]
Dgat2	chr1	118	143	78.7596	83.6741	4.91451	1.0624	0.607221	0.95266	NotSig	-0.0624837	negligible	27.8724	28.7804	26.9644	0.319011	-0.370987	0.936901	0.710648	0.870021	Not Sig	nonsignificant	diacylglycerol O-acyltransferase 2 [Source:RGD Symbol;Acc:620329]
Get3	chr19	103	101	67.4805	74.7635	7.28302	1.10793	0.607535	0.952663	NotSig	-0.0286044	negligible	25.5107	23.6277	27.3936	0.302168	0.67404	1.15938	0.500286	0.745059	Not Sig	nonsignificant	guided entry of tail-anchored proteins factor 3, ATPase [Source:RGD Symbol;Acc:1307906]
Arpc3	chr12	159	199	73.1973	75.9923	2.79498	1.03818	0.610536	0.953306	NotSig	-0.0572399	negligible	47.2516	47.7863	46.7169	0.23894	-0.0292339	0.977622	0.976678	0.98987	Not Sig	nonsignificant	actin related protein 2/3 complex, subunit 3 [Source:RGD Symbol;Acc:1311985]
MGC109340	chrX	120	153	90.5679	87.3609	-3.20695	0.964591	0.611347	0.953477	NotSig	0.0755114	negligible	26.7686	28.4911	25.046	0.312451	-0.70324	0.879081	0.481906	0.729122	Not Sig	nonsignificant
Csde1	chr2	199	180	81.8251	86.2518	4.42664	1.0541	0.611796	0.953865	NotSig	-0.0399213	negligible	38.7089	34.0179	43.4	0.246227	1.31041	1.2758	0.190058	0.49214	Not Sig	nonsignificant	cold shock domain containing E1 [Source:RGD Symbol;Acc:619726]
Prr7	chr17	190	213	83.6145	82.5639	-1.0506	0.987435	0.613229	0.953986	NotSig	0.0739206	negligible	50.9732	51.2581	50.6884	0.218945	0.069122	0.988886	0.944893	0.97475	Not Sig	nonsignificant	proline rich 7 (synaptic) [Source:RGD Symbol;Acc:1561898]
Crat	chr3	109	121	105.411	101.264	-4.14669	0.960662	0.612785	0.953986	NotSig	0.0900785	negligible	28.7632	27.2861	30.2402	0.280562	0.407082	1.10827	0.683948	0.85825	Not Sig	nonsignificant	carnitine O-acetyltransferase [Source:RGD Symbol;Acc:1303031]
Ctnnb1	chr8	385	441	98.2992	99.1893	0.890126	1.00906	0.612206	0.953986	NotSig	-0.055153	negligible	108.938	105.732	112.144	0.165018	0.480336	1.06064	0.630989	0.831826	Not Sig	nonsignificant	catenin beta 1 [Source:RGD Symbol;Acc:70487]
Plpp3	chr5	503	532	83.5284	85.4961	1.96765	1.02356	0.615201	0.954796	NotSig	0.0189723	negligible	96.6288	97.9869	95.2707	0.192092	-0.0467254	0.97228	0.962732	0.984008	Not Sig	nonsignificant	phospholipid phosphatase 3 [Source:RGD Symbol;Acc:620454]
Pdhb	chr15	101	128	95.1978	100.806	5.60812	1.05891	0.6162	0.955002	NotSig	-0.0270274	negligible	27.4916	28.8682	26.115	0.299705	-0.532492	0.904629	0.594386	0.814528	Not Sig	nonsignificant	pyruvate dehydrogenase E1 subunit beta [Source:RGD Symbol;Acc:1359146]
Rps12l2	chr1	119	103	52.4066	53.8095	1.40287	1.02677	0.623116	0.955706	NotSig	0.0439411	negligible	33.9772	26.1165	41.838	0.26706	2.56692	1.60198	0.0102607	0.11065	Not Sig	nonsignificant	ribosomal protein S12-like 2 [Source:RGD Symbol;Acc:2321899]
Aatk	chr10	214	281	97.9505	106.773	8.82291	1.09008	0.622339	0.955706	NotSig	-0.0375602	negligible	58.0946	63.4274	52.7619	0.207352	-1.25681	0.831847	0.208821	0.515027	Not Sig	nonsignificant	apoptosis-associated tyrosine kinase [Source:RGD Symbol;Acc:1590980]
Gltp	chr12	159	148	71.6776	73.837	2.1594	1.03013	0.621216	0.955706	NotSig	-0.00644069	negligible	36.1141	32.8994	39.3289	0.260148	0.883713	1.19543	0.376851	0.654202	Not Sig	nonsignificant	glycolipid transfer protein [Source:RGD Symbol;Acc:1564442]
Abhd4	chr15	177	178	72.9261	72.4051	-0.521019	0.992856	0.622818	0.955706	NotSig	0.0466546	negligible	40.443	39.1391	41.7469	0.239192	0.30167	1.06663	0.762904	0.896076	Not Sig	nonsignificant	abhydrolase domain containing 4, N-acyl phospholipase B [Source:RGD Symbol;Acc:1311858]
Dnaja2	chr19	130	177	99.4866	93.3685	-6.11817	0.938503	0.620045	0.955706	NotSig	0.136682	negligible	37.4927	41.5176	33.4678	0.250217	-1.07115	0.806112	0.2841	0.594255	Not Sig	nonsignificant	DnaJ heat shock protein family (Hsp40) member A2 [Source:RGD Symbol;Acc:71001]
Hspd1	chr9	195	221	85.5331	87.8276	2.29451	1.02683	0.624491	0.956889	NotSig	-0.0315747	negligible	54.2586	52.6746	55.8425	0.218515	0.363441	1.06014	0.716275	0.872517	Not Sig	nonsignificant	heat shock protein family D (Hsp60) member 1 [Source:RGD Symbol;Acc:621314]
Cd24	chr20	238	214	81.5365	87.5773	6.04082	1.07409	0.624857	0.957142	NotSig	-0.03514	negligible	45.0287	42.8068	47.2507	0.237355	0.774511	1.10381	0.438629	0.696704	Not Sig	nonsignificant	CD24 molecule [Source:RGD Symbol;Acc:2298]
Cct3	chr2	145	147	77.6464	80.9396	3.29319	1.04241	0.625093	0.957196	NotSig	-0.0114984	negligible	39.2081	35.7777	42.6386	0.262401	1.00233	1.19176	0.316185	0.613339	Not Sig	nonsignificant	chaperonin containing TCP1 subunit 3 [Source:RGD Symbol;Acc:735038]
Slc12a5	chr3	228	299	97.8039	98.4299	0.626001	1.0064	0.625208	0.957219	NotSig	0.0265368	negligible	55.3749	60.4761	50.2737	0.215625	-1.24426	0.831298	0.213402	0.521487	Not Sig	nonsignificant	solute carrier family 12 member 5 [Source:RGD Symbol;Acc:620811]
Cyb5a	chr18	140	106	72.9497	79.5544	6.60469	1.09054	0.625801	0.957243	NotSig	-0.101611	negligible	31.5194	25.298	37.7408	0.267998	2.0652	1.49185	0.0389037	0.203694	Not Sig	nonsignificant	cytochrome b5 type A [Source:RGD Symbol;Acc:620558]
LOC108351482	chr7	30	21	76.9794	72.8163	-4.16305	0.94592	0.625456	0.957243	NotSig	0.0226627	negligible	44.1142	38.5324	49.6961	0.230001	1.50675	1.28972	0.131874	0.396335	Not Sig	nonsignificant
Ddrgk1	chr3	200	198	71.7048	74.145	2.4402	1.03403	0.627055	0.957287	NotSig	-0.063595	negligible	49.6881	45.6639	53.7123	0.231711	0.903547	1.17625	0.366236	0.648705	Not Sig	nonsignificant	DDRGK domain containing 1 [Source:RGD Symbol;Acc:1309979]
Rpl37a-ps1	chr9	1965	1721	46.7936	47.6337	0.840109	1.01795	0.628018	0.957822	NotSig	-0.0166145	negligible	109.701	89.978	129.424	0.202891	2.6885	1.4384	0.00717734	0.0976305	Not Sig	nonsignificant	ribosomal protein L37A, pseudogene 1 [Source:RGD Symbol;Acc:40992504]
Sncg	chr16	239	224	76.0681	77.0037	0.935565	1.0123	0.629535	0.958587	NotSig	-0.032573	negligible	54.8459	46.2917	63.4001	0.228144	1.72235	1.36958	0.0850057	0.313054	Not Sig	nonsignificant	synuclein, gamma [Source:RGD Symbol;Acc:70996]
Adgrg1	chr19	192	208	76.8877	79.7154	2.82765	1.03678	0.63091	0.958858	NotSig	-0.0509511	negligible	42.1542	43.0694	41.239	0.246947	-0.123224	0.9575	0.901929	0.953092	Not Sig	nonsignificant	adhesion G protein-coupled receptor G1 [Source:RGD Symbol;Acc:628617]
Clptm1l	chr1	139	157	73.1907	76.7914	3.60072	1.0492	0.638744	0.95908	NotSig	-0.0587094	negligible	39.7286	37.4501	42.0072	0.26326	0.372679	1.12168	0.709387	0.870021	Not Sig	nonsignificant	CLPTM1-like [Source:RGD Symbol;Acc:1307896]
Ypel3	chr1	184	232	90.076	96.5835	6.5075	1.07224	0.637135	0.95908	NotSig	-0.0647418	negligible	53.9446	56.8506	51.0385	0.220224	-0.60642	0.897767	0.544236	0.78109	Not Sig	nonsignificant	yippee-like 3 [Source:RGD Symbol;Acc:1564579]
Ganab	chr1	155	188	74.1659	77.337	3.17108	1.04276	0.644663	0.95908	NotSig	-0.0507329	negligible	37.687	39.9542	35.4198	0.259935	-0.873541	0.88651	0.382368	0.65746	Not Sig	nonsignificant	glucosidase II alpha subunit [Source:RGD Symbol;Acc:1309775]
Guk1	chr10	392	335	88.7034	88.5738	-0.129606	0.998539	0.638242	0.95908	NotSig	0.0532616	negligible	97.4226	84.6691	110.176	0.194939	2.0209	1.30125	0.0432897	0.21453	Not Sig	nonsignificant	guanylate kinase 1 [Source:RGD Symbol;Acc:1309638]
Atp6v0a1	chr10	478	560	93.3003	99.5414	6.24112	1.06689	0.643354	0.95908	NotSig	-0.0561872	negligible	95.9026	102.128	89.6772	0.183904	-1.09306	0.878085	0.274366	0.585289	Not Sig	nonsignificant	ATPase H+ transporting V0 subunit a1 [Source:RGD Symbol;Acc:68405]
Rundc3a	chr10	330	347	85.7289	84.2047	-1.52424	0.98222	0.636515	0.95908	NotSig	0.0163508	negligible	83.5942	81.5195	85.6689	0.182409	0.41037	1.0509	0.681534	0.857597	Not Sig	nonsignificant	RUN domain containing 3A [Source:RGD Symbol;Acc:735057]
Baiap2	chr10	148	230	80.3609	89.4272	9.06628	1.11282	0.645826	0.95908	NotSig	0.0240241	negligible	38.9204	47.4141	30.4267	0.254066	-2.53418	0.641723	0.0112711	0.112221	Not Sig	nonsignificant	BAR/IMD domain containing adaptor protein 2 [Source:RGD Symbol;Acc:619814]
Ttc3	chr11	333	321	105.343	112.069	6.72538	1.06384	0.634592	0.95908	NotSig	0.0137342	negligible	77.341	76.244	78.4379	0.205543	0.328705	1.02877	0.742379	0.884796	Not Sig	nonsignificant	tetratricopeptide repeat domain 3 [Source:RGD Symbol;Acc:1308654]
Cct4	chr14	104	169	63.7931	65.8905	2.09746	1.03288	0.640305	0.95908	NotSig	0.0153283	negligible	36.3277	42.0774	30.5779	0.259472	-1.76061	0.726708	0.0783049	0.294972	Not Sig	nonsignificant	chaperonin containing TCP1 subunit 4 [Source:RGD Symbol;Acc:727937]
Jph4	chr15	268	352	66.9988	64.3634	-2.63541	0.960665	0.646603	0.95908	NotSig	-0.0068765	negligible	60.8437	69.914	51.7734	0.216254	-2.13536	0.74053	0.0327315	0.187278	Not Sig	nonsignificant	junctophilin 4 [Source:RGD Symbol;Acc:1303170]
Gas6	chr16	177	187	75.9038	82.3389	6.43505	1.08478	0.644829	0.95908	NotSig	-0.03701	negligible	46.0038	44.2393	47.7683	0.228538	0.548105	1.07977	0.58362	0.809981	Not Sig	nonsignificant	growth arrest specific 6 [Source:RGD Symbol;Acc:61913]
Amfr	chr19	414	427	86.6264	83.3155	-3.31095	0.961779	0.634658	0.95908	NotSig	0.0244465	negligible	90.7426	89.6085	91.8767	0.182845	0.0886212	1.02531	0.929383	0.96835	Not Sig	nonsignificant	autocrine motility factor receptor [Source:RGD Symbol;Acc:1311551]
Hexb	chr2	161	153	77.6067	77.7677	0.160955	1.00207	0.646746	0.95908	NotSig	-0.0320579	negligible	43.1935	39.1921	47.1949	0.23179	1.15381	1.20419	0.24858	0.568516	Not Sig	nonsignificant	hexosaminidase subunit beta [Source:RGD Symbol;Acc:1307607]
Ak5	chr2	101	142	111.616	110.367	-1.24879	0.988812	0.639414	0.95908	NotSig	-0.101825	negligible	27.9734	31.8151	24.1317	0.297675	-1.26259	0.7585	0.206737	0.513136	Not Sig	nonsignificant	adenylate kinase 5 [Source:RGD Symbol;Acc:1590818]
S100b	chr20	2944	2233	109.613	111.046	1.43306	1.01307	0.641062	0.95908	NotSig	-0.0269193	negligible	604.269	494.811	713.728	0.150783	3.56144	1.44243	0.000368828	0.0227444	FDR<0.05	nonsignificant	S100 calcium binding protein B [Source:RGD Symbol;Acc:3615]
Chn1	chr3	336	385	88.6307	90.0903	1.45959	1.01647	0.641994	0.95908	NotSig	-0.0142458	negligible	68.8626	70.2472	67.4779	0.242791	-0.295503	0.960578	0.767609	0.896076	Not Sig	nonsignificant	chimerin 1 [Source:RGD Symbol;Acc:620139]
Capza2	chr4	167	159	81.3988	86.2576	4.8588	1.05969	0.633979	0.95908	NotSig	-0.153294	negligible	33.1055	32.4889	33.722	0.275951	0.314916	1.03795	0.752826	0.889914	Not Sig	nonsignificant	capping actin protein of muscle Z-line subunit alpha 2 [Source:RGD Symbol;Acc:1549770]
Npy	chr4	122	127	95.4834	98.0734	2.59005	1.02713	0.642157	0.95908	NotSig	0.0278429	negligible	34.6303	33.7909	35.4697	0.267724	0.344617	1.04968	0.730382	0.878041	Not Sig	nonsignificant	neuropeptide Y [Source:RGD Symbol;Acc:3197]
Os9	chr7	169	175	82.2832	78.4234	-3.85979	0.953091	0.63942	0.95908	NotSig	0.0991103	negligible	42.3442	41.7725	42.9158	0.240795	0.195873	1.02737	0.844709	0.930411	Not Sig	nonsignificant	OS9, endoplasmic reticulum lectin [Source:RGD Symbol;Acc:1359574]
Ly6e	chr7	333	378	83.732	85.5273	1.79535	1.02144	0.637156	0.95908	NotSig	-0.0362175	negligible	87.8286	85.4613	90.1959	0.182817	0.322123	1.0554	0.747359	0.885389	Not Sig	nonsignificant	lymphocyte antigen 6 family member E [Source:RGD Symbol;Acc:1565342]
Tmem30a	chr8	234	243	87.2096	91.4583	4.24871	1.04872	0.640649	0.95908	NotSig	-0.0328727	negligible	32.9245	40.6149	25.2341	0.27071	-2.49412	0.621301	0.012627	0.114885	Not Sig	nonsignificant	transmembrane protein 30A [Source:RGD Symbol;Acc:1303315]
Ndufb3	chr9	220	211	58.3184	57.3522	-0.966211	0.983432	0.641975	0.95908	NotSig	0.0365073	negligible	36.8951	32.8279	40.9622	0.284488	0.984061	1.24778	0.325085	0.622555	Not Sig	nonsignificant	NADH:ubiquinone oxidoreductase subunit B3 [Source:RGD Symbol;Acc:1310737]
Myl12b	chr9	205	220	82.845	84.7546	1.90954	1.02305	0.64072	0.95908	NotSig	-0.0612616	negligible	53.9168	53.8533	53.9802	0.230443	0.122951	1.00236	0.902146	0.953092	Not Sig	nonsignificant	myosin light chain 12B [Source:RGD Symbol;Acc:628855]
Ids	chrX	359	411	90.6487	94.0391	3.39042	1.0374	0.635245	0.95908	NotSig	-0.0366958	negligible	30.7528	37.0104	24.4952	0.284039	-2.1598	0.661845	0.0307885	0.180503	Not Sig	nonsignificant	iduronate 2-sulfatase [Source:RGD Symbol;Acc:1560491]
Atp6ap1	chrX	442	516	98.8524	101.117	2.26443	1.02291	0.638526	0.95908	NotSig	-0.024775	negligible	101.152	105.498	96.8049	0.170067	-0.73958	0.917597	0.459555	0.710454	Not Sig	nonsignificant	ATPase H+ transporting accessory protein 1 [Source:RGD Symbol;Acc:620423]
Cpe	chr16	5074	4811	117.127	117.364	0.236703	1.00202	0.647918	0.959336	NotSig	0.0037451	negligible	1263.25	1135.5	1391	0.109778	2.65545	1.22501	0.00792037	0.103104	Not Sig	nonsignificant	carboxypeptidase E [Source:RGD Symbol;Acc:2394]
Sh3bgrl3	chr5	91	133	85.5811	86.5767	0.995574	1.01163	0.650225	0.959509	NotSig	-0.0698894	negligible	29.8079	31.458	28.1577	0.270209	-0.540011	0.895089	0.589189	0.812086	Not Sig	nonsignificant	SH3 domain binding glutamate-rich protein like 3 [Source:RGD Symbol;Acc:1308118]
Ndufs1	chr9	102	114	81.4494	84.0924	2.64296	1.03245	0.650108	0.959509	NotSig	-0.131853	negligible	25.8149	26.3845	25.2453	0.29495	-0.0179023	0.956824	0.985717	0.993474	Not Sig	nonsignificant	NADH:ubiquinone oxidoreductase core subunit S1 [Source:RGD Symbol;Acc:1359670]
Ndufa10	chr9	145	180	77.206	78.6717	1.46576	1.01899	0.651773	0.960305	NotSig	0.0261535	negligible	28.4587	28.8592	28.0581	0.287079	-0.295988	0.97224	0.767239	0.896076	Not Sig	nonsignificant	NADH:ubiquinone oxidoreductase subunit A10 [Source:RGD Symbol;Acc:727968]
Mprip	chr10	175	171	71.0128	70.1024	-0.910453	0.987179	0.652778	0.960354	NotSig	0.0890877	negligible	40.2827	36.5363	44.0291	0.245495	0.834683	1.20508	0.403896	0.67791	Not Sig	nonsignificant	myosin phosphatase Rho interacting protein [Source:RGD Symbol;Acc:619947]
Acsbg1	chr8	383	377	79.064	78.8057	-0.258293	0.996733	0.652868	0.960354	NotSig	-0.0121391	negligible	101.859	91.3522	112.366	0.16752	1.81216	1.23003	0.069961	0.278672	Not Sig	nonsignificant	acyl-CoA synthetase bubblegum family member 1 [Source:RGD Symbol;Acc:708557]
Selenow	chr1	2628	2135	98.4102	98.1618	-0.248348	0.997476	0.666423	0.961121	NotSig	0.0100704	negligible	650.076	538.18	761.973	0.159037	3.17859	1.41583	0.00147991	0.0417636	FDR<0.05	nonsignificant	selenoprotein W [Source:RGD Symbol;Acc:3661]
Crym	chr1	163	185	82.4528	84.9125	2.4597	1.02983	0.662675	0.961121	NotSig	-0.0466871	negligible	43.3161	41.1829	45.4493	0.258106	0.431746	1.1036	0.665926	0.849337	Not Sig	nonsignificant	crystallin, mu [Source:RGD Symbol;Acc:620943]
Polr2l	chr1	216	196	60.0582	62.7487	2.69049	1.0448	0.659388	0.961121	NotSig	-0.148073	negligible	54.13	44.8816	63.3784	0.222918	2.0292	1.41212	0.0424376	0.212188	Not Sig	nonsignificant
Ppp1ca	chr1	251	256	70.9645	72.4513	1.48676	1.02095	0.669915	0.961121	NotSig	-0.0248168	negligible	66.5151	59.6931	73.3371	0.207283	1.2604	1.22857	0.207525	0.513416	Not Sig	nonsignificant	protein phosphatase 1 catalytic subunit alpha [Source:RGD Symbol;Acc:3375]
Fam89b	chr1	103	111	72.5098	74.0105	1.50069	1.0207	0.664953	0.961121	NotSig	-0.025988	negligible	28.365	30.0128	26.7172	0.309897	-0.341494	0.890195	0.732732	0.878329	Not Sig	nonsignificant	family with sequence similarity 89, member B [Source:RGD Symbol;Acc:1311544]
Ndufb4	chr11	377	365	64.6281	66.4756	1.84743	1.02859	0.667339	0.961121	NotSig	-0.085881	negligible	90.3113	81.5649	99.0577	0.173234	1.6526	1.21446	0.0984131	0.339954	Not Sig	nonsignificant	NADH:ubiquinone oxidoreductase subunit B4 [Source:RGD Symbol;Acc:1307072]
Anapc5	chr12	228	230	75.4377	78.4858	3.04817	1.04041	0.669236	0.961121	NotSig	-0.0328252	negligible	63.3066	57.5596	69.0536	0.211125	1.17173	1.19969	0.241307	0.560739	Not Sig	nonsignificant	anaphase-promoting complex subunit 5 [Source:RGD Symbol;Acc:1306125]
Crmp1	chr14	113	150	85.8407	81.7699	-4.07082	0.952577	0.656597	0.961121	NotSig	0.0250122	negligible	32.4543	34.2179	30.6907	0.262697	-0.624768	0.896919	0.532123	0.772169	Not Sig	nonsignificant	collapsin response mediator protein 1 [Source:RGD Symbol;Acc:2407]
Camk2b	chr14	622	815	97.8987	97.4171	-0.48158	0.995081	0.666718	0.961121	NotSig	0.0298156	negligible	77.8098	95.3073	60.3122	0.22182	-3.08971	0.632817	0.00200349	0.049056	FDR<0.05	nonsignificant	calcium/calmodulin-dependent protein kinase II beta [Source:RGD Symbol;Acc:2262]
Ogdh	chr14	156	157	80.4547	86.0501	5.59531	1.06955	0.670129	0.961121	NotSig	-0.0150279	negligible	39.5795	40.7502	38.4088	0.261623	-0.15588	0.942542	0.876128	0.942538	Not Sig	nonsignificant	oxoglutarate dehydrogenase [Source:RGD Symbol;Acc:1561359]
Rnase4	chr15	114	137	87.9219	90.0751	2.15314	1.02449	0.663069	0.961121	NotSig	-0.0449749	negligible	29.7905	31.9592	27.6218	0.28275	-0.62566	0.864281	0.531538	0.772169	Not Sig	nonsignificant	ribonuclease A family member 4 [Source:RGD Symbol;Acc:61823]
Ntrk2	chr17	281	274	102.856	107.106	4.25018	1.04132	0.663403	0.961121	NotSig	-0.0275366	negligible	29.1907	30.4608	27.9206	0.308415	-0.386714	0.916608	0.698968	0.866015	Not Sig	nonsignificant	neurotrophic receptor tyrosine kinase 2 [Source:RGD Symbol;Acc:3213]
Prkaca	chr19	166	203	89.2671	94.7318	5.46469	1.06122	0.660285	0.961121	NotSig	-0.00540688	negligible	38.2225	41.1446	35.3003	0.248314	-0.824502	0.857957	0.409655	0.682359	Not Sig	nonsignificant	protein kinase cAMP-activated catalytic subunit alpha [Source:RGD Symbol;Acc:3389]
Ppdpf	chr3	162	181	80.355	83.6997	3.34468	1.04162	0.663008	0.961121	NotSig	0.00501427	negligible	44.612	42.218	47.0059	0.234147	0.570103	1.11341	0.568608	0.796443	Not Sig	nonsignificant	pancreatic progenitor cell differentiation and proliferation factor [Source:RGD Symbol;Acc:1310660]
Dpp6	chr4	292	367	83.5579	81.96	-1.59796	0.980876	0.666421	0.961121	NotSig	0.0674298	negligible	49.5227	55.9285	43.1168	0.248576	-1.53586	0.770928	0.124572	0.383387	Not Sig	nonsignificant	dipeptidyl peptidase like 6 [Source:RGD Symbol;Acc:68402]
Ndufa5	chr4	238	225	57.1606	59.5477	2.38714	1.04176	0.663011	0.961121	NotSig	-0.00270391	negligible	52.4375	46.2811	58.5938	0.224918	1.51632	1.26604	0.12944	0.39472	Not Sig	nonsignificant	NADH:ubiquinone oxidoreductase subunit A5 [Source:RGD Symbol;Acc:3155]
LOC100910678	chr4	79	76	59.9109	65.0097	5.09884	1.08511	0.666216	0.961121	NotSig	-0.042499	negligible	42.0545	35.4288	48.6802	0.259981	1.95206	1.37403	0.0509306	0.229809	Not Sig	nonsignificant	coiled-coil domain-containing protein 72-like [Source:RGD Symbol;Acc:6497475]
Dld	chr6	104	108	91.7581	95.5713	3.81324	1.04156	0.664739	0.961121	NotSig	0.0211767	negligible	27.0491	25.3076	28.7905	0.29129	0.705517	1.13762	0.480489	0.729122	Not Sig	nonsignificant	dihydrolipoamide dehydrogenase [Source:RGD Symbol;Acc:735073]
Kifc2	chr7	165	191	158.225	168.234	10.0094	1.06326	0.662206	0.961121	NotSig	-0.0564283	negligible	38.5656	40.9146	36.2166	0.248464	-0.669271	0.885176	0.503322	0.747021	Not Sig	nonsignificant	kinesin family member C2 [Source:RGD Symbol;Acc:735021]
Sult4a1	chr7	181	232	87.2389	88.9512	1.71234	1.01963	0.661791	0.961121	NotSig	0.0155436	negligible	44.0648	48.6071	39.5225	0.238729	-1.11442	0.8131	0.265101	0.577739	Not Sig	nonsignificant	sulfotransferase family 4A, member 1 [Source:RGD Symbol;Acc:69292]
Scap	chr8	135	173	60.9297	56.8032	-4.12647	0.932275	0.667616	0.961121	NotSig	0.0396088	negligible	42.2128	43.9801	40.4455	0.258699	-0.544863	0.919632	0.585848	0.809981	Not Sig	nonsignificant	SREBF chaperone [Source:RGD Symbol;Acc:1309378]
Igfbp2	chr9	199	212	81.6435	84.938	3.29447	1.04035	0.662965	0.961121	NotSig	-0.0813756	negligible	53.0245	49.5936	56.4555	0.215979	0.885703	1.13836	0.375778	0.653783	Not Sig	nonsignificant	insulin-like growth factor binding protein 2 [Source:RGD Symbol;Acc:2873]
Praf2	chrX	202	213	72.0724	70.9466	-1.12584	0.984379	0.65955	0.961121	NotSig	0.0722538	negligible	49.8529	48.6485	51.0574	0.229671	0.121045	1.04952	0.903655	0.953477	Not Sig	nonsignificant	PRA1 domain family, member 2 [Source:RGD Symbol;Acc:1566287]
Brsk1	chr1	296	419	83.5336	84.2014	0.667847	1.00799	0.673544	0.962667	NotSig	0.0248947	negligible	91.5426	101.291	81.7939	0.181423	-1.66907	0.807512	0.0951032	0.332502	Not Sig	nonsignificant	BR serine/threonine kinase 1 [Source:RGD Symbol;Acc:1563268]
Rps3	chr1	988	854	48.9379	50.1508	1.21286	1.02478	0.675371	0.962667	NotSig	-0.075328	negligible	244.558	209.253	279.863	0.173259	2.44332	1.33744	0.0145529	0.125547	Not Sig	nonsignificant	ribosomal protein S3 [Source:RGD Symbol;Acc:619888]
Sptbn2	chr1	868	820	93.1364	95.3499	2.21357	1.02377	0.678813	0.962667	NotSig	0.00201399	negligible	168.562	162.102	175.023	0.159415	0.581882	1.07971	0.560646	0.795124	Not Sig	nonsignificant	spectrin, beta, non-erythrocytic 2 [Source:RGD Symbol;Acc:3751]
Klhl5	chr14	261	230	83.5253	84.8154	1.29015	1.01545	0.674901	0.962667	NotSig	-0.0334165	negligible	58.3686	51.5693	65.1678	0.208094	1.5497	1.26369	0.121214	0.377278	Not Sig	nonsignificant	kelch-like family member 5 [Source:RGD Symbol;Acc:1309661]
Pnp	chr15	196	162	76.7124	73.5388	-3.17354	0.958631	0.677737	0.962667	NotSig	0.0424736	negligible	48.1021	39.7644	56.4398	0.224585	2.28029	1.41936	0.0225906	0.155468	Not Sig	nonsignificant	purine nucleoside phosphorylase [Source:RGD Symbol;Acc:1597189]
Itgb1	chr19	103	117	93.1175	88.5	-4.61744	0.950413	0.67814	0.962667	NotSig	0.0362179	negligible	27.0438	26.3215	27.7662	0.282107	0.26422	1.05488	0.79161	0.90338	Not Sig	nonsignificant	integrin subunit beta 1 [Source:RGD Symbol;Acc:2927]
Plekhm2	chr5	111	99	72.7177	72.503	-0.214744	0.997047	0.675506	0.962667	NotSig	0.0163827	negligible	25.5548	22.4701	28.6395	0.2879	1.15579	1.27456	0.247769	0.568516	Not Sig	nonsignificant	pleckstrin homology and RUN domain containing M2 [Source:RGD Symbol;Acc:1307005]
Pam	chr9	166	236	94.4714	97.5003	3.0289	1.03206	0.674319	0.962667	NotSig	-0.103906	negligible	49.8277	54.7731	44.8822	0.228385	-1.16861	0.819421	0.242562	0.561705	Not Sig	nonsignificant	peptidylglycine alpha-amidating monooxygenase [Source:RGD Symbol;Acc:3252]
Mag	chr1	852	820	81.5736	82.7195	1.14591	1.01405	0.680416	0.962731	NotSig	-0.0101926	negligible	208.218	185.446	230.989	0.164265	1.8531	1.24559	0.0638675	0.265185	Not Sig	nonsignificant	myelin-associated glycoprotein [Source:RGD Symbol;Acc:3035]
Nefl	chr15	289	508	79.6427	79.4688	-0.173814	0.997818	0.67947	0.962731	NotSig	-0.0726522	negligible	68.9078	81.6459	56.1698	0.204348	-2.63904	0.687968	0.00831405	0.103119	Not Sig	nonsignificant	neurofilament light chain [Source:RGD Symbol;Acc:621458]
Hk1	chr20	335	378	76.4269	79.9859	3.55906	1.04657	0.679502	0.962731	NotSig	-0.0799003	negligible	85.4631	88.0509	82.8753	0.183856	-0.402072	0.94122	0.687631	0.85825	Not Sig	nonsignificant	hexokinase 1 [Source:RGD Symbol;Acc:2796]
LOC102556004	chr5	129	116	79.7094	84.9733	5.26386	1.06604	0.681899	0.962731	NotSig	-0.0520909	negligible	33.036	29.4656	36.6064	0.274465	1.38382	1.24234	0.166412	0.451264	Not Sig	nonsignificant
Tmem63b	chr9	148	194	76.3796	78.1825	1.80292	1.0236	0.681332	0.962731	NotSig	-0.0111319	negligible	41.4513	42.1073	40.7954	0.234294	-0.151602	0.968844	0.879501	0.942724	Not Sig	nonsignificant	transmembrane protein 63B [Source:RGD Symbol;Acc:1305862]
Pdha1	chrX	207	240	85.1282	89.8814	4.75327	1.05584	0.679844	0.962731	NotSig	-0.0411869	negligible	41.9736	45.3415	38.6058	0.242864	-0.921437	0.851445	0.356822	0.641666	Not Sig	nonsignificant	pyruvate dehydrogenase E1 subunit alpha 1 [Source:RGD Symbol;Acc:3286]
Ndufa1	chrX	524	444	57.9546	59.8448	1.89016	1.03261	0.681637	0.962731	NotSig	-0.0676193	negligible	126.193	108	144.386	0.180564	2.51473	1.3369	0.0119124	0.112221	Not Sig	nonsignificant	NADH:ubiquinone oxidoreductase subunit A1 [Source:RGD Symbol;Acc:1560955]
S100a13	chr2	312	235	54.9292	55.9884	1.0592	1.01928	0.682875	0.963107	NotSig	0.01542	negligible	72.5046	56.6804	88.3288	0.213551	3.0937	1.55837	0.0019768	0.049056	FDR<0.05	nonsignificant
Fgfr1	chr16	199	193	85.2702	81.025	-4.24522	0.950214	0.68332	0.96337	NotSig	0.0549275	negligible	43.518	41.6808	45.3551	0.236106	0.742502	1.08815	0.457783	0.709692	Not Sig	nonsignificant	Fibroblast growth factor receptor 1 [Source:RGD Symbol;Acc:620713]
Rnf5	chr20	142	111	77.2097	79.84	2.63033	1.03407	0.683467	0.96337	NotSig	0.00709034	negligible	33.9385	28.2172	39.6598	0.260648	1.99375	1.40552	0.0461795	0.220524	Not Sig	nonsignificant	ring finger protein 5 [Source:RGD Symbol;Acc:1588458]
Creld1	chr4	106	101	98.4101	100.516	2.10639	1.0214	0.684555	0.963441	NotSig	-0.0212539	negligible	27.26	24.3302	30.1898	0.280799	1.1555	1.24084	0.247886	0.568516	Not Sig	nonsignificant	cysteine-rich with EGF-like domains 1 [Source:RGD Symbol;Acc:1309412]
Psd	chr1	851	1022	121.475	123.684	2.20933	1.01819	0.685658	0.963766	NotSig	0.00562121	negligible	215.626	220.142	211.11	0.1523	-0.393793	0.958972	0.693734	0.864041	Not Sig	nonsignificant	pleckstrin and Sec7 domain containing [Source:RGD Symbol;Acc:620297]
Atad1	chr1	109	147	78.0823	76.3353	-1.74695	0.977627	0.688288	0.964328	NotSig	0.094328	negligible	26.7395	30.6924	22.7866	0.28297	-1.55722	0.742418	0.119419	0.375079	Not Sig	nonsignificant	ATPase family, AAA domain containing 1 [Source:RGD Symbol;Acc:1308570]
Cops6	chr12	213	190	60.4509	63.0305	2.57951	1.04267	0.689389	0.964328	NotSig	-0.0580507	negligible	54.0778	47.0312	61.1244	0.225478	1.76277	1.29966	0.0779386	0.294258	Not Sig	nonsignificant	COP9 signalosome subunit 6 [Source:RGD Symbol;Acc:1309919]
Sort1	chr2	371	426	114.711	110.105	-4.60646	0.959843	0.690349	0.964328	NotSig	0.0234322	negligible	26.8774	32.0956	21.6592	0.325834	-1.87902	0.674836	0.0602413	0.25851	Not Sig	nonsignificant	sortilin 1 [Source:RGD Symbol;Acc:619999]
Syngap1	chr20	182	323	98.0542	91.5496	-6.50466	0.933663	0.688107	0.964328	NotSig	0.00793755	negligible	30.4489	38.9767	21.9212	0.310406	-2.69392	0.562418	0.00706172	0.0972217	Not Sig	nonsignificant	synaptic Ras GTPase activating protein 1 [Source:RGD Symbol;Acc:621090]
Emc4	chr3	175	207	94.5581	95.5432	0.985105	1.01042	0.688535	0.964328	NotSig	-0.0550611	negligible	28.5695	34.7723	22.3667	0.290378	-2.22163	0.643232	0.0263082	0.164674	Not Sig	nonsignificant	ER membrane protein complex subunit 4 [Source:RGD Symbol;Acc:1310905]
Fastk	chr4	114	156	84.3049	78.9212	-5.38366	0.936141	0.69321	0.964396	NotSig	0.0544821	negligible	36.769	35.7298	37.8081	0.259925	0.150094	1.05817	0.88069	0.94299	Not Sig	nonsignificant	Fas-activated serine/threonine kinase [Source:RGD Symbol;Acc:1311601]
P4hb	chr10	168	192	73.8253	70.9922	-2.83301	0.961625	0.693657	0.964572	NotSig	0.152116	negligible	44.3794	42.7486	46.0102	0.23819	0.455299	1.0763	0.648894	0.843853	Not Sig	nonsignificant	prolyl 4-hydroxylase subunit beta [Source:RGD Symbol;Acc:3244]
Gpc5	chr15	47	62	97.8665	98.2436	0.377111	1.00385	0.697589	0.964572	NotSig	-0.0472958	negligible	28.6322	29.8208	27.4436	0.288694	-0.583274	0.920283	0.559709	0.794846	Not Sig	nonsignificant	glypican 5 [Source:RGD Symbol;Acc:1308835]
Vps35	chr19	112	129	89.3725	94.2511	4.8786	1.05459	0.697235	0.964572	NotSig	-0.0289287	negligible	30.7364	29.8449	31.6279	0.300684	0.260226	1.05974	0.794689	0.905006	Not Sig	nonsignificant	VPS35 retromer complex component [Source:RGD Symbol;Acc:1589784]
Eif3m	chr3	107	110	58.7892	61.7284	2.93914	1.04999	0.697856	0.964572	NotSig	-0.0796273	negligible	28.2565	27.7225	28.7905	0.280801	0.169211	1.03853	0.865631	0.938941	Not Sig	nonsignificant	eukaryotic translation initiation factor 3, subunit M [Source:RGD Symbol;Acc:1565840]
Slc30a3	chr6	298	329	78.2763	76.6241	-1.65219	0.978893	0.698947	0.964764	NotSig	0.0778496	negligible	74.7242	77.8182	71.6302	0.201226	-0.522201	0.920481	0.60153	0.816815	Not Sig	nonsignificant	solute carrier family 30 member 3 [Source:RGD Symbol;Acc:1359689]
Tp53inp2	chr3	481	371	82.4578	81.5936	-0.864249	0.989519	0.699858	0.964923	NotSig	0.0105898	negligible	43.4433	41.1351	45.7514	0.23659	0.526264	1.11223	0.598705	0.816416	Not Sig	nonsignificant	tumor protein p53 inducible nuclear protein 2 [Source:RGD Symbol;Acc:735085]
Sez6	chr10	257	294	89.6419	91.9221	2.28014	1.02544	0.700334	0.964995	NotSig	-0.0210424	negligible	63.675	62.9701	64.3799	0.203282	0.0356456	1.02239	0.971565	0.98758	Not Sig	nonsignificant	seizure related 6 homolog [Source:RGD Symbol;Acc:619780]
Map3k10	chr1	144	306	70.3814	70.1428	-0.238601	0.99661	0.705674	0.965369	NotSig	0.0483349	negligible	43.564	55.8223	31.3057	0.253772	-3.36922	0.560809	0.000753816	0.0291409	FDR<0.05	nonsignificant	mitogen activated protein kinase kinase kinase 10 [Source:RGD Symbol;Acc:1308381]
Zmiz2	chr14	148	224	92.5631	96.2985	3.73541	1.04036	0.708144	0.965369	NotSig	0.00429257	negligible	41.3499	47.8751	34.8247	0.250836	-1.69588	0.727406	0.0899083	0.322624	Not Sig	nonsignificant	zinc finger, MIZ-type containing 2 [Source:RGD Symbol;Acc:1309256]
Tm2d2	chr16	118	117	70.5316	73.7545	3.22283	1.04569	0.707509	0.965369	NotSig	0.0659114	negligible	28.3199	25.1261	31.5137	0.285845	1.03816	1.25422	0.299197	0.606334	Not Sig	nonsignificant	TM2 domain containing 2 [Source:RGD Symbol;Acc:1306769]
Brd2	chr20	97	123	88.0856	89.1419	1.05628	1.01199	0.712071	0.965369	NotSig	-0.0438323	negligible	27.6206	28.7694	26.4718	0.285606	-0.37962	0.920136	0.704227	0.867821	Not Sig	nonsignificant	bromodomain containing 2 [Source:RGD Symbol;Acc:1303324]
RGD735065	chr20	122	143	66.6949	68.3406	1.64572	1.02468	0.712074	0.965369	NotSig	-0.104442	negligible	33.4162	33.4689	33.3634	0.265196	0.123791	0.996847	0.901481	0.953092	Not Sig	nonsignificant	similar to GI:13385412-like protein splice form I [Source:RGD Symbol;Acc:735065]
Gatd3a	chr20	132	142	75.1506	73.9001	-1.25049	0.98336	0.701159	0.965369	NotSig	0.0569753	negligible	33.5171	31.9946	35.0396	0.260667	0.607032	1.09517	0.54383	0.78109	Not Sig	nonsignificant	glutamine amidotransferase class 1 domain containing 3A [Source:RGD Symbol;Acc:1303003]
Gja1	chr20	731	770	86.4348	86.2139	-0.220879	0.997445	0.709259	0.965369	NotSig	0.0108286	negligible	62.8751	74.2173	51.533	0.216397	-2.51755	0.694353	0.0118174	0.112221	Not Sig	nonsignificant	gap junction protein, alpha 1 [Source:RGD Symbol;Acc:2690]
Gpr37	chr4	125	134	82.3926	87.0793	4.68665	1.05688	0.703223	0.965369	NotSig	-0.0321689	negligible	30.0807	28.7435	31.4179	0.290379	0.289422	1.09304	0.772258	0.896501	Not Sig	nonsignificant	G protein-coupled receptor 37 [Source:RGD Symbol;Acc:619848]
Suclg1	chr4	105	134	71.1538	69.5031	-1.65065	0.976802	0.706841	0.965369	NotSig	0.093764	negligible	29.6307	30.0928	29.1687	0.274274	-0.129479	0.969294	0.896979	0.953092	Not Sig	nonsignificant	succinate-CoA ligase GDP/ADP-forming subunit alpha [Source:RGD Symbol;Acc:619821]
Arl6ip5	chr4	258	313	83.8346	87.091	3.25641	1.03884	0.707362	0.965369	NotSig	0.00332187	negligible	67.8507	68.5457	67.1556	0.195554	-0.283247	0.97972	0.776988	0.896659	Not Sig	nonsignificant	ADP-ribosylation factor like GTPase 6 interacting protein 5 [Source:RGD Symbol;Acc:708572]
Ndufa6	chr7	353	350	73.9304	72.0982	-1.83217	0.975218	0.710301	0.965369	NotSig	0.0535298	negligible	91.0964	81.8952	100.298	0.176044	1.57661	1.22471	0.114885	0.372542	Not Sig	nonsignificant	NADH:ubiquinone oxidoreductase subunit A6 [Source:RGD Symbol;Acc:1309818]
Fgf13	chrX	249	291	76.2866	78.9736	2.68699	1.03522	0.702013	0.965369	NotSig	-0.0140262	negligible	56.935	61.5825	52.2875	0.213771	-1.0615	0.849064	0.288464	0.595896	Not Sig	nonsignificant	fibroblast growth factor 13 [Source:RGD Symbol;Acc:620164]
LOC103689966	chr1	77	78	72.5374	68.0374	-4.50003	0.937963	0.713727	0.966114	NotSig	0.0683818	negligible	53.3218	49.4516	57.1921	0.217555	1.02232	1.15653	0.306629	0.610691	Not Sig	nonsignificant	MARCKS-related protein-like [Source:RGD Symbol;Acc:9082300]
Epb41l2	chr1	160	131	84.9009	82.3485	-2.55239	0.969937	0.714229	0.966245	NotSig	0.0952895	negligible	34.6042	29.5221	39.6863	0.254794	1.56239	1.34429	0.118195	0.374908	Not Sig	nonsignificant	erythrocyte membrane protein band 4.1-like 2 [Source:RGD Symbol;Acc:1563977]
Arhgdig	chr10	178	193	75.4762	72.8997	-2.57646	0.965864	0.71522	0.966695	NotSig	0.0199897	negligible	48.8317	47.6086	50.0548	0.233896	0.296234	1.05138	0.767051	0.896076	Not Sig	nonsignificant	Rho GDP dissociation inhibitor gamma [Source:RGD Symbol;Acc:1310739]
Rn18s	chrUn_NW_023637849v1	1032	682	46.1584	47.0835	0.925109	1.02004	0.715593	0.966695	NotSig	-0.00692262	negligible	303.877	238.051	369.703	0.515701	1.23626	1.55304	0.21636	0.525898	Not Sig	nonsignificant	18S ribosomal RNA [Source:RGD Symbol;Acc:5687330]
Ncoa4	chr16	121	122	67.4652	63.97	-3.4952	0.948193	0.715738	0.966695	NotSig	-0.0197123	negligible	29.9382	31.1157	28.7607	0.287995	-0.314573	0.924312	0.753086	0.889914	Not Sig	nonsignificant	nuclear receptor coactivator 4 [Source:RGD Symbol;Acc:1563014]
Ufc1	chr13	112	99	71.6648	75.8763	4.21152	1.05877	0.717703	0.968676	NotSig	-0.0230134	negligible	26.7718	23.896	29.6477	0.293134	0.919824	1.24069	0.357664	0.641666	Not Sig	nonsignificant	ubiquitin-fold modifier conjugating enzyme 1 [Source:RGD Symbol;Acc:1303313]
Svop	chr12	159	220	96.011	91.8888	-4.12222	0.957065	0.71805	0.968809	NotSig	0.0792555	negligible	28.4046	34.3699	22.4394	0.296461	-2.02975	0.65288	0.0423817	0.212188	Not Sig	nonsignificant	SV2 related protein [Source:RGD Symbol;Acc:620277]
Ctxn1	chr12	489	467	98.0114	100.349	2.33772	1.02385	0.718195	0.968856	NotSig	-0.012231	negligible	111.707	104.882	118.533	0.16719	1.01385	1.13016	0.310654	0.611536	Not Sig	nonsignificant
Selenos	chr1	91	114	84.0175	82.7486	-1.2689	0.984897	0.718699	0.969039	NotSig	-0.0192169	negligible	26.9055	27.9165	25.8946	0.283533	-0.383919	0.927574	0.701039	0.866015	Not Sig	nonsignificant	selenoprotein S [Source:RGD Symbol;Acc:628897]
Rpl31	chr9	998	882	54.0143	53.532	-0.482363	0.99107	0.718684	0.969039	NotSig	0.00928766	negligible	116.959	99.8388	134.08	0.178913	2.4782	1.34296	0.0132047	0.117124	Not Sig	nonsignificant	ribosomal protein L31 [Source:RGD Symbol;Acc:621202]
Coro1b	chr1	94	102	77.8277	81.9867	4.15903	1.05344	0.720391	0.969346	NotSig	0.0104387	negligible	25.3319	22.8221	27.8416	0.307937	0.791595	1.21994	0.428597	0.693909	Not Sig	nonsignificant	coronin 1B [Source:RGD Symbol;Acc:2382]
Srrm2	chr10	129	183	117.897	119.938	2.04141	1.01732	0.720741	0.969405	NotSig	-0.0257895	negligible	36.6691	38.9627	34.3755	0.25298	-0.489851	0.882269	0.624239	0.830334	Not Sig	nonsignificant	serine/arginine repetitive matrix 2 [Source:RGD Symbol;Acc:1310163]
Rap1a	chr2	109	106	67.6775	71.2245	3.54702	1.05241	0.722402	0.969448	NotSig	-0.0424554	negligible	28.9516	25.7335	32.1697	0.282881	1.15931	1.25011	0.24633	0.56806	Not Sig	nonsignificant	RAP1A, member of RAS oncogene family [Source:RGD Symbol;Acc:1359694]
Cep170b	chr6	145	232	69.5002	67.1685	-2.33168	0.966451	0.721436	0.969448	NotSig	0.0872016	negligible	27.7398	34.343	21.1367	0.29394	-2.58261	0.615459	0.00980552	0.108841	Not Sig	nonsignificant	centrosomal protein 170B [Source:RGD Symbol;Acc:1595689]
Mal	chr3	575	712	85.0079	86.5034	1.49552	1.01759	0.724309	0.969578	NotSig	-0.0148965	negligible	116.195	129.324	103.067	0.173447	-1.85898	0.796969	0.0630303	0.264375	Not Sig	nonsignificant	mal, T-cell differentiation protein [Source:RGD Symbol;Acc:3037]
Epb41l1	chr3	366	459	97.6845	100.666	2.98113	1.03052	0.723838	0.969578	NotSig	-0.03828	negligible	45.3288	53.52	37.1375	0.258715	-2.20164	0.6939	0.0276906	0.169503	Not Sig	nonsignificant	erythrocyte membrane protein band 4.1-like 1 [Source:RGD Symbol;Acc:71087]
Eif4g1	chr11	240	317	76.087	76.3188	0.231747	1.00305	0.725457	0.969585	NotSig	0.0111486	negligible	45.5407	49.3837	41.6976	0.248534	-1.03027	0.844359	0.302884	0.609061	Not Sig	nonsignificant	eukaryotic translation initiation factor 4 gamma 1 [Source:RGD Symbol;Acc:1306144]
Mast3	chr16	171	227	101.121	100.497	-0.624488	0.993824	0.725095	0.969585	NotSig	0.0801004	negligible	37.1713	41.6727	32.67	0.252571	-1.40705	0.783967	0.159413	0.43799	Not Sig	nonsignificant	microtubule associated serine/threonine kinase 3 [Source:RGD Symbol;Acc:1587639]
Abat	chr10	241	258	112.163	112.758	0.594194	1.0053	0.728596	0.969836	NotSig	-0.0554284	negligible	31.79	31.7978	31.7822	0.283465	-0.0629922	0.999509	0.949773	0.978572	Not Sig	nonsignificant	4-aminobutyrate aminotransferase [Source:RGD Symbol;Acc:620948]
Grn	chr10	98	93	78.3239	76.4109	-1.91304	0.975575	0.726619	0.969836	NotSig	0.0773312	negligible	25.3208	22.5745	28.0671	0.322021	0.869239	1.24331	0.384716	0.658328	Not Sig	nonsignificant	granulin precursor [Source:RGD Symbol;Acc:61983]
Adgrb1	chr7	450	457	71.8685	75.6373	3.76887	1.05244	0.726458	0.969836	NotSig	0.00459977	negligible	109.319	103.305	115.333	0.169342	0.884172	1.11643	0.376603	0.654202	Not Sig	nonsignificant	adhesion G protein-coupled receptor B1 [Source:RGD Symbol;Acc:1305608]
Adap1	chr12	158	215	88.3209	97.1145	8.79354	1.09956	0.730077	0.969837	NotSig	-0.0361184	negligible	36.5913	38.6505	34.5322	0.267549	-0.574289	0.893447	0.565772	0.796443	Not Sig	nonsignificant	ArfGAP with dual PH domains 1 [Source:RGD Symbol;Acc:621418]
Tmem176b	chr4	193	183	63.0916	66.595	3.50335	1.05553	0.730374	0.969837	NotSig	-0.0609227	negligible	52.6444	43.891	61.3978	0.230923	2.00711	1.39887	0.0447375	0.217899	Not Sig	nonsignificant	transmembrane protein 176B [Source:RGD Symbol;Acc:708403]
Dync1h1	chr6	310	289	103.417	106.56	3.14283	1.03039	0.729979	0.969837	NotSig	-0.0699237	negligible	77.69	71.3219	84.0582	0.190364	1.23318	1.17857	0.217508	0.527435	Not Sig	nonsignificant	dynein cytoplasmic 1 heavy chain 1 [Source:RGD Symbol;Acc:2511]
Ptprn	chr9	389	466	88.416	90.3547	1.93865	1.02193	0.73032	0.969837	NotSig	-0.00628272	negligible	107.38	107.085	107.676	0.170389	-0.0318832	1.00552	0.974565	0.988818	Not Sig	nonsignificant	protein tyrosine phosphatase, receptor type, N [Source:RGD Symbol;Acc:620777]
Trim28	chr1	94	123	87.7687	86.3776	-1.39115	0.98415	0.731915	0.970159	NotSig	0.0758486	negligible	28.8431	28.932	28.7542	0.282823	-0.174051	0.993856	0.861825	0.938941	Not Sig	nonsignificant	tripartite motif-containing 28 [Source:RGD Symbol;Acc:620289]
Thrsp	chr1	129	101	74.5248	73.1288	-1.39604	0.981267	0.732001	0.970159	NotSig	0.0907051	negligible	29.3411	24.7648	33.9173	0.275505	1.77881	1.36958	0.0752711	0.288771	Not Sig	nonsignificant	thyroid hormone responsive [Source:RGD Symbol;Acc:3859]
Tmem9	chr13	97	138	70.5612	73.5531	2.99182	1.0424	0.730834	0.970159	NotSig	-0.0624144	negligible	28.7879	31.3899	26.1859	0.278088	-1.0055	0.834212	0.314655	0.613339	Not Sig	nonsignificant	transmembrane protein 9 [Source:RGD Symbol;Acc:1307922]
Hadha	chr6	133	147	87.4723	91.6623	4.18997	1.0479	0.731679	0.970159	NotSig	-0.0825695	negligible	34.9809	32.2775	37.6842	0.257756	0.764536	1.16751	0.444548	0.698648	Not Sig	nonsignificant	hydroxyacyl-CoA dehydrogenase trifunctional multienzyme complex subunit alpha [Source:RGD Symbol;Acc:620512]
Slc48a1	chr7	347	345	80.3912	83.1531	2.7619	1.03436	0.731554	0.970159	NotSig	-0.0249758	negligible	75.4094	73.3348	77.484	0.184188	0.475142	1.05658	0.634686	0.8334	Not Sig	nonsignificant	solute carrier family 48 member 1 [Source:RGD Symbol;Acc:1562880]
Dnajb2	chr9	123	127	80.1341	85.1138	4.97978	1.06214	0.73101	0.970159	NotSig	0.028228	negligible	29.0798	28.4181	29.7415	0.273545	0.236606	1.04657	0.812963	0.915169	Not Sig	nonsignificant	DnaJ heat shock protein family (Hsp40) member B2 [Source:RGD Symbol;Acc:1591035]
Rpl22l1	chr2	264	246	50.5981	49.2209	-1.3772	0.972782	0.732218	0.970177	NotSig	0.00875177	negligible	67.3474	57.4667	77.2281	0.213274	2.05059	1.34388	0.0403064	0.209066	Not Sig	nonsignificant	ribosomal protein L22 like 1 [Source:RGD Symbol;Acc:1309517]
Atp2a2	chr12	718	812	93.2449	93.8788	0.633893	1.0068	0.732531	0.970455	NotSig	-0.00220653	negligible	167.914	165.296	170.532	0.164362	0.0976794	1.03168	0.922187	0.964473	Not Sig	nonsignificant	ATPase sarcoplasmic/endoplasmic reticulum Ca2+ transporting 2 [Source:RGD Symbol;Acc:2174]
Gtf2h5	chr1	125	98	70.048	69.1691	-0.878936	0.987452	0.733969	0.970614	NotSig	0.0471164	negligible	28.172	22.5659	33.7781	0.286042	2.13578	1.49687	0.032697	0.187278	Not Sig	nonsignificant	general transcription factor IIH subunit 5 [Source:RGD Symbol;Acc:1560991]
Dhrs7	chr6	103	86	63.9368	66.0544	2.11764	1.03312	0.733495	0.970614	NotSig	0.0276342	negligible	25.8604	21.194	30.5269	0.300835	1.68868	1.44036	0.09128	0.325826	Not Sig	nonsignificant	dehydrogenase/reductase 7 [Source:RGD Symbol;Acc:1565002]
Cd59	chr3	188	184	88.135	89.0058	0.870797	1.00988	0.734613	0.970818	NotSig	0.0113392	negligible	33.5978	31.3412	35.8545	0.286784	0.527217	1.14401	0.598043	0.816221	Not Sig	nonsignificant	CD59 molecule [Source:RGD Symbol;Acc:2311]
Ddr1	chr20	159	155	77.5213	75.3985	-2.12284	0.972616	0.736162	0.971615	NotSig	0.023572	negligible	36.7629	34.827	38.6988	0.259124	0.737511	1.11117	0.460812	0.711076	Not Sig	nonsignificant	discoidin domain receptor tyrosine kinase 1 [Source:RGD Symbol;Acc:2252]
Caly	chr1	595	642	80.587	82.101	1.51404	1.01879	0.737139	0.972096	NotSig	-0.0321427	negligible	158.602	154.422	162.783	0.145673	0.513993	1.05415	0.607257	0.819354	Not Sig	nonsignificant	calcyon neuron-specific vesicular protein [Source:RGD Symbol;Acc:621719]
Basp1	chr2	353	430	73.2206	78.4797	5.25907	1.07182	0.73713	0.972096	NotSig	-0.0189963	negligible	69.9456	70.9812	68.91	0.232329	-0.275933	0.970819	0.782599	0.897805	Not Sig	nonsignificant	brain abundant, membrane attached signal protein 1 [Source:RGD Symbol;Acc:621491]
Arhgef4	chr9	144	159	99.5506	96.0842	-3.46638	0.96518	0.737255	0.972114	NotSig	0.0564531	negligible	33.7467	36.0071	31.4863	0.265778	-0.519982	0.874447	0.603076	0.816815	Not Sig	nonsignificant	Rho guanine nucleotide exchange factor 4 [Source:RGD Symbol;Acc:1586179]
Fuca1	chr5	120	91	62.2173	63.9309	1.71351	1.02754	0.737846	0.972447	NotSig	-0.0556631	negligible	28.9872	22.5366	35.4378	0.279311	2.34787	1.57246	0.018881	0.143547	Not Sig	nonsignificant	alpha-L-fucosidase 1 [Source:RGD Symbol;Acc:2636]
C1qtnf4	chr3	442	479	82.5769	83.9073	1.33042	1.01611	0.740356	0.9727	NotSig	0.0168098	negligible	107.974	107.879	108.068	0.182253	0.056078	1.00174	0.95528	0.980605	Not Sig	nonsignificant	C1q and TNF related 4 [Source:RGD Symbol;Acc:1311006]
LOC108351058	chr5	190	138	48.7479	48.3814	-0.366502	0.992482	0.740296	0.9727	NotSig	0.0694481	negligible	56.2194	48.0788	64.3601	0.257018	1.57968	1.33864	0.11418	0.372033	Not Sig	nonsignificant
Kcnip2	chr1	162	161	96.9463	95.1486	-1.79778	0.981456	0.742225	0.972831	NotSig	0.0586775	negligible	35.7633	37.1648	34.3617	0.274817	-0.195622	0.924575	0.844906	0.930411	Not Sig	nonsignificant	potassium voltage-gated channel interacting protein 2 [Source:RGD Symbol;Acc:70887]
Ccng1	chr10	155	144	70.9958	73.4972	2.50136	1.03523	0.743419	0.972831	NotSig	0.0459803	negligible	27.89	27.9169	27.8631	0.288421	-0.0404137	0.998072	0.967763	0.985162	Not Sig	nonsignificant	cyclin G1 [Source:RGD Symbol;Acc:2295]
Syp	chrX	1500	1821	96.9432	96.5535	-0.389725	0.99598	0.744393	0.973079	NotSig	0.0200532	negligible	292.192	308.09	276.294	0.151129	-1.08384	0.896796	0.278438	0.589536	Not Sig	nonsignificant	synaptophysin [Source:RGD Symbol;Acc:3802]
Rpl18	chr1	521	474	57.8588	57.7392	-0.119645	0.997932	0.750254	0.973221	NotSig	-0.0106344	negligible	123.757	110.23	137.283	0.173371	1.84476	1.24543	0.0650727	0.269205	Not Sig	nonsignificant	ribosomal protein L18 [Source:RGD Symbol;Acc:621182]
Sh3gl3	chr1	139	129	73.1394	77.0762	3.93682	1.05383	0.756595	0.973221	NotSig	-0.0338762	negligible	34.3991	31.1906	37.6076	0.256898	1.09657	1.20574	0.27283	0.585055	Not Sig	nonsignificant	SH3 domain containing GRB2 like 3, endophilin A3 [Source:RGD Symbol;Acc:620578]
Ilk	chr1	128	132	95.509	96.4793	0.97037	1.01016	0.758971	0.973221	NotSig	-0.00781541	negligible	35.3269	33.6877	36.9662	0.248076	0.563019	1.09732	0.573422	0.800291	Not Sig	nonsignificant	integrin-linked kinase [Source:RGD Symbol;Acc:620063]
Ndufv1	chr1	180	212	73.9919	74.6968	0.704887	1.00953	0.754887	0.973221	NotSig	0.0137787	negligible	52.1776	52.4988	51.8565	0.216601	-0.0980065	0.987764	0.921927	0.964473	Not Sig	nonsignificant	NADH:ubiquinone oxidoreductase core subunit V1 [Source:RGD Symbol;Acc:1359247]
Flywch1	chr10	87	133	84.8851	83.7298	-1.15524	0.986391	0.757544	0.973221	NotSig	0.0220314	negligible	25.5889	28.9716	22.2062	0.301614	-1.36044	0.766481	0.173691	0.464944	Not Sig	nonsignificant	FLYWCH-type zinc finger 1 [Source:RGD Symbol;Acc:1309385]
Hnrnpab	chr10	137	152	60.742	62.0258	1.28384	1.02114	0.749497	0.973221	NotSig	-0.0531822	negligible	37.9822	38.6636	37.3008	0.267493	0.00463058	0.964752	0.996305	0.998705	Not Sig	nonsignificant	heterogeneous nuclear ribonucleoprotein A/B [Source:RGD Symbol;Acc:69255]
Mink1	chr10	239	230	90.9612	92.7899	1.82865	1.0201	0.751825	0.973221	NotSig	-0.0127555	negligible	62.7475	59.2774	66.2176	0.207601	0.901834	1.11708	0.367145	0.649624	Not Sig	nonsignificant	misshapen-like kinase 1 [Source:RGD Symbol;Acc:1359135]
Cldnd1	chr11	107	125	77.5156	81.4353	3.91974	1.05057	0.756514	0.973221	NotSig	-0.00820924	negligible	26.4588	24.763	28.1546	0.303516	0.36053	1.13696	0.718451	0.872517	Not Sig	nonsignificant	claudin domain containing 1 [Source:RGD Symbol;Acc:1359273]
Arf4	chr16	117	111	71.3571	70.8115	-0.545582	0.992354	0.757044	0.973221	NotSig	0.0112042	negligible	29.2407	23.9453	34.5361	0.280307	1.7145	1.44229	0.0864364	0.315607	Not Sig	nonsignificant	ADP-ribosylation factor 4 [Source:RGD Symbol;Acc:621275]
Sin3b	chr16	111	141	83.5513	92.5191	8.96775	1.10733	0.759965	0.973221	NotSig	0.0156094	negligible	31.3501	34.186	28.5142	0.28411	-0.829285	0.83409	0.406943	0.68097	Not Sig	nonsignificant	SIN3 transcription regulator family member B [Source:RGD Symbol;Acc:1587989]
Cisd1	chr20	126	159	70.2451	70.1793	-0.0658083	0.999063	0.760638	0.973221	NotSig	-0.00176448	negligible	36.1371	36.4648	35.8093	0.259961	-0.0723031	0.982025	0.942361	0.97405	Not Sig	nonsignificant	CDGSH iron sulfur domain 1 [Source:RGD Symbol;Acc:1309529]
Fyn	chr20	248	252	78.8334	77.0494	-1.78402	0.97737	0.754317	0.973221	NotSig	0.00348133	negligible	46.8321	45.4096	48.2547	0.242637	0.237332	1.06265	0.812399	0.915169	Not Sig	nonsignificant	FYN proto-oncogene, Src family tyrosine kinase [Source:RGD Symbol;Acc:2641]
Prnp	chr3	939	1149	93.2752	94.0993	0.824082	1.00883	0.759664	0.973221	NotSig	0.0261836	negligible	184.569	210.696	158.441	0.175478	-2.26419	0.751986	0.0235624	0.155468	Not Sig	nonsignificant	prion protein [Source:RGD Symbol;Acc:3410]
B4galt2	chr5	105	136	76.0894	72.5907	-3.49872	0.954018	0.754222	0.973221	NotSig	-0.0214757	negligible	28.5325	31.8689	25.1961	0.284061	-1.1718	0.790616	0.241276	0.560739	Not Sig	nonsignificant	beta-1,4-galactosyltransferase 2 [Source:RGD Symbol;Acc:1305358]
Tspan13	chr6	272	350	85.5028	83.053	-2.44977	0.971349	0.760554	0.973221	NotSig	0.0231688	negligible	45.0344	48.0005	42.0684	0.260336	-0.804372	0.876416	0.421182	0.687518	Not Sig	nonsignificant	tetraspanin 13 [Source:RGD Symbol;Acc:1311788]
Eif5	chr6	160	187	85.9296	89.3348	3.40524	1.03963	0.757586	0.973221	NotSig	-0.012716	negligible	30.0931	33.758	26.4281	0.2709	-1.34106	0.782868	0.179902	0.476183	Not Sig	nonsignificant	eukaryotic translation initiation factor 5 [Source:RGD Symbol;Acc:619861]
Ndufs7	chr7	226	200	76.7814	78.0106	1.22925	1.01601	0.753044	0.973221	NotSig	-0.0176008	negligible	53.0332	45.2822	60.7842	0.226632	1.87512	1.34234	0.060776	0.258803	Not Sig	nonsignificant	NADH:ubiquinone oxidoreductase core subunit S7 [Source:RGD Symbol;Acc:1310013]
R3hdm4	chr7	327	363	97.0588	100.54	3.48134	1.03587	0.758148	0.973221	NotSig	-0.0132993	negligible	76.1747	77.4593	74.8901	0.201993	-0.230002	0.966833	0.81809	0.91738	Not Sig	nonsignificant	R3H domain containing 4 [Source:RGD Symbol;Acc:1307067]
Nap1l1	chr7	134	164	75.0703	77.7925	2.72222	1.03626	0.75131	0.973221	NotSig	0.0399776	negligible	36.1612	37.8396	34.4827	0.254685	-0.631192	0.911285	0.527915	0.769852	Not Sig	nonsignificant	nucleosome assembly protein 1-like 1 [Source:RGD Symbol;Acc:71094]
Zc3h7b	chr7	245	335	66.0772	67.6092	1.532	1.02318	0.750442	0.973221	NotSig	-0.0213827	negligible	29.14	36.0198	22.2603	0.291319	-2.31118	0.618002	0.0208231	0.151731	Not Sig	nonsignificant	zinc finger CCCH-type containing 7B [Source:RGD Symbol;Acc:1307064]
Copz1	chr7	99	135	84.6395	86.6096	1.9701	1.02328	0.753722	0.973221	NotSig	0.0123592	negligible	26.2511	27.9819	24.5202	0.284366	-0.764959	0.876289	0.444296	0.698648	Not Sig	nonsignificant	COPI coat complex subunit zeta 1 [Source:RGD Symbol;Acc:1306154]
Oaf	chr8	126	134	56.844	55.6843	-1.15977	0.979597	0.748851	0.973221	NotSig	0.0268109	negligible	34.6485	33.2983	35.9988	0.288703	0.438866	1.0811	0.660759	0.846472	Not Sig	nonsignificant	out at first homolog [Source:RGD Symbol;Acc:1305890]
Higd1a	chr8	150	147	73.7707	75.2132	1.44258	1.01955	0.744652	0.973221	NotSig	-0.0777116	negligible	25.4535	23.2862	27.6208	0.288645	0.763917	1.18614	0.444917	0.698648	Not Sig	nonsignificant	HIG1 hypoxia inducible domain family, member 1A [Source:RGD Symbol;Acc:620215]
Cops9	chr9	410	375	73.0986	75.555	2.45637	1.0336	0.746093	0.973221	NotSig	-0.00137121	negligible	100.164	83.9986	116.33	0.180595	2.40245	1.3849	0.0162857	0.132272	Not Sig	nonsignificant	COP9 signalosome subunit 9 [Source:RGD Symbol;Acc:1596701]
LOC100360413	chrX	985	782	55.332	56.0337	0.701758	1.01268	0.754932	0.973221	NotSig	-0.0281422	negligible	235.988	242.467	229.508	0.136327	-0.658414	0.946555	0.510272	0.753343	Not Sig	nonsignificant	eukaryotic translation elongation factor 1 alpha 1-like [Source:RGD Symbol;Acc:2322143]
Cldn10	chr15	124	108	83.4744	82.2672	-1.20718	0.985538	0.75294	0.973221	NotSig	0.0389603	negligible	31.1078	25.111	37.1046	0.295718	1.73628	1.47762	0.0825145	0.305984	Not Sig	nonsignificant	claudin 10 [Source:RGD Symbol;Acc:1308027]
Tprg1l	chr5	247	230	79.5659	79.908	0.342126	1.0043	0.762542	0.973291	NotSig	-0.0227239	negligible	59.2051	53.1276	65.2826	0.218899	1.43493	1.22879	0.151307	0.426888	Not Sig	nonsignificant	tumor protein p63 regulated 1-like [Source:RGD Symbol;Acc:1590079]
Mapre3	chr6	145	189	99.1782	103.188	4.00949	1.04043	0.764522	0.974406	NotSig	-0.0669551	negligible	38.5887	42.1517	35.0256	0.284079	-0.853708	0.830941	0.393267	0.666215	Not Sig	nonsignificant	microtubule-associated protein, RP/EB family, member 3 [Source:RGD Symbol;Acc:1359297]
Kcnmb4	chr7	167	189	69.445	68.447	-0.99806	0.985628	0.765508	0.974406	NotSig	0.024891	negligible	45.3807	45.4941	45.2674	0.245602	0.0446214	0.995018	0.964409	0.984513	Not Sig	nonsignificant	potassium calcium-activated channel subfamily M regulatory beta subunit 4 [Source:RGD Symbol;Acc:620728]
Rbx1	chr7	164	190	73.0525	71.8804	-1.17211	0.983955	0.765785	0.974406	NotSig	0.0165558	negligible	40.5338	39.0298	42.0377	0.248987	0.504705	1.07707	0.613766	0.822802	Not Sig	nonsignificant	ring-box 1 [Source:RGD Symbol;Acc:1308453]
Pja1	chrX	136	204	83.7351	80.9487	-2.78638	0.966724	0.765781	0.974406	NotSig	0.053149	negligible	27.4031	33.3779	21.4283	0.285487	-2.22565	0.641992	0.0260379	0.163597	Not Sig	nonsignificant	praja ring finger ubiquitin ligase 1 [Source:RGD Symbol;Acc:1591532]
Marcksl1	chr5	602	477	71.0657	73.1815	2.11582	1.02977	0.76869	0.974944	NotSig	-0.0646478	negligible	85.0484	72.3353	97.7615	0.192624	2.37903	1.35151	0.0173585	0.138165	Not Sig	nonsignificant	MARCKS-like 1 [Source:RGD Symbol;Acc:621197]
Ensa	chr2	190	208	81.447	88.1385	6.69141	1.08216	0.77043	0.976214	NotSig	-0.0179069	negligible	42.2782	40.7909	43.7656	0.252956	0.305044	1.07293	0.760333	0.894227	Not Sig	nonsignificant	endosulfine alpha [Source:RGD Symbol;Acc:62007]
Asrgl1	chr1	324	291	72.9325	73.2528	0.320275	1.00439	0.772849	0.976219	NotSig	-0.0513018	negligible	55.3705	44.7371	66.0038	0.212897	2.48719	1.47537	0.0128757	0.115881	Not Sig	nonsignificant	asparaginase and isoaspartyl peptidase 1 [Source:RGD Symbol;Acc:708526]
Ndufb7	chr19	226	178	60.1338	61.451	1.31723	1.0219	0.775025	0.976219	NotSig	0.00744313	negligible	50.436	40.322	60.55	0.247907	2.26834	1.50166	0.0233086	0.155468	Not Sig	nonsignificant	NADH:ubiquinone oxidoreductase subunit B7 [Source:RGD Symbol;Acc:1308550]
Psmc3	chr3	115	159	70.7535	68.5365	-2.21702	0.968666	0.775028	0.976219	NotSig	0.0322455	negligible	35.7937	37.3626	34.2247	0.25133	-0.476283	0.916016	0.633873	0.83299	Not Sig	nonsignificant	proteasome 26S subunit, ATPase 3 [Source:RGD Symbol;Acc:61905]
Ly6h	chr7	919	951	88.9636	88.8513	-0.112273	0.998738	0.773566	0.976219	NotSig	-0.00391267	negligible	239.489	225.229	253.75	0.133828	1.30151	1.12663	0.193083	0.497201	Not Sig	nonsignificant	lymphocyte antigen 6 family member H [Source:RGD Symbol;Acc:1311896]
Pmm1	chr7	170	186	65.7436	66.8762	1.13265	1.01723	0.772413	0.976219	NotSig	-0.0400521	negligible	44.9199	42.8264	47.0134	0.23691	0.647443	1.09777	0.517345	0.760265	Not Sig	nonsignificant	phosphomannomutase 1 [Source:RGD Symbol;Acc:1310897]
Slc27a4	chr3	128	144	81.0158	90.4162	9.40043	1.11603	0.775699	0.976806	NotSig	-0.0193301	negligible	31.4885	29.9921	32.9849	0.269273	0.406024	1.09979	0.684725	0.85825	Not Sig	nonsignificant	solute carrier family 27 member 4 [Source:RGD Symbol;Acc:1307383]
Dpysl2	chr15	619	721	98.0758	99.8435	1.76767	1.01802	0.77588	0.976905	NotSig	-0.0423517	negligible	84.3344	100.017	68.6521	0.178835	-3.05759	0.686407	0.00223127	0.0523248	Not Sig	nonsignificant	dihydropyrimidinase-like 2 [Source:RGD Symbol;Acc:2517]
App	chr11	988	1244	97.4784	99.5714	2.09299	1.02147	0.782723	0.978439	NotSig	-0.0127653	negligible	277.433	287.534	267.331	0.145584	-0.783464	0.929736	0.433355	0.693909	Not Sig	nonsignificant	amyloid beta precursor protein [Source:RGD Symbol;Acc:2139]
Tmed2	chr12	168	230	67.832	67.9146	0.0825598	1.00122	0.780739	0.978439	NotSig	-0.0677791	negligible	42.7549	48.1329	37.3768	0.232808	-1.63176	0.776533	0.10273	0.349073	Not Sig	nonsignificant	transmembrane p24 trafficking protein 2 [Source:RGD Symbol;Acc:69243]
Gabarapl1	chr4	239	319	70.5169	72.1915	1.67467	1.02375	0.781781	0.978439	NotSig	0.00644646	negligible	53.6491	59.4349	47.8633	0.22678	-1.47168	0.805306	0.141106	0.412173	Not Sig	nonsignificant	GABA type A receptor associated protein like 1 [Source:RGD Symbol;Acc:1596143]
Sdcbp	chr5	203	199	82.3768	85.7056	3.32883	1.04041	0.782195	0.978439	NotSig	0.0113222	negligible	50.5402	49.1515	51.929	0.227302	0.425423	1.05651	0.670529	0.852237	Not Sig	nonsignificant	syndecan binding protein [Source:RGD Symbol;Acc:621497]
Sqle	chr7	105	101	76.5377	76.3775	-0.160229	0.997907	0.782621	0.978439	NotSig	0.0107488	negligible	25.917	23.7893	28.0447	0.296321	0.58576	1.17888	0.558037	0.79413	Not Sig	nonsignificant	squalene epoxidase [Source:RGD Symbol;Acc:3755]
Wfs1	chr14	185	266	103.93	100.071	-3.8586	0.962873	0.783255	0.978811	NotSig	-0.0075016	negligible	27.4971	37.6254	17.3689	0.31134	-3.48448	0.461627	0.0004931	0.0241309	FDR<0.05	downregulated	wolframin ER transmembrane glycoprotein [Source:RGD Symbol;Acc:68954]
Hcfc1r1	chr10	308	254	76.8914	76.4361	-0.455273	0.994079	0.784251	0.978901	NotSig	0.0201667	negligible	70.4321	57.1486	83.7156	0.21109	2.48042	1.46488	0.0131227	0.117124	Not Sig	nonsignificant	host cell factor C1 regulator 1 [Source:RGD Symbol;Acc:727975]
Cct6a	chr12	173	229	89.123	91.2332	2.1102	1.02368	0.784444	0.978901	NotSig	-0.0674475	negligible	50.8844	54.4938	47.2751	0.232951	-0.887885	0.867532	0.374603	0.653783	Not Sig	nonsignificant	chaperonin containing TCP1 subunit 6A [Source:RGD Symbol;Acc:1304763]
Txn1	chr5	265	245	57.2591	58.165	0.905891	1.01582	0.785735	0.978901	NotSig	-0.0223842	negligible	42.8875	35.071	50.7039	0.23595	2.12864	1.44575	0.0332838	0.189752	Not Sig	nonsignificant	thioredoxin 1 [Source:RGD Symbol;Acc:621157]
LOC100911847	chr5	1486	1325	41.126	41.8024	0.676303	1.01644	0.785353	0.978901	NotSig	-0.074347	negligible	367.901	320.473	415.329	0.188595	2.01191	1.29599	0.044229	0.216694	Not Sig	nonsignificant
Vapa	chr9	168	186	75.7759	77.3494	1.57351	1.02077	0.78403	0.978901	NotSig	-0.104006	negligible	46.5797	46.6587	46.5007	0.229424	0.127537	0.996612	0.898516	0.953092	Not Sig	nonsignificant	VAMP associated protein A [Source:RGD Symbol;Acc:61803]
Lingo1	chr8	284	293	75.9111	73.0881	-2.823	0.962812	0.787555	0.978916	NotSig	0.0410485	negligible	28.6451	31.3364	25.9537	0.325992	-0.823184	0.828229	0.410403	0.682639	Not Sig	nonsignificant	leucine rich repeat and Ig domain containing 1 [Source:RGD Symbol;Acc:1308668]
Pld3	chr1	445	469	91.6034	90.1793	-1.42403	0.984454	0.791128	0.980405	NotSig	0.0479682	negligible	123.192	116.471	129.913	0.159544	0.948872	1.11541	0.342686	0.631862	Not Sig	nonsignificant	phospholipase D family, member 3 [Source:RGD Symbol;Acc:1308248]
Srsf2	chr10	128	136	148.732	150.31	1.57803	1.01061	0.789523	0.980405	NotSig	-0.0254646	negligible	38.5166	37.1491	39.8841	0.253065	0.481258	1.07362	0.630333	0.83162	Not Sig	nonsignificant	serine and arginine rich splicing factor 2 [Source:RGD Symbol;Acc:1359422]
Hnrnpu	chr13	260	286	95.7482	100.02	4.27188	1.04462	0.792004	0.980481	NotSig	-0.0534009	negligible	50.5013	53.332	47.6706	0.25733	-0.626204	0.893847	0.531181	0.772169	Not Sig	nonsignificant	heterogeneous nuclear ribonucleoprotein U [Source:RGD Symbol;Acc:620372]
Cntnap1	chr10	175	191	144.502	145.469	0.967502	1.0067	0.792858	0.981026	NotSig	0.0275719	negligible	36.5893	38.7058	34.4728	0.250864	-0.703606	0.890636	0.481678	0.729122	Not Sig	nonsignificant	contactin associated protein 1 [Source:RGD Symbol;Acc:70902]
Taf10	chr1	156	147	73.9273	75.2422	1.3149	1.01779	0.808722	0.981973	NotSig	-0.0336238	negligible	40.9855	36.9862	44.9848	0.248756	1.39928	1.21626	0.161729	0.442668	Not Sig	nonsignificant	TATA-box binding protein associated factor 10 [Source:RGD Symbol;Acc:1305907]
Tmem134	chr1	117	87	72.1948	74.5927	2.39791	1.03321	0.812327	0.981973	NotSig	-0.0746273	negligible	28.0478	23.8709	32.2247	0.293748	1.70879	1.34996	0.0874891	0.317544	Not Sig	nonsignificant	transmembrane protein 134 [Source:RGD Symbol;Acc:1305824]
Neurl1	chr1	136	309	81.468	82.1605	0.692464	1.0085	0.800069	0.981973	NotSig	-0.0129026	negligible	39.4314	52.7326	26.1303	0.257276	-4.0391	0.495524	5.36567e-05	0.00725817	FDR<0.05	downregulated	neuralized E3 ubiquitin protein ligase 1 [Source:RGD Symbol;Acc:1307021]
Rack1	chr10	551	594	62.0977	62.6935	0.595812	1.00959	0.807102	0.981973	NotSig	-0.0247508	negligible	152.93	143.855	162.004	0.202238	0.904141	1.12616	0.365921	0.648705	Not Sig	nonsignificant	receptor for activated C kinase 1 [Source:RGD Symbol;Acc:69229]
Ndufaf8	chr10	97	104	56.2619	57.0775	0.815611	1.0145	0.808242	0.981973	NotSig	-0.0217743	negligible	26.3596	24.1315	28.5876	0.297628	0.850186	1.18466	0.395222	0.668744	Not Sig	nonsignificant
Dgcr6	chr11	144	128	81.8758	82.3845	0.508705	1.00621	0.800652	0.981973	NotSig	0.00713587	negligible	35.2405	31.7852	38.6958	0.255812	1.21275	1.21741	0.225225	0.539567	Not Sig	nonsignificant	DiGeorge syndrome critical region gene 6 [Source:RGD Symbol;Acc:1309390]
Rtn4	chr14	669	810	97.598	96.7651	-0.832874	0.991466	0.804126	0.981973	NotSig	0.0213341	negligible	188.142	187.128	189.155	0.153428	0.0218875	1.01083	0.982538	0.992429	Not Sig	nonsignificant	reticulon 4 [Source:RGD Symbol;Acc:620989]
Tkt	chr16	219	266	63.0207	63.5025	0.481776	1.00764	0.800312	0.981973	NotSig	-0.0179921	negligible	61.8745	63.745	60.004	0.204247	-0.449927	0.941313	0.652763	0.845141	Not Sig	nonsignificant	transketolase [Source:RGD Symbol;Acc:621036]
Crlf1	chr16	150	131	68.1805	66.556	-1.62456	0.976173	0.806426	0.981973	NotSig	0.0235054	negligible	35.9262	29.4968	42.3557	0.253252	1.90952	1.43594	0.0561948	0.24509	Not Sig	nonsignificant	cytokine receptor-like factor 1 [Source:RGD Symbol;Acc:1311371]
Mt2A	chr19	360	303	64.4501	63.7779	-0.672213	0.98957	0.801067	0.981973	NotSig	0.0513388	negligible	76.0937	60.2873	91.9002	0.247977	2.52828	1.52437	0.0114623	0.112221	Not Sig	nonsignificant	metallothionein 2A [Source:RGD Symbol;Acc:1592345]
Ndufs4	chr2	120	136	71.2727	72.9909	1.71817	1.02411	0.807553	0.981973	NotSig	0.0107509	negligible	27.4059	29.3549	25.4569	0.29306	-0.63282	0.867212	0.526851	0.769852	Not Sig	nonsignificant	NADH:ubiquinone oxidoreductase subunit S4 [Source:RGD Symbol;Acc:1594380]
Chst1	chr3	242	324	79.6528	80.629	0.97613	1.01225	0.810707	0.981973	NotSig	0.00692793	negligible	41.2408	49.2309	33.2507	0.253989	-2.23679	0.675403	0.0253	0.160781	Not Sig	nonsignificant	carbohydrate sulfotransferase 1 [Source:RGD Symbol;Acc:1308142]
Serf2	chr3	476	337	71.141	69.5947	-1.5463	0.978264	0.80344	0.981973	NotSig	0.0345212	negligible	109.235	85.9767	132.493	0.177957	3.52721	1.54103	0.000419964	0.0234009	FDR<0.05	nonsignificant	small EDRK-rich factor 2 [Source:RGD Symbol;Acc:1588368]
LOC103691939	chr3	13	10	60.8222	51.6008	-9.2214	0.848388	0.804033	0.981973	NotSig	-0.168874	negligible	26.1774	19.1467	33.208	0.29613	2.62043	1.7344	0.00878199	0.105194	Not Sig	nonsignificant
Atp9a	chr3	578	574	71.2509	72.6954	1.44446	1.02027	0.812596	0.981973	NotSig	-0.0381926	negligible	151.204	141.902	160.506	0.144973	1.25603	1.1311	0.209104	0.515027	Not Sig	nonsignificant	ATPase phospholipid transporting 9A (putative) [Source:RGD Symbol;Acc:621421]
Dctn1	chr4	318	371	87.6642	89.3822	1.71795	1.0196	0.810206	0.981973	NotSig	0.0563325	negligible	92.4852	91.4356	93.5348	0.172029	0.19573	1.02296	0.844821	0.930411	Not Sig	nonsignificant
Ahsa1	chr6	116	127	88.1587	85.7544	-2.40435	0.972727	0.803045	0.981973	NotSig	-0.00115539	negligible	30.7953	30.9594	30.6311	0.280372	0.00385313	0.989395	0.996926	0.998725	Not Sig	nonsignificant	activator of Hsp90 ATPase activity 1 [Source:RGD Symbol;Acc:1589285]
H3f3c	chr7	175	141	67.2837	68.1914	0.907701	1.01349	0.811053	0.981973	NotSig	0.0400238	negligible	44.7403	36.8301	52.6505	0.237849	2.21269	1.42955	0.0269189	0.167239	Not Sig	nonsignificant
Ctsh	chr8	155	126	77.3907	79.3484	1.95771	1.0253	0.806992	0.981973	NotSig	-0.106891	negligible	37.7347	29.2274	46.242	0.275268	2.17818	1.58214	0.0293924	0.175406	Not Sig	nonsignificant	cathepsin H [Source:RGD Symbol;Acc:2447]
Fus	chr1	105	153	91.9874	96.0092	4.02182	1.04372	0.802202	0.981973	NotSig	0.037017	negligible	35.8081	37.8329	33.7834	0.282954	-0.635827	0.892962	0.524889	0.768637	Not Sig	nonsignificant	Fus RNA binding protein [Source:RGD Symbol;Acc:1308864]
Glrx2	chr13	134	127	69.484	68.385	-1.099	0.984183	0.808786	0.981973	NotSig	0.0653649	negligible	32.2169	29.9057	34.5282	0.285507	0.734818	1.15457	0.46245	0.712285	Not Sig	nonsignificant	glutaredoxin 2 [Source:RGD Symbol;Acc:1307950]
Necab2	chr19	116	133	94.415	96.86	2.44498	1.0259	0.80358	0.981973	NotSig	-0.109856	negligible	29.8613	28.7366	30.9859	0.286944	0.177127	1.07827	0.859408	0.938866	Not Sig	nonsignificant	N-terminal EF-hand calcium binding protein 2 [Source:RGD Symbol;Acc:621844]
Ap2a2	chr1	234	283	92.9274	96.2786	3.35112	1.03606	0.813892	0.982845	NotSig	0.0225737	negligible	54.4804	56.2431	52.7177	0.218158	-0.389786	0.937319	0.696695	0.86567	Not Sig	nonsignificant	adaptor related protein complex 2 subunit alpha 2 [Source:RGD Symbol;Acc:71015]
Grik5	chr1	212	239	67.3211	64.6796	-2.64151	0.960763	0.819628	0.982885	NotSig	0.0237575	negligible	56.0412	55.3577	56.7247	0.220398	0.159237	1.02469	0.873482	0.942538	Not Sig	nonsignificant	glutamate ionotropic receptor kainate type subunit 5 [Source:RGD Symbol;Acc:2735]
Fads2	chr1	276	301	68.2403	68.2687	0.0284771	1.00042	0.820839	0.982885	NotSig	-0.0154341	negligible	50.6915	48.2045	53.1784	0.224909	0.52365	1.10318	0.600522	0.816815	Not Sig	nonsignificant	fatty acid desaturase 2 [Source:RGD Symbol;Acc:68339]
Skp1	chr10	476	482	88.1045	87.9468	-0.15767	0.99821	0.822783	0.982885	NotSig	-0.0223538	negligible	119.636	111.889	127.383	0.158786	1.14138	1.13848	0.253712	0.570081	Not Sig	nonsignificant	S-phase kinase-associated protein 1 [Source:RGD Symbol;Acc:1359648]
Rufy3	chr14	146	168	95.7524	93.9615	-1.7909	0.981297	0.8225	0.982885	NotSig	0.0186199	negligible	26.8268	30.6623	22.9914	0.287124	-1.35251	0.749828	0.176212	0.469429	Not Sig	nonsignificant	RUN and FYVE domain containing 3 [Source:RGD Symbol;Acc:1565242]
Spcs1	chr16	214	255	76.1188	79.2753	3.15657	1.04147	0.817422	0.982885	NotSig	-0.0223329	negligible	65.1784	65.0797	65.2771	0.203414	0.170657	1.00303	0.864494	0.938941	Not Sig	nonsignificant	signal peptidase complex subunit 1 [Source:RGD Symbol;Acc:1309125]
Ssr3	chr2	161	183	84.018	81.384	-2.63408	0.968649	0.82331	0.982885	NotSig	0.0760308	negligible	28.8708	32.2603	25.4813	0.276162	-1.20731	0.789865	0.227312	0.541343	Not Sig	nonsignificant	signal sequence receptor subunit 3 [Source:RGD Symbol;Acc:621630]
Ssr2	chr2	141	183	68.746	67.7802	-0.965786	0.985951	0.82066	0.982885	NotSig	-0.0131909	negligible	41.0577	42.9494	39.166	0.241831	-0.435152	0.911911	0.663452	0.847283	Not Sig	nonsignificant	signal sequence receptor subunit 2 [Source:RGD Symbol;Acc:1308365]
Edf1	chr3	253	254	66.2408	68.7096	2.46881	1.03727	0.8232	0.982885	NotSig	-0.0341683	negligible	63.1061	56.8329	69.3792	0.199691	1.44401	1.22076	0.148737	0.423329	Not Sig	nonsignificant	endothelial differentiation-related factor 1 [Source:RGD Symbol;Acc:1308073]
Lhx2	chr3	150	115	63.6852	64.1781	0.492877	1.00774	0.815225	0.982885	NotSig	-0.0102872	negligible	35.3889	29.3237	41.4541	0.271181	1.95388	1.41367	0.0507158	0.229504	Not Sig	nonsignificant	LIM homeobox 2 [Source:RGD Symbol;Acc:71076]
Dlgap4	chr3	181	210	75.5438	75.5858	0.0420087	1.00056	0.818984	0.982885	NotSig	0.0353889	negligible	38.0916	40.8242	35.3589	0.252359	-0.800184	0.866126	0.423604	0.690794	Not Sig	nonsignificant	DLG associated protein 4 [Source:RGD Symbol;Acc:708350]
Clstn3	chr4	253	293	83.6058	82.3242	-1.28155	0.984672	0.815041	0.982885	NotSig	-0.0510303	negligible	27.4685	35.275	19.6619	0.30031	-2.70232	0.557391	0.00688583	0.0963437	Not Sig	nonsignificant	calsyntenin 3 [Source:RGD Symbol;Acc:621153]
Ndufa9	chr4	104	113	71.6805	70.223	-1.45751	0.979667	0.817697	0.982885	NotSig	0.0387748	negligible	29.3232	27.8509	30.7955	0.283042	0.61817	1.10573	0.536463	0.777381	Not Sig	nonsignificant	NADH:ubiquinone oxidoreductase subunit A9 [Source:RGD Symbol;Acc:1307307]
Atp6v1h	chr5	83	121	92.2278	94.534	2.3062	1.02501	0.821401	0.982885	NotSig	-0.0166566	negligible	28.0417	32.5285	23.5548	0.285404	-1.55149	0.724129	0.120785	0.377278	Not Sig	nonsignificant	ATPase H+ transporting V1 subunit H [Source:RGD Symbol;Acc:1562450]
Atf4	chr7	111	108	117.531	111.896	-5.63502	0.952055	0.816139	0.982885	NotSig	0.0220997	negligible	26.2419	24.8622	27.6217	0.289287	0.420782	1.11099	0.673914	0.854583	Not Sig	nonsignificant	activating transcription factor 4 [Source:RGD Symbol;Acc:621863]
Serpine2	chr9	448	398	80.9789	81.0645	0.0856492	1.00106	0.815665	0.982885	NotSig	-0.000693236	negligible	109.745	96.8645	122.626	0.174324	1.92615	1.26596	0.0540858	0.240783	Not Sig	nonsignificant	serpin family E member 2 [Source:RGD Symbol;Acc:3748]
Bex2	chrX	160	137	70.7557	69.91	-0.84569	0.988048	0.815655	0.982885	NotSig	0.00605487	negligible	37.1991	30.9797	43.4185	0.271666	1.67072	1.40152	0.0947765	0.332502	Not Sig	nonsignificant	brain expressed X-linked 2 [Source:RGD Symbol;Acc:1564643]
Glrx3	chr1	98	102	64.0085	62.448	-1.56057	0.975619	0.823996	0.983136	NotSig	0.00609236	negligible	26.9973	25.6803	28.3144	0.281644	0.606772	1.10257	0.544002	0.78109	Not Sig	nonsignificant	glutaredoxin 3 [Source:RGD Symbol;Acc:69414]
Hsph1	chr12	164	261	79.8312	80.7965	0.965338	1.01209	0.824407	0.983475	NotSig	0.00404885	negligible	49.0018	57.5068	40.4968	0.240532	-2.06624	0.70421	0.0388058	0.203694	Not Sig	nonsignificant	heat shock protein family H (Hsp110) member 1 [Source:RGD Symbol;Acc:1311609]
LOC100363452	chr3	37	36	52.6666	52.0201	-0.646531	0.987724	0.825294	0.984068	NotSig	0.0181447	negligible	80.0573	70.3863	89.7283	0.191087	1.734	1.2748	0.0829182	0.306797	Not Sig	nonsignificant	ribosomal protein S8-like [Source:RGD Symbol;Acc:2322993]
Prelid1	chr17	180	157	66.7176	67.6022	0.884575	1.01326	0.827415	0.984255	NotSig	-0.0705094	negligible	46.3226	39.5865	53.0587	0.225487	1.97753	1.34032	0.0479819	0.222535	Not Sig	nonsignificant	PRELI domain containing 1 [Source:RGD Symbol;Acc:1308082]
Cd63	chr7	310	325	60.9156	60.4075	-0.508118	0.991659	0.827167	0.984255	NotSig	0.0396323	negligible	88.2804	83.5275	93.0334	0.210855	0.816123	1.11381	0.41443	0.683915	Not Sig	nonsignificant	Cd63 molecule [Source:RGD Symbol;Acc:62080]
Tubb5	chr20	511	610	70.9495	71.8533	0.903771	1.01274	0.828564	0.984637	NotSig	-0.0382021	negligible	83.7962	88.777	78.8155	0.19596	-1.03415	0.887791	0.301065	0.607604	Not Sig	nonsignificant	tubulin, beta 5 class I [Source:RGD Symbol;Acc:628596]
Ppib	chr8	481	469	66.8696	66.4445	-0.425143	0.993642	0.830789	0.985805	NotSig	0.0468591	negligible	130.802	121.244	140.36	0.162079	1.4115	1.15767	0.158098	0.435817	Not Sig	nonsignificant	peptidylprolyl isomerase B [Source:RGD Symbol;Acc:620312]
Xpnpep1	chr1	98	124	84.3203	87.4381	3.11785	1.03698	0.831682	0.986143	NotSig	-0.0278225	negligible	27.7523	26.869	28.6356	0.279806	0.228001	1.06575	0.819646	0.91738	Not Sig	nonsignificant	X-prolyl aminopeptidase 1 [Source:RGD Symbol;Acc:621274]
Anxa11	chr16	89	145	112.38	109.447	-2.93281	0.973903	0.832995	0.986143	NotSig	0.0644165	negligible	29.3247	32.5571	26.0923	0.28165	-1.1082	0.801431	0.267777	0.580312	Not Sig	nonsignificant	annexin A11 [Source:RGD Symbol;Acc:1309911]
Cbx3	chr4	155	156	91.5835	88.563	-3.02052	0.967019	0.833671	0.986519	NotSig	-0.00547193	negligible	32.0521	30.1523	33.9518	0.259603	0.613071	1.12601	0.539829	0.779526	Not Sig	nonsignificant	chromobox 3 [Source:RGD Symbol;Acc:1549705]
Nisch	chr16	355	432	79.7538	81.5512	1.79746	1.02254	0.836843	0.987002	NotSig	-0.00294241	negligible	98.4499	103.475	93.4242	0.188128	-0.705428	0.902864	0.480544	0.729122	Not Sig	nonsignificant	nischarin [Source:RGD Symbol;Acc:1306950]
Nrn1	chr17	284	334	78.856	81.9814	3.12544	1.03963	0.837731	0.987002	NotSig	-0.000971953	negligible	63.6789	71.262	56.0957	0.237717	-1.41203	0.787176	0.157941	0.435817	Not Sig	nonsignificant	neuritin 1 [Source:RGD Symbol;Acc:621586]
Mapk8ip1	chr3	625	582	76.1731	76.439	0.265928	1.00349	0.836213	0.987002	NotSig	-0.00650472	negligible	154.936	140.899	168.974	0.144471	1.75068	1.19926	0.0800015	0.300006	Not Sig	nonsignificant	mitogen-activated protein kinase 8 interacting protein 1 [Source:RGD Symbol;Acc:70937]
Scg5	chr3	637	736	98.3976	100.709	2.31187	1.0235	0.835488	0.987002	NotSig	-0.00564768	negligible	179.677	181.097	178.256	0.146319	-0.0901104	0.98431	0.928199	0.967807	Not Sig	nonsignificant	secretogranin V [Source:RGD Symbol;Acc:3669]
Tmem259	chr7	150	157	99.6679	97.0976	-2.57028	0.974212	0.835939	0.987002	NotSig	0.0392305	negligible	39.8852	38.1881	41.5823	0.247859	0.689899	1.08888	0.490258	0.735406	Not Sig	nonsignificant	transmembrane protein 259 [Source:RGD Symbol;Acc:1311136]
Napa	chr1	198	220	90.9421	89.8272	-1.11489	0.987741	0.840307	0.987192	NotSig	0.11186	negligible	52.5457	52.4355	52.6558	0.219946	0.195116	1.0042	0.845302	0.930411	Not Sig	nonsignificant	NSF attachment protein alpha [Source:RGD Symbol;Acc:620855]
Sv2b	chr1	245	311	105.61	108.007	2.39703	1.0227	0.840489	0.987192	NotSig	-0.00748466	negligible	30.5581	37.8427	23.2734	0.304416	-2.31801	0.615005	0.020449	0.149989	Not Sig	nonsignificant	synaptic vesicle glycoprotein 2b [Source:RGD Symbol;Acc:619716]
Ndufb2	chr4	395	347	66.1638	64.9344	-1.22945	0.981418	0.840167	0.987192	NotSig	0.0484858	negligible	93.6372	80.6604	106.614	0.177447	2.30399	1.32176	0.0212235	0.15364	Not Sig	nonsignificant	NADH:ubiquinone oxidoreductase subunit B2 [Source:RGD Symbol;Acc:1308130]
Cs	chr7	199	263	86.9956	88.5162	1.52062	1.01748	0.840215	0.987192	NotSig	-0.0600436	negligible	35.5889	40.6688	30.5091	0.261919	-1.61827	0.750185	0.105605	0.356659	Not Sig	nonsignificant	citrate synthase [Source:RGD Symbol;Acc:620330]
Gdi1	chrX	451	544	96.6131	96.2037	-0.409402	0.995762	0.840441	0.987192	NotSig	0.0558623	negligible	120.578	122.534	118.621	0.159315	-0.412816	0.968062	0.679742	0.857402	Not Sig	nonsignificant	GDP dissociation inhibitor 1 [Source:RGD Symbol;Acc:2676]
Rnaset2	chr1	123	140	62.2573	64.3666	2.10936	1.03388	0.843502	0.987334	NotSig	0.0234942	negligible	33.5013	32.2358	34.7668	0.274389	0.338404	1.07852	0.735059	0.879219	Not Sig	nonsignificant	ribonuclease T2 [Source:RGD Symbol;Acc:1309918]
Clptm1	chr1	228	268	73.0624	72.7971	-0.26534	0.996368	0.842538	0.987334	NotSig	0.00663585	negligible	62.8445	59.6471	66.042	0.207956	0.544716	1.10721	0.585949	0.809981	Not Sig	nonsignificant	CLPTM1 regulator of GABA type A receptor forward trafficking [Source:RGD Symbol;Acc:1310959]
Abca3	chr10	141	159	106.518	105.841	-0.677283	0.993642	0.845105	0.987334	NotSig	-0.00831008	negligible	36.5164	37.2985	35.7342	0.253703	-0.176529	0.958059	0.859878	0.938866	Not Sig	nonsignificant	ATP binding cassette subfamily A member 3 [Source:RGD Symbol;Acc:1307174]
Arhgef25	chr7	96	119	89.5554	86.7952	-2.76023	0.969178	0.843534	0.987334	NotSig	0.0514282	negligible	27.6407	28.2685	27.013	0.281463	-0.339159	0.955586	0.73449	0.87917	Not Sig	nonsignificant	Rho guanine nucleotide exchange factor 25 [Source:RGD Symbol;Acc:735210]
Elmod1	chr8	190	246	98.0571	97.2441	-0.81299	0.991709	0.842035	0.987334	NotSig	-0.00139936	negligible	50.3808	54.6047	46.1568	0.226173	-1.01572	0.84529	0.30976	0.611536	Not Sig	nonsignificant	ELMO domain containing 1 [Source:RGD Symbol;Acc:1564186]
Gpm6b	chrX	1620	1517	106.794	109.087	2.29319	1.02147	0.844738	0.987334	NotSig	-0.00382453	negligible	302.808	286.781	318.836	0.131798	1.07379	1.11178	0.282918	0.593691	Not Sig	nonsignificant	glycoprotein m6b [Source:RGD Symbol;Acc:620580]
Micos10	chr5	220	195	63.5798	64.2595	0.679632	1.01069	0.846542	0.987753	NotSig	-0.0542186	negligible	54.5594	49.1015	60.0173	0.235951	1.43996	1.22231	0.149879	0.424402	Not Sig	nonsignificant	mitochondrial contact site and cristae organizing system subunit 10 [Source:RGD Symbol;Acc:1560187]
Ppp1cb	chr6	210	244	83.3922	82.5519	-0.840364	0.989923	0.84612	0.987753	NotSig	-0.0188811	negligible	47.4663	48.5716	46.361	0.222848	-0.206974	0.954488	0.83603	0.926816	Not Sig	nonsignificant	protein phosphatase 1 catalytic subunit beta [Source:RGD Symbol;Acc:3376]
Grk2	chr1	138	173	71.3724	72.4559	1.08354	1.01518	0.850489	0.987773	NotSig	-0.0189874	negligible	26.2178	27.4041	25.0315	0.296089	-0.43136	0.913422	0.666206	0.849337	Not Sig	nonsignificant	G protein-coupled receptor kinase 2 [Source:RGD Symbol;Acc:2062]
Lamtor2	chr2	213	199	50.5831	51.3526	0.769491	1.01521	0.847666	0.987773	NotSig	-0.0533577	negligible	48.0283	43.1817	52.875	0.226335	1.39867	1.22448	0.161913	0.442668	Not Sig	nonsignificant	late endosomal/lysosomal adaptor, MAPK and MTOR activator 2 [Source:RGD Symbol;Acc:1562501]
Gstm1	chr2	381	302	85.5138	86.1024	0.588548	1.00688	0.848718	0.987773	NotSig	0.00290335	negligible	95.2968	78.3614	112.232	0.178427	3.00523	1.43224	0.00265381	0.0578926	Not Sig	nonsignificant	glutathione S-transferase mu 1 [Source:RGD Symbol;Acc:2755]
Tmem50b	chr11	253	273	99.4526	97.7931	-1.65949	0.983314	0.852866	0.988179	NotSig	0.0121191	negligible	53.0344	51.6243	54.4444	0.218718	0.265383	1.05463	0.790715	0.902977	Not Sig	nonsignificant	transmembrane protein 50B [Source:RGD Symbol;Acc:1307561]
Gstm5	chr2	219	178	72.2052	73.4525	1.24737	1.01728	0.854155	0.988179	NotSig	-0.00655467	negligible	56.1672	46.7357	65.5988	0.226238	2.24435	1.40361	0.0248096	0.159009	Not Sig	nonsignificant	glutathione S-transferase, mu 5 [Source:RGD Symbol;Acc:61964]
Scaf1	chr1	125	179	65.7986	67.6847	1.8861	1.02866	0.856357	0.988612	NotSig	-0.0400678	negligible	34.2594	38.2439	30.2748	0.272044	-1.09281	0.791624	0.274479	0.585289	Not Sig	nonsignificant	SR-related CTD-associated factor 1 [Source:RGD Symbol;Acc:708405]
Ube2i	chr10	142	155	71.0694	70.8466	-0.222845	0.996864	0.857229	0.988612	NotSig	-0.0595473	negligible	26.4269	28.0541	24.7996	0.287214	-0.600964	0.883992	0.547864	0.783672	Not Sig	nonsignificant	ubiquitin-conjugating enzyme E2I [Source:RGD Symbol;Acc:3926]
Psmb3	chr10	124	119	68.0652	65.465	-2.60022	0.961798	0.856567	0.988612	NotSig	0.0588403	negligible	30.3902	30.5875	30.1929	0.284541	0.119007	0.987098	0.90527	0.953971	Not Sig	nonsignificant	proteasome 20S subunit beta 3 [Source:RGD Symbol;Acc:61875]
Ndufa12	chr7	227	187	64.159	63.8072	-0.35186	0.994516	0.856879	0.988612	NotSig	0.00156618	negligible	55.2483	44.2715	66.2252	0.216423	2.49519	1.49589	0.012589	0.114885	Not Sig	nonsignificant	NADH:ubiquinone oxidoreductase subunit A12 [Source:RGD Symbol;Acc:1311462]
Celf4	chr18	165	243	81.4622	85.8819	4.41971	1.05425	0.857767	0.988612	NotSig	-0.00837439	negligible	31.4094	38.377	24.4417	0.292818	-2.29269	0.636884	0.0218659	0.155352	Not Sig	nonsignificant	CUGBP, Elav-like family member 4 [Source:RGD Symbol;Acc:1307630]
Nedd8	chr15	182	195	76.7796	79.2629	2.48333	1.03234	0.860726	0.988655	NotSig	-0.0622309	negligible	47.2941	45.706	48.8821	0.224993	0.580329	1.06949	0.561693	0.795253	Not Sig	nonsignificant	NEDD8 ubiquitin like modifier [Source:RGD Symbol;Acc:3158]
Ttr	chr18	1355	1486	105.462	105.813	0.35074	1.00333	0.860609	0.988655	NotSig	0.0233249	negligible	372.281	359.319	385.244	0.363775	0.278411	1.07215	0.780697	0.896865	Not Sig	nonsignificant	transthyretin [Source:RGD Symbol;Acc:3916]
Slc39a7	chr20	160	194	71.7158	72.9318	1.21605	1.01696	0.860003	0.988655	NotSig	0.0038138	negligible	42.453	45.9995	38.9065	0.238253	-0.838658	0.845802	0.401661	0.676204	Not Sig	nonsignificant	solute carrier family 39 member 7 [Source:RGD Symbol;Acc:1593280]
Glo1	chr20	219	207	66.2196	69.0487	2.82905	1.04272	0.858453	0.988655	NotSig	-0.014623	negligible	52.4556	47.7019	57.2092	0.22017	1.33481	1.19931	0.18194	0.477331	Not Sig	nonsignificant	glyoxalase 1 [Source:RGD Symbol;Acc:2702]
Ddost	chr5	214	246	75.739	75.7796	0.0405888	1.00054	0.859622	0.988655	NotSig	-0.0127753	negligible	54.3307	52.6863	55.9752	0.218109	0.294825	1.06242	0.768128	0.896076	Not Sig	nonsignificant	dolichyl-diphosphooligosaccharide--protein glycosyltransferase non-catalytic subunit [Source:RGD Symbol;Acc:1308970]
LOC100912557	chr6	301	303	72.1988	72.4662	0.267421	1.0037	0.859336	0.988655	NotSig	0.0398989	negligible	29.6001	27.4027	31.7974	0.297927	0.778463	1.16038	0.436296	0.696459	Not Sig	nonsignificant
Pcbp4	chr8	175	198	73.4532	74.9657	1.5125	1.02059	0.859077	0.988655	NotSig	0.00231767	negligible	47.7376	45.6914	49.7839	0.223088	0.403673	1.08957	0.686453	0.85825	Not Sig	nonsignificant	poly(rC) binding protein 4 [Source:RGD Symbol;Acc:1307910]
Hspe1	chr9	275	225	62.8462	61.3674	-1.47884	0.976469	0.859739	0.988655	NotSig	0.00837907	negligible	65.0066	54.5552	75.458	0.209586	2.24916	1.38315	0.0245021	0.158739	Not Sig	nonsignificant	heat shock protein family E (Hsp10) member 1 [Source:RGD Symbol;Acc:2844]
S100a16	chr2	353	312	65.6145	66.6017	0.987228	1.01505	0.863191	0.988953	NotSig	-0.0425417	negligible	89.6452	80.0912	99.1991	0.217368	1.5688	1.23858	0.116695	0.37353	Not Sig	nonsignificant	S100 calcium binding protein A16 [Source:RGD Symbol;Acc:1306770]
Rab7a	chr4	222	265	77.2261	78.7068	1.48073	1.01917	0.861929	0.988953	NotSig	-0.00796622	negligible	64.0102	64.764	63.2564	0.216414	-0.192931	0.976722	0.847013	0.931491	Not Sig	nonsignificant	RAB7A, member RAS oncogene family [Source:RGD Symbol;Acc:61908]
Ssbp4	chr16	113	128	79.8371	81.5967	1.7596	1.02204	0.865462	0.988971	NotSig	0.0401701	negligible	29.8977	28.6829	31.1126	0.284012	0.286249	1.08471	0.774688	0.896501	Not Sig	nonsignificant	single stranded DNA binding protein 4 [Source:RGD Symbol;Acc:1359619]
LOC100360573	chr19	16	11	72.4505	62.1846	-10.266	0.858304	0.865261	0.988971	NotSig	0.430164	small	79.2549	61.2273	97.2826	0.230465	2.81389	1.58888	0.00489462	0.0776147	Not Sig	nonsignificant	ribosomal protein S12-like [Source:RGD Symbol;Acc:2321884]
Dner	chr9	184	200	117.944	120.863	2.91935	1.02475	0.864804	0.988971	NotSig	-0.032043	negligible	44.422	44.7947	44.0493	0.233503	-0.056259	0.98336	0.955135	0.980605	Not Sig	nonsignificant	delta/notch-like EGF repeat containing [Source:RGD Symbol;Acc:1359385]
Pcnp	chr11	160	157	85.2434	85.7446	0.501279	1.00588	0.872435	0.989113	NotSig	0.0145503	negligible	30.6293	27.2446	34.014	0.299508	0.970752	1.24847	0.331672	0.626706	Not Sig	nonsignificant	PEST proteolytic signal containing nuclear protein [Source:RGD Symbol;Acc:1563775]
Atp6v1b2	chr16	254	355	96.8167	98.0927	1.27594	1.01318	0.866829	0.989113	NotSig	-0.0328267	negligible	68.912	79.5005	58.3236	0.200111	-2.16913	0.733626	0.0300731	0.176932	Not Sig	nonsignificant	ATPase H+ transporting V1 subunit B2 [Source:RGD Symbol;Acc:620284]
Rabl6	chr3	128	133	77.9529	80.7215	2.76859	1.03552	0.872291	0.989113	NotSig	-0.023355	negligible	32.0082	28.7108	35.3056	0.273129	1.03096	1.2297	0.30256	0.609061	Not Sig	nonsignificant	RAB, member RAS oncogene family-like 6 [Source:RGD Symbol;Acc:1307615]
Vti1b	chr6	107	112	52.5978	52.9841	0.386293	1.00734	0.868655	0.989113	NotSig	0.00835881	negligible	28.0278	25.5514	30.5041	0.288149	0.939162	1.19383	0.347648	0.637482	Not Sig	nonsignificant	vesicle transport through interaction with t-SNAREs 1B [Source:RGD Symbol;Acc:2323682]
Manf	chr8	141	136	69.4511	71.3273	1.87618	1.02701	0.870681	0.989113	NotSig	-0.0161861	negligible	35.7603	33.0031	38.5175	0.262106	0.993422	1.16709	0.320504	0.618419	Not Sig	nonsignificant	mesencephalic astrocyte-derived neurotrophic factor [Source:RGD Symbol;Acc:1307252]
Phgdh	chr2	212	209	69.0039	67.3726	-1.63127	0.97636	0.873648	0.989337	NotSig	0.067555	negligible	54.8685	51.4097	58.3272	0.209464	0.863461	1.13456	0.387884	0.661708	Not Sig	nonsignificant	phosphoglycerate dehydrogenase [Source:RGD Symbol;Acc:61987]
Nomo1	chr1	124	134	81.6236	82.3853	0.761664	1.00933	0.876581	0.989649	NotSig	0.027051	negligible	33.2114	31.87	34.5528	0.260833	0.566785	1.08418	0.57086	0.798054	Not Sig	nonsignificant	Nodal modulator 1 [Source:RGD Symbol;Acc:1305240]
Gstp1	chr1	201	188	72.7426	73.8342	1.09159	1.01501	0.875942	0.989649	NotSig	-0.0218982	negligible	53.2325	46.9393	59.5258	0.24487	1.42585	1.26814	0.15391	0.43069	Not Sig	nonsignificant	glutathione S-transferase pi 1 [Source:RGD Symbol;Acc:2758]
Cdip1	chr10	198	208	75.3253	77.7443	2.41896	1.03211	0.875944	0.989649	NotSig	0.0670191	negligible	38.3353	39.4203	37.2503	0.249436	-0.300563	0.944953	0.763748	0.896076	Not Sig	nonsignificant	cell death-inducing p53 target 1 [Source:RGD Symbol;Acc:1310686]
Ptpmt1	chr3	120	145	72.9151	73.4075	0.492413	1.00675	0.876513	0.989649	NotSig	0.0492595	negligible	31.1518	29.482	32.8215	0.268401	0.483011	1.11327	0.629088	0.83162	Not Sig	nonsignificant	protein tyrosine phosphatase, mitochondrial 1 [Source:RGD Symbol;Acc:1589783]
Serp1	chr2	123	131	89.5899	90.1271	0.537268	1.006	0.877083	0.989668	NotSig	0.0924799	negligible	26.4223	27.0329	25.8117	0.303186	-0.159944	0.954825	0.872925	0.942538	Not Sig	nonsignificant	stress-associated endoplasmic reticulum protein 1 [Source:RGD Symbol;Acc:620790]
LOC120093065	chr1	1643	1032	35.3961	34.963	-0.433065	0.987765	0.87928	0.989928	NotSig	-0.0176475	negligible	308.154	215.247	401.061	0.745734	1.20574	1.86326	0.227917	0.541343	Not Sig	nonsignificant
Nckap1	chr3	293	379	86.5324	88.2422	1.70978	1.01976	0.878182	0.989928	NotSig	0.00217577	negligible	89.0348	95.5043	82.5652	0.188076	-1.07216	0.864518	0.283647	0.594052	Not Sig	nonsignificant	NCK-associated protein 1 [Source:RGD Symbol;Acc:61939]
Cyc1	chr7	262	222	73.5833	72.7209	-0.862464	0.988279	0.881525	0.990558	NotSig	-0.0508233	negligible	62.5343	53.7012	71.3673	0.19948	1.99209	1.32897	0.0463613	0.220547	Not Sig	nonsignificant	cytochrome c-1 [Source:RGD Symbol;Acc:1306597]
Metrn	chr10	352	321	71.019	71.7844	0.765366	1.01078	0.882286	0.990607	NotSig	-0.014393	negligible	90.5035	78.2035	102.803	0.18565	2.27648	1.31456	0.0228174	0.155468	Not Sig	nonsignificant	meteorin, glial cell differentiation regulator [Source:RGD Symbol;Acc:1306222]
Serinc3	chr3	310	374	90.4078	90.4828	0.0749734	1.00083	0.881801	0.990607	NotSig	0.0143322	negligible	79.3952	80.9876	77.8028	0.18799	-0.347474	0.960675	0.728235	0.877094	Not Sig	nonsignificant	serine incorporator 3 [Source:RGD Symbol;Acc:1308390]
Sub1	chr2	299	253	69.4326	69.2058	-0.226846	0.996733	0.883113	0.991026	NotSig	-0.0137238	negligible	57.2467	52.382	62.1115	0.216849	1.05826	1.18574	0.289937	0.597749	Not Sig	nonsignificant	SUB1 regulator of transcription [Source:RGD Symbol;Acc:621582]
Dbp	chr1	257	243	67.8375	68.2346	0.39711	1.00585	0.884528	0.991197	NotSig	0.0275482	negligible	62.5149	53.924	71.1059	0.206447	1.83839	1.31863	0.0660046	0.270019	Not Sig	nonsignificant	D-box binding PAR bZIP transcription factor [Source:RGD Symbol;Acc:2491]
Idh2	chr1	123	111	93.8603	96.7761	2.91579	1.03107	0.883906	0.991197	NotSig	-0.00910869	negligible	31.4058	27.228	35.5835	0.26521	1.38583	1.30687	0.165799	0.451072	Not Sig	nonsignificant	isocitrate dehydrogenase (NADP(+)) 2 [Source:RGD Symbol;Acc:1597139]
Glud1	chr16	683	604	82.1878	83.2824	1.09458	1.01332	0.884395	0.991197	NotSig	-0.0133375	negligible	146.764	134.198	159.33	0.156008	1.71632	1.18727	0.086103	0.31508	Not Sig	nonsignificant	glutamate dehydrogenase 1 [Source:RGD Symbol;Acc:2708]
Hmgn3	chr8	116	99	100.381	99.7506	-0.63014	0.993722	0.885446	0.991197	NotSig	0.0485281	negligible	28.5285	25.4199	31.6371	0.289843	0.928368	1.24458	0.353217	0.640399	Not Sig	nonsignificant	high mobility group nucleosomal binding domain 3 [Source:RGD Symbol;Acc:1359106]
Ndufa8	chr3	427	428	63.5305	63.9812	0.450702	1.00709	0.886572	0.991214	NotSig	-0.0513855	negligible	114.464	105.209	123.718	0.19098	1.27488	1.17592	0.202351	0.506637	Not Sig	nonsignificant	NADH:ubiquinone oxidoreductase subunit A8 [Source:RGD Symbol;Acc:1306283]
LOC498555	chr15	241	199	44.2756	44.2436	-0.031955	0.999278	0.892137	0.991527	NotSig	0.0210538	negligible	110.521	92.1151	128.926	0.166159	2.83748	1.39962	0.00454706	0.0772914	Not Sig	nonsignificant	similar to 60S acidic ribosomal protein P2 [Source:RGD Symbol;Acc:1590791]
Ndufa13	chr16	594	590	52.9455	52.9468	0.00129931	1.00002	0.891554	0.991527	NotSig	-0.0218666	negligible	129.333	117.374	141.291	0.165294	1.6916	1.20376	0.0907215	0.324842	Not Sig	nonsignificant	NADH:ubiquinone oxidoreductase subunit A13 [Source:RGD Symbol;Acc:6492821]
Cxcl14	chr17	508	460	67.2958	67.7826	0.486813	1.00723	0.891503	0.991527	NotSig	0.00584817	negligible	115.672	105.887	125.457	0.168635	1.53622	1.18483	0.124485	0.383387	Not Sig	nonsignificant	C-X-C motif chemokine ligand 14 [Source:RGD Symbol;Acc:1307406]
Zer1	chr3	188	220	94.0416	92.4544	-1.58725	0.983122	0.890469	0.991527	NotSig	0.00194287	negligible	46.0679	49.5065	42.6293	0.251668	-0.704229	0.861084	0.48129	0.729122	Not Sig	nonsignificant	zyg-11 related, cell cycle regulator [Source:RGD Symbol;Acc:1310284]
Ost4	chr6	131	120	64.331	66.019	1.68797	1.02624	0.892008	0.991527	NotSig	-0.0356107	negligible	34.3143	30.5552	38.0733	0.260323	1.32049	1.24605	0.18667	0.484876	Not Sig	nonsignificant
Dazap2	chr7	294	248	83.0457	83.5828	0.537088	1.00647	0.889437	0.991527	NotSig	-0.0611656	negligible	58.6283	50.6601	66.5965	0.212874	1.86912	1.31458	0.0616058	0.260367	Not Sig	nonsignificant	DAZ associated protein 2 [Source:RGD Symbol;Acc:1307407]
Nbr1	chr10	125	126	85.3256	84.889	-0.436671	0.994882	0.894863	0.991677	NotSig	0.0293038	negligible	25.2036	23.311	27.0962	0.29705	0.842449	1.16238	0.399537	0.673991	Not Sig	nonsignificant	NBR1, autophagy cargo receptor [Source:RGD Symbol;Acc:69195]
RGD1562987	chr18	286	230	84.42	84.2799	-0.140167	0.99834	0.894848	0.991677	NotSig	0.026465	negligible	69.5402	58.9222	80.1583	0.202239	2.32536	1.36041	0.0200529	0.149512	Not Sig	nonsignificant
Hsd17b10	chrX	93	97	55.1913	55.9644	0.773016	1.01401	0.895013	0.991677	NotSig	0.0312239	negligible	26.2716	24.3837	28.1595	0.290744	0.737896	1.15485	0.460577	0.711076	Not Sig	nonsignificant	hydroxysteroid (17-beta) dehydrogenase 10 [Source:RGD Symbol;Acc:69231]
Rogdi	chr10	86	120	98.1849	94.6755	-3.50937	0.964257	0.898157	0.991884	NotSig	0.0436732	negligible	25.2627	26.7268	23.7985	0.315468	-0.528963	0.890437	0.596831	0.815865	Not Sig	nonsignificant	rogdi atypical leucine zipper [Source:RGD Symbol;Acc:1560021]
Hdac5	chr10	77	126	60.2378	62.4059	2.1681	1.03599	0.898111	0.991884	NotSig	0.014941	negligible	26.6652	30.443	22.8873	0.291375	-1.51301	0.75181	0.130277	0.395822	Not Sig	nonsignificant	histone deacetylase 5 [Source:RGD Symbol;Acc:619980]
Gtf2i	chr12	183	196	85.0852	86.2096	1.12436	1.01321	0.897341	0.991884	NotSig	0.0297072	negligible	48.2992	44.3584	52.24	0.223099	1.02074	1.17768	0.307379	0.610959	Not Sig	nonsignificant	general transcription factor II I [Source:RGD Symbol;Acc:727961]
Rbm39	chr3	143	160	164.201	160.078	-4.12257	0.974893	0.898096	0.991884	NotSig	0.00990636	negligible	32.2926	32.7127	31.8725	0.262911	-0.0723688	0.974316	0.942308	0.97405	Not Sig	nonsignificant	RNA binding motif protein 39 [Source:RGD Symbol;Acc:1310071]
Npc2	chr6	266	213	87.1955	90.0345	2.839	1.03256	0.897984	0.991884	NotSig	-0.00533654	negligible	64.1008	53.8589	74.3427	0.208129	2.24473	1.38032	0.0247854	0.159009	Not Sig	nonsignificant	NPC intracellular cholesterol transporter 2 [Source:RGD Symbol;Acc:628756]
Speg	chr9	126	119	79.7258	81.758	2.03224	1.02549	0.896669	0.991884	NotSig	-0.0541575	negligible	26.7834	24.3929	29.1739	0.286463	0.843596	1.196	0.398895	0.673591	Not Sig	nonsignificant	striated muscle enriched protein kinase [Source:RGD Symbol;Acc:2124]
Aplp1	chr1	2011	2164	80.0856	80.5074	0.42176	1.00527	0.900723	0.992041	NotSig	0.00719067	negligible	571.583	550.221	592.945	0.106576	1.02488	1.07765	0.305419	0.610471	Not Sig	nonsignificant	amyloid beta precursor like protein 1 [Source:RGD Symbol;Acc:69257]
Scg2	chr9	301	310	80.008	80.595	0.587026	1.00734	0.901132	0.992205	NotSig	-0.0125902	negligible	61.8936	61.9901	61.7971	0.230833	-0.125187	0.996887	0.900375	0.953092	Not Sig	nonsignificant	secretogranin II [Source:RGD Symbol;Acc:3626]
Ap1b1	chr14	88	133	93.3711	97.9824	4.61127	1.04939	0.901651	0.992222	NotSig	0.00867366	negligible	25.8661	28.7186	23.0137	0.292779	-1.08949	0.801351	0.275937	0.586762	Not Sig	nonsignificant	adaptor related protein complex 1 subunit beta 1 [Source:RGD Symbol;Acc:2064]
Ndn	chr1	203	246	79.3326	80.998	1.66544	1.02099	0.902578	0.99252	NotSig	0.0758635	negligible	42.6663	45.6789	39.6536	0.241311	-0.948987	0.868094	0.342627	0.631862	Not Sig	nonsignificant	necdin, MAGE family member [Source:RGD Symbol;Acc:1310526]
Gatm	chr3	250	203	85.912	87.8961	1.98404	1.02309	0.903496	0.99252	NotSig	0.0267419	negligible	55.5819	48.6976	62.4662	0.210997	1.78887	1.28273	0.0736353	0.286616	Not Sig	nonsignificant	glycine amidinotransferase [Source:RGD Symbol;Acc:71090]
C1qc	chr5	116	99	73.674	76.4285	2.75448	1.03739	0.904578	0.992825	NotSig	0.0181122	negligible	27.6337	22.2612	33.0061	0.288677	1.81757	1.48268	0.0691292	0.276664	Not Sig	nonsignificant	complement C1q C chain [Source:RGD Symbol;Acc:1306828]
Mllt11	chr2	161	284	81.9696	82.0904	0.120855	1.00147	0.905351	0.993083	NotSig	0.0400047	negligible	46.41	56.5978	36.2221	0.261769	-2.42244	0.639991	0.0154168	0.129642	Not Sig	nonsignificant	MLLT11, transcription factor 7 cofactor [Source:RGD Symbol;Acc:1305525]
Celsr2	chr2	213	263	103.297	105.354	2.05693	1.01991	0.905313	0.993083	NotSig	-0.00638963	negligible	43.7467	49.5696	37.9238	0.241208	-1.61304	0.765062	0.106737	0.359024	Not Sig	nonsignificant	cadherin, EGF LAG seven-pass G-type receptor 2 [Source:RGD Symbol;Acc:69237]
Ssr4	chrX	173	178	63.6736	64.7473	1.07373	1.01686	0.905354	0.993083	NotSig	-0.0420523	negligible	46.0605	43.6593	48.4618	0.236296	0.610968	1.11	0.541221	0.779526	Not Sig	nonsignificant	signal sequence receptor subunit 4 [Source:RGD Symbol;Acc:62034]
Ptov1	chr1	247	250	75.0909	75.5927	0.501875	1.00668	0.906756	0.993205	NotSig	0.00883911	negligible	64.7317	56.7061	72.7573	0.220948	1.47764	1.28306	0.139504	0.411711	Not Sig	nonsignificant	PTOV1, extended AT-hook containing adaptor protein [Source:RGD Symbol;Acc:1306977]
Adam11	chr10	194	223	112.887	118.079	5.19234	1.046	0.906618	0.993205	NotSig	0.0125716	negligible	29.8101	30.6559	28.9643	0.307205	-0.342574	0.944822	0.731919	0.878329	Not Sig	nonsignificant	ADAM metallopeptidase domain 11 [Source:RGD Symbol;Acc:1307515]
Mpzl1	chr13	132	97	83.9468	82.6469	-1.29996	0.984514	0.906793	0.993205	NotSig	0.0805341	negligible	25.4037	19.6542	31.1532	0.300868	2.19117	1.58507	0.0284398	0.17219	Not Sig	nonsignificant	myelin protein zero-like 1 [Source:RGD Symbol;Acc:1359140]
Rell2	chr18	108	110	76.3957	74.1735	-2.22219	0.970912	0.905968	0.993205	NotSig	0.0680711	negligible	26.6078	25.9906	27.2249	0.28265	0.263143	1.04749	0.79244	0.903707	Not Sig	nonsignificant	RELT-like 2 [Source:RGD Symbol;Acc:1305276]
Hsp90aa1	chr6	347	681	91.5404	91.6512	0.110872	1.00121	0.906977	0.993205	NotSig	-0.019856	negligible	152.524	187.477	117.572	0.152041	-4.3772	0.627128	1.20214e-05	0.00274383	FDR<0.05	nonsignificant	heat shock protein 90 alpha family class A member 1 [Source:RGD Symbol;Acc:631409]
Mical2	chr1	159	205	86.514	88.7405	2.22654	1.02574	0.90805	0.993522	NotSig	0.0189796	negligible	44.7815	46.1593	43.4036	0.241223	-0.393291	0.940299	0.694104	0.864041	Not Sig	nonsignificant	microtubule associated monooxygenase, calponin and LIM domain containing 2 [Source:RGD Symbol;Acc:1311773]
Tubb2a	chr17	862	1138	79.0831	78.7525	-0.330557	0.99582	0.909609	0.9942	NotSig	0.00836634	negligible	188.271	211.531	165.011	0.148408	-2.41518	0.78008	0.0157274	0.13028	Not Sig	nonsignificant	tubulin, beta 2A class IIa [Source:RGD Symbol;Acc:1588452]
Jak1	chr5	83	132	98.344	95.1143	-3.22971	0.967159	0.909458	0.9942	NotSig	0.0134607	negligible	25.7898	28.5216	23.058	0.292388	-1.04915	0.808439	0.294108	0.601858	Not Sig	nonsignificant	Janus kinase 1 [Source:RGD Symbol;Acc:69056]
Cnih2	chr1	1208	1207	76.8857	77.7136	0.827813	1.01077	0.912971	0.994422	NotSig	-0.00321262	negligible	319.741	290.366	349.117	0.129148	1.98341	1.20233	0.0473216	0.222535	Not Sig	nonsignificant	cornichon family AMPA receptor auxiliary protein 2 [Source:RGD Symbol;Acc:1304930]
LOC679539	chr14	251	241	67.9881	70.7473	2.75922	1.04058	0.910599	0.994422	NotSig	-0.0176855	negligible	39.8237	38.2421	41.4052	0.260329	0.443307	1.08271	0.657544	0.846472	Not Sig	nonsignificant	similar to ubiquitin-conjugating enzyme E2 variant 1 [Source:RGD Symbol;Acc:1587144]
Pygb	chr3	280	295	91.3289	89.6306	-1.6983	0.981405	0.911224	0.994422	NotSig	0.00552382	negligible	60.9639	59.7205	62.2074	0.208545	0.246132	1.04164	0.80558	0.910584	Not Sig	nonsignificant	glycogen phosphorylase B [Source:RGD Symbol;Acc:3460]
Pdk2	chr10	152	144	77.7205	81.0517	3.33111	1.04286	0.915059	0.994466	NotSig	0.00725817	negligible	34.1105	31.0129	37.2082	0.270836	0.979081	1.19977	0.32754	0.623313	Not Sig	nonsignificant	pyruvate dehydrogenase kinase 2 [Source:RGD Symbol;Acc:69428]
Gnb2	chr12	350	307	72.9493	73.4115	0.462281	1.00634	0.914695	0.994466	NotSig	0.0251802	negligible	88.9426	77.9508	99.9345	0.176118	2.08117	1.28202	0.0374183	0.203694	Not Sig	nonsignificant	G protein subunit beta 2 [Source:RGD Symbol;Acc:69319]
Ckmt1	chr3	201	254	83.8476	85.4783	1.63067	1.01945	0.913383	0.994466	NotSig	0.0134809	negligible	60.2187	63.5097	56.9277	0.205245	-0.797387	0.896362	0.425226	0.692761	Not Sig	nonsignificant	creatine kinase, mitochondrial 1 [Source:RGD Symbol;Acc:61976]
Grin2c	chr10	132	132	85.8028	83.3794	-2.42339	0.971756	0.91718	0.994843	NotSig	0.0342172	negligible	30.2453	28.6722	31.8183	0.29086	0.612432	1.10973	0.540252	0.779526	Not Sig	nonsignificant	glutamate ionotropic receptor NMDA type subunit 2C [Source:RGD Symbol;Acc:2739]
Dbi	chr13	1402	1173	69.6512	70.1899	0.538743	1.00773	0.917507	0.994843	NotSig	-0.0154252	negligible	319.882	266.13	373.633	0.1423	3.50283	1.40395	0.000460339	0.0234019	FDR<0.05	nonsignificant	diazepam binding inhibitor [Source:RGD Symbol;Acc:2490]
Sdf4	chr5	180	164	79.5901	79.9283	0.338203	1.00425	0.917002	0.994843	NotSig	-0.0109116	negligible	38.6725	35.1732	42.1718	0.250898	0.931431	1.19898	0.351631	0.640399	Not Sig	nonsignificant	stromal cell derived factor 4 [Source:RGD Symbol;Acc:621521]
Ppp2r2b	chr18	101	90	73.7438	77.6814	3.93762	1.0534	0.921665	0.996118	NotSig	0.0302925	negligible	27.9912	23.3396	32.6428	0.288963	1.58482	1.3986	0.113007	0.368936	Not Sig	nonsignificant	protein phosphatase 2, regulatory subunit B, beta [Source:RGD Symbol;Acc:631441]
Tmem59	chr5	332	397	69.3959	71.5224	2.12653	1.03064	0.921789	0.996118	NotSig	-0.0684147	negligible	91.7975	90.0927	93.5023	0.176057	0.182755	1.03784	0.854991	0.937169	Not Sig	nonsignificant	transmembrane protein 59 [Source:RGD Symbol;Acc:1310313]
Slc25a23	chr9	517	584	73.9806	75.5473	1.5667	1.02118	0.921934	0.996118	NotSig	-0.0138823	negligible	126.509	129.021	123.998	0.15746	-0.277946	0.961069	0.781054	0.896865	Not Sig	nonsignificant	solute carrier family 25 member 23 [Source:RGD Symbol;Acc:1588586]
Oat	chr1	137	132	80.3839	79.1088	-1.27508	0.984138	0.923812	0.996453	NotSig	0.0257874	negligible	36.1826	33.7454	38.6198	0.261402	0.796515	1.14445	0.425733	0.692908	Not Sig	nonsignificant	ornithine aminotransferase [Source:RGD Symbol;Acc:621724]
Sptbn1	chr14	245	402	90.6292	90.0236	-0.605599	0.993318	0.925549	0.996982	NotSig	0.0134258	negligible	34.5295	41.0534	28.0057	0.286268	-2.02946	0.682178	0.042412	0.212188	Not Sig	nonsignificant	spectrin, beta, non-erythrocytic 1 [Source:RGD Symbol;Acc:727922]
Macf1	chr5	150	129	113.312	118.041	4.72844	1.04173	0.925299	0.996982	NotSig	-0.00175387	negligible	27.1873	26.3566	28.0179	0.30274	0.319302	1.06303	0.749497	0.886932	Not Sig	nonsignificant	microtubule-actin crosslinking factor 1 [Source:RGD Symbol;Acc:1306057]
Nptn	chr8	561	748	96.7788	99.6605	2.88171	1.02978	0.925544	0.996982	NotSig	-0.019961	negligible	145.834	160.324	131.344	0.181494	-1.66729	0.819241	0.095457	0.332502	Not Sig	nonsignificant	neuroplastin [Source:RGD Symbol;Acc:620296]
Pfn2	chr2	251	295	80.6299	82.9769	2.34701	1.02911	0.926056	0.997179	NotSig	-0.00557887	negligible	61.7988	63.0802	60.5174	0.21028	-0.364266	0.959372	0.715659	0.872517	Not Sig	nonsignificant	profilin 2 [Source:RGD Symbol;Acc:621826]
Aplp2	chr8	448	486	104.462	103.989	-0.473672	0.995466	0.926298	0.997256	NotSig	0.0295335	negligible	104.95	108.707	101.194	0.174038	-0.441169	0.930888	0.659091	0.846472	Not Sig	nonsignificant	amyloid beta precursor like protein 2 [Source:RGD Symbol;Acc:2128]
Lrrc10b	chr1	114	199	81.1604	81.455	0.294631	1.00363	0.929153	0.998386	NotSig	0.0128069	negligible	28.0924	36.9459	19.2388	0.282975	-3.34097	0.520728	0.00083485	0.029575	FDR<0.05	nonsignificant	leucine rich repeat containing 10B [Source:RGD Symbol;Acc:1564983]
Rps29	chr6	686	550	68.7707	68.5862	-0.184469	0.997318	0.928957	0.998386	NotSig	0.0320082	negligible	140.614	117.081	164.148	0.231231	2.18433	1.40201	0.0289383	0.174573	Not Sig	nonsignificant	ribosomal protein S29 [Source:RGD Symbol;Acc:3596]
Pdia6	chr6	259	292	73.152	74.1257	0.973647	1.01331	0.930358	0.998557	NotSig	-0.0304519	negligible	74.676	73.0445	76.3076	0.189223	0.296347	1.04467	0.766965	0.896076	Not Sig	nonsignificant	protein disulfide isomerase family A, member 6 [Source:RGD Symbol;Acc:628688]
Csnk1g2	chr7	164	166	58.9264	60.3302	1.40383	1.02382	0.930109	0.998557	NotSig	-0.0177554	negligible	43.1014	38.3516	47.8511	0.249617	1.13242	1.24769	0.25746	0.573856	Not Sig	nonsignificant	casein kinase 1, gamma 2 [Source:RGD Symbol;Acc:621407]
Prkcg	chr1	202	295	113.285	115.456	2.17056	1.01916	0.934368	0.998746	NotSig	-0.000816041	negligible	53.435	62.2484	44.6217	0.227238	-2.06659	0.716832	0.0387731	0.203694	Not Sig	nonsignificant	protein kinase C, gamma [Source:RGD Symbol;Acc:3397]
[truncated: 77 more rows]

## Sheet: summarized_nonA_DRS
transcript	group	polya_median	polya_mean	counts_total	counts_blank	counts_nonA	hits_nonA	counts_C	hits_C	counts_G	hits_G	counts_U	hits_U
[truncated: 91,605 more rows]

[truncated: 3 more sheets: mono_cDNA, poli_cDNA, total_cDNA]
